# Supplementary material for: Human splice factors contribute to latent HIV infection in primary cell models and blood CD4+ T cells from ART-treated individuals
Source: PubMed Central journal article supplement (PMC7728277; doi:10.1371/journal.ppat.1009060), 2020-11-30
Supplement: ppat.1009060.s001.pdf [file ppat.1009060.s001.pdf]

**Table S1. List of statistically significant differentially expressed genes between unstimulated and stimulated peripheral CD4+ T cells from the Resting-cell model.** Genes are ranked by the average log2 fold change (FC).

| Gene       | FC (log2) | p value  | FDR    |
|------------|-----------|----------|--------|
| IFNG       | 14.06     | 1.07E-06 | 0.0165 |
| ZBTB32     | 12.37     | 4.66E-04 | 0.0420 |
| AP003472.1 | 12.27     | 1.01E-04 | 0.0213 |
| CCL4L2     | 11.10     | 2.38E-04 | 0.0307 |
| IL9        | 10.86     | 2.76E-04 | 0.0323 |
| MELK       | 10.75     | 1.62E-05 | 0.0165 |
| P4HA2      | 10.03     | 2.14E-05 | 0.0165 |
| ARFGEF3    | 9.95      | 1.86E-04 | 0.0275 |
| CCL3L3     | 9.81      | 6.99E-06 | 0.0165 |
| MND1       | 9.80      | 3.69E-05 | 0.0165 |
| LINC02416  | 9.77      | 1.52E-04 | 0.0254 |
| CENPM      | 9.66      | 8.28E-05 | 0.0188 |
| CCDC150    | 9.65      | 2.43E-05 | 0.0165 |
| BATF3      | 9.65      | 8.52E-06 | 0.0165 |
| TK1        | 9.63      | 4.58E-04 | 0.0420 |
| RN7SL471P  | 9.63      | 2.31E-04 | 0.0303 |
| NIPAL1     | 9.62      | 7.63E-06 | 0.0165 |
| GALNT18    | 9.61      | 7.52E-06 | 0.0165 |
| FAM57A     | 9.59      | 9.25E-06 | 0.0165 |
| IL13       | 9.22      | 1.52E-05 | 0.0165 |
| IL21       | 9.14      | 2.79E-05 | 0.0165 |
| C9orf172   | 9.14      | 2.66E-05 | 0.0165 |
| AC017002.3 | 9.04      | 1.19E-05 | 0.0165 |
| EMP1       | 9.03      | 1.20E-05 | 0.0165 |
| TREM1      | 8.86      | 1.56E-04 | 0.0259 |
| CDCA2      | 8.78      | 8.07E-05 | 0.0188 |
| FSD1       | 8.73      | 3.21E-04 | 0.0355 |
| C2orf72    | 8.69      | 4.53E-04 | 0.0420 |
| C4orf47    | 8.64      | 8.89E-05 | 0.0197 |
| Z83847.1   | 8.63      | 1.49E-05 | 0.0165 |
| UPK1A-AS1  | 8.62      | 3.02E-05 | 0.0165 |
| HIST1H4A   | 8.59      | 3.39E-05 | 0.0165 |
| PDGFA      | 8.59      | 4.53E-04 | 0.0420 |
| AC078819.1 | 8.55      | 1.15E-05 | 0.0165 |
| SPAG4      | 8.52      | 1.10E-04 | 0.0219 |
| RAC3       | 8.46      | 5.29E-05 | 0.0165 |
| SPC25      | 8.46      | 3.55E-05 | 0.0165 |
| AL158201.1 | 8.43      | 3.44E-05 | 0.0165 |
| RNU1-122P  | 8.42      | 2.95E-05 | 0.0165 |
| BNIP3P1    | 8.42      | 3.64E-04 | 0.0378 |
| DEPDC4     | 8.42      | 4.07E-05 | 0.0165 |
| GJC1       | 8.41      | 2.32E-04 | 0.0303 |

|             |      |          |        |
|-------------|------|----------|--------|
| IGHV1OR15-3 | 8.40 | 1.90E-04 | 0.0276 |
| FAM71B      | 8.36 | 1.52E-05 | 0.0165 |
| PBK         | 8.30 | 1.59E-05 | 0.0165 |
| PDZD4       | 8.30 | 1.47E-05 | 0.0165 |
| AOX1        | 8.29 | 2.03E-05 | 0.0165 |
| CYB5R2      | 8.24 | 5.19E-04 | 0.0443 |
| MAK         | 8.19 | 5.33E-04 | 0.0452 |
| RASAL1      | 8.16 | 1.70E-05 | 0.0165 |
| PLEKHN1     | 8.15 | 2.55E-04 | 0.0311 |
| BSPRY       | 8.12 | 3.35E-04 | 0.0363 |
| PALD1       | 8.03 | 1.83E-04 | 0.0274 |
| GALR2       | 8.02 | 2.45E-04 | 0.0308 |
| TERT        | 8.01 | 1.84E-05 | 0.0165 |
| AL445524.1  | 7.97 | 3.99E-04 | 0.0388 |
| HOXB9       | 7.95 | 1.61E-05 | 0.0165 |
| SLC17A9     | 7.95 | 3.89E-04 | 0.0385 |
| SMOX        | 7.92 | 3.27E-04 | 0.0359 |
| SPTBN2      | 7.89 | 1.70E-05 | 0.0165 |
| C3orf14     | 7.88 | 3.93E-05 | 0.0165 |
| RAI14       | 7.86 | 2.82E-04 | 0.0327 |
| AP000769.1  | 7.85 | 5.03E-04 | 0.0435 |
| RNU4ATAC    | 7.83 | 2.74E-05 | 0.0165 |
| NCS1        | 7.81 | 3.41E-04 | 0.0367 |
| ARRDC4      | 7.79 | 1.65E-04 | 0.0262 |
| AC104261.1  | 7.77 | 2.83E-05 | 0.0165 |
| PLXNB1      | 7.76 | 4.73E-05 | 0.0165 |
| LRTOMT      | 7.72 | 1.58E-05 | 0.0165 |
| STAP2       | 7.72 | 2.56E-04 | 0.0312 |
| PGAM1P2     | 7.71 | 6.08E-05 | 0.0167 |
| TSKU        | 7.68 | 4.71E-04 | 0.0420 |
| AC130324.3  | 7.67 | 3.10E-05 | 0.0165 |
| SECTM1      | 7.67 | 6.70E-05 | 0.0173 |
| RCAN2       | 7.62 | 6.28E-05 | 0.0169 |
| ARHGEF37    | 7.60 | 6.49E-05 | 0.0170 |
| SPR         | 7.59 | 2.03E-05 | 0.0165 |
| B3GNT4      | 7.57 | 3.71E-05 | 0.0165 |
| PHBP3       | 7.57 | 1.80E-04 | 0.0274 |
| AC110373.1  | 7.56 | 2.00E-04 | 0.0280 |
| PSRC1       | 7.56 | 1.97E-04 | 0.0279 |
| C3orf67     | 7.54 | 4.62E-04 | 0.0420 |
| AL049836.1  | 7.53 | 3.43E-04 | 0.0368 |
| FBXO43      | 7.47 | 1.87E-05 | 0.0165 |
| SYNGR3      | 7.47 | 1.12E-04 | 0.0219 |
| LPIN3       | 7.46 | 7.10E-05 | 0.0178 |
| AL109615.3  | 7.42 | 4.49E-05 | 0.0165 |
| CFAP58      | 7.34 | 2.50E-04 | 0.0309 |
| NALT1       | 7.32 | 3.24E-04 | 0.0358 |

|             |      |          |        |
|-------------|------|----------|--------|
| TTC24       | 7.28 | 4.33E-05 | 0.0165 |
| SCDP1       | 7.27 | 5.54E-04 | 0.0463 |
| BX842568.2  | 7.27 | 1.05E-04 | 0.0216 |
| GVQW2       | 7.25 | 7.19E-05 | 0.0178 |
| AC005702.3  | 7.25 | 2.03E-05 | 0.0165 |
| LINC01160   | 7.17 | 2.54E-04 | 0.0311 |
| AL117336.2  | 7.17 | 3.54E-04 | 0.0373 |
| ALDOAP2     | 7.15 | 2.68E-04 | 0.0318 |
| AC114803.1  | 7.10 | 3.82E-04 | 0.0384 |
| CDC20P1     | 7.08 | 2.63E-04 | 0.0316 |
| LINC01686   | 7.07 | 3.20E-04 | 0.0355 |
| ESR2        | 7.07 | 1.36E-04 | 0.0239 |
| MAP3K20-AS1 | 7.04 | 3.83E-04 | 0.0384 |
| AC112721.2  | 7.02 | 5.18E-04 | 0.0443 |
| IL1A        | 7.01 | 2.45E-05 | 0.0165 |
| TM4SF1      | 6.99 | 6.03E-05 | 0.0167 |
| NIPAL4      | 6.98 | 2.41E-05 | 0.0165 |
| CCDC153     | 6.97 | 2.93E-04 | 0.0333 |
| DFNA5       | 6.96 | 1.03E-04 | 0.0213 |
| SLC22A1     | 6.94 | 4.64E-04 | 0.0420 |
| ARVCF       | 6.93 | 3.92E-05 | 0.0165 |
| QPRT        | 6.90 | 2.84E-04 | 0.0329 |
| CTAGE6      | 6.90 | 7.14E-05 | 0.0178 |
| GNG4        | 6.87 | 2.58E-05 | 0.0165 |
| ATP2A1      | 6.85 | 7.45E-05 | 0.0181 |
| RHPN2       | 6.84 | 2.63E-04 | 0.0316 |
| RNVU1-7     | 6.83 | 2.80E-04 | 0.0327 |
| BX539320.1  | 6.83 | 4.77E-05 | 0.0165 |
| RRM2P3      | 6.83 | 2.44E-05 | 0.0165 |
| ZSCAN10     | 6.83 | 2.44E-05 | 0.0165 |
| LINC00158   | 6.83 | 4.10E-04 | 0.0395 |
| AL109914.1  | 6.82 | 3.84E-04 | 0.0384 |
| DHRS9       | 6.80 | 1.59E-04 | 0.0260 |
| CDC42EP2    | 6.79 | 1.24E-04 | 0.0228 |
| LYPLA2P1    | 6.78 | 5.08E-04 | 0.0437 |
| AC105074.1  | 6.78 | 2.75E-05 | 0.0165 |
| KIAA1549    | 6.77 | 1.24E-04 | 0.0228 |
| TWIST1      | 6.73 | 3.83E-04 | 0.0384 |
| CNGA1       | 6.71 | 1.12E-04 | 0.0219 |
| AC016700.3  | 6.66 | 3.28E-05 | 0.0165 |
| AC007608.4  | 6.66 | 6.22E-04 | 0.0497 |
| C11orf74    | 6.62 | 3.83E-04 | 0.0384 |
| GLP1R       | 6.61 | 3.23E-05 | 0.0165 |
| SLC25A5P5   | 6.60 | 4.46E-04 | 0.0420 |
| AC091132.4  | 6.59 | 2.82E-05 | 0.0165 |
| NRN1        | 6.57 | 2.58E-05 | 0.0165 |
| PQLC2       | 6.56 | 2.61E-05 | 0.0165 |

|            |      |          |        |
|------------|------|----------|--------|
| RAC1P4     | 6.54 | 1.92E-04 | 0.0277 |
| AC012085.1 | 6.52 | 1.47E-04 | 0.0248 |
| PITX3      | 6.51 | 3.73E-04 | 0.0380 |
| AC243829.4 | 6.50 | 4.32E-05 | 0.0165 |
| PCDH1      | 6.49 | 3.69E-04 | 0.0379 |
| AC091607.1 | 6.49 | 3.87E-05 | 0.0165 |
| MIR3153    | 6.45 | 2.44E-04 | 0.0308 |
| AC016735.2 | 6.44 | 2.14E-04 | 0.0292 |
| IQANK1     | 6.40 | 1.10E-04 | 0.0219 |
| VPS37D     | 6.37 | 1.83E-04 | 0.0274 |
| AC008083.2 | 6.34 | 2.93E-05 | 0.0165 |
| BX284668.2 | 6.33 | 1.98E-04 | 0.0280 |
| ZFHX2      | 6.30 | 4.06E-05 | 0.0165 |
| AC074351.1 | 6.30 | 2.73E-05 | 0.0165 |
| ECEL1      | 6.29 | 2.23E-04 | 0.0300 |
| DDX11-AS1  | 6.25 | 4.00E-04 | 0.0388 |
| C2CD4D     | 6.24 | 2.78E-05 | 0.0165 |
| TEAD3      | 6.21 | 3.58E-04 | 0.0374 |
| RTN2       | 6.19 | 3.26E-05 | 0.0165 |
| JPH1       | 6.16 | 3.02E-04 | 0.0341 |
| AC017076.1 | 6.15 | 8.86E-05 | 0.0197 |
| OR7E31P    | 6.15 | 1.71E-04 | 0.0267 |
| GMPR       | 6.14 | 3.26E-04 | 0.0358 |
| PEX11G     | 6.13 | 1.83E-04 | 0.0274 |
| AL592164.1 | 6.12 | 6.97E-05 | 0.0177 |
| AC135178.5 | 6.11 | 5.48E-05 | 0.0165 |
| CAPSL      | 6.11 | 2.92E-05 | 0.0165 |
| MCMDC2     | 6.11 | 2.92E-05 | 0.0165 |
| RASL11A    | 6.10 | 3.54E-04 | 0.0373 |
| CDKL2      | 6.09 | 7.09E-05 | 0.0178 |
| LPP-AS2    | 6.08 | 4.55E-05 | 0.0165 |
| TUBBP6     | 6.07 | 4.38E-04 | 0.0416 |
| ZNF385C    | 6.06 | 3.82E-04 | 0.0384 |
| MIR586     | 6.05 | 2.09E-04 | 0.0287 |
| C20orf96   | 6.01 | 1.43E-04 | 0.0245 |
| RIPK4      | 6.00 | 2.41E-04 | 0.0308 |
| THAP12P1   | 5.99 | 7.50E-05 | 0.0181 |
| PRG2       | 5.97 | 5.11E-04 | 0.0437 |
| MAP6D1     | 5.94 | 7.75E-05 | 0.0185 |
| TMEM145    | 5.94 | 3.17E-05 | 0.0165 |
| TNPO1P2    | 5.91 | 1.88E-04 | 0.0276 |
| FAM109B    | 5.91 | 3.21E-05 | 0.0165 |
| MET        | 5.88 | 1.45E-04 | 0.0247 |
| AC021224.1 | 5.88 | 2.59E-04 | 0.0313 |
| NRM        | 5.87 | 4.00E-04 | 0.0388 |
| C1orf194   | 5.87 | 4.18E-04 | 0.0400 |
| OXTR       | 5.86 | 3.31E-05 | 0.0165 |

|            |      |          |        |
|------------|------|----------|--------|
| CHST3      | 5.85 | 4.97E-05 | 0.0165 |
| MIR3161    | 5.85 | 4.97E-05 | 0.0165 |
| NPPC       | 5.83 | 1.71E-04 | 0.0267 |
| PTPRU      | 5.80 | 5.42E-05 | 0.0165 |
| UQCRHP2    | 5.78 | 1.95E-04 | 0.0279 |
| LINC01399  | 5.76 | 4.74E-04 | 0.0421 |
| AC087072.1 | 5.75 | 6.31E-05 | 0.0169 |
| IL22       | 5.74 | 2.23E-04 | 0.0300 |
| DISP3      | 5.73 | 6.01E-05 | 0.0167 |
| RNU6-789P  | 5.72 | 4.72E-04 | 0.0420 |
| CRABP2     | 5.71 | 2.27E-04 | 0.0303 |
| TMEM256    | 5.70 | 3.99E-04 | 0.0388 |
| AC069120.2 | 5.70 | 2.16E-04 | 0.0293 |
| AC136604.2 | 5.69 | 1.81E-04 | 0.0274 |
| MIR604     | 5.68 | 2.47E-04 | 0.0309 |
| SLC2A8     | 5.68 | 3.25E-04 | 0.0358 |
| NAMPT      | 5.67 | 2.04E-06 | 0.0165 |
| GNG8       | 5.65 | 3.46E-05 | 0.0165 |
| AC092017.1 | 5.62 | 4.79E-04 | 0.0422 |
| AC018371.2 | 5.60 | 1.59E-04 | 0.0260 |
| ZEB2-AS1   | 5.57 | 5.55E-04 | 0.0463 |
| AL391832.3 | 5.56 | 2.49E-04 | 0.0309 |
| AC009118.2 | 5.56 | 3.78E-05 | 0.0165 |
| CEL        | 5.53 | 1.88E-04 | 0.0276 |
| TNFRSF4    | 5.49 | 5.72E-04 | 0.0471 |
| BCL2L15    | 5.47 | 1.00E-04 | 0.0213 |
| Z73417.1   | 5.45 | 1.09E-04 | 0.0219 |
| GGT2       | 5.45 | 3.79E-05 | 0.0165 |
| CBSL       | 5.42 | 3.85E-05 | 0.0165 |
| PYGO1      | 5.42 | 3.85E-05 | 0.0165 |
| ZMYND12    | 5.42 | 3.85E-05 | 0.0165 |
| FMO5       | 5.41 | 3.57E-04 | 0.0374 |
| SFN        | 5.37 | 4.04E-05 | 0.0165 |
| AC107954.1 | 5.35 | 2.02E-04 | 0.0281 |
| AC018761.2 | 5.33 | 5.63E-05 | 0.0165 |
| HSPE1P4    | 5.33 | 5.63E-05 | 0.0165 |
| MAP1LC3A   | 5.33 | 5.63E-05 | 0.0165 |
| ACTN3      | 5.30 | 4.88E-05 | 0.0165 |
| HSF2BP     | 5.30 | 4.21E-05 | 0.0165 |
| KRT18P6    | 5.25 | 5.38E-04 | 0.0454 |
| RASD1      | 5.24 | 1.69E-04 | 0.0266 |
| ETNPPL     | 5.11 | 1.43E-04 | 0.0245 |
| NPM1P38    | 5.09 | 3.70E-04 | 0.0379 |
| AL157871.4 | 5.08 | 4.19E-05 | 0.0165 |
| NPM1P31    | 5.08 | 8.19E-05 | 0.0188 |
| PHBP9      | 5.07 | 5.80E-04 | 0.0476 |
| PCDHGB5    | 4.98 | 2.68E-04 | 0.0318 |

|            |      |          |        |
|------------|------|----------|--------|
| RPA2P2     | 4.93 | 6.37E-05 | 0.0169 |
| GAPDH      | 4.90 | 1.41E-04 | 0.0245 |
| DUSP5      | 4.87 | 6.06E-05 | 0.0167 |
| SOCS3      | 4.74 | 4.68E-05 | 0.0165 |
| CDC6       | 4.69 | 4.86E-04 | 0.0427 |
| ENO1       | 4.69 | 2.50E-04 | 0.0309 |
| TPX2       | 4.57 | 8.33E-06 | 0.0165 |
| AC233266.2 | 4.57 | 1.32E-04 | 0.0234 |
| USP27X-AS1 | 4.49 | 3.38E-04 | 0.0364 |
| AL049842.1 | 4.37 | 8.05E-05 | 0.0188 |
| PDCD1      | 4.19 | 2.29E-04 | 0.0303 |
| TTK        | 4.15 | 4.31E-04 | 0.0410 |
| CORO1B     | 4.14 | 5.54E-05 | 0.0165 |
| SDC4       | 3.90 | 9.80E-05 | 0.0211 |
| TUBA1B     | 3.89 | 2.52E-04 | 0.0309 |
| SNORD3B-2  | 3.70 | 2.41E-04 | 0.0308 |
| BRCA1      | 3.70 | 2.27E-04 | 0.0303 |
| BATF       | 3.70 | 1.02E-04 | 0.0213 |
| SNRNP25    | 3.69 | 4.75E-04 | 0.0421 |
| DCLRE1B    | 3.67 | 1.23E-04 | 0.0228 |
| PRELID2    | 3.66 | 2.51E-04 | 0.0309 |
| SYTL3      | 3.65 | 3.95E-04 | 0.0387 |
| KIF15      | 3.56 | 3.86E-04 | 0.0384 |
| RNU1-27P   | 3.53 | 2.00E-04 | 0.0280 |
| TBX21      | 3.51 | 3.09E-04 | 0.0347 |
| TUBAP2     | 3.50 | 4.73E-04 | 0.0420 |
| PGK1       | 3.41 | 1.91E-04 | 0.0276 |
| RAD51AP1   | 3.35 | 4.63E-04 | 0.0420 |
| KIF11      | 3.32 | 4.59E-04 | 0.0420 |
| DHFR       | 3.20 | 5.30E-04 | 0.0450 |
| GNPDA1     | 3.18 | 1.99E-04 | 0.0280 |
| HIST1H4F   | 3.14 | 2.34E-04 | 0.0304 |
| SRGN       | 3.12 | 1.63E-04 | 0.0260 |
| TPM4       | 3.11 | 1.22E-04 | 0.0228 |
| FANCI      | 3.10 | 1.30E-05 | 0.0165 |
| AC015720.2 | 3.10 | 2.91E-04 | 0.0333 |
| STARD4     | 3.06 | 1.11E-04 | 0.0219 |
| SHMT2      | 3.05 | 2.43E-04 | 0.0308 |
| CENPN      | 3.04 | 6.27E-04 | 0.0499 |
| XRCC3      | 2.99 | 4.79E-04 | 0.0422 |
| CHAF1B     | 2.98 | 5.48E-04 | 0.0459 |
| GDPGP1     | 2.95 | 4.51E-04 | 0.0420 |
| TONSL      | 2.89 | 2.93E-04 | 0.0333 |
| EFEMP2     | 2.87 | 1.21E-04 | 0.0228 |
| IL23R      | 2.75 | 3.48E-04 | 0.0370 |
| CLIC1      | 2.74 | 1.22E-05 | 0.0165 |
| TFDP1      | 2.72 | 5.55E-05 | 0.0165 |

|            |      |          |        |
|------------|------|----------|--------|
| WDR76      | 2.65 | 4.10E-04 | 0.0395 |
| MTHFD2     | 2.65 | 3.07E-04 | 0.0345 |
| CD200      | 2.60 | 3.52E-04 | 0.0372 |
| ARID5A     | 2.60 | 7.61E-06 | 0.0165 |
| UBALD2     | 2.46 | 3.50E-04 | 0.0371 |
| RANBP1     | 2.44 | 2.14E-04 | 0.0292 |
| ALO50331.3 | 2.43 | 3.37E-04 | 0.0363 |
| FAM206BP   | 2.43 | 3.37E-04 | 0.0363 |
| MFSD2B     | 2.43 | 3.37E-04 | 0.0363 |
| TRIM60P14  | 2.43 | 3.37E-04 | 0.0363 |
| MDH2       | 2.37 | 6.33E-06 | 0.0165 |
| LIMA1      | 2.36 | 3.96E-05 | 0.0165 |
| PIM3       | 2.33 | 6.21E-05 | 0.0169 |
| CALM3      | 2.26 | 1.92E-04 | 0.0277 |
| FLOT1      | 2.25 | 8.49E-05 | 0.0190 |
| ACTG1      | 2.25 | 4.54E-04 | 0.0420 |
| IL24       | 2.24 | 3.48E-04 | 0.0370 |
| ARSD       | 2.18 | 5.59E-04 | 0.0463 |
| MFSD10     | 2.17 | 1.62E-04 | 0.0260 |
| NCAPD2     | 1.98 | 5.61E-05 | 0.0165 |
| RAB27A     | 1.97 | 2.41E-04 | 0.0308 |
| MRPL47     | 1.96 | 5.05E-04 | 0.0436 |
| RBPJ       | 1.92 | 4.09E-04 | 0.0395 |
| LMAN1      | 1.87 | 1.75E-04 | 0.0269 |
| YEATS2     | 1.86 | 4.57E-04 | 0.0420 |
| ZNF367     | 1.85 | 4.99E-04 | 0.0434 |
| NOB1       | 1.78 | 6.16E-04 | 0.0495 |
| AP3M2      | 1.74 | 2.88E-04 | 0.0331 |
| EIF4H      | 1.73 | 2.89E-05 | 0.0165 |
| SGO2       | 1.66 | 5.62E-04 | 0.0465 |
| ACTN4      | 1.66 | 2.36E-04 | 0.0305 |
| ARF6       | 1.66 | 2.87E-04 | 0.0331 |
| TRMT6      | 1.54 | 5.46E-04 | 0.0458 |
| DOT1L      | 1.54 | 4.40E-04 | 0.0417 |
| CD99       | 1.52 | 1.25E-04 | 0.0228 |
| TMEM63B    | 1.51 | 5.54E-04 | 0.0463 |
| SNHG16     | 1.50 | 6.35E-05 | 0.0169 |
| GNG5       | 1.46 | 6.04E-05 | 0.0167 |
| TXLNA      | 1.46 | 5.90E-04 | 0.0482 |
| JOSD1      | 1.45 | 4.18E-04 | 0.0400 |
| RPSAP15    | 1.45 | 7.60E-05 | 0.0182 |
| DSN1       | 1.45 | 1.96E-04 | 0.0279 |
| NUP155     | 1.42 | 5.52E-05 | 0.0165 |
| LCP1       | 1.39 | 5.66E-05 | 0.0165 |
| PSMD14     | 1.39 | 1.32E-04 | 0.0234 |
| PDAP1      | 1.38 | 4.29E-04 | 0.0408 |
| PTPN11     | 1.38 | 2.56E-04 | 0.0312 |

|           |       |          |        |
|-----------|-------|----------|--------|
| KLHL6     | 1.35  | 6.04E-04 | 0.0488 |
| BRI3BP    | 1.34  | 6.25E-04 | 0.0499 |
| NLE1      | 1.34  | 2.09E-04 | 0.0287 |
| STAT6     | 1.33  | 1.01E-04 | 0.0213 |
| ANKLE2    | 1.31  | 1.55E-04 | 0.0258 |
| PDE4D     | 1.27  | 1.98E-04 | 0.0280 |
| NGLY1     | 1.26  | 1.75E-05 | 0.0165 |
| GPN1      | 1.25  | 2.09E-04 | 0.0287 |
| RANGAP1   | 1.25  | 1.75E-04 | 0.0269 |
| CBR1      | 1.24  | 9.95E-05 | 0.0213 |
| ODF2      | 1.23  | 2.51E-04 | 0.0309 |
| SNRPD2    | 1.22  | 2.33E-04 | 0.0303 |
| PAXIP1    | 1.15  | 2.57E-04 | 0.0312 |
| THAP4     | 1.15  | 7.79E-05 | 0.0185 |
| MAGOH     | 1.06  | 1.60E-04 | 0.0260 |
| SLC25A39  | 1.06  | 5.26E-04 | 0.0448 |
| LSM12     | 1.05  | 2.77E-04 | 0.0323 |
| SEC13     | 1.05  | 1.20E-04 | 0.0228 |
| GARS      | 1.01  | 2.69E-04 | 0.0318 |
| RMDN1     | 0.94  | 5.99E-05 | 0.0167 |
| TRIR      | 0.86  | 5.56E-04 | 0.0463 |
| RBM42     | 0.66  | 6.17E-04 | 0.0495 |
| MORF4L1P1 | 0.62  | 5.45E-04 | 0.0458 |
| PCNT      | 0.58  | 2.88E-04 | 0.0331 |
| GALM      | 0.57  | 1.81E-04 | 0.0274 |
| RAB1A     | 0.56  | 1.57E-04 | 0.0259 |
| GSPT1     | 0.45  | 3.72E-04 | 0.0380 |
| RAP1B     | -0.55 | 2.39E-04 | 0.0308 |
| MRPS10    | -0.58 | 5.10E-04 | 0.0437 |
| LEMD3     | -0.62 | 3.49E-04 | 0.0370 |
| RSF1      | -0.65 | 1.23E-04 | 0.0228 |
| FNIP1     | -0.67 | 5.91E-04 | 0.0482 |
| DNAJB14   | -0.70 | 5.43E-04 | 0.0457 |
| GPATCH2L  | -0.73 | 4.68E-04 | 0.0420 |
| HIPK3     | -0.73 | 2.29E-04 | 0.0303 |
| PAPOLA    | -0.75 | 2.49E-04 | 0.0309 |
| ZNF814    | -0.77 | 1.26E-04 | 0.0228 |
| MORC2     | -0.81 | 4.80E-04 | 0.0422 |
| ELK4      | -0.89 | 1.87E-05 | 0.0165 |
| FYCO1     | -0.91 | 4.70E-04 | 0.0420 |
| PPWD1     | -0.92 | 4.52E-04 | 0.0420 |
| ZEB1      | -0.94 | 4.63E-05 | 0.0165 |
| PHF3      | -0.94 | 2.97E-04 | 0.0336 |
| MSL2      | -0.96 | 3.91E-04 | 0.0385 |
| STYX      | -0.98 | 1.73E-04 | 0.0269 |
| CCDC88C   | -0.98 | 7.31E-05 | 0.0179 |
| SAFB2     | -1.00 | 1.91E-04 | 0.0276 |



|             |       |          |        |
|-------------|-------|----------|--------|
| RNF115      | -1.02 | 2.70E-04 | 0.0319 |
| MIA3        | -1.06 | 5.21E-05 | 0.0165 |
| ANKMY2      | -1.06 | 3.32E-04 | 0.0362 |
| RCSD1       | -1.09 | 4.92E-04 | 0.0428 |
| ZRANB1      | -1.11 | 3.68E-04 | 0.0379 |
| FBXW7       | -1.11 | 3.94E-05 | 0.0165 |
| PIKFYVE     | -1.11 | 5.57E-04 | 0.0463 |
| MFN1        | -1.12 | 3.97E-04 | 0.0388 |
| IFT172      | -1.12 | 1.76E-04 | 0.0269 |
| DDX17       | -1.13 | 1.96E-04 | 0.0279 |
| TRMT2B      | -1.14 | 1.71E-04 | 0.0267 |
| ERAP2       | -1.15 | 1.11E-04 | 0.0219 |
| CCM2        | -1.16 | 4.91E-04 | 0.0428 |
| RPS6KA3     | -1.21 | 3.13E-04 | 0.0350 |
| MBTPS1      | -1.23 | 4.76E-04 | 0.0421 |
| RBM12B      | -1.26 | 2.45E-04 | 0.0308 |
| ZNF333      | -1.30 | 2.49E-04 | 0.0309 |
| BIN2        | -1.31 | 4.61E-04 | 0.0420 |
| FMR1        | -1.31 | 4.53E-04 | 0.0420 |
| CCNT2       | -1.32 | 6.17E-04 | 0.0495 |
| CNTRL       | -1.33 | 4.88E-05 | 0.0165 |
| SOAT1       | -1.33 | 7.53E-05 | 0.0181 |
| STXBP5      | -1.35 | 2.32E-04 | 0.0303 |
| STAG3L5P    | -1.36 | 3.76E-04 | 0.0383 |
| PURA        | -1.38 | 4.55E-05 | 0.0165 |
| CENPC       | -1.39 | 8.01E-06 | 0.0165 |
| SLC15A2     | -1.40 | 5.86E-04 | 0.0480 |
| ZNF793      | -1.40 | 2.20E-04 | 0.0298 |
| ZNF792      | -1.41 | 3.80E-05 | 0.0165 |
| ZNF227      | -1.43 | 1.12E-04 | 0.0219 |
| ASAH1       | -1.43 | 5.41E-04 | 0.0456 |
| GIMAP4      | -1.46 | 1.23E-04 | 0.0228 |
| TMEM116     | -1.47 | 7.24E-05 | 0.0179 |
| IKBKE       | -1.53 | 4.53E-04 | 0.0420 |
| TRAJ23      | -1.57 | 4.02E-05 | 0.0165 |
| WDR73       | -1.58 | 8.11E-05 | 0.0188 |
| PSMA3-AS1   | -1.60 | 1.77E-04 | 0.0270 |
| AL513548.3  | -1.62 | 4.58E-04 | 0.0420 |
| CCNL2       | -1.63 | 1.82E-04 | 0.0274 |
| SSBP2       | -1.64 | 6.14E-04 | 0.0494 |
| THRA        | -1.64 | 3.15E-05 | 0.0165 |
| MED21       | -1.70 | 3.90E-05 | 0.0165 |
| MAN1C1      | -1.71 | 4.76E-04 | 0.0421 |
| MTHFD2L     | -1.72 | 3.59E-04 | 0.0374 |
| BRWD1       | -1.75 | 9.23E-05 | 0.0202 |
| RNU4ATAC11P | -1.77 | 5.58E-04 | 0.0463 |
| ZNF548      | -1.78 | 4.91E-04 | 0.0428 |

|            |       |          |        |
|------------|-------|----------|--------|
| AL356801.1 | -1.80 | 1.18E-04 | 0.0225 |
| ITGA10     | -1.80 | 2.27E-04 | 0.0303 |
| REV1       | -1.80 | 5.10E-04 | 0.0437 |
| RNF216     | -1.85 | 4.67E-04 | 0.0420 |
| TULP4      | -1.85 | 1.52E-04 | 0.0254 |
| ZNF235     | -1.86 | 8.25E-05 | 0.0188 |
| AC108010.1 | -1.88 | 1.30E-04 | 0.0232 |
| TGFBR3     | -1.92 | 1.69E-04 | 0.0266 |
| SNHG14     | -1.92 | 1.14E-04 | 0.0221 |
| LINC01138  | -1.93 | 4.71E-04 | 0.0420 |
| AC135983.2 | -1.98 | 3.05E-04 | 0.0344 |
| MGAT4A     | -2.00 | 3.34E-05 | 0.0165 |
| MAP3K1     | -2.03 | 2.39E-05 | 0.0165 |
| L3MBTL3    | -2.11 | 3.87E-04 | 0.0385 |
| ZNF75D     | -2.21 | 4.72E-04 | 0.0420 |
| L3HYPDH    | -2.21 | 1.63E-04 | 0.0260 |
| GLIPR1     | -2.22 | 1.02E-04 | 0.0213 |
| UTRN       | -2.23 | 2.00E-06 | 0.0165 |
| SMCR8      | -2.24 | 1.75E-05 | 0.0165 |
| MCEE       | -2.26 | 4.66E-04 | 0.0420 |
| IRS2       | -2.27 | 3.79E-04 | 0.0384 |
| PARP8      | -2.33 | 4.72E-04 | 0.0420 |
| LEF1-AS1   | -2.38 | 3.84E-04 | 0.0384 |
| TRBV12-2   | -2.38 | 3.85E-04 | 0.0384 |
| ZNF44      | -2.39 | 1.01E-04 | 0.0213 |
| ITM2B      | -2.54 | 2.66E-04 | 0.0318 |
| ZNF767P    | -2.59 | 6.26E-04 | 0.0499 |
| SORL1      | -2.60 | 7.57E-05 | 0.0182 |
| TC2N       | -2.66 | 1.16E-05 | 0.0165 |
| RASSF3     | -2.71 | 6.01E-04 | 0.0487 |
| AL392172.1 | -2.74 | 1.74E-04 | 0.0269 |
| AMY2B      | -2.77 | 4.72E-04 | 0.0420 |
| ZNF879     | -2.80 | 1.37E-04 | 0.0239 |
| STK38      | -2.80 | 1.03E-04 | 0.0213 |
| IPCEF1     | -2.81 | 2.03E-04 | 0.0282 |
| AP001767.4 | -2.82 | 1.58E-04 | 0.0260 |
| SCML4      | -2.84 | 3.11E-04 | 0.0349 |
| PLCL1      | -2.89 | 1.11E-04 | 0.0219 |
| AC232271.1 | -2.90 | 1.42E-04 | 0.0245 |
| FYB1       | -2.99 | 4.60E-04 | 0.0420 |
| SAMD9      | -3.02 | 6.34E-05 | 0.0169 |
| KLF3       | -3.03 | 1.17E-04 | 0.0225 |
| KIAA1551   | -3.04 | 1.77E-04 | 0.0270 |
| GIMAP1     | -3.08 | 1.82E-04 | 0.0274 |
| GIMAP7     | -3.12 | 1.39E-04 | 0.0243 |
| GBP3       | -3.13 | 3.20E-04 | 0.0355 |
| SLC16A10   | -3.17 | 4.21E-04 | 0.0401 |

|            |       |          |        |
|------------|-------|----------|--------|
| TRANK1     | -3.17 | 2.61E-04 | 0.0315 |
| PRR13      | -3.19 | 5.60E-05 | 0.0165 |
| ZNF181     | -3.30 | 2.06E-04 | 0.0285 |
| EVI2B      | -3.52 | 5.62E-05 | 0.0165 |
| AL353194.1 | -3.57 | 2.37E-04 | 0.0307 |
| ZNF559     | -3.60 | 4.53E-05 | 0.0165 |
| ATM        | -3.72 | 2.33E-04 | 0.0303 |
| AL133375.1 | -3.87 | 6.87E-05 | 0.0176 |
| LINC02078  | -4.04 | 5.02E-04 | 0.0434 |
| AC005899.5 | -4.36 | 5.54E-05 | 0.0165 |
| ZNRF2P2    | -4.63 | 4.99E-04 | 0.0434 |
| SOWAHD     | -4.64 | 1.18E-04 | 0.0225 |
| AP000911.3 | -4.73 | 4.72E-05 | 0.0165 |
| Z95114.3   | -4.82 | 1.19E-04 | 0.0228 |
| EDAR       | -4.83 | 2.75E-05 | 0.0165 |
| AC079921.1 | -4.83 | 1.27E-04 | 0.0229 |
| NPM1P33    | -4.90 | 1.24E-04 | 0.0228 |
| KLHDC1     | -4.97 | 6.11E-04 | 0.0492 |
| COL9A3     | -4.99 | 6.18E-04 | 0.0495 |
| AC253576.2 | -5.08 | 3.69E-04 | 0.0379 |
| RN7SL840P  | -5.10 | 2.07E-04 | 0.0286 |
| AC005899.1 | -5.22 | 2.17E-04 | 0.0294 |
| RN7SL508P  | -5.33 | 1.44E-04 | 0.0245 |
| BANK1      | -5.34 | 5.91E-04 | 0.0482 |
| AL928654.4 | -5.36 | 3.44E-04 | 0.0368 |
| RN7SL242P  | -5.36 | 1.99E-04 | 0.0280 |
| AL159163.1 | -5.42 | 5.32E-05 | 0.0165 |
| AL391497.1 | -5.56 | 5.56E-05 | 0.0165 |
| OSGIN1     | -5.58 | 5.76E-05 | 0.0166 |
| MIR4459    | -5.59 | 3.34E-04 | 0.0363 |
| AC073389.3 | -5.61 | 5.04E-05 | 0.0165 |
| AC008967.1 | -5.62 | 3.47E-05 | 0.0165 |
| AC007292.1 | -5.63 | 5.97E-05 | 0.0167 |
| AK4P4      | -5.65 | 3.43E-05 | 0.0165 |
| PWAR1      | -5.66 | 3.69E-04 | 0.0379 |
| SLC7A7     | -5.66 | 3.69E-04 | 0.0379 |
| RNY1P16    | -5.66 | 4.51E-05 | 0.0165 |
| CACNA1E    | -5.68 | 3.91E-05 | 0.0165 |
| OR13C5     | -5.74 | 3.40E-05 | 0.0165 |
| AC108002.1 | -5.75 | 6.10E-04 | 0.0492 |
| ESRRAP1    | -5.75 | 5.09E-04 | 0.0437 |
| AP000255.1 | -5.78 | 4.72E-04 | 0.0420 |
| SLC45A2    | -5.78 | 4.72E-04 | 0.0420 |
| DNM1       | -5.80 | 3.19E-04 | 0.0355 |
| AC090517.2 | -5.80 | 1.06E-04 | 0.0216 |
| LEXM       | -5.85 | 3.26E-04 | 0.0358 |
| IL12A      | -5.87 | 3.60E-04 | 0.0375 |

|              |       |          |        |
|--------------|-------|----------|--------|
| AL357793.1   | -5.88 | 6.55E-05 | 0.0170 |
| MTND2P13     | -5.89 | 8.03E-05 | 0.0188 |
| AL121983.2   | -5.97 | 1.40E-04 | 0.0243 |
| AC012358.3   | -6.01 | 1.59E-04 | 0.0260 |
| CDKN2B-AS1   | -6.03 | 6.77E-05 | 0.0174 |
| EIF4EBP2P2   | -6.07 | 2.66E-04 | 0.0318 |
| AC018511.2   | -6.07 | 3.10E-05 | 0.0165 |
| SRCIN1       | -6.07 | 1.08E-04 | 0.0219 |
| SNORD38C     | -6.08 | 4.00E-05 | 0.0165 |
| BEND7P1      | -6.13 | 4.20E-05 | 0.0165 |
| AC007881.3   | -6.14 | 1.14E-04 | 0.0222 |
| ADAMTS7P1    | -6.16 | 1.66E-04 | 0.0263 |
| LIN7A        | -6.17 | 1.63E-04 | 0.0260 |
| RN7SL569P    | -6.18 | 4.44E-05 | 0.0165 |
| AC022395.1   | -6.19 | 6.41E-05 | 0.0169 |
| ARHGAP26-IT1 | -6.19 | 6.41E-05 | 0.0169 |
| TRHDE-AS1    | -6.19 | 5.17E-05 | 0.0165 |
| AGGF1P2      | -6.20 | 5.01E-04 | 0.0434 |
| P2RX6        | -6.25 | 9.19E-05 | 0.0202 |
| DM1-AS       | -6.27 | 4.72E-04 | 0.0420 |
| AL354793.1   | -6.27 | 2.78E-05 | 0.0165 |
| AC011446.1   | -6.28 | 4.15E-04 | 0.0398 |
| RHCE         | -6.29 | 2.44E-04 | 0.0308 |
| RN7SL688P    | -6.29 | 2.44E-04 | 0.0308 |
| CLU          | -6.30 | 2.77E-04 | 0.0323 |
| SLC16A13     | -6.37 | 1.52E-04 | 0.0254 |
| IGLV3-12     | -6.38 | 3.81E-04 | 0.0384 |
| HPGDS        | -6.41 | 2.91E-04 | 0.0333 |
| RASGRF2-AS1  | -6.44 | 3.58E-04 | 0.0374 |
| SV2B         | -6.44 | 2.86E-04 | 0.0330 |
| BX537318.2   | -6.47 | 5.80E-04 | 0.0476 |
| WNT2B        | -6.48 | 3.96E-05 | 0.0165 |
| CABYR        | -6.48 | 2.48E-04 | 0.0309 |
| TTC39C-AS1   | -6.50 | 4.21E-04 | 0.0401 |
| AL139022.1   | -6.53 | 8.22E-05 | 0.0188 |
| AL591721.1   | -6.53 | 8.22E-05 | 0.0188 |
| EEPD1        | -6.54 | 4.88E-04 | 0.0427 |
| AL117344.1   | -6.54 | 4.05E-04 | 0.0391 |
| UBR5-AS1     | -6.55 | 2.76E-05 | 0.0165 |
| AL138762.1   | -6.56 | 4.27E-05 | 0.0165 |
| AC246785.2   | -6.57 | 3.59E-05 | 0.0165 |
| AL139124.1   | -6.61 | 8.35E-05 | 0.0188 |
| RNASEH2B-AS1 | -6.61 | 2.82E-04 | 0.0327 |
| RNU6-761P    | -6.61 | 1.09E-04 | 0.0219 |
| TFEC         | -6.61 | 1.09E-04 | 0.0219 |
| BRWD1-AS2    | -6.63 | 3.55E-05 | 0.0165 |
| AC092747.2   | -6.67 | 7.36E-05 | 0.0180 |

|               |       |          |        |
|---------------|-------|----------|--------|
| AL358933.1    | -6.67 | 2.96E-04 | 0.0336 |
| AP001372.4    | -6.69 | 1.25E-04 | 0.0228 |
| LINC00205     | -6.72 | 6.04E-04 | 0.0488 |
| AC007773.1    | -6.72 | 3.04E-05 | 0.0165 |
| FAM204BP      | -6.73 | 3.94E-04 | 0.0387 |
| AC010754.1    | -6.74 | 4.70E-04 | 0.0420 |
| AC007637.1    | -6.74 | 5.72E-05 | 0.0166 |
| CDC42-IT1     | -6.77 | 1.86E-04 | 0.0275 |
| CPEB2-AS1     | -6.77 | 4.06E-05 | 0.0165 |
| AL356020.1    | -6.79 | 1.28E-04 | 0.0231 |
| BTG1P1        | -6.80 | 5.17E-05 | 0.0165 |
| LRRK2         | -6.80 | 4.24E-05 | 0.0165 |
| AC243654.2    | -6.80 | 5.91E-04 | 0.0482 |
| MMP2          | -6.81 | 3.34E-05 | 0.0165 |
| AC110792.1    | -6.81 | 2.24E-04 | 0.0300 |
| AC022098.2    | -6.82 | 2.94E-04 | 0.0334 |
| AL137779.2    | -6.84 | 2.66E-05 | 0.0165 |
| ARHGEF40      | -6.84 | 1.62E-04 | 0.0260 |
| CTD-3080P12.3 | -6.86 | 2.41E-04 | 0.0308 |
| DNM1P46       | -6.87 | 2.12E-05 | 0.0165 |
| RNU6-808P     | -6.88 | 9.42E-05 | 0.0205 |
| MIR4644       | -6.88 | 3.59E-04 | 0.0374 |
| C1GALT1P1     | -6.89 | 8.44E-05 | 0.0190 |
| AC104447.1    | -6.89 | 1.61E-04 | 0.0260 |
| LINC01504     | -6.89 | 5.34E-04 | 0.0452 |
| AC002091.1    | -6.91 | 5.97E-04 | 0.0485 |
| MPEG1         | -6.93 | 1.96E-04 | 0.0279 |
| AC097527.1    | -6.93 | 1.90E-04 | 0.0276 |
| AC133555.1    | -6.93 | 3.86E-04 | 0.0384 |
| NPIPP1        | -6.95 | 4.92E-05 | 0.0165 |
| AC012291.1    | -6.96 | 4.26E-05 | 0.0165 |
| AL109917.1    | -6.97 | 2.08E-05 | 0.0165 |
| AC008555.1    | -6.98 | 3.74E-04 | 0.0381 |
| RNU6-606P     | -7.00 | 4.47E-05 | 0.0165 |
| AC079360.1    | -7.01 | 9.44E-05 | 0.0205 |
| AC110053.1    | -7.03 | 3.30E-05 | 0.0165 |
| AC010245.2    | -7.04 | 9.47E-05 | 0.0205 |
| AC016168.2    | -7.05 | 5.02E-05 | 0.0165 |
| GPR156        | -7.06 | 1.25E-04 | 0.0228 |
| AC104966.1    | -7.08 | 2.16E-05 | 0.0165 |
| NPM1P49       | -7.09 | 2.04E-05 | 0.0165 |
| AC138409.1    | -7.11 | 3.29E-04 | 0.0360 |
| MIR99AHG      | -7.11 | 5.64E-04 | 0.0466 |
| AC004908.3    | -7.11 | 9.11E-05 | 0.0201 |
| AP003356.1    | -7.12 | 1.03E-04 | 0.0213 |
| IGSF6         | -7.14 | 5.80E-05 | 0.0166 |
| WDR86-AS1     | -7.14 | 4.87E-04 | 0.0427 |

|            |       |          |        |
|------------|-------|----------|--------|
| AL136368.1 | -7.16 | 1.30E-04 | 0.0232 |
| AL606491.1 | -7.16 | 1.30E-04 | 0.0232 |
| IGLV2-14   | -7.17 | 5.81E-05 | 0.0166 |
| AC011816.1 | -7.18 | 4.66E-04 | 0.0420 |
| AL358472.1 | -7.19 | 3.91E-04 | 0.0385 |
| C11orf94   | -7.21 | 1.74E-04 | 0.0269 |
| AC005480.1 | -7.22 | 1.86E-04 | 0.0275 |
| AC116096.1 | -7.23 | 4.83E-05 | 0.0165 |
| CCSER1     | -7.24 | 4.65E-04 | 0.0420 |
| RPL23AP72  | -7.24 | 4.65E-04 | 0.0420 |
| AL031274.1 | -7.25 | 2.72E-04 | 0.0320 |
| PRKG1      | -7.26 | 2.65E-05 | 0.0165 |
| LILRB4     | -7.26 | 5.40E-05 | 0.0165 |
| RPSAP16    | -7.27 | 3.43E-04 | 0.0368 |
| ZNF582-AS1 | -7.30 | 4.21E-05 | 0.0165 |
| ZGLP1      | -7.30 | 9.90E-05 | 0.0213 |
| BCO2       | -7.30 | 1.86E-05 | 0.0165 |
| AC025171.4 | -7.32 | 2.74E-04 | 0.0322 |
| MIR505     | -7.34 | 2.69E-04 | 0.0318 |
| AC127070.3 | -7.34 | 2.12E-04 | 0.0290 |
| AP001157.1 | -7.34 | 1.63E-04 | 0.0260 |
| POU5F1P5   | -7.36 | 3.88E-04 | 0.0385 |
| IGHA1      | -7.36 | 1.77E-05 | 0.0165 |
| AC005306.1 | -7.39 | 2.20E-05 | 0.0165 |
| ACE        | -7.39 | 2.64E-05 | 0.0165 |
| PFN2       | -7.40 | 2.29E-04 | 0.0303 |
| AL162274.3 | -7.43 | 2.63E-04 | 0.0316 |
| SLC23A3    | -7.45 | 6.01E-04 | 0.0487 |
| AL390066.1 | -7.45 | 3.92E-04 | 0.0386 |
| KCNA2      | -7.46 | 1.86E-04 | 0.0275 |
| RN7SL753P  | -7.47 | 2.36E-05 | 0.0165 |
| CFL1P1     | -7.48 | 3.86E-05 | 0.0165 |
| AC007780.1 | -7.55 | 3.68E-04 | 0.0379 |
| CHMP1B2P   | -7.55 | 6.54E-05 | 0.0170 |
| AP003035.1 | -7.61 | 5.34E-04 | 0.0452 |
| AC010627.1 | -7.61 | 1.05E-04 | 0.0216 |
| SYNPO2     | -7.63 | 4.03E-04 | 0.0391 |
| AC018845.3 | -7.63 | 4.39E-05 | 0.0165 |
| CR2        | -7.64 | 1.32E-04 | 0.0234 |
| PSMD10P1   | -7.64 | 1.24E-04 | 0.0228 |
| TMEM191A   | -7.65 | 5.85E-05 | 0.0167 |
| STAB1      | -7.69 | 5.14E-04 | 0.0440 |
| AC018868.2 | -7.70 | 6.27E-05 | 0.0169 |
| GPR146     | -7.71 | 3.52E-05 | 0.0165 |
| AC020659.1 | -7.75 | 2.46E-04 | 0.0308 |
| AC022079.1 | -7.80 | 1.16E-04 | 0.0224 |
| AC234782.4 | -7.84 | 4.54E-04 | 0.0420 |

|             |       |          |        |
|-------------|-------|----------|--------|
| AC018926.3  | -7.94 | 3.46E-04 | 0.0369 |
| POT1-AS1    | -7.97 | 1.36E-04 | 0.0239 |
| SLC14A1     | -8.00 | 5.51E-05 | 0.0165 |
| CPA3        | -8.00 | 4.61E-04 | 0.0420 |
| TSC22D1-AS1 | -8.01 | 1.03E-04 | 0.0213 |
| FAM234A     | -8.02 | 2.19E-05 | 0.0165 |
| KLRB1       | -8.03 | 4.03E-05 | 0.0165 |
| LINC01719   | -8.04 | 1.44E-04 | 0.0245 |
| AC027682.4  | -8.10 | 1.26E-04 | 0.0229 |
| LIPT2       | -8.13 | 1.34E-05 | 0.0165 |
| CASP1P2     | -8.21 | 1.46E-05 | 0.0165 |
| PLXDC2      | -8.21 | 1.88E-04 | 0.0276 |
| LINC01624   | -8.22 | 2.19E-05 | 0.0165 |
| AP002365.1  | -8.35 | 1.95E-04 | 0.0279 |
| AC023090.2  | -8.50 | 1.91E-05 | 0.0165 |
| AC241520.1  | -8.51 | 6.94E-05 | 0.0177 |
| AC008014.1  | -8.57 | 3.25E-05 | 0.0165 |
| FGF9        | -8.60 | 4.81E-05 | 0.0165 |
| SLC22A23    | -8.60 | 7.20E-05 | 0.0178 |
| AC099494.3  | -8.63 | 2.03E-04 | 0.0282 |
| AC011726.3  | -8.65 | 4.71E-05 | 0.0165 |
| AC046136.1  | -8.67 | 4.00E-04 | 0.0388 |
| WNT7A       | -8.87 | 2.18E-05 | 0.0165 |
| PCDH9       | -8.90 | 4.19E-05 | 0.0165 |
| C12orf42    | -8.92 | 3.15E-04 | 0.0351 |
| PPP2R2B     | -8.95 | 1.52E-04 | 0.0254 |
| ACTN1-AS1   | -8.97 | 3.75E-05 | 0.0165 |
| KRT1        | -8.98 | 2.32E-04 | 0.0303 |
| LINC02362   | -9.12 | 1.55E-05 | 0.0165 |
| LINC02328   | -9.12 | 1.53E-05 | 0.0165 |
| AL670729.1  | -9.13 | 1.66E-04 | 0.0263 |
| FAM19A1     | -9.25 | 8.30E-05 | 0.0188 |
| MYO16       | -9.32 | 5.65E-04 | 0.0466 |
| KLF3-AS1    | -9.34 | 1.47E-04 | 0.0248 |
| LINC00824   | -9.50 | 6.85E-06 | 0.0165 |
| GPA33       | -9.61 | 1.74E-05 | 0.0165 |
| OCM         | -9.64 | 2.60E-04 | 0.0315 |
| DSC1        | -9.70 | 5.58E-04 | 0.0463 |
| B3GALT2     | -9.73 | 4.83E-05 | 0.0165 |
| CR1         | -9.75 | 7.93E-05 | 0.0187 |
| HCG27       | -9.97 | 2.01E-05 | 0.0165 |
