# Supplementary material for: Human splice factors contribute to latent HIV infection in primary cell models and blood CD4+ T cells from ART-treated individuals
Source: PubMed Central journal article supplement (PMC7728277; doi:10.1371/journal.ppat.1009060), 2020-11-30
Supplement: ppat.1009060.s002.pdf [file ppat.1009060.s002.pdf]

**Table S2. List of statistically significant differentially expressed genes between unstimulated and stimulated peripheral CD4+ T cells from the Wild-type model.** Genes are ranked by the average log2 fold change (FC).

| Gene             | FC (log2) | p value  | FDR    |
|------------------|-----------|----------|--------|
| IL2              | 13.79     | 8.56E-07 | 0.0014 |
| ZBED2            | 11.11     | 5.20E-05 | 0.0027 |
| MYOF             | 11.04     | 1.28E-05 | 0.0018 |
| AP003472.1       | 10.48     | 2.68E-06 | 0.0014 |
| GOS2             | 10.22     | 9.28E-07 | 0.0014 |
| FABP5P7          | 9.56      | 1.23E-05 | 0.0018 |
| ENST000003232744 | 9.43      | 2.84E-04 | 0.0045 |
| NR4A3            | 9.29      | 1.15E-04 | 0.0033 |
| HMGB1P17         | 9.24      | 5.19E-06 | 0.0016 |
| IRF8             | 9.02      | 8.93E-06 | 0.0016 |
| ENST000002568760 | 9.02      | 1.47E-02 | 0.0370 |
| ENST00000318981  | 8.93      | 5.76E-06 | 0.0016 |
| ADM              | 8.91      | 3.60E-06 | 0.0015 |
| ENST000003150501 | 8.66      | 5.57E-06 | 0.0016 |
| GZMB             | 8.61      | 1.05E-03 | 0.0079 |
| IL1A             | 8.56      | 4.06E-05 | 0.0024 |
| IGHM             | 8.54      | 1.51E-04 | 0.0036 |
| CDC45            | 8.53      | 1.09E-06 | 0.0014 |
| ENST000002636302 | 8.45      | 5.83E-05 | 0.0028 |
| ENST000003127830 | 8.44      | 1.25E-05 | 0.0018 |
| ENST000002288433 | 8.41      | 6.36E-06 | 0.0016 |
| EGR2             | 8.38      | 3.36E-05 | 0.0023 |
| IL24             | 8.33      | 4.88E-05 | 0.0026 |
| LINC00158        | 8.32      | 2.63E-05 | 0.0021 |
| TUBB6            | 8.31      | 1.24E-04 | 0.0035 |
| LINC02341        | 8.31      | 1.45E-06 | 0.0014 |
| GALNT18          | 8.25      | 1.97E-05 | 0.0020 |
| IGSF3            | 8.18      | 2.01E-04 | 0.0040 |
| MYO1B            | 8.15      | 8.61E-04 | 0.0072 |
| DHFRP1           | 8.12      | 8.74E-06 | 0.0016 |
| LINC02051        | 8.11      | 3.37E-05 | 0.0023 |
| CTTN             | 8.11      | 8.07E-06 | 0.0016 |
| ENST000003082782 | 8.10      | 3.68E-05 | 0.0023 |
| ENST000003083610 | 8.07      | 5.31E-05 | 0.0027 |
| ENST000003109550 | 8.07      | 2.74E-06 | 0.0014 |
| CCL3             | 8.00      | 8.39E-04 | 0.0071 |
| CCL4             | 7.93      | 2.11E-03 | 0.0113 |
| ENST000003018432 | 7.90      | 2.28E-06 | 0.0014 |
| MT3              | 7.87      | 1.79E-05 | 0.0020 |
| ENST000003237600 | 7.86      | 5.34E-04 | 0.0058 |
| ENST000003141631 | 7.85      | 1.50E-05 | 0.0019 |
| ENST000002587810 | 7.85      | 1.06E-03 | 0.0079 |
| ENST000002743760 | 7.79      | 1.74E-05 | 0.0020 |
| ENST000002590431 | 7.78      | 4.42E-03 | 0.0172 |
| SPR              | 7.78      | 1.57E-05 | 0.0019 |

|                  |      |          |        |
|------------------|------|----------|--------|
| ENST000003566570 | 7.76 | 9.91E-05 | 0.0032 |
| UBE2C            | 7.72 | 2.11E-04 | 0.0041 |
| DGKI             | 7.71 | 1.50E-05 | 0.0019 |
| IL21-AS1         | 7.71 | 1.91E-03 | 0.0107 |
| SLC27A2          | 7.67 | 2.49E-04 | 0.0043 |
| DDIT4L           | 7.66 | 3.82E-05 | 0.0023 |
| EXO1             | 7.64 | 7.60E-07 | 0.0014 |
| DOK5             | 7.58 | 5.35E-05 | 0.0027 |
| SETBP1           | 7.49 | 2.38E-04 | 0.0042 |
| PBK              | 7.48 | 1.38E-06 | 0.0014 |
| ENST000003331371 | 7.48 | 2.27E-05 | 0.0020 |
| GPR87            | 7.48 | 2.47E-03 | 0.0124 |
| ENST000003157112 | 7.45 | 5.03E-03 | 0.0185 |
| RRM2             | 7.40 | 2.62E-06 | 0.0014 |
| ENST000002681381 | 7.37 | 4.97E-03 | 0.0184 |
| TNFRSF18         | 7.37 | 3.49E-03 | 0.0149 |
| LPL              | 7.35 | 2.70E-04 | 0.0044 |
| CCL20            | 7.33 | 3.19E-05 | 0.0023 |
| APOBEC3B         | 7.33 | 2.50E-05 | 0.0021 |
| ZBTB32           | 7.32 | 3.01E-05 | 0.0022 |
| HILPDA           | 7.31 | 4.92E-07 | 0.0014 |
| HIST1H3G         | 7.30 | 2.50E-06 | 0.0014 |
| TNFRSF8          | 7.27 | 5.98E-04 | 0.0060 |
| KIF20A           | 7.27 | 1.41E-05 | 0.0018 |
| CDCA5            | 7.26 | 6.08E-06 | 0.0016 |
| DLGAP5           | 7.26 | 1.79E-06 | 0.0014 |
| ENST000003435280 | 7.24 | 3.92E-03 | 0.0160 |
| MCM10            | 7.24 | 2.20E-05 | 0.0020 |
| ENST000002721980 | 7.21 | 4.19E-05 | 0.0024 |
| IL21             | 7.10 | 1.44E-03 | 0.0092 |
| ENST000002613770 | 7.06 | 3.40E-03 | 0.0147 |
| ENST000002954971 | 7.03 | 5.50E-04 | 0.0058 |
| LINC01281        | 7.02 | 1.92E-06 | 0.0014 |
| DSCC1            | 7.02 | 4.07E-05 | 0.0024 |
| ENST000003298752 | 6.95 | 1.99E-02 | 0.0460 |
| BIRC5            | 6.95 | 5.31E-07 | 0.0014 |
| ENST00000409111  | 6.95 | 8.20E-05 | 0.0030 |
| OXCT2            | 6.94 | 4.63E-05 | 0.0025 |
| MND1             | 6.93 | 2.33E-06 | 0.0014 |
| GEM              | 6.93 | 4.82E-04 | 0.0055 |
| EBI3             | 6.93 | 1.25E-03 | 0.0086 |
| ENST000003051882 | 6.92 | 3.11E-05 | 0.0022 |
| ENST000002500562 | 6.92 | 4.31E-05 | 0.0024 |
| MYBL2            | 6.82 | 3.74E-05 | 0.0023 |
| FAM72D           | 6.81 | 2.67E-06 | 0.0014 |
| TMCC2            | 6.81 | 1.13E-04 | 0.0033 |
| ENST000003173681 | 6.77 | 2.89E-04 | 0.0045 |
| CAVIN3           | 6.76 | 5.76E-06 | 0.0016 |
| ENST000002868351 | 6.76 | 9.02E-05 | 0.0031 |
| AK4P1            | 6.76 | 8.93E-06 | 0.0016 |

|                  |      |          |        |
|------------------|------|----------|--------|
| MFSD2A           | 6.74 | 8.26E-05 | 0.0030 |
| HMSD             | 6.73 | 1.35E-04 | 0.0035 |
| TMPOP2           | 6.72 | 6.53E-05 | 0.0029 |
| ENST000002269510 | 6.71 | 4.52E-04 | 0.0054 |
| AK4              | 6.70 | 5.56E-07 | 0.0014 |
| LAG3             | 6.69 | 1.47E-03 | 0.0093 |
| ENST000002994980 | 6.69 | 4.55E-03 | 0.0175 |
| CSF2             | 6.69 | 6.78E-05 | 0.0029 |
| PLA2G4A          | 6.68 | 8.00E-05 | 0.0030 |
| RAD54L           | 6.65 | 8.15E-06 | 0.0016 |
| TEAD4            | 6.65 | 6.26E-05 | 0.0028 |
| ECSCR            | 6.56 | 8.19E-05 | 0.0030 |
| ANGPTL4          | 6.55 | 5.03E-06 | 0.0016 |
| BATF3            | 6.55 | 2.99E-03 | 0.0137 |
| EME1             | 6.54 | 1.57E-05 | 0.0019 |
| PHEX             | 6.54 | 1.29E-04 | 0.0035 |
| C2orf72          | 6.54 | 7.98E-05 | 0.0030 |
| SLC8A3           | 6.53 | 1.66E-04 | 0.0038 |
| PTPRF            | 6.53 | 9.62E-06 | 0.0017 |
| HMMR             | 6.53 | 3.26E-05 | 0.0023 |
| IL411            | 6.51 | 1.47E-04 | 0.0036 |
| HIST1H3B         | 6.50 | 1.40E-06 | 0.0014 |
| ENST000002623153 | 6.50 | 1.07E-03 | 0.0080 |
| PDCD1            | 6.50 | 1.23E-05 | 0.0018 |
| SDC4             | 6.49 | 6.00E-04 | 0.0060 |
| TRIP13           | 6.48 | 6.41E-05 | 0.0028 |
| CLDN1            | 6.48 | 7.94E-05 | 0.0030 |
| ZACN             | 6.46 | 8.14E-05 | 0.0030 |
| ENST000002292650 | 6.45 | 1.26E-04 | 0.0035 |
| HIST2H3A         | 6.43 | 9.61E-06 | 0.0017 |
| HIST2H3C         | 6.43 | 9.61E-06 | 0.0017 |
| ENST000003283540 | 6.42 | 1.47E-02 | 0.0370 |
| KCNK5            | 6.42 | 3.07E-06 | 0.0014 |
| FAM72C           | 6.41 | 1.24E-03 | 0.0085 |
| ENST000003016341 | 6.38 | 4.22E-05 | 0.0024 |
| B4GALT2          | 6.38 | 7.78E-06 | 0.0016 |
| INSM1            | 6.38 | 8.23E-04 | 0.0070 |
| C17orf58         | 6.37 | 2.03E-04 | 0.0040 |
| ENST000003576370 | 6.37 | 1.28E-03 | 0.0087 |
| HIST1H2AB        | 6.36 | 9.70E-05 | 0.0031 |
| AIM2             | 6.34 | 2.25E-03 | 0.0117 |
| B3GNT5           | 6.34 | 6.60E-05 | 0.0029 |
| ENST000002938722 | 6.33 | 4.55E-04 | 0.0054 |
| SPRY1            | 6.30 | 3.44E-04 | 0.0048 |
| AC007283.1       | 6.30 | 1.13E-04 | 0.0033 |
| SLC41A2          | 6.29 | 1.86E-05 | 0.0020 |
| ENST000003370002 | 6.29 | 1.04E-04 | 0.0033 |
| MAOA             | 6.29 | 2.28E-03 | 0.0118 |
| GCSHP5           | 6.28 | 1.36E-04 | 0.0035 |
| HIST1H3C         | 6.28 | 1.39E-04 | 0.0036 |

|                  |      |          |        |
|------------------|------|----------|--------|
| IL1R2            | 6.26 | 2.37E-04 | 0.0042 |
| AC112777.1       | 6.26 | 1.14E-04 | 0.0033 |
| GLT1D1           | 6.26 | 2.08E-04 | 0.0040 |
| FAM71B           | 6.24 | 1.33E-04 | 0.0035 |
| CEP55            | 6.23 | 6.34E-07 | 0.0014 |
| ENST000002584943 | 6.22 | 2.53E-04 | 0.0043 |
| TNFRSF4          | 6.21 | 1.76E-04 | 0.0039 |
| ENST000002280271 | 6.21 | 2.11E-04 | 0.0041 |
| HSD11B1          | 6.21 | 7.35E-05 | 0.0029 |
| AL139300.1       | 6.20 | 1.36E-02 | 0.0352 |
| HIST1H2BM        | 6.19 | 8.38E-05 | 0.0030 |
| AC010655.2       | 6.19 | 3.84E-03 | 0.0158 |
| ERCC6L           | 6.19 | 1.99E-06 | 0.0014 |
| CCNB2            | 6.18 | 7.04E-06 | 0.0016 |
| DEPDC1           | 6.17 | 3.10E-06 | 0.0014 |
| ENST000002168400 | 6.17 | 1.99E-04 | 0.0040 |
| HIST1H3F         | 6.16 | 8.05E-06 | 0.0016 |
| KIF2C            | 6.14 | 9.87E-07 | 0.0014 |
| AC011893.1       | 6.14 | 2.96E-03 | 0.0136 |
| TEDC2            | 6.12 | 2.96E-04 | 0.0046 |
| OXCT2P1          | 6.12 | 3.08E-04 | 0.0046 |
| AL034430.1       | 6.12 | 1.14E-02 | 0.0312 |
| NTRK2            | 6.10 | 1.98E-04 | 0.0040 |
| SHF              | 6.10 | 1.10E-03 | 0.0080 |
| ENST000003282572 | 6.10 | 1.35E-02 | 0.0349 |
| AC112721.2       | 6.09 | 1.59E-03 | 0.0097 |
| LIF              | 6.09 | 5.51E-04 | 0.0058 |
| POLQ             | 6.08 | 3.71E-06 | 0.0015 |
| ENST000003120870 | 6.08 | 2.88E-04 | 0.0045 |
| ENST000002478331 | 6.05 | 7.19E-04 | 0.0065 |
| TYMS             | 6.05 | 1.47E-04 | 0.0036 |
| DTL              | 6.05 | 1.86E-05 | 0.0020 |
| CCNA2            | 6.03 | 1.12E-05 | 0.0018 |
| GNA15            | 6.02 | 1.46E-03 | 0.0093 |
| AL391832.3       | 6.01 | 3.87E-04 | 0.0050 |
| UHRF1            | 6.01 | 5.61E-06 | 0.0016 |
| ENST000002463140 | 6.01 | 3.84E-04 | 0.0050 |
| HIST1H2AJ        | 6.00 | 3.61E-05 | 0.0023 |
| ENST000002962890 | 6.00 | 7.36E-03 | 0.0234 |
| BARX1            | 5.99 | 1.65E-04 | 0.0037 |
| ENST000003578574 | 5.97 | 2.92E-04 | 0.0045 |
| ENST000003073772 | 5.97 | 5.69E-04 | 0.0059 |
| LHFPL6           | 5.96 | 2.59E-03 | 0.0127 |
| ITPKA            | 5.96 | 1.66E-04 | 0.0037 |
| SHCBP1           | 5.95 | 1.30E-05 | 0.0018 |
| ENST000003405560 | 5.94 | 6.97E-03 | 0.0228 |
| IFNG             | 5.91 | 6.86E-05 | 0.0029 |
| HIST1H1B         | 5.90 | 3.04E-06 | 0.0014 |
| ENST000002972580 | 5.90 | 1.03E-04 | 0.0033 |
| AP003472.2       | 5.90 | 3.25E-04 | 0.0047 |

|                  |      |          |        |
|------------------|------|----------|--------|
| CCNB1            | 5.89 | 2.59E-06 | 0.0014 |
| DDIAS            | 5.88 | 1.36E-04 | 0.0035 |
| HIST1H2AH        | 5.88 | 1.00E-06 | 0.0014 |
| AC010655.4       | 5.88 | 1.76E-03 | 0.0102 |
| ZNF887P          | 5.87 | 1.94E-04 | 0.0039 |
| NCAPG            | 5.87 | 8.42E-07 | 0.0014 |
| PTGFRN           | 5.84 | 5.75E-05 | 0.0028 |
| NCAPH            | 5.84 | 2.64E-04 | 0.0044 |
| FAM72A           | 5.83 | 2.47E-06 | 0.0014 |
| ENST000002611921 | 5.82 | 3.46E-03 | 0.0148 |
| HIST1H2AL        | 5.82 | 5.47E-05 | 0.0027 |
| GOLM1            | 5.82 | 2.98E-04 | 0.0046 |
| AP000424.1       | 5.82 | 3.34E-04 | 0.0047 |
| GJB2             | 5.82 | 6.87E-04 | 0.0064 |
| ENST000003791630 | 5.81 | 2.29E-04 | 0.0042 |
| TMEM200B         | 5.78 | 1.22E-03 | 0.0084 |
| ENST000003285960 | 5.78 | 1.86E-04 | 0.0039 |
| ENST000002988380 | 5.77 | 1.82E-02 | 0.0432 |
| AC114803.1       | 5.77 | 2.86E-04 | 0.0045 |
| ESPL1            | 5.77 | 2.22E-03 | 0.0117 |
| HIST1H2AI        | 5.77 | 4.22E-05 | 0.0024 |
| RNU1-120P        | 5.76 | 7.25E-04 | 0.0066 |
| AC006329.1       | 5.76 | 7.05E-03 | 0.0229 |
| E2F8             | 5.75 | 7.53E-06 | 0.0016 |
| RBFOX2           | 5.74 | 5.76E-03 | 0.0202 |
| CDC20            | 5.74 | 3.37E-03 | 0.0146 |
| ATP9A            | 5.73 | 3.29E-04 | 0.0047 |
| CASKIN1          | 5.73 | 6.26E-04 | 0.0062 |
| CALD1            | 5.71 | 1.32E-05 | 0.0018 |
| ENST000002603831 | 5.71 | 1.35E-02 | 0.0350 |
| CDK1             | 5.70 | 1.51E-06 | 0.0014 |
| AC010655.3       | 5.69 | 3.75E-04 | 0.0049 |
| LINC02156        | 5.69 | 2.81E-04 | 0.0045 |
| FAM72B           | 5.67 | 1.41E-04 | 0.0036 |
| MELK             | 5.67 | 3.05E-06 | 0.0014 |
| ENST000002790361 | 5.66 | 6.62E-03 | 0.0220 |
| MKI67            | 5.66 | 3.36E-05 | 0.0023 |
| SULF2            | 5.65 | 1.45E-04 | 0.0036 |
| AL035604.1       | 5.64 | 2.59E-04 | 0.0044 |
| ENST000002951710 | 5.64 | 2.65E-04 | 0.0044 |
| TMPRSS3          | 5.64 | 1.55E-05 | 0.0019 |
| CA2              | 5.64 | 4.65E-04 | 0.0054 |
| IQGAP3           | 5.63 | 6.59E-04 | 0.0063 |
| NCS1             | 5.63 | 2.50E-03 | 0.0124 |
| ENST000003083170 | 5.61 | 6.77E-03 | 0.0223 |
| CENPA            | 5.61 | 3.94E-06 | 0.0015 |
| F12              | 5.61 | 2.86E-04 | 0.0045 |
| ENST000002623002 | 5.59 | 4.12E-04 | 0.0051 |
| ENST000002633600 | 5.58 | 7.83E-05 | 0.0030 |
| HIST1H2BB        | 5.58 | 1.19E-05 | 0.0018 |

|                  |      |          |        |
|------------------|------|----------|--------|
| VWA1             | 5.58 | 6.41E-04 | 0.0062 |
| CDC25C           | 5.58 | 4.33E-05 | 0.0024 |
| AC084262.1       | 5.57 | 2.93E-04 | 0.0045 |
| DPCD             | 5.57 | 1.07E-03 | 0.0079 |
| KIF15            | 5.55 | 7.38E-06 | 0.0016 |
| AC084026.1       | 5.55 | 4.35E-04 | 0.0053 |
| CENPW            | 5.55 | 9.02E-06 | 0.0016 |
| GZMH             | 5.52 | 8.48E-03 | 0.0257 |
| RAD51AP1         | 5.51 | 2.45E-06 | 0.0014 |
| IGHV1-3          | 5.51 | 3.82E-03 | 0.0157 |
| STC1             | 5.50 | 1.54E-03 | 0.0096 |
| PPFIA4           | 5.50 | 3.30E-06 | 0.0015 |
| TP53I11          | 5.49 | 4.21E-04 | 0.0052 |
| HIST2H2AA3       | 5.49 | 1.03E-03 | 0.0078 |
| NEK2             | 5.48 | 4.54E-05 | 0.0025 |
| ENST000003294330 | 5.47 | 5.11E-04 | 0.0056 |
| HIST1H2BO        | 5.46 | 1.77E-04 | 0.0039 |
| AL391832.2       | 5.45 | 7.91E-05 | 0.0030 |
| QPCT             | 5.45 | 1.34E-03 | 0.0088 |
| KIFC1            | 5.43 | 5.32E-05 | 0.0027 |
| MIR155HG         | 5.43 | 2.74E-06 | 0.0014 |
| LINC01686        | 5.42 | 1.18E-03 | 0.0083 |
| ENST000003158910 | 5.42 | 1.74E-03 | 0.0102 |
| CDKN3            | 5.41 | 6.07E-04 | 0.0061 |
| CDCA8            | 5.41 | 1.19E-05 | 0.0018 |
| CDC6             | 5.41 | 7.40E-05 | 0.0029 |
| KIF23            | 5.40 | 1.20E-06 | 0.0014 |
| KIF14            | 5.40 | 4.08E-04 | 0.0051 |
| CTHRC1           | 5.37 | 4.05E-04 | 0.0051 |
| HIST1H2BJ        | 5.37 | 6.36E-06 | 0.0016 |
| GINS2            | 5.36 | 5.86E-06 | 0.0016 |
| AC006011.1       | 5.35 | 1.12E-03 | 0.0081 |
| SMIM10           | 5.35 | 8.29E-04 | 0.0071 |
| HJURP            | 5.34 | 3.57E-06 | 0.0015 |
| CXCL8            | 5.33 | 3.01E-03 | 0.0137 |
| PTMS             | 5.31 | 5.32E-04 | 0.0058 |
| TESC             | 5.30 | 9.13E-03 | 0.0269 |
| MCM2             | 5.29 | 7.25E-06 | 0.0016 |
| ENST000003094811 | 5.28 | 4.41E-04 | 0.0053 |
| MYH10            | 5.28 | 2.37E-06 | 0.0014 |
| ZNF697           | 5.28 | 3.53E-03 | 0.0150 |
| STC2             | 5.27 | 9.36E-03 | 0.0273 |
| TOP2A            | 5.27 | 1.51E-06 | 0.0014 |
| EVI5             | 5.26 | 6.85E-05 | 0.0029 |
| RECQL4           | 5.25 | 2.30E-05 | 0.0020 |
| CDCA2            | 5.24 | 3.03E-05 | 0.0022 |
| ZWINT            | 5.22 | 3.40E-04 | 0.0048 |
| AP002852.1       | 5.21 | 1.05E-05 | 0.0017 |
| FRMD5            | 5.21 | 8.75E-04 | 0.0072 |
| RF00017.13       | 5.20 | 7.09E-05 | 0.0029 |

|                  |      |          |        |
|------------------|------|----------|--------|
| RF00017.14       | 5.20 | 7.09E-05 | 0.0029 |
| RF00017.21       | 5.20 | 7.09E-05 | 0.0029 |
| RF00017.22       | 5.20 | 7.09E-05 | 0.0029 |
| RN7SL471P        | 5.20 | 7.09E-05 | 0.0029 |
| ENST00000537344  | 5.19 | 1.89E-03 | 0.0106 |
| TTK              | 5.19 | 2.24E-05 | 0.0020 |
| AUNIP            | 5.19 | 3.63E-05 | 0.0023 |
| NAMPTP1          | 5.18 | 5.41E-04 | 0.0058 |
| ANK2             | 5.17 | 1.76E-04 | 0.0039 |
| RNVU1-6          | 5.17 | 7.73E-05 | 0.0030 |
| RXRA             | 5.17 | 3.94E-04 | 0.0050 |
| ZNF704           | 5.17 | 2.32E-04 | 0.0042 |
| ANLN             | 5.16 | 3.67E-05 | 0.0023 |
| ENST000002846373 | 5.15 | 1.73E-03 | 0.0102 |
| P4HA2            | 5.14 | 1.99E-04 | 0.0040 |
| EPB41L4B         | 5.14 | 7.60E-04 | 0.0067 |
| HIST1H3J         | 5.14 | 1.50E-05 | 0.0019 |
| VDR              | 5.13 | 2.83E-06 | 0.0014 |
| CCND1            | 5.13 | 5.71E-03 | 0.0200 |
| CGREF1           | 5.12 | 6.75E-05 | 0.0029 |
| TROAP            | 5.12 | 4.85E-05 | 0.0026 |
| HPDL             | 5.10 | 3.99E-05 | 0.0024 |
| TRPC3            | 5.10 | 2.96E-03 | 0.0136 |
| ARG2             | 5.10 | 1.76E-04 | 0.0039 |
| RHOV             | 5.10 | 7.16E-04 | 0.0065 |
| ENST000002650561 | 5.09 | 2.43E-05 | 0.0021 |
| ENST000002998215 | 5.09 | 2.22E-02 | 0.0498 |
| AC007240.1       | 5.09 | 2.69E-04 | 0.0044 |
| GSDME            | 5.09 | 2.49E-03 | 0.0124 |
| ENST000002621245 | 5.08 | 4.06E-03 | 0.0163 |
| SLC43A3          | 5.08 | 4.75E-05 | 0.0026 |
| CKAP2L           | 5.08 | 2.17E-03 | 0.0115 |
| COCH             | 5.08 | 1.29E-03 | 0.0087 |
| GGH              | 5.07 | 7.09E-06 | 0.0016 |
| CCDC74B          | 5.06 | 5.03E-03 | 0.0185 |
| FBXO43           | 5.05 | 2.99E-05 | 0.0022 |
| SEMA7A           | 5.05 | 1.08E-04 | 0.0033 |
| FAM81A           | 5.05 | 1.08E-03 | 0.0080 |
| ORC1             | 5.05 | 2.33E-06 | 0.0014 |
| ENST000002572610 | 5.04 | 1.55E-02 | 0.0384 |
| ICAM5            | 5.04 | 1.10E-03 | 0.0080 |
| ENST000002875980 | 5.04 | 1.71E-05 | 0.0020 |
| LMNA             | 5.04 | 5.31E-04 | 0.0058 |
| LINC02389        | 5.03 | 7.12E-04 | 0.0065 |
| AURKA            | 5.03 | 3.38E-06 | 0.0015 |
| SLAMF7           | 5.01 | 5.91E-05 | 0.0028 |
| SLC45A3          | 5.00 | 8.03E-04 | 0.0070 |
| ENST000002436620 | 4.99 | 6.45E-05 | 0.0028 |
| IL23R            | 4.98 | 1.36E-05 | 0.0018 |
| MIR210HG         | 4.97 | 2.99E-04 | 0.0046 |

|                  |      |          |        |
|------------------|------|----------|--------|
| SORD2P           | 4.96 | 6.29E-04 | 0.0062 |
| ENST000003408481 | 4.95 | 8.37E-04 | 0.0071 |
| RNU1-122P        | 4.95 | 8.80E-03 | 0.0263 |
| ENST000003004030 | 4.94 | 1.70E-05 | 0.0020 |
| AKAP12           | 4.94 | 2.02E-03 | 0.0110 |
| CDC25A           | 4.94 | 2.42E-05 | 0.0021 |
| DUPD1            | 4.93 | 7.65E-04 | 0.0068 |
| FTH1P22          | 4.92 | 1.88E-05 | 0.0020 |
| MAK              | 4.92 | 1.83E-03 | 0.0104 |
| KIF24            | 4.92 | 2.23E-05 | 0.0020 |
| PPP1R26          | 4.91 | 1.51E-03 | 0.0094 |
| RNU2-63P         | 4.91 | 1.18E-04 | 0.0034 |
| AP000919.2       | 4.90 | 8.47E-04 | 0.0071 |
| ENST000002680491 | 4.90 | 1.81E-02 | 0.0428 |
| ZNF860           | 4.90 | 1.06E-03 | 0.0079 |
| KIF4A            | 4.89 | 6.29E-06 | 0.0016 |
| JPH1             | 4.89 | 1.36E-03 | 0.0089 |
| DPYSL4           | 4.88 | 7.76E-04 | 0.0068 |
| LINC00475        | 4.88 | 1.31E-03 | 0.0087 |
| CLSPN            | 4.88 | 5.54E-06 | 0.0016 |
| TNFRSF9          | 4.88 | 1.76E-04 | 0.0039 |
| FOS              | 4.87 | 1.12E-03 | 0.0081 |
| SLC16A9          | 4.87 | 1.54E-03 | 0.0095 |
| NAMPT            | 4.87 | 5.19E-06 | 0.0016 |
| PLTP             | 4.87 | 1.22E-03 | 0.0084 |
| DIAPH3           | 4.87 | 1.49E-04 | 0.0036 |
| PCLAF            | 4.87 | 1.06E-05 | 0.0017 |
| GPR176           | 4.86 | 8.75E-04 | 0.0072 |
| SKA1             | 4.86 | 2.08E-05 | 0.0020 |
| CA9              | 4.86 | 8.84E-04 | 0.0073 |
| FOSL1            | 4.86 | 8.70E-04 | 0.0072 |
| MIR5087          | 4.86 | 5.98E-03 | 0.0206 |
| POC1A            | 4.86 | 1.04E-04 | 0.0033 |
| MELTF            | 4.85 | 1.88E-03 | 0.0106 |
| PROC             | 4.85 | 1.32E-03 | 0.0088 |
| VAV2             | 4.84 | 6.76E-04 | 0.0064 |
| CLEC17A          | 4.84 | 1.19E-04 | 0.0034 |
| FASLG            | 4.84 | 1.03E-03 | 0.0078 |
| UBXN10           | 4.83 | 1.01E-03 | 0.0078 |
| NT5DC2           | 4.82 | 2.42E-04 | 0.0042 |
| CD200            | 4.81 | 4.12E-04 | 0.0051 |
| CENPU            | 4.81 | 5.79E-05 | 0.0028 |
| SIPA1L2          | 4.81 | 2.33E-05 | 0.0021 |
| DEPDC1B          | 4.80 | 4.63E-06 | 0.0016 |
| NR4A1            | 4.80 | 1.49E-02 | 0.0373 |
| SPC24            | 4.80 | 4.05E-06 | 0.0016 |
| ENST000003092760 | 4.79 | 1.04E-03 | 0.0078 |
| IL5              | 4.79 | 1.04E-03 | 0.0078 |
| CDCA3            | 4.78 | 9.68E-05 | 0.0031 |
| GSTA4            | 4.78 | 5.16E-04 | 0.0057 |

|                  |      |          |        |
|------------------|------|----------|--------|
| TUBA1B           | 4.76 | 1.98E-06 | 0.0014 |
| HASPIN           | 4.76 | 6.28E-06 | 0.0016 |
| FSCN1            | 4.75 | 7.87E-05 | 0.0030 |
| BEND5            | 4.74 | 1.37E-04 | 0.0035 |
| DUSP4            | 4.74 | 3.96E-04 | 0.0051 |
| AL021578.1       | 4.74 | 1.01E-03 | 0.0078 |
| AC068446.2       | 4.74 | 1.07E-03 | 0.0080 |
| CAMKV            | 4.74 | 1.07E-03 | 0.0080 |
| DUSP2            | 4.73 | 1.75E-05 | 0.0020 |
| TK1              | 4.72 | 3.68E-03 | 0.0154 |
| EPOP             | 4.72 | 3.15E-04 | 0.0046 |
| ASF1B            | 4.71 | 2.65E-04 | 0.0044 |
| OSBPL10          | 4.71 | 1.50E-04 | 0.0036 |
| ABCA1            | 4.71 | 7.33E-03 | 0.0234 |
| ANGPTL6          | 4.71 | 3.26E-05 | 0.0023 |
| IER3             | 4.70 | 6.91E-06 | 0.0016 |
| AL645608.8       | 4.70 | 1.29E-03 | 0.0087 |
| SLC28A3          | 4.70 | 1.29E-03 | 0.0087 |
| TNFSF11          | 4.69 | 2.19E-04 | 0.0041 |
| NTRK1            | 4.69 | 1.92E-03 | 0.0107 |
| WNT10A           | 4.68 | 1.67E-02 | 0.0405 |
| CTNNAL1          | 4.68 | 2.40E-05 | 0.0021 |
| B4GALT6          | 4.68 | 5.61E-04 | 0.0059 |
| EGR3             | 4.67 | 2.70E-03 | 0.0130 |
| GNG12            | 4.67 | 1.14E-03 | 0.0082 |
| HIST1H1T         | 4.67 | 1.14E-03 | 0.0082 |
| ZNF560           | 4.67 | 1.14E-03 | 0.0082 |
| JADE3            | 4.66 | 9.76E-05 | 0.0031 |
| AL031846.1       | 4.65 | 1.51E-03 | 0.0094 |
| CD9              | 4.65 | 4.34E-05 | 0.0024 |
| LOXL3            | 4.64 | 2.26E-04 | 0.0041 |
| CABLES1          | 4.64 | 1.74E-04 | 0.0038 |
| FGF2             | 4.63 | 4.88E-04 | 0.0055 |
| DNAJC12          | 4.63 | 1.13E-04 | 0.0033 |
| ENST000003461410 | 4.63 | 1.45E-02 | 0.0368 |
| LINC01480        | 4.62 | 4.50E-05 | 0.0025 |
| BRCA1            | 4.60 | 2.58E-06 | 0.0014 |
| KNL1             | 4.60 | 5.28E-06 | 0.0016 |
| UACA             | 4.59 | 3.38E-04 | 0.0048 |
| CDK14            | 4.59 | 3.82E-03 | 0.0157 |
| CAMK1            | 4.59 | 5.58E-06 | 0.0016 |
| ENST000003024500 | 4.59 | 2.30E-05 | 0.0020 |
| DOCK1            | 4.59 | 6.93E-03 | 0.0227 |
| PIF1             | 4.59 | 6.68E-06 | 0.0016 |
| ENST000002997985 | 4.58 | 1.36E-03 | 0.0089 |
| KIAA1211         | 4.58 | 1.36E-03 | 0.0089 |
| SPHK1            | 4.58 | 6.64E-04 | 0.0063 |
| C16orf45         | 4.57 | 2.76E-04 | 0.0044 |
| PHKA1            | 4.57 | 9.80E-04 | 0.0077 |
| HDC              | 4.56 | 2.98E-04 | 0.0046 |

|                  |      |          |        |
|------------------|------|----------|--------|
| AP001189.5       | 4.56 | 1.43E-02 | 0.0363 |
| C4orf47          | 4.54 | 5.49E-04 | 0.0058 |
| AC007032.1       | 4.54 | 1.12E-02 | 0.0308 |
| HIST1H4I         | 4.54 | 7.22E-06 | 0.0016 |
| HIST1H2BL        | 4.54 | 1.05E-05 | 0.0017 |
| RNVU1-4          | 4.54 | 2.58E-03 | 0.0127 |
| RF00003.22       | 4.53 | 3.74E-05 | 0.0023 |
| NEK6             | 4.53 | 2.47E-03 | 0.0124 |
| FOXP4-AS1        | 4.53 | 1.42E-03 | 0.0091 |
| HIST1H1A         | 4.52 | 8.55E-05 | 0.0030 |
| ENST000003020031 | 4.52 | 1.20E-02 | 0.0322 |
| DDIT4            | 4.52 | 2.73E-04 | 0.0044 |
| ASPM             | 4.52 | 4.64E-05 | 0.0025 |
| CENPS-CORT       | 4.51 | 1.01E-02 | 0.0288 |
| LINC00877        | 4.51 | 1.01E-02 | 0.0288 |
| SNORA21B         | 4.51 | 1.45E-03 | 0.0093 |
| ENST000003364301 | 4.51 | 1.70E-02 | 0.0411 |
| ENST000002909430 | 4.50 | 3.86E-03 | 0.0158 |
| ENST000002840060 | 4.50 | 1.09E-02 | 0.0303 |
| HIST2H4A         | 4.49 | 2.30E-06 | 0.0014 |
| HIST1H4A         | 4.49 | 8.06E-06 | 0.0016 |
| CKB              | 4.48 | 2.57E-04 | 0.0043 |
| RGS16            | 4.48 | 2.45E-03 | 0.0123 |
| NUF2             | 4.47 | 2.91E-06 | 0.0014 |
| AL445524.1       | 4.46 | 6.26E-04 | 0.0062 |
| SPC25            | 4.46 | 2.61E-05 | 0.0021 |
| ENST000003107751 | 4.44 | 2.21E-04 | 0.0041 |
| ENST000003352091 | 4.44 | 1.39E-05 | 0.0018 |
| RIMKLA           | 4.43 | 1.22E-05 | 0.0018 |
| HIST3H2BA        | 4.43 | 2.43E-04 | 0.0042 |
| ERICD            | 4.42 | 5.52E-03 | 0.0196 |
| WASF1            | 4.41 | 1.07E-03 | 0.0080 |
| AP000781.2       | 4.40 | 4.32E-03 | 0.0169 |
| AC004816.1       | 4.40 | 8.78E-03 | 0.0263 |
| SNORA24          | 4.40 | 2.49E-03 | 0.0124 |
| SPAG5            | 4.38 | 6.15E-06 | 0.0016 |
| SMC1B            | 4.38 | 3.89E-03 | 0.0159 |
| SPAG1            | 4.37 | 1.06E-03 | 0.0079 |
| RNVU1-3          | 4.37 | 3.62E-04 | 0.0049 |
| LDHA             | 4.37 | 3.09E-06 | 0.0014 |
| TFRC             | 4.36 | 1.33E-05 | 0.0018 |
| CENPI            | 4.35 | 4.11E-05 | 0.0024 |
| ARHGEF39         | 4.35 | 3.57E-05 | 0.0023 |
| AC116366.2       | 4.35 | 2.51E-03 | 0.0125 |
| PFKFB4           | 4.34 | 8.65E-05 | 0.0030 |
| ENST000003228861 | 4.34 | 5.50E-05 | 0.0027 |
| TMPRSS6          | 4.33 | 8.16E-05 | 0.0030 |
| MPZL2            | 4.33 | 1.33E-05 | 0.0018 |
| UNC13B           | 4.33 | 2.13E-03 | 0.0114 |
| CPM              | 4.33 | 3.95E-04 | 0.0050 |

|                  |      |          |        |
|------------------|------|----------|--------|
| PTTG1            | 4.32 | 1.97E-05 | 0.0020 |
| RF00012.19       | 4.32 | 1.88E-04 | 0.0039 |
| ENST000002214130 | 4.32 | 1.01E-03 | 0.0078 |
| NME1-NME2        | 4.32 | 9.22E-04 | 0.0075 |
| ENST000003476170 | 4.31 | 8.28E-03 | 0.0253 |
| MPP2             | 4.31 | 4.19E-03 | 0.0166 |
| RNU1-72P         | 4.31 | 2.37E-03 | 0.0121 |
| CU633904.1       | 4.31 | 1.48E-04 | 0.0036 |
| LINC01132        | 4.30 | 1.13E-03 | 0.0081 |
| RIBC2            | 4.30 | 3.49E-04 | 0.0048 |
| AL357992.1       | 4.29 | 7.82E-04 | 0.0069 |
| B4GALNT1         | 4.29 | 5.15E-04 | 0.0057 |
| ENST000002902770 | 4.28 | 1.91E-02 | 0.0447 |
| RAD51            | 4.28 | 1.60E-05 | 0.0019 |
| RPL39L           | 4.27 | 8.77E-05 | 0.0031 |
| RNU1-130P        | 4.27 | 6.47E-03 | 0.0217 |
| LTA              | 4.27 | 3.08E-05 | 0.0022 |
| CENPF            | 4.26 | 2.55E-05 | 0.0021 |
| SYNGR3           | 4.26 | 3.42E-04 | 0.0048 |
| FANCL            | 4.25 | 1.27E-05 | 0.0018 |
| JAM3             | 4.22 | 1.10E-04 | 0.0033 |
| SCCPDH           | 4.22 | 7.22E-05 | 0.0029 |
| CKS2             | 4.22 | 3.93E-06 | 0.0015 |
| TP53I3           | 4.22 | 2.32E-04 | 0.0042 |
| SCD              | 4.21 | 3.59E-05 | 0.0023 |
| ENST000003351830 | 4.20 | 1.63E-05 | 0.0019 |
| LAMB3            | 4.19 | 5.39E-04 | 0.0058 |
| FEN1             | 4.19 | 8.67E-06 | 0.0016 |
| ANKRD37          | 4.18 | 2.54E-05 | 0.0021 |
| SPAG4            | 4.18 | 3.33E-03 | 0.0145 |
| CCDC150          | 4.17 | 2.46E-05 | 0.0021 |
| ENST00000567345  | 4.17 | 2.11E-02 | 0.0481 |
| COL6A3           | 4.17 | 4.32E-03 | 0.0169 |
| SNORD3B-1        | 4.16 | 3.67E-03 | 0.0153 |
| GTSE1            | 4.16 | 1.66E-05 | 0.0019 |
| CIT              | 4.15 | 9.03E-06 | 0.0016 |
| E2F7             | 4.15 | 1.15E-03 | 0.0082 |
| COLGALT2         | 4.14 | 1.31E-03 | 0.0087 |
| ITPRIPL2         | 4.14 | 4.96E-04 | 0.0056 |
| CENPM            | 4.14 | 1.74E-04 | 0.0038 |
| FAM131B          | 4.14 | 8.26E-03 | 0.0253 |
| EMP1             | 4.13 | 2.08E-03 | 0.0112 |
| ENST000002606052 | 4.13 | 5.14E-03 | 0.0188 |
| SPTBN4           | 4.13 | 7.54E-03 | 0.0238 |
| CRIM1            | 4.12 | 6.83E-04 | 0.0064 |
| TYMSOS           | 4.12 | 9.83E-03 | 0.0283 |
| ENST000003132852 | 4.12 | 1.14E-05 | 0.0018 |
| RTKN             | 4.11 | 1.77E-02 | 0.0422 |
| ETV4             | 4.11 | 4.51E-04 | 0.0054 |
| EGR1             | 4.10 | 8.40E-04 | 0.0071 |

|                  |      |          |        |
|------------------|------|----------|--------|
| DYRK3            | 4.10 | 9.08E-05 | 0.0031 |
| HSD11B1-AS1      | 4.10 | 1.20E-04 | 0.0034 |
| AC099552.1       | 4.10 | 2.70E-03 | 0.0130 |
| NDRG4            | 4.08 | 1.73E-03 | 0.0102 |
| CKS1B            | 4.08 | 5.48E-06 | 0.0016 |
| COX20P2          | 4.07 | 1.12E-02 | 0.0309 |
| SKA3             | 4.05 | 5.36E-06 | 0.0016 |
| IL13             | 4.05 | 7.58E-03 | 0.0239 |
| CHRNA6           | 4.05 | 2.43E-03 | 0.0123 |
| FLT1             | 4.05 | 8.31E-04 | 0.0071 |
| ESCO2            | 4.04 | 6.45E-05 | 0.0028 |
| NKG7             | 4.03 | 7.42E-03 | 0.0236 |
| PARD3            | 4.02 | 5.82E-04 | 0.0060 |
| CU633906.1       | 4.02 | 1.64E-04 | 0.0037 |
| RAC3             | 4.01 | 1.25E-02 | 0.0332 |
| PKMYT1           | 4.01 | 8.46E-05 | 0.0030 |
| ARFGEF3          | 4.00 | 2.18E-05 | 0.0020 |
| FAM111B          | 3.98 | 7.81E-06 | 0.0016 |
| SLC29A1          | 3.98 | 4.27E-04 | 0.0052 |
| AC084026.2       | 3.98 | 3.66E-03 | 0.0153 |
| BUB1B            | 3.98 | 1.09E-02 | 0.0302 |
| C17orf53         | 3.98 | 3.36E-04 | 0.0047 |
| TPI1             | 3.97 | 1.19E-05 | 0.0018 |
| PGAM1            | 3.97 | 1.00E-05 | 0.0017 |
| DNAH11           | 3.97 | 1.28E-05 | 0.0018 |
| IGFBP2           | 3.97 | 1.42E-03 | 0.0091 |
| FZD5             | 3.97 | 1.17E-03 | 0.0083 |
| HIST1H4L         | 3.96 | 2.56E-05 | 0.0021 |
| POLE2            | 3.96 | 5.37E-05 | 0.0027 |
| ENST000003027590 | 3.96 | 1.55E-03 | 0.0096 |
| MCM4             | 3.95 | 6.00E-06 | 0.0016 |
| GOLIM4           | 3.95 | 3.01E-03 | 0.0137 |
| LGALS1           | 3.95 | 5.88E-05 | 0.0028 |
| PIH1D2           | 3.94 | 5.93E-03 | 0.0205 |
| SMS              | 3.94 | 8.79E-05 | 0.0031 |
| SRD5A3           | 3.94 | 1.20E-03 | 0.0084 |
| CCNE2            | 3.94 | 8.72E-06 | 0.0016 |
| RF00003.25       | 3.92 | 1.93E-03 | 0.0107 |
| CU634019.1       | 3.92 | 1.78E-04 | 0.0039 |
| GINS4            | 3.92 | 4.49E-04 | 0.0053 |
| HIST1H2BF        | 3.91 | 1.83E-04 | 0.0039 |
| TRIB1            | 3.91 | 1.80E-05 | 0.0020 |
| PLK4             | 3.91 | 6.71E-06 | 0.0016 |
| HIST1H2BI        | 3.91 | 3.55E-05 | 0.0023 |
| PRR5L            | 3.91 | 1.37E-04 | 0.0035 |
| CENPN            | 3.91 | 1.24E-05 | 0.0018 |
| HIST1H2BK        | 3.90 | 4.98E-06 | 0.0016 |
| EPDR1            | 3.90 | 8.35E-03 | 0.0254 |
| ENST000003423860 | 3.90 | 7.64E-04 | 0.0068 |
| DUSP6            | 3.90 | 1.79E-03 | 0.0103 |

|                  |      |          |        |
|------------------|------|----------|--------|
| GAPDH            | 3.90 | 3.90E-06 | 0.0015 |
| MED12L           | 3.89 | 1.37E-03 | 0.0089 |
| HIST1H2BE        | 3.89 | 5.32E-05 | 0.0027 |
| PRR11            | 3.89 | 4.63E-05 | 0.0025 |
| HIST2H3D         | 3.89 | 1.72E-05 | 0.0020 |
| AURKB            | 3.88 | 1.40E-05 | 0.0018 |
| ENST000002703011 | 3.88 | 9.25E-04 | 0.0075 |
| CDT1             | 3.87 | 8.90E-04 | 0.0073 |
| UNQ6494          | 3.87 | 1.60E-04 | 0.0037 |
| SAPCD2           | 3.85 | 2.53E-05 | 0.0021 |
| TUBB             | 3.85 | 7.01E-06 | 0.0016 |
| ENST000001894440 | 3.84 | 2.97E-03 | 0.0136 |
| LINC01943        | 3.84 | 1.83E-03 | 0.0104 |
| TBX21            | 3.83 | 1.94E-05 | 0.0020 |
| OSCP1            | 3.83 | 5.86E-03 | 0.0204 |
| ENST000002603590 | 3.83 | 9.51E-05 | 0.0031 |
| WDR34            | 3.83 | 1.73E-04 | 0.0038 |
| AZIN1-AS1        | 3.83 | 1.48E-04 | 0.0036 |
| GINS1            | 3.83 | 2.11E-05 | 0.0020 |
| PHLDA1           | 3.82 | 4.64E-04 | 0.0054 |
| H2AFX            | 3.82 | 1.28E-04 | 0.0035 |
| PACSIN3          | 3.82 | 9.85E-04 | 0.0077 |
| IRF4             | 3.81 | 2.73E-05 | 0.0021 |
| STRIP2           | 3.81 | 2.03E-04 | 0.0040 |
| SLC8A1           | 3.81 | 1.37E-04 | 0.0035 |
| KIF11            | 3.81 | 5.47E-06 | 0.0016 |
| HIST1H2AM        | 3.81 | 2.20E-05 | 0.0020 |
| VLDLR            | 3.81 | 1.52E-04 | 0.0036 |
| PLEKHA7          | 3.80 | 4.80E-03 | 0.0180 |
| SERPINE2         | 3.80 | 1.11E-02 | 0.0306 |
| ENST000003278922 | 3.80 | 2.58E-03 | 0.0126 |
| GINS3            | 3.80 | 8.43E-05 | 0.0030 |
| RNU5E-6P         | 3.80 | 7.97E-05 | 0.0030 |
| CENPH            | 3.80 | 2.51E-04 | 0.0043 |
| POLR3G           | 3.80 | 1.06E-04 | 0.0033 |
| SLC25A10         | 3.79 | 3.26E-03 | 0.0143 |
| CU639417.1       | 3.79 | 1.35E-05 | 0.0018 |
| H2BFS            | 3.79 | 1.35E-05 | 0.0018 |
| CORO1C           | 3.78 | 1.12E-03 | 0.0081 |
| HIST1H2AE        | 3.78 | 1.85E-05 | 0.0020 |
| ADPRH            | 3.77 | 2.26E-04 | 0.0041 |
| EIF4EP2          | 3.77 | 2.39E-03 | 0.0122 |
| RFC3             | 3.77 | 8.40E-06 | 0.0016 |
| HIST1H3A         | 3.76 | 1.24E-05 | 0.0018 |
| HIST1H3D         | 3.76 | 1.18E-02 | 0.0320 |
| UBE2T            | 3.75 | 1.54E-05 | 0.0019 |
| HIST1H4C         | 3.75 | 4.98E-06 | 0.0016 |
| AP001453.3       | 3.75 | 1.31E-02 | 0.0341 |
| ZC3H12C          | 3.74 | 1.37E-03 | 0.0089 |
| TEAD1            | 3.74 | 4.59E-03 | 0.0176 |

|                  |      |          |        |
|------------------|------|----------|--------|
| CD83             | 3.74 | 3.74E-03 | 0.0155 |
| FAM234B          | 3.73 | 4.21E-04 | 0.0052 |
| TUBA1C           | 3.73 | 6.44E-06 | 0.0016 |
| CLECL1           | 3.72 | 7.82E-04 | 0.0069 |
| CXCR5            | 3.71 | 1.60E-02 | 0.0394 |
| ENST000003509971 | 3.71 | 6.30E-04 | 0.0062 |
| C2CD4D-AS1       | 3.71 | 1.48E-04 | 0.0036 |
| NEFH             | 3.71 | 5.48E-05 | 0.0027 |
| KIF18B           | 3.70 | 1.94E-03 | 0.0107 |
| PVR              | 3.70 | 2.69E-04 | 0.0044 |
| STMN1            | 3.70 | 2.17E-05 | 0.0020 |
| AC051619.8       | 3.70 | 1.16E-04 | 0.0034 |
| TMEM273          | 3.69 | 2.72E-05 | 0.0021 |
| ENST000003195182 | 3.69 | 1.09E-02 | 0.0302 |
| HOPX             | 3.69 | 4.51E-03 | 0.0174 |
| CFAP58           | 3.69 | 2.34E-03 | 0.0120 |
| PSMC3IP          | 3.69 | 9.75E-05 | 0.0031 |
| ENST000002632741 | 3.68 | 1.64E-05 | 0.0019 |
| TPI1P1           | 3.68 | 1.85E-03 | 0.0105 |
| TUBBP1           | 3.67 | 1.20E-02 | 0.0324 |
| PIP5K1B          | 3.67 | 1.48E-03 | 0.0093 |
| KCNN4            | 3.67 | 1.41E-05 | 0.0018 |
| CHEK1            | 3.67 | 6.61E-06 | 0.0016 |
| LINC01679        | 3.66 | 6.72E-04 | 0.0064 |
| HIST1H4D         | 3.66 | 5.38E-06 | 0.0016 |
| WDHD1            | 3.66 | 6.15E-06 | 0.0016 |
| C15orf48         | 3.66 | 1.19E-03 | 0.0083 |
| CDR2L            | 3.66 | 1.12E-02 | 0.0308 |
| CYP27B1          | 3.65 | 6.73E-04 | 0.0064 |
| PAICS            | 3.65 | 1.04E-05 | 0.0017 |
| LGALSL           | 3.65 | 7.75E-05 | 0.0030 |
| ARHGEF37         | 3.65 | 2.63E-03 | 0.0128 |
| ADGRA3           | 3.64 | 1.84E-05 | 0.0020 |
| DBN1             | 3.64 | 2.90E-03 | 0.0135 |
| ENST000003285141 | 3.63 | 1.40E-02 | 0.0357 |
| HIST1H2AG        | 3.63 | 5.86E-05 | 0.0028 |
| UBE2S            | 3.62 | 5.84E-05 | 0.0028 |
| MAD2L1           | 3.62 | 1.48E-05 | 0.0019 |
| CYP51A1          | 3.62 | 1.05E-03 | 0.0079 |
| UCK2             | 3.60 | 1.00E-04 | 0.0032 |
| NCAPG2           | 3.59 | 3.58E-04 | 0.0049 |
| HIST1H2BH        | 3.59 | 5.10E-05 | 0.0027 |
| GCK              | 3.59 | 1.52E-02 | 0.0379 |
| CENPS            | 3.59 | 1.05E-04 | 0.0033 |
| ZNF695           | 3.59 | 1.13E-03 | 0.0081 |
| FANCA            | 3.59 | 1.29E-04 | 0.0035 |
| CHST10           | 3.58 | 1.56E-03 | 0.0096 |
| HIST1H3H         | 3.57 | 3.35E-05 | 0.0023 |
| SNORA51          | 3.57 | 1.47E-03 | 0.0093 |
| IRF5             | 3.57 | 3.35E-04 | 0.0047 |

|                  |      |          |        |
|------------------|------|----------|--------|
| AC254633.1       | 3.57 | 1.74E-03 | 0.0102 |
| NRN1             | 3.57 | 1.18E-03 | 0.0083 |
| DUSP5            | 3.57 | 3.91E-03 | 0.0160 |
| ZNRF1            | 3.56 | 6.44E-04 | 0.0062 |
| FGF11            | 3.56 | 2.17E-05 | 0.0020 |
| ANKRD33B         | 3.56 | 3.20E-03 | 0.0142 |
| TCF19            | 3.56 | 1.12E-05 | 0.0018 |
| TNFSF14          | 3.55 | 5.99E-04 | 0.0060 |
| HMGB3            | 3.55 | 3.52E-05 | 0.0023 |
| ME3              | 3.54 | 1.33E-04 | 0.0035 |
| PRC1             | 3.54 | 7.21E-06 | 0.0016 |
| ENST000002645523 | 3.54 | 1.85E-04 | 0.0039 |
| NUSAP1           | 3.53 | 2.78E-05 | 0.0021 |
| ENST000002498060 | 3.53 | 7.89E-04 | 0.0069 |
| SGO1             | 3.53 | 7.45E-04 | 0.0067 |
| CLIC4            | 3.53 | 1.21E-02 | 0.0325 |
| PARVB            | 3.53 | 6.68E-05 | 0.0029 |
| KDEL3            | 3.52 | 4.81E-03 | 0.0180 |
| HIST2H2BF        | 3.52 | 3.37E-05 | 0.0023 |
| PGK1             | 3.51 | 2.15E-05 | 0.0020 |
| ENST000003253071 | 3.51 | 3.57E-05 | 0.0023 |
| IL12RB2          | 3.51 | 1.08E-03 | 0.0080 |
| AP000880.1       | 3.51 | 1.73E-02 | 0.0414 |
| ABHD17C          | 3.51 | 1.58E-04 | 0.0037 |
| KIF18A           | 3.50 | 8.22E-06 | 0.0016 |
| ENST000000090411 | 3.50 | 3.06E-03 | 0.0139 |
| NDFIP2           | 3.50 | 1.94E-03 | 0.0107 |
| NOL3             | 3.49 | 2.03E-03 | 0.0110 |
| Z93241.1         | 3.49 | 3.61E-03 | 0.0152 |
| ENST000003027631 | 3.49 | 7.15E-05 | 0.0029 |
| LRP2             | 3.49 | 1.35E-02 | 0.0349 |
| FABP5            | 3.48 | 4.85E-03 | 0.0181 |
| ENST000003023620 | 3.48 | 1.23E-04 | 0.0034 |
| MTFR2            | 3.48 | 3.08E-05 | 0.0022 |
| VTRNA1-3         | 3.48 | 1.32E-03 | 0.0087 |
| TRAIP            | 3.48 | 5.59E-04 | 0.0059 |
| RF00003.28       | 3.48 | 1.88E-03 | 0.0106 |
| RF00003.34       | 3.48 | 1.88E-03 | 0.0106 |
| AC103591.3       | 3.46 | 1.28E-02 | 0.0336 |
| LINC00881        | 3.46 | 2.42E-03 | 0.0122 |
| HIST1H2AD        | 3.45 | 9.22E-05 | 0.0031 |
| HOMER1           | 3.45 | 4.05E-04 | 0.0051 |
| ID2              | 3.44 | 5.36E-04 | 0.0058 |
| KRT7             | 3.44 | 1.53E-03 | 0.0095 |
| MT-TP            | 3.44 | 5.16E-03 | 0.0188 |
| NME1             | 3.44 | 3.05E-05 | 0.0022 |
| ATAD5            | 3.44 | 4.31E-05 | 0.0024 |
| SNORA74D         | 3.44 | 1.20E-04 | 0.0034 |
| ENST000003615720 | 3.44 | 1.28E-03 | 0.0086 |
| N4BP3            | 3.43 | 5.75E-04 | 0.0060 |

|                  |      |          |        |
|------------------|------|----------|--------|
| NPM3             | 3.43 | 5.92E-05 | 0.0028 |
| BLM              | 3.43 | 2.50E-05 | 0.0021 |
| LONP1            | 3.43 | 8.40E-06 | 0.0016 |
| TNFSF9           | 3.43 | 4.84E-03 | 0.0181 |
| LINC01353        | 3.42 | 1.79E-02 | 0.0425 |
| ENST000003549190 | 3.42 | 9.38E-05 | 0.0031 |
| LINC00892        | 3.42 | 4.55E-04 | 0.0054 |
| ENST000002218560 | 3.42 | 4.68E-04 | 0.0054 |
| CTLA4            | 3.41 | 7.48E-06 | 0.0016 |
| FAM57A           | 3.40 | 1.65E-03 | 0.0099 |
| MUC1             | 3.40 | 2.04E-03 | 0.0110 |
| SPRED1           | 3.40 | 9.16E-04 | 0.0074 |
| PIK3AP1          | 3.40 | 2.62E-03 | 0.0128 |
| ATF3             | 3.39 | 1.27E-03 | 0.0086 |
| ENST000003299620 | 3.39 | 1.10E-03 | 0.0080 |
| LAYN             | 3.39 | 1.24E-02 | 0.0330 |
| AC093512.2       | 3.39 | 2.07E-03 | 0.0111 |
| MID1             | 3.38 | 2.11E-03 | 0.0113 |
| RAD54B           | 3.38 | 2.08E-05 | 0.0020 |
| NETO2            | 3.38 | 1.85E-03 | 0.0105 |
| AP002414.2       | 3.38 | 5.26E-03 | 0.0190 |
| AC004069.1       | 3.38 | 2.75E-03 | 0.0131 |
| PLK2             | 3.38 | 3.44E-04 | 0.0048 |
| AC092718.4       | 3.37 | 2.38E-04 | 0.0042 |
| HSPD1            | 3.37 | 1.75E-05 | 0.0020 |
| IL18RAP          | 3.37 | 1.54E-04 | 0.0036 |
| ENST000002863981 | 3.37 | 1.59E-03 | 0.0097 |
| RF00003.31       | 3.37 | 3.06E-04 | 0.0046 |
| PYCR1            | 3.37 | 4.04E-04 | 0.0051 |
| MIR222HG         | 3.36 | 1.68E-04 | 0.0038 |
| HIST1H2BC        | 3.36 | 1.04E-05 | 0.0017 |
| MCM7             | 3.36 | 1.85E-05 | 0.0020 |
| OIP5             | 3.35 | 4.39E-05 | 0.0025 |
| MCAM             | 3.35 | 8.84E-05 | 0.0031 |
| SUV39H2          | 3.34 | 1.27E-04 | 0.0035 |
| C2orf48          | 3.34 | 7.38E-04 | 0.0066 |
| KIF9             | 3.34 | 1.23E-03 | 0.0085 |
| BNIP3            | 3.34 | 1.90E-05 | 0.0020 |
| ENST000003286970 | 3.34 | 7.67E-05 | 0.0030 |
| CCNF             | 3.34 | 4.33E-05 | 0.0024 |
| LINC02416        | 3.33 | 4.40E-04 | 0.0053 |
| RNU5E-4P         | 3.33 | 8.52E-03 | 0.0258 |
| NFIL3            | 3.33 | 4.91E-03 | 0.0183 |
| STIL             | 3.33 | 2.86E-05 | 0.0022 |
| AC135178.5       | 3.32 | 4.49E-03 | 0.0173 |
| HIST1H4J         | 3.32 | 3.77E-05 | 0.0023 |
| JAG2             | 3.32 | 7.59E-03 | 0.0239 |
| RFC5             | 3.31 | 4.12E-05 | 0.0024 |
| AC020904.2       | 3.31 | 2.45E-03 | 0.0123 |
| ERI2             | 3.31 | 1.95E-05 | 0.0020 |

|                  |      |          |        |
|------------------|------|----------|--------|
| KNSTRN           | 3.31 | 3.72E-04 | 0.0049 |
| GBE1             | 3.30 | 1.70E-05 | 0.0020 |
| ATP8B4           | 3.29 | 1.03E-02 | 0.0292 |
| KIF7             | 3.29 | 6.55E-04 | 0.0063 |
| ODC1             | 3.28 | 2.93E-04 | 0.0045 |
| CCDC58           | 3.28 | 2.61E-05 | 0.0021 |
| IL3              | 3.28 | 1.46E-02 | 0.0368 |
| ENO1             | 3.28 | 4.06E-04 | 0.0051 |
| BCAT1            | 3.28 | 2.79E-03 | 0.0132 |
| ENST000002958302 | 3.28 | 2.39E-04 | 0.0042 |
| NMB              | 3.28 | 1.91E-04 | 0.0039 |
| CPNE7            | 3.28 | 1.01E-02 | 0.0287 |
| TTC26            | 3.28 | 5.43E-04 | 0.0058 |
| UPK1A-AS1        | 3.28 | 5.86E-05 | 0.0028 |
| PALLD            | 3.27 | 5.85E-03 | 0.0204 |
| TRAF4            | 3.27 | 8.93E-05 | 0.0031 |
| ALDOA            | 3.27 | 1.00E-05 | 0.0017 |
| NUDT10           | 3.27 | 9.37E-04 | 0.0075 |
| ENST000002886703 | 3.27 | 7.71E-03 | 0.0242 |
| PLS3             | 3.26 | 1.28E-03 | 0.0086 |
| HIST1H4F         | 3.25 | 1.13E-05 | 0.0018 |
| ECT2             | 3.25 | 1.82E-04 | 0.0039 |
| ZGRF1            | 3.24 | 2.09E-05 | 0.0020 |
| SHC4             | 3.24 | 1.67E-03 | 0.0100 |
| RHEBL1           | 3.24 | 3.28E-03 | 0.0144 |
| ENST000002848112 | 3.24 | 2.36E-03 | 0.0121 |
| GK               | 3.23 | 2.63E-05 | 0.0021 |
| HIST1H2BG        | 3.23 | 3.39E-05 | 0.0023 |
| HIST2H2AB        | 3.22 | 5.26E-05 | 0.0027 |
| SH3D21           | 3.22 | 1.07E-04 | 0.0033 |
| RANBP1           | 3.21 | 1.76E-05 | 0.0020 |
| EIF4EBP1         | 3.21 | 6.79E-04 | 0.0064 |
| SLC7A5           | 3.21 | 5.96E-04 | 0.0060 |
| KPNA2            | 3.21 | 6.08E-05 | 0.0028 |
| BRCA2            | 3.21 | 5.87E-05 | 0.0028 |
| PCNA             | 3.21 | 1.00E-04 | 0.0032 |
| KCNQ5            | 3.21 | 1.06E-04 | 0.0033 |
| SLC35F2          | 3.21 | 1.33E-04 | 0.0035 |
| CENPE            | 3.19 | 9.85E-06 | 0.0017 |
| WARS             | 3.19 | 5.45E-05 | 0.0027 |
| VDAC1            | 3.19 | 9.50E-06 | 0.0017 |
| CD70             | 3.19 | 8.74E-05 | 0.0031 |
| ZNF215           | 3.19 | 1.24E-02 | 0.0330 |
| TMEM97           | 3.19 | 2.44E-04 | 0.0042 |
| MSH5-SAPCD1      | 3.19 | 6.32E-04 | 0.0062 |
| CIART            | 3.18 | 8.57E-04 | 0.0072 |
| TPRG1            | 3.18 | 2.00E-02 | 0.0462 |
| ENST000003522971 | 3.18 | 2.26E-05 | 0.0020 |
| CORO6            | 3.18 | 2.31E-04 | 0.0042 |
| CYTOR            | 3.18 | 4.96E-05 | 0.0026 |

|                  |      |          |        |
|------------------|------|----------|--------|
| SAMD15           | 3.18 | 1.21E-02 | 0.0325 |
| DHCR24           | 3.17 | 1.58E-04 | 0.0037 |
| MYL6B            | 3.17 | 4.29E-04 | 0.0052 |
| ENST000002637411 | 3.17 | 8.23E-03 | 0.0252 |
| PTCH2            | 3.17 | 5.12E-04 | 0.0056 |
| SQLE             | 3.17 | 8.85E-05 | 0.0031 |
| ENST000002541930 | 3.16 | 2.87E-04 | 0.0045 |
| CDKN1A           | 3.16 | 5.96E-04 | 0.0060 |
| TIMELESS         | 3.16 | 5.94E-05 | 0.0028 |
| SLC16A14         | 3.15 | 1.25E-03 | 0.0086 |
| PSRC1            | 3.14 | 6.13E-05 | 0.0028 |
| SGO2             | 3.14 | 9.42E-05 | 0.0031 |
| ENST000003516250 | 3.13 | 3.51E-05 | 0.0023 |
| AC234772.2       | 3.13 | 4.24E-04 | 0.0052 |
| ENST000002566860 | 3.13 | 2.73E-05 | 0.0021 |
| ST7              | 3.12 | 3.48E-04 | 0.0048 |
| BUB1             | 3.12 | 6.98E-03 | 0.0228 |
| HSPE1            | 3.11 | 2.66E-05 | 0.0021 |
| GLYATL1          | 3.11 | 1.37E-02 | 0.0353 |
| SLC16A3          | 3.10 | 2.29E-05 | 0.0020 |
| H2AFZ            | 3.10 | 2.80E-05 | 0.0021 |
| NAB2             | 3.10 | 3.23E-05 | 0.0023 |
| DBIL5P           | 3.10 | 2.00E-03 | 0.0109 |
| GLB1L2           | 3.09 | 6.15E-03 | 0.0210 |
| BATF             | 3.09 | 6.83E-04 | 0.0064 |
| H1FO             | 3.09 | 5.65E-05 | 0.0028 |
| GMNN             | 3.09 | 3.79E-05 | 0.0023 |
| HIST2H2AA4       | 3.09 | 1.72E-03 | 0.0101 |
| PMCH             | 3.09 | 3.32E-04 | 0.0047 |
| ENST000000117000 | 3.09 | 2.46E-03 | 0.0123 |
| DTYMK            | 3.08 | 1.08E-04 | 0.0033 |
| TOMM34           | 3.08 | 3.10E-05 | 0.0022 |
| EPAS1            | 3.08 | 1.11E-03 | 0.0080 |
| RPL22L1          | 3.08 | 5.19E-05 | 0.0027 |
| TLN2             | 3.08 | 6.31E-04 | 0.0062 |
| CENPV            | 3.07 | 2.63E-04 | 0.0044 |
| ARNTL2           | 3.07 | 2.16E-04 | 0.0041 |
| HELLS            | 3.07 | 1.98E-05 | 0.0020 |
| RF00494.3        | 3.07 | 3.18E-03 | 0.0141 |
| RRAS2            | 3.06 | 4.32E-04 | 0.0052 |
| AHCY             | 3.06 | 5.57E-05 | 0.0027 |
| NDC80            | 3.05 | 1.53E-05 | 0.0019 |
| ENST000002973231 | 3.05 | 1.12E-03 | 0.0081 |
| ENST000002114020 | 3.05 | 2.87E-03 | 0.0134 |
| COQ3             | 3.05 | 7.07E-05 | 0.0029 |
| SPRED2           | 3.05 | 2.39E-03 | 0.0122 |
| CCDC86           | 3.05 | 3.63E-04 | 0.0049 |
| ETV5             | 3.05 | 2.24E-03 | 0.0117 |
| NOD2             | 3.04 | 4.59E-04 | 0.0054 |
| ENST000003270350 | 3.04 | 4.12E-05 | 0.0024 |

|                  |      |          |        |
|------------------|------|----------|--------|
| HIVEP3           | 3.04 | 1.31E-04 | 0.0035 |
| CBX2             | 3.03 | 1.80E-03 | 0.0104 |
| RPA3             | 3.03 | 7.00E-05 | 0.0029 |
| EDARADD          | 3.03 | 1.19E-02 | 0.0321 |
| AL133215.2       | 3.03 | 4.78E-03 | 0.0180 |
| ENST000002860310 | 3.03 | 4.23E-03 | 0.0167 |
| ZWILCH           | 3.01 | 7.69E-05 | 0.0030 |
| ENST000002795501 | 3.01 | 5.55E-04 | 0.0059 |
| AL031777.3       | 3.01 | 9.03E-05 | 0.0031 |
| DNMT3B           | 3.01 | 3.10E-04 | 0.0046 |
| HIST1H2BD        | 3.01 | 1.45E-04 | 0.0036 |
| ANKRD18DP        | 3.00 | 6.26E-03 | 0.0212 |
| CAVIN1           | 3.00 | 1.05E-04 | 0.0033 |
| ENST000002459341 | 3.00 | 1.40E-04 | 0.0036 |
| TSPAN13          | 3.00 | 1.32E-03 | 0.0088 |
| RHOB             | 3.00 | 6.25E-04 | 0.0062 |
| PSD              | 3.00 | 4.47E-03 | 0.0173 |
| C19orf48         | 2.99 | 6.78E-05 | 0.0029 |
| ENST000002298541 | 2.98 | 2.93E-05 | 0.0022 |
| BCL2L1           | 2.98 | 1.51E-03 | 0.0094 |
| RGS3             | 2.98 | 3.32E-05 | 0.0023 |
| MIF              | 2.98 | 1.39E-05 | 0.0018 |
| ENST000002528160 | 2.98 | 7.23E-05 | 0.0029 |
| HIST1H4B         | 2.98 | 1.31E-04 | 0.0035 |
| CDC42EP4         | 2.97 | 4.94E-03 | 0.0183 |
| PLAGL2           | 2.97 | 2.53E-04 | 0.0043 |
| TRIP10           | 2.97 | 1.88E-02 | 0.0442 |
| 39692            | 2.97 | 2.49E-03 | 0.0124 |
| AGRN             | 2.97 | 1.50E-04 | 0.0036 |
| RPSAP13          | 2.97 | 1.78E-02 | 0.0425 |
| ENST000002233360 | 2.97 | 2.60E-03 | 0.0127 |
| VEGFA            | 2.96 | 1.09E-02 | 0.0303 |
| TLE6             | 2.96 | 3.06E-03 | 0.0139 |
| TBC1D12          | 2.96 | 1.07E-04 | 0.0033 |
| HIST2H2BE        | 2.96 | 3.13E-05 | 0.0022 |
| AC008074.2       | 2.95 | 9.03E-03 | 0.0267 |
| DNA2             | 2.95 | 9.73E-05 | 0.0031 |
| PIMREG           | 2.95 | 1.85E-03 | 0.0105 |
| ENST000002748910 | 2.95 | 3.53E-03 | 0.0150 |
| C4orf46          | 2.95 | 2.35E-04 | 0.0042 |
| TMPO-AS1         | 2.94 | 8.15E-05 | 0.0030 |
| MRTO4            | 2.94 | 1.36E-04 | 0.0035 |
| ENST000002965090 | 2.94 | 1.68E-05 | 0.0020 |
| PIM3             | 2.94 | 3.24E-05 | 0.0023 |
| ENST000003364521 | 2.94 | 1.85E-05 | 0.0020 |
| ENST000002657532 | 2.94 | 9.09E-04 | 0.0074 |
| MTHFD2           | 2.94 | 4.09E-04 | 0.0051 |
| RF00003.1        | 2.93 | 2.03E-03 | 0.0110 |
| CDK2AP1          | 2.93 | 2.09E-05 | 0.0020 |
| ELL2             | 2.93 | 9.39E-05 | 0.0031 |

|                  |      |          |        |
|------------------|------|----------|--------|
| BEND4            | 2.93 | 6.56E-03 | 0.0219 |
| FANCI            | 2.93 | 4.26E-04 | 0.0052 |
| AC108879.1       | 2.92 | 2.63E-03 | 0.0128 |
| SLC1A5           | 2.92 | 4.64E-04 | 0.0054 |
| IFI30            | 2.92 | 2.51E-03 | 0.0125 |
| CHAF1A           | 2.92 | 2.77E-04 | 0.0044 |
| C19orf57         | 2.92 | 1.75E-03 | 0.0102 |
| ALDH1B1          | 2.92 | 7.36E-05 | 0.0029 |
| LYAR             | 2.92 | 8.91E-05 | 0.0031 |
| ENST000002712770 | 2.91 | 8.39E-04 | 0.0071 |
| CENPO            | 2.91 | 1.88E-04 | 0.0039 |
| ENST00000580163  | 2.90 | 2.44E-03 | 0.0123 |
| PDSS1            | 2.90 | 9.50E-05 | 0.0031 |
| DCTPP1           | 2.90 | 3.66E-05 | 0.0023 |
| TUBB4B           | 2.90 | 1.54E-05 | 0.0019 |
| AL138759.1       | 2.89 | 1.86E-02 | 0.0439 |
| RAN              | 2.89 | 2.76E-05 | 0.0021 |
| FAM83D           | 2.89 | 3.36E-05 | 0.0023 |
| RNF122           | 2.89 | 1.46E-04 | 0.0036 |
| CRYBG2           | 2.89 | 1.22E-02 | 0.0326 |
| ZNF367           | 2.89 | 2.60E-05 | 0.0021 |
| FURIN            | 2.88 | 4.45E-03 | 0.0172 |
| RHPN2            | 2.88 | 2.01E-04 | 0.0040 |
| RMI2             | 2.88 | 2.43E-05 | 0.0021 |
| THOP1            | 2.88 | 3.10E-05 | 0.0022 |
| ANP32E           | 2.88 | 3.34E-05 | 0.0023 |
| FANCD2           | 2.88 | 6.38E-05 | 0.0028 |
| DMC1             | 2.88 | 6.12E-05 | 0.0028 |
| ENST000003533791 | 2.88 | 1.55E-02 | 0.0384 |
| CHST2            | 2.88 | 1.00E-02 | 0.0286 |
| AC007952.4       | 2.87 | 2.23E-03 | 0.0117 |
| AL606834.1       | 2.87 | 1.93E-03 | 0.0107 |
| PNMA2            | 2.87 | 7.57E-03 | 0.0239 |
| TIPIN            | 2.87 | 1.53E-04 | 0.0036 |
| AC147651.3       | 2.86 | 5.53E-04 | 0.0059 |
| ENST000000031002 | 2.86 | 6.26E-05 | 0.0028 |
| MRPL37           | 2.86 | 1.61E-05 | 0.0019 |
| ENST000003386310 | 2.86 | 1.19E-04 | 0.0034 |
| HMGB2            | 2.86 | 1.74E-05 | 0.0020 |
| AC004832.3       | 2.86 | 5.37E-04 | 0.0058 |
| RNU5E-1          | 2.86 | 2.83E-03 | 0.0133 |
| FOXM1            | 2.85 | 8.45E-05 | 0.0030 |
| ENST000003252140 | 2.85 | 1.70E-02 | 0.0410 |
| BOLA3-AS1        | 2.85 | 1.94E-03 | 0.0107 |
| KIF3B            | 2.85 | 2.24E-04 | 0.0041 |
| SPDL1            | 2.85 | 2.16E-05 | 0.0020 |
| REEP2            | 2.84 | 1.97E-04 | 0.0040 |
| GPAT2            | 2.84 | 3.50E-03 | 0.0149 |
| GAS2L3           | 2.84 | 1.91E-04 | 0.0039 |
| AC012073.1       | 2.84 | 2.71E-03 | 0.0130 |

|                  |      |          |        |
|------------------|------|----------|--------|
| HSP90AB1         | 2.83 | 7.92E-05 | 0.0030 |
| DHFR             | 2.83 | 1.88E-05 | 0.0020 |
| PRMT1            | 2.83 | 8.41E-05 | 0.0030 |
| GNGT2            | 2.83 | 4.21E-03 | 0.0167 |
| ZNF768           | 2.83 | 4.67E-04 | 0.0054 |
| TANC1            | 2.83 | 9.65E-04 | 0.0076 |
| PPIAP22          | 2.83 | 9.97E-03 | 0.0285 |
| IL2RA            | 2.82 | 3.32E-04 | 0.0047 |
| NAPSA            | 2.82 | 1.76E-04 | 0.0039 |
| TNFAIP3          | 2.82 | 3.40E-04 | 0.0048 |
| SHMT2            | 2.81 | 2.20E-05 | 0.0020 |
| UPK1A            | 2.81 | 7.81E-03 | 0.0244 |
| RNVU1-15         | 2.81 | 6.18E-03 | 0.0210 |
| BTBD3            | 2.81 | 5.49E-05 | 0.0027 |
| WSB2             | 2.81 | 2.41E-04 | 0.0042 |
| DDX11-AS1        | 2.81 | 1.00E-02 | 0.0286 |
| RASSF4           | 2.80 | 1.86E-03 | 0.0105 |
| RFC2             | 2.80 | 1.16E-04 | 0.0034 |
| XRCC3            | 2.80 | 1.46E-04 | 0.0036 |
| PDF              | 2.80 | 1.82E-03 | 0.0104 |
| AIF1             | 2.80 | 4.83E-03 | 0.0181 |
| TUBG1            | 2.80 | 5.40E-05 | 0.0027 |
| EBNA1BP2         | 2.80 | 1.65E-04 | 0.0037 |
| DEPP1            | 2.79 | 1.34E-02 | 0.0347 |
| DIXDC1           | 2.79 | 2.12E-05 | 0.0020 |
| CHST3            | 2.79 | 9.33E-03 | 0.0273 |
| DTD1             | 2.79 | 2.27E-05 | 0.0020 |
| FANCB            | 2.79 | 3.07E-04 | 0.0046 |
| AC004585.1       | 2.79 | 1.44E-03 | 0.0092 |
| ENST000003535480 | 2.78 | 3.50E-04 | 0.0048 |
| ENST000003616110 | 2.78 | 2.39E-04 | 0.0042 |
| FIGNL1           | 2.78 | 6.23E-05 | 0.0028 |
| SPIRE1           | 2.78 | 2.10E-03 | 0.0113 |
| AC073611.1       | 2.78 | 6.72E-03 | 0.0222 |
| SNHG3            | 2.78 | 7.74E-05 | 0.0030 |
| FAM43A           | 2.77 | 9.36E-04 | 0.0075 |
| TNK1             | 2.77 | 7.23E-03 | 0.0232 |
| HIST3H2BB        | 2.77 | 5.12E-04 | 0.0056 |
| PRSS23           | 2.77 | 2.43E-03 | 0.0123 |
| HNRNPAB          | 2.76 | 5.52E-05 | 0.0027 |
| FOXO3            | 2.76 | 1.43E-02 | 0.0364 |
| ENST000002247840 | 2.76 | 1.22E-02 | 0.0326 |
| RYR1             | 2.75 | 2.15E-04 | 0.0041 |
| SLC7A11          | 2.75 | 2.70E-03 | 0.0130 |
| MAP3K20          | 2.75 | 2.52E-03 | 0.0125 |
| NUDT1            | 2.75 | 6.95E-05 | 0.0029 |
| TICRR            | 2.75 | 3.69E-03 | 0.0154 |
| DRP2             | 2.75 | 4.62E-04 | 0.0054 |
| RAI14            | 2.75 | 3.80E-04 | 0.0050 |
| LIMA1            | 2.74 | 1.07E-04 | 0.0033 |

|                  |      |          |        |
|------------------|------|----------|--------|
| AC245014.3       | 2.74 | 1.23E-04 | 0.0034 |
| VPS9D1-AS1       | 2.74 | 4.04E-03 | 0.0162 |
| TCAF2P1          | 2.74 | 3.68E-04 | 0.0049 |
| GAB1             | 2.74 | 3.63E-03 | 0.0152 |
| ENST000002957462 | 2.74 | 1.36E-04 | 0.0035 |
| PUS7             | 2.74 | 2.48E-05 | 0.0021 |
| CSRNP1           | 2.74 | 3.40E-04 | 0.0048 |
| FBXO5            | 2.74 | 6.25E-05 | 0.0028 |
| AC009309.1       | 2.73 | 5.72E-03 | 0.0201 |
| ENST000002639850 | 2.73 | 1.43E-04 | 0.0036 |
| BYSL             | 2.73 | 3.42E-03 | 0.0147 |
| HIST1H3I         | 2.73 | 2.54E-04 | 0.0043 |
| CCDC144CP        | 2.73 | 1.64E-02 | 0.0400 |
| ENST000003386350 | 2.73 | 3.19E-04 | 0.0047 |
| CMTM4            | 2.73 | 1.18E-03 | 0.0083 |
| ASB2             | 2.73 | 3.90E-03 | 0.0159 |
| ALDH1L2          | 2.73 | 1.16E-02 | 0.0316 |
| AC073529.1       | 2.73 | 3.09E-04 | 0.0046 |
| BOLA3            | 2.72 | 1.08E-04 | 0.0033 |
| ARHGEF12         | 2.72 | 2.91E-04 | 0.0045 |
| HIST1H1E         | 2.72 | 8.71E-05 | 0.0031 |
| PPP4R4           | 2.72 | 3.12E-03 | 0.0140 |
| CHTF18           | 2.71 | 4.12E-04 | 0.0051 |
| CENPP            | 2.71 | 8.41E-03 | 0.0256 |
| SQOR             | 2.71 | 2.36E-05 | 0.0021 |
| CDCA7L           | 2.71 | 2.69E-04 | 0.0044 |
| PPP1R14B         | 2.71 | 2.08E-04 | 0.0040 |
| LYSMD1           | 2.71 | 1.55E-04 | 0.0036 |
| AGFG1            | 2.71 | 2.32E-05 | 0.0021 |
| C9orf40          | 2.71 | 4.65E-04 | 0.0054 |
| MCM8             | 2.71 | 3.61E-04 | 0.0049 |
| FAM216A          | 2.71 | 1.35E-04 | 0.0035 |
| RNU5D-1          | 2.70 | 2.63E-04 | 0.0044 |
| SNORD91B         | 2.70 | 3.53E-03 | 0.0150 |
| ATRNL1           | 2.70 | 3.77E-03 | 0.0156 |
| ALYREF           | 2.70 | 5.44E-05 | 0.0027 |
| SYTL3            | 2.69 | 7.18E-05 | 0.0029 |
| APBB2            | 2.69 | 1.41E-03 | 0.0091 |
| CST7             | 2.69 | 5.70E-04 | 0.0059 |
| CD82             | 2.69 | 1.95E-04 | 0.0040 |
| BZW1P2           | 2.69 | 1.16E-04 | 0.0034 |
| FAH              | 2.69 | 8.14E-04 | 0.0070 |
| PKM              | 2.68 | 2.70E-05 | 0.0021 |
| LRFN4            | 2.68 | 6.33E-04 | 0.0062 |
| PTP4A3           | 2.68 | 2.42E-03 | 0.0122 |
| CU634019.6       | 2.68 | 1.35E-02 | 0.0349 |
| ENST000003253240 | 2.68 | 5.80E-05 | 0.0028 |
| ENST000002710024 | 2.68 | 1.45E-04 | 0.0036 |
| DBNDD2           | 2.68 | 1.61E-03 | 0.0098 |
| NRIP3            | 2.67 | 5.86E-04 | 0.0060 |

|                  |      |          |        |
|------------------|------|----------|--------|
| CD276            | 2.67 | 1.69E-03 | 0.0101 |
| SEPT8            | 2.67 | 2.22E-02 | 0.0497 |
| PFKM             | 2.67 | 2.22E-05 | 0.0020 |
| GALE             | 2.67 | 3.19E-04 | 0.0047 |
| LMNB1            | 2.67 | 7.56E-05 | 0.0030 |
| PPIF             | 2.67 | 1.12E-04 | 0.0033 |
| GNAI1            | 2.66 | 8.52E-03 | 0.0258 |
| RDM1             | 2.66 | 2.19E-02 | 0.0493 |
| DHCR7            | 2.66 | 1.25E-04 | 0.0035 |
| NUDT12           | 2.66 | 7.69E-03 | 0.0241 |
| CCDC74A          | 2.66 | 6.17E-03 | 0.0210 |
| BCL2L2           | 2.66 | 5.19E-04 | 0.0057 |
| RFC4             | 2.66 | 2.21E-05 | 0.0020 |
| IFRD2            | 2.65 | 1.59E-04 | 0.0037 |
| GIHCG            | 2.65 | 6.91E-05 | 0.0029 |
| ENST000003548580 | 2.65 | 1.62E-04 | 0.0037 |
| SLC35G2          | 2.65 | 7.94E-04 | 0.0069 |
| HK2              | 2.65 | 2.27E-04 | 0.0042 |
| MYO1D            | 2.65 | 7.68E-03 | 0.0241 |
| BCKDK            | 2.64 | 8.11E-04 | 0.0070 |
| RNASEH2A         | 2.64 | 6.09E-05 | 0.0028 |
| HMGB1P6          | 2.64 | 4.31E-05 | 0.0024 |
| SPINT1           | 2.64 | 1.77E-03 | 0.0102 |
| HAUS6P3          | 2.64 | 8.67E-03 | 0.0261 |
| TTC30A           | 2.64 | 2.55E-03 | 0.0126 |
| NR4A2            | 2.63 | 1.62E-02 | 0.0396 |
| AL390719.1       | 2.63 | 6.09E-03 | 0.0209 |
| MCM6             | 2.63 | 2.86E-05 | 0.0022 |
| PPAN             | 2.63 | 1.09E-04 | 0.0033 |
| FANCG            | 2.63 | 7.28E-05 | 0.0029 |
| SORD             | 2.63 | 7.00E-04 | 0.0065 |
| HIST1H1C         | 2.63 | 3.31E-05 | 0.0023 |
| SNORA71A         | 2.63 | 8.28E-03 | 0.0253 |
| CHAC2            | 2.63 | 4.76E-05 | 0.0026 |
| ENST000002546630 | 2.62 | 2.67E-03 | 0.0129 |
| FAM92A           | 2.62 | 1.01E-03 | 0.0077 |
| AJM1             | 2.62 | 5.35E-04 | 0.0058 |
| ARHGAP11A        | 2.62 | 2.65E-05 | 0.0021 |
| CHRNA5           | 2.62 | 1.18E-03 | 0.0083 |
| LINC00888        | 2.62 | 2.38E-04 | 0.0042 |
| NFKBIA           | 2.62 | 2.43E-05 | 0.0021 |
| KRT18            | 2.62 | 1.55E-04 | 0.0036 |
| ADORA2B          | 2.62 | 1.82E-04 | 0.0039 |
| PDXP             | 2.61 | 3.71E-04 | 0.0049 |
| ENST000003574290 | 2.61 | 6.33E-04 | 0.0062 |
| CD27-AS1         | 2.61 | 6.20E-04 | 0.0062 |
| LMNB2            | 2.61 | 2.76E-05 | 0.0021 |
| ENST000003131170 | 2.61 | 5.45E-03 | 0.0195 |
| SAP30            | 2.61 | 3.07E-05 | 0.0022 |
| ST7-OT4          | 2.61 | 3.14E-04 | 0.0046 |

|                  |      |          |        |
|------------------|------|----------|--------|
| SRGN             | 2.60 | 1.96E-04 | 0.0040 |
| C15orf38-AP3S2   | 2.60 | 1.67E-02 | 0.0405 |
| C3orf14          | 2.60 | 6.51E-04 | 0.0063 |
| TFDP1            | 2.60 | 2.76E-05 | 0.0021 |
| ENST000003162181 | 2.60 | 1.41E-03 | 0.0091 |
| SNRPE            | 2.60 | 4.31E-05 | 0.0024 |
| ENST000002656020 | 2.60 | 3.01E-04 | 0.0046 |
| BZW1             | 2.60 | 4.13E-05 | 0.0024 |
| ZC3H12D          | 2.60 | 1.12E-03 | 0.0081 |
| AC125611.2       | 2.60 | 3.84E-03 | 0.0158 |
| LMNB1-DT         | 2.60 | 2.02E-03 | 0.0110 |
| IFIT1P1          | 2.60 | 6.32E-03 | 0.0214 |
| PSMD1            | 2.59 | 2.03E-02 | 0.0467 |
| POLA1            | 2.59 | 3.61E-05 | 0.0023 |
| RACGAP1          | 2.59 | 3.91E-05 | 0.0024 |
| INCENP           | 2.59 | 2.69E-04 | 0.0044 |
| ENST000003339420 | 2.58 | 9.38E-03 | 0.0274 |
| MAPK12           | 2.58 | 9.57E-04 | 0.0076 |
| ENST00000629913  | 2.58 | 9.30E-03 | 0.0272 |
| PLAGL1           | 2.58 | 8.01E-04 | 0.0069 |
| ENST000002162812 | 2.58 | 1.38E-04 | 0.0035 |
| MAP7D2           | 2.57 | 1.99E-02 | 0.0460 |
| AC012645.1       | 2.57 | 2.70E-03 | 0.0130 |
| SNX33            | 2.57 | 1.76E-03 | 0.0102 |
| RPL26L1          | 2.57 | 8.03E-05 | 0.0030 |
| PHGDH            | 2.57 | 5.26E-03 | 0.0190 |
| PLK1             | 2.57 | 4.23E-04 | 0.0052 |
| GFOD1            | 2.57 | 3.15E-03 | 0.0141 |
| HMGA1            | 2.57 | 7.55E-04 | 0.0067 |
| GGCT             | 2.56 | 3.22E-05 | 0.0023 |
| TST              | 2.56 | 1.12E-02 | 0.0308 |
| ACOT7            | 2.56 | 2.57E-04 | 0.0043 |
| POLD2            | 2.56 | 4.22E-04 | 0.0052 |
| ENST000003340820 | 2.56 | 1.21E-04 | 0.0034 |
| SGMS2            | 2.56 | 4.97E-03 | 0.0184 |
| SMC2             | 2.56 | 4.48E-05 | 0.0025 |
| BEST4            | 2.56 | 1.15E-02 | 0.0313 |
| CIP2A            | 2.56 | 2.56E-05 | 0.0021 |
| IRAK3            | 2.55 | 2.60E-04 | 0.0044 |
| TCP1             | 2.55 | 5.90E-05 | 0.0028 |
| HSPA2            | 2.55 | 1.04E-03 | 0.0079 |
| RNU4ATAC         | 2.55 | 8.50E-03 | 0.0257 |
| CDK2             | 2.55 | 3.49E-05 | 0.0023 |
| MRPL39           | 2.55 | 1.36E-04 | 0.0035 |
| SLC25A4          | 2.55 | 2.34E-03 | 0.0120 |
| ST3GAL4          | 2.55 | 1.53E-04 | 0.0036 |
| ENST000003048341 | 2.55 | 5.23E-03 | 0.0190 |
| CYCS             | 2.55 | 9.80E-05 | 0.0031 |
| MDH1B            | 2.55 | 1.32E-02 | 0.0343 |
| STK24-AS1        | 2.54 | 5.87E-03 | 0.0204 |

|                  |      |          |        |
|------------------|------|----------|--------|
| TXN              | 2.54 | 1.80E-03 | 0.0103 |
| ENST000002579040 | 2.54 | 1.26E-04 | 0.0035 |
| NINJ1            | 2.54 | 1.33E-04 | 0.0035 |
| IL1R1            | 2.53 | 4.25E-03 | 0.0167 |
| ENST000003243662 | 2.53 | 3.22E-05 | 0.0023 |
| CDCA7            | 2.53 | 1.07E-04 | 0.0033 |
| RP9P             | 2.53 | 2.60E-03 | 0.0127 |
| ZNF334           | 2.53 | 3.55E-04 | 0.0048 |
| PTGIR            | 2.53 | 1.74E-03 | 0.0102 |
| NDUFV2P1         | 2.53 | 1.31E-02 | 0.0342 |
| SCML2            | 2.52 | 2.50E-03 | 0.0124 |
| ZBED8            | 2.52 | 3.51E-04 | 0.0048 |
| C11orf24         | 2.52 | 5.90E-03 | 0.0204 |
| NDC1             | 2.52 | 6.72E-05 | 0.0029 |
| MCM5             | 2.52 | 3.43E-05 | 0.0023 |
| GPT2             | 2.52 | 2.42E-04 | 0.0042 |
| PERP             | 2.52 | 5.90E-04 | 0.0060 |
| HIF1A-AS2        | 2.52 | 1.06E-02 | 0.0297 |
| AK6              | 2.52 | 4.53E-05 | 0.0025 |
| C1QBP            | 2.51 | 1.11E-04 | 0.0033 |
| DGUOK-AS1        | 2.51 | 9.60E-03 | 0.0278 |
| TMEM106C         | 2.51 | 1.11E-03 | 0.0081 |
| IL18R1           | 2.51 | 1.54E-02 | 0.0382 |
| ERRFI1           | 2.51 | 2.06E-02 | 0.0472 |
| RF00592.2        | 2.50 | 9.82E-04 | 0.0077 |
| RAB13            | 2.50 | 2.36E-03 | 0.0121 |
| DARS2            | 2.50 | 5.84E-05 | 0.0028 |
| ZNF492           | 2.50 | 1.08E-02 | 0.0302 |
| SYT11            | 2.50 | 1.57E-04 | 0.0037 |
| GNB4             | 2.49 | 1.91E-04 | 0.0039 |
| ENST000002503792 | 2.49 | 7.24E-03 | 0.0232 |
| PSMA2            | 2.49 | 2.82E-05 | 0.0021 |
| ENST000002166052 | 2.49 | 2.31E-04 | 0.0042 |
| ENST000002831794 | 2.49 | 4.09E-04 | 0.0051 |
| ENST000003069320 | 2.49 | 2.44E-03 | 0.0123 |
| AC073263.2       | 2.49 | 7.10E-04 | 0.0065 |
| UBE2E2           | 2.48 | 2.25E-03 | 0.0118 |
| WEE1             | 2.48 | 5.21E-04 | 0.0057 |
| LINC00239        | 2.48 | 1.17E-02 | 0.0318 |
| SNRNP25          | 2.48 | 1.11E-03 | 0.0081 |
| TLCD1            | 2.48 | 5.21E-03 | 0.0190 |
| CENPJ            | 2.48 | 3.76E-05 | 0.0023 |
| PRG4             | 2.48 | 3.03E-03 | 0.0138 |
| NDUFA6           | 2.48 | 6.47E-04 | 0.0063 |
| TOMM40           | 2.47 | 1.57E-04 | 0.0037 |
| MASTL            | 2.47 | 3.69E-05 | 0.0023 |
| RHOC             | 2.47 | 4.27E-04 | 0.0052 |
| CD109            | 2.47 | 2.83E-04 | 0.0045 |
| NCKAP1           | 2.47 | 2.16E-03 | 0.0114 |
| ZNF788P          | 2.47 | 4.23E-05 | 0.0024 |

|                  |      |          |        |
|------------------|------|----------|--------|
| MIS18A           | 2.47 | 8.56E-05 | 0.0030 |
| TRAP1            | 2.47 | 7.82E-05 | 0.0030 |
| NOP16            | 2.47 | 2.01E-04 | 0.0040 |
| FSTL3            | 2.47 | 3.69E-04 | 0.0049 |
| ENST000003212330 | 2.46 | 1.44E-04 | 0.0036 |
| ENST000002716361 | 2.46 | 9.98E-03 | 0.0285 |
| TIMM10           | 2.46 | 1.14E-04 | 0.0033 |
| KLHL23           | 2.46 | 5.55E-04 | 0.0059 |
| KDM4A-AS1        | 2.45 | 2.82E-03 | 0.0133 |
| ENST000003183880 | 2.45 | 1.50E-04 | 0.0036 |
| PMAIP1           | 2.45 | 8.96E-04 | 0.0073 |
| RN7SL3           | 2.45 | 2.37E-04 | 0.0042 |
| AC027031.2       | 2.45 | 1.11E-02 | 0.0307 |
| HES2             | 2.45 | 7.52E-03 | 0.0238 |
| AGAP1            | 2.45 | 4.04E-03 | 0.0162 |
| FAM96AP2         | 2.45 | 6.71E-03 | 0.0222 |
| TMEM44           | 2.45 | 8.57E-04 | 0.0072 |
| PROB1            | 2.45 | 2.18E-03 | 0.0115 |
| AC084117.1       | 2.45 | 1.82E-03 | 0.0104 |
| METTL1           | 2.44 | 2.59E-04 | 0.0044 |
| MTFP1            | 2.44 | 1.94E-04 | 0.0039 |
| E2F1             | 2.44 | 3.13E-04 | 0.0046 |
| TMEM231          | 2.44 | 1.37E-02 | 0.0353 |
| GPN3             | 2.43 | 2.85E-04 | 0.0045 |
| ZNF711           | 2.43 | 1.34E-02 | 0.0347 |
| ICAM1            | 2.43 | 1.42E-04 | 0.0036 |
| B9D1             | 2.43 | 1.69E-03 | 0.0100 |
| ENST000003612190 | 2.43 | 7.70E-05 | 0.0030 |
| ENST000002186521 | 2.43 | 1.67E-02 | 0.0406 |
| DCUN1D5          | 2.43 | 1.94E-04 | 0.0039 |
| GNG8             | 2.43 | 1.80E-02 | 0.0428 |
| PFKP             | 2.43 | 3.50E-05 | 0.0023 |
| MRPL12           | 2.43 | 1.73E-03 | 0.0102 |
| RBBP8            | 2.43 | 1.56E-04 | 0.0036 |
| UPRT             | 2.43 | 1.46E-04 | 0.0036 |
| FAM210A          | 2.43 | 3.53E-05 | 0.0023 |
| LSM4             | 2.42 | 3.25E-03 | 0.0143 |
| ENST000003334791 | 2.42 | 6.89E-05 | 0.0029 |
| GALK1            | 2.42 | 3.74E-04 | 0.0049 |
| RCC1             | 2.42 | 1.65E-04 | 0.0037 |
| SNRPD1           | 2.42 | 8.27E-05 | 0.0030 |
| SIAH2            | 2.42 | 4.44E-05 | 0.0025 |
| ENST000003559680 | 2.42 | 1.51E-04 | 0.0036 |
| CHAF1B           | 2.42 | 8.42E-05 | 0.0030 |
| AL138724.1       | 2.42 | 3.45E-03 | 0.0148 |
| ENST000003381930 | 2.41 | 3.54E-05 | 0.0023 |
| CCDC50           | 2.41 | 9.10E-03 | 0.0268 |
| POFUT1           | 2.41 | 9.01E-05 | 0.0031 |
| P4HA1            | 2.41 | 3.55E-05 | 0.0023 |
| PCBD1            | 2.41 | 1.29E-04 | 0.0035 |

|                  |      |          |        |
|------------------|------|----------|--------|
| ENST000002808920 | 2.41 | 4.29E-04 | 0.0052 |
| GATM             | 2.41 | 5.52E-03 | 0.0196 |
| ADCY3            | 2.41 | 2.42E-03 | 0.0122 |
| ENST000002492701 | 2.41 | 5.96E-04 | 0.0060 |
| MRPL11           | 2.41 | 2.80E-04 | 0.0045 |
| ENST000003146660 | 2.40 | 3.68E-04 | 0.0049 |
| FDPS             | 2.40 | 5.25E-05 | 0.0027 |
| STIP1            | 2.40 | 1.97E-04 | 0.0040 |
| AL078644.1       | 2.40 | 1.22E-02 | 0.0326 |
| SNHG15           | 2.40 | 1.36E-04 | 0.0035 |
| SHMT1            | 2.40 | 7.67E-04 | 0.0068 |
| NUDT15           | 2.40 | 1.41E-04 | 0.0036 |
| CDCA4            | 2.40 | 5.99E-05 | 0.0028 |
| HIST1H4H         | 2.40 | 3.82E-04 | 0.0050 |
| PAQR7            | 2.40 | 1.81E-03 | 0.0104 |
| CENPQ            | 2.39 | 1.92E-04 | 0.0039 |
| TIAM2            | 2.39 | 1.21E-04 | 0.0034 |
| SNRPB            | 2.39 | 7.11E-05 | 0.0029 |
| COPG2            | 2.39 | 3.14E-04 | 0.0046 |
| RRM1             | 2.39 | 4.92E-05 | 0.0026 |
| ATAD2            | 2.39 | 4.53E-05 | 0.0025 |
| TNFRSF12A        | 2.39 | 2.94E-04 | 0.0045 |
| SFXN4            | 2.39 | 2.63E-04 | 0.0044 |
| C1orf74          | 2.39 | 1.90E-04 | 0.0039 |
| NUDT11           | 2.39 | 6.79E-03 | 0.0224 |
| SMPDL3B          | 2.38 | 1.73E-03 | 0.0102 |
| CALM3            | 2.38 | 6.78E-05 | 0.0029 |
| SNORD12C         | 2.38 | 2.05E-02 | 0.0470 |
| PKN3             | 2.38 | 2.50E-03 | 0.0124 |
| ENST000002641590 | 2.38 | 9.27E-03 | 0.0271 |
| SLC31A1          | 2.38 | 5.50E-05 | 0.0027 |
| AK2              | 2.38 | 6.36E-05 | 0.0028 |
| PRDX3            | 2.37 | 6.09E-05 | 0.0028 |
| ENST000003290922 | 2.37 | 5.22E-03 | 0.0190 |
| PARPBP           | 2.37 | 1.87E-04 | 0.0039 |
| MICAL2           | 2.37 | 7.08E-04 | 0.0065 |
| ENST000003546941 | 2.37 | 6.08E-05 | 0.0028 |
| CPS1             | 2.37 | 5.00E-03 | 0.0185 |
| PHB              | 2.37 | 1.45E-04 | 0.0036 |
| PRDX4            | 2.37 | 5.24E-04 | 0.0057 |
| POMP             | 2.37 | 1.90E-04 | 0.0039 |
| AC004825.2       | 2.37 | 6.28E-03 | 0.0213 |
| NPM1P9           | 2.37 | 2.83E-03 | 0.0133 |
| SUV39H1          | 2.36 | 8.53E-05 | 0.0030 |
| TTC23            | 2.36 | 4.38E-03 | 0.0171 |
| ENST000003213581 | 2.36 | 8.15E-05 | 0.0030 |
| IMPDH2           | 2.36 | 4.17E-05 | 0.0024 |
| MRPL17           | 2.36 | 3.96E-05 | 0.0024 |
| CHCHD2           | 2.36 | 4.43E-05 | 0.0025 |
| AC130324.3       | 2.36 | 4.50E-04 | 0.0054 |

|                  |      |          |        |
|------------------|------|----------|--------|
| SNORD83A         | 2.36 | 4.13E-03 | 0.0165 |
| SMCO4            | 2.36 | 8.28E-04 | 0.0071 |
| AC087632.1       | 2.36 | 2.05E-04 | 0.0040 |
| ENST000002982880 | 2.36 | 3.27E-03 | 0.0143 |
| SNORA71D         | 2.35 | 4.74E-03 | 0.0179 |
| NR2F6            | 2.35 | 1.23E-02 | 0.0328 |
| XRCC2            | 2.35 | 6.14E-05 | 0.0028 |
| ENST000002810811 | 2.35 | 7.78E-05 | 0.0030 |
| MERTK            | 2.35 | 8.86E-03 | 0.0264 |
| PDLIM7           | 2.35 | 8.49E-04 | 0.0071 |
| GPSM2            | 2.35 | 8.75E-05 | 0.0031 |
| RDH10            | 2.35 | 1.44E-04 | 0.0036 |
| WDR76            | 2.35 | 4.37E-05 | 0.0024 |
| POLD1            | 2.35 | 5.85E-04 | 0.0060 |
| MT1L             | 2.35 | 7.32E-03 | 0.0234 |
| SNORA65          | 2.35 | 9.99E-03 | 0.0286 |
| MESP1            | 2.35 | 7.33E-03 | 0.0234 |
| DUSP3            | 2.34 | 2.99E-04 | 0.0046 |
| MORF4L2          | 2.34 | 9.14E-05 | 0.0031 |
| SSRP1            | 2.34 | 6.74E-05 | 0.0029 |
| RNU5F-1          | 2.34 | 2.38E-03 | 0.0121 |
| ENST000003251100 | 2.34 | 1.51E-04 | 0.0036 |
| RUVBL2           | 2.33 | 1.31E-04 | 0.0035 |
| ENST000002331142 | 2.33 | 7.85E-05 | 0.0030 |
| DUT              | 2.33 | 6.10E-05 | 0.0028 |
| SNHG4            | 2.33 | 3.37E-04 | 0.0048 |
| ENST000002974400 | 2.33 | 1.67E-04 | 0.0038 |
| GLA              | 2.33 | 1.13E-04 | 0.0033 |
| FKBP4            | 2.33 | 3.86E-04 | 0.0050 |
| MBOAT2           | 2.33 | 2.81E-04 | 0.0045 |
| AC243587.1       | 2.33 | 1.08E-03 | 0.0080 |
| HMGN2P5          | 2.33 | 1.08E-03 | 0.0080 |
| ITPRIPL1         | 2.33 | 6.90E-05 | 0.0029 |
| FRRS1            | 2.33 | 5.46E-03 | 0.0195 |
| WDR54            | 2.33 | 7.02E-05 | 0.0029 |
| ADAM9            | 2.33 | 3.22E-04 | 0.0047 |
| ENST000002045170 | 2.32 | 4.44E-04 | 0.0053 |
| PTPN7            | 2.32 | 7.57E-05 | 0.0030 |
| LAMA2            | 2.32 | 2.01E-02 | 0.0464 |
| ENST000003016862 | 2.32 | 2.38E-03 | 0.0121 |
| PALD1            | 2.32 | 3.79E-03 | 0.0156 |
| BCL2L12          | 2.32 | 1.76E-03 | 0.0102 |
| NINJ2            | 2.31 | 1.90E-02 | 0.0445 |
| ALDH4A1          | 2.31 | 1.65E-03 | 0.0099 |
| MSRB1            | 2.30 | 1.16E-04 | 0.0034 |
| ENST000003237440 | 2.30 | 1.68E-03 | 0.0100 |
| ENST000002993000 | 2.30 | 1.13E-04 | 0.0033 |
| ZNF730           | 2.30 | 1.82E-03 | 0.0104 |
| AL031733.2       | 2.30 | 4.85E-03 | 0.0181 |
| SNX10            | 2.30 | 1.06E-03 | 0.0079 |

|                  |      |          |        |
|------------------|------|----------|--------|
| FAM89A           | 2.30 | 3.76E-04 | 0.0049 |
| STX11            | 2.30 | 4.24E-04 | 0.0052 |
| POLA2            | 2.30 | 5.66E-05 | 0.0028 |
| RAPH1            | 2.29 | 1.47E-04 | 0.0036 |
| ENST000003055600 | 2.29 | 1.31E-02 | 0.0342 |
| ENST000002958091 | 2.29 | 1.96E-03 | 0.0108 |
| SLC38A5          | 2.29 | 1.07E-03 | 0.0080 |
| FHL3             | 2.29 | 9.93E-04 | 0.0077 |
| ENST000003044001 | 2.29 | 6.36E-03 | 0.0214 |
| PSMA6            | 2.29 | 5.79E-05 | 0.0028 |
| ENO2             | 2.29 | 1.19E-04 | 0.0034 |
| ENST000003738330 | 2.28 | 3.14E-04 | 0.0046 |
| ORC6             | 2.28 | 1.06E-04 | 0.0033 |
| SNX9             | 2.28 | 3.48E-04 | 0.0048 |
| ENST000002904290 | 2.28 | 1.51E-03 | 0.0094 |
| AC098818.2       | 2.28 | 1.78E-02 | 0.0423 |
| MATK             | 2.28 | 2.39E-04 | 0.0042 |
| GLO1             | 2.28 | 4.58E-04 | 0.0054 |
| MAD2L2           | 2.28 | 6.55E-05 | 0.0029 |
| ZC3HAV1L         | 2.28 | 2.06E-03 | 0.0111 |
| HMGCS1           | 2.27 | 1.90E-04 | 0.0039 |
| WDFY3            | 2.27 | 3.59E-03 | 0.0151 |
| ENST000002967010 | 2.27 | 2.90E-03 | 0.0135 |
| TOM1L1           | 2.27 | 7.10E-03 | 0.0230 |
| PPIL1            | 2.27 | 3.32E-04 | 0.0047 |
| FOSL2            | 2.27 | 1.27E-02 | 0.0336 |
| ENST000002642112 | 2.27 | 3.11E-03 | 0.0140 |
| GVQW2            | 2.27 | 4.30E-03 | 0.0169 |
| MZT1             | 2.26 | 1.36E-04 | 0.0035 |
| IFI27L1          | 2.26 | 5.70E-04 | 0.0059 |
| CD160            | 2.26 | 3.41E-04 | 0.0048 |
| TBC1D16          | 2.26 | 3.41E-03 | 0.0147 |
| ENST000002850391 | 2.26 | 2.06E-02 | 0.0472 |
| CNTNAP1          | 2.25 | 1.55E-03 | 0.0096 |
| NDUFAB1          | 2.25 | 1.92E-04 | 0.0039 |
| PTMA             | 2.25 | 3.39E-04 | 0.0048 |
| SASS6            | 2.25 | 1.06E-04 | 0.0033 |
| HSPA9            | 2.25 | 8.72E-05 | 0.0031 |
| ENST000002346260 | 2.25 | 7.59E-05 | 0.0030 |
| SPA17            | 2.25 | 8.92E-04 | 0.0073 |
| TMPO             | 2.24 | 4.54E-05 | 0.0025 |
| ENST000003213941 | 2.24 | 6.37E-04 | 0.0062 |
| ENST000002916340 | 2.24 | 1.65E-04 | 0.0037 |
| CCT5             | 2.24 | 1.06E-04 | 0.0033 |
| KIF20B           | 2.24 | 5.03E-05 | 0.0026 |
| SNRPF            | 2.24 | 6.21E-05 | 0.0028 |
| SCARNA22         | 2.24 | 2.64E-04 | 0.0044 |
| XYLB             | 2.24 | 7.25E-04 | 0.0066 |
| C8orf88          | 2.24 | 3.25E-03 | 0.0143 |
| SNORA80B         | 2.23 | 3.85E-03 | 0.0158 |

|                  |      |          |        |
|------------------|------|----------|--------|
| AC018413.1       | 2.23 | 1.40E-02 | 0.0358 |
| ENST000003243403 | 2.23 | 8.64E-05 | 0.0030 |
| AC136632.1       | 2.23 | 1.40E-03 | 0.0091 |
| SFXN1            | 2.23 | 3.04E-04 | 0.0046 |
| PTPRK            | 2.22 | 5.70E-04 | 0.0059 |
| ENST000002511011 | 2.22 | 1.71E-03 | 0.0101 |
| ENTHD1           | 2.22 | 1.96E-02 | 0.0455 |
| ANAPC11          | 2.22 | 9.51E-05 | 0.0031 |
| SAV1             | 2.22 | 2.43E-04 | 0.0042 |
| GSTCD            | 2.22 | 5.98E-05 | 0.0028 |
| SNRPG            | 2.22 | 1.22E-04 | 0.0034 |
| NDST1            | 2.22 | 1.54E-02 | 0.0383 |
| C10orf25         | 2.22 | 2.96E-03 | 0.0136 |
| ENST000003413691 | 2.22 | 2.80E-03 | 0.0133 |
| TEDC1            | 2.22 | 1.74E-04 | 0.0038 |
| ENST000003319440 | 2.22 | 3.68E-04 | 0.0049 |
| TONSL            | 2.21 | 9.50E-04 | 0.0076 |
| STOML2           | 2.21 | 1.84E-04 | 0.0039 |
| EHD4             | 2.21 | 2.16E-04 | 0.0041 |
| ENST000002595230 | 2.21 | 4.38E-03 | 0.0171 |
| C9orf64          | 2.21 | 6.47E-05 | 0.0028 |
| FZD3             | 2.21 | 4.89E-04 | 0.0055 |
| CLPB             | 2.21 | 2.68E-04 | 0.0044 |
| MXD3             | 2.20 | 1.64E-03 | 0.0099 |
| RF00003.30       | 2.20 | 6.17E-03 | 0.0210 |
| ENST000002455390 | 2.20 | 1.98E-04 | 0.0040 |
| SKA2             | 2.20 | 7.95E-05 | 0.0030 |
| AC005076.1       | 2.20 | 8.90E-04 | 0.0073 |
| KBTBD11          | 2.20 | 1.06E-02 | 0.0296 |
| ENST000003089821 | 2.20 | 1.02E-04 | 0.0032 |
| AL161891.1       | 2.20 | 1.20E-04 | 0.0034 |
| MAP3K8           | 2.19 | 3.52E-04 | 0.0048 |
| GPR19            | 2.19 | 1.70E-03 | 0.0101 |
| LINC01678        | 2.19 | 7.36E-03 | 0.0234 |
| HMG5             | 2.19 | 8.68E-03 | 0.0261 |
| TCEAL9           | 2.19 | 1.22E-02 | 0.0327 |
| ANKRD13B         | 2.19 | 1.69E-03 | 0.0101 |
| THG1L            | 2.19 | 2.36E-04 | 0.0042 |
| BRI3BP           | 2.19 | 2.70E-04 | 0.0044 |
| SNORD19          | 2.19 | 7.34E-03 | 0.0234 |
| KIAA0895L        | 2.19 | 8.37E-04 | 0.0071 |
| C18orf54         | 2.19 | 2.11E-03 | 0.0113 |
| SLFN11           | 2.19 | 9.08E-05 | 0.0031 |
| CCT7             | 2.19 | 9.38E-05 | 0.0031 |
| YWHAG            | 2.18 | 8.92E-05 | 0.0031 |
| ENST000003305031 | 2.18 | 1.41E-04 | 0.0036 |
| MEA1             | 2.18 | 5.91E-05 | 0.0028 |
| HIST1H2APS5      | 2.18 | 9.25E-04 | 0.0075 |
| ENST000003227760 | 2.18 | 2.12E-04 | 0.0041 |
| PRELID1          | 2.18 | 1.66E-04 | 0.0037 |

|                  |      |          |        |
|------------------|------|----------|--------|
| ENST000002781000 | 2.18 | 2.09E-04 | 0.0040 |
| C21orf59-TCP10L  | 2.18 | 3.02E-03 | 0.0138 |
| SOGA3            | 2.18 | 8.60E-03 | 0.0259 |
| TMED8            | 2.18 | 1.33E-04 | 0.0035 |
| SNRPC            | 2.18 | 1.37E-04 | 0.0035 |
| LRRC42           | 2.17 | 8.40E-04 | 0.0071 |
| FAM162A          | 2.17 | 1.27E-04 | 0.0035 |
| ENST000003162730 | 2.17 | 1.13E-03 | 0.0081 |
| NAT14            | 2.17 | 1.34E-03 | 0.0088 |
| PAQR4            | 2.17 | 1.46E-04 | 0.0036 |
| CHPF             | 2.16 | 1.09E-03 | 0.0080 |
| GOT2             | 2.15 | 5.36E-05 | 0.0027 |
| DNAJC18          | 2.15 | 2.07E-04 | 0.0040 |
| HDGF             | 2.15 | 1.74E-04 | 0.0038 |
| KIAA1614-AS1     | 2.15 | 6.08E-03 | 0.0208 |
| CACYBP           | 2.15 | 8.08E-05 | 0.0030 |
| UTP11            | 2.15 | 1.96E-04 | 0.0040 |
| ASIC1            | 2.15 | 1.48E-03 | 0.0093 |
| NUP37            | 2.15 | 1.45E-04 | 0.0036 |
| TIMM21           | 2.15 | 2.91E-04 | 0.0045 |
| KNTC1            | 2.15 | 1.10E-04 | 0.0033 |
| MSH5             | 2.15 | 3.82E-04 | 0.0050 |
| RAB20            | 2.15 | 2.74E-03 | 0.0131 |
| UBE2E3           | 2.14 | 3.86E-04 | 0.0050 |
| AC012254.2       | 2.14 | 2.45E-03 | 0.0123 |
| ENST000002961220 | 2.14 | 1.83E-04 | 0.0039 |
| BOP1             | 2.14 | 1.78E-03 | 0.0103 |
| MAN1A1           | 2.14 | 7.36E-05 | 0.0029 |
| NOCT             | 2.14 | 1.78E-04 | 0.0039 |
| PLS1             | 2.14 | 9.24E-04 | 0.0075 |
| ETF1             | 2.14 | 8.61E-05 | 0.0030 |
| DBI              | 2.14 | 7.00E-05 | 0.0029 |
| ENKD1            | 2.13 | 1.16E-03 | 0.0083 |
| TCEAL4           | 2.13 | 1.70E-03 | 0.0101 |
| B4GALT5          | 2.13 | 2.09E-03 | 0.0112 |
| WDR18            | 2.13 | 3.73E-04 | 0.0049 |
| EEF1E1           | 2.13 | 4.15E-04 | 0.0051 |
| ENST000003238332 | 2.13 | 2.00E-04 | 0.0040 |
| TNF              | 2.13 | 7.96E-04 | 0.0069 |
| ADAP1            | 2.13 | 2.16E-03 | 0.0114 |
| ARHGAP19         | 2.13 | 6.03E-05 | 0.0028 |
| CTNNA1           | 2.13 | 2.62E-03 | 0.0128 |
| SLIRP            | 2.13 | 6.30E-05 | 0.0028 |
| TRIQK            | 2.12 | 3.05E-03 | 0.0138 |
| TIMM8A           | 2.12 | 4.94E-04 | 0.0056 |
| TSR1             | 2.12 | 2.27E-04 | 0.0041 |
| RHOBTB3          | 2.12 | 1.61E-02 | 0.0395 |
| FUOM             | 2.12 | 1.29E-03 | 0.0087 |
| AC007253.1       | 2.12 | 8.68E-03 | 0.0261 |
| SLC25A19         | 2.12 | 4.04E-04 | 0.0051 |

|                  |      |          |        |
|------------------|------|----------|--------|
| PSAT1            | 2.12 | 1.15E-02 | 0.0314 |
| RAVER2           | 2.12 | 5.85E-03 | 0.0204 |
| GPI              | 2.11 | 1.04E-04 | 0.0033 |
| MYB              | 2.11 | 4.68E-03 | 0.0178 |
| EXOSC4           | 2.11 | 2.82E-04 | 0.0045 |
| MPZL1            | 2.11 | 8.95E-05 | 0.0031 |
| SLC37A4          | 2.11 | 3.80E-04 | 0.0050 |
| ENST000002531071 | 2.11 | 1.99E-02 | 0.0460 |
| TOMM5            | 2.11 | 3.45E-04 | 0.0048 |
| SLC39A14         | 2.11 | 1.34E-03 | 0.0088 |
| BRIP1            | 2.11 | 1.93E-04 | 0.0039 |
| SET              | 2.11 | 1.69E-04 | 0.0038 |
| TXNDC5           | 2.11 | 5.08E-04 | 0.0056 |
| ARMCX1           | 2.11 | 2.06E-02 | 0.0472 |
| AC051619.7       | 2.11 | 8.33E-03 | 0.0254 |
| C20orf27         | 2.11 | 1.67E-02 | 0.0405 |
| ENST000002996130 | 2.11 | 1.39E-04 | 0.0036 |
| HIST4H4          | 2.11 | 1.23E-04 | 0.0034 |
| ENST000003328580 | 2.11 | 1.63E-03 | 0.0099 |
| RRAGD            | 2.11 | 3.03E-04 | 0.0046 |
| ENST000003192482 | 2.10 | 2.00E-04 | 0.0040 |
| COX5A            | 2.10 | 2.96E-04 | 0.0046 |
| ENST000002855180 | 2.10 | 9.38E-05 | 0.0031 |
| AHI1             | 2.10 | 4.62E-03 | 0.0176 |
| CU638689.5       | 2.10 | 4.01E-03 | 0.0162 |
| ATAD3A           | 2.10 | 5.43E-04 | 0.0058 |
| GEN1             | 2.10 | 6.65E-05 | 0.0029 |
| ATP2A1-AS1       | 2.10 | 1.21E-02 | 0.0326 |
| EEF1AKMT4        | 2.10 | 1.83E-03 | 0.0104 |
| PSMD14           | 2.10 | 1.50E-04 | 0.0036 |
| TRIP6            | 2.10 | 3.69E-04 | 0.0049 |
| FBXW9            | 2.10 | 1.19E-03 | 0.0083 |
| SLC17A9          | 2.10 | 7.51E-04 | 0.0067 |
| ENST000002718360 | 2.10 | 2.05E-02 | 0.0470 |
| ACAT2            | 2.10 | 9.62E-05 | 0.0031 |
| PA2G4            | 2.10 | 1.66E-04 | 0.0037 |
| SEC61G           | 2.10 | 9.57E-05 | 0.0031 |
| ENST000003167881 | 2.09 | 8.56E-05 | 0.0030 |
| MTHFD1L          | 2.09 | 9.09E-04 | 0.0074 |
| ARL3             | 2.09 | 3.99E-04 | 0.0051 |
| PPIAP45          | 2.09 | 4.60E-03 | 0.0176 |
| ENST000002965950 | 2.09 | 1.78E-04 | 0.0039 |
| ENST000003889950 | 2.09 | 2.25E-04 | 0.0041 |
| NCL              | 2.09 | 8.63E-05 | 0.0030 |
| HSPG2            | 2.09 | 3.14E-03 | 0.0140 |
| AC099850.1       | 2.09 | 1.43E-03 | 0.0092 |
| ERAL1            | 2.09 | 2.02E-04 | 0.0040 |
| NUP58            | 2.09 | 1.11E-04 | 0.0033 |
| MRPL13           | 2.08 | 1.33E-04 | 0.0035 |
| CYC1             | 2.08 | 2.05E-04 | 0.0040 |

|                  |      |          |        |
|------------------|------|----------|--------|
| MRPL36           | 2.08 | 1.81E-03 | 0.0104 |
| TXNDC17          | 2.08 | 2.21E-04 | 0.0041 |
| INSIG1           | 2.08 | 8.86E-05 | 0.0031 |
| YWHAQ            | 2.08 | 2.08E-04 | 0.0040 |
| CSTF2            | 2.08 | 2.89E-04 | 0.0045 |
| SH2D2A           | 2.08 | 7.12E-04 | 0.0065 |
| FAM207A          | 2.08 | 5.69E-03 | 0.0200 |
| MIR4435-2HG      | 2.08 | 3.27E-04 | 0.0047 |
| TNFRSF21         | 2.08 | 1.22E-02 | 0.0326 |
| UQCRQ            | 2.08 | 8.98E-05 | 0.0031 |
| NFE2L3           | 2.08 | 1.35E-04 | 0.0035 |
| UQCRC1           | 2.07 | 1.05E-04 | 0.0033 |
| KDEL1            | 2.07 | 2.14E-02 | 0.0485 |
| NLE1             | 2.07 | 9.15E-05 | 0.0031 |
| NCAPH2           | 2.07 | 9.81E-05 | 0.0031 |
| PAK1IP1          | 2.07 | 8.67E-04 | 0.0072 |
| BSPRY            | 2.07 | 5.11E-03 | 0.0187 |
| ENST000002587871 | 2.07 | 3.40E-04 | 0.0048 |
| SLC25A5          | 2.07 | 1.28E-04 | 0.0035 |
| MEST             | 2.07 | 1.85E-02 | 0.0436 |
| WRAP53           | 2.07 | 2.46E-04 | 0.0042 |
| AL109918.1       | 2.07 | 6.45E-04 | 0.0062 |
| PHF6             | 2.07 | 4.30E-04 | 0.0052 |
| SGPP2            | 2.07 | 4.46E-04 | 0.0053 |
| TUBAP2           | 2.07 | 6.67E-03 | 0.0221 |
| U62317.2         | 2.06 | 1.85E-03 | 0.0105 |
| CELSR3           | 2.06 | 4.00E-03 | 0.0161 |
| TRIO             | 2.06 | 2.09E-03 | 0.0112 |
| ENST000003601280 | 2.06 | 3.24E-04 | 0.0047 |
| ENST000003010680 | 2.06 | 4.10E-03 | 0.0164 |
| FANCC            | 2.06 | 1.99E-04 | 0.0040 |
| HSPBP1           | 2.06 | 1.61E-03 | 0.0098 |
| TNS3             | 2.06 | 7.13E-03 | 0.0230 |
| CTPS1            | 2.06 | 2.82E-04 | 0.0045 |
| ABCG1            | 2.06 | 1.28E-02 | 0.0337 |
| AGK              | 2.06 | 1.26E-04 | 0.0035 |
| GNPNAT1          | 2.06 | 6.15E-04 | 0.0061 |
| HIST1H1D         | 2.06 | 9.81E-05 | 0.0031 |
| CHN1             | 2.06 | 7.59E-03 | 0.0239 |
| ENST000002913580 | 2.05 | 1.91E-03 | 0.0107 |
| ILF2             | 2.05 | 1.09E-04 | 0.0033 |
| NRAV             | 2.05 | 1.02E-02 | 0.0290 |
| PLOD1            | 2.05 | 4.53E-04 | 0.0054 |
| DKC1             | 2.05 | 1.77E-04 | 0.0039 |
| RRP12            | 2.05 | 3.71E-04 | 0.0049 |
| PARK7            | 2.05 | 7.39E-05 | 0.0029 |
| ALDH18A1         | 2.04 | 7.45E-05 | 0.0029 |
| NCAPD2           | 2.04 | 2.26E-04 | 0.0041 |
| LAPTM4B          | 2.04 | 3.09E-04 | 0.0046 |
| ZNF165           | 2.04 | 3.54E-03 | 0.0150 |

|                  |      |          |        |
|------------------|------|----------|--------|
| PEX26            | 2.04 | 1.39E-04 | 0.0036 |
| ENST000003588960 | 2.04 | 2.34E-03 | 0.0120 |
| COX17            | 2.04 | 7.16E-05 | 0.0029 |
| CPNE2            | 2.04 | 6.47E-04 | 0.0063 |
| PSMC3            | 2.04 | 9.48E-05 | 0.0031 |
| PPIA             | 2.04 | 8.48E-05 | 0.0030 |
| DPP3             | 2.04 | 2.24E-04 | 0.0041 |
| EFCAB11          | 2.04 | 3.07E-03 | 0.0139 |
| ENST000003206761 | 2.03 | 7.13E-05 | 0.0029 |
| KCTD12           | 2.03 | 1.07E-02 | 0.0299 |
| ENST000002373051 | 2.03 | 1.71E-02 | 0.0412 |
| ZFP92            | 2.03 | 4.00E-03 | 0.0161 |
| PRELID2          | 2.03 | 2.35E-03 | 0.0121 |
| JUNB             | 2.03 | 5.87E-04 | 0.0060 |
| ENST000002615070 | 2.02 | 5.05E-04 | 0.0056 |
| NLN              | 2.02 | 2.23E-03 | 0.0117 |
| LAP3             | 2.02 | 2.73E-04 | 0.0044 |
| PTPN6            | 2.02 | 6.60E-04 | 0.0063 |
| CREM             | 2.02 | 2.49E-03 | 0.0124 |
| PTPN11           | 2.02 | 6.91E-05 | 0.0029 |
| ENST000003047861 | 2.02 | 1.25E-04 | 0.0035 |
| ERH              | 2.02 | 1.41E-04 | 0.0036 |
| CTH              | 2.02 | 8.28E-03 | 0.0253 |
| GNL3             | 2.02 | 4.38E-04 | 0.0053 |
| ENST000002702251 | 2.02 | 3.98E-04 | 0.0051 |
| MPZL3            | 2.02 | 1.34E-04 | 0.0035 |
| LRRC59           | 2.02 | 1.99E-04 | 0.0040 |
| PRMT5            | 2.02 | 1.15E-03 | 0.0082 |
| TUBB2A           | 2.02 | 4.42E-03 | 0.0172 |
| RCN1             | 2.01 | 8.83E-04 | 0.0073 |
| ALCAM            | 2.01 | 1.35E-03 | 0.0089 |
| RNU11            | 2.01 | 1.10E-02 | 0.0304 |
| C21orf58         | 2.01 | 3.46E-03 | 0.0148 |
| COQ2             | 2.01 | 1.32E-04 | 0.0035 |
| ALDOC            | 2.01 | 5.92E-04 | 0.0060 |
| ENST000002938312 | 2.01 | 1.79E-04 | 0.0039 |
| POLR2H           | 2.01 | 1.64E-04 | 0.0037 |
| MRC2             | 2.01 | 8.54E-03 | 0.0258 |
| RRP1             | 2.01 | 2.24E-04 | 0.0041 |
| ENST000002253082 | 2.01 | 1.47E-03 | 0.0093 |
| GALNT2           | 2.01 | 3.30E-04 | 0.0047 |
| ENST000003113370 | 2.01 | 1.41E-03 | 0.0091 |
| ACAT1            | 2.01 | 9.52E-05 | 0.0031 |
| NOLC1            | 2.01 | 1.10E-03 | 0.0080 |
| MAP3K21          | 2.01 | 4.30E-04 | 0.0052 |
| SNHG16           | 2.01 | 7.50E-04 | 0.0067 |
| SAAL1            | 2.01 | 3.60E-04 | 0.0049 |
| LSM5             | 2.00 | 1.86E-04 | 0.0039 |
| FUT11            | 2.00 | 3.01E-04 | 0.0046 |
| ENST000002674151 | 2.00 | 4.73E-04 | 0.0055 |

|                  |      |          |        |
|------------------|------|----------|--------|
| AC090825.1       | 2.00 | 3.39E-03 | 0.0146 |
| GSTT1            | 2.00 | 7.70E-03 | 0.0241 |
| Z83847.1         | 2.00 | 1.16E-02 | 0.0316 |
| CCT4             | 2.00 | 7.98E-05 | 0.0030 |
| PLXNB2           | 2.00 | 9.21E-03 | 0.0270 |
| VPS25            | 2.00 | 1.10E-04 | 0.0033 |
| CHCHD4           | 2.00 | 1.99E-04 | 0.0040 |
| ENST000002422572 | 2.00 | 1.52E-03 | 0.0095 |
| HECTD2           | 1.99 | 5.67E-04 | 0.0059 |
| UBE2M            | 1.99 | 4.18E-04 | 0.0052 |
| MFSD10           | 1.99 | 3.04E-04 | 0.0046 |
| EPB41L2          | 1.99 | 3.20E-03 | 0.0142 |
| TIFA             | 1.99 | 5.54E-04 | 0.0059 |
| ENST000003163860 | 1.99 | 4.56E-04 | 0.0054 |
| RNVU1-1          | 1.99 | 8.87E-03 | 0.0264 |
| ENST000003204810 | 1.99 | 4.81E-03 | 0.0180 |
| AFMID            | 1.99 | 4.22E-04 | 0.0052 |
| ENST000003239970 | 1.99 | 8.42E-03 | 0.0256 |
| PRPS2            | 1.99 | 1.68E-04 | 0.0038 |
| NUP155           | 1.99 | 1.54E-04 | 0.0036 |
| HLF              | 1.98 | 9.51E-04 | 0.0076 |
| NASP             | 1.98 | 8.41E-05 | 0.0030 |
| SLC39A1          | 1.98 | 1.99E-04 | 0.0040 |
| ENST000002428270 | 1.98 | 9.58E-04 | 0.0076 |
| AIMP2            | 1.98 | 2.43E-03 | 0.0123 |
| DCLRE1B          | 1.98 | 7.39E-04 | 0.0066 |
| SNORD99          | 1.98 | 1.17E-02 | 0.0317 |
| ENST000003485020 | 1.98 | 9.57E-05 | 0.0031 |
| ATP5MD           | 1.98 | 1.33E-04 | 0.0035 |
| RPF2             | 1.98 | 2.13E-03 | 0.0114 |
| SERBP1           | 1.98 | 1.61E-04 | 0.0037 |
| MAK16            | 1.97 | 6.58E-04 | 0.0063 |
| ENST000003255992 | 1.97 | 3.07E-04 | 0.0046 |
| HIRIP3           | 1.97 | 6.46E-04 | 0.0063 |
| ZSCAN20          | 1.97 | 8.32E-04 | 0.0071 |
| CCT8             | 1.97 | 3.78E-03 | 0.0156 |
| AC016026.1       | 1.97 | 5.45E-03 | 0.0195 |
| ENST000003514500 | 1.97 | 1.50E-04 | 0.0036 |
| NSD2             | 1.97 | 9.49E-05 | 0.0031 |
| AL365181.3       | 1.97 | 5.86E-03 | 0.0204 |
| NDUFA7           | 1.97 | 3.31E-04 | 0.0047 |
| PDE4A            | 1.97 | 5.31E-03 | 0.0191 |
| ENST000002679502 | 1.97 | 1.54E-04 | 0.0036 |
| ENST000003104540 | 1.96 | 9.86E-04 | 0.0077 |
| ENST000003033050 | 1.96 | 4.83E-04 | 0.0055 |
| RNVU1-7          | 1.96 | 2.47E-04 | 0.0042 |
| KCTD11           | 1.96 | 5.08E-04 | 0.0056 |
| TAGLN2           | 1.96 | 9.92E-04 | 0.0077 |
| MAP2K3           | 1.96 | 3.44E-04 | 0.0048 |
| CCDC51           | 1.96 | 5.33E-04 | 0.0058 |

|                  |      |          |        |
|------------------|------|----------|--------|
| PSMB2            | 1.96 | 3.14E-04 | 0.0046 |
| ENST000002489240 | 1.96 | 6.27E-04 | 0.0062 |
| NCKIPSD          | 1.96 | 3.01E-04 | 0.0046 |
| RPS10            | 1.96 | 1.52E-04 | 0.0036 |
| HSPA8P3          | 1.96 | 6.62E-03 | 0.0220 |
| RANGAP1          | 1.95 | 3.61E-04 | 0.0049 |
| RSPH3            | 1.95 | 2.12E-04 | 0.0041 |
| LRP8             | 1.95 | 2.86E-03 | 0.0134 |
| ENST000003155672 | 1.95 | 3.03E-04 | 0.0046 |
| PAM              | 1.95 | 1.55E-04 | 0.0036 |
| NHP2             | 1.95 | 4.88E-04 | 0.0055 |
| TUFM             | 1.95 | 9.71E-05 | 0.0031 |
| AL590399.1       | 1.95 | 2.97E-03 | 0.0136 |
| MLF2             | 1.95 | 3.34E-04 | 0.0047 |
| CD69             | 1.95 | 2.58E-04 | 0.0043 |
| HMBS             | 1.95 | 2.87E-03 | 0.0134 |
| PPP1CC           | 1.95 | 3.47E-04 | 0.0048 |
| GOT1             | 1.95 | 1.06E-04 | 0.0033 |
| FBXL19           | 1.94 | 3.39E-04 | 0.0048 |
| MEX3D            | 1.94 | 5.50E-03 | 0.0196 |
| AL021068.1       | 1.94 | 1.04E-02 | 0.0293 |
| HIST1H2BN        | 1.94 | 9.32E-04 | 0.0075 |
| FERMT2           | 1.94 | 6.81E-03 | 0.0224 |
| UAP1             | 1.94 | 4.59E-04 | 0.0054 |
| AC005229.4       | 1.94 | 2.89E-03 | 0.0135 |
| IKBIP            | 1.94 | 5.73E-04 | 0.0059 |
| HMG2             | 1.94 | 2.31E-04 | 0.0042 |
| VAR5             | 1.94 | 9.13E-05 | 0.0031 |
| INSIG2           | 1.94 | 6.68E-04 | 0.0064 |
| ENST000003234410 | 1.94 | 1.21E-02 | 0.0325 |
| VSIG10           | 1.94 | 3.23E-04 | 0.0047 |
| GTPBP4           | 1.94 | 2.26E-04 | 0.0041 |
| SYP              | 1.94 | 8.34E-04 | 0.0071 |
| CCDC18           | 1.94 | 1.38E-04 | 0.0035 |
| GADD45GIP1       | 1.94 | 1.34E-04 | 0.0035 |
| C19orf38         | 1.94 | 1.69E-02 | 0.0409 |
| ENST000002494420 | 1.93 | 1.54E-04 | 0.0036 |
| ACY1             | 1.93 | 1.50E-03 | 0.0094 |
| ENST000002625070 | 1.93 | 6.95E-04 | 0.0065 |
| ADD2             | 1.93 | 1.63E-02 | 0.0398 |
| PSMB6            | 1.93 | 2.09E-04 | 0.0040 |
| SF3B6            | 1.93 | 1.41E-04 | 0.0036 |
| TUBA4A           | 1.93 | 9.54E-04 | 0.0076 |
| PSMB3            | 1.93 | 2.42E-04 | 0.0042 |
| SNRPD3           | 1.93 | 1.56E-04 | 0.0036 |
| NCAPD3           | 1.93 | 4.43E-04 | 0.0053 |
| LSM3             | 1.93 | 3.28E-04 | 0.0047 |
| ENST000002859680 | 1.93 | 2.00E-04 | 0.0040 |
| ENST000003022710 | 1.93 | 2.73E-03 | 0.0131 |
| MRPL3            | 1.93 | 4.03E-04 | 0.0051 |

|                  |      |          |        |
|------------------|------|----------|--------|
| GPATCH4          | 1.93 | 8.02E-04 | 0.0069 |
| ZNF593           | 1.93 | 1.59E-03 | 0.0097 |
| AL133338.1       | 1.93 | 3.77E-03 | 0.0156 |
| TIMM17A          | 1.93 | 2.36E-04 | 0.0042 |
| AC129492.1       | 1.92 | 1.73E-03 | 0.0102 |
| RUVBL1           | 1.92 | 3.03E-04 | 0.0046 |
| BRIX1            | 1.92 | 4.73E-04 | 0.0055 |
| GBAP1            | 1.92 | 7.21E-04 | 0.0065 |
| FAM173A          | 1.92 | 6.43E-04 | 0.0062 |
| GEMIN7           | 1.92 | 2.38E-04 | 0.0042 |
| ENST000001997062 | 1.92 | 1.71E-03 | 0.0101 |
| ABCE1            | 1.92 | 3.06E-04 | 0.0046 |
| CCDC34           | 1.92 | 7.63E-03 | 0.0240 |
| RMI1             | 1.91 | 1.83E-04 | 0.0039 |
| ENST000002316683 | 1.91 | 1.39E-03 | 0.0090 |
| ENST000003131150 | 1.91 | 1.70E-03 | 0.0101 |
| TMEM237          | 1.91 | 1.86E-03 | 0.0105 |
| ENST000003057470 | 1.91 | 4.97E-04 | 0.0056 |
| P3H3             | 1.91 | 1.17E-02 | 0.0317 |
| SMC4             | 1.91 | 3.47E-04 | 0.0048 |
| RBPJ             | 1.91 | 1.31E-04 | 0.0035 |
| NEMP1            | 1.91 | 2.40E-04 | 0.0042 |
| HES6             | 1.91 | 2.10E-02 | 0.0477 |
| MORN2            | 1.91 | 1.32E-02 | 0.0343 |
| PHB2             | 1.91 | 1.47E-04 | 0.0036 |
| ENST000002167560 | 1.91 | 2.84E-04 | 0.0045 |
| C1orf112         | 1.91 | 7.82E-04 | 0.0069 |
| PFDN4            | 1.91 | 2.82E-04 | 0.0045 |
| IFT46            | 1.91 | 2.56E-04 | 0.0043 |
| LINC01465        | 1.91 | 4.67E-03 | 0.0178 |
| SMIM30           | 1.90 | 3.03E-04 | 0.0046 |
| SNORD82          | 1.90 | 5.58E-03 | 0.0197 |
| COX6A1           | 1.90 | 1.45E-04 | 0.0036 |
| ENST000001695510 | 1.90 | 7.86E-03 | 0.0245 |
| DDX21            | 1.90 | 4.94E-04 | 0.0056 |
| YRDC             | 1.90 | 3.24E-04 | 0.0047 |
| SLC9A7           | 1.90 | 1.11E-03 | 0.0081 |
| HMGB1P5          | 1.90 | 2.87E-04 | 0.0045 |
| FKBPL            | 1.90 | 4.54E-03 | 0.0175 |
| ENST000003103800 | 1.90 | 3.49E-03 | 0.0149 |
| CALCRL           | 1.90 | 7.01E-03 | 0.0228 |
| CENPX            | 1.90 | 4.54E-03 | 0.0175 |
| LSM2             | 1.90 | 1.33E-03 | 0.0088 |
| MLH1             | 1.90 | 1.05E-04 | 0.0033 |
| AKAP5            | 1.90 | 1.45E-02 | 0.0367 |
| INSR             | 1.89 | 6.43E-04 | 0.0062 |
| LSM12P1          | 1.89 | 3.35E-03 | 0.0146 |
| ARHGAP31         | 1.89 | 5.37E-03 | 0.0193 |
| STAT3            | 1.89 | 3.09E-04 | 0.0046 |
| ENST000002969330 | 1.89 | 3.37E-04 | 0.0048 |

|                  |      |          |        |
|------------------|------|----------|--------|
| AC026401.3       | 1.89 | 1.19E-03 | 0.0083 |
| AC243742.3       | 1.89 | 1.19E-03 | 0.0083 |
| PTPRG            | 1.89 | 5.00E-03 | 0.0185 |
| LYPLA1           | 1.89 | 1.23E-04 | 0.0034 |
| NRSN2-AS1        | 1.89 | 1.09E-03 | 0.0080 |
| PEA15            | 1.89 | 2.64E-04 | 0.0044 |
| TKFC             | 1.89 | 2.24E-04 | 0.0041 |
| TNIP3            | 1.88 | 1.26E-03 | 0.0086 |
| NPM1             | 1.88 | 3.12E-04 | 0.0046 |
| CHSY1            | 1.88 | 3.10E-03 | 0.0140 |
| SINHCAF          | 1.88 | 9.64E-05 | 0.0031 |
| MTCH2            | 1.87 | 2.22E-04 | 0.0041 |
| PRXL2A           | 1.87 | 8.61E-04 | 0.0072 |
| ENST000002823440 | 1.87 | 2.34E-04 | 0.0042 |
| IARS             | 1.87 | 1.05E-03 | 0.0079 |
| ENST000000751201 | 1.87 | 1.08E-04 | 0.0033 |
| MLF1             | 1.87 | 8.17E-03 | 0.0251 |
| STOM             | 1.87 | 2.65E-03 | 0.0129 |
| RFTN1            | 1.87 | 2.91E-04 | 0.0045 |
| GNPDA1           | 1.87 | 2.42E-03 | 0.0122 |
| MACROD1          | 1.87 | 1.65E-03 | 0.0099 |
| ETFB             | 1.87 | 1.49E-04 | 0.0036 |
| GNG5             | 1.87 | 1.05E-03 | 0.0079 |
| HYAL2            | 1.87 | 8.09E-04 | 0.0070 |
| ACTL6A           | 1.87 | 1.20E-04 | 0.0034 |
| NABP2            | 1.87 | 3.14E-04 | 0.0046 |
| DHX32            | 1.87 | 6.94E-04 | 0.0065 |
| RAB11FIP5        | 1.87 | 1.03E-03 | 0.0078 |
| EARS2            | 1.86 | 9.96E-04 | 0.0077 |
| MPHOSPH6         | 1.86 | 2.01E-04 | 0.0040 |
| BNIP3L           | 1.86 | 2.35E-04 | 0.0042 |
| EIF5A            | 1.86 | 4.13E-03 | 0.0165 |
| PLCXD1           | 1.86 | 2.96E-03 | 0.0136 |
| MIR17HG          | 1.86 | 1.53E-03 | 0.0095 |
| MRPL51           | 1.86 | 2.37E-04 | 0.0042 |
| PPP5C            | 1.86 | 2.06E-04 | 0.0040 |
| CD72             | 1.86 | 8.41E-04 | 0.0071 |
| AP002990.1       | 1.86 | 3.23E-03 | 0.0142 |
| RRM2B            | 1.86 | 6.74E-04 | 0.0064 |
| NDUF88           | 1.86 | 2.19E-03 | 0.0115 |
| MAGOHB           | 1.86 | 1.28E-03 | 0.0086 |
| DARS             | 1.86 | 3.05E-04 | 0.0046 |
| PRDX1            | 1.86 | 2.87E-03 | 0.0134 |
| LONRF1           | 1.86 | 3.94E-04 | 0.0050 |
| OAZ1             | 1.86 | 1.13E-04 | 0.0033 |
| EED              | 1.86 | 1.50E-04 | 0.0036 |
| ZEB2             | 1.86 | 4.18E-04 | 0.0052 |
| UQCRH            | 1.86 | 1.61E-04 | 0.0037 |
| CCT6A            | 1.86 | 1.49E-04 | 0.0036 |
| ENST000002606651 | 1.86 | 3.15E-04 | 0.0046 |

|                  |      |          |        |
|------------------|------|----------|--------|
| BOLA2B           | 1.86 | 2.00E-04 | 0.0040 |
| TIMM50           | 1.85 | 1.82E-04 | 0.0039 |
| EIF2D            | 1.85 | 1.10E-04 | 0.0033 |
| SLC16A1          | 1.85 | 8.29E-04 | 0.0071 |
| PPAT             | 1.85 | 7.87E-04 | 0.0069 |
| RAB8B            | 1.85 | 7.53E-04 | 0.0067 |
| SNX21            | 1.85 | 8.21E-03 | 0.0252 |
| TFR2             | 1.85 | 8.94E-03 | 0.0265 |
| ROMO1            | 1.85 | 2.56E-04 | 0.0043 |
| FADS1            | 1.85 | 2.81E-03 | 0.0133 |
| ENST000003248711 | 1.85 | 1.40E-03 | 0.0091 |
| HPRT1            | 1.85 | 4.95E-04 | 0.0056 |
| ABCB6            | 1.85 | 1.97E-04 | 0.0040 |
| SPTY2D1OS        | 1.85 | 7.47E-03 | 0.0237 |
| COX8A            | 1.85 | 7.07E-04 | 0.0065 |
| GARS             | 1.85 | 1.64E-03 | 0.0099 |
| HSD17B12         | 1.85 | 1.00E-02 | 0.0286 |
| MRPS23           | 1.84 | 4.47E-04 | 0.0053 |
| TEX30            | 1.84 | 3.56E-04 | 0.0048 |
| MCAT             | 1.84 | 3.53E-03 | 0.0150 |
| RCC2             | 1.84 | 1.72E-04 | 0.0038 |
| SAMD1            | 1.84 | 1.82E-03 | 0.0104 |
| CDKN2AIPNL       | 1.84 | 1.69E-04 | 0.0038 |
| PELO             | 1.84 | 1.73E-03 | 0.0102 |
| TIMM23           | 1.84 | 1.13E-04 | 0.0033 |
| AP3S1            | 1.84 | 3.92E-04 | 0.0050 |
| FDX2             | 1.84 | 1.17E-03 | 0.0083 |
| ENST000002197820 | 1.84 | 6.02E-03 | 0.0207 |
| MAGEF1           | 1.84 | 6.30E-04 | 0.0062 |
| PLA2G16          | 1.84 | 7.41E-03 | 0.0235 |
| PPA1             | 1.84 | 2.60E-04 | 0.0044 |
| CIAO2B           | 1.84 | 4.93E-04 | 0.0056 |
| MCOLN2           | 1.84 | 1.77E-02 | 0.0423 |
| AC112496.1       | 1.84 | 3.06E-03 | 0.0139 |
| MZB1             | 1.83 | 1.84E-02 | 0.0435 |
| CLUH             | 1.83 | 3.66E-04 | 0.0049 |
| EHBP1L1          | 1.83 | 3.99E-04 | 0.0051 |
| OTUB2            | 1.83 | 4.48E-03 | 0.0173 |
| CYB5R2           | 1.83 | 6.71E-03 | 0.0222 |
| SLC25A15         | 1.83 | 3.31E-04 | 0.0047 |
| CYSTM1           | 1.83 | 6.34E-04 | 0.0062 |
| DSN1             | 1.83 | 3.05E-04 | 0.0046 |
| ENST000002979330 | 1.83 | 5.79E-04 | 0.0060 |
| TRIM6            | 1.82 | 1.92E-02 | 0.0448 |
| TPM4             | 1.82 | 2.12E-04 | 0.0041 |
| YBX3             | 1.82 | 9.53E-03 | 0.0277 |
| DNAJB5           | 1.82 | 1.92E-02 | 0.0448 |
| EIF3I            | 1.82 | 1.58E-04 | 0.0037 |
| ENST000003165190 | 1.82 | 2.35E-04 | 0.0042 |
| CYBRD1           | 1.82 | 3.35E-03 | 0.0146 |

|                  |      |          |        |
|------------------|------|----------|--------|
| ENST000002624322 | 1.82 | 2.36E-04 | 0.0042 |
| POLD3            | 1.82 | 1.80E-04 | 0.0039 |
| AHSA1            | 1.82 | 1.90E-04 | 0.0039 |
| GSTO1            | 1.82 | 6.37E-04 | 0.0062 |
| FAAP24           | 1.82 | 1.04E-03 | 0.0079 |
| GAR1             | 1.82 | 1.18E-03 | 0.0083 |
| ENST000002167740 | 1.82 | 1.81E-04 | 0.0039 |
| RNF19A           | 1.82 | 2.46E-03 | 0.0124 |
| UBE2V2           | 1.81 | 2.11E-04 | 0.0041 |
| TOMM6            | 1.81 | 1.86E-04 | 0.0039 |
| ELAVL1           | 1.81 | 1.21E-04 | 0.0034 |
| ING2             | 1.81 | 3.13E-04 | 0.0046 |
| ELOVL4           | 1.81 | 2.13E-02 | 0.0483 |
| PCK2             | 1.81 | 1.09E-03 | 0.0080 |
| VBP1             | 1.81 | 2.59E-04 | 0.0044 |
| F5               | 1.81 | 4.11E-03 | 0.0164 |
| MVK              | 1.81 | 3.77E-04 | 0.0050 |
| TTLL12           | 1.81 | 2.03E-04 | 0.0040 |
| LSM12            | 1.81 | 1.44E-04 | 0.0036 |
| HSPH1            | 1.81 | 2.02E-04 | 0.0040 |
| GJB6             | 1.81 | 3.00E-03 | 0.0137 |
| HMGB1            | 1.81 | 2.00E-04 | 0.0040 |
| SLCO4A1          | 1.81 | 2.76E-04 | 0.0044 |
| ENST000002660140 | 1.81 | 2.47E-03 | 0.0124 |
| HAT1             | 1.80 | 4.06E-04 | 0.0051 |
| RCCD1            | 1.80 | 4.95E-04 | 0.0056 |
| PSMD3            | 1.80 | 2.39E-04 | 0.0042 |
| DUSP23           | 1.80 | 5.46E-04 | 0.0058 |
| RBM19            | 1.80 | 1.30E-04 | 0.0035 |
| PSMB1            | 1.80 | 2.77E-04 | 0.0044 |
| XRCC6            | 1.79 | 1.88E-04 | 0.0039 |
| BANF1            | 1.79 | 1.44E-02 | 0.0365 |
| MSH6             | 1.79 | 1.61E-04 | 0.0037 |
| ENST000002161941 | 1.79 | 1.90E-04 | 0.0039 |
| PPIP5K1          | 1.79 | 4.89E-03 | 0.0182 |
| NRAS             | 1.79 | 2.29E-04 | 0.0042 |
| ENST000002653040 | 1.79 | 7.06E-04 | 0.0065 |
| PDAP1            | 1.79 | 3.55E-04 | 0.0048 |
| ENST000003387581 | 1.79 | 1.72E-03 | 0.0101 |
| FANCE            | 1.79 | 7.83E-04 | 0.0069 |
| ANKRD9           | 1.79 | 1.46E-03 | 0.0093 |
| WARS2            | 1.79 | 3.09E-04 | 0.0046 |
| PFKFB3           | 1.79 | 2.12E-03 | 0.0113 |
| DLD              | 1.79 | 1.16E-04 | 0.0034 |
| ENST000003268400 | 1.79 | 1.45E-02 | 0.0368 |
| TSPYL5           | 1.79 | 1.43E-02 | 0.0364 |
| PIGA             | 1.79 | 2.35E-04 | 0.0042 |
| OTUD7B           | 1.79 | 1.37E-04 | 0.0035 |
| MRM3             | 1.79 | 4.09E-04 | 0.0051 |
| TMEM217          | 1.78 | 1.48E-02 | 0.0372 |

|                  |      |          |        |
|------------------|------|----------|--------|
| ATP5MF           | 1.78 | 2.17E-04 | 0.0041 |
| MAGI1            | 1.78 | 6.59E-03 | 0.0220 |
| FH               | 1.78 | 2.80E-04 | 0.0045 |
| ANKRD7           | 1.78 | 6.71E-03 | 0.0222 |
| UBB              | 1.78 | 1.79E-04 | 0.0039 |
| ALKBH5           | 1.78 | 1.30E-04 | 0.0035 |
| AC245033.4       | 1.78 | 6.87E-03 | 0.0226 |
| SOX4             | 1.78 | 3.54E-03 | 0.0150 |
| PLEKHH1          | 1.78 | 4.81E-03 | 0.0180 |
| RUNX3            | 1.78 | 3.48E-04 | 0.0048 |
| NECTIN3          | 1.78 | 7.52E-03 | 0.0238 |
| ENST000002585342 | 1.78 | 8.02E-03 | 0.0248 |
| ENST000002222542 | 1.77 | 1.09E-02 | 0.0302 |
| UTP20            | 1.77 | 6.12E-04 | 0.0061 |
| LINC01952        | 1.77 | 1.49E-02 | 0.0373 |
| EFNA3            | 1.77 | 8.36E-03 | 0.0254 |
| APOO             | 1.77 | 3.20E-04 | 0.0047 |
| TOMM22           | 1.77 | 1.92E-04 | 0.0039 |
| TRMT10C          | 1.77 | 4.83E-04 | 0.0055 |
| PSMB7            | 1.77 | 2.79E-04 | 0.0045 |
| CDC123           | 1.77 | 5.28E-04 | 0.0057 |
| MRPS18A          | 1.77 | 2.35E-04 | 0.0042 |
| HCG20            | 1.77 | 1.20E-02 | 0.0323 |
| WSB1             | 1.77 | 3.80E-04 | 0.0050 |
| ENST000003060610 | 1.77 | 8.16E-03 | 0.0251 |
| BZW2             | 1.77 | 1.25E-04 | 0.0035 |
| ASL              | 1.76 | 5.69E-04 | 0.0059 |
| MRPS17           | 1.76 | 1.86E-04 | 0.0039 |
| FZD6             | 1.76 | 3.49E-04 | 0.0048 |
| HNRNPC           | 1.76 | 1.53E-04 | 0.0036 |
| GPR108           | 1.76 | 1.24E-02 | 0.0330 |
| PES1             | 1.76 | 2.43E-03 | 0.0123 |
| FOXRED2          | 1.76 | 4.99E-03 | 0.0184 |
| GCHFR            | 1.76 | 4.25E-04 | 0.0052 |
| DCTN6            | 1.76 | 2.76E-04 | 0.0044 |
| PSMA1            | 1.76 | 1.47E-04 | 0.0036 |
| GRPEL1           | 1.76 | 7.19E-04 | 0.0065 |
| EIF4H            | 1.76 | 1.25E-04 | 0.0035 |
| PHLPP1           | 1.76 | 7.62E-03 | 0.0240 |
| PSMA4            | 1.76 | 1.51E-04 | 0.0036 |
| PSMD8            | 1.76 | 5.60E-04 | 0.0059 |
| TNFSF4           | 1.76 | 2.88E-03 | 0.0134 |
| TIGIT            | 1.76 | 8.57E-04 | 0.0072 |
| AK7              | 1.76 | 4.11E-03 | 0.0164 |
| BIK              | 1.76 | 5.68E-03 | 0.0200 |
| ZNF35            | 1.76 | 2.03E-03 | 0.0110 |
| ENST000003296080 | 1.76 | 5.10E-03 | 0.0187 |
| GTDC1            | 1.76 | 3.52E-04 | 0.0048 |
| TIMM13           | 1.76 | 4.86E-04 | 0.0055 |
| NUP62            | 1.75 | 2.34E-03 | 0.0120 |

|                  |      |          |        |
|------------------|------|----------|--------|
| ZNF670           | 1.75 | 4.25E-04 | 0.0052 |
| ENOPH1           | 1.75 | 2.47E-04 | 0.0042 |
| PARP2            | 1.75 | 1.46E-04 | 0.0036 |
| RRP7A            | 1.75 | 2.14E-04 | 0.0041 |
| RF00003.26       | 1.75 | 1.19E-02 | 0.0321 |
| RF00003.41       | 1.75 | 1.19E-02 | 0.0321 |
| IL21R            | 1.75 | 5.21E-03 | 0.0190 |
| DNAJA1           | 1.75 | 1.78E-04 | 0.0039 |
| ATP5MC1          | 1.75 | 6.66E-04 | 0.0064 |
| YWHAH            | 1.75 | 2.50E-03 | 0.0124 |
| ENST000003401921 | 1.75 | 4.86E-03 | 0.0181 |
| NANP             | 1.75 | 4.10E-04 | 0.0051 |
| FBL              | 1.75 | 2.22E-04 | 0.0041 |
| LRRC75A-AS1      | 1.75 | 4.68E-04 | 0.0054 |
| AC084082.1       | 1.75 | 7.66E-03 | 0.0241 |
| STAP2            | 1.75 | 1.84E-03 | 0.0105 |
| ATP1B3           | 1.75 | 4.42E-04 | 0.0053 |
| ENST000003306510 | 1.74 | 9.07E-04 | 0.0074 |
| AL445231.1       | 1.74 | 6.24E-03 | 0.0212 |
| IMPA2            | 1.74 | 2.72E-03 | 0.0131 |
| CMSS1            | 1.74 | 1.33E-03 | 0.0088 |
| FASN             | 1.74 | 3.39E-04 | 0.0048 |
| NUP107           | 1.74 | 3.17E-04 | 0.0046 |
| PSMB5            | 1.74 | 1.73E-03 | 0.0102 |
| TFB2M            | 1.74 | 3.42E-03 | 0.0147 |
| SRM              | 1.74 | 1.41E-02 | 0.0360 |
| CYFIP1           | 1.73 | 4.61E-04 | 0.0054 |
| SCOC             | 1.73 | 2.82E-04 | 0.0045 |
| FOSB             | 1.73 | 2.66E-03 | 0.0129 |
| PRIM1            | 1.73 | 4.24E-04 | 0.0052 |
| DONSON           | 1.73 | 2.40E-04 | 0.0042 |
| CCDC6            | 1.73 | 2.14E-04 | 0.0041 |
| LRR1             | 1.73 | 7.05E-04 | 0.0065 |
| CCT3             | 1.73 | 2.07E-04 | 0.0040 |
| ENST000003464030 | 1.73 | 2.15E-02 | 0.0487 |
| LMAN1            | 1.73 | 8.11E-04 | 0.0070 |
| AL441992.1       | 1.73 | 7.64E-04 | 0.0068 |
| AP1S1            | 1.73 | 3.69E-03 | 0.0154 |
| KCNQ5-IT1        | 1.73 | 2.90E-03 | 0.0135 |
| TMEM56           | 1.73 | 9.34E-03 | 0.0273 |
| BCL2A1           | 1.73 | 1.37E-04 | 0.0035 |
| NME2             | 1.72 | 3.55E-04 | 0.0048 |
| FAM86C1          | 1.72 | 1.56E-02 | 0.0387 |
| AL121603.2       | 1.72 | 6.11E-04 | 0.0061 |
| PRRT3            | 1.72 | 6.91E-03 | 0.0226 |
| SLX1B            | 1.72 | 5.12E-04 | 0.0056 |
| PIGW             | 1.72 | 1.46E-03 | 0.0093 |
| SPTSSA           | 1.72 | 1.11E-03 | 0.0081 |
| USP54            | 1.72 | 1.29E-02 | 0.0339 |
| EIF4G1           | 1.72 | 2.99E-04 | 0.0046 |

|                  |      |          |        |
|------------------|------|----------|--------|
| RPL7L1           | 1.72 | 3.13E-04 | 0.0046 |
| SLC19A1          | 1.71 | 1.01E-03 | 0.0078 |
| BRWD1-AS2        | 1.71 | 9.19E-03 | 0.0270 |
| CYB5B            | 1.71 | 6.46E-04 | 0.0062 |
| C5orf30          | 1.71 | 2.10E-03 | 0.0113 |
| COA7             | 1.71 | 1.94E-04 | 0.0039 |
| KHSRP            | 1.71 | 2.30E-04 | 0.0042 |
| RAD51C           | 1.71 | 2.45E-04 | 0.0042 |
| GALM             | 1.71 | 1.52E-04 | 0.0036 |
| EZH2             | 1.71 | 3.50E-04 | 0.0048 |
| GEMIN4           | 1.71 | 2.52E-04 | 0.0043 |
| ZNF395           | 1.71 | 8.48E-04 | 0.0071 |
| CHCHD6           | 1.71 | 7.30E-04 | 0.0066 |
| POLDIP2          | 1.71 | 5.34E-04 | 0.0058 |
| ENST000003419800 | 1.71 | 2.53E-03 | 0.0125 |
| RAD18            | 1.71 | 2.51E-04 | 0.0043 |
| MTMR2            | 1.71 | 1.09E-03 | 0.0080 |
| PINX1            | 1.71 | 6.35E-04 | 0.0062 |
| MRPL47           | 1.71 | 4.62E-04 | 0.0054 |
| CKAP5            | 1.71 | 1.92E-04 | 0.0039 |
| EFEMP2           | 1.70 | 9.82E-03 | 0.0283 |
| MTBP             | 1.70 | 3.99E-04 | 0.0051 |
| ACTG1            | 1.70 | 3.03E-04 | 0.0046 |
| ENST000003122630 | 1.70 | 6.63E-04 | 0.0063 |
| ITSN1            | 1.70 | 9.46E-04 | 0.0076 |
| MRPS34           | 1.70 | 1.65E-04 | 0.0037 |
| ATP5MC3          | 1.70 | 1.54E-04 | 0.0036 |
| AC069499.1       | 1.70 | 3.16E-03 | 0.0141 |
| DUSP14           | 1.70 | 5.26E-04 | 0.0057 |
| SNORD12B         | 1.70 | 7.38E-03 | 0.0235 |
| SLIT3            | 1.70 | 6.30E-03 | 0.0213 |
| RCC1L            | 1.70 | 2.41E-04 | 0.0042 |
| ENSA             | 1.70 | 3.25E-04 | 0.0047 |
| ENST000003142620 | 1.70 | 2.43E-03 | 0.0123 |
| PSMC1            | 1.70 | 2.60E-04 | 0.0044 |
| PSMA3            | 1.70 | 1.95E-04 | 0.0040 |
| OXCT1            | 1.69 | 2.05E-03 | 0.0111 |
| UROD             | 1.69 | 4.63E-04 | 0.0054 |
| MRPL28           | 1.69 | 8.01E-03 | 0.0248 |
| NACC1            | 1.69 | 7.80E-04 | 0.0068 |
| ENST000003506380 | 1.69 | 7.36E-03 | 0.0234 |
| POLR2K           | 1.69 | 2.47E-04 | 0.0042 |
| GPNMB            | 1.69 | 6.04E-03 | 0.0208 |
| IDI1             | 1.69 | 5.53E-04 | 0.0058 |
| LRP12            | 1.69 | 4.99E-03 | 0.0184 |
| C1orf198         | 1.69 | 1.89E-02 | 0.0443 |
| ENST000000800591 | 1.69 | 1.30E-02 | 0.0341 |
| AL512633.1       | 1.69 | 1.25E-02 | 0.0332 |
| UBBP4            | 1.69 | 9.40E-03 | 0.0274 |
| MRPS15           | 1.69 | 1.99E-04 | 0.0040 |

|                  |      |          |        |
|------------------|------|----------|--------|
| SDAD1P1          | 1.69 | 1.81E-02 | 0.0430 |
| ANO7             | 1.69 | 8.14E-03 | 0.0251 |
| PSMD13           | 1.69 | 1.81E-04 | 0.0039 |
| LRRN4CL          | 1.69 | 1.15E-02 | 0.0314 |
| PC               | 1.69 | 9.87E-03 | 0.0283 |
| RFWD3            | 1.69 | 2.75E-04 | 0.0044 |
| EIF2S1           | 1.68 | 2.74E-04 | 0.0044 |
| COMTD1           | 1.68 | 1.10E-03 | 0.0080 |
| ENST000002760960 | 1.68 | 2.38E-03 | 0.0121 |
| ENST000003262662 | 1.68 | 3.35E-04 | 0.0047 |
| DLK2             | 1.68 | 1.18E-02 | 0.0320 |
| EIF2B3           | 1.68 | 3.88E-04 | 0.0050 |
| ENST000003571660 | 1.68 | 9.57E-03 | 0.0277 |
| MLST8            | 1.68 | 4.27E-04 | 0.0052 |
| MDH2             | 1.67 | 2.56E-03 | 0.0126 |
| POP7             | 1.67 | 7.15E-04 | 0.0065 |
| RPGRI1L          | 1.67 | 6.08E-04 | 0.0061 |
| SRSF1            | 1.67 | 2.57E-04 | 0.0043 |
| FBXO45           | 1.67 | 3.59E-04 | 0.0049 |
| MRPS2            | 1.67 | 3.94E-04 | 0.0050 |
| LSM11            | 1.67 | 3.90E-04 | 0.0050 |
| ENST00000508524  | 1.67 | 1.60E-03 | 0.0098 |
| MRPL21           | 1.67 | 3.75E-03 | 0.0156 |
| PFAS             | 1.67 | 8.60E-04 | 0.0072 |
| HK1              | 1.67 | 2.90E-04 | 0.0045 |
| PPFIA3           | 1.67 | 1.67E-02 | 0.0405 |
| SLC3A2           | 1.67 | 1.30E-03 | 0.0087 |
| MRPL33           | 1.67 | 5.14E-04 | 0.0057 |
| CSPG5            | 1.67 | 3.00E-03 | 0.0137 |
| ACTB             | 1.67 | 2.15E-04 | 0.0041 |
| PRPF4            | 1.67 | 4.71E-04 | 0.0054 |
| PFDN2            | 1.67 | 3.94E-04 | 0.0050 |
| SLC25A32         | 1.67 | 3.11E-04 | 0.0046 |
| ENST000003567081 | 1.67 | 1.59E-04 | 0.0037 |
| SDHB             | 1.67 | 2.45E-04 | 0.0042 |
| YEATS4           | 1.66 | 3.92E-03 | 0.0160 |
| PTPN14           | 1.66 | 3.72E-04 | 0.0049 |
| CSE1L            | 1.66 | 4.11E-04 | 0.0051 |
| EIF1AX           | 1.66 | 1.06E-02 | 0.0298 |
| EMC6             | 1.66 | 4.11E-03 | 0.0164 |
| SESTD1           | 1.66 | 1.89E-02 | 0.0442 |
| ENST000003334834 | 1.66 | 1.01E-02 | 0.0287 |
| PPIH             | 1.66 | 9.89E-04 | 0.0077 |
| NOP56            | 1.66 | 5.02E-04 | 0.0056 |
| PSTPIP2          | 1.66 | 2.61E-04 | 0.0044 |
| GLDR             | 1.65 | 6.95E-03 | 0.0227 |
| JPT2             | 1.65 | 9.01E-04 | 0.0074 |
| RBBP7            | 1.65 | 1.66E-04 | 0.0038 |
| EMC9             | 1.65 | 9.47E-04 | 0.0076 |
| EXOSC8           | 1.65 | 1.84E-04 | 0.0039 |

|                  |      |          |        |
|------------------|------|----------|--------|
| ENST000002562160 | 1.65 | 9.58E-04 | 0.0076 |
| PEMT             | 1.65 | 8.20E-04 | 0.0070 |
| ADPRHL2          | 1.65 | 7.76E-04 | 0.0068 |
| BCKDHA           | 1.65 | 7.72E-04 | 0.0068 |
| ENST000002155871 | 1.65 | 7.00E-04 | 0.0065 |
| BICDL2           | 1.65 | 3.51E-03 | 0.0149 |
| MIR621           | 1.65 | 2.38E-03 | 0.0121 |
| ENST000003048003 | 1.65 | 1.25E-02 | 0.0332 |
| STARD7           | 1.65 | 1.70E-04 | 0.0038 |
| METAP2           | 1.65 | 2.62E-04 | 0.0044 |
| MT-ND6           | 1.65 | 9.72E-04 | 0.0076 |
| KIAA1324         | 1.64 | 2.11E-02 | 0.0480 |
| NUTF2            | 1.64 | 4.05E-04 | 0.0051 |
| MT2A             | 1.64 | 2.37E-03 | 0.0121 |
| NFKB2            | 1.64 | 3.81E-03 | 0.0157 |
| AC007384.1       | 1.64 | 3.68E-03 | 0.0154 |
| ENST000003519860 | 1.64 | 2.06E-04 | 0.0040 |
| NIPAL1           | 1.64 | 2.21E-03 | 0.0116 |
| AC144652.1       | 1.64 | 9.20E-03 | 0.0270 |
| BOLA2-SMG1P6     | 1.64 | 2.19E-02 | 0.0493 |
| ATP5PF           | 1.64 | 2.46E-04 | 0.0042 |
| PMF1             | 1.64 | 2.85E-03 | 0.0134 |
| TRIAP1           | 1.64 | 1.65E-03 | 0.0099 |
| AP001347.1       | 1.64 | 1.46E-03 | 0.0093 |
| ATP5F1B          | 1.64 | 3.02E-04 | 0.0046 |
| EID1             | 1.64 | 3.80E-04 | 0.0050 |
| RPIA             | 1.63 | 5.16E-03 | 0.0188 |
| ENST000002611911 | 1.63 | 4.56E-04 | 0.0054 |
| BUD31            | 1.63 | 3.15E-04 | 0.0046 |
| ENST000002854070 | 1.63 | 7.66E-03 | 0.0241 |
| AP000769.1       | 1.63 | 2.13E-03 | 0.0114 |
| ANKRD34A         | 1.63 | 2.44E-03 | 0.0123 |
| NUP93            | 1.63 | 5.09E-04 | 0.0056 |
| C1orf174         | 1.63 | 5.35E-04 | 0.0058 |
| ENST000002820580 | 1.63 | 2.22E-04 | 0.0041 |
| FAM153B          | 1.63 | 3.04E-03 | 0.0138 |
| C5orf34          | 1.63 | 5.08E-04 | 0.0056 |
| CDC42BPB         | 1.63 | 3.92E-03 | 0.0160 |
| E2F5             | 1.63 | 1.44E-02 | 0.0366 |
| CBX3             | 1.63 | 1.96E-04 | 0.0040 |
| ELOVL6           | 1.63 | 3.74E-03 | 0.0155 |
| DDR1             | 1.63 | 2.76E-03 | 0.0131 |
| ENST000003090611 | 1.63 | 7.79E-03 | 0.0243 |
| NUP35            | 1.63 | 3.34E-04 | 0.0047 |
| IDH2             | 1.63 | 2.23E-03 | 0.0117 |
| IFT81            | 1.63 | 7.44E-04 | 0.0067 |
| STARD4           | 1.63 | 1.53E-02 | 0.0381 |
| CDK7             | 1.63 | 4.73E-04 | 0.0055 |
| DHODH            | 1.63 | 1.04E-03 | 0.0078 |
| CIAO2A           | 1.62 | 1.80E-04 | 0.0039 |

|                  |      |          |        |
|------------------|------|----------|--------|
| CUL7             | 1.62 | 3.59E-04 | 0.0049 |
| AC093616.1       | 1.62 | 2.06E-02 | 0.0471 |
| BNIP1            | 1.62 | 4.86E-04 | 0.0055 |
| RRP9             | 1.62 | 2.91E-03 | 0.0135 |
| CCNB1IP1         | 1.62 | 5.23E-04 | 0.0057 |
| SZRD1            | 1.62 | 6.05E-04 | 0.0061 |
| NAP1L5           | 1.62 | 2.33E-03 | 0.0120 |
| VDAC2            | 1.62 | 2.19E-04 | 0.0041 |
| TXNL4A           | 1.62 | 5.77E-04 | 0.0060 |
| JPT1             | 1.62 | 3.21E-04 | 0.0047 |
| TRMT5            | 1.62 | 6.05E-04 | 0.0061 |
| SNORA80D         | 1.62 | 1.52E-02 | 0.0379 |
| TMEM107          | 1.62 | 1.25E-03 | 0.0085 |
| ACVR1B           | 1.62 | 2.74E-03 | 0.0131 |
| CHRA1            | 1.62 | 7.73E-04 | 0.0068 |
| LNP1             | 1.62 | 6.89E-03 | 0.0226 |
| C5orf15          | 1.62 | 3.71E-04 | 0.0049 |
| ENST000003588670 | 1.62 | 2.34E-03 | 0.0120 |
| ADGRG1           | 1.62 | 4.36E-03 | 0.0170 |
| GSTP1            | 1.62 | 1.30E-03 | 0.0087 |
| AC009275.1       | 1.62 | 1.44E-02 | 0.0365 |
| DOHH             | 1.61 | 1.06E-03 | 0.0079 |
| CD3EAP           | 1.61 | 1.28E-02 | 0.0337 |
| RTCB             | 1.61 | 2.15E-04 | 0.0041 |
| WDR90            | 1.61 | 6.77E-04 | 0.0064 |
| C12orf60         | 1.61 | 4.00E-03 | 0.0161 |
| TRIB3            | 1.61 | 3.09E-03 | 0.0140 |
| TMED1            | 1.61 | 1.13E-03 | 0.0081 |
| ACSL1            | 1.61 | 1.21E-03 | 0.0084 |
| NEIL3            | 1.61 | 7.69E-04 | 0.0068 |
| ENST000003121890 | 1.61 | 5.93E-03 | 0.0205 |
| EIF3B            | 1.61 | 3.25E-04 | 0.0047 |
| ENST000002561902 | 1.61 | 3.47E-04 | 0.0048 |
| PM20D2           | 1.61 | 7.88E-04 | 0.0069 |
| GOLGA2P7         | 1.61 | 4.84E-03 | 0.0181 |
| SUPT16H          | 1.61 | 2.84E-04 | 0.0045 |
| FARSA            | 1.61 | 1.07E-03 | 0.0080 |
| ENST000002616000 | 1.61 | 8.62E-04 | 0.0072 |
| ENST000003048743 | 1.61 | 1.62E-03 | 0.0098 |
| ZMYND19          | 1.61 | 3.03E-04 | 0.0046 |
| AJUBA            | 1.61 | 1.42E-03 | 0.0091 |
| NUDC             | 1.61 | 1.17E-03 | 0.0083 |
| KIAA1958         | 1.60 | 2.08E-02 | 0.0475 |
| RILPL2           | 1.60 | 5.14E-04 | 0.0057 |
| UBA1             | 1.60 | 5.96E-04 | 0.0060 |
| TMEM201          | 1.60 | 2.08E-03 | 0.0112 |
| PFDN6            | 1.60 | 2.44E-04 | 0.0042 |
| UQCRFS1          | 1.60 | 2.09E-04 | 0.0040 |
| ENST000002620330 | 1.60 | 6.98E-04 | 0.0065 |
| CD22             | 1.60 | 8.63E-03 | 0.0259 |

|                  |      |          |        |
|------------------|------|----------|--------|
| MCTS1            | 1.60 | 2.32E-04 | 0.0042 |
| TOPBP1           | 1.60 | 2.14E-04 | 0.0041 |
| PUM3             | 1.60 | 8.67E-04 | 0.0072 |
| ENST000003512880 | 1.60 | 7.93E-04 | 0.0069 |
| SCLY             | 1.60 | 7.05E-04 | 0.0065 |
| ENST000002289551 | 1.60 | 1.77E-03 | 0.0102 |
| GEMIN5           | 1.60 | 3.46E-04 | 0.0048 |
| NOP10            | 1.60 | 3.16E-04 | 0.0046 |
| FAM229B          | 1.60 | 8.15E-04 | 0.0070 |
| NR6A1            | 1.60 | 2.39E-03 | 0.0122 |
| ATF4             | 1.60 | 1.60E-03 | 0.0098 |
| TIMM17B          | 1.59 | 2.77E-03 | 0.0132 |
| PXMP2            | 1.59 | 7.99E-03 | 0.0247 |
| RPS10-NUDT3      | 1.59 | 4.16E-04 | 0.0051 |
| ENST000002705171 | 1.59 | 3.77E-03 | 0.0156 |
| AC026464.6       | 1.59 | 2.90E-03 | 0.0135 |
| IPO5             | 1.59 | 3.94E-04 | 0.0050 |
| LMCD1            | 1.59 | 1.54E-03 | 0.0095 |
| EIF6             | 1.59 | 2.13E-03 | 0.0114 |
| UQCC2            | 1.59 | 8.51E-04 | 0.0071 |
| MRPL16           | 1.59 | 2.35E-04 | 0.0042 |
| TTC27            | 1.59 | 7.47E-04 | 0.0067 |
| PKIG             | 1.59 | 1.12E-02 | 0.0308 |
| DYNC2LI1         | 1.59 | 1.48E-02 | 0.0372 |
| EPS8L2           | 1.59 | 2.51E-03 | 0.0124 |
| WDR12            | 1.59 | 7.83E-04 | 0.0069 |
| FARSB            | 1.59 | 2.70E-04 | 0.0044 |
| FARP2            | 1.58 | 8.53E-04 | 0.0072 |
| HDAC7            | 1.58 | 2.58E-03 | 0.0127 |
| ENST000003010711 | 1.58 | 3.35E-04 | 0.0047 |
| AC002407.1       | 1.58 | 2.06E-02 | 0.0472 |
| TMEM126A         | 1.58 | 8.99E-04 | 0.0074 |
| AC099522.2       | 1.58 | 1.04E-02 | 0.0293 |
| RNLS             | 1.58 | 1.61E-02 | 0.0395 |
| CEP72            | 1.58 | 1.88E-03 | 0.0106 |
| FIRRE            | 1.58 | 1.87E-03 | 0.0105 |
| MRPS28           | 1.58 | 5.76E-04 | 0.0060 |
| ENST000003347051 | 1.58 | 2.93E-03 | 0.0135 |
| SRRD             | 1.58 | 1.36E-03 | 0.0089 |
| DNAJC9           | 1.58 | 3.42E-04 | 0.0048 |
| ITGB1BP2         | 1.58 | 2.73E-03 | 0.0131 |
| HTRA2            | 1.58 | 6.87E-04 | 0.0064 |
| CBX1             | 1.58 | 5.10E-04 | 0.0056 |
| ENST000002517220 | 1.58 | 5.05E-03 | 0.0186 |
| YWHAE            | 1.58 | 1.55E-03 | 0.0096 |
| PGM1             | 1.58 | 5.17E-04 | 0.0057 |
| GTF3C5           | 1.58 | 3.56E-04 | 0.0048 |
| ANAPC1           | 1.58 | 5.70E-04 | 0.0059 |
| GRSF1            | 1.58 | 2.91E-04 | 0.0045 |
| CCND2            | 1.58 | 1.53E-03 | 0.0095 |

|                  |      |          |        |
|------------------|------|----------|--------|
| C7orf50          | 1.58 | 1.60E-02 | 0.0393 |
| PHF5A            | 1.57 | 1.87E-03 | 0.0106 |
| GART             | 1.57 | 2.53E-04 | 0.0043 |
| AC097534.2       | 1.57 | 4.87E-03 | 0.0182 |
| ECHS1            | 1.57 | 2.93E-04 | 0.0045 |
| PGRMC1           | 1.57 | 5.20E-04 | 0.0057 |
| PPP1R16B         | 1.57 | 2.34E-04 | 0.0042 |
| MRPL14           | 1.57 | 1.78E-03 | 0.0103 |
| TMEM99           | 1.57 | 5.52E-03 | 0.0196 |
| POLR2E           | 1.57 | 1.84E-03 | 0.0105 |
| MAPKAPK3         | 1.57 | 2.90E-03 | 0.0135 |
| TMA16            | 1.57 | 7.62E-04 | 0.0068 |
| ENST000002730640 | 1.57 | 6.17E-03 | 0.0210 |
| ZCCHC24          | 1.57 | 1.19E-02 | 0.0321 |
| TRIT1            | 1.57 | 9.37E-04 | 0.0075 |
| GRWD1            | 1.57 | 5.80E-04 | 0.0060 |
| SAMD4A           | 1.57 | 1.19E-03 | 0.0083 |
| PDHA1            | 1.57 | 2.19E-04 | 0.0041 |
| STAT5A           | 1.57 | 2.28E-04 | 0.0042 |
| PXN-AS1          | 1.57 | 1.19E-03 | 0.0083 |
| SPIN4            | 1.57 | 1.43E-03 | 0.0092 |
| AP1S3            | 1.57 | 4.82E-03 | 0.0181 |
| PCCB             | 1.57 | 4.48E-04 | 0.0053 |
| AC004847.1       | 1.57 | 1.04E-02 | 0.0293 |
| STAMBP           | 1.56 | 2.43E-04 | 0.0042 |
| SP140            | 1.56 | 6.37E-03 | 0.0215 |
| RBBP9            | 1.56 | 2.93E-04 | 0.0045 |
| ENST000003375140 | 1.56 | 2.35E-03 | 0.0121 |
| HSPA4            | 1.56 | 3.10E-04 | 0.0046 |
| CNOT9            | 1.56 | 3.66E-04 | 0.0049 |
| MFAP1            | 1.56 | 2.59E-04 | 0.0044 |
| EIF4A3           | 1.56 | 5.27E-04 | 0.0057 |
| SAE1             | 1.56 | 1.04E-03 | 0.0079 |
| ARID5A           | 1.56 | 1.69E-03 | 0.0100 |
| ZCRB1            | 1.56 | 2.16E-04 | 0.0041 |
| CD58             | 1.56 | 2.81E-03 | 0.0133 |
| ENST000003301371 | 1.56 | 5.31E-04 | 0.0058 |
| ENST000003154231 | 1.56 | 1.28E-03 | 0.0086 |
| ACTR1B           | 1.56 | 3.82E-04 | 0.0050 |
| GLB1L            | 1.56 | 7.32E-03 | 0.0234 |
| CCDC47           | 1.56 | 4.01E-04 | 0.0051 |
| RAD23A           | 1.56 | 1.89E-03 | 0.0106 |
| LACTB            | 1.56 | 8.99E-04 | 0.0074 |
| ENST000003220302 | 1.56 | 4.98E-04 | 0.0056 |
| FBLN7            | 1.56 | 5.72E-04 | 0.0059 |
| ENST000002204292 | 1.56 | 3.36E-03 | 0.0146 |
| ENST000003552380 | 1.56 | 2.76E-04 | 0.0044 |
| ENST000002646890 | 1.56 | 3.82E-04 | 0.0050 |
| SNHG17           | 1.56 | 4.05E-04 | 0.0051 |
| NAA20            | 1.56 | 5.52E-04 | 0.0058 |

|                  |      |          |        |
|------------------|------|----------|--------|
| ENST000002722981 | 1.56 | 3.98E-04 | 0.0051 |
| NXT1             | 1.55 | 4.51E-04 | 0.0054 |
| EEF1AKMT1        | 1.55 | 3.78E-03 | 0.0156 |
| NUCKS1           | 1.55 | 2.88E-04 | 0.0045 |
| SUPT4H1          | 1.55 | 2.96E-04 | 0.0046 |
| BCCIP            | 1.55 | 4.84E-04 | 0.0055 |
| VMP1             | 1.55 | 1.33E-03 | 0.0088 |
| CCNE1            | 1.55 | 1.76E-03 | 0.0102 |
| PI4K2B           | 1.55 | 2.46E-04 | 0.0042 |
| FAR2             | 1.55 | 2.16E-02 | 0.0487 |
| PLXNA1           | 1.55 | 1.77E-03 | 0.0102 |
| PGAM5            | 1.55 | 3.73E-04 | 0.0049 |
| MSH2             | 1.55 | 2.97E-04 | 0.0046 |
| PRKDC            | 1.55 | 2.77E-04 | 0.0044 |
| NDUFS6           | 1.55 | 4.76E-04 | 0.0055 |
| ENST000003067040 | 1.55 | 1.68E-03 | 0.0100 |
| AL035461.2       | 1.55 | 5.02E-03 | 0.0185 |
| MAPK6            | 1.55 | 3.66E-03 | 0.0153 |
| MRPL19           | 1.55 | 3.07E-04 | 0.0046 |
| SNAPC1           | 1.55 | 4.05E-04 | 0.0051 |
| PRELID3B         | 1.55 | 5.57E-04 | 0.0059 |
| NUDCD1           | 1.54 | 5.51E-04 | 0.0058 |
| RYBP             | 1.54 | 4.54E-04 | 0.0054 |
| PMPCA            | 1.54 | 5.77E-04 | 0.0060 |
| ASPHD2           | 1.54 | 3.92E-03 | 0.0160 |
| IFNLR1           | 1.54 | 3.16E-03 | 0.0141 |
| EBP              | 1.54 | 7.02E-04 | 0.0065 |
| ENST000002637950 | 1.54 | 6.02E-03 | 0.0207 |
| INAFM2           | 1.54 | 3.35E-03 | 0.0146 |
| SNRPA            | 1.54 | 3.17E-03 | 0.0141 |
| POLR1A           | 1.54 | 1.66E-03 | 0.0099 |
| AC127070.1       | 1.54 | 1.55E-02 | 0.0384 |
| MTX1             | 1.54 | 3.26E-04 | 0.0047 |
| ENST000003278000 | 1.54 | 9.66E-04 | 0.0076 |
| VRK1             | 1.54 | 2.39E-04 | 0.0042 |
| MRPS26           | 1.54 | 1.24E-02 | 0.0330 |
| MRPS18B          | 1.54 | 7.48E-04 | 0.0067 |
| ENST000002994383 | 1.54 | 4.38E-03 | 0.0171 |
| GHITM            | 1.54 | 4.96E-03 | 0.0184 |
| SLC7A1           | 1.54 | 8.16E-03 | 0.0251 |
| TMEM69           | 1.53 | 3.98E-04 | 0.0051 |
| ENST000003136082 | 1.53 | 3.41E-04 | 0.0048 |
| SNORA14B         | 1.53 | 5.51E-03 | 0.0196 |
| CDK4             | 1.53 | 9.25E-03 | 0.0271 |
| CBX6             | 1.53 | 2.50E-04 | 0.0043 |
| RAB8A            | 1.53 | 7.31E-04 | 0.0066 |
| TNC              | 1.53 | 1.34E-02 | 0.0348 |
| STRBP            | 1.53 | 6.24E-04 | 0.0062 |
| HIST2H2AC        | 1.53 | 3.59E-04 | 0.0049 |
| EFTUD2           | 1.53 | 9.74E-04 | 0.0076 |

|                  |      |          |        |
|------------------|------|----------|--------|
| ACP1             | 1.53 | 6.62E-04 | 0.0063 |
| ENST000002680350 | 1.53 | 5.55E-03 | 0.0197 |
| ENST000003448431 | 1.52 | 7.35E-04 | 0.0066 |
| PNPT1            | 1.52 | 6.70E-04 | 0.0064 |
| SMIM15           | 1.52 | 7.30E-04 | 0.0066 |
| MRPL15           | 1.52 | 4.41E-04 | 0.0053 |
| CPSF3            | 1.52 | 2.98E-04 | 0.0046 |
| TEC              | 1.52 | 9.15E-04 | 0.0074 |
| ENST00000621148  | 1.52 | 2.09E-02 | 0.0476 |
| ZNF653           | 1.52 | 1.94E-03 | 0.0107 |
| ENST000003245930 | 1.52 | 7.72E-03 | 0.0242 |
| DHRS3            | 1.52 | 1.00E-03 | 0.0077 |
| ENST000003042710 | 1.52 | 4.42E-03 | 0.0172 |
| UBE2L3           | 1.52 | 3.24E-04 | 0.0047 |
| WDR35            | 1.52 | 4.77E-03 | 0.0180 |
| ENST000003152862 | 1.52 | 4.35E-04 | 0.0053 |
| ATP13A3          | 1.52 | 6.91E-04 | 0.0064 |
| PLEKHG4          | 1.51 | 5.72E-04 | 0.0059 |
| SARNP            | 1.51 | 2.92E-04 | 0.0045 |
| SLBP             | 1.51 | 2.68E-04 | 0.0044 |
| RDX              | 1.51 | 1.77E-03 | 0.0102 |
| ENST000003017641 | 1.51 | 4.69E-04 | 0.0054 |
| MRM1             | 1.51 | 4.16E-03 | 0.0165 |
| XPNPEP1          | 1.51 | 4.18E-04 | 0.0052 |
| ENST000002644511 | 1.51 | 6.93E-03 | 0.0227 |
| SMYD5            | 1.51 | 1.61E-03 | 0.0098 |
| APRT             | 1.51 | 3.22E-04 | 0.0047 |
| PKP4             | 1.51 | 4.94E-04 | 0.0056 |
| NDUFB3           | 1.51 | 2.75E-04 | 0.0044 |
| DAZAP1           | 1.51 | 6.56E-04 | 0.0063 |
| GPD2             | 1.51 | 9.58E-04 | 0.0076 |
| ILVBL            | 1.51 | 6.01E-04 | 0.0060 |
| EIF5B            | 1.51 | 3.63E-04 | 0.0049 |
| SF3B5            | 1.51 | 2.77E-04 | 0.0044 |
| COL27A1          | 1.51 | 1.10E-03 | 0.0080 |
| MRPS12           | 1.51 | 1.31E-03 | 0.0087 |
| ZBTB17           | 1.51 | 3.26E-04 | 0.0047 |
| SURF4            | 1.51 | 7.72E-04 | 0.0068 |
| PDIA6            | 1.51 | 5.60E-04 | 0.0059 |
| SNHG25           | 1.50 | 2.92E-03 | 0.0135 |
| SRPK1            | 1.50 | 2.46E-04 | 0.0042 |
| SARS2            | 1.50 | 1.75E-03 | 0.0102 |
| SMC1A            | 1.50 | 1.51E-02 | 0.0377 |
| ERF              | 1.50 | 1.04E-02 | 0.0292 |
| SLC30A9          | 1.50 | 2.68E-03 | 0.0129 |
| ETFA             | 1.50 | 3.69E-04 | 0.0049 |
| PDCD5            | 1.50 | 3.34E-04 | 0.0047 |
| HAUS7            | 1.50 | 3.17E-03 | 0.0141 |
| AP002360.1       | 1.50 | 1.22E-03 | 0.0084 |
| ENST000003287031 | 1.50 | 2.99E-03 | 0.0137 |

|                  |      |          |        |
|------------------|------|----------|--------|
| SNX8             | 1.50 | 1.87E-03 | 0.0105 |
| KPTN             | 1.50 | 4.37E-03 | 0.0170 |
| RF00003.32       | 1.50 | 2.86E-03 | 0.0134 |
| RF00003.40       | 1.50 | 2.86E-03 | 0.0134 |
| MRPL45           | 1.50 | 2.25E-03 | 0.0117 |
| ENST000002912953 | 1.50 | 1.06E-03 | 0.0079 |
| SNHG10           | 1.50 | 7.08E-04 | 0.0065 |
| VASH1            | 1.50 | 3.40E-03 | 0.0147 |
| POP1             | 1.49 | 7.40E-04 | 0.0066 |
| ENST000003299660 | 1.49 | 2.64E-03 | 0.0128 |
| GLRX3            | 1.49 | 7.32E-04 | 0.0066 |
| COA6             | 1.49 | 5.87E-04 | 0.0060 |
| ANK1             | 1.49 | 6.71E-03 | 0.0222 |
| TFAM             | 1.49 | 5.40E-04 | 0.0058 |
| COX7A2           | 1.49 | 2.99E-04 | 0.0046 |
| ENST000002605851 | 1.49 | 4.64E-04 | 0.0054 |
| HAUS8            | 1.49 | 7.66E-04 | 0.0068 |
| PEX10            | 1.49 | 1.60E-03 | 0.0098 |
| ENST000002885320 | 1.49 | 3.89E-04 | 0.0050 |
| ENST000003086960 | 1.49 | 2.55E-03 | 0.0126 |
| ASNS             | 1.49 | 7.47E-04 | 0.0067 |
| SLC25A3          | 1.49 | 2.64E-04 | 0.0044 |
| HSD17B6          | 1.49 | 2.95E-03 | 0.0136 |
| LRRCC1           | 1.49 | 6.76E-04 | 0.0064 |
| MAMDC4           | 1.49 | 1.77E-02 | 0.0421 |
| HNRNPA1P48       | 1.49 | 4.67E-03 | 0.0178 |
| JUN              | 1.49 | 5.54E-03 | 0.0197 |
| ROBO3            | 1.49 | 7.80E-03 | 0.0243 |
| PTBP1            | 1.49 | 1.04E-03 | 0.0078 |
| PSMB8            | 1.48 | 2.80E-04 | 0.0045 |
| NEIL2            | 1.48 | 1.06E-03 | 0.0079 |
| NUDT21           | 1.48 | 3.39E-04 | 0.0048 |
| EIF2S2           | 1.48 | 7.45E-04 | 0.0067 |
| DLAT             | 1.48 | 3.26E-03 | 0.0143 |
| SLC25A1          | 1.48 | 1.07E-03 | 0.0080 |
| TDRKH            | 1.48 | 1.53E-03 | 0.0095 |
| NOC3L            | 1.48 | 1.01E-03 | 0.0078 |
| DPAGT1           | 1.48 | 1.73E-03 | 0.0102 |
| H2AFV            | 1.48 | 4.66E-04 | 0.0054 |
| STRAP            | 1.48 | 3.75E-04 | 0.0049 |
| AC145207.5       | 1.48 | 7.10E-04 | 0.0065 |
| NDUFB6           | 1.48 | 2.35E-03 | 0.0121 |
| ENST000002656632 | 1.48 | 1.31E-03 | 0.0087 |
| DHRS7B           | 1.48 | 1.05E-03 | 0.0079 |
| COX7B            | 1.48 | 4.79E-04 | 0.0055 |
| USP28            | 1.48 | 8.47E-04 | 0.0071 |
| ENST000001972682 | 1.48 | 3.32E-03 | 0.0145 |
| C8orf37          | 1.48 | 6.36E-03 | 0.0214 |
| DCLRE1A          | 1.48 | 3.97E-04 | 0.0051 |
| MAST2            | 1.48 | 1.22E-02 | 0.0326 |

|                  |      |          |        |
|------------------|------|----------|--------|
| ENST000003367330 | 1.48 | 1.76E-03 | 0.0102 |
| NAB1             | 1.48 | 2.92E-03 | 0.0135 |
| CETN3            | 1.47 | 2.80E-04 | 0.0045 |
| CPT2             | 1.47 | 6.30E-04 | 0.0062 |
| GPX1             | 1.47 | 2.01E-03 | 0.0110 |
| ABCB10           | 1.47 | 1.31E-03 | 0.0087 |
| PGM2             | 1.47 | 4.05E-04 | 0.0051 |
| ARMC9            | 1.47 | 7.20E-03 | 0.0231 |
| CCDC136          | 1.47 | 6.07E-03 | 0.0208 |
| MVD              | 1.47 | 7.68E-04 | 0.0068 |
| MTND2P28         | 1.47 | 8.43E-03 | 0.0256 |
| ANP32A           | 1.47 | 2.74E-04 | 0.0044 |
| ENST000003437880 | 1.47 | 2.77E-04 | 0.0044 |
| MYO1A            | 1.47 | 6.06E-03 | 0.0208 |
| EEF2KMT          | 1.47 | 1.17E-03 | 0.0083 |
| MRPS35           | 1.47 | 6.34E-04 | 0.0062 |
| ENST000003232050 | 1.47 | 1.77E-02 | 0.0422 |
| ALKBH2           | 1.47 | 9.73E-04 | 0.0076 |
| SRXN1            | 1.47 | 3.23E-03 | 0.0142 |
| RBFA             | 1.46 | 5.41E-04 | 0.0058 |
| NIPSNAP2         | 1.46 | 4.27E-04 | 0.0052 |
| CREB3            | 1.46 | 3.95E-04 | 0.0050 |
| TIMM44           | 1.46 | 3.26E-04 | 0.0047 |
| HEATR1           | 1.46 | 5.54E-04 | 0.0059 |
| SHPK             | 1.46 | 2.76E-03 | 0.0132 |
| DHX33            | 1.46 | 6.78E-04 | 0.0064 |
| HSPA4L           | 1.46 | 1.44E-03 | 0.0092 |
| CARM1            | 1.46 | 6.29E-04 | 0.0062 |
| HDLBP            | 1.46 | 4.03E-04 | 0.0051 |
| TMEM160          | 1.46 | 3.74E-03 | 0.0155 |
| ELK1             | 1.46 | 1.89E-03 | 0.0106 |
| MAP3K6           | 1.46 | 2.42E-03 | 0.0122 |
| PSMD12           | 1.46 | 7.58E-04 | 0.0067 |
| HIST1H2AC        | 1.46 | 1.01E-03 | 0.0077 |
| USP1             | 1.46 | 3.86E-04 | 0.0050 |
| EXOSC2           | 1.46 | 4.23E-04 | 0.0052 |
| IRAK1            | 1.45 | 3.55E-03 | 0.0150 |
| PSMD11           | 1.45 | 2.89E-04 | 0.0045 |
| ARPC5L           | 1.45 | 1.75E-03 | 0.0102 |
| C11orf95         | 1.45 | 1.32E-02 | 0.0345 |
| NFKBID           | 1.45 | 2.44E-03 | 0.0123 |
| COA4             | 1.45 | 5.79E-04 | 0.0060 |
| WDR45B           | 1.45 | 2.83E-04 | 0.0045 |
| CCDC71L          | 1.45 | 1.48E-03 | 0.0093 |
| ENST000003307522 | 1.45 | 8.41E-04 | 0.0071 |
| GCSH             | 1.45 | 3.74E-03 | 0.0155 |
| MINDY4           | 1.45 | 1.63E-02 | 0.0398 |
| SREBF1           | 1.45 | 1.21E-03 | 0.0084 |
| WDR43            | 1.45 | 7.09E-04 | 0.0065 |
| NOP58            | 1.45 | 7.37E-04 | 0.0066 |

|                  |      |          |        |
|------------------|------|----------|--------|
| TIMM8B           | 1.45 | 3.84E-04 | 0.0050 |
| MRPL22           | 1.45 | 3.47E-04 | 0.0048 |
| WBP4             | 1.45 | 5.07E-04 | 0.0056 |
| GLRX5            | 1.44 | 9.98E-04 | 0.0077 |
| DBF4             | 1.44 | 3.35E-04 | 0.0047 |
| GLS2             | 1.44 | 1.20E-02 | 0.0323 |
| ENST000002632700 | 1.44 | 7.16E-04 | 0.0065 |
| ENST000002799071 | 1.44 | 5.83E-04 | 0.0060 |
| ODF2             | 1.44 | 1.20E-03 | 0.0084 |
| TRIM69           | 1.44 | 6.80E-04 | 0.0064 |
| RPLP0            | 1.44 | 6.09E-04 | 0.0061 |
| ENST000003175020 | 1.44 | 2.44E-03 | 0.0123 |
| APOBEC3G         | 1.44 | 5.94E-03 | 0.0205 |
| HUWE1            | 1.44 | 4.05E-04 | 0.0051 |
| ICA1L            | 1.44 | 7.47E-04 | 0.0067 |
| AC132192.2       | 1.44 | 2.42E-03 | 0.0122 |
| CENPL            | 1.44 | 8.86E-04 | 0.0073 |
| AC011462.1       | 1.44 | 2.44E-03 | 0.0123 |
| ENST000003594290 | 1.44 | 4.02E-03 | 0.0162 |
| CEP152           | 1.44 | 6.31E-04 | 0.0062 |
| UBR7             | 1.44 | 3.13E-04 | 0.0046 |
| PSPH             | 1.44 | 1.65E-02 | 0.0401 |
| AC083899.1       | 1.43 | 1.16E-03 | 0.0082 |
| NOC2L            | 1.43 | 1.21E-03 | 0.0084 |
| GTF2H3           | 1.43 | 1.88E-03 | 0.0106 |
| AARSD1           | 1.43 | 2.88E-03 | 0.0134 |
| ENST000003112751 | 1.43 | 1.75E-02 | 0.0419 |
| NOL7             | 1.43 | 5.19E-04 | 0.0057 |
| GSTZ1            | 1.43 | 1.72E-03 | 0.0101 |
| MAP7             | 1.43 | 8.24E-03 | 0.0253 |
| WDR17            | 1.43 | 3.99E-03 | 0.0161 |
| XPO1             | 1.43 | 3.98E-04 | 0.0051 |
| NT5M             | 1.43 | 4.73E-03 | 0.0179 |
| ENST000003310790 | 1.43 | 8.49E-04 | 0.0071 |
| MRPL27           | 1.43 | 1.14E-03 | 0.0082 |
| SNORD104         | 1.43 | 1.29E-02 | 0.0339 |
| EIF3C            | 1.43 | 2.98E-04 | 0.0046 |
| CCDC138          | 1.43 | 4.44E-04 | 0.0053 |
| NDUFB8           | 1.43 | 2.99E-04 | 0.0046 |
| JOSD1            | 1.43 | 3.34E-04 | 0.0047 |
| KIF21A           | 1.43 | 1.02E-02 | 0.0290 |
| KARS             | 1.43 | 4.98E-04 | 0.0056 |
| SNORA79B         | 1.43 | 1.17E-02 | 0.0318 |
| SNX5             | 1.42 | 3.44E-04 | 0.0048 |
| DEK              | 1.42 | 3.27E-04 | 0.0047 |
| CTU2             | 1.42 | 5.56E-03 | 0.0197 |
| HPF1             | 1.42 | 2.29E-03 | 0.0119 |
| CD63             | 1.42 | 3.26E-03 | 0.0143 |
| SUCLA2           | 1.42 | 6.53E-04 | 0.0063 |
| BARD1            | 1.42 | 3.63E-04 | 0.0049 |

|                  |      |          |        |
|------------------|------|----------|--------|
| KPNB1            | 1.42 | 6.58E-04 | 0.0063 |
| FANK1            | 1.42 | 1.52E-02 | 0.0380 |
| LIN9             | 1.42 | 6.17E-04 | 0.0061 |
| AMD1             | 1.42 | 4.17E-04 | 0.0052 |
| RHOG             | 1.42 | 6.25E-03 | 0.0212 |
| RGCC             | 1.42 | 1.29E-03 | 0.0087 |
| SENP3            | 1.42 | 7.58E-04 | 0.0067 |
| PSMC4            | 1.42 | 3.14E-04 | 0.0046 |
| GEMIN6           | 1.42 | 9.69E-04 | 0.0076 |
| KIF22            | 1.42 | 3.47E-04 | 0.0048 |
| WDR5             | 1.42 | 5.18E-04 | 0.0057 |
| SNX22            | 1.42 | 2.82E-03 | 0.0133 |
| HDHD5            | 1.42 | 6.22E-04 | 0.0062 |
| PRPS1            | 1.41 | 4.89E-04 | 0.0055 |
| PLAUR            | 1.41 | 1.29E-03 | 0.0087 |
| ATP5F1A          | 1.41 | 4.05E-04 | 0.0051 |
| IPO7             | 1.41 | 6.52E-04 | 0.0063 |
| SNHG1            | 1.41 | 2.16E-03 | 0.0114 |
| GCNT1            | 1.41 | 1.00E-02 | 0.0286 |
| TMX1             | 1.41 | 6.26E-04 | 0.0062 |
| MDH1             | 1.41 | 3.47E-04 | 0.0048 |
| ENST000003449890 | 1.41 | 2.24E-03 | 0.0117 |
| MDFIC            | 1.41 | 1.61E-02 | 0.0395 |
| SOWAHC           | 1.41 | 1.16E-02 | 0.0316 |
| ENST000002615311 | 1.41 | 3.20E-04 | 0.0047 |
| ENST000003230642 | 1.41 | 5.53E-03 | 0.0196 |
| JUND             | 1.41 | 5.06E-03 | 0.0186 |
| ENST000003261971 | 1.41 | 2.06E-03 | 0.0111 |
| GTF2H2C_2        | 1.41 | 1.20E-03 | 0.0084 |
| SRP68            | 1.41 | 3.69E-04 | 0.0049 |
| ENST000002944011 | 1.41 | 7.60E-03 | 0.0239 |
| MISP3            | 1.41 | 1.96E-02 | 0.0455 |
| ENST000002388232 | 1.41 | 2.15E-03 | 0.0114 |
| COTL1            | 1.41 | 1.81E-03 | 0.0104 |
| ACOT4            | 1.41 | 4.28E-03 | 0.0168 |
| ENST000002526224 | 1.41 | 1.48E-03 | 0.0093 |
| MAPK13           | 1.41 | 9.54E-04 | 0.0076 |
| ATP5ME           | 1.41 | 1.37E-03 | 0.0089 |
| ENST000003389950 | 1.40 | 2.23E-03 | 0.0117 |
| SPX              | 1.40 | 9.04E-03 | 0.0267 |
| RBM17            | 1.40 | 5.71E-04 | 0.0059 |
| SNORA70          | 1.40 | 2.31E-03 | 0.0119 |
| CKAP2            | 1.40 | 1.43E-03 | 0.0091 |
| BLVRA            | 1.40 | 1.17E-02 | 0.0317 |
| TAF1A            | 1.40 | 8.59E-04 | 0.0072 |
| SPRYD7           | 1.40 | 8.30E-04 | 0.0071 |
| FAM136A          | 1.40 | 3.94E-04 | 0.0050 |
| PPM1G            | 1.40 | 6.69E-04 | 0.0064 |
| SNRPB2           | 1.40 | 4.08E-04 | 0.0051 |
| SNRNP40          | 1.40 | 4.87E-04 | 0.0055 |

|                  |      |          |        |
|------------------|------|----------|--------|
| COX6C            | 1.40 | 4.05E-04 | 0.0051 |
| TOE1             | 1.40 | 7.84E-04 | 0.0069 |
| C9orf43          | 1.40 | 9.45E-03 | 0.0275 |
| IPMK             | 1.40 | 4.92E-04 | 0.0056 |
| SUMO1            | 1.40 | 3.59E-04 | 0.0049 |
| TNPO3            | 1.40 | 3.31E-04 | 0.0047 |
| ASNA1            | 1.40 | 5.55E-04 | 0.0059 |
| AC027559.1       | 1.40 | 2.83E-03 | 0.0133 |
| MCM3             | 1.40 | 1.68E-03 | 0.0100 |
| ENST000002183282 | 1.39 | 3.47E-04 | 0.0048 |
| GPSM1            | 1.39 | 1.70E-03 | 0.0101 |
| ATP5MPL          | 1.39 | 6.16E-04 | 0.0061 |
| ENST000003737150 | 1.39 | 1.94E-03 | 0.0107 |
| ENST000003411540 | 1.39 | 8.72E-03 | 0.0262 |
| RPSA             | 1.39 | 5.49E-04 | 0.0058 |
| CEP57L1          | 1.39 | 2.30E-03 | 0.0119 |
| SDHAF3           | 1.39 | 2.41E-03 | 0.0122 |
| ENST000002256651 | 1.39 | 6.23E-04 | 0.0062 |
| PRELID1P1        | 1.39 | 1.62E-02 | 0.0396 |
| FIBP             | 1.39 | 5.99E-04 | 0.0060 |
| ENST000003328590 | 1.39 | 7.96E-04 | 0.0069 |
| RAB9B            | 1.39 | 2.14E-02 | 0.0484 |
| IDH3A            | 1.39 | 5.71E-04 | 0.0059 |
| ENST000002991734 | 1.39 | 1.31E-02 | 0.0342 |
| ENST000003008704 | 1.38 | 3.94E-04 | 0.0050 |
| CHCHD1           | 1.38 | 4.40E-04 | 0.0053 |
| SCRIB            | 1.38 | 9.55E-04 | 0.0076 |
| DMXL2            | 1.38 | 5.66E-03 | 0.0199 |
| BORA             | 1.38 | 6.23E-04 | 0.0062 |
| APTX             | 1.38 | 2.03E-03 | 0.0110 |
| XRCC5            | 1.38 | 3.95E-04 | 0.0050 |
| PGBD1            | 1.38 | 1.55E-02 | 0.0385 |
| C8orf33          | 1.38 | 8.51E-04 | 0.0071 |
| MRPL18           | 1.38 | 2.00E-03 | 0.0109 |
| AC064850.1       | 1.38 | 4.41E-03 | 0.0172 |
| TWISTNB          | 1.38 | 7.07E-04 | 0.0065 |
| RIDA             | 1.38 | 8.21E-04 | 0.0070 |
| ADO              | 1.38 | 4.05E-03 | 0.0162 |
| SEC61B           | 1.38 | 8.58E-04 | 0.0072 |
| ERI1             | 1.37 | 5.95E-04 | 0.0060 |
| P2RX5            | 1.37 | 4.85E-03 | 0.0181 |
| DRG1             | 1.37 | 6.61E-04 | 0.0063 |
| OLA1             | 1.37 | 6.84E-04 | 0.0064 |
| UBL4A            | 1.37 | 6.39E-04 | 0.0062 |
| GPN1             | 1.37 | 5.08E-04 | 0.0056 |
| ESD              | 1.37 | 4.06E-04 | 0.0051 |
| AFG3L2           | 1.37 | 5.50E-04 | 0.0058 |
| HAUS6            | 1.37 | 1.24E-03 | 0.0085 |
| ENST000002707762 | 1.37 | 3.23E-03 | 0.0142 |
| SF3B3            | 1.37 | 5.45E-04 | 0.0058 |

|                  |      |          |        |
|------------------|------|----------|--------|
| UBALD2           | 1.37 | 8.63E-03 | 0.0260 |
| ENST000002525123 | 1.37 | 1.46E-03 | 0.0093 |
| ACACA            | 1.37 | 5.16E-04 | 0.0057 |
| PDCD2L           | 1.37 | 1.33E-03 | 0.0088 |
| PPP4C            | 1.37 | 7.09E-03 | 0.0230 |
| ENST000003117131 | 1.37 | 3.85E-03 | 0.0158 |
| ENST000003589010 | 1.37 | 4.54E-04 | 0.0054 |
| MRPL40           | 1.37 | 2.28E-03 | 0.0119 |
| TOMM40L          | 1.37 | 1.03E-03 | 0.0078 |
| RBX1             | 1.37 | 4.81E-04 | 0.0055 |
| ENST000003299670 | 1.37 | 3.67E-03 | 0.0154 |
| PSME3            | 1.37 | 7.37E-04 | 0.0066 |
| TTC8             | 1.37 | 2.13E-03 | 0.0113 |
| KBTBD8           | 1.37 | 6.37E-04 | 0.0062 |
| ENST000003022431 | 1.37 | 5.18E-04 | 0.0057 |
| PUF60            | 1.37 | 6.53E-04 | 0.0063 |
| EIF2A            | 1.37 | 4.29E-04 | 0.0052 |
| CCNG2            | 1.36 | 3.16E-03 | 0.0141 |
| MRPS16           | 1.36 | 4.94E-04 | 0.0056 |
| RASGRP4          | 1.36 | 4.20E-03 | 0.0166 |
| PHPT1            | 1.36 | 1.61E-03 | 0.0098 |
| ENST000003261810 | 1.36 | 1.23E-03 | 0.0085 |
| PEX3             | 1.36 | 1.88E-03 | 0.0106 |
| GJC1             | 1.36 | 3.50E-03 | 0.0149 |
| PRPF31           | 1.36 | 1.23E-03 | 0.0085 |
| UMPS             | 1.36 | 1.81E-03 | 0.0104 |
| PSMG3            | 1.36 | 1.05E-03 | 0.0079 |
| ENST000002735412 | 1.36 | 6.67E-04 | 0.0064 |
| ENST000002425770 | 1.36 | 1.14E-03 | 0.0081 |
| IPO4             | 1.36 | 6.98E-04 | 0.0065 |
| ENST000003545030 | 1.36 | 1.62E-03 | 0.0098 |
| LINC02595        | 1.36 | 5.51E-03 | 0.0196 |
| NSDHL            | 1.36 | 1.20E-03 | 0.0084 |
| MBD3             | 1.36 | 1.52E-03 | 0.0095 |
| APOBEC3C         | 1.36 | 9.04E-03 | 0.0267 |
| GTF3C6           | 1.36 | 1.21E-03 | 0.0084 |
| ITPA             | 1.36 | 2.50E-03 | 0.0124 |
| ENST000003345981 | 1.36 | 1.68E-02 | 0.0407 |
| TSPAN3           | 1.36 | 5.45E-03 | 0.0195 |
| EMD              | 1.36 | 8.86E-04 | 0.0073 |
| ADK              | 1.36 | 5.12E-04 | 0.0056 |
| DOT1L            | 1.36 | 4.09E-03 | 0.0164 |
| PSMD7            | 1.36 | 4.89E-04 | 0.0055 |
| DDX39A           | 1.36 | 6.77E-04 | 0.0064 |
| NIFK             | 1.36 | 1.16E-03 | 0.0082 |
| ENST000003104411 | 1.35 | 2.51E-03 | 0.0125 |
| TRMT112          | 1.35 | 8.34E-04 | 0.0071 |
| ARMC1            | 1.35 | 5.11E-04 | 0.0056 |
| SNORD93          | 1.35 | 1.92E-02 | 0.0448 |
| EIPR1            | 1.35 | 8.84E-04 | 0.0073 |

|                  |      |          |        |
|------------------|------|----------|--------|
| CBWD1            | 1.35 | 2.18E-03 | 0.0115 |
| ENST00000625834  | 1.35 | 5.81E-04 | 0.0060 |
| ZFP91-CNTF       | 1.35 | 6.72E-03 | 0.0222 |
| YEATS2           | 1.35 | 4.66E-04 | 0.0054 |
| PSMD10           | 1.35 | 1.12E-03 | 0.0081 |
| IDH3B            | 1.35 | 8.08E-04 | 0.0070 |
| GNL2             | 1.35 | 1.25E-03 | 0.0086 |
| ABHD10           | 1.35 | 5.82E-04 | 0.0060 |
| TYMP             | 1.35 | 1.47E-02 | 0.0371 |
| MAGOH            | 1.35 | 7.18E-04 | 0.0065 |
| ABCB7            | 1.35 | 9.26E-04 | 0.0075 |
| CLPP             | 1.35 | 9.03E-04 | 0.0074 |
| ENST000003017881 | 1.35 | 9.41E-04 | 0.0075 |
| NCEH1            | 1.35 | 6.23E-03 | 0.0212 |
| RFC1             | 1.35 | 1.09E-03 | 0.0080 |
| RARS             | 1.35 | 9.59E-04 | 0.0076 |
| TDG              | 1.35 | 2.44E-03 | 0.0123 |
| ASRGL1           | 1.35 | 2.85E-03 | 0.0134 |
| MCUR1            | 1.34 | 8.08E-04 | 0.0070 |
| ENST000002805570 | 1.34 | 4.03E-04 | 0.0051 |
| USP37            | 1.34 | 4.21E-04 | 0.0052 |
| ENST000002529841 | 1.34 | 1.36E-02 | 0.0351 |
| ENST000003286490 | 1.34 | 1.52E-03 | 0.0095 |
| NUDCD2           | 1.34 | 4.82E-04 | 0.0055 |
| SRI              | 1.34 | 4.10E-04 | 0.0051 |
| MICAL3           | 1.34 | 3.94E-03 | 0.0160 |
| DDX47            | 1.34 | 4.51E-04 | 0.0054 |
| ENST000000130700 | 1.34 | 5.66E-04 | 0.0059 |
| SNHG12           | 1.34 | 1.44E-03 | 0.0092 |
| ENST000002648930 | 1.34 | 6.08E-04 | 0.0061 |
| DDX39B           | 1.34 | 6.00E-04 | 0.0060 |
| TCEA1            | 1.34 | 4.74E-04 | 0.0055 |
| MMS22L           | 1.34 | 4.71E-03 | 0.0178 |
| NAA15            | 1.34 | 6.07E-04 | 0.0061 |
| PARL             | 1.34 | 5.07E-04 | 0.0056 |
| KSR1             | 1.34 | 1.29E-03 | 0.0087 |
| MBOAT7           | 1.34 | 7.99E-03 | 0.0247 |
| AIFM1            | 1.34 | 5.04E-04 | 0.0056 |
| WDR74            | 1.34 | 1.97E-03 | 0.0108 |
| ENST000003260050 | 1.34 | 1.21E-03 | 0.0084 |
| QPCTL            | 1.34 | 3.04E-03 | 0.0138 |
| PSMG1            | 1.33 | 6.60E-04 | 0.0063 |
| PABPN1           | 1.33 | 4.54E-04 | 0.0054 |
| RCL1             | 1.33 | 6.65E-04 | 0.0063 |
| AKR1A1           | 1.33 | 2.86E-03 | 0.0134 |
| NDUFA2           | 1.33 | 9.92E-04 | 0.0077 |
| PMVK             | 1.33 | 1.28E-03 | 0.0086 |
| AURKAIP1         | 1.33 | 7.29E-04 | 0.0066 |
| THNSL1           | 1.33 | 1.49E-03 | 0.0094 |
| SEC13            | 1.33 | 2.07E-03 | 0.0112 |

|                  |      |          |        |
|------------------|------|----------|--------|
| UBL7-AS1         | 1.33 | 1.11E-03 | 0.0081 |
| PSMC2            | 1.33 | 6.35E-04 | 0.0062 |
| NDUFS5           | 1.33 | 4.94E-04 | 0.0056 |
| EZR              | 1.33 | 9.00E-04 | 0.0074 |
| AP003084.1       | 1.33 | 1.22E-03 | 0.0084 |
| CISD1            | 1.33 | 6.37E-04 | 0.0062 |
| NOL10            | 1.33 | 1.25E-03 | 0.0085 |
| C6orf52          | 1.33 | 5.46E-03 | 0.0195 |
| NUDT4P2          | 1.33 | 1.58E-03 | 0.0097 |
| SLC25A13         | 1.33 | 4.54E-03 | 0.0175 |
| POLR2F           | 1.32 | 7.31E-04 | 0.0066 |
| BLVRB            | 1.32 | 9.61E-04 | 0.0076 |
| DENND1A          | 1.32 | 7.88E-04 | 0.0069 |
| MRPL58           | 1.32 | 6.31E-04 | 0.0062 |
| ENST000003393740 | 1.32 | 3.01E-03 | 0.0137 |
| SRRT             | 1.32 | 1.51E-03 | 0.0094 |
| DBF4B            | 1.32 | 5.60E-03 | 0.0198 |
| WDR36            | 1.32 | 1.21E-03 | 0.0084 |
| SLC46A1          | 1.32 | 7.09E-03 | 0.0230 |
| MTRF1L           | 1.32 | 9.56E-04 | 0.0076 |
| IFITM3           | 1.32 | 1.46E-02 | 0.0370 |
| ARID3A           | 1.32 | 1.96E-03 | 0.0108 |
| AL591845.1       | 1.32 | 7.73E-03 | 0.0242 |
| ATP5IF1          | 1.32 | 7.97E-04 | 0.0069 |
| ALAS1            | 1.32 | 6.71E-04 | 0.0064 |
| CHID1            | 1.32 | 1.27E-02 | 0.0334 |
| ENST000002459320 | 1.32 | 1.02E-03 | 0.0078 |
| AC073896.1       | 1.32 | 2.90E-03 | 0.0135 |
| MRPL10           | 1.32 | 1.04E-03 | 0.0078 |
| DDX50            | 1.32 | 5.10E-04 | 0.0056 |
| TMEM109          | 1.32 | 1.79E-03 | 0.0103 |
| ACLY             | 1.32 | 9.01E-04 | 0.0074 |
| CRLS1            | 1.32 | 6.30E-04 | 0.0062 |
| TSFM             | 1.32 | 2.53E-03 | 0.0125 |
| SLA              | 1.31 | 3.74E-03 | 0.0155 |
| ENST000003129702 | 1.31 | 2.06E-02 | 0.0472 |
| ACSL4            | 1.31 | 2.71E-03 | 0.0130 |
| GAS8             | 1.31 | 2.95E-03 | 0.0136 |
| RNASEH1-AS1      | 1.31 | 4.35E-03 | 0.0170 |
| ENST000003189743 | 1.31 | 3.19E-03 | 0.0141 |
| AL022067.1       | 1.31 | 1.93E-02 | 0.0450 |
| NDUFAF2          | 1.31 | 9.94E-04 | 0.0077 |
| MTLN             | 1.31 | 3.45E-03 | 0.0148 |
| GNA11            | 1.31 | 3.41E-03 | 0.0147 |
| TCEAL3           | 1.31 | 3.18E-03 | 0.0141 |
| SNRPD2           | 1.31 | 1.64E-03 | 0.0099 |
| AC099548.2       | 1.31 | 5.30E-04 | 0.0058 |
| HNRNPL           | 1.31 | 4.97E-04 | 0.0056 |
| TBRG4            | 1.31 | 1.09E-03 | 0.0080 |
| RNF121           | 1.31 | 1.27E-03 | 0.0086 |

|                  |      |          |        |
|------------------|------|----------|--------|
| RPP30            | 1.31 | 2.65E-03 | 0.0128 |
| LAS1L            | 1.31 | 2.11E-03 | 0.0113 |
| DPY19L2P2        | 1.31 | 4.62E-03 | 0.0177 |
| ENST000003213311 | 1.31 | 6.01E-04 | 0.0060 |
| SEM1             | 1.31 | 6.25E-04 | 0.0062 |
| LSM6             | 1.31 | 6.90E-04 | 0.0064 |
| IZUMO4           | 1.31 | 3.77E-03 | 0.0156 |
| BEND3            | 1.31 | 3.20E-03 | 0.0142 |
| CLDN12           | 1.31 | 8.95E-04 | 0.0073 |
| ERO1A            | 1.30 | 5.35E-04 | 0.0058 |
| BMS1             | 1.30 | 7.13E-04 | 0.0065 |
| ENST000002646700 | 1.30 | 1.02E-03 | 0.0078 |
| FBXL6            | 1.30 | 8.25E-03 | 0.0253 |
| LACTB2           | 1.30 | 7.57E-04 | 0.0067 |
| WDR83            | 1.30 | 5.08E-03 | 0.0186 |
| RAD23B           | 1.30 | 2.36E-03 | 0.0121 |
| STK32C           | 1.30 | 6.43E-03 | 0.0216 |
| MCMBP            | 1.30 | 6.70E-04 | 0.0064 |
| ZMIZ1            | 1.30 | 5.79E-03 | 0.0202 |
| NFKBIE           | 1.30 | 8.71E-04 | 0.0072 |
| PTRH2            | 1.30 | 1.14E-03 | 0.0082 |
| CD99             | 1.30 | 4.61E-04 | 0.0054 |
| APP              | 1.30 | 2.55E-03 | 0.0126 |
| HS6ST1           | 1.30 | 4.01E-03 | 0.0162 |
| PPCDC            | 1.30 | 8.29E-03 | 0.0253 |
| GUK1             | 1.30 | 4.76E-04 | 0.0055 |
| MREG             | 1.30 | 1.26E-03 | 0.0086 |
| ZNF282           | 1.30 | 4.16E-03 | 0.0165 |
| HIST1H2AK        | 1.30 | 7.73E-03 | 0.0242 |
| GTF2A2           | 1.30 | 2.02E-03 | 0.0110 |
| ENST000003025505 | 1.30 | 5.03E-04 | 0.0056 |
| RNF187           | 1.30 | 2.08E-03 | 0.0112 |
| ENST000002603241 | 1.30 | 1.61E-02 | 0.0395 |
| AIG1             | 1.29 | 1.37E-03 | 0.0089 |
| MTHFD1           | 1.29 | 1.05E-03 | 0.0079 |
| RAB27A           | 1.29 | 3.90E-03 | 0.0159 |
| CMAHP            | 1.29 | 6.37E-03 | 0.0214 |
| CISD3            | 1.29 | 3.13E-03 | 0.0140 |
| FECH             | 1.29 | 1.23E-03 | 0.0085 |
| AC006449.6       | 1.29 | 6.18E-03 | 0.0210 |
| AC006449.9       | 1.29 | 6.18E-03 | 0.0210 |
| ENST000003591910 | 1.29 | 7.04E-03 | 0.0229 |
| FHOD1            | 1.29 | 4.71E-03 | 0.0178 |
| PARP1            | 1.29 | 4.89E-04 | 0.0055 |
| ENST000002623061 | 1.29 | 3.72E-03 | 0.0155 |
| TBL3             | 1.29 | 2.79E-03 | 0.0133 |
| CNTROB           | 1.29 | 1.50E-03 | 0.0094 |
| HSPA14           | 1.29 | 1.27E-03 | 0.0086 |
| CCDC24           | 1.29 | 8.97E-03 | 0.0266 |
| AIFM2            | 1.29 | 1.86E-02 | 0.0439 |

|                  |      |          |        |
|------------------|------|----------|--------|
| ENST000002814560 | 1.29 | 5.40E-03 | 0.0194 |
| MRPL44           | 1.29 | 4.89E-04 | 0.0055 |
| AC004477.1       | 1.29 | 4.66E-03 | 0.0177 |
| SNHG19           | 1.29 | 2.19E-02 | 0.0492 |
| UBFD1            | 1.29 | 8.03E-04 | 0.0070 |
| SMG5             | 1.29 | 2.14E-03 | 0.0114 |
| JAKMIP1          | 1.29 | 3.73E-03 | 0.0155 |
| HMG1             | 1.29 | 4.91E-04 | 0.0056 |
| DPM1             | 1.29 | 1.95E-03 | 0.0108 |
| ENST000002623190 | 1.29 | 1.76E-02 | 0.0421 |
| AL138781.1       | 1.29 | 8.65E-03 | 0.0260 |
| NARS2            | 1.29 | 9.75E-03 | 0.0281 |
| MRPL54           | 1.29 | 8.62E-04 | 0.0072 |
| C16orf91         | 1.29 | 2.89E-03 | 0.0134 |
| PSMA5            | 1.29 | 5.72E-04 | 0.0059 |
| ENST000003160773 | 1.28 | 1.23E-02 | 0.0329 |
| DNAJC25          | 1.28 | 2.93E-03 | 0.0135 |
| ENST000003164230 | 1.28 | 7.21E-03 | 0.0231 |
| GNPAT            | 1.28 | 6.77E-04 | 0.0064 |
| NAP1L4P1         | 1.28 | 4.12E-03 | 0.0164 |
| ENST000003162923 | 1.28 | 4.14E-03 | 0.0165 |
| UHRF1BP1L        | 1.28 | 1.78E-03 | 0.0103 |
| AC002116.2       | 1.28 | 6.46E-03 | 0.0217 |
| DLG3             | 1.28 | 1.51E-03 | 0.0094 |
| H3F3B            | 1.28 | 8.59E-03 | 0.0259 |
| PSMD2            | 1.28 | 7.87E-04 | 0.0069 |
| SERPIN8          | 1.28 | 1.26E-03 | 0.0086 |
| PPP1R3B          | 1.28 | 8.96E-03 | 0.0266 |
| FANCM            | 1.28 | 5.46E-04 | 0.0058 |
| BICDL1           | 1.28 | 1.12E-02 | 0.0309 |
| KHK              | 1.28 | 3.17E-03 | 0.0141 |
| UBA2             | 1.28 | 5.53E-04 | 0.0058 |
| CSNK2A1          | 1.28 | 4.72E-04 | 0.0055 |
| CCR4             | 1.28 | 8.49E-03 | 0.0257 |
| CNP              | 1.28 | 1.50E-03 | 0.0094 |
| IMMT             | 1.28 | 6.71E-04 | 0.0064 |
| WDR3             | 1.28 | 1.97E-03 | 0.0108 |
| CNTLN            | 1.28 | 7.07E-03 | 0.0229 |
| PFN2             | 1.28 | 1.77E-02 | 0.0422 |
| ABCF1            | 1.28 | 1.33E-03 | 0.0088 |
| MRPS22           | 1.27 | 7.39E-04 | 0.0066 |
| KNOP1            | 1.27 | 2.13E-03 | 0.0113 |
| WDR46            | 1.27 | 9.88E-04 | 0.0077 |
| LAMTOR5          | 1.27 | 5.48E-04 | 0.0058 |
| AC135977.1       | 1.27 | 1.52E-02 | 0.0379 |
| SLC25A33         | 1.27 | 1.68E-03 | 0.0100 |
| ARMCX3           | 1.27 | 1.74E-03 | 0.0102 |
| SRP72            | 1.27 | 7.82E-04 | 0.0069 |
| RPSAP58          | 1.27 | 1.95E-02 | 0.0453 |
| TNFRSF14-AS1     | 1.27 | 3.35E-03 | 0.0145 |

|                  |      |          |        |
|------------------|------|----------|--------|
| HDDC3            | 1.27 | 1.64E-03 | 0.0099 |
| FUNDC2           | 1.27 | 1.21E-03 | 0.0084 |
| EIF4G3           | 1.27 | 1.31E-03 | 0.0087 |
| RPL29            | 1.27 | 2.52E-03 | 0.0125 |
| HSPA8            | 1.27 | 5.52E-04 | 0.0058 |
| ARPC2            | 1.27 | 9.88E-04 | 0.0077 |
| PCTP             | 1.27 | 8.92E-03 | 0.0265 |
| TIMM10B          | 1.27 | 2.05E-02 | 0.0469 |
| LYST             | 1.27 | 3.83E-03 | 0.0158 |
| ITGA1            | 1.27 | 1.40E-03 | 0.0091 |
| ENST000002649320 | 1.26 | 2.97E-03 | 0.0136 |
| DDX18            | 1.26 | 8.33E-04 | 0.0071 |
| FAM161A          | 1.26 | 6.17E-03 | 0.0210 |
| VAR52            | 1.26 | 3.41E-03 | 0.0147 |
| PRELP            | 1.26 | 3.61E-03 | 0.0152 |
| SMN2             | 1.26 | 1.15E-03 | 0.0082 |
| TXNL1            | 1.26 | 2.20E-03 | 0.0116 |
| LRP11            | 1.26 | 2.61E-03 | 0.0127 |
| NUDT2            | 1.26 | 4.68E-03 | 0.0178 |
| PNO1             | 1.26 | 1.17E-03 | 0.0083 |
| CEP83            | 1.26 | 1.72E-03 | 0.0101 |
| COMMD3-BMI1      | 1.26 | 1.21E-03 | 0.0084 |
| SUZ12            | 1.26 | 5.10E-04 | 0.0056 |
| PPP1R7           | 1.26 | 5.45E-04 | 0.0058 |
| DAD1             | 1.26 | 7.93E-04 | 0.0069 |
| RNF207           | 1.26 | 4.43E-03 | 0.0172 |
| RPL6             | 1.26 | 2.47E-03 | 0.0124 |
| P2RY11           | 1.26 | 5.81E-03 | 0.0203 |
| FDXR             | 1.26 | 5.82E-03 | 0.0203 |
| CY5D1            | 1.26 | 4.52E-03 | 0.0174 |
| EPRS             | 1.26 | 7.15E-04 | 0.0065 |
| ENST000002298660 | 1.26 | 2.69E-03 | 0.0130 |
| TARS             | 1.26 | 3.82E-03 | 0.0157 |
| AC141586.1       | 1.26 | 2.00E-02 | 0.0461 |
| PRDX2            | 1.26 | 8.64E-04 | 0.0072 |
| DIMT1            | 1.26 | 3.14E-03 | 0.0140 |
| CD151            | 1.26 | 8.07E-03 | 0.0249 |
| ZNF620           | 1.26 | 1.77E-02 | 0.0423 |
| DPH2             | 1.25 | 4.31E-03 | 0.0169 |
| TTC4             | 1.25 | 1.75E-03 | 0.0102 |
| SNHG8            | 1.25 | 5.93E-04 | 0.0060 |
| ENST000002364121 | 1.25 | 3.49E-03 | 0.0149 |
| PHF19            | 1.25 | 1.50E-02 | 0.0376 |
| TTC38            | 1.25 | 8.48E-03 | 0.0257 |
| MAIP1            | 1.25 | 1.01E-03 | 0.0078 |
| CETN2            | 1.25 | 3.93E-03 | 0.0160 |
| RAB11FIP1        | 1.25 | 1.50E-02 | 0.0376 |
| HNRNPA1          | 1.25 | 1.09E-03 | 0.0080 |
| CGAS             | 1.25 | 1.07E-03 | 0.0079 |
| LAMTOR2          | 1.25 | 8.17E-04 | 0.0070 |

|                  |      |          |        |
|------------------|------|----------|--------|
| MYO19            | 1.25 | 1.78E-03 | 0.0103 |
| FHL2             | 1.25 | 1.45E-02 | 0.0367 |
| NDUFB4           | 1.25 | 6.07E-04 | 0.0061 |
| MMAB             | 1.25 | 2.08E-03 | 0.0112 |
| ENST000002701420 | 1.25 | 1.84E-03 | 0.0105 |
| ISOC1            | 1.25 | 1.34E-03 | 0.0088 |
| PSMA7            | 1.25 | 1.77E-03 | 0.0102 |
| NAT10            | 1.25 | 1.22E-03 | 0.0084 |
| SUMO2            | 1.25 | 6.14E-04 | 0.0061 |
| DHX15            | 1.25 | 5.63E-04 | 0.0059 |
| TIMMDC1          | 1.25 | 1.26E-03 | 0.0086 |
| MXI1             | 1.24 | 2.84E-03 | 0.0134 |
| EXOC3-AS1        | 1.24 | 1.06E-02 | 0.0296 |
| MBD2             | 1.24 | 1.15E-03 | 0.0082 |
| ENST000003600010 | 1.24 | 2.60E-03 | 0.0127 |
| NAE1             | 1.24 | 1.70E-03 | 0.0101 |
| ZNF726           | 1.24 | 1.19E-03 | 0.0083 |
| ATG101           | 1.24 | 6.71E-04 | 0.0064 |
| AC024940.5       | 1.24 | 9.60E-03 | 0.0278 |
| PRELID3A         | 1.24 | 1.03E-02 | 0.0291 |
| CFAP20           | 1.24 | 6.16E-04 | 0.0061 |
| RPS19BP1         | 1.24 | 2.16E-03 | 0.0114 |
| P4HB             | 1.24 | 1.84E-03 | 0.0105 |
| DNAJA3           | 1.24 | 1.44E-03 | 0.0092 |
| PLGRKT           | 1.24 | 1.04E-02 | 0.0294 |
| UQCR10           | 1.24 | 6.99E-04 | 0.0065 |
| FAM27E3          | 1.24 | 7.66E-03 | 0.0241 |
| HNRNPF           | 1.24 | 8.55E-04 | 0.0072 |
| HIST1H4E         | 1.24 | 1.58E-03 | 0.0097 |
| POLE             | 1.24 | 5.68E-04 | 0.0059 |
| PPP2R3B          | 1.24 | 3.49E-03 | 0.0149 |
| LARS2            | 1.24 | 1.74E-03 | 0.0102 |
| WDR75            | 1.23 | 1.51E-03 | 0.0094 |
| GTF2F2           | 1.23 | 8.71E-04 | 0.0072 |
| CCDC113          | 1.23 | 5.08E-03 | 0.0187 |
| RABL3            | 1.23 | 7.40E-04 | 0.0066 |
| TMEM67           | 1.23 | 3.33E-03 | 0.0145 |
| C17orf51         | 1.23 | 1.22E-03 | 0.0084 |
| MBNL1-AS1        | 1.23 | 8.25E-03 | 0.0253 |
| ZNF850           | 1.23 | 2.06E-03 | 0.0111 |
| ENST000002653511 | 1.23 | 7.56E-04 | 0.0067 |
| QDPR             | 1.23 | 3.35E-03 | 0.0146 |
| URB2             | 1.23 | 2.49E-03 | 0.0124 |
| ENST000003141000 | 1.23 | 7.90E-03 | 0.0245 |
| RBM8A            | 1.23 | 2.35E-03 | 0.0121 |
| MRPS9            | 1.23 | 3.11E-03 | 0.0140 |
| ENST000002304310 | 1.23 | 2.96E-03 | 0.0136 |
| SEC14L2          | 1.23 | 1.02E-03 | 0.0078 |
| SMARCB1          | 1.23 | 3.39E-03 | 0.0147 |
| TAP1             | 1.23 | 1.63E-03 | 0.0099 |

|                  |      |          |        |
|------------------|------|----------|--------|
| ENST000002252981 | 1.23 | 1.33E-03 | 0.0088 |
| DNMT1            | 1.22 | 1.33E-03 | 0.0088 |
| TMEM147          | 1.22 | 1.74E-03 | 0.0102 |
| ENST000002311981 | 1.22 | 8.52E-04 | 0.0072 |
| CCDC124          | 1.22 | 7.44E-03 | 0.0236 |
| WRB              | 1.22 | 1.31E-03 | 0.0087 |
| ENST000002336300 | 1.22 | 1.21E-02 | 0.0324 |
| ADRM1            | 1.22 | 2.05E-03 | 0.0111 |
| DOCK7            | 1.22 | 1.88E-03 | 0.0106 |
| PUSL1            | 1.22 | 1.93E-02 | 0.0450 |
| C1orf35          | 1.22 | 1.50E-03 | 0.0094 |
| PSMB4            | 1.22 | 1.45E-03 | 0.0092 |
| EXTL2            | 1.22 | 8.89E-03 | 0.0265 |
| VDAC3            | 1.22 | 1.06E-03 | 0.0079 |
| ENST000003228970 | 1.22 | 4.93E-03 | 0.0183 |
| EVA1C            | 1.22 | 5.83E-03 | 0.0203 |
| FOXRED1          | 1.22 | 2.81E-03 | 0.0133 |
| KCTD17           | 1.22 | 5.90E-03 | 0.0204 |
| CALU             | 1.22 | 9.70E-04 | 0.0076 |
| HSBP1            | 1.22 | 9.74E-04 | 0.0076 |
| TMA7             | 1.22 | 1.73E-03 | 0.0101 |
| AGPAT5           | 1.22 | 4.96E-03 | 0.0184 |
| GALNT1           | 1.22 | 8.18E-04 | 0.0070 |
| ENST000003378590 | 1.22 | 7.06E-04 | 0.0065 |
| AC025423.2       | 1.22 | 7.75E-03 | 0.0242 |
| MALSU1           | 1.22 | 1.16E-03 | 0.0082 |
| FKBP1A           | 1.21 | 4.44E-03 | 0.0172 |
| IMP4             | 1.21 | 1.03E-03 | 0.0078 |
| CKLF             | 1.21 | 1.25E-03 | 0.0086 |
| PLIN2            | 1.21 | 2.99E-03 | 0.0137 |
| ENST000002788860 | 1.21 | 1.79E-02 | 0.0427 |
| ENST000002623750 | 1.21 | 1.42E-03 | 0.0091 |
| RPS2P5           | 1.21 | 3.22E-03 | 0.0142 |
| NTMT1            | 1.21 | 1.54E-03 | 0.0095 |
| CDC34            | 1.21 | 2.10E-03 | 0.0113 |
| BMI1             | 1.21 | 2.91E-03 | 0.0135 |
| NXT2             | 1.21 | 6.11E-03 | 0.0209 |
| PFKL             | 1.21 | 1.49E-03 | 0.0094 |
| PLIN3            | 1.21 | 2.03E-03 | 0.0110 |
| NDUFA4           | 1.21 | 7.18E-04 | 0.0065 |
| TMEM263          | 1.21 | 1.58E-03 | 0.0097 |
| IARS2            | 1.21 | 6.61E-04 | 0.0063 |
| MRPL9            | 1.21 | 1.26E-03 | 0.0086 |
| ISOC2            | 1.21 | 2.95E-03 | 0.0136 |
| GLTP             | 1.21 | 8.62E-04 | 0.0072 |
| TXN2             | 1.20 | 1.86E-03 | 0.0105 |
| NAA50            | 1.20 | 1.49E-03 | 0.0094 |
| AAMP             | 1.20 | 1.29E-03 | 0.0087 |
| UTP6             | 1.20 | 6.28E-04 | 0.0062 |
| NIP7             | 1.20 | 1.27E-03 | 0.0086 |

|                  |      |          |        |
|------------------|------|----------|--------|
| ZNF219           | 1.20 | 1.30E-02 | 0.0340 |
| KYAT3            | 1.20 | 8.84E-04 | 0.0073 |
| RPP25L           | 1.20 | 4.26E-03 | 0.0168 |
| SAPCD1           | 1.20 | 8.61E-03 | 0.0259 |
| NENF             | 1.20 | 3.83E-03 | 0.0158 |
| UGDH             | 1.20 | 3.97E-03 | 0.0161 |
| PDP2             | 1.20 | 7.56E-04 | 0.0067 |
| METTL5           | 1.20 | 1.23E-03 | 0.0085 |
| COX16            | 1.20 | 1.03E-03 | 0.0078 |
| ENST000003060520 | 1.20 | 7.54E-03 | 0.0238 |
| BCL6             | 1.20 | 1.18E-02 | 0.0319 |
| CCSAP            | 1.20 | 5.57E-03 | 0.0197 |
| ENST000003405780 | 1.20 | 1.80E-02 | 0.0427 |
| ACADM            | 1.20 | 9.43E-04 | 0.0075 |
| CCDC15           | 1.20 | 1.24E-02 | 0.0331 |
| ENST000003343790 | 1.20 | 8.33E-04 | 0.0071 |
| DCTD             | 1.20 | 1.40E-03 | 0.0091 |
| MRPS27           | 1.20 | 9.54E-04 | 0.0076 |
| AL512791.2       | 1.20 | 2.61E-03 | 0.0127 |
| TAF13            | 1.20 | 1.31E-03 | 0.0087 |
| MMADHC           | 1.20 | 7.37E-04 | 0.0066 |
| TIAM1            | 1.19 | 1.94E-03 | 0.0107 |
| ARF6             | 1.19 | 1.10E-03 | 0.0080 |
| AC072061.1       | 1.19 | 5.68E-03 | 0.0200 |
| HSD17B8          | 1.19 | 1.26E-02 | 0.0334 |
| IPPK             | 1.19 | 9.55E-04 | 0.0076 |
| POLR3K           | 1.19 | 4.15E-03 | 0.0165 |
| TELO2            | 1.19 | 5.37E-03 | 0.0193 |
| CWC27            | 1.19 | 2.15E-03 | 0.0114 |
| CES3             | 1.19 | 4.19E-03 | 0.0166 |
| ZC3HC1           | 1.19 | 5.39E-03 | 0.0193 |
| ENST000002403330 | 1.19 | 1.39E-02 | 0.0357 |
| NSMCE1           | 1.19 | 1.58E-03 | 0.0097 |
| ENST000002664810 | 1.19 | 5.06E-03 | 0.0186 |
| NDUFAF1          | 1.19 | 8.16E-04 | 0.0070 |
| ENST000003131460 | 1.19 | 8.95E-03 | 0.0266 |
| DNPEP            | 1.19 | 4.15E-03 | 0.0165 |
| DDX41            | 1.19 | 9.02E-04 | 0.0074 |
| RNF181           | 1.19 | 1.37E-02 | 0.0353 |
| RPS17            | 1.19 | 7.36E-04 | 0.0066 |
| ENST000003605791 | 1.19 | 1.26E-03 | 0.0086 |
| ACYP1            | 1.19 | 3.28E-03 | 0.0144 |
| NUDT5            | 1.19 | 1.27E-03 | 0.0086 |
| INPP1            | 1.19 | 1.42E-03 | 0.0091 |
| COPS3            | 1.19 | 8.74E-04 | 0.0072 |
| BMP1             | 1.19 | 1.27E-02 | 0.0336 |
| ENST000002803302 | 1.19 | 3.14E-03 | 0.0140 |
| HAUS2            | 1.19 | 7.28E-04 | 0.0066 |
| DDX49            | 1.19 | 1.07E-03 | 0.0079 |
| RNF26            | 1.19 | 2.75E-03 | 0.0131 |

|                  |      |          |        |
|------------------|------|----------|--------|
| NCOA7            | 1.19 | 3.12E-03 | 0.0140 |
| SF3A3            | 1.19 | 1.13E-03 | 0.0081 |
| MT-ATP8          | 1.19 | 5.37E-03 | 0.0193 |
| ICMT             | 1.19 | 1.19E-03 | 0.0083 |
| ENST000003315521 | 1.18 | 1.70E-02 | 0.0410 |
| KRR1             | 1.18 | 9.41E-04 | 0.0075 |
| CCND3            | 1.18 | 1.68E-03 | 0.0100 |
| ENST000001682160 | 1.18 | 3.47E-03 | 0.0149 |
| KIF5C            | 1.18 | 3.26E-03 | 0.0143 |
| GNB1             | 1.18 | 6.52E-04 | 0.0063 |
| TXLNA            | 1.18 | 1.30E-03 | 0.0087 |
| ETV6             | 1.18 | 1.03E-03 | 0.0078 |
| NDUFA8           | 1.18 | 2.15E-03 | 0.0114 |
| MRPL49           | 1.18 | 4.04E-03 | 0.0162 |
| AC103706.1       | 1.18 | 1.46E-02 | 0.0368 |
| ATAT1            | 1.18 | 7.69E-03 | 0.0241 |
| GABPB1           | 1.18 | 1.19E-03 | 0.0083 |
| TCOF1            | 1.18 | 2.42E-03 | 0.0123 |
| AKR1B1           | 1.18 | 1.55E-03 | 0.0096 |
| DDX54            | 1.18 | 1.13E-03 | 0.0081 |
| ENST000003302440 | 1.18 | 7.97E-04 | 0.0069 |
| NUP160           | 1.18 | 1.74E-03 | 0.0102 |
| BTF3L4P2         | 1.18 | 1.13E-02 | 0.0310 |
| ZNF146           | 1.18 | 1.08E-03 | 0.0080 |
| SFT2D1           | 1.18 | 1.08E-03 | 0.0080 |
| GOLGA2P10        | 1.18 | 2.13E-02 | 0.0483 |
| EXD2             | 1.18 | 1.83E-03 | 0.0104 |
| TCAF2            | 1.18 | 8.41E-04 | 0.0071 |
| BABAM1           | 1.18 | 1.22E-03 | 0.0084 |
| MTERF3           | 1.18 | 9.52E-04 | 0.0076 |
| DDX1             | 1.17 | 7.60E-04 | 0.0067 |
| ATP5PO           | 1.17 | 8.54E-04 | 0.0072 |
| POLR1C           | 1.17 | 2.30E-03 | 0.0119 |
| POMT2            | 1.17 | 3.20E-03 | 0.0142 |
| FSD1             | 1.17 | 1.05E-02 | 0.0294 |
| LRRC40           | 1.17 | 2.34E-03 | 0.0120 |
| POLR2J           | 1.17 | 2.54E-03 | 0.0125 |
| TBL2             | 1.17 | 1.19E-03 | 0.0083 |
| VASP             | 1.17 | 5.07E-03 | 0.0186 |
| ENST000002658661 | 1.17 | 1.44E-02 | 0.0366 |
| MRPL24           | 1.17 | 4.82E-03 | 0.0181 |
| FTSJ1            | 1.17 | 1.16E-03 | 0.0082 |
| NOP14            | 1.17 | 1.60E-02 | 0.0394 |
| SNAPC4           | 1.17 | 7.15E-03 | 0.0231 |
| SLC25A22         | 1.17 | 1.92E-02 | 0.0448 |
| ARMCX2           | 1.17 | 3.59E-03 | 0.0151 |
| NELFE            | 1.17 | 1.38E-03 | 0.0090 |
| RNASEH1          | 1.17 | 5.23E-03 | 0.0190 |
| TRMT10A          | 1.17 | 7.45E-03 | 0.0236 |
| RADX             | 1.17 | 1.45E-03 | 0.0092 |

|                  |      |          |        |
|------------------|------|----------|--------|
| NDUFS3           | 1.17 | 1.42E-03 | 0.0091 |
| PSMC1P1          | 1.17 | 2.67E-03 | 0.0129 |
| UCHL5            | 1.17 | 1.20E-03 | 0.0084 |
| ENST000002950872 | 1.17 | 1.92E-03 | 0.0107 |
| CDK16            | 1.17 | 2.26E-03 | 0.0118 |
| DESI1            | 1.16 | 1.22E-03 | 0.0084 |
| TIMM9            | 1.16 | 2.69E-03 | 0.0130 |
| ENST000002903490 | 1.16 | 1.44E-03 | 0.0092 |
| TRAF2            | 1.16 | 8.65E-04 | 0.0072 |
| SRSF9            | 1.16 | 1.13E-03 | 0.0081 |
| LARP7            | 1.16 | 1.52E-03 | 0.0095 |
| PDK3             | 1.16 | 1.74E-03 | 0.0102 |
| ENST000002605990 | 1.16 | 4.36E-03 | 0.0170 |
| RNPS1            | 1.16 | 1.16E-03 | 0.0082 |
| FAM86C2P         | 1.16 | 2.12E-02 | 0.0481 |
| EMG1             | 1.16 | 2.54E-03 | 0.0125 |
| BUD13            | 1.16 | 9.34E-04 | 0.0075 |
| POLR2I           | 1.16 | 4.57E-03 | 0.0175 |
| MAP3K13          | 1.16 | 2.53E-03 | 0.0125 |
| RABGGTB          | 1.16 | 5.43E-03 | 0.0194 |
| NCDN             | 1.16 | 6.33E-03 | 0.0214 |
| C19orf53         | 1.16 | 1.67E-03 | 0.0100 |
| ENST000003077410 | 1.16 | 1.75E-02 | 0.0418 |
| TACO1            | 1.16 | 1.73E-03 | 0.0101 |
| POU2AF1          | 1.16 | 3.86E-03 | 0.0158 |
| C16orf87         | 1.16 | 1.12E-03 | 0.0081 |
| RAB34            | 1.16 | 9.04E-03 | 0.0267 |
| OXR1             | 1.15 | 7.83E-04 | 0.0069 |
| AL132780.3       | 1.15 | 5.10E-03 | 0.0187 |
| RPL23AP53        | 1.15 | 1.40E-02 | 0.0358 |
| UBE2N            | 1.15 | 1.25E-03 | 0.0086 |
| TTI2             | 1.15 | 2.01E-03 | 0.0110 |
| SOCS7            | 1.15 | 1.04E-03 | 0.0078 |
| ENST000003078922 | 1.15 | 1.07E-02 | 0.0299 |
| RELB             | 1.15 | 1.72E-03 | 0.0101 |
| PIGU             | 1.15 | 1.37E-03 | 0.0089 |
| GFI1             | 1.15 | 8.64E-03 | 0.0260 |
| DCAF13           | 1.15 | 1.11E-03 | 0.0081 |
| SLC25A44         | 1.15 | 5.62E-03 | 0.0198 |
| E2F6             | 1.15 | 2.15E-03 | 0.0114 |
| MRPS24           | 1.15 | 9.97E-04 | 0.0077 |
| EBPL             | 1.15 | 1.53E-02 | 0.0380 |
| CCDC25           | 1.15 | 8.42E-04 | 0.0071 |
| CCDC88A          | 1.15 | 5.03E-03 | 0.0185 |
| CYREN            | 1.15 | 1.95E-03 | 0.0108 |
| SERPINH1         | 1.15 | 5.79E-03 | 0.0202 |
| BLOC1S2          | 1.15 | 1.71E-03 | 0.0101 |
| API5             | 1.15 | 9.97E-04 | 0.0077 |
| MYCBP            | 1.15 | 2.95E-03 | 0.0136 |
| ENST000003213371 | 1.15 | 6.85E-03 | 0.0225 |

|                  |      |          |        |
|------------------|------|----------|--------|
| PSMD4            | 1.15 | 9.27E-04 | 0.0075 |
| MDC1             | 1.15 | 5.68E-03 | 0.0200 |
| SP2-AS1          | 1.15 | 1.31E-02 | 0.0342 |
| RNPEP            | 1.15 | 6.58E-03 | 0.0220 |
| NFS1             | 1.15 | 1.30E-03 | 0.0087 |
| NEDD1            | 1.15 | 1.02E-03 | 0.0078 |
| VGLL4            | 1.15 | 3.98E-03 | 0.0161 |
| NFYB             | 1.15 | 2.15E-03 | 0.0114 |
| PNPO             | 1.15 | 1.95E-03 | 0.0107 |
| HCAR1            | 1.15 | 6.76E-03 | 0.0223 |
| HBS1L            | 1.15 | 1.04E-03 | 0.0079 |
| DHX37            | 1.15 | 1.35E-03 | 0.0089 |
| MFN2             | 1.15 | 1.17E-03 | 0.0083 |
| AZIN1            | 1.14 | 8.82E-04 | 0.0073 |
| TMEM70           | 1.14 | 3.87E-03 | 0.0159 |
| HMGCL            | 1.14 | 4.62E-03 | 0.0176 |
| AHCYL1           | 1.14 | 1.24E-03 | 0.0085 |
| PRIM2            | 1.14 | 3.00E-03 | 0.0137 |
| PSMB9            | 1.14 | 1.60E-03 | 0.0098 |
| DNAJA2           | 1.14 | 1.09E-03 | 0.0080 |
| MRGBP            | 1.14 | 9.17E-04 | 0.0074 |
| PAM16            | 1.14 | 2.91E-03 | 0.0135 |
| NUP88            | 1.14 | 9.56E-04 | 0.0076 |
| ENST000003594660 | 1.14 | 1.02E-02 | 0.0290 |
| CHMP5            | 1.14 | 1.20E-03 | 0.0084 |
| UTP15            | 1.14 | 3.29E-03 | 0.0144 |
| ELP5             | 1.14 | 1.91E-03 | 0.0106 |
| UNG              | 1.14 | 1.56E-03 | 0.0096 |
| MSANTD3          | 1.14 | 2.08E-02 | 0.0474 |
| UEVLD            | 1.14 | 4.66E-03 | 0.0177 |
| RPS6KB2          | 1.14 | 8.67E-04 | 0.0072 |
| PCMT1            | 1.14 | 1.09E-03 | 0.0080 |
| ZNF827           | 1.14 | 5.11E-03 | 0.0187 |
| VCP              | 1.14 | 1.12E-03 | 0.0081 |
| CCHCR1           | 1.14 | 2.44E-03 | 0.0123 |
| ZNF584           | 1.13 | 4.40E-03 | 0.0171 |
| C1orf43          | 1.13 | 7.90E-04 | 0.0069 |
| PHF13            | 1.13 | 2.71E-03 | 0.0130 |
| LINC00963        | 1.13 | 7.05E-03 | 0.0229 |
| SRSF3            | 1.13 | 9.58E-04 | 0.0076 |
| XXYL1            | 1.13 | 2.05E-02 | 0.0470 |
| EML2             | 1.13 | 8.10E-04 | 0.0070 |
| HAUS5            | 1.13 | 2.14E-03 | 0.0114 |
| KCTD5            | 1.13 | 4.64E-03 | 0.0177 |
| HNRNPLL          | 1.13 | 1.98E-03 | 0.0109 |
| LRTOMT           | 1.13 | 1.62E-02 | 0.0396 |
| RAD1             | 1.13 | 1.38E-03 | 0.0090 |
| CDC26            | 1.13 | 2.03E-03 | 0.0110 |
| NDUFS4           | 1.13 | 1.19E-03 | 0.0083 |
| NIF3L1           | 1.13 | 1.35E-03 | 0.0089 |

|                  |      |          |        |
|------------------|------|----------|--------|
| TWNK             | 1.13 | 4.31E-03 | 0.0169 |
| MCU              | 1.13 | 8.44E-03 | 0.0256 |
| RAB5IF           | 1.13 | 9.89E-04 | 0.0077 |
| ARMC6            | 1.13 | 5.79E-03 | 0.0202 |
| CCDC117          | 1.13 | 8.97E-04 | 0.0073 |
| PIM2             | 1.13 | 2.28E-03 | 0.0119 |
| ENST000002267250 | 1.13 | 9.29E-03 | 0.0272 |
| PER1             | 1.13 | 7.74E-03 | 0.0242 |
| CCNC             | 1.13 | 9.51E-04 | 0.0076 |
| SNORD3A          | 1.13 | 3.50E-03 | 0.0149 |
| NEDD8            | 1.13 | 1.90E-03 | 0.0106 |
| ZNF724           | 1.13 | 9.82E-04 | 0.0077 |
| ENY2             | 1.13 | 2.26E-03 | 0.0118 |
| HMGXB4           | 1.13 | 6.10E-03 | 0.0209 |
| ENST000002261050 | 1.13 | 5.30E-03 | 0.0191 |
| PRDX5            | 1.12 | 1.76E-03 | 0.0102 |
| CHD1L            | 1.12 | 1.30E-03 | 0.0087 |
| CEP295           | 1.12 | 4.55E-03 | 0.0175 |
| ARL1             | 1.12 | 1.27E-03 | 0.0086 |
| AC105137.2       | 1.12 | 8.41E-03 | 0.0256 |
| NFE2L1           | 1.12 | 2.48E-03 | 0.0124 |
| ENST000002777460 | 1.12 | 9.57E-03 | 0.0277 |
| CANX             | 1.12 | 3.29E-03 | 0.0144 |
| AMIGO2           | 1.12 | 8.44E-03 | 0.0256 |
| IER5             | 1.12 | 1.10E-03 | 0.0080 |
| GUCD1            | 1.12 | 9.29E-04 | 0.0075 |
| NDUFA1           | 1.12 | 1.02E-03 | 0.0078 |
| CHML             | 1.12 | 3.35E-03 | 0.0146 |
| CDC27            | 1.12 | 8.41E-04 | 0.0071 |
| LRRC58           | 1.12 | 1.08E-03 | 0.0080 |
| RFT1             | 1.12 | 5.14E-03 | 0.0188 |
| NDUFA9           | 1.12 | 2.03E-03 | 0.0110 |
| STX1A            | 1.12 | 5.09E-03 | 0.0187 |
| SPINT2           | 1.12 | 1.43E-02 | 0.0365 |
| HYAL3            | 1.12 | 1.26E-02 | 0.0333 |
| SNF8             | 1.12 | 2.79E-03 | 0.0132 |
| SYNCRIP          | 1.12 | 1.31E-03 | 0.0087 |
| CEP128           | 1.12 | 1.74E-03 | 0.0102 |
| PAWR             | 1.12 | 1.37E-03 | 0.0089 |
| HEXIM2           | 1.12 | 1.61E-02 | 0.0395 |
| ENST000003252120 | 1.12 | 1.74E-03 | 0.0102 |
| GPANK1           | 1.12 | 2.29E-03 | 0.0119 |
| IMPAD1           | 1.11 | 1.14E-03 | 0.0082 |
| ENST000003371471 | 1.11 | 6.63E-03 | 0.0221 |
| DSTN             | 1.11 | 1.18E-03 | 0.0083 |
| EIF3D            | 1.11 | 1.02E-03 | 0.0078 |
| RPL4             | 1.11 | 1.70E-03 | 0.0101 |
| ENST000003320350 | 1.11 | 9.66E-03 | 0.0279 |
| CHCHD3           | 1.11 | 1.34E-03 | 0.0088 |
| EIF4A1           | 1.11 | 1.39E-03 | 0.0090 |

|                  |      |          |        |
|------------------|------|----------|--------|
| ENST000003171680 | 1.11 | 2.92E-03 | 0.0135 |
| SREBF2           | 1.11 | 1.78E-03 | 0.0103 |
| TMSB10           | 1.11 | 9.35E-04 | 0.0075 |
| C12orf75         | 1.11 | 1.42E-03 | 0.0091 |
| HNRNPM           | 1.11 | 2.47E-03 | 0.0124 |
| NUDT4            | 1.11 | 1.63E-03 | 0.0099 |
| PRADC1           | 1.11 | 4.23E-03 | 0.0167 |
| WDR4             | 1.11 | 2.62E-03 | 0.0128 |
| TMEM64           | 1.11 | 1.73E-03 | 0.0102 |
| CAPZA1           | 1.11 | 1.04E-03 | 0.0078 |
| PROS1            | 1.11 | 6.25E-03 | 0.0212 |
| REEP4            | 1.11 | 9.47E-03 | 0.0275 |
| DERA             | 1.11 | 2.31E-03 | 0.0119 |
| HAUS4            | 1.11 | 1.74E-03 | 0.0102 |
| ZDHHC16          | 1.11 | 2.06E-03 | 0.0111 |
| TOP3A            | 1.11 | 2.10E-03 | 0.0112 |
| MYDGF            | 1.11 | 6.83E-03 | 0.0225 |
| NONO             | 1.11 | 1.37E-03 | 0.0089 |
| ATP5PB           | 1.11 | 1.08E-03 | 0.0080 |
| CDC23            | 1.11 | 1.12E-03 | 0.0081 |
| C12orf43         | 1.10 | 1.27E-03 | 0.0086 |
| ENST000003348161 | 1.10 | 1.45E-02 | 0.0367 |
| RBM38            | 1.10 | 2.69E-03 | 0.0130 |
| LARP4            | 1.10 | 2.95E-03 | 0.0136 |
| ENST000003613830 | 1.10 | 9.45E-04 | 0.0076 |
| ENST000003010720 | 1.10 | 2.57E-03 | 0.0126 |
| GFM2             | 1.10 | 9.89E-04 | 0.0077 |
| PPP2R3C          | 1.10 | 1.65E-03 | 0.0099 |
| IFT140           | 1.10 | 3.31E-03 | 0.0144 |
| PPIL3            | 1.10 | 1.67E-03 | 0.0100 |
| RAE1             | 1.10 | 9.51E-04 | 0.0076 |
| ZBTB21           | 1.10 | 3.34E-03 | 0.0145 |
| TDP1             | 1.10 | 1.28E-03 | 0.0086 |
| UTP14A           | 1.10 | 1.61E-03 | 0.0098 |
| CMAS             | 1.10 | 1.13E-03 | 0.0081 |
| TOMM20           | 1.10 | 1.77E-03 | 0.0102 |
| MAP2K1           | 1.10 | 3.54E-03 | 0.0150 |
| NAGA             | 1.10 | 2.91E-03 | 0.0135 |
| IRGQ             | 1.10 | 1.11E-03 | 0.0081 |
| CISD2            | 1.10 | 2.13E-03 | 0.0114 |
| GNL1             | 1.10 | 3.53E-03 | 0.0150 |
| ENST000002369800 | 1.10 | 7.98E-03 | 0.0247 |
| WDR41            | 1.10 | 1.85E-03 | 0.0105 |
| SEC23B           | 1.10 | 2.49E-03 | 0.0124 |
| OTUD6B           | 1.10 | 3.67E-03 | 0.0153 |
| ZNF511           | 1.10 | 2.18E-02 | 0.0491 |
| RPAP3            | 1.10 | 1.83E-03 | 0.0104 |
| EIF4E            | 1.10 | 1.62E-03 | 0.0098 |
| GDI2             | 1.10 | 8.06E-03 | 0.0249 |
| ENST000003225350 | 1.10 | 9.33E-04 | 0.0075 |

|                  |      |          |        |
|------------------|------|----------|--------|
| COLGALT1         | 1.10 | 1.39E-03 | 0.0090 |
| UQCRC2           | 1.10 | 1.10E-03 | 0.0080 |
| RIOK1            | 1.10 | 1.98E-03 | 0.0109 |
| HACD1            | 1.10 | 1.34E-02 | 0.0348 |
| RHOA             | 1.10 | 9.74E-04 | 0.0076 |
| ENST000003034360 | 1.09 | 5.22E-03 | 0.0190 |
| SYNGR2           | 1.09 | 2.91E-03 | 0.0135 |
| ANKLE2           | 1.09 | 9.48E-04 | 0.0076 |
| OPA1             | 1.09 | 1.76E-03 | 0.0102 |
| HMGCR            | 1.09 | 1.13E-03 | 0.0081 |
| ACAA2            | 1.09 | 1.07E-03 | 0.0080 |
| HSPA13           | 1.09 | 5.75E-03 | 0.0201 |
| CAMSAP1          | 1.09 | 1.06E-02 | 0.0297 |
| AL355388.2       | 1.09 | 6.26E-03 | 0.0212 |
| NDUFA13          | 1.09 | 1.88E-03 | 0.0106 |
| DCPS             | 1.09 | 1.59E-03 | 0.0097 |
| CUEDC2           | 1.09 | 1.61E-03 | 0.0098 |
| DLEU2            | 1.09 | 1.18E-03 | 0.0083 |
| LTV1             | 1.09 | 1.54E-03 | 0.0095 |
| CLTA             | 1.09 | 1.10E-03 | 0.0080 |
| FAM104B          | 1.09 | 2.54E-03 | 0.0125 |
| RAB33A           | 1.09 | 1.88E-03 | 0.0106 |
| CMTM6            | 1.09 | 1.13E-03 | 0.0081 |
| PIH1D1           | 1.09 | 1.76E-03 | 0.0102 |
| PSMC6            | 1.09 | 1.95E-03 | 0.0107 |
| FKBP3            | 1.08 | 1.05E-03 | 0.0079 |
| NDUFB7           | 1.08 | 1.85E-03 | 0.0105 |
| D2HGDH           | 1.08 | 5.60E-03 | 0.0198 |
| PTPA             | 1.08 | 9.13E-03 | 0.0269 |
| AC107871.1       | 1.08 | 1.64E-02 | 0.0401 |
| POLR1B           | 1.08 | 1.35E-03 | 0.0089 |
| SWI5             | 1.08 | 3.68E-03 | 0.0154 |
| CCDC167          | 1.08 | 4.89E-03 | 0.0182 |
| MTIF2            | 1.08 | 1.50E-03 | 0.0094 |
| SIGMAR1          | 1.08 | 1.43E-03 | 0.0091 |
| UBA5             | 1.08 | 6.57E-03 | 0.0219 |
| ENST000002159171 | 1.08 | 2.16E-03 | 0.0114 |
| CREG1            | 1.08 | 3.94E-03 | 0.0160 |
| RBM3             | 1.08 | 3.66E-03 | 0.0153 |
| RPL37A           | 1.08 | 1.87E-03 | 0.0105 |
| PER2             | 1.08 | 2.62E-03 | 0.0128 |
| ABCC4            | 1.08 | 1.80E-03 | 0.0103 |
| DPY19L1          | 1.08 | 7.64E-03 | 0.0240 |
| EAF2             | 1.08 | 4.00E-03 | 0.0161 |
| SNRNP70          | 1.08 | 1.81E-03 | 0.0104 |
| PAXIP1           | 1.08 | 1.34E-03 | 0.0088 |
| FADD             | 1.08 | 1.78E-03 | 0.0103 |
| FASTKD2          | 1.08 | 1.67E-03 | 0.0100 |
| ENST000003360530 | 1.08 | 1.30E-03 | 0.0087 |
| PRMT3            | 1.08 | 8.79E-03 | 0.0263 |

|                  |      |          |        |
|------------------|------|----------|--------|
| NTAN1            | 1.08 | 2.35E-03 | 0.0121 |
| TPRKB            | 1.08 | 2.69E-03 | 0.0130 |
| XPOT             | 1.08 | 3.46E-03 | 0.0148 |
| URB1             | 1.08 | 2.37E-03 | 0.0121 |
| CAND1            | 1.08 | 1.17E-03 | 0.0083 |
| BAP1             | 1.07 | 1.70E-03 | 0.0101 |
| TPM3             | 1.07 | 1.15E-03 | 0.0082 |
| DNM1L            | 1.07 | 9.81E-04 | 0.0077 |
| NT5C             | 1.07 | 1.13E-02 | 0.0311 |
| SNU13            | 1.07 | 1.23E-03 | 0.0085 |
| ACSF2            | 1.07 | 4.87E-03 | 0.0182 |
| ME2              | 1.07 | 1.65E-03 | 0.0099 |
| POLR2L           | 1.07 | 8.77E-03 | 0.0262 |
| ENST000002642540 | 1.07 | 2.90E-03 | 0.0135 |
| HNRNPK           | 1.07 | 9.97E-04 | 0.0077 |
| MTPAP            | 1.07 | 4.34E-03 | 0.0170 |
| ENST000003209854 | 1.07 | 6.38E-03 | 0.0215 |
| THUMPD2          | 1.07 | 1.08E-03 | 0.0080 |
| PCNP             | 1.07 | 9.71E-04 | 0.0076 |
| ENST000002161211 | 1.07 | 2.26E-03 | 0.0118 |
| PCGF6            | 1.07 | 3.83E-03 | 0.0157 |
| CBX5             | 1.07 | 4.28E-03 | 0.0168 |
| IAH1             | 1.07 | 1.23E-03 | 0.0085 |
| USP13            | 1.07 | 3.23E-03 | 0.0142 |
| FGFBP3           | 1.07 | 1.86E-02 | 0.0439 |
| PPM1F            | 1.07 | 2.86E-03 | 0.0134 |
| NLRX1            | 1.07 | 8.37E-03 | 0.0255 |
| GTSF1            | 1.07 | 1.99E-02 | 0.0459 |
| TTF2             | 1.07 | 1.16E-03 | 0.0082 |
| SMC3             | 1.07 | 1.24E-03 | 0.0085 |
| CLTC             | 1.07 | 1.35E-03 | 0.0089 |
| RELT             | 1.07 | 2.18E-03 | 0.0115 |
| AC009779.2       | 1.07 | 1.88E-02 | 0.0441 |
| GPX4             | 1.07 | 1.72E-03 | 0.0101 |
| UBE2I            | 1.07 | 1.05E-03 | 0.0079 |
| CHMP2A           | 1.07 | 1.90E-02 | 0.0444 |
| ENST000003119431 | 1.07 | 3.81E-03 | 0.0157 |
| NIPA2            | 1.06 | 6.25E-03 | 0.0212 |
| ENST000002457960 | 1.06 | 3.10E-03 | 0.0140 |
| ENST000002623023 | 1.06 | 8.55E-03 | 0.0258 |
| CASP3            | 1.06 | 3.96E-03 | 0.0160 |
| ENST000002168071 | 1.06 | 5.73E-03 | 0.0201 |
| NCBP2            | 1.06 | 2.23E-03 | 0.0117 |
| RITA1            | 1.06 | 6.22E-03 | 0.0211 |
| EXOSC9           | 1.06 | 1.32E-03 | 0.0087 |
| MDM2             | 1.06 | 5.88E-03 | 0.0204 |
| ENST000003018210 | 1.06 | 1.63E-02 | 0.0399 |
| MLLT1            | 1.06 | 3.75E-03 | 0.0156 |
| NFU1             | 1.06 | 3.13E-03 | 0.0140 |
| MRPL46           | 1.06 | 1.29E-02 | 0.0338 |

|                  |      |          |        |
|------------------|------|----------|--------|
| MED30            | 1.06 | 1.75E-03 | 0.0102 |
| EMC3-AS1         | 1.06 | 3.95E-03 | 0.0160 |
| ENST000002693730 | 1.06 | 9.86E-03 | 0.0283 |
| RAC1             | 1.06 | 1.06E-03 | 0.0079 |
| TMEM256          | 1.06 | 1.47E-02 | 0.0370 |
| SEC24A           | 1.06 | 1.74E-03 | 0.0102 |
| DLG5             | 1.06 | 2.23E-02 | 0.0499 |
| SCO2             | 1.06 | 4.33E-03 | 0.0169 |
| AC083880.1       | 1.06 | 2.21E-02 | 0.0496 |
| ENST000002161902 | 1.06 | 3.95E-03 | 0.0160 |
| RRP1B            | 1.06 | 2.61E-03 | 0.0127 |
| ENST00000639674  | 1.06 | 5.44E-03 | 0.0194 |
| DUSP1            | 1.06 | 1.71E-02 | 0.0411 |
| MRPS10           | 1.06 | 1.55E-03 | 0.0096 |
| ENST000002686680 | 1.05 | 1.49E-03 | 0.0094 |
| DNAJC2           | 1.05 | 9.18E-03 | 0.0270 |
| DMD              | 1.05 | 7.74E-03 | 0.0242 |
| HNRNPA2B1        | 1.05 | 1.98E-03 | 0.0109 |
| EXOSC5           | 1.05 | 2.84E-03 | 0.0134 |
| RABEPK           | 1.05 | 8.85E-03 | 0.0264 |
| FAHD2A           | 1.05 | 1.89E-03 | 0.0106 |
| CAPZA2           | 1.05 | 1.57E-03 | 0.0097 |
| ARPC4            | 1.05 | 1.09E-03 | 0.0080 |
| BCAP29           | 1.05 | 3.02E-03 | 0.0137 |
| ENST000003181580 | 1.05 | 2.66E-03 | 0.0129 |
| DDB2             | 1.05 | 1.46E-03 | 0.0093 |
| PPIE             | 1.05 | 4.88E-03 | 0.0182 |
| TTC33            | 1.05 | 2.02E-03 | 0.0110 |
| GYS1             | 1.05 | 2.18E-03 | 0.0115 |
| U2AF2            | 1.05 | 1.42E-03 | 0.0091 |
| APOPT1           | 1.05 | 2.10E-03 | 0.0113 |
| RIC8A            | 1.05 | 1.12E-03 | 0.0081 |
| SPATA5           | 1.05 | 3.81E-03 | 0.0157 |
| CAD              | 1.05 | 2.42E-03 | 0.0122 |
| THUMPD3          | 1.05 | 3.05E-03 | 0.0139 |
| TTF1             | 1.05 | 1.13E-03 | 0.0081 |
| SLC19A2          | 1.05 | 1.67E-02 | 0.0406 |
| ACADVL           | 1.05 | 3.58E-03 | 0.0151 |
| TRAF3            | 1.05 | 5.73E-03 | 0.0201 |
| YIF1A            | 1.05 | 3.05E-03 | 0.0139 |
| PBDC1            | 1.05 | 2.68E-03 | 0.0129 |
| OVCA2            | 1.05 | 4.76E-03 | 0.0179 |
| BAK1             | 1.05 | 9.79E-03 | 0.0282 |
| HINT2            | 1.05 | 6.02E-03 | 0.0207 |
| ENST000003418720 | 1.04 | 1.09E-02 | 0.0303 |
| NDUFC1           | 1.04 | 1.48E-03 | 0.0093 |
| ENST000002516070 | 1.04 | 3.93E-03 | 0.0160 |
| NFKBIL1          | 1.04 | 9.95E-03 | 0.0285 |
| ENST000003031451 | 1.04 | 2.40E-03 | 0.0122 |
| MPG              | 1.04 | 1.62E-03 | 0.0098 |

|                  |      |          |        |
|------------------|------|----------|--------|
| PSME2            | 1.04 | 1.66E-03 | 0.0099 |
| ENST000002536921 | 1.04 | 4.43E-03 | 0.0172 |
| STK3             | 1.04 | 2.38E-03 | 0.0121 |
| C2CD2            | 1.04 | 9.50E-03 | 0.0276 |
| FDFT1            | 1.04 | 2.05E-03 | 0.0111 |
| EFHD2            | 1.04 | 8.16E-03 | 0.0251 |
| INTS2            | 1.04 | 2.46E-03 | 0.0124 |
| AP3M2            | 1.04 | 1.61E-02 | 0.0395 |
| JMJD6            | 1.04 | 1.49E-03 | 0.0094 |
| ACO2             | 1.04 | 3.23E-03 | 0.0142 |
| IFI27L2          | 1.04 | 2.07E-02 | 0.0474 |
| NTHL1            | 1.04 | 1.51E-02 | 0.0377 |
| ACOX3            | 1.04 | 1.80E-03 | 0.0103 |
| USP39            | 1.04 | 2.77E-03 | 0.0132 |
| ZRANB3           | 1.04 | 2.17E-03 | 0.0115 |
| PTK7             | 1.04 | 5.35E-03 | 0.0192 |
| TIMM22           | 1.03 | 1.63E-03 | 0.0099 |
| SNORD11B         | 1.03 | 1.74E-02 | 0.0416 |
| RRS1             | 1.03 | 1.84E-03 | 0.0105 |
| SART3            | 1.03 | 1.22E-03 | 0.0084 |
| ENST000002660871 | 1.03 | 4.79E-03 | 0.0180 |
| ENST000003409130 | 1.03 | 1.42E-03 | 0.0091 |
| ARPC1A           | 1.03 | 6.39E-03 | 0.0215 |
| LCP1             | 1.03 | 8.28E-03 | 0.0253 |
| C16orf95         | 1.03 | 2.08E-02 | 0.0475 |
| ENST000002766920 | 1.03 | 8.62E-03 | 0.0259 |
| GRB2             | 1.03 | 1.17E-03 | 0.0083 |
| PPP4R2           | 1.03 | 1.88E-03 | 0.0106 |
| SKP2             | 1.03 | 7.14E-03 | 0.0231 |
| NDUFS1           | 1.03 | 1.26E-03 | 0.0086 |
| G6PD             | 1.03 | 5.04E-03 | 0.0186 |
| ENST000002750361 | 1.03 | 1.78E-03 | 0.0103 |
| CSNK1E           | 1.03 | 3.12E-03 | 0.0140 |
| SEH1L            | 1.03 | 1.28E-03 | 0.0086 |
| DHX9             | 1.03 | 2.49E-03 | 0.0124 |
| ENST000003383820 | 1.03 | 4.67E-03 | 0.0178 |
| PHETA2           | 1.03 | 5.62E-03 | 0.0198 |
| MED28            | 1.03 | 4.91E-03 | 0.0183 |
| NR2C2AP          | 1.03 | 1.29E-02 | 0.0339 |
| PANX1            | 1.03 | 5.76E-03 | 0.0202 |
| C4orf3           | 1.03 | 1.27E-03 | 0.0086 |
| AARS2            | 1.03 | 3.71E-03 | 0.0155 |
| ENST000002644330 | 1.03 | 1.64E-02 | 0.0399 |
| ADSL             | 1.03 | 3.33E-03 | 0.0145 |
| USP5             | 1.03 | 1.28E-03 | 0.0086 |
| NUFIP1           | 1.03 | 5.01E-03 | 0.0185 |
| MRPS36           | 1.02 | 1.92E-03 | 0.0107 |
| PGP              | 1.02 | 3.45E-03 | 0.0148 |
| HDDC2            | 1.02 | 2.29E-03 | 0.0119 |
| RNF8             | 1.02 | 4.60E-03 | 0.0176 |

|                  |      |          |        |
|------------------|------|----------|--------|
| ENST000003283920 | 1.02 | 1.21E-03 | 0.0084 |
| RINL             | 1.02 | 1.46E-03 | 0.0093 |
| MPDU1            | 1.02 | 1.63E-03 | 0.0098 |
| LIG1             | 1.02 | 2.54E-03 | 0.0125 |
| HACE1            | 1.02 | 1.86E-02 | 0.0438 |
| KIAA0408         | 1.02 | 6.62E-03 | 0.0220 |
| ENST000002643121 | 1.02 | 5.34E-03 | 0.0192 |
| KMT5A            | 1.02 | 2.45E-03 | 0.0123 |
| BTF3L4           | 1.02 | 5.83E-03 | 0.0203 |
| NAA38            | 1.02 | 2.42E-03 | 0.0122 |
| ENST000002100601 | 1.02 | 1.09E-02 | 0.0304 |
| FAM184A          | 1.02 | 1.37E-02 | 0.0353 |
| GPR180           | 1.02 | 3.07E-03 | 0.0139 |
| SLC6A6           | 1.02 | 8.73E-03 | 0.0262 |
| AVEN             | 1.02 | 2.22E-03 | 0.0117 |
| ENST000003006050 | 1.02 | 9.04E-03 | 0.0267 |
| RHNO1            | 1.02 | 1.47E-02 | 0.0370 |
| SOCS1            | 1.02 | 2.21E-02 | 0.0496 |
| RBM10            | 1.02 | 1.57E-03 | 0.0097 |
| CLNS1A           | 1.02 | 2.39E-03 | 0.0122 |
| AL136040.1       | 1.02 | 1.14E-02 | 0.0313 |
| HIF1A            | 1.01 | 2.87E-03 | 0.0134 |
| ENST000003248682 | 1.01 | 2.40E-03 | 0.0122 |
| SNHG5            | 1.01 | 3.21E-03 | 0.0142 |
| PDRG1            | 1.01 | 2.47E-03 | 0.0124 |
| CALR             | 1.01 | 8.88E-03 | 0.0264 |
| ENST000002760792 | 1.01 | 1.25E-03 | 0.0086 |
| C1orf109         | 1.01 | 1.78E-03 | 0.0103 |
| ENST000003116692 | 1.01 | 1.19E-02 | 0.0321 |
| INPP5F           | 1.01 | 2.67E-03 | 0.0129 |
| TERC             | 1.01 | 9.75E-03 | 0.0281 |
| GTF2H4           | 1.01 | 4.63E-03 | 0.0177 |
| AKIP1            | 1.01 | 5.79E-03 | 0.0202 |
| SCRN3            | 1.01 | 6.97E-03 | 0.0228 |
| CDC42            | 1.01 | 1.31E-03 | 0.0087 |
| GLB1             | 1.01 | 2.82E-03 | 0.0133 |
| NELFCD           | 1.01 | 3.62E-03 | 0.0152 |
| ENST000003100782 | 1.00 | 2.42E-03 | 0.0122 |
| SSNA1            | 1.00 | 2.89E-03 | 0.0135 |
| ENST000003273001 | 1.00 | 1.40E-03 | 0.0091 |
| SLC27A4          | 1.00 | 5.40E-03 | 0.0194 |
| ARPP19           | 1.00 | 2.16E-03 | 0.0114 |
| CPOX             | 1.00 | 3.11E-03 | 0.0140 |
| TNIP1            | 1.00 | 8.64E-03 | 0.0260 |
| COPS4            | 1.00 | 1.73E-03 | 0.0102 |
| COPS9            | 1.00 | 3.28E-03 | 0.0144 |
| UBE2J1           | 1.00 | 1.34E-03 | 0.0088 |
| STX10            | 1.00 | 6.12E-03 | 0.0209 |
| PHAX             | 1.00 | 1.65E-03 | 0.0099 |
| NMD3             | 1.00 | 8.35E-03 | 0.0254 |

|                  |      |          |        |
|------------------|------|----------|--------|
| TFB1M            | 1.00 | 1.67E-03 | 0.0100 |
| PIP5K1A          | 1.00 | 1.67E-03 | 0.0100 |
| ENST000003316660 | 1.00 | 1.14E-02 | 0.0313 |
| NUP54            | 1.00 | 1.95E-03 | 0.0108 |
| WDR1             | 1.00 | 3.93E-03 | 0.0160 |
| ENST000003336510 | 1.00 | 2.15E-03 | 0.0114 |
| METTL2B          | 1.00 | 3.76E-03 | 0.0156 |
| TCF3             | 1.00 | 3.36E-03 | 0.0146 |
| RSL1D1           | 1.00 | 1.59E-03 | 0.0097 |
| PSMG2            | 1.00 | 1.74E-03 | 0.0102 |
| NUP188           | 1.00 | 2.16E-03 | 0.0114 |
| TGIF2            | 1.00 | 1.87E-03 | 0.0105 |
| PEF1             | 0.99 | 1.87E-03 | 0.0105 |
| MID1IP1          | 0.99 | 2.41E-03 | 0.0122 |
| DANCR            | 0.99 | 5.35E-03 | 0.0192 |
| ENST000002549502 | 0.99 | 7.86E-03 | 0.0245 |
| FTSJ3            | 0.99 | 3.57E-03 | 0.0151 |
| MRPL43           | 0.99 | 7.81E-03 | 0.0244 |
| C17orf75         | 0.99 | 2.41E-03 | 0.0122 |
| ARL6IP4          | 0.99 | 1.68E-03 | 0.0100 |
| HSCB             | 0.99 | 1.94E-02 | 0.0452 |
| FAM20B           | 0.99 | 1.46E-03 | 0.0093 |
| NDE1             | 0.99 | 5.42E-03 | 0.0194 |
| ZNF664           | 0.99 | 2.78E-03 | 0.0132 |
| B3GNT10          | 0.99 | 3.50E-03 | 0.0149 |
| HIBADH           | 0.99 | 1.91E-03 | 0.0107 |
| MYO1G            | 0.99 | 4.31E-03 | 0.0169 |
| STT3A            | 0.99 | 2.10E-03 | 0.0113 |
| ATP6V1A          | 0.99 | 3.43E-03 | 0.0148 |
| PPP1R16A         | 0.99 | 1.41E-02 | 0.0360 |
| CAPRIN1          | 0.99 | 1.49E-03 | 0.0094 |
| CBR3             | 0.99 | 2.78E-03 | 0.0132 |
| MRRF             | 0.99 | 1.50E-03 | 0.0094 |
| OCRL             | 0.99 | 1.10E-02 | 0.0304 |
| KIAA0100         | 0.99 | 1.41E-03 | 0.0091 |
| ENST000003101440 | 0.99 | 7.53E-03 | 0.0238 |
| ENST000003369150 | 0.99 | 1.83E-02 | 0.0434 |
| PPP2R5B          | 0.99 | 2.84E-03 | 0.0133 |
| BUD23            | 0.99 | 1.98E-03 | 0.0108 |
| SNX4             | 0.99 | 1.48E-03 | 0.0093 |
| GNB2             | 0.98 | 2.29E-03 | 0.0119 |
| UBE2E1           | 0.98 | 6.19E-03 | 0.0211 |
| PEBP1            | 0.98 | 2.93E-03 | 0.0135 |
| ENST000002292682 | 0.98 | 3.52E-03 | 0.0150 |
| PSMD6            | 0.98 | 2.63E-03 | 0.0128 |
| DCAF12           | 0.98 | 2.24E-03 | 0.0117 |
| ZW10             | 0.98 | 1.81E-03 | 0.0104 |
| CCP110           | 0.98 | 4.38E-03 | 0.0171 |
| ATP23            | 0.98 | 5.43E-03 | 0.0194 |
| ATP6VOB          | 0.98 | 9.31E-03 | 0.0272 |

|                  |      |          |        |
|------------------|------|----------|--------|
| CUL1             | 0.98 | 1.47E-03 | 0.0093 |
| ELP6             | 0.98 | 6.37E-03 | 0.0215 |
| NF1              | 0.98 | 1.44E-03 | 0.0092 |
| CSKMT            | 0.98 | 1.89E-02 | 0.0443 |
| ZNF544           | 0.98 | 1.14E-02 | 0.0313 |
| PURB             | 0.98 | 2.25E-03 | 0.0118 |
| PRPF19           | 0.98 | 3.72E-03 | 0.0155 |
| RSL24D1          | 0.98 | 2.77E-03 | 0.0132 |
| LANCL2           | 0.98 | 8.49E-03 | 0.0257 |
| APEX1            | 0.98 | 2.05E-03 | 0.0111 |
| PWP1             | 0.98 | 2.69E-03 | 0.0130 |
| DFFA             | 0.98 | 4.51E-03 | 0.0174 |
| MRPS33           | 0.97 | 3.39E-03 | 0.0147 |
| RPL35            | 0.97 | 1.53E-03 | 0.0095 |
| POU2F2           | 0.97 | 1.27E-02 | 0.0335 |
| GLE1             | 0.97 | 1.81E-03 | 0.0104 |
| MAPKAPK2         | 0.97 | 4.68E-03 | 0.0178 |
| AMPD2            | 0.97 | 9.93E-03 | 0.0285 |
| MTA2             | 0.97 | 2.58E-03 | 0.0127 |
| KCMF1            | 0.97 | 2.53E-03 | 0.0125 |
| LSM1             | 0.97 | 2.41E-03 | 0.0122 |
| ENST000002828910 | 0.97 | 1.71E-02 | 0.0411 |
| COPS6            | 0.97 | 3.77E-03 | 0.0156 |
| SPATA20          | 0.97 | 1.92E-02 | 0.0447 |
| PDCD11           | 0.97 | 2.82E-03 | 0.0133 |
| POLR1E           | 0.97 | 2.61E-03 | 0.0127 |
| MTG1             | 0.97 | 1.15E-02 | 0.0314 |
| POP4             | 0.97 | 1.59E-03 | 0.0097 |
| SNORD101         | 0.97 | 2.04E-02 | 0.0468 |
| PNP              | 0.97 | 3.65E-03 | 0.0153 |
| ENST000002617722 | 0.97 | 1.47E-02 | 0.0370 |
| CEP57            | 0.97 | 2.90E-03 | 0.0135 |
| RPS2             | 0.96 | 1.64E-03 | 0.0099 |
| TMEM141          | 0.96 | 7.34E-03 | 0.0234 |
| RASSF1           | 0.96 | 2.66E-03 | 0.0129 |
| FAHD1            | 0.96 | 2.95E-03 | 0.0136 |
| E2F2             | 0.96 | 1.56E-02 | 0.0387 |
| SCMH1            | 0.96 | 4.14E-03 | 0.0165 |
| SNX12            | 0.96 | 2.82E-03 | 0.0133 |
| UBA6             | 0.96 | 1.59E-03 | 0.0097 |
| GFM1             | 0.96 | 2.72E-03 | 0.0130 |
| SMARCD2          | 0.96 | 2.00E-03 | 0.0109 |
| ABRACL           | 0.96 | 3.80E-03 | 0.0157 |
| PYCR3            | 0.96 | 9.00E-03 | 0.0267 |
| LDLR             | 0.96 | 8.96E-03 | 0.0266 |
| DDX56            | 0.96 | 1.91E-03 | 0.0106 |
| SPINDOC          | 0.96 | 8.39E-03 | 0.0255 |
| VMA21            | 0.96 | 6.54E-03 | 0.0218 |
| HDX              | 0.96 | 1.45E-02 | 0.0367 |
| RAD21            | 0.96 | 5.03E-03 | 0.0185 |

|                  |      |          |        |
|------------------|------|----------|--------|
| HDGFL2           | 0.96 | 1.99E-03 | 0.0109 |
| MCRIP2           | 0.96 | 4.87E-03 | 0.0182 |
| NAXE             | 0.96 | 7.17E-03 | 0.0231 |
| HNRNPR           | 0.96 | 2.34E-03 | 0.0120 |
| MRPL35           | 0.96 | 2.32E-03 | 0.0120 |
| UHRF1BP1         | 0.96 | 1.91E-03 | 0.0106 |
| ZNF121           | 0.95 | 6.62E-03 | 0.0220 |
| PRCP             | 0.95 | 5.65E-03 | 0.0199 |
| DDX10            | 0.95 | 2.75E-03 | 0.0131 |
| ENST000003079610 | 0.95 | 3.87E-03 | 0.0158 |
| GSS              | 0.95 | 6.81E-03 | 0.0224 |
| ENST000002992590 | 0.95 | 2.48E-03 | 0.0124 |
| ENST000002658720 | 0.95 | 4.17E-03 | 0.0166 |
| ENST000003013290 | 0.95 | 2.27E-03 | 0.0118 |
| SRSF7            | 0.95 | 3.37E-03 | 0.0146 |
| AC008543.1       | 0.95 | 1.25E-02 | 0.0331 |
| EXOC5            | 0.95 | 2.80E-03 | 0.0133 |
| G3BP1            | 0.95 | 2.04E-03 | 0.0110 |
| AC245060.4       | 0.95 | 1.05E-02 | 0.0295 |
| ZBTB10           | 0.95 | 1.32E-02 | 0.0343 |
| HCCS             | 0.95 | 3.38E-03 | 0.0146 |
| AC020928.1       | 0.95 | 1.63E-02 | 0.0397 |
| SRP14            | 0.95 | 1.45E-02 | 0.0368 |
| AC011815.1       | 0.95 | 9.08E-03 | 0.0268 |
| MAT2A            | 0.95 | 6.21E-03 | 0.0211 |
| ABCA3            | 0.95 | 1.41E-02 | 0.0361 |
| CCDC43           | 0.95 | 7.68E-03 | 0.0241 |
| BAZ1B            | 0.95 | 1.86E-03 | 0.0105 |
| FASTKD1          | 0.95 | 1.88E-03 | 0.0106 |
| PPP1R15A         | 0.95 | 8.35E-03 | 0.0254 |
| SNRNP27          | 0.95 | 3.13E-03 | 0.0140 |
| ARMC10           | 0.95 | 4.79E-03 | 0.0180 |
| GSPT1            | 0.95 | 3.43E-03 | 0.0147 |
| DOLPP1           | 0.94 | 5.92E-03 | 0.0205 |
| ELOF1            | 0.94 | 4.78E-03 | 0.0180 |
| CENPBD1P1        | 0.94 | 4.16E-03 | 0.0165 |
| ORC3             | 0.94 | 1.73E-03 | 0.0102 |
| RBL1             | 0.94 | 2.79E-03 | 0.0132 |
| TSPAN5           | 0.94 | 3.06E-03 | 0.0139 |
| TMEM241          | 0.94 | 2.01E-02 | 0.0463 |
| PITHD1           | 0.94 | 1.88E-03 | 0.0106 |
| MRPL30           | 0.94 | 1.84E-03 | 0.0105 |
| NDUFAF3          | 0.94 | 1.33E-02 | 0.0345 |
| DNAJC8           | 0.94 | 2.07E-03 | 0.0112 |
| ENST000003141380 | 0.94 | 3.14E-03 | 0.0140 |
| TCERG1           | 0.94 | 1.72E-03 | 0.0101 |
| TRUB2            | 0.94 | 3.98E-03 | 0.0161 |
| KAT5             | 0.94 | 3.07E-03 | 0.0139 |
| COMMD8           | 0.94 | 2.26E-03 | 0.0118 |
| ARMCX6           | 0.94 | 3.00E-03 | 0.0137 |

|                  |      |          |        |
|------------------|------|----------|--------|
| ENST000002547300 | 0.93 | 1.29E-02 | 0.0339 |
| NOB1             | 0.93 | 4.94E-03 | 0.0183 |
| CHRFAM7A         | 0.93 | 2.06E-02 | 0.0472 |
| RSC1A1           | 0.93 | 1.01E-02 | 0.0287 |
| ARL2             | 0.93 | 3.47E-03 | 0.0149 |
| NDUFC2           | 0.93 | 4.81E-03 | 0.0180 |
| SMU1             | 0.93 | 2.28E-03 | 0.0119 |
| PAF1             | 0.93 | 2.38E-03 | 0.0121 |
| TSR3             | 0.93 | 3.38E-03 | 0.0146 |
| CIDEB            | 0.93 | 5.97E-03 | 0.0206 |
| THOC7            | 0.93 | 4.22E-03 | 0.0167 |
| ATPAF1           | 0.93 | 2.04E-03 | 0.0111 |
| PSMD5            | 0.93 | 1.88E-03 | 0.0106 |
| LYPLA2           | 0.93 | 4.47E-03 | 0.0173 |
| PTOV1            | 0.93 | 3.85E-03 | 0.0158 |
| POLB             | 0.93 | 2.03E-03 | 0.0110 |
| ENST000003108640 | 0.93 | 2.29E-03 | 0.0119 |
| CSTF1            | 0.93 | 2.14E-03 | 0.0114 |
| CFL1             | 0.93 | 1.32E-02 | 0.0344 |
| TARS2            | 0.93 | 5.65E-03 | 0.0199 |
| SRPRB            | 0.93 | 9.42E-03 | 0.0274 |
| C12orf10         | 0.93 | 4.23E-03 | 0.0167 |
| EMC4             | 0.93 | 3.00E-03 | 0.0137 |
| ZMPSTE24         | 0.93 | 4.74E-03 | 0.0179 |
| AC007996.1       | 0.93 | 7.73E-03 | 0.0242 |
| ALKBH1           | 0.93 | 3.33E-03 | 0.0145 |
| ENST000002988182 | 0.93 | 1.68E-02 | 0.0407 |
| GPHN             | 0.93 | 4.21E-03 | 0.0167 |
| KDM1A            | 0.92 | 2.86E-03 | 0.0134 |
| CBWD2            | 0.92 | 3.15E-03 | 0.0141 |
| DUS4L            | 0.92 | 6.73E-03 | 0.0223 |
| RPN1             | 0.92 | 8.54E-03 | 0.0258 |
| CD81             | 0.92 | 4.50E-03 | 0.0174 |
| MYBBP1A          | 0.92 | 6.09E-03 | 0.0209 |
| COPS8            | 0.92 | 5.48E-03 | 0.0195 |
| NME7             | 0.92 | 2.24E-03 | 0.0117 |
| TBL1XR1          | 0.92 | 3.89E-03 | 0.0159 |
| PARD6A           | 0.92 | 1.49E-02 | 0.0374 |
| TKT              | 0.92 | 9.62E-03 | 0.0278 |
| GPAA1            | 0.92 | 9.63E-03 | 0.0279 |
| ENST000003027460 | 0.92 | 2.48E-03 | 0.0124 |
| TTC1             | 0.92 | 2.28E-03 | 0.0119 |
| CTSZ             | 0.92 | 2.81E-03 | 0.0133 |
| CLIC1            | 0.92 | 6.57E-03 | 0.0219 |
| TPD52L2          | 0.92 | 7.75E-03 | 0.0242 |
| CPSF4            | 0.92 | 2.45E-03 | 0.0123 |
| POLR2C           | 0.92 | 4.46E-03 | 0.0173 |
| BIVM             | 0.92 | 2.92E-03 | 0.0135 |
| RPS6KA1          | 0.92 | 8.62E-03 | 0.0259 |
| POLR2D           | 0.92 | 3.29E-03 | 0.0144 |

|                  |      |          |        |
|------------------|------|----------|--------|
| TSN              | 0.92 | 2.04E-03 | 0.0111 |
| BLOC1S1          | 0.92 | 5.16E-03 | 0.0188 |
| ARHGEF35         | 0.92 | 6.75E-03 | 0.0223 |
| NCLN             | 0.92 | 1.63E-02 | 0.0399 |
| DNAJB2           | 0.92 | 2.80E-03 | 0.0133 |
| ATL2             | 0.92 | 3.85E-03 | 0.0158 |
| TRUB1            | 0.92 | 6.92E-03 | 0.0227 |
| VTA1             | 0.92 | 1.97E-03 | 0.0108 |
| ENST000003220671 | 0.91 | 4.71E-03 | 0.0178 |
| ANP32B           | 0.91 | 1.95E-03 | 0.0108 |
| HARS             | 0.91 | 2.23E-03 | 0.0117 |
| RPL7             | 0.91 | 3.03E-03 | 0.0138 |
| SLAMF6           | 0.91 | 1.49E-02 | 0.0374 |
| INIP             | 0.91 | 1.98E-03 | 0.0109 |
| TRMT61B          | 0.91 | 1.53E-02 | 0.0382 |
| BCS1L            | 0.91 | 3.17E-03 | 0.0141 |
| ESF1             | 0.91 | 5.70E-03 | 0.0200 |
| B3GALT6          | 0.91 | 8.39E-03 | 0.0255 |
| ENST000003494310 | 0.91 | 4.59E-03 | 0.0176 |
| MAPRE1           | 0.91 | 2.55E-03 | 0.0126 |
| COX5B            | 0.91 | 3.93E-03 | 0.0160 |
| GON7             | 0.91 | 6.10E-03 | 0.0209 |
| DHRS4            | 0.91 | 6.24E-03 | 0.0212 |
| SDHD             | 0.91 | 2.55E-03 | 0.0126 |
| COMMD1           | 0.91 | 4.56E-03 | 0.0175 |
| GTF3C4           | 0.91 | 2.07E-03 | 0.0111 |
| SENP8            | 0.91 | 7.04E-03 | 0.0229 |
| TIPRL            | 0.91 | 2.17E-03 | 0.0114 |
| RTEL1            | 0.91 | 1.65E-02 | 0.0402 |
| MRPL32           | 0.91 | 2.33E-03 | 0.0120 |
| FBXW11           | 0.91 | 5.11E-03 | 0.0187 |
| NUP43            | 0.91 | 3.61E-03 | 0.0152 |
| IER3IP1          | 0.91 | 4.37E-03 | 0.0171 |
| SCYL1            | 0.90 | 3.01E-03 | 0.0137 |
| GMFB             | 0.90 | 4.71E-03 | 0.0178 |
| RPL6P27          | 0.90 | 8.88E-03 | 0.0264 |
| GLS              | 0.90 | 2.53E-03 | 0.0125 |
| BCAT2            | 0.90 | 2.03E-02 | 0.0467 |
| METTL2A          | 0.90 | 2.42E-03 | 0.0122 |
| TMEM165          | 0.90 | 2.53E-03 | 0.0125 |
| PTPDC1           | 0.90 | 1.03E-02 | 0.0291 |
| RBM15            | 0.90 | 1.99E-03 | 0.0109 |
| CORO1B           | 0.90 | 3.53E-03 | 0.0150 |
| POLE3            | 0.90 | 6.45E-03 | 0.0217 |
| RRP8             | 0.90 | 4.03E-03 | 0.0162 |
| FNTB             | 0.90 | 4.41E-03 | 0.0172 |
| DPY30            | 0.90 | 3.21E-03 | 0.0142 |
| DDX12P           | 0.90 | 7.11E-03 | 0.0230 |
| VKORC1           | 0.90 | 1.00E-02 | 0.0286 |
| IMP3             | 0.90 | 4.86E-03 | 0.0181 |

|                  |      |          |        |
|------------------|------|----------|--------|
| BABAM2           | 0.90 | 1.11E-02 | 0.0306 |
| TMCO3            | 0.90 | 4.59E-03 | 0.0176 |
| QRSL1            | 0.90 | 3.55E-03 | 0.0150 |
| NDUFS2           | 0.90 | 2.65E-03 | 0.0128 |
| APEX2            | 0.90 | 5.30E-03 | 0.0191 |
| IVNS1ABP         | 0.90 | 5.76E-03 | 0.0202 |
| DTD2             | 0.90 | 4.73E-03 | 0.0179 |
| CCDC77           | 0.90 | 4.52E-03 | 0.0174 |
| EIF2AK4          | 0.90 | 3.29E-03 | 0.0144 |
| MT-ND2           | 0.90 | 3.76E-03 | 0.0156 |
| SEPHS1           | 0.90 | 4.42E-03 | 0.0172 |
| AP2M1            | 0.90 | 5.92E-03 | 0.0205 |
| SEC11C           | 0.90 | 3.68E-03 | 0.0154 |
| ZFP1             | 0.90 | 2.96E-03 | 0.0136 |
| PAGR1            | 0.89 | 6.61E-03 | 0.0220 |
| SVIL-AS1         | 0.89 | 2.23E-02 | 0.0499 |
| EXOSC7           | 0.89 | 3.23E-03 | 0.0142 |
| ACOT13           | 0.89 | 4.66E-03 | 0.0177 |
| MYL6             | 0.89 | 3.77E-03 | 0.0156 |
| NUDT19           | 0.89 | 7.52E-03 | 0.0238 |
| TARBP2           | 0.89 | 1.23E-02 | 0.0328 |
| ENST000002557590 | 0.89 | 2.53E-03 | 0.0125 |
| ENST000002209660 | 0.89 | 1.95E-02 | 0.0453 |
| TMX2             | 0.89 | 1.30E-02 | 0.0341 |
| CWC15            | 0.89 | 2.27E-03 | 0.0118 |
| ILF3             | 0.89 | 2.11E-03 | 0.0113 |
| POT1             | 0.89 | 2.31E-03 | 0.0119 |
| UTP4             | 0.89 | 4.21E-03 | 0.0167 |
| SGCB             | 0.89 | 1.20E-02 | 0.0322 |
| AKR7A2           | 0.89 | 2.88E-03 | 0.0134 |
| TAF5             | 0.89 | 9.81E-03 | 0.0282 |
| PDCL             | 0.89 | 3.56E-03 | 0.0151 |
| NOM1             | 0.89 | 7.16E-03 | 0.0231 |
| MIPEP            | 0.89 | 9.15E-03 | 0.0269 |
| NPTN             | 0.89 | 3.34E-03 | 0.0145 |
| ENST000002611822 | 0.89 | 6.13E-03 | 0.0210 |
| SSBP1            | 0.89 | 4.10E-03 | 0.0164 |
| MT-ND5           | 0.89 | 4.80E-03 | 0.0180 |
| GCN1             | 0.89 | 3.96E-03 | 0.0160 |
| BCAS2            | 0.89 | 3.88E-03 | 0.0159 |
| TRAPPC4          | 0.89 | 1.71E-02 | 0.0411 |
| ENST000002964110 | 0.89 | 9.90E-03 | 0.0284 |
| ZUP1             | 0.89 | 3.24E-03 | 0.0143 |
| FUBP3            | 0.89 | 3.24E-03 | 0.0142 |
| CKAP4            | 0.89 | 5.26E-03 | 0.0190 |
| ENST000003219193 | 0.89 | 1.04E-02 | 0.0293 |
| ATN1             | 0.89 | 1.14E-02 | 0.0312 |
| NDUFA11          | 0.89 | 1.15E-02 | 0.0314 |
| MED19            | 0.89 | 9.39E-03 | 0.0274 |
| NFKBIB           | 0.89 | 1.85E-02 | 0.0436 |

|                  |      |          |        |
|------------------|------|----------|--------|
| LIN54            | 0.89 | 3.01E-03 | 0.0137 |
| TCTN1            | 0.89 | 7.17E-03 | 0.0231 |
| EXOSC3           | 0.89 | 3.21E-03 | 0.0142 |
| TAX1BP3          | 0.89 | 1.86E-02 | 0.0438 |
| ZNF598           | 0.88 | 6.58E-03 | 0.0219 |
| HNRNPA0          | 0.88 | 2.97E-03 | 0.0136 |
| SLC5A6           | 0.88 | 1.11E-02 | 0.0307 |
| MLEC             | 0.88 | 1.01E-02 | 0.0288 |
| VPS35            | 0.88 | 4.70E-03 | 0.0178 |
| CEP131           | 0.88 | 5.34E-03 | 0.0192 |
| PLOD2            | 0.88 | 8.62E-03 | 0.0259 |
| KPNA3            | 0.88 | 2.90E-03 | 0.0135 |
| ECHDC1           | 0.88 | 2.90E-03 | 0.0135 |
| UBR5             | 0.88 | 2.30E-03 | 0.0119 |
| SRF              | 0.88 | 4.52E-03 | 0.0174 |
| LETM2            | 0.88 | 2.23E-02 | 0.0499 |
| LEO1             | 0.88 | 3.78E-03 | 0.0156 |
| ZNF93            | 0.88 | 7.09E-03 | 0.0230 |
| EEF1AKNMT        | 0.88 | 6.47E-03 | 0.0217 |
| ENST000003331672 | 0.88 | 6.15E-03 | 0.0210 |
| UBL5             | 0.88 | 2.31E-03 | 0.0119 |
| CAAP1            | 0.88 | 3.49E-03 | 0.0149 |
| IFT52            | 0.88 | 5.29E-03 | 0.0191 |
| SSSCA1           | 0.88 | 1.77E-02 | 0.0423 |
| RDH11            | 0.88 | 3.69E-03 | 0.0154 |
| RAB1A            | 0.88 | 2.88E-03 | 0.0134 |
| ENST000003085801 | 0.88 | 6.34E-03 | 0.0214 |
| MAPKAP1          | 0.88 | 4.03E-03 | 0.0162 |
| HRAS             | 0.88 | 2.00E-02 | 0.0460 |
| NUS1             | 0.87 | 4.30E-03 | 0.0169 |
| COQ7             | 0.87 | 6.75E-03 | 0.0223 |
| ADAT2            | 0.87 | 8.48E-03 | 0.0257 |
| ENST00000344736  | 0.87 | 2.04E-02 | 0.0468 |
| CSNK2B           | 0.87 | 8.11E-03 | 0.0250 |
| DNAJC11          | 0.87 | 2.85E-03 | 0.0134 |
| THRAP3           | 0.87 | 2.50E-03 | 0.0124 |
| ENST000003282731 | 0.87 | 1.76E-02 | 0.0421 |
| PITPNA-AS1       | 0.87 | 1.61E-02 | 0.0395 |
| TTC7A            | 0.87 | 1.57E-02 | 0.0388 |
| SRSF10           | 0.87 | 3.50E-03 | 0.0149 |
| ENST000002771650 | 0.87 | 4.08E-03 | 0.0163 |
| SLC25A17         | 0.87 | 4.05E-03 | 0.0162 |
| LETM1            | 0.87 | 4.03E-03 | 0.0162 |
| MYC              | 0.87 | 9.40E-03 | 0.0274 |
| ZDHHC18          | 0.87 | 3.11E-03 | 0.0140 |
| AFAP1            | 0.87 | 2.06E-02 | 0.0471 |
| RNF40            | 0.87 | 3.70E-03 | 0.0154 |
| DDT              | 0.87 | 3.80E-03 | 0.0157 |
| TRMT2A           | 0.87 | 2.14E-02 | 0.0485 |
| TBC1D9B          | 0.87 | 3.93E-03 | 0.0160 |

|                  |      |          |        |
|------------------|------|----------|--------|
| TOMM70           | 0.87 | 2.93E-03 | 0.0135 |
| DDX23            | 0.87 | 4.14E-03 | 0.0165 |
| FYN              | 0.87 | 3.37E-03 | 0.0146 |
| MGAT4B           | 0.87 | 1.45E-02 | 0.0367 |
| IMPACT           | 0.87 | 7.05E-03 | 0.0229 |
| TTLL4            | 0.87 | 5.23E-03 | 0.0190 |
| ARPC5            | 0.87 | 4.91E-03 | 0.0183 |
| CARNMT1          | 0.87 | 4.96E-03 | 0.0184 |
| CCDC171          | 0.87 | 5.46E-03 | 0.0195 |
| ENST000003088600 | 0.86 | 2.03E-02 | 0.0467 |
| LDAH             | 0.86 | 4.12E-03 | 0.0164 |
| WDR61            | 0.86 | 3.07E-03 | 0.0139 |
| MRPS11           | 0.86 | 4.62E-03 | 0.0176 |
| ENST000002782243 | 0.86 | 1.53E-02 | 0.0380 |
| GBP2             | 0.86 | 4.50E-03 | 0.0174 |
| CTDSPL2          | 0.86 | 3.42E-03 | 0.0147 |
| DHX57            | 0.86 | 3.25E-03 | 0.0143 |
| TMEM258          | 0.86 | 4.81E-03 | 0.0180 |
| UBE3C            | 0.86 | 2.89E-03 | 0.0135 |
| HIVEP1           | 0.86 | 2.48E-03 | 0.0124 |
| ADGRE5           | 0.86 | 7.98E-03 | 0.0247 |
| CAB39            | 0.86 | 4.61E-03 | 0.0176 |
| ENTR1            | 0.86 | 2.56E-03 | 0.0126 |
| ADNP2            | 0.86 | 3.29E-03 | 0.0144 |
| AIMP1            | 0.86 | 4.22E-03 | 0.0167 |
| BTBD1            | 0.86 | 3.34E-03 | 0.0145 |
| CHAMP1           | 0.86 | 1.38E-02 | 0.0355 |
| ARV1             | 0.86 | 4.74E-03 | 0.0179 |
| PDHX             | 0.86 | 4.09E-03 | 0.0164 |
| HSDL2            | 0.86 | 7.04E-03 | 0.0229 |
| ANXA5            | 0.86 | 3.40E-03 | 0.0147 |
| GRAMD4           | 0.86 | 4.45E-03 | 0.0172 |
| CDADC1           | 0.86 | 2.11E-02 | 0.0480 |
| MED8             | 0.86 | 6.18E-03 | 0.0210 |
| CHUK             | 0.86 | 3.29E-03 | 0.0144 |
| RAMAC            | 0.86 | 3.36E-03 | 0.0146 |
| NDUFB1           | 0.86 | 2.66E-03 | 0.0129 |
| ENST000003419230 | 0.86 | 2.98E-03 | 0.0137 |
| SWAP70           | 0.86 | 6.66E-03 | 0.0221 |
| KCTD20           | 0.86 | 2.59E-03 | 0.0127 |
| ACSL3            | 0.85 | 9.57E-03 | 0.0278 |
| RTCA             | 0.85 | 6.90E-03 | 0.0226 |
| SESN2            | 0.85 | 2.00E-02 | 0.0461 |
| ZDHHC14          | 0.85 | 2.05E-02 | 0.0470 |
| DUS1L            | 0.85 | 8.49E-03 | 0.0257 |
| ARMT1            | 0.85 | 2.76E-03 | 0.0131 |
| IQGAP1           | 0.85 | 3.40E-03 | 0.0147 |
| CPSF2            | 0.85 | 4.78E-03 | 0.0180 |
| HIBCH            | 0.85 | 1.42E-02 | 0.0362 |
| MRPL57           | 0.85 | 2.93E-03 | 0.0135 |

|                  |      |          |        |
|------------------|------|----------|--------|
| MCCC2            | 0.85 | 8.24E-03 | 0.0253 |
| ENST000003147970 | 0.85 | 9.20E-03 | 0.0270 |
| NUP133           | 0.85 | 2.60E-03 | 0.0127 |
| SUPV3L1          | 0.85 | 6.99E-03 | 0.0228 |
| PSMD9            | 0.85 | 3.38E-03 | 0.0146 |
| POU2F1           | 0.85 | 5.43E-03 | 0.0194 |
| ARHGAP21         | 0.85 | 3.64E-03 | 0.0153 |
| QSER1            | 0.85 | 4.64E-03 | 0.0177 |
| BCOR             | 0.85 | 4.00E-03 | 0.0161 |
| C2orf69          | 0.85 | 6.44E-03 | 0.0216 |
| PPP2CA           | 0.85 | 2.61E-03 | 0.0127 |
| MFSD14B          | 0.85 | 2.53E-03 | 0.0125 |
| DPP9             | 0.85 | 1.25E-02 | 0.0332 |
| IPO11            | 0.85 | 9.37E-03 | 0.0273 |
| PMM2             | 0.84 | 6.76E-03 | 0.0223 |
| DHRS11           | 0.84 | 1.96E-02 | 0.0455 |
| TNPO2            | 0.84 | 3.56E-03 | 0.0151 |
| CEBPZOS          | 0.84 | 4.78E-03 | 0.0180 |
| TOP1             | 0.84 | 4.61E-03 | 0.0176 |
| RPS2P46          | 0.84 | 1.76E-02 | 0.0420 |
| HSPB11           | 0.84 | 4.61E-03 | 0.0176 |
| GRINA            | 0.84 | 1.71E-02 | 0.0412 |
| TRAK1            | 0.84 | 5.63E-03 | 0.0198 |
| TMEM9            | 0.84 | 1.14E-02 | 0.0312 |
| ENST000002162881 | 0.84 | 2.75E-03 | 0.0131 |
| METTL8           | 0.84 | 2.84E-03 | 0.0134 |
| DDX55            | 0.84 | 3.10E-03 | 0.0140 |
| UPF3B            | 0.84 | 3.20E-03 | 0.0142 |
| KLHL12           | 0.84 | 3.35E-03 | 0.0145 |
| LBR              | 0.84 | 3.70E-03 | 0.0154 |
| PTGES2           | 0.84 | 1.00E-02 | 0.0286 |
| ABHD5            | 0.84 | 8.74E-03 | 0.0262 |
| HDAC3            | 0.84 | 4.07E-03 | 0.0163 |
| ZNF330           | 0.84 | 3.11E-03 | 0.0140 |
| KLHDC3           | 0.84 | 3.97E-03 | 0.0161 |
| INTS14           | 0.84 | 5.86E-03 | 0.0204 |
| GATB             | 0.84 | 4.37E-03 | 0.0170 |
| ENST000002687971 | 0.84 | 6.78E-03 | 0.0223 |
| SPATS2           | 0.84 | 1.50E-02 | 0.0376 |
| DHX35            | 0.84 | 6.99E-03 | 0.0228 |
| MARS             | 0.84 | 1.93E-02 | 0.0449 |
| NAA25            | 0.84 | 4.00E-03 | 0.0161 |
| ECPAS            | 0.84 | 3.17E-03 | 0.0141 |
| AP1AR            | 0.84 | 4.15E-03 | 0.0165 |
| ZDHHC12          | 0.84 | 1.23E-02 | 0.0328 |
| MED24            | 0.84 | 5.82E-03 | 0.0203 |
| SOGA1            | 0.84 | 1.47E-02 | 0.0370 |
| RIOX2            | 0.84 | 1.15E-02 | 0.0314 |
| MMS19            | 0.84 | 5.04E-03 | 0.0186 |
| RAMACL           | 0.84 | 2.20E-02 | 0.0494 |

|                  |      |          |        |
|------------------|------|----------|--------|
| COA3             | 0.84 | 7.30E-03 | 0.0233 |
| CFAP298          | 0.84 | 2.87E-03 | 0.0134 |
| ENST000003346510 | 0.84 | 1.48E-02 | 0.0371 |
| PSMB10           | 0.84 | 2.73E-03 | 0.0131 |
| C3orf33          | 0.84 | 1.36E-02 | 0.0350 |
| RAB10            | 0.84 | 5.92E-03 | 0.0205 |
| ASCC1            | 0.84 | 1.43E-02 | 0.0363 |
| ENST000003105130 | 0.84 | 1.46E-02 | 0.0369 |
| RBM27            | 0.83 | 3.18E-03 | 0.0141 |
| RNF219           | 0.83 | 1.09E-02 | 0.0303 |
| MRPL42           | 0.83 | 2.90E-03 | 0.0135 |
| UAP1L1           | 0.83 | 9.94E-03 | 0.0285 |
| PABPC4           | 0.83 | 3.24E-03 | 0.0142 |
| IL15RA           | 0.83 | 8.83E-03 | 0.0264 |
| PRKRA            | 0.83 | 3.10E-03 | 0.0140 |
| PDCD10           | 0.83 | 3.07E-03 | 0.0139 |
| ZCCHC17          | 0.83 | 4.30E-03 | 0.0169 |
| MTPN             | 0.83 | 4.70E-03 | 0.0178 |
| AGO1             | 0.83 | 8.83E-03 | 0.0264 |
| HSPA1B           | 0.83 | 3.40E-03 | 0.0147 |
| NMT1             | 0.83 | 4.31E-03 | 0.0169 |
| C12orf57         | 0.83 | 9.42E-03 | 0.0274 |
| ARF1             | 0.83 | 8.80E-03 | 0.0263 |
| SMPD4            | 0.83 | 6.30E-03 | 0.0213 |
| ZNF678           | 0.83 | 1.04E-02 | 0.0292 |
| PLEKHG2          | 0.83 | 1.15E-02 | 0.0314 |
| MRPS5            | 0.83 | 3.00E-03 | 0.0137 |
| GTF3C3           | 0.83 | 5.12E-03 | 0.0187 |
| GTF2E2           | 0.83 | 7.14E-03 | 0.0230 |
| RPL8             | 0.83 | 6.87E-03 | 0.0226 |
| U2SURP           | 0.83 | 6.83E-03 | 0.0225 |
| DYNLT3           | 0.82 | 1.97E-02 | 0.0456 |
| CYTIP            | 0.82 | 3.99E-03 | 0.0161 |
| ENST000003274350 | 0.82 | 1.40E-02 | 0.0358 |
| AC091057.6       | 0.82 | 8.54E-03 | 0.0258 |
| ARMH1            | 0.82 | 1.23E-02 | 0.0328 |
| TYW3             | 0.82 | 3.93E-03 | 0.0160 |
| XYL2             | 0.82 | 7.49E-03 | 0.0237 |
| SRSF4            | 0.82 | 3.36E-03 | 0.0146 |
| OGFOD1           | 0.82 | 6.38E-03 | 0.0215 |
| DDX52            | 0.82 | 7.04E-03 | 0.0229 |
| DUSP16           | 0.82 | 1.19E-02 | 0.0321 |
| ELOB             | 0.82 | 6.08E-03 | 0.0208 |
| USP6NL           | 0.82 | 1.93E-02 | 0.0451 |
| RAP1A            | 0.82 | 3.18E-03 | 0.0141 |
| IFT57            | 0.82 | 3.94E-03 | 0.0160 |
| TAF11            | 0.82 | 5.08E-03 | 0.0186 |
| SLC39A3          | 0.82 | 1.01E-02 | 0.0287 |
| GTF2H5           | 0.82 | 4.86E-03 | 0.0181 |
| AKT1             | 0.82 | 5.08E-03 | 0.0186 |

|                  |      |          |        |
|------------------|------|----------|--------|
| HSF1             | 0.82 | 1.22E-02 | 0.0327 |
| DSTYK            | 0.82 | 3.02E-03 | 0.0137 |
| TMEM186          | 0.82 | 6.41E-03 | 0.0215 |
| BAG4             | 0.81 | 3.93E-03 | 0.0160 |
| TRIM25           | 0.81 | 4.21E-03 | 0.0167 |
| CAP1             | 0.81 | 3.51E-03 | 0.0149 |
| LIPT2            | 0.81 | 2.10E-02 | 0.0478 |
| TCEAL1           | 0.81 | 1.69E-02 | 0.0409 |
| DHX30            | 0.81 | 3.14E-03 | 0.0140 |
| ZNF473           | 0.81 | 1.22E-02 | 0.0327 |
| PPID             | 0.81 | 3.66E-03 | 0.0153 |
| TAF9             | 0.81 | 5.33E-03 | 0.0192 |
| SARS             | 0.81 | 6.12E-03 | 0.0209 |
| LARP1B           | 0.81 | 7.38E-03 | 0.0235 |
| ENST000003142892 | 0.81 | 3.11E-03 | 0.0140 |
| ENST000003491570 | 0.81 | 4.91E-03 | 0.0183 |
| ATAD3B           | 0.81 | 1.13E-02 | 0.0310 |
| MPV17L2          | 0.81 | 1.19E-02 | 0.0321 |
| RAP2C            | 0.81 | 5.89E-03 | 0.0204 |
| ALKBH3           | 0.81 | 6.49E-03 | 0.0217 |
| ACOT9            | 0.81 | 3.84E-03 | 0.0158 |
| HSP90B1          | 0.81 | 5.84E-03 | 0.0203 |
| MNAT1            | 0.81 | 9.40E-03 | 0.0274 |
| RNASEH2C         | 0.81 | 5.43E-03 | 0.0194 |
| ZNF232           | 0.81 | 6.05E-03 | 0.0208 |
| MED1             | 0.81 | 4.31E-03 | 0.0169 |
| PISD             | 0.81 | 1.04E-02 | 0.0294 |
| NOP9             | 0.81 | 5.59E-03 | 0.0197 |
| ALG8             | 0.81 | 2.05E-02 | 0.0471 |
| DNTTIP2          | 0.81 | 3.76E-03 | 0.0156 |
| PQLC1            | 0.80 | 1.02E-02 | 0.0289 |
| RPS9             | 0.80 | 4.61E-03 | 0.0176 |
| ST13             | 0.80 | 3.91E-03 | 0.0160 |
| MRPL52           | 0.80 | 9.80E-03 | 0.0282 |
| CLPX             | 0.80 | 4.27E-03 | 0.0168 |
| HAVCR2           | 0.80 | 8.17E-03 | 0.0251 |
| EXOSC10          | 0.80 | 3.70E-03 | 0.0154 |
| GNL3L            | 0.80 | 1.24E-02 | 0.0330 |
| WRN              | 0.80 | 5.49E-03 | 0.0196 |
| ENST000002632024 | 0.80 | 5.60E-03 | 0.0198 |
| DUSP12           | 0.80 | 1.17E-02 | 0.0318 |
| PRPF40A          | 0.80 | 4.12E-03 | 0.0164 |
| SLC39A9          | 0.80 | 4.21E-03 | 0.0167 |
| RRAGA            | 0.80 | 6.32E-03 | 0.0214 |
| CNOT1            | 0.80 | 4.89E-03 | 0.0182 |
| ENST000002501131 | 0.80 | 1.04E-02 | 0.0294 |
| TRMT1            | 0.80 | 6.95E-03 | 0.0227 |
| NDFIP1           | 0.80 | 1.44E-02 | 0.0365 |
| PPP1CA           | 0.80 | 1.13E-02 | 0.0310 |
| CREB3L4          | 0.80 | 2.11E-02 | 0.0480 |

|                  |      |          |        |
|------------------|------|----------|--------|
| MRPS18C          | 0.80 | 3.85E-03 | 0.0158 |
| ARPC1B           | 0.80 | 9.02E-03 | 0.0267 |
| NUP153           | 0.80 | 3.50E-03 | 0.0149 |
| DDOST            | 0.80 | 1.60E-02 | 0.0394 |
| SLC35B4          | 0.80 | 5.26E-03 | 0.0190 |
| BBIP1            | 0.80 | 4.41E-03 | 0.0172 |
| ENST000003155542 | 0.80 | 9.13E-03 | 0.0269 |
| PTGR2            | 0.80 | 1.39E-02 | 0.0357 |
| EWSR1            | 0.79 | 3.86E-03 | 0.0158 |
| RPL22            | 0.79 | 4.25E-03 | 0.0167 |
| APOOL            | 0.79 | 7.66E-03 | 0.0241 |
| SND1             | 0.79 | 4.20E-03 | 0.0166 |
| ENST000002682061 | 0.79 | 4.51E-03 | 0.0174 |
| TRMT6            | 0.79 | 7.93E-03 | 0.0246 |
| PTPMT1           | 0.79 | 5.68E-03 | 0.0200 |
| NUBP1            | 0.79 | 6.61E-03 | 0.0220 |
| ENST000003055360 | 0.79 | 4.57E-03 | 0.0176 |
| ARF5             | 0.79 | 8.47E-03 | 0.0257 |
| ERLIN1           | 0.79 | 5.80E-03 | 0.0203 |
| GOLPH3           | 0.79 | 7.17E-03 | 0.0231 |
| IPP              | 0.79 | 4.79E-03 | 0.0180 |
| EIF3M            | 0.79 | 7.27E-03 | 0.0233 |
| AP5B1            | 0.79 | 1.02E-02 | 0.0289 |
| PUS1             | 0.79 | 4.67E-03 | 0.0178 |
| ALDH5A1          | 0.79 | 8.60E-03 | 0.0259 |
| KIF1C            | 0.79 | 6.60E-03 | 0.0220 |
| NBN              | 0.79 | 3.57E-03 | 0.0151 |
| RWDD4            | 0.79 | 6.14E-03 | 0.0210 |
| HADHA            | 0.79 | 4.23E-03 | 0.0167 |
| PALB2            | 0.79 | 4.44E-03 | 0.0172 |
| MED26            | 0.79 | 1.72E-02 | 0.0412 |
| PRMT6            | 0.79 | 5.82E-03 | 0.0203 |
| EGLN1            | 0.79 | 6.73E-03 | 0.0223 |
| NELFB            | 0.79 | 4.09E-03 | 0.0164 |
| THAP12           | 0.79 | 6.30E-03 | 0.0213 |
| RBMXL1           | 0.79 | 9.10E-03 | 0.0268 |
| L2HGDH           | 0.78 | 1.95E-02 | 0.0452 |
| ERG28            | 0.78 | 2.07E-02 | 0.0474 |
| SUB1             | 0.78 | 3.57E-03 | 0.0151 |
| ADAM8            | 0.78 | 6.82E-03 | 0.0224 |
| MTF2             | 0.78 | 4.25E-03 | 0.0168 |
| WDYHV1           | 0.78 | 1.04E-02 | 0.0293 |
| TATDN1           | 0.78 | 7.20E-03 | 0.0231 |
| CHMP4B           | 0.78 | 1.38E-02 | 0.0355 |
| SCO1             | 0.78 | 3.77E-03 | 0.0156 |
| TMED2            | 0.78 | 1.53E-02 | 0.0382 |
| MECR             | 0.78 | 1.11E-02 | 0.0308 |
| DYRK4            | 0.78 | 9.56E-03 | 0.0277 |
| PRXL2C           | 0.78 | 8.86E-03 | 0.0264 |
| RRP36            | 0.78 | 7.71E-03 | 0.0242 |

|                  |      |          |        |
|------------------|------|----------|--------|
| MICU1            | 0.78 | 5.55E-03 | 0.0197 |
| AC012314.13      | 0.78 | 6.34E-03 | 0.0214 |
| AC012314.22      | 0.78 | 6.34E-03 | 0.0214 |
| AC012314.24      | 0.78 | 6.34E-03 | 0.0214 |
| AC012314.3       | 0.78 | 6.34E-03 | 0.0214 |
| AC012314.30      | 0.78 | 6.34E-03 | 0.0214 |
| AC012314.7       | 0.78 | 6.34E-03 | 0.0214 |
| GLUD1            | 0.78 | 1.33E-02 | 0.0345 |
| ABHD11           | 0.78 | 1.46E-02 | 0.0368 |
| ASMTL            | 0.78 | 1.59E-02 | 0.0392 |
| NGDN             | 0.78 | 1.03E-02 | 0.0292 |
| ENST000003552720 | 0.78 | 4.35E-03 | 0.0170 |
| E2F4             | 0.78 | 4.42E-03 | 0.0172 |
| SFPQ             | 0.78 | 5.86E-03 | 0.0204 |
| MINOS1           | 0.78 | 4.51E-03 | 0.0174 |
| PLEKHJ1          | 0.78 | 7.60E-03 | 0.0239 |
| CTPS2            | 0.78 | 8.72E-03 | 0.0262 |
| ZFP91            | 0.78 | 7.33E-03 | 0.0234 |
| PACSIN2          | 0.78 | 1.47E-02 | 0.0370 |
| EIF2S3           | 0.78 | 6.19E-03 | 0.0211 |
| MAP9             | 0.78 | 2.04E-02 | 0.0468 |
| B3GNT2           | 0.78 | 1.55E-02 | 0.0385 |
| CDK5             | 0.77 | 1.78E-02 | 0.0425 |
| PPP1R8           | 0.77 | 4.64E-03 | 0.0177 |
| ARL6IP6          | 0.77 | 4.49E-03 | 0.0173 |
| ENST000002027733 | 0.77 | 3.97E-03 | 0.0161 |
| ARFIP2           | 0.77 | 5.73E-03 | 0.0201 |
| GNAI3            | 0.77 | 5.29E-03 | 0.0191 |
| EIF2B1           | 0.77 | 3.93E-03 | 0.0160 |
| LRRC8B           | 0.77 | 7.20E-03 | 0.0231 |
| ENST000002650692 | 0.77 | 3.73E-03 | 0.0155 |
| NDUFV1           | 0.77 | 6.64E-03 | 0.0221 |
| INTS13           | 0.77 | 1.14E-02 | 0.0312 |
| ZNF106           | 0.77 | 4.93E-03 | 0.0183 |
| SLC2A1           | 0.77 | 1.55E-02 | 0.0384 |
| EIF2B5           | 0.77 | 4.37E-03 | 0.0171 |
| THAP4            | 0.77 | 7.62E-03 | 0.0240 |
| ATF1             | 0.77 | 5.30E-03 | 0.0191 |
| RPS27L           | 0.77 | 6.07E-03 | 0.0208 |
| NOL11            | 0.77 | 5.92E-03 | 0.0205 |
| RPL21            | 0.77 | 9.81E-03 | 0.0282 |
| KIF1BP           | 0.77 | 5.51E-03 | 0.0196 |
| ZSCAN5A          | 0.77 | 1.17E-02 | 0.0317 |
| APLP2            | 0.77 | 1.41E-02 | 0.0360 |
| ALKBH8           | 0.77 | 1.80E-02 | 0.0428 |
| CRY1             | 0.77 | 1.62E-02 | 0.0396 |
| TUBGCP4          | 0.77 | 9.75E-03 | 0.0281 |
| MTMR4            | 0.77 | 7.05E-03 | 0.0229 |
| ADCK2            | 0.77 | 8.21E-03 | 0.0252 |
| ASNSD1           | 0.77 | 8.52E-03 | 0.0258 |

|                  |      |          |        |
|------------------|------|----------|--------|
| RPP40            | 0.77 | 1.97E-02 | 0.0456 |
| PRKAR1A          | 0.77 | 1.74E-02 | 0.0418 |
| C1orf122         | 0.77 | 1.91E-02 | 0.0446 |
| GMDS             | 0.77 | 1.70E-02 | 0.0411 |
| ERGIC2           | 0.77 | 5.35E-03 | 0.0192 |
| SLC39A6          | 0.77 | 7.82E-03 | 0.0244 |
| TAF2             | 0.76 | 8.25E-03 | 0.0253 |
| CEP85            | 0.76 | 4.36E-03 | 0.0170 |
| STK26            | 0.76 | 4.29E-03 | 0.0169 |
| CMC2             | 0.76 | 3.96E-03 | 0.0161 |
| SNRNP200         | 0.76 | 4.66E-03 | 0.0177 |
| ENST000003237010 | 0.76 | 5.50E-03 | 0.0196 |
| ENST000003268731 | 0.76 | 7.41E-03 | 0.0235 |
| SMC5             | 0.76 | 6.27E-03 | 0.0212 |
| THAP3            | 0.76 | 1.92E-02 | 0.0448 |
| RPL5             | 0.76 | 5.73E-03 | 0.0201 |
| ENST000002792300 | 0.76 | 1.34E-02 | 0.0347 |
| CCNT1            | 0.76 | 4.94E-03 | 0.0183 |
| BRCC3            | 0.76 | 1.64E-02 | 0.0400 |
| COX6B1           | 0.76 | 5.81E-03 | 0.0203 |
| UNC119B          | 0.76 | 5.87E-03 | 0.0204 |
| AC006333.2       | 0.76 | 1.92E-02 | 0.0448 |
| UBAC1            | 0.76 | 1.13E-02 | 0.0310 |
| AGMAT            | 0.76 | 8.97E-03 | 0.0266 |
| FAM49B           | 0.75 | 4.43E-03 | 0.0172 |
| ADIPOR1          | 0.75 | 1.58E-02 | 0.0391 |
| DHRS13           | 0.75 | 1.98E-02 | 0.0458 |
| CEP97            | 0.75 | 1.23E-02 | 0.0327 |
| STX6             | 0.75 | 6.30E-03 | 0.0213 |
| CCT2             | 0.75 | 2.14E-02 | 0.0484 |
| OST4             | 0.75 | 8.74E-03 | 0.0262 |
| TRMT11           | 0.75 | 1.44E-02 | 0.0365 |
| CEP76            | 0.75 | 8.49E-03 | 0.0257 |
| HIKESHI          | 0.75 | 4.21E-03 | 0.0167 |
| FCF1             | 0.75 | 9.97E-03 | 0.0285 |
| ENST000002284950 | 0.75 | 5.57E-03 | 0.0197 |
| COMMD5           | 0.75 | 9.16E-03 | 0.0270 |
| RPL7A            | 0.75 | 4.07E-03 | 0.0163 |
| BSG              | 0.75 | 6.27E-03 | 0.0212 |
| PNN              | 0.75 | 4.18E-03 | 0.0166 |
| COPB2            | 0.75 | 4.39E-03 | 0.0171 |
| IRAK2            | 0.75 | 1.37E-02 | 0.0353 |
| NUP50            | 0.75 | 4.67E-03 | 0.0178 |
| EIF3L            | 0.75 | 7.83E-03 | 0.0244 |
| EYA3             | 0.75 | 7.33E-03 | 0.0234 |
| RAB9A            | 0.75 | 9.30E-03 | 0.0272 |
| RPS24            | 0.75 | 4.68E-03 | 0.0178 |
| IMPA1            | 0.74 | 1.22E-02 | 0.0326 |
| CDC37            | 0.74 | 4.36E-03 | 0.0170 |
| CD2              | 0.74 | 5.24E-03 | 0.0190 |

|                  |      |          |        |
|------------------|------|----------|--------|
| RPL18A           | 0.74 | 7.43E-03 | 0.0236 |
| PAFAH1B2         | 0.74 | 7.62E-03 | 0.0240 |
| ENST000003557650 | 0.74 | 5.43E-03 | 0.0194 |
| SS18L2           | 0.74 | 1.26E-02 | 0.0333 |
| OAT              | 0.74 | 6.04E-03 | 0.0208 |
| ISY1             | 0.74 | 5.05E-03 | 0.0186 |
| RMDN1            | 0.74 | 4.50E-03 | 0.0174 |
| STK16            | 0.74 | 9.30E-03 | 0.0272 |
| GMPS             | 0.74 | 4.95E-03 | 0.0183 |
| HNRNPU           | 0.74 | 4.55E-03 | 0.0175 |
| C11orf58         | 0.74 | 5.62E-03 | 0.0198 |
| CENPB            | 0.74 | 1.12E-02 | 0.0309 |
| CNOT10           | 0.74 | 1.13E-02 | 0.0310 |
| PAAF1            | 0.74 | 1.24E-02 | 0.0330 |
| PPP2R1B          | 0.74 | 1.10E-02 | 0.0304 |
| ATP6V1B2         | 0.74 | 5.74E-03 | 0.0201 |
| DPH3             | 0.74 | 6.78E-03 | 0.0224 |
| STK24            | 0.74 | 4.62E-03 | 0.0176 |
| VEZT             | 0.74 | 5.06E-03 | 0.0186 |
| USP16            | 0.74 | 1.13E-02 | 0.0311 |
| ENST000002164421 | 0.74 | 6.76E-03 | 0.0223 |
| DMWD             | 0.74 | 2.17E-02 | 0.0490 |
| FDXACB1          | 0.74 | 2.10E-02 | 0.0479 |
| MED7             | 0.74 | 5.16E-03 | 0.0188 |
| KCNAB2           | 0.74 | 4.43E-03 | 0.0172 |
| YKT6             | 0.73 | 7.24E-03 | 0.0232 |
| ABHD15           | 0.73 | 8.75E-03 | 0.0262 |
| COMT             | 0.73 | 8.26E-03 | 0.0253 |
| OXSM             | 0.73 | 1.83E-02 | 0.0433 |
| ENST000002665083 | 0.73 | 1.82E-02 | 0.0430 |
| SLC35G1          | 0.73 | 1.42E-02 | 0.0362 |
| RPS6             | 0.73 | 4.24E-03 | 0.0167 |
| DHX38            | 0.73 | 7.04E-03 | 0.0229 |
| PRIMPOL          | 0.73 | 2.19E-02 | 0.0493 |
| NDUFB2           | 0.73 | 6.49E-03 | 0.0217 |
| NAP1L1           | 0.73 | 5.27E-03 | 0.0190 |
| C1orf216         | 0.73 | 8.20E-03 | 0.0252 |
| SLC41A1          | 0.73 | 1.35E-02 | 0.0349 |
| DBR1             | 0.73 | 5.12E-03 | 0.0187 |
| RPL36            | 0.73 | 6.20E-03 | 0.0211 |
| PEX5             | 0.73 | 9.67E-03 | 0.0279 |
| POLR3F           | 0.73 | 1.91E-02 | 0.0446 |
| IFT22            | 0.73 | 1.22E-02 | 0.0326 |
| RSRC1            | 0.73 | 4.77E-03 | 0.0180 |
| RPL24            | 0.73 | 5.51E-03 | 0.0196 |
| RPL22P1          | 0.73 | 8.09E-03 | 0.0250 |
| CEP44            | 0.73 | 5.52E-03 | 0.0196 |
| MED18            | 0.72 | 7.11E-03 | 0.0230 |
| TUBGCP3          | 0.72 | 9.98E-03 | 0.0285 |
| SENP1            | 0.72 | 6.88E-03 | 0.0226 |

|                  |      |          |        |
|------------------|------|----------|--------|
| ZCCHC9           | 0.72 | 4.76E-03 | 0.0180 |
| AC091959.3       | 0.72 | 8.87E-03 | 0.0264 |
| MIOS             | 0.72 | 8.65E-03 | 0.0260 |
| SLC25A36         | 0.72 | 5.77E-03 | 0.0202 |
| SRSF2            | 0.72 | 8.93E-03 | 0.0265 |
| RTRAF            | 0.72 | 4.90E-03 | 0.0182 |
| CNIH4            | 0.72 | 5.04E-03 | 0.0186 |
| ENST000002633841 | 0.72 | 1.27E-02 | 0.0336 |
| PRPSAP2          | 0.72 | 5.51E-03 | 0.0196 |
| PMS1             | 0.72 | 5.74E-03 | 0.0201 |
| NFATC1           | 0.72 | 1.69E-02 | 0.0408 |
| CSTF3            | 0.72 | 5.54E-03 | 0.0196 |
| DIS3             | 0.72 | 4.95E-03 | 0.0184 |
| COIL             | 0.72 | 6.87E-03 | 0.0226 |
| MTREX            | 0.72 | 6.99E-03 | 0.0228 |
| TNIP2            | 0.72 | 9.40E-03 | 0.0274 |
| MAP4K3-DT        | 0.72 | 2.03E-02 | 0.0467 |
| SFR1             | 0.72 | 1.39E-02 | 0.0356 |
| ENST000003044141 | 0.72 | 7.22E-03 | 0.0232 |
| PRKAG1           | 0.72 | 1.03E-02 | 0.0291 |
| ENST000003233450 | 0.72 | 4.93E-03 | 0.0183 |
| ATP5MG           | 0.72 | 4.77E-03 | 0.0180 |
| TXNDC9           | 0.72 | 5.27E-03 | 0.0191 |
| UBE2D2           | 0.72 | 7.02E-03 | 0.0228 |
| AGPS             | 0.72 | 5.27E-03 | 0.0190 |
| GFER             | 0.72 | 1.80E-02 | 0.0428 |
| ENST000002941890 | 0.72 | 8.23E-03 | 0.0252 |
| ECD              | 0.72 | 9.10E-03 | 0.0269 |
| KIF5B            | 0.72 | 6.66E-03 | 0.0221 |
| ACTR3            | 0.72 | 6.89E-03 | 0.0226 |
| FIG4             | 0.72 | 1.18E-02 | 0.0320 |
| ATP5MC2          | 0.72 | 7.86E-03 | 0.0245 |
| BCL9             | 0.72 | 1.12E-02 | 0.0309 |
| LRPPRC           | 0.72 | 1.43E-02 | 0.0364 |
| RNF6             | 0.72 | 1.43E-02 | 0.0364 |
| UCLH3            | 0.72 | 6.16E-03 | 0.0210 |
| SPICE1           | 0.72 | 5.15E-03 | 0.0188 |
| CXorf40B         | 0.72 | 1.86E-02 | 0.0438 |
| USP30            | 0.72 | 1.73E-02 | 0.0415 |
| CAMK2D           | 0.72 | 1.71E-02 | 0.0411 |
| MYEF2            | 0.72 | 1.37E-02 | 0.0352 |
| RBM7             | 0.72 | 7.73E-03 | 0.0242 |
| SLC15A4          | 0.72 | 1.33E-02 | 0.0346 |
| SPOUT1           | 0.71 | 1.93E-02 | 0.0450 |
| FOPNL            | 0.71 | 1.26E-02 | 0.0333 |
| FXR1             | 0.71 | 6.88E-03 | 0.0226 |
| MUM1             | 0.71 | 8.25E-03 | 0.0253 |
| CUL4A            | 0.71 | 9.78E-03 | 0.0282 |
| CEP78            | 0.71 | 5.10E-03 | 0.0187 |
| SMARCA5          | 0.71 | 5.25E-03 | 0.0190 |

|                  |      |          |        |
|------------------|------|----------|--------|
| ACER3            | 0.71 | 6.67E-03 | 0.0221 |
| TTI1             | 0.71 | 1.23E-02 | 0.0328 |
| CCAR1            | 0.71 | 6.53E-03 | 0.0218 |
| ELL              | 0.71 | 1.10E-02 | 0.0304 |
| RPUSD4           | 0.71 | 5.45E-03 | 0.0195 |
| ZNRD1            | 0.71 | 1.74E-02 | 0.0418 |
| EIF4B            | 0.71 | 6.75E-03 | 0.0223 |
| TMEM14B          | 0.71 | 9.78E-03 | 0.0282 |
| SELENOH          | 0.71 | 6.86E-03 | 0.0225 |
| COPS5            | 0.71 | 1.26E-02 | 0.0333 |
| MAPK1IP1L        | 0.71 | 5.23E-03 | 0.0190 |
| IWS1             | 0.71 | 6.18E-03 | 0.0210 |
| SCARNA12         | 0.71 | 1.25E-02 | 0.0332 |
| JAGN1            | 0.71 | 1.88E-02 | 0.0441 |
| ENST000003049920 | 0.71 | 7.20E-03 | 0.0231 |
| HDAC8            | 0.71 | 7.73E-03 | 0.0242 |
| ENST000002064510 | 0.71 | 1.38E-02 | 0.0355 |
| OSBPL3           | 0.71 | 1.13E-02 | 0.0311 |
| CASP6            | 0.71 | 1.03E-02 | 0.0291 |
| ILK              | 0.71 | 1.65E-02 | 0.0402 |
| KIF1B            | 0.71 | 6.94E-03 | 0.0227 |
| COX7A2L          | 0.71 | 5.23E-03 | 0.0190 |
| NUDT22           | 0.71 | 1.04E-02 | 0.0293 |
| AAGAB            | 0.71 | 1.01E-02 | 0.0288 |
| CEBPZ            | 0.71 | 6.15E-03 | 0.0210 |
| ENST000003140670 | 0.71 | 1.69E-02 | 0.0408 |
| KLF9             | 0.70 | 7.80E-03 | 0.0243 |
| COPS2            | 0.70 | 1.65E-02 | 0.0401 |
| PUS3             | 0.70 | 9.01E-03 | 0.0267 |
| NCOA3            | 0.70 | 5.43E-03 | 0.0194 |
| LARP1            | 0.70 | 9.67E-03 | 0.0279 |
| FUBP1            | 0.70 | 5.30E-03 | 0.0191 |
| PET117           | 0.70 | 8.69E-03 | 0.0261 |
| HENMT1           | 0.70 | 1.25E-02 | 0.0331 |
| DIABLO           | 0.70 | 6.70E-03 | 0.0222 |
| AKT2             | 0.70 | 9.88E-03 | 0.0284 |
| ITPR2            | 0.70 | 9.89E-03 | 0.0284 |
| BTBD6            | 0.70 | 1.05E-02 | 0.0294 |
| PPTC7            | 0.70 | 6.14E-03 | 0.0210 |
| ENST000002765202 | 0.70 | 8.85E-03 | 0.0264 |
| MZT2B            | 0.70 | 2.05E-02 | 0.0470 |
| SUCLG1           | 0.70 | 8.72E-03 | 0.0262 |
| SELENOT          | 0.70 | 6.02E-03 | 0.0207 |
| AUP1             | 0.70 | 2.19E-02 | 0.0492 |
| COASY            | 0.70 | 1.31E-02 | 0.0342 |
| EIF4G2           | 0.70 | 2.22E-02 | 0.0497 |
| NDUFA5           | 0.70 | 9.25E-03 | 0.0271 |
| PMPCB            | 0.70 | 5.83E-03 | 0.0203 |
| ST3GAL3          | 0.70 | 1.84E-02 | 0.0436 |
| TRIM65           | 0.69 | 1.58E-02 | 0.0391 |

|                  |      |          |        |
|------------------|------|----------|--------|
| FGFR10P          | 0.69 | 1.07E-02 | 0.0298 |
| TGDS             | 0.69 | 1.79E-02 | 0.0425 |
| AFTPH            | 0.69 | 8.16E-03 | 0.0251 |
| BAG2             | 0.69 | 8.43E-03 | 0.0256 |
| TANGO6           | 0.69 | 1.07E-02 | 0.0299 |
| ELOC             | 0.69 | 1.68E-02 | 0.0407 |
| MRPL2            | 0.69 | 1.91E-02 | 0.0446 |
| SENP2            | 0.69 | 1.54E-02 | 0.0383 |
| GRHPR            | 0.69 | 1.89E-02 | 0.0443 |
| RECQL            | 0.69 | 7.19E-03 | 0.0231 |
| MEMO1            | 0.69 | 7.36E-03 | 0.0234 |
| C22orf46         | 0.69 | 1.95E-02 | 0.0454 |
| BRK1             | 0.69 | 1.16E-02 | 0.0315 |
| UBE2F            | 0.69 | 1.27E-02 | 0.0334 |
| APIP             | 0.69 | 1.76E-02 | 0.0421 |
| ENST000003680260 | 0.69 | 1.68E-02 | 0.0407 |
| COX7C            | 0.69 | 7.38E-03 | 0.0235 |
| PLAA             | 0.69 | 8.45E-03 | 0.0256 |
| SC5D             | 0.69 | 7.50E-03 | 0.0237 |
| DNAJC7           | 0.69 | 1.35E-02 | 0.0349 |
| SIL1             | 0.69 | 1.56E-02 | 0.0387 |
| LRRFIP1          | 0.68 | 8.46E-03 | 0.0257 |
| ENST000002288251 | 0.68 | 6.64E-03 | 0.0221 |
| C11orf98         | 0.68 | 9.38E-03 | 0.0273 |
| PRDX6            | 0.68 | 1.16E-02 | 0.0316 |
| DHX16            | 0.68 | 6.44E-03 | 0.0216 |
| INPPL1           | 0.68 | 1.48E-02 | 0.0372 |
| FBXO4            | 0.68 | 1.69E-02 | 0.0408 |
| CUTC             | 0.68 | 8.84E-03 | 0.0264 |
| METTL15          | 0.68 | 1.33E-02 | 0.0345 |
| EDEM1            | 0.68 | 6.19E-03 | 0.0211 |
| TMED9            | 0.68 | 1.68E-02 | 0.0407 |
| ENST000003115021 | 0.68 | 9.25E-03 | 0.0271 |
| POLR2B           | 0.68 | 7.04E-03 | 0.0229 |
| GFPT1            | 0.68 | 2.07E-02 | 0.0473 |
| AGPAT3           | 0.68 | 1.25E-02 | 0.0332 |
| TAF1D            | 0.68 | 8.66E-03 | 0.0260 |
| SNAP47           | 0.68 | 8.18E-03 | 0.0251 |
| AATF             | 0.68 | 6.67E-03 | 0.0221 |
| COPE             | 0.68 | 7.32E-03 | 0.0234 |
| USP22            | 0.68 | 1.58E-02 | 0.0390 |
| RPS11            | 0.68 | 8.22E-03 | 0.0252 |
| SAMM50           | 0.68 | 7.40E-03 | 0.0235 |
| PLRG1            | 0.68 | 7.54E-03 | 0.0238 |
| ENST000003521711 | 0.68 | 9.62E-03 | 0.0278 |
| ZNF195           | 0.68 | 1.29E-02 | 0.0339 |
| ENST000002789030 | 0.67 | 1.20E-02 | 0.0324 |
| SMARCC1          | 0.67 | 7.00E-03 | 0.0228 |
| AMZ2             | 0.67 | 7.96E-03 | 0.0247 |
| ELOVL1           | 0.67 | 1.22E-02 | 0.0326 |

|                  |      |          |        |
|------------------|------|----------|--------|
| ERCC8            | 0.67 | 7.59E-03 | 0.0239 |
| TUSC2            | 0.67 | 1.31E-02 | 0.0342 |
| HNRNPD           | 0.67 | 9.31E-03 | 0.0272 |
| C8orf59          | 0.67 | 6.48E-03 | 0.0217 |
| LUC7L2           | 0.67 | 8.60E-03 | 0.0259 |
| BUB3             | 0.67 | 6.25E-03 | 0.0212 |
| NOP2             | 0.67 | 7.19E-03 | 0.0231 |
| ENST000000021650 | 0.67 | 1.54E-02 | 0.0383 |
| ATXN2L           | 0.67 | 9.72E-03 | 0.0281 |
| PDSS2            | 0.67 | 1.08E-02 | 0.0301 |
| PAIP2            | 0.67 | 1.62E-02 | 0.0396 |
| FERMT3           | 0.67 | 1.02E-02 | 0.0289 |
| NADK             | 0.67 | 1.59E-02 | 0.0392 |
| ETAA1            | 0.67 | 7.87E-03 | 0.0245 |
| AC091057.1       | 0.67 | 1.58E-02 | 0.0390 |
| PNRC2            | 0.67 | 7.14E-03 | 0.0230 |
| ABCD3            | 0.67 | 1.75E-02 | 0.0419 |
| CCDC12           | 0.67 | 1.34E-02 | 0.0348 |
| ING1             | 0.67 | 9.32E-03 | 0.0272 |
| ENST000001993890 | 0.67 | 1.12E-02 | 0.0308 |
| MRPS25           | 0.67 | 9.38E-03 | 0.0273 |
| CIAPIN1          | 0.66 | 8.16E-03 | 0.0251 |
| SVIP             | 0.66 | 7.70E-03 | 0.0242 |
| CCDC59           | 0.66 | 8.77E-03 | 0.0262 |
| PDIA3            | 0.66 | 1.99E-02 | 0.0459 |
| ENST000003409410 | 0.66 | 1.72E-02 | 0.0414 |
| ELAC2            | 0.66 | 7.42E-03 | 0.0236 |
| PLPBP            | 0.66 | 7.91E-03 | 0.0246 |
| JTB              | 0.66 | 1.08E-02 | 0.0301 |
| NDUFA10          | 0.66 | 7.18E-03 | 0.0231 |
| KRT10            | 0.66 | 1.39E-02 | 0.0356 |
| ENST000003370180 | 0.66 | 9.04E-03 | 0.0267 |
| ENST000003044340 | 0.66 | 1.14E-02 | 0.0313 |
| INTS11           | 0.66 | 1.16E-02 | 0.0316 |
| NDUFB9           | 0.66 | 7.99E-03 | 0.0247 |
| ENST000003129161 | 0.66 | 7.09E-03 | 0.0230 |
| ENST000003062701 | 0.66 | 1.39E-02 | 0.0356 |
| TSNAX            | 0.66 | 7.09E-03 | 0.0230 |
| APEH             | 0.66 | 1.18E-02 | 0.0320 |
| SLC25A12         | 0.66 | 2.12E-02 | 0.0481 |
| ANAPC15          | 0.66 | 1.62E-02 | 0.0397 |
| PANK3            | 0.65 | 1.09E-02 | 0.0303 |
| GTF2F1           | 0.65 | 1.59E-02 | 0.0392 |
| NSFL1C           | 0.65 | 8.29E-03 | 0.0253 |
| CRKL             | 0.65 | 9.61E-03 | 0.0278 |
| GAN              | 0.65 | 7.12E-03 | 0.0230 |
| PI4K2A           | 0.65 | 1.15E-02 | 0.0314 |
| ANXA7            | 0.65 | 8.41E-03 | 0.0256 |
| MEPCE            | 0.65 | 1.13E-02 | 0.0310 |
| 37500            | 0.65 | 1.42E-02 | 0.0362 |

|                  |      |          |        |
|------------------|------|----------|--------|
| MIS18BP1         | 0.65 | 1.48E-02 | 0.0371 |
| RAB5A            | 0.65 | 1.71E-02 | 0.0412 |
| SEPHS2           | 0.65 | 8.82E-03 | 0.0263 |
| LRIG1            | 0.65 | 8.99E-03 | 0.0266 |
| ZMAT2            | 0.65 | 1.15E-02 | 0.0314 |
| ADIPOR2          | 0.65 | 8.09E-03 | 0.0250 |
| LRRC47           | 0.65 | 2.22E-02 | 0.0497 |
| PRRC2A           | 0.65 | 1.35E-02 | 0.0350 |
| RPA2             | 0.65 | 7.86E-03 | 0.0245 |
| RNFT2            | 0.65 | 2.04E-02 | 0.0468 |
| SNHG20           | 0.65 | 1.51E-02 | 0.0377 |
| WDCP             | 0.64 | 9.95E-03 | 0.0285 |
| ANAPC7           | 0.64 | 1.14E-02 | 0.0313 |
| ZNF273           | 0.64 | 9.13E-03 | 0.0269 |
| FEM1A            | 0.64 | 1.83E-02 | 0.0434 |
| AC012360.3       | 0.64 | 1.73E-02 | 0.0415 |
| ALG9             | 0.64 | 9.09E-03 | 0.0268 |
| PDK1             | 0.64 | 1.09E-02 | 0.0302 |
| MAGT1            | 0.64 | 1.41E-02 | 0.0360 |
| ZNF85            | 0.64 | 1.09E-02 | 0.0303 |
| MRPL53           | 0.64 | 1.46E-02 | 0.0369 |
| REXO2            | 0.64 | 1.88E-02 | 0.0441 |
| GID8             | 0.64 | 7.54E-03 | 0.0238 |
| MIS12            | 0.64 | 1.09E-02 | 0.0303 |
| PREB             | 0.64 | 1.56E-02 | 0.0387 |
| BBS7             | 0.64 | 1.53E-02 | 0.0382 |
| RNF141           | 0.64 | 1.63E-02 | 0.0399 |
| CNOT6            | 0.64 | 8.36E-03 | 0.0255 |
| SERF2            | 0.64 | 7.96E-03 | 0.0247 |
| TSR2             | 0.64 | 1.38E-02 | 0.0355 |
| FAS              | 0.63 | 1.17E-02 | 0.0317 |
| RPL41            | 0.63 | 1.61E-02 | 0.0396 |
| ZBTB80S          | 0.63 | 1.19E-02 | 0.0322 |
| ENST000003450460 | 0.63 | 2.03E-02 | 0.0466 |
| METTL9           | 0.63 | 1.10E-02 | 0.0305 |
| WDR77            | 0.63 | 1.24E-02 | 0.0329 |
| H2AFY            | 0.63 | 8.06E-03 | 0.0249 |
| CFAP97           | 0.63 | 1.82E-02 | 0.0430 |
| RPS13            | 0.63 | 1.42E-02 | 0.0362 |
| ZNF212           | 0.63 | 2.09E-02 | 0.0477 |
| SEPT7            | 0.63 | 1.30E-02 | 0.0340 |
| CHD4             | 0.63 | 1.29E-02 | 0.0339 |
| CSK              | 0.63 | 1.10E-02 | 0.0305 |
| PDCD6            | 0.63 | 1.15E-02 | 0.0313 |
| RPL23            | 0.63 | 8.27E-03 | 0.0253 |
| CELF1            | 0.63 | 1.14E-02 | 0.0311 |
| RNMT             | 0.63 | 1.08E-02 | 0.0301 |
| C12orf4          | 0.63 | 1.29E-02 | 0.0339 |
| FLII             | 0.63 | 1.25E-02 | 0.0332 |
| RPL36A           | 0.62 | 8.62E-03 | 0.0259 |

|                  |      |          |        |
|------------------|------|----------|--------|
| ENST000003814010 | 0.62 | 1.35E-02 | 0.0350 |
| NSL1             | 0.62 | 1.42E-02 | 0.0363 |
| RPS5             | 0.62 | 1.32E-02 | 0.0345 |
| IMMP2L           | 0.62 | 1.69E-02 | 0.0409 |
| SLC25A25         | 0.62 | 1.53E-02 | 0.0381 |
| ENST000003006510 | 0.62 | 1.02E-02 | 0.0288 |
| FAM156A          | 0.62 | 1.14E-02 | 0.0311 |
| ERLIN2           | 0.62 | 1.36E-02 | 0.0352 |
| PCID2            | 0.62 | 1.30E-02 | 0.0341 |
| ZNF770           | 0.62 | 1.10E-02 | 0.0304 |
| TRIM28           | 0.62 | 1.87E-02 | 0.0440 |
| ENST000003146160 | 0.62 | 9.28E-03 | 0.0272 |
| ARL4A            | 0.62 | 1.53E-02 | 0.0381 |
| NF2              | 0.62 | 9.31E-03 | 0.0272 |
| TCAF1            | 0.62 | 1.26E-02 | 0.0334 |
| COX18            | 0.62 | 1.00E-02 | 0.0286 |
| TCTN3            | 0.62 | 1.68E-02 | 0.0407 |
| ENST000003249321 | 0.62 | 8.94E-03 | 0.0266 |
| RBM28            | 0.62 | 9.65E-03 | 0.0279 |
| HACD3            | 0.61 | 1.34E-02 | 0.0347 |
| MATR3            | 0.61 | 1.08E-02 | 0.0301 |
| ZNF267           | 0.61 | 1.65E-02 | 0.0402 |
| SLC30A5          | 0.61 | 1.40E-02 | 0.0358 |
| AGO2             | 0.61 | 1.07E-02 | 0.0299 |
| HADHB            | 0.61 | 1.00E-02 | 0.0286 |
| COPB1            | 0.61 | 1.17E-02 | 0.0318 |
| ZCCHC10          | 0.61 | 1.04E-02 | 0.0294 |
| ECI1             | 0.61 | 1.38E-02 | 0.0354 |
| SPPL2A           | 0.61 | 1.82E-02 | 0.0430 |
| CNOT7            | 0.61 | 1.42E-02 | 0.0363 |
| SACS             | 0.61 | 2.07E-02 | 0.0473 |
| RBCK1            | 0.61 | 1.49E-02 | 0.0373 |
| SKP1             | 0.61 | 9.84E-03 | 0.0283 |
| ENST000002588862 | 0.61 | 1.50E-02 | 0.0376 |
| NSUN5            | 0.61 | 1.71E-02 | 0.0412 |
| PEX2             | 0.61 | 9.26E-03 | 0.0271 |
| NUP85            | 0.61 | 1.14E-02 | 0.0312 |
| NDUFAF4          | 0.61 | 1.69E-02 | 0.0408 |
| ARL5B            | 0.61 | 1.07E-02 | 0.0300 |
| TEX2             | 0.61 | 1.12E-02 | 0.0309 |
| TRA2B            | 0.61 | 1.89E-02 | 0.0443 |
| SETD7            | 0.61 | 1.28E-02 | 0.0337 |
| GUF1             | 0.61 | 1.70E-02 | 0.0410 |
| LYRM1            | 0.60 | 1.08E-02 | 0.0301 |
| IFI16            | 0.60 | 1.33E-02 | 0.0345 |
| ENST000002634610 | 0.60 | 2.00E-02 | 0.0462 |
| AC026464.4       | 0.60 | 2.05E-02 | 0.0470 |
| IL23A            | 0.60 | 1.48E-02 | 0.0372 |
| SH3GL1           | 0.60 | 1.73E-02 | 0.0414 |
| SMIM12           | 0.60 | 2.05E-02 | 0.0470 |

|                  |      |          |        |
|------------------|------|----------|--------|
| RIOK3            | 0.60 | 1.13E-02 | 0.0310 |
| VKORC1L1         | 0.60 | 1.21E-02 | 0.0325 |
| FKTN             | 0.60 | 1.33E-02 | 0.0345 |
| CHTF8            | 0.60 | 9.72E-03 | 0.0281 |
| NDUFB5           | 0.60 | 1.20E-02 | 0.0323 |
| KLHL18           | 0.60 | 1.58E-02 | 0.0390 |
| ANAPC16          | 0.60 | 9.69E-03 | 0.0280 |
| TFG              | 0.60 | 1.67E-02 | 0.0405 |
| MOB1A            | 0.60 | 1.23E-02 | 0.0328 |
| TSG101           | 0.60 | 2.20E-02 | 0.0494 |
| DNAJB6           | 0.60 | 1.46E-02 | 0.0369 |
| FAM168B          | 0.60 | 1.29E-02 | 0.0338 |
| DNAJC14          | 0.59 | 1.08E-02 | 0.0302 |
| OTUD5            | 0.59 | 1.29E-02 | 0.0338 |
| SETD3            | 0.59 | 1.15E-02 | 0.0313 |
| STAU1            | 0.59 | 1.15E-02 | 0.0314 |
| MPC2             | 0.59 | 2.14E-02 | 0.0484 |
| TMEM173          | 0.59 | 1.08E-02 | 0.0302 |
| TARDBP           | 0.59 | 1.44E-02 | 0.0365 |
| ACBD6            | 0.59 | 1.05E-02 | 0.0296 |
| YME1L1           | 0.59 | 1.55E-02 | 0.0385 |
| ENST000002546301 | 0.59 | 1.65E-02 | 0.0401 |
| UBE2V1           | 0.59 | 1.69E-02 | 0.0408 |
| KPNA6            | 0.59 | 1.31E-02 | 0.0342 |
| BAZ1A            | 0.59 | 1.17E-02 | 0.0318 |
| MAP2K2           | 0.59 | 1.23E-02 | 0.0328 |
| AASDHPPT         | 0.59 | 1.43E-02 | 0.0364 |
| CFLAR            | 0.59 | 1.45E-02 | 0.0367 |
| SPAG7            | 0.58 | 1.23E-02 | 0.0328 |
| RTF2             | 0.58 | 1.12E-02 | 0.0308 |
| RLF              | 0.58 | 1.11E-02 | 0.0306 |
| PIGX             | 0.58 | 1.17E-02 | 0.0317 |
| ZNF410           | 0.58 | 1.67E-02 | 0.0406 |
| EDF1             | 0.58 | 1.39E-02 | 0.0357 |
| CSDE1            | 0.58 | 1.50E-02 | 0.0376 |
| YTHDF2           | 0.58 | 1.33E-02 | 0.0345 |
| KATNBL1          | 0.58 | 1.12E-02 | 0.0309 |
| SLC39A7          | 0.58 | 1.57E-02 | 0.0388 |
| TMEM183A         | 0.58 | 1.28E-02 | 0.0337 |
| IGFBP4           | 0.58 | 1.95E-02 | 0.0454 |
| TBK1             | 0.58 | 1.21E-02 | 0.0324 |
| GTF3C2           | 0.58 | 1.73E-02 | 0.0414 |
| ZFYVE9           | 0.58 | 1.90E-02 | 0.0444 |
| TMED4            | 0.58 | 1.45E-02 | 0.0368 |
| CFDP1            | 0.58 | 1.25E-02 | 0.0331 |
| SLF1             | 0.58 | 1.18E-02 | 0.0320 |
| SNX17            | 0.58 | 1.71E-02 | 0.0411 |
| CDK9             | 0.58 | 1.31E-02 | 0.0341 |
| SRGAP2B          | 0.58 | 1.50E-02 | 0.0376 |
| SLC35E1          | 0.57 | 1.46E-02 | 0.0368 |

|                  |      |          |        |
|------------------|------|----------|--------|
| TMBIM6           | 0.57 | 1.69E-02 | 0.0408 |
| BRD7             | 0.57 | 1.38E-02 | 0.0354 |
| TADA2A           | 0.57 | 1.53E-02 | 0.0380 |
| GTF2A1           | 0.57 | 1.37E-02 | 0.0353 |
| SPG21            | 0.57 | 1.24E-02 | 0.0329 |
| B3GAT3           | 0.57 | 2.22E-02 | 0.0497 |
| CDC5L            | 0.57 | 2.10E-02 | 0.0479 |
| MFSD14A          | 0.57 | 1.53E-02 | 0.0382 |
| INTS9            | 0.57 | 1.89E-02 | 0.0443 |
| DDX27            | 0.57 | 1.52E-02 | 0.0380 |
| ENST000002659860 | 0.57 | 1.62E-02 | 0.0396 |
| EEF1B2           | 0.57 | 1.86E-02 | 0.0438 |
| FAF2             | 0.57 | 1.25E-02 | 0.0331 |
| ENST000002226900 | 0.57 | 1.49E-02 | 0.0374 |
| RPS7             | 0.57 | 1.80E-02 | 0.0428 |
| AP3M1            | 0.57 | 1.42E-02 | 0.0362 |
| CBWD5            | 0.57 | 1.23E-02 | 0.0328 |
| PTCD3            | 0.57 | 2.02E-02 | 0.0465 |
| OSBPL9           | 0.56 | 1.21E-02 | 0.0325 |
| NMNAT1           | 0.56 | 2.04E-02 | 0.0468 |
| THAP1            | 0.56 | 1.50E-02 | 0.0376 |
| ENST000002617140 | 0.56 | 1.76E-02 | 0.0420 |
| OTUB1            | 0.56 | 1.56E-02 | 0.0386 |
| HMGN4            | 0.56 | 1.57E-02 | 0.0388 |
| CEBPG            | 0.56 | 1.55E-02 | 0.0384 |
| PDCD2            | 0.56 | 1.92E-02 | 0.0448 |
| HINT1            | 0.56 | 2.11E-02 | 0.0480 |
| ARL10            | 0.56 | 2.17E-02 | 0.0489 |
| FAF1             | 0.56 | 1.24E-02 | 0.0330 |
| RPL15            | 0.56 | 1.33E-02 | 0.0345 |
| NPEPPS           | 0.56 | 2.13E-02 | 0.0483 |
| ENST000002553050 | 0.56 | 1.29E-02 | 0.0338 |
| PSENN            | 0.56 | 1.74E-02 | 0.0417 |
| CS               | 0.56 | 1.70E-02 | 0.0410 |
| PITPNA           | 0.56 | 1.68E-02 | 0.0406 |
| SPCS2            | 0.55 | 2.21E-02 | 0.0496 |
| DYNC1LI1         | 0.55 | 1.71E-02 | 0.0411 |
| HMGXB3           | 0.55 | 1.51E-02 | 0.0378 |
| ENST000002569352 | 0.55 | 1.82E-02 | 0.0430 |
| AP4E1            | 0.55 | 1.59E-02 | 0.0392 |
| RIF1             | 0.55 | 1.92E-02 | 0.0449 |
| OSGIN2           | 0.55 | 1.54E-02 | 0.0382 |
| MEX3C            | 0.55 | 1.57E-02 | 0.0388 |
| GNE              | 0.55 | 1.46E-02 | 0.0368 |
| TNPO1            | 0.55 | 1.50E-02 | 0.0376 |
| RPF1             | 0.55 | 1.71E-02 | 0.0412 |
| TBCE             | 0.55 | 2.23E-02 | 0.0498 |
| BLOC1S5          | 0.55 | 1.36E-02 | 0.0351 |
| TRNAU1AP         | 0.55 | 1.58E-02 | 0.0389 |
| RPL12            | 0.55 | 1.34E-02 | 0.0348 |

|                  |       |          |        |
|------------------|-------|----------|--------|
| TRIOBP           | 0.55  | 2.22E-02 | 0.0498 |
| POLG             | 0.55  | 1.39E-02 | 0.0357 |
| SRFBP1           | 0.55  | 1.80E-02 | 0.0428 |
| LINC01215        | 0.55  | 1.62E-02 | 0.0397 |
| PCBP1            | 0.55  | 2.05E-02 | 0.0470 |
| MEAF6            | 0.55  | 1.87E-02 | 0.0441 |
| PPP6R3           | 0.54  | 1.69E-02 | 0.0409 |
| FAM98B           | 0.54  | 1.99E-02 | 0.0459 |
| PRPF38A          | 0.54  | 1.45E-02 | 0.0367 |
| MANEA            | 0.54  | 2.17E-02 | 0.0489 |
| PPP1CB           | 0.54  | 1.82E-02 | 0.0432 |
| DCTN2            | 0.54  | 1.57E-02 | 0.0388 |
| GATC             | 0.54  | 1.73E-02 | 0.0416 |
| ENST000002864481 | 0.54  | 2.19E-02 | 0.0493 |
| UBE3A            | 0.54  | 1.60E-02 | 0.0393 |
| TNFAIP1          | 0.53  | 2.23E-02 | 0.0498 |
| C8orf76          | 0.53  | 2.16E-02 | 0.0489 |
| UBE2Q1           | 0.53  | 1.66E-02 | 0.0403 |
| LIAS             | 0.53  | 2.06E-02 | 0.0471 |
| RSRC2            | 0.53  | 2.20E-02 | 0.0494 |
| CDK5RAP2         | 0.52  | 1.67E-02 | 0.0405 |
| CWF19L1          | 0.52  | 1.57E-02 | 0.0389 |
| ABT1             | 0.52  | 1.99E-02 | 0.0459 |
| ATF2             | 0.52  | 1.68E-02 | 0.0407 |
| ENST000002196891 | 0.52  | 2.19E-02 | 0.0492 |
| TRAPPC2L         | 0.52  | 1.92E-02 | 0.0448 |
| CD2AP            | 0.52  | 1.60E-02 | 0.0393 |
| ENST000003358952 | 0.52  | 1.94E-02 | 0.0451 |
| UBTF             | 0.51  | 2.09E-02 | 0.0477 |
| MT-ND4L          | 0.51  | 2.19E-02 | 0.0493 |
| DCUN1D1          | 0.51  | 2.17E-02 | 0.0490 |
| DNAJC1           | 0.51  | 1.77E-02 | 0.0422 |
| DYNLL2           | 0.51  | 1.92E-02 | 0.0448 |
| ATG4C            | 0.51  | 1.79E-02 | 0.0426 |
| CDKN2D           | 0.51  | 1.96E-02 | 0.0455 |
| CDV3             | 0.51  | 1.75E-02 | 0.0418 |
| LTA4H            | 0.51  | 2.16E-02 | 0.0488 |
| HPS4             | 0.51  | 1.90E-02 | 0.0445 |
| TARBP1           | 0.51  | 1.98E-02 | 0.0459 |
| RAP1B            | 0.51  | 2.12E-02 | 0.0481 |
| UBA3             | 0.51  | 1.82E-02 | 0.0430 |
| CRCP             | 0.50  | 1.98E-02 | 0.0458 |
| ADSS             | 0.50  | 2.09E-02 | 0.0476 |
| OARD1            | 0.50  | 1.86E-02 | 0.0438 |
| ENST000002726383 | 0.49  | 2.15E-02 | 0.0486 |
| MRPL50           | 0.49  | 2.22E-02 | 0.0497 |
| RNGTT            | 0.48  | 2.04E-02 | 0.0468 |
| WDR55            | 0.48  | 2.15E-02 | 0.0486 |
| TRAPPC10         | -0.47 | 2.22E-02 | 0.0497 |
| UTP14C           | -0.48 | 2.19E-02 | 0.0493 |

|                  |       |          |        |
|------------------|-------|----------|--------|
| CCDC93           | -0.48 | 2.16E-02 | 0.0488 |
| APC              | -0.48 | 2.15E-02 | 0.0486 |
| IKZF1            | -0.48 | 1.99E-02 | 0.0460 |
| ORC4             | -0.49 | 2.03E-02 | 0.0467 |
| DCTN1            | -0.49 | 2.16E-02 | 0.0488 |
| DBNL             | -0.49 | 2.18E-02 | 0.0492 |
| MED23            | -0.49 | 2.01E-02 | 0.0462 |
| ZMYM5            | -0.50 | 2.23E-02 | 0.0499 |
| GOLGA4           | -0.50 | 2.10E-02 | 0.0478 |
| ZNF507           | -0.50 | 1.99E-02 | 0.0460 |
| ENST000003526890 | -0.50 | 2.04E-02 | 0.0468 |
| PIK3C3           | -0.51 | 2.06E-02 | 0.0472 |
| ANXA11           | -0.51 | 2.23E-02 | 0.0499 |
| VEZF1            | -0.51 | 2.20E-02 | 0.0494 |
| RSBN1L           | -0.51 | 2.22E-02 | 0.0497 |
| CHMP1B           | -0.51 | 1.96E-02 | 0.0455 |
| EBLN3P           | -0.51 | 1.71E-02 | 0.0412 |
| GOLGB1           | -0.51 | 2.12E-02 | 0.0481 |
| ENST000000525690 | -0.51 | 1.90E-02 | 0.0445 |
| HIPK3            | -0.52 | 1.97E-02 | 0.0457 |
| CCNDBP1          | -0.52 | 1.70E-02 | 0.0410 |
| NFATC3           | -0.52 | 2.18E-02 | 0.0491 |
| FAM217B          | -0.52 | 1.85E-02 | 0.0436 |
| EIF4EBP2         | -0.53 | 2.02E-02 | 0.0466 |
| CHD9             | -0.53 | 1.96E-02 | 0.0455 |
| ENST000003267930 | -0.53 | 1.61E-02 | 0.0395 |
| MFSD4B           | -0.53 | 1.93E-02 | 0.0450 |
| ATG16L2          | -0.53 | 1.97E-02 | 0.0456 |
| KMT2E            | -0.53 | 1.82E-02 | 0.0432 |
| TRBV7-2          | -0.53 | 1.97E-02 | 0.0456 |
| HEXA             | -0.54 | 1.55E-02 | 0.0384 |
| ZNF407           | -0.54 | 1.59E-02 | 0.0392 |
| SNX13            | -0.54 | 1.46E-02 | 0.0368 |
| GABARAP          | -0.54 | 2.22E-02 | 0.0498 |
| PAPOLA           | -0.54 | 1.40E-02 | 0.0358 |
| ENST000002630730 | -0.54 | 1.56E-02 | 0.0387 |
| KDM4C            | -0.54 | 1.73E-02 | 0.0416 |
| CEP85L           | -0.54 | 1.44E-02 | 0.0366 |
| PWWP2A           | -0.55 | 1.76E-02 | 0.0420 |
| IGBP1            | -0.55 | 2.12E-02 | 0.0481 |
| ANKHD1           | -0.55 | 1.52E-02 | 0.0379 |
| WASHC4           | -0.55 | 1.81E-02 | 0.0430 |
| MTO1             | -0.55 | 1.83E-02 | 0.0433 |
| EPM2AIP1         | -0.55 | 1.43E-02 | 0.0364 |
| SLC35A1          | -0.56 | 2.07E-02 | 0.0473 |
| CLN3             | -0.56 | 1.81E-02 | 0.0430 |
| PHF3             | -0.56 | 2.05E-02 | 0.0470 |
| PCYT1A           | -0.56 | 1.45E-02 | 0.0367 |
| SHC1             | -0.56 | 2.13E-02 | 0.0482 |
| TMEM59           | -0.56 | 1.70E-02 | 0.0409 |

|          |       |          |        |
|----------|-------|----------|--------|
| ZNF3     | -0.56 | 1.50E-02 | 0.0376 |
| VPS35L   | -0.56 | 1.94E-02 | 0.0452 |
| DUSP22   | -0.56 | 1.73E-02 | 0.0415 |
| NR2C1    | -0.57 | 1.48E-02 | 0.0372 |
| KDM2A    | -0.57 | 1.44E-02 | 0.0366 |
| SEL1L3   | -0.57 | 1.24E-02 | 0.0330 |
| CDK5RAP3 | -0.57 | 1.68E-02 | 0.0407 |
| MBNL3    | -0.57 | 1.57E-02 | 0.0389 |
| SUGT1    | -0.57 | 2.19E-02 | 0.0493 |
| MYSM1    | -0.57 | 1.32E-02 | 0.0343 |
| ZNF252P  | -0.57 | 1.20E-02 | 0.0323 |
| BRAF     | -0.57 | 1.21E-02 | 0.0325 |
| MIGA1    | -0.57 | 1.22E-02 | 0.0326 |
| ZSWIM6   | -0.57 | 2.04E-02 | 0.0468 |
| SLC20A2  | -0.57 | 1.74E-02 | 0.0418 |
| RBM41    | -0.58 | 1.22E-02 | 0.0327 |
| POGLUT1  | -0.58 | 2.13E-02 | 0.0484 |
| USP53    | -0.58 | 1.50E-02 | 0.0376 |
| XAB2     | -0.58 | 1.58E-02 | 0.0389 |
| TGOLN2   | -0.58 | 1.45E-02 | 0.0368 |
| SLC38A9  | -0.59 | 1.69E-02 | 0.0408 |
| MKRN1    | -0.59 | 1.45E-02 | 0.0367 |
| INTS8    | -0.59 | 2.18E-02 | 0.0491 |
| SUMF1    | -0.59 | 2.21E-02 | 0.0496 |
| PIP4K2A  | -0.59 | 1.82E-02 | 0.0432 |
| KMT5B    | -0.59 | 1.21E-02 | 0.0325 |
| MSL3     | -0.59 | 1.66E-02 | 0.0403 |
| NFX1     | -0.59 | 2.03E-02 | 0.0466 |
| RPS6KC1  | -0.59 | 1.34E-02 | 0.0347 |
| AGA      | -0.59 | 1.34E-02 | 0.0348 |
| LEMD3    | -0.59 | 1.53E-02 | 0.0381 |
| DMAP1    | -0.59 | 1.20E-02 | 0.0323 |
| CCDC142  | -0.60 | 1.92E-02 | 0.0448 |
| ILKAP    | -0.60 | 1.27E-02 | 0.0336 |
| ZNF780A  | -0.60 | 1.05E-02 | 0.0295 |
| SETX     | -0.60 | 1.00E-02 | 0.0286 |
| CCT6P3   | -0.60 | 2.13E-02 | 0.0484 |
| PAK2     | -0.60 | 1.63E-02 | 0.0397 |
| ZNF430   | -0.60 | 1.09E-02 | 0.0304 |
| CYHR1    | -0.60 | 2.05E-02 | 0.0470 |
| FMR1     | -0.60 | 1.79E-02 | 0.0426 |
| PIGG     | -0.60 | 1.11E-02 | 0.0306 |
| TMEM131  | -0.61 | 1.05E-02 | 0.0294 |
| SAFB2    | -0.61 | 1.87E-02 | 0.0439 |
| C9orf78  | -0.61 | 1.24E-02 | 0.0330 |
| ZNF32    | -0.61 | 1.38E-02 | 0.0355 |
| ZFAND6   | -0.61 | 9.99E-03 | 0.0286 |
| CNKSR2   | -0.61 | 1.30E-02 | 0.0341 |
| TAF1     | -0.61 | 9.69E-03 | 0.0280 |
| ABRAXAS1 | -0.61 | 1.84E-02 | 0.0436 |

|                  |       |          |        |
|------------------|-------|----------|--------|
| AP001486.2       | -0.61 | 1.91E-02 | 0.0446 |
| GABPB1-AS1       | -0.61 | 1.92E-02 | 0.0448 |
| ATXN1L           | -0.61 | 9.82E-03 | 0.0283 |
| PRKCQ            | -0.61 | 1.31E-02 | 0.0343 |
| CEP104           | -0.62 | 1.22E-02 | 0.0326 |
| C18orf32         | -0.62 | 1.62E-02 | 0.0397 |
| TARSL2           | -0.62 | 1.89E-02 | 0.0443 |
| WDR19            | -0.62 | 1.89E-02 | 0.0442 |
| L3MBTL1          | -0.62 | 2.07E-02 | 0.0474 |
| SPG7             | -0.62 | 1.52E-02 | 0.0378 |
| ACAP3            | -0.62 | 1.47E-02 | 0.0371 |
| ESYT1            | -0.62 | 1.63E-02 | 0.0397 |
| TBCD             | -0.62 | 1.09E-02 | 0.0303 |
| TRIM35           | -0.62 | 1.02E-02 | 0.0290 |
| ENST000003079681 | -0.62 | 1.29E-02 | 0.0339 |
| SP110            | -0.62 | 1.38E-02 | 0.0356 |
| MORN3            | -0.62 | 2.17E-02 | 0.0489 |
| RNF2             | -0.62 | 1.25E-02 | 0.0332 |
| ATG14            | -0.62 | 1.45E-02 | 0.0367 |
| ZNF217           | -0.62 | 1.38E-02 | 0.0355 |
| GBA2             | -0.63 | 1.14E-02 | 0.0311 |
| C1QTNF6          | -0.63 | 1.85E-02 | 0.0436 |
| RALGAPB          | -0.63 | 9.37E-03 | 0.0273 |
| GIT2             | -0.63 | 8.77E-03 | 0.0262 |
| SMARCC2          | -0.63 | 1.12E-02 | 0.0309 |
| EP400            | -0.63 | 1.11E-02 | 0.0306 |
| HERC4            | -0.63 | 1.02E-02 | 0.0289 |
| SERINC3          | -0.63 | 8.58E-03 | 0.0259 |
| DCK              | -0.63 | 1.79E-02 | 0.0425 |
| EHMT1            | -0.63 | 1.02E-02 | 0.0288 |
| SH3GLB1          | -0.63 | 1.27E-02 | 0.0335 |
| PPWD1            | -0.63 | 8.80E-03 | 0.0263 |
| MORC4            | -0.63 | 7.97E-03 | 0.0247 |
| PDCD6IP          | -0.63 | 1.19E-02 | 0.0322 |
| ULK3             | -0.63 | 1.77E-02 | 0.0422 |
| ZNF468           | -0.64 | 1.03E-02 | 0.0292 |
| SLC33A1          | -0.64 | 1.06E-02 | 0.0297 |
| MDM4             | -0.64 | 9.17E-03 | 0.0270 |
| CHD2             | -0.64 | 9.16E-03 | 0.0269 |
| KDM5A            | -0.64 | 7.69E-03 | 0.0241 |
| DIAPH1           | -0.64 | 1.72E-02 | 0.0412 |
| UBAC2            | -0.64 | 1.23E-02 | 0.0329 |
| UBE2H            | -0.64 | 9.46E-03 | 0.0275 |
| MINDY3           | -0.64 | 1.61E-02 | 0.0395 |
| DET1             | -0.64 | 2.21E-02 | 0.0496 |
| ANKRD36C         | -0.64 | 8.31E-03 | 0.0254 |
| ZNF254           | -0.64 | 1.79E-02 | 0.0426 |
| SLC35E3          | -0.64 | 8.16E-03 | 0.0251 |
| SHPRH            | -0.64 | 8.72E-03 | 0.0262 |
| NUTM2A-AS1       | -0.64 | 2.22E-02 | 0.0498 |

|                  |       |          |        |
|------------------|-------|----------|--------|
| ZNF567           | -0.64 | 8.57E-03 | 0.0259 |
| C6orf89          | -0.64 | 1.30E-02 | 0.0340 |
| ENST000002933730 | -0.64 | 1.01E-02 | 0.0288 |
| MOAP1            | -0.64 | 1.32E-02 | 0.0343 |
| ERAP1            | -0.64 | 1.99E-02 | 0.0460 |
| THBS3            | -0.64 | 1.73E-02 | 0.0415 |
| MRTFB            | -0.64 | 1.51E-02 | 0.0377 |
| NISCH            | -0.64 | 1.62E-02 | 0.0397 |
| KIFAP3           | -0.64 | 1.01E-02 | 0.0288 |
| ZNF527           | -0.64 | 1.14E-02 | 0.0313 |
| FOXJ3            | -0.65 | 9.24E-03 | 0.0271 |
| MRFAP1L1         | -0.65 | 1.40E-02 | 0.0359 |
| VPS18            | -0.65 | 1.17E-02 | 0.0318 |
| TAB2             | -0.65 | 1.36E-02 | 0.0352 |
| GABPB2           | -0.65 | 7.51E-03 | 0.0238 |
| CDR2             | -0.65 | 1.01E-02 | 0.0287 |
| RAB5C            | -0.65 | 1.46E-02 | 0.0369 |
| ENST000003987520 | -0.65 | 1.80E-02 | 0.0428 |
| PRR5             | -0.65 | 1.95E-02 | 0.0454 |
| BTN2A1           | -0.65 | 2.02E-02 | 0.0465 |
| TRMT10B          | -0.65 | 1.62E-02 | 0.0397 |
| ZNF287           | -0.65 | 1.26E-02 | 0.0334 |
| CCNL2            | -0.65 | 1.88E-02 | 0.0441 |
| NBEAL2           | -0.66 | 1.75E-02 | 0.0419 |
| MOSMO            | -0.66 | 8.61E-03 | 0.0259 |
| LRCH3            | -0.66 | 1.13E-02 | 0.0311 |
| WDTC1            | -0.66 | 1.88E-02 | 0.0441 |
| TMEM189          | -0.66 | 1.82E-02 | 0.0431 |
| ALG11            | -0.66 | 1.24E-02 | 0.0329 |
| ICAM3            | -0.66 | 1.16E-02 | 0.0315 |
| MFSD1            | -0.66 | 1.89E-02 | 0.0443 |
| ENST000002678900 | -0.66 | 1.26E-02 | 0.0333 |
| ZBTB14           | -0.66 | 1.08E-02 | 0.0302 |
| PIGC             | -0.66 | 2.09E-02 | 0.0476 |
| CWF19L2          | -0.66 | 9.26E-03 | 0.0271 |
| TAS2R30          | -0.66 | 1.88E-02 | 0.0442 |
| SRSF5            | -0.66 | 1.38E-02 | 0.0354 |
| TRAPPC3L         | -0.66 | 1.91E-02 | 0.0446 |
| PRKCH            | -0.66 | 1.48E-02 | 0.0371 |
| PXYLP1           | -0.66 | 1.22E-02 | 0.0326 |
| NEK9             | -0.67 | 1.70E-02 | 0.0410 |
| DIAPH2           | -0.67 | 7.17E-03 | 0.0231 |
| HYPK             | -0.67 | 1.73E-02 | 0.0416 |
| C6orf47          | -0.67 | 1.15E-02 | 0.0315 |
| ENST000002694450 | -0.67 | 1.63E-02 | 0.0398 |
| ZNF800           | -0.67 | 1.07E-02 | 0.0299 |
| ZNF440           | -0.67 | 1.58E-02 | 0.0389 |
| SDHAP1           | -0.67 | 8.90E-03 | 0.0265 |
| ENST000002371770 | -0.67 | 2.13E-02 | 0.0483 |
| INF2             | -0.67 | 1.01E-02 | 0.0288 |

|                  |       |          |        |
|------------------|-------|----------|--------|
| AP001372.2       | -0.67 | 2.17E-02 | 0.0490 |
| CUL9             | -0.67 | 9.07E-03 | 0.0268 |
| C12orf76         | -0.67 | 1.21E-02 | 0.0325 |
| MYO9B            | -0.67 | 1.71E-02 | 0.0411 |
| ANGEL2           | -0.67 | 7.24E-03 | 0.0232 |
| PKN2             | -0.68 | 8.92E-03 | 0.0265 |
| PARGP1           | -0.68 | 9.43E-03 | 0.0274 |
| ZNF445           | -0.68 | 6.50E-03 | 0.0218 |
| KLHL9            | -0.68 | 6.73E-03 | 0.0223 |
| TMEM42           | -0.68 | 1.46E-02 | 0.0368 |
| C1GALT1          | -0.68 | 1.48E-02 | 0.0371 |
| STXBP4           | -0.68 | 1.15E-02 | 0.0314 |
| NBPF14           | -0.68 | 1.36E-02 | 0.0351 |
| RBM45            | -0.68 | 7.56E-03 | 0.0239 |
| PAPOLG           | -0.68 | 7.46E-03 | 0.0236 |
| EFCAB14          | -0.68 | 1.32E-02 | 0.0343 |
| ZFP90            | -0.68 | 8.34E-03 | 0.0254 |
| ZNF354A          | -0.68 | 1.24E-02 | 0.0330 |
| GNB5             | -0.68 | 1.50E-02 | 0.0376 |
| AP4S1            | -0.68 | 9.71E-03 | 0.0280 |
| CNOT6L           | -0.68 | 7.17E-03 | 0.0231 |
| KIAA1328         | -0.69 | 1.16E-02 | 0.0317 |
| ENST000002982481 | -0.69 | 2.12E-02 | 0.0481 |
| ZNF283           | -0.69 | 7.30E-03 | 0.0233 |
| ARID1A           | -0.69 | 1.10E-02 | 0.0304 |
| ITGA5            | -0.69 | 1.26E-02 | 0.0334 |
| AC073073.2       | -0.69 | 2.20E-02 | 0.0495 |
| CYB5R1           | -0.69 | 8.31E-03 | 0.0254 |
| TRBC1            | -0.69 | 9.03E-03 | 0.0267 |
| UBA6-AS1         | -0.69 | 7.43E-03 | 0.0236 |
| COG3             | -0.69 | 5.88E-03 | 0.0204 |
| TES              | -0.69 | 1.88E-02 | 0.0442 |
| KLHDC2           | -0.69 | 6.67E-03 | 0.0221 |
| ENST000003343440 | -0.69 | 9.02E-03 | 0.0267 |
| SEPT7P2          | -0.69 | 8.54E-03 | 0.0258 |
| RBM48            | -0.69 | 8.26E-03 | 0.0253 |
| PHF12            | -0.69 | 6.93E-03 | 0.0227 |
| TNK2             | -0.69 | 1.30E-02 | 0.0340 |
| KRAS             | -0.69 | 7.81E-03 | 0.0243 |
| TNKS2            | -0.69 | 2.03E-02 | 0.0467 |
| SMG1             | -0.69 | 2.20E-02 | 0.0494 |
| TBC1D15          | -0.70 | 1.09E-02 | 0.0303 |
| NAPEPLD          | -0.70 | 1.00E-02 | 0.0286 |
| NPAT             | -0.70 | 7.50E-03 | 0.0237 |
| ENST000003413760 | -0.70 | 7.66E-03 | 0.0241 |
| NOS3             | -0.70 | 2.06E-02 | 0.0472 |
| AC055713.1       | -0.70 | 1.71E-02 | 0.0412 |
| FAM47E           | -0.70 | 1.75E-02 | 0.0419 |
| DCLRE1C          | -0.70 | 8.02E-03 | 0.0248 |
| NECAP2           | -0.70 | 1.84E-02 | 0.0436 |

|                  |       |          |        |
|------------------|-------|----------|--------|
| ENST000003360860 | -0.70 | 1.68E-02 | 0.0406 |
| LUC7L3           | -0.70 | 8.61E-03 | 0.0259 |
| ENST000002511080 | -0.70 | 1.45E-02 | 0.0367 |
| CLCN3            | -0.70 | 6.69E-03 | 0.0222 |
| ENST000002294650 | -0.70 | 2.08E-02 | 0.0474 |
| ENST000003159300 | -0.70 | 8.17E-03 | 0.0251 |
| CASD1            | -0.70 | 6.48E-03 | 0.0217 |
| ZNF623           | -0.70 | 5.78E-03 | 0.0202 |
| ENST000003077142 | -0.70 | 1.38E-02 | 0.0355 |
| ENST000002822724 | -0.70 | 7.29E-03 | 0.0233 |
| ENST000003250832 | -0.70 | 1.47E-02 | 0.0370 |
| ENST000002693910 | -0.70 | 7.01E-03 | 0.0228 |
| TEN1-CDK3        | -0.70 | 1.75E-02 | 0.0419 |
| VPS11            | -0.71 | 1.07E-02 | 0.0299 |
| FCHSD1           | -0.71 | 8.75E-03 | 0.0262 |
| STIM1            | -0.71 | 1.01E-02 | 0.0288 |
| ZNF605           | -0.71 | 7.07E-03 | 0.0229 |
| ENST000003110481 | -0.71 | 9.12E-03 | 0.0269 |
| ZNF720           | -0.71 | 1.35E-02 | 0.0349 |
| SECISBP2         | -0.71 | 9.84E-03 | 0.0283 |
| AL163051.2       | -0.71 | 1.98E-02 | 0.0458 |
| ENST000002639970 | -0.71 | 1.67E-02 | 0.0406 |
| SMAD4            | -0.71 | 5.20E-03 | 0.0189 |
| AL031595.2       | -0.71 | 1.46E-02 | 0.0369 |
| LPCAT4           | -0.71 | 9.93E-03 | 0.0285 |
| RGP1             | -0.72 | 8.13E-03 | 0.0251 |
| SNX15            | -0.72 | 1.76E-02 | 0.0420 |
| AC124312.4       | -0.72 | 1.60E-02 | 0.0393 |
| TFEB             | -0.72 | 1.84E-02 | 0.0435 |
| ZNFX1            | -0.72 | 8.79E-03 | 0.0263 |
| PHF2             | -0.72 | 1.65E-02 | 0.0401 |
| RECK             | -0.72 | 1.64E-02 | 0.0400 |
| AP1G2            | -0.72 | 5.70E-03 | 0.0200 |
| TRAM1            | -0.72 | 1.11E-02 | 0.0307 |
| OGA              | -0.72 | 1.02E-02 | 0.0289 |
| POLI             | -0.72 | 1.71E-02 | 0.0411 |
| STK17B           | -0.72 | 5.92E-03 | 0.0205 |
| NIPBL            | -0.72 | 9.12E-03 | 0.0269 |
| ENST000003344440 | -0.72 | 1.09E-02 | 0.0303 |
| YPEL5            | -0.72 | 8.37E-03 | 0.0255 |
| FLOT2            | -0.72 | 2.00E-02 | 0.0460 |
| ENST000002431891 | -0.72 | 1.71E-02 | 0.0411 |
| TUG1             | -0.72 | 4.79E-03 | 0.0180 |
| ACSF3            | -0.72 | 1.75E-02 | 0.0419 |
| PRORS1P          | -0.72 | 2.13E-02 | 0.0483 |
| ARSK             | -0.72 | 7.70E-03 | 0.0242 |
| MLLT3            | -0.72 | 1.99E-02 | 0.0460 |
| NPEPL1           | -0.72 | 1.26E-02 | 0.0333 |
| ARL14EP          | -0.73 | 1.11E-02 | 0.0307 |
| FNDC3A           | -0.73 | 1.94E-02 | 0.0451 |

|                  |       |          |        |
|------------------|-------|----------|--------|
| TIAL1            | -0.73 | 8.32E-03 | 0.0254 |
| ZC3HAV1          | -0.73 | 6.58E-03 | 0.0220 |
| GANC             | -0.73 | 5.55E-03 | 0.0197 |
| OGFR             | -0.73 | 2.03E-02 | 0.0467 |
| ENST000003159701 | -0.73 | 7.31E-03 | 0.0234 |
| PAQR3            | -0.73 | 8.47E-03 | 0.0257 |
| TSC22D2          | -0.73 | 1.43E-02 | 0.0364 |
| INO80D           | -0.73 | 5.67E-03 | 0.0200 |
| HSD17B4          | -0.73 | 8.90E-03 | 0.0265 |
| ADAMTS4          | -0.73 | 1.64E-02 | 0.0401 |
| STX16            | -0.73 | 1.03E-02 | 0.0292 |
| KRBOX4           | -0.73 | 1.54E-02 | 0.0383 |
| ENST000003058772 | -0.73 | 5.87E-03 | 0.0204 |
| RAD52            | -0.73 | 1.82E-02 | 0.0432 |
| RAB5B            | -0.73 | 1.29E-02 | 0.0339 |
| AC003681.1       | -0.73 | 1.06E-02 | 0.0297 |
| CAPN7            | -0.73 | 8.49E-03 | 0.0257 |
| ABCA11P          | -0.73 | 2.20E-02 | 0.0493 |
| ZNF791           | -0.73 | 7.78E-03 | 0.0243 |
| ENST000003553541 | -0.73 | 1.65E-02 | 0.0401 |
| IDS              | -0.73 | 2.15E-02 | 0.0487 |
| TTC17            | -0.73 | 5.89E-03 | 0.0204 |
| PI4KAP2          | -0.73 | 1.66E-02 | 0.0404 |
| CCDC107          | -0.74 | 9.97E-03 | 0.0285 |
| ZNF721           | -0.74 | 5.78E-03 | 0.0202 |
| LINC01226        | -0.74 | 7.62E-03 | 0.0240 |
| MAPKAPK5-AS1     | -0.74 | 1.79E-02 | 0.0426 |
| MYLK3            | -0.74 | 2.02E-02 | 0.0465 |
| ZNF137P          | -0.74 | 1.08E-02 | 0.0302 |
| ENST000002546050 | -0.74 | 2.08E-02 | 0.0475 |
| PTBP2            | -0.74 | 1.60E-02 | 0.0394 |
| UBXN1            | -0.74 | 7.61E-03 | 0.0240 |
| C5orf63          | -0.74 | 1.04E-02 | 0.0294 |
| ICAM2            | -0.74 | 1.19E-02 | 0.0322 |
| BTBD7            | -0.74 | 6.97E-03 | 0.0228 |
| BBS10            | -0.74 | 7.24E-03 | 0.0232 |
| LDB1             | -0.74 | 5.54E-03 | 0.0196 |
| SLC10A3          | -0.74 | 1.88E-02 | 0.0441 |
| ACSL6            | -0.74 | 7.12E-03 | 0.0230 |
| YIPF4            | -0.74 | 4.88E-03 | 0.0182 |
| ZNF277           | -0.74 | 5.22E-03 | 0.0190 |
| SLC18B1          | -0.74 | 6.60E-03 | 0.0220 |
| HCFC2            | -0.74 | 4.56E-03 | 0.0175 |
| FAM111A-DT       | -0.74 | 1.30E-02 | 0.0341 |
| USP15            | -0.74 | 1.42E-02 | 0.0363 |
| ZNF37BP          | -0.74 | 1.11E-02 | 0.0307 |
| MON2             | -0.74 | 4.82E-03 | 0.0180 |
| CDK13            | -0.74 | 5.80E-03 | 0.0202 |
| FNBP4            | -0.74 | 4.89E-03 | 0.0182 |
| ZBED5            | -0.74 | 4.80E-03 | 0.0180 |

|                  |       |          |        |
|------------------|-------|----------|--------|
| HNRNPH2          | -0.74 | 9.52E-03 | 0.0276 |
| ZNF155           | -0.74 | 1.75E-02 | 0.0418 |
| BRI3             | -0.74 | 1.54E-02 | 0.0383 |
| ELMO1            | -0.74 | 6.07E-03 | 0.0208 |
| CRLF3            | -0.75 | 6.02E-03 | 0.0207 |
| SAT2             | -0.75 | 1.20E-02 | 0.0324 |
| FAM160A2         | -0.75 | 1.25E-02 | 0.0331 |
| UBN2             | -0.75 | 6.05E-03 | 0.0208 |
| PIP4P2           | -0.75 | 1.85E-02 | 0.0436 |
| CYP4A22-AS1      | -0.75 | 1.97E-02 | 0.0457 |
| 38777            | -0.75 | 4.84E-03 | 0.0181 |
| AK9              | -0.75 | 1.95E-02 | 0.0452 |
| FAM200B          | -0.75 | 6.52E-03 | 0.0218 |
| OGG1             | -0.75 | 9.83E-03 | 0.0283 |
| UCKL1            | -0.75 | 2.06E-02 | 0.0472 |
| RABGAP1          | -0.75 | 7.60E-03 | 0.0239 |
| PIGK             | -0.75 | 5.12E-03 | 0.0187 |
| ENST000002981590 | -0.75 | 1.67E-02 | 0.0405 |
| LINC01562        | -0.75 | 1.08E-02 | 0.0302 |
| ENST000003243060 | -0.75 | 1.29E-02 | 0.0339 |
| UVSSA            | -0.75 | 6.03E-03 | 0.0207 |
| LINC00294        | -0.75 | 1.96E-02 | 0.0455 |
| PIK3CD           | -0.75 | 1.48E-02 | 0.0371 |
| WAC-AS1          | -0.75 | 7.76E-03 | 0.0243 |
| PPP1R21          | -0.75 | 1.77E-02 | 0.0421 |
| CALCO2           | -0.76 | 4.59E-03 | 0.0176 |
| ANKRD49          | -0.76 | 5.63E-03 | 0.0198 |
| PTPRE            | -0.76 | 1.08E-02 | 0.0301 |
| LINC00662        | -0.76 | 1.23E-02 | 0.0328 |
| ENST00000639751  | -0.76 | 6.26E-03 | 0.0212 |
| SETD2            | -0.76 | 5.64E-03 | 0.0199 |
| ZNF891           | -0.76 | 7.11E-03 | 0.0230 |
| ZFC3H1           | -0.76 | 4.89E-03 | 0.0182 |
| CLK1             | -0.76 | 9.26E-03 | 0.0271 |
| DNAJC16          | -0.76 | 4.79E-03 | 0.0180 |
| WDR11            | -0.76 | 2.03E-02 | 0.0467 |
| PARP16           | -0.76 | 1.80E-02 | 0.0428 |
| NEK1             | -0.76 | 1.21E-02 | 0.0326 |
| RABL2B           | -0.76 | 1.46E-02 | 0.0368 |
| MTM1             | -0.76 | 2.06E-02 | 0.0472 |
| PRKAG2           | -0.76 | 8.97E-03 | 0.0266 |
| AC099811.1       | -0.76 | 1.31E-02 | 0.0341 |
| ITSN2            | -0.76 | 4.20E-03 | 0.0167 |
| DENND1B          | -0.76 | 9.94E-03 | 0.0285 |
| TDRD3            | -0.76 | 4.44E-03 | 0.0172 |
| PURA             | -0.76 | 4.28E-03 | 0.0168 |
| AP000873.2       | -0.76 | 1.98E-02 | 0.0459 |
| STK4             | -0.77 | 1.02E-02 | 0.0289 |
| CSAD             | -0.77 | 1.22E-02 | 0.0326 |
| PCF11            | -0.77 | 4.29E-03 | 0.0169 |

|                  |       |          |        |
|------------------|-------|----------|--------|
| MAP4K2           | -0.77 | 7.73E-03 | 0.0242 |
| WDR5B            | -0.77 | 1.44E-02 | 0.0366 |
| BLZF1            | -0.77 | 9.99E-03 | 0.0286 |
| ENST000002615560 | -0.77 | 1.43E-02 | 0.0364 |
| FBXO15           | -0.77 | 1.98E-02 | 0.0459 |
| COQ10A           | -0.77 | 9.12E-03 | 0.0269 |
| TRAV5            | -0.77 | 1.66E-02 | 0.0403 |
| ELMOD3           | -0.77 | 8.76E-03 | 0.0262 |
| SRD5A3-AS1       | -0.77 | 2.08E-02 | 0.0474 |
| C16orf70         | -0.77 | 1.54E-02 | 0.0383 |
| LINC01568        | -0.77 | 1.44E-02 | 0.0366 |
| DDX5             | -0.77 | 7.02E-03 | 0.0228 |
| AC090114.2       | -0.77 | 1.88E-02 | 0.0442 |
| ELK3             | -0.77 | 4.71E-03 | 0.0178 |
| PIAS1            | -0.77 | 6.13E-03 | 0.0210 |
| ARL6IP5          | -0.77 | 7.63E-03 | 0.0240 |
| MOB3C            | -0.77 | 6.53E-03 | 0.0218 |
| ENST000002620511 | -0.77 | 6.58E-03 | 0.0219 |
| PCDHA4           | -0.77 | 1.10E-02 | 0.0304 |
| MIR100HG         | -0.77 | 1.96E-02 | 0.0455 |
| LRR8A            | -0.77 | 5.09E-03 | 0.0187 |
| RGS14            | -0.77 | 1.12E-02 | 0.0309 |
| ZNF234           | -0.78 | 5.37E-03 | 0.0193 |
| ZNF169           | -0.78 | 6.29E-03 | 0.0213 |
| C8orf34-AS1      | -0.78 | 1.49E-02 | 0.0374 |
| HMBOX1           | -0.78 | 1.44E-02 | 0.0365 |
| ARHGEF1          | -0.78 | 1.50E-02 | 0.0376 |
| MYLK             | -0.78 | 2.07E-02 | 0.0473 |
| AC007998.4       | -0.78 | 8.34E-03 | 0.0254 |
| TAOK1            | -0.78 | 4.21E-03 | 0.0167 |
| ZKSCAN4          | -0.78 | 9.95E-03 | 0.0285 |
| ZNF529           | -0.78 | 4.37E-03 | 0.0171 |
| OPRM1            | -0.78 | 1.98E-02 | 0.0459 |
| FAM172A          | -0.78 | 3.99E-03 | 0.0161 |
| ARPC3            | -0.78 | 6.37E-03 | 0.0214 |
| WASH5P           | -0.78 | 7.68E-03 | 0.0241 |
| IKZF5            | -0.78 | 4.92E-03 | 0.0183 |
| BAHD1            | -0.78 | 1.17E-02 | 0.0317 |
| ZEB1             | -0.78 | 9.40E-03 | 0.0274 |
| HCG18            | -0.78 | 7.12E-03 | 0.0230 |
| TUBGCP6          | -0.79 | 4.76E-03 | 0.0179 |
| RNF111           | -0.79 | 9.43E-03 | 0.0274 |
| APBB3            | -0.79 | 1.15E-02 | 0.0315 |
| DAAM1            | -0.79 | 1.28E-02 | 0.0337 |
| OPTN             | -0.79 | 9.11E-03 | 0.0269 |
| FBXO11           | -0.79 | 8.44E-03 | 0.0256 |
| GUSBP1           | -0.79 | 9.65E-03 | 0.0279 |
| CNOT4            | -0.79 | 5.57E-03 | 0.0197 |
| TRBV18           | -0.79 | 1.94E-02 | 0.0451 |
| RN7SL49P         | -0.79 | 2.05E-02 | 0.0470 |

|                  |       |          |        |
|------------------|-------|----------|--------|
| CES4A            | -0.79 | 6.37E-03 | 0.0215 |
| ENST000003213410 | -0.79 | 1.13E-02 | 0.0309 |
| CEP70            | -0.79 | 1.16E-02 | 0.0315 |
| DUSP28           | -0.79 | 1.13E-02 | 0.0309 |
| LATS1            | -0.79 | 5.83E-03 | 0.0203 |
| SMAP1            | -0.79 | 5.41E-03 | 0.0194 |
| ZNF557           | -0.79 | 6.25E-03 | 0.0212 |
| DEDD2            | -0.79 | 1.35E-02 | 0.0350 |
| KMT2B            | -0.79 | 1.02E-02 | 0.0288 |
| AC084083.1       | -0.79 | 1.50E-02 | 0.0376 |
| TRAV12-1         | -0.79 | 1.42E-02 | 0.0362 |
| STAG3L3          | -0.79 | 5.93E-03 | 0.0205 |
| AC040162.1       | -0.79 | 2.15E-02 | 0.0486 |
| ENST000003300221 | -0.79 | 9.63E-03 | 0.0279 |
| ARID4A           | -0.79 | 4.03E-03 | 0.0162 |
| MYO18A           | -0.79 | 1.00E-02 | 0.0286 |
| WDR37            | -0.79 | 3.39E-03 | 0.0147 |
| IKZF2            | -0.79 | 1.40E-02 | 0.0358 |
| TMEM127          | -0.80 | 6.01E-03 | 0.0207 |
| CD247            | -0.80 | 8.10E-03 | 0.0250 |
| ZNF565           | -0.80 | 2.01E-02 | 0.0462 |
| KLHL36           | -0.80 | 2.16E-02 | 0.0488 |
| ETS1             | -0.80 | 1.08E-02 | 0.0302 |
| STAT2            | -0.80 | 1.96E-02 | 0.0455 |
| RALGAPA1         | -0.80 | 1.75E-02 | 0.0419 |
| CSRNP2           | -0.80 | 8.22E-03 | 0.0252 |
| ACAD11           | -0.80 | 3.92E-03 | 0.0160 |
| LINC01016        | -0.80 | 1.25E-02 | 0.0331 |
| USF3             | -0.80 | 4.75E-03 | 0.0179 |
| ABR              | -0.80 | 6.22E-03 | 0.0211 |
| PIK3CB           | -0.80 | 1.17E-02 | 0.0317 |
| AGO4             | -0.80 | 9.66E-03 | 0.0279 |
| CPLANE1          | -0.80 | 3.38E-03 | 0.0146 |
| ENST000003208760 | -0.80 | 6.37E-03 | 0.0215 |
| LINC02503        | -0.80 | 7.85E-03 | 0.0244 |
| PPP1R3D          | -0.80 | 2.23E-02 | 0.0499 |
| SRSF8            | -0.80 | 4.80E-03 | 0.0180 |
| PSKH1            | -0.80 | 1.69E-02 | 0.0408 |
| SPTAN1           | -0.80 | 4.78E-03 | 0.0180 |
| HABP4            | -0.80 | 5.16E-03 | 0.0188 |
| BCAS4            | -0.80 | 6.08E-03 | 0.0208 |
| TEPSIN           | -0.80 | 2.18E-02 | 0.0492 |
| MALAT1           | -0.80 | 4.12E-03 | 0.0164 |
| AC007000.2       | -0.80 | 2.09E-02 | 0.0477 |
| EXOC8            | -0.81 | 3.67E-03 | 0.0153 |
| TBRG1            | -0.81 | 3.59E-03 | 0.0151 |
| KLF3-AS1         | -0.81 | 1.19E-02 | 0.0321 |
| SLC9A8           | -0.81 | 1.73E-02 | 0.0416 |
| SGMS1            | -0.81 | 3.48E-03 | 0.0149 |
| ARGLU1           | -0.81 | 7.37E-03 | 0.0235 |

|                  |       |          |        |
|------------------|-------|----------|--------|
| GNPTG            | -0.81 | 6.00E-03 | 0.0207 |
| KIAA1257         | -0.81 | 2.17E-02 | 0.0489 |
| LAMP1            | -0.81 | 6.98E-03 | 0.0228 |
| ENST000003130501 | -0.81 | 7.16E-03 | 0.0231 |
| ZBTB39           | -0.81 | 7.41E-03 | 0.0235 |
| RIN3             | -0.81 | 1.58E-02 | 0.0390 |
| LMBRD1           | -0.81 | 9.07E-03 | 0.0268 |
| AC117529.1       | -0.81 | 9.39E-03 | 0.0274 |
| TMEM245          | -0.81 | 7.78E-03 | 0.0243 |
| DENND1C          | -0.81 | 1.47E-02 | 0.0370 |
| PPP1R12B         | -0.81 | 3.56E-03 | 0.0150 |
| ELF2             | -0.81 | 4.46E-03 | 0.0173 |
| ZNF597           | -0.81 | 1.39E-02 | 0.0357 |
| AC013652.1       | -0.81 | 4.98E-03 | 0.0184 |
| MPHOSPH8         | -0.81 | 3.14E-03 | 0.0140 |
| KLHL20           | -0.81 | 3.33E-03 | 0.0145 |
| CD3E             | -0.82 | 5.42E-03 | 0.0194 |
| GUSBP9           | -0.82 | 1.09E-02 | 0.0303 |
| ALDH2            | -0.82 | 7.21E-03 | 0.0231 |
| GLMP             | -0.82 | 1.99E-02 | 0.0460 |
| PNISR            | -0.82 | 3.61E-03 | 0.0152 |
| SMYD4            | -0.82 | 8.87E-03 | 0.0264 |
| SRPRA            | -0.82 | 1.34E-02 | 0.0347 |
| VPS36            | -0.82 | 3.21E-03 | 0.0142 |
| KIAA0319L        | -0.82 | 5.26E-03 | 0.0190 |
| MGAT4EP          | -0.82 | 2.13E-02 | 0.0484 |
| ACAA1            | -0.82 | 1.69E-02 | 0.0409 |
| KANSL1           | -0.82 | 1.48E-02 | 0.0373 |
| HECTD4           | -0.82 | 6.87E-03 | 0.0226 |
| AP000640.2       | -0.82 | 1.83E-02 | 0.0433 |
| FGF23            | -0.82 | 8.26E-03 | 0.0253 |
| FRS2             | -0.82 | 6.91E-03 | 0.0226 |
| DEF6             | -0.82 | 6.62E-03 | 0.0220 |
| STX7             | -0.82 | 5.02E-03 | 0.0185 |
| LINS1            | -0.82 | 8.86E-03 | 0.0264 |
| AC073052.1       | -0.82 | 1.71E-02 | 0.0411 |
| TMBIM4           | -0.82 | 1.53E-02 | 0.0381 |
| ZKSCAN2-DT       | -0.82 | 6.86E-03 | 0.0225 |
| ADAM10           | -0.82 | 1.55E-02 | 0.0384 |
| TSPAN6           | -0.82 | 1.52E-02 | 0.0379 |
| LINC01694        | -0.82 | 2.11E-02 | 0.0480 |
| TSHZ1            | -0.82 | 1.66E-02 | 0.0403 |
| RASA2            | -0.82 | 5.17E-03 | 0.0188 |
| PIKFYVE          | -0.82 | 5.51E-03 | 0.0196 |
| INPP4B           | -0.82 | 3.17E-03 | 0.0141 |
| AL162171.3       | -0.82 | 1.54E-02 | 0.0382 |
| AC004156.1       | -0.83 | 1.90E-02 | 0.0445 |
| CAMKMT           | -0.83 | 6.59E-03 | 0.0220 |
| BMS1P1           | -0.83 | 4.40E-03 | 0.0171 |
| AKAP9            | -0.83 | 3.33E-03 | 0.0145 |

|                  |       |          |        |
|------------------|-------|----------|--------|
| FAM45A           | -0.83 | 3.38E-03 | 0.0146 |
| TTC32            | -0.83 | 1.90E-02 | 0.0445 |
| RBSN             | -0.83 | 1.09E-02 | 0.0304 |
| BPTF             | -0.83 | 3.33E-03 | 0.0145 |
| SNORA12          | -0.83 | 2.09E-02 | 0.0476 |
| C2CD5            | -0.83 | 2.82E-03 | 0.0133 |
| KIAA0556         | -0.83 | 2.03E-02 | 0.0467 |
| LINC00342        | -0.83 | 3.73E-03 | 0.0155 |
| FCHO1            | -0.83 | 6.76E-03 | 0.0223 |
| AL356235.1       | -0.83 | 1.18E-02 | 0.0319 |
| ENST000002751590 | -0.83 | 6.86E-03 | 0.0225 |
| AC009113.1       | -0.83 | 2.18E-02 | 0.0491 |
| PIP5K1C          | -0.83 | 1.35E-02 | 0.0349 |
| SPTBN1           | -0.83 | 9.04E-03 | 0.0267 |
| TSC2             | -0.83 | 1.67E-02 | 0.0406 |
| KLF11            | -0.83 | 2.00E-02 | 0.0461 |
| CIZ1             | -0.83 | 1.96E-02 | 0.0455 |
| NIN              | -0.84 | 1.17E-02 | 0.0318 |
| ZNF433-AS1       | -0.84 | 1.33E-02 | 0.0345 |
| PRKAB1           | -0.84 | 1.04E-02 | 0.0293 |
| LINC01814        | -0.84 | 9.04E-03 | 0.0267 |
| AC087894.1       | -0.84 | 9.28E-03 | 0.0272 |
| LUC7L            | -0.84 | 4.67E-03 | 0.0178 |
| AL355997.1       | -0.84 | 2.11E-02 | 0.0480 |
| SEC31A           | -0.84 | 9.97E-03 | 0.0285 |
| ZMAT3            | -0.84 | 7.96E-03 | 0.0247 |
| NECAB3           | -0.84 | 1.56E-02 | 0.0386 |
| WDR45            | -0.84 | 6.48E-03 | 0.0217 |
| FBXO44           | -0.84 | 6.39E-03 | 0.0215 |
| AC138393.1       | -0.84 | 8.88E-03 | 0.0264 |
| ZNF14            | -0.84 | 3.29E-03 | 0.0144 |
| AL049646.1       | -0.84 | 1.39E-02 | 0.0357 |
| TMEM123          | -0.84 | 5.44E-03 | 0.0194 |
| UXS1             | -0.84 | 1.98E-02 | 0.0458 |
| ENST000002850211 | -0.84 | 1.45E-02 | 0.0367 |
| TRIM52-AS1       | -0.84 | 9.23E-03 | 0.0271 |
| ENST000003084880 | -0.84 | 4.01E-03 | 0.0162 |
| KLF13            | -0.84 | 7.15E-03 | 0.0231 |
| ACOT11           | -0.84 | 8.15E-03 | 0.0251 |
| SLC1A6           | -0.84 | 2.03E-02 | 0.0467 |
| ARMC7            | -0.84 | 9.33E-03 | 0.0273 |
| AAK1             | -0.84 | 4.28E-03 | 0.0168 |
| NFE2L2           | -0.84 | 1.08E-02 | 0.0302 |
| SLC25A45         | -0.84 | 2.02E-02 | 0.0464 |
| RUBCN            | -0.84 | 3.71E-03 | 0.0155 |
| RBM33            | -0.84 | 3.27E-03 | 0.0143 |
| PHKB             | -0.84 | 3.64E-03 | 0.0153 |
| SLAIN1           | -0.84 | 9.22E-03 | 0.0271 |
| EPG5             | -0.85 | 3.79E-03 | 0.0156 |
| ZFYVE26          | -0.85 | 4.98E-03 | 0.0184 |

|                  |       |          |        |
|------------------|-------|----------|--------|
| FRG1JP           | -0.85 | 1.61E-02 | 0.0395 |
| RN7SL732P        | -0.85 | 2.19E-02 | 0.0493 |
| AC060234.2       | -0.85 | 1.42E-02 | 0.0362 |
| SDR39U1          | -0.85 | 5.69E-03 | 0.0200 |
| ZNF609           | -0.85 | 2.75E-03 | 0.0131 |
| HAPLN3           | -0.85 | 7.20E-03 | 0.0231 |
| IRAK4            | -0.85 | 2.85E-03 | 0.0134 |
| AC093752.1       | -0.85 | 1.20E-02 | 0.0323 |
| TRIM34           | -0.85 | 1.22E-02 | 0.0326 |
| AP005131.1       | -0.85 | 1.65E-02 | 0.0402 |
| CORO7            | -0.85 | 6.95E-03 | 0.0227 |
| FNIP1            | -0.85 | 6.85E-03 | 0.0225 |
| VPS53            | -0.85 | 3.31E-03 | 0.0144 |
| WBP1L            | -0.85 | 8.27E-03 | 0.0253 |
| ZNF606           | -0.85 | 5.14E-03 | 0.0188 |
| ZBTB8B           | -0.85 | 8.74E-03 | 0.0262 |
| AC093297.2       | -0.85 | 6.78E-03 | 0.0223 |
| TMEM161B         | -0.85 | 6.34E-03 | 0.0214 |
| RNASEH2B         | -0.85 | 1.45E-02 | 0.0367 |
| PDPR             | -0.85 | 2.20E-02 | 0.0495 |
| MAP3K12          | -0.86 | 5.77E-03 | 0.0202 |
| NSUN5P2          | -0.86 | 1.63E-02 | 0.0399 |
| AP000919.1       | -0.86 | 7.68E-03 | 0.0241 |
| MACF1            | -0.86 | 3.64E-03 | 0.0153 |
| EPS15L1          | -0.86 | 1.21E-02 | 0.0324 |
| AC137932.3       | -0.86 | 1.16E-02 | 0.0316 |
| VPS26B           | -0.86 | 4.62E-03 | 0.0176 |
| ENST000003582320 | -0.86 | 2.72E-03 | 0.0131 |
| YY1AP1           | -0.86 | 2.12E-02 | 0.0481 |
| MXD1             | -0.86 | 4.57E-03 | 0.0176 |
| AC020978.7       | -0.86 | 8.58E-03 | 0.0259 |
| RNF149           | -0.86 | 2.48E-03 | 0.0124 |
| ENST000002621600 | -0.86 | 1.11E-02 | 0.0307 |
| ARHGAP27         | -0.86 | 4.29E-03 | 0.0169 |
| SPPL2B           | -0.86 | 1.60E-02 | 0.0394 |
| BTBD9            | -0.86 | 2.80E-03 | 0.0133 |
| CLUAP1           | -0.86 | 7.28E-03 | 0.0233 |
| ZNF780B          | -0.86 | 2.98E-03 | 0.0137 |
| NCOA6            | -0.86 | 5.40E-03 | 0.0194 |
| NDEL1            | -0.86 | 1.26E-02 | 0.0333 |
| PBLD             | -0.86 | 1.12E-02 | 0.0308 |
| CBLB             | -0.86 | 4.90E-03 | 0.0182 |
| SMARCA2          | -0.87 | 1.06E-02 | 0.0297 |
| ZNF91            | -0.87 | 1.24E-02 | 0.0330 |
| C11orf71         | -0.87 | 1.18E-02 | 0.0318 |
| NBPF11           | -0.87 | 1.22E-02 | 0.0326 |
| XPA              | -0.87 | 3.09E-03 | 0.0140 |
| AC092910.3       | -0.87 | 1.39E-02 | 0.0357 |
| AC106820.4       | -0.87 | 1.25E-02 | 0.0331 |
| CYB561D2         | -0.87 | 7.78E-03 | 0.0243 |

|                  |       |          |        |
|------------------|-------|----------|--------|
| AFF1             | -0.87 | 1.85E-02 | 0.0437 |
| ARHGEF6          | -0.87 | 4.44E-03 | 0.0172 |
| ZKSCAN8          | -0.87 | 2.61E-03 | 0.0127 |
| TRDMT1           | -0.87 | 6.73E-03 | 0.0223 |
| AC138409.2       | -0.87 | 1.26E-02 | 0.0333 |
| OR5AS1           | -0.87 | 3.22E-03 | 0.0142 |
| AC103957.1       | -0.87 | 9.18E-03 | 0.0270 |
| ZNF441           | -0.87 | 2.68E-03 | 0.0129 |
| MYORG            | -0.87 | 6.69E-03 | 0.0222 |
| AC018554.1       | -0.87 | 1.85E-02 | 0.0436 |
| SLC7A6           | -0.87 | 2.12E-02 | 0.0481 |
| OSBPL2           | -0.87 | 3.05E-03 | 0.0138 |
| KIF6             | -0.87 | 1.60E-02 | 0.0393 |
| YAF2             | -0.87 | 3.86E-03 | 0.0158 |
| ZNF230           | -0.88 | 6.43E-03 | 0.0216 |
| TRAF5            | -0.88 | 3.46E-03 | 0.0148 |
| SCARNA9          | -0.88 | 9.64E-03 | 0.0279 |
| WASHC2A          | -0.88 | 3.07E-03 | 0.0139 |
| AC025279.1       | -0.88 | 1.95E-02 | 0.0453 |
| SNN              | -0.88 | 3.65E-03 | 0.0153 |
| AFF4             | -0.88 | 5.53E-03 | 0.0196 |
| CDH26            | -0.88 | 1.15E-02 | 0.0315 |
| PAXIP1-AS1       | -0.88 | 1.02E-02 | 0.0290 |
| MED15            | -0.88 | 1.66E-02 | 0.0403 |
| COG1             | -0.88 | 7.98E-03 | 0.0247 |
| AC074141.1       | -0.88 | 1.45E-02 | 0.0368 |
| ENST000003162863 | -0.88 | 1.16E-02 | 0.0317 |
| DGKZ             | -0.88 | 7.66E-03 | 0.0241 |
| AF131215.6       | -0.88 | 7.78E-03 | 0.0243 |
| MBTD1            | -0.88 | 2.84E-03 | 0.0133 |
| TMC6             | -0.88 | 3.83E-03 | 0.0158 |
| MEI1             | -0.88 | 1.03E-02 | 0.0292 |
| AL353625.1       | -0.88 | 1.42E-02 | 0.0362 |
| CDKL1            | -0.88 | 2.14E-02 | 0.0485 |
| KLHL21           | -0.88 | 4.19E-03 | 0.0166 |
| RUFY2            | -0.88 | 2.79E-03 | 0.0133 |
| SLC38A7          | -0.88 | 8.62E-03 | 0.0259 |
| WTIP             | -0.88 | 1.40E-02 | 0.0357 |
| ZNF845           | -0.88 | 3.44E-03 | 0.0148 |
| METTL25          | -0.88 | 1.60E-02 | 0.0393 |
| OR5BA1P          | -0.88 | 1.02E-02 | 0.0290 |
| OR10G3           | -0.88 | 1.15E-02 | 0.0315 |
| PTEN             | -0.88 | 2.45E-03 | 0.0123 |
| AC118459.2       | -0.88 | 1.54E-02 | 0.0382 |
| SLC22A5          | -0.88 | 1.05E-02 | 0.0294 |
| IFT80            | -0.88 | 4.50E-03 | 0.0174 |
| AC013394.1       | -0.88 | 4.09E-03 | 0.0164 |
| TNFAIP8L2        | -0.88 | 3.94E-03 | 0.0160 |
| HIF3A            | -0.89 | 1.66E-02 | 0.0404 |
| RNF139-AS1       | -0.89 | 1.80E-02 | 0.0428 |

|                  |       |          |        |
|------------------|-------|----------|--------|
| AC005005.4       | -0.89 | 5.30E-03 | 0.0191 |
| GNAQ             | -0.89 | 2.66E-03 | 0.0129 |
| ELF1             | -0.89 | 7.03E-03 | 0.0229 |
| LINC02018        | -0.89 | 1.26E-02 | 0.0334 |
| AL360270.2       | -0.89 | 6.78E-03 | 0.0223 |
| TTC28            | -0.89 | 1.81E-02 | 0.0429 |
| RF00017.187      | -0.89 | 2.21E-02 | 0.0496 |
| RNF146           | -0.89 | 2.79E-03 | 0.0133 |
| KCNQ1OT1         | -0.89 | 2.09E-03 | 0.0112 |
| C8orf44          | -0.89 | 1.17E-02 | 0.0318 |
| AC010680.2       | -0.89 | 1.15E-02 | 0.0314 |
| AP5M1            | -0.89 | 7.82E-03 | 0.0244 |
| CDC37L1          | -0.89 | 2.32E-03 | 0.0120 |
| BMS1P2           | -0.89 | 5.99E-03 | 0.0207 |
| CCDC88C          | -0.89 | 1.60E-02 | 0.0393 |
| LNPEP            | -0.89 | 4.92E-03 | 0.0183 |
| FCRL5            | -0.89 | 7.06E-03 | 0.0229 |
| MAU2             | -0.89 | 1.56E-02 | 0.0387 |
| GPR21            | -0.89 | 2.12E-02 | 0.0482 |
| SMG1P7           | -0.89 | 5.12E-03 | 0.0187 |
| CMC1             | -0.89 | 7.00E-03 | 0.0228 |
| LINC00346        | -0.90 | 8.00E-03 | 0.0247 |
| AC105285.1       | -0.90 | 1.64E-02 | 0.0400 |
| CD55             | -0.90 | 2.73E-03 | 0.0131 |
| PAIP2B           | -0.90 | 6.09E-03 | 0.0209 |
| TRBV15           | -0.90 | 1.05E-02 | 0.0296 |
| NUPR1            | -0.90 | 1.34E-02 | 0.0347 |
| CD3G             | -0.90 | 2.55E-03 | 0.0126 |
| GUSBP2           | -0.90 | 7.79E-03 | 0.0243 |
| ZNF776           | -0.90 | 3.32E-03 | 0.0145 |
| MIR193BHG        | -0.90 | 2.21E-02 | 0.0496 |
| SETDB2           | -0.90 | 8.25E-03 | 0.0253 |
| AC006504.1       | -0.90 | 7.09E-03 | 0.0230 |
| AC106820.2       | -0.90 | 1.29E-02 | 0.0339 |
| GPR135           | -0.90 | 8.72E-03 | 0.0262 |
| AP001469.3       | -0.90 | 8.73E-03 | 0.0262 |
| ZNF816           | -0.90 | 1.32E-02 | 0.0344 |
| BBS9             | -0.90 | 1.78E-02 | 0.0425 |
| TEX9             | -0.90 | 1.21E-02 | 0.0326 |
| ENST000003064810 | -0.90 | 1.29E-02 | 0.0339 |
| AC016907.2       | -0.90 | 1.28E-02 | 0.0337 |
| RBM26            | -0.90 | 1.22E-02 | 0.0327 |
| HEATR5B          | -0.90 | 6.32E-03 | 0.0214 |
| BLMH             | -0.91 | 6.91E-03 | 0.0226 |
| GPD1L            | -0.91 | 2.49E-03 | 0.0124 |
| TPD52L1          | -0.91 | 1.68E-02 | 0.0407 |
| MAP4K4           | -0.91 | 1.98E-03 | 0.0108 |
| ZNF416           | -0.91 | 9.33E-03 | 0.0273 |
| ZAP70            | -0.91 | 1.02E-02 | 0.0290 |
| AL355075.4       | -0.91 | 4.16E-03 | 0.0165 |

|                  |       |          |        |
|------------------|-------|----------|--------|
| SP140L           | -0.91 | 1.49E-02 | 0.0374 |
| PIK3CA           | -0.91 | 1.98E-02 | 0.0458 |
| AC024568.1       | -0.91 | 1.27E-02 | 0.0336 |
| C5orf22          | -0.91 | 7.19E-03 | 0.0231 |
| FAM117B          | -0.91 | 1.70E-02 | 0.0409 |
| ENST000003196703 | -0.91 | 1.93E-02 | 0.0450 |
| BRD1             | -0.91 | 1.02E-02 | 0.0290 |
| JMJD1C           | -0.91 | 2.31E-03 | 0.0119 |
| ELP4             | -0.91 | 2.62E-03 | 0.0128 |
| ERBIN            | -0.91 | 2.85E-03 | 0.0134 |
| SYDE2            | -0.91 | 5.22E-03 | 0.0190 |
| NAAA             | -0.91 | 7.88E-03 | 0.0245 |
| SPACA6P-AS       | -0.91 | 1.30E-02 | 0.0339 |
| RC3H2            | -0.91 | 1.95E-03 | 0.0108 |
| ZFYVE16          | -0.91 | 3.08E-03 | 0.0139 |
| ZNF701           | -0.91 | 1.01E-02 | 0.0287 |
| ZNF573           | -0.91 | 5.43E-03 | 0.0194 |
| ZNF284           | -0.91 | 1.13E-02 | 0.0310 |
| ZNF615           | -0.91 | 2.87E-03 | 0.0134 |
| ZNF337           | -0.91 | 2.90E-03 | 0.0135 |
| AC020978.6       | -0.91 | 8.32E-03 | 0.0254 |
| EP400P1          | -0.91 | 4.70E-03 | 0.0178 |
| SARM1            | -0.91 | 4.29E-03 | 0.0169 |
| LRIG2            | -0.91 | 2.64E-03 | 0.0128 |
| ZNF83            | -0.91 | 1.80E-02 | 0.0428 |
| LZTFL1           | -0.91 | 9.11E-03 | 0.0269 |
| MRNIP            | -0.91 | 4.96E-03 | 0.0184 |
| ZNF251           | -0.91 | 1.29E-02 | 0.0338 |
| DAZAP2           | -0.92 | 5.56E-03 | 0.0197 |
| UBOX5            | -0.92 | 6.70E-03 | 0.0222 |
| KAT6A            | -0.92 | 2.10E-03 | 0.0113 |
| ENST000002489010 | -0.92 | 2.12E-03 | 0.0113 |
| STK33            | -0.92 | 8.28E-03 | 0.0253 |
| ENST000003405351 | -0.92 | 8.81E-03 | 0.0263 |
| CDC42SE2         | -0.92 | 1.96E-03 | 0.0108 |
| GYG1             | -0.92 | 1.07E-02 | 0.0300 |
| CBL              | -0.92 | 3.42E-03 | 0.0147 |
| TBCEL            | -0.92 | 6.55E-03 | 0.0219 |
| RPGR             | -0.92 | 1.11E-02 | 0.0306 |
| ZNF658B          | -0.92 | 1.10E-02 | 0.0305 |
| DNAJC27          | -0.92 | 2.14E-02 | 0.0485 |
| CDKL5            | -0.92 | 1.51E-02 | 0.0377 |
| CARD6            | -0.92 | 9.90E-03 | 0.0284 |
| SPPL3            | -0.92 | 7.91E-03 | 0.0246 |
| KMT2C            | -0.92 | 5.40E-03 | 0.0194 |
| AC007326.5       | -0.92 | 9.94E-03 | 0.0285 |
| SPNS1            | -0.92 | 7.35E-03 | 0.0234 |
| ENST000003033910 | -0.92 | 4.43E-03 | 0.0172 |
| ARHGEF26-AS1     | -0.92 | 1.68E-02 | 0.0407 |
| SLC39A10         | -0.92 | 3.12E-03 | 0.0140 |

|                  |       |          |        |
|------------------|-------|----------|--------|
| OR6Y1            | -0.92 | 6.70E-03 | 0.0222 |
| TTYH1            | -0.92 | 1.72E-02 | 0.0414 |
| SCIMP            | -0.92 | 1.72E-02 | 0.0414 |
| MSL2             | -0.92 | 2.73E-03 | 0.0131 |
| ENST000002740300 | -0.93 | 2.01E-02 | 0.0462 |
| LNX2             | -0.93 | 7.47E-03 | 0.0237 |
| CACNA1A          | -0.93 | 8.36E-03 | 0.0255 |
| PDCD4            | -0.93 | 1.32E-02 | 0.0344 |
| Z97989.1         | -0.93 | 1.26E-02 | 0.0333 |
| ANKRD13D         | -0.93 | 3.78E-03 | 0.0156 |
| ARHGEF9          | -0.93 | 1.37E-02 | 0.0353 |
| SPATA6L          | -0.93 | 7.99E-03 | 0.0247 |
| NPIP4            | -0.93 | 1.84E-02 | 0.0435 |
| AC068620.3       | -0.93 | 1.95E-02 | 0.0454 |
| ENST000002584840 | -0.93 | 2.59E-03 | 0.0127 |
| ZNF611           | -0.93 | 6.13E-03 | 0.0210 |
| PPARA            | -0.93 | 2.54E-03 | 0.0125 |
| ERCC6            | -0.93 | 5.91E-03 | 0.0205 |
| ENST000003443370 | -0.93 | 1.93E-03 | 0.0107 |
| RPAP2            | -0.93 | 1.91E-03 | 0.0106 |
| FAM199X          | -0.93 | 3.14E-03 | 0.0140 |
| LINC01695        | -0.93 | 5.86E-03 | 0.0204 |
| ENST000002992400 | -0.93 | 9.34E-03 | 0.0273 |
| PCDHB1           | -0.93 | 1.27E-02 | 0.0334 |
| PCIF1            | -0.93 | 1.31E-02 | 0.0342 |
| ZNF580           | -0.93 | 8.04E-03 | 0.0248 |
| RAB11FIP2        | -0.93 | 2.81E-03 | 0.0133 |
| RN7SL760P        | -0.93 | 2.11E-02 | 0.0480 |
| AC103740.1       | -0.93 | 1.48E-02 | 0.0372 |
| PAN3             | -0.93 | 2.15E-03 | 0.0114 |
| TJP1             | -0.93 | 2.15E-02 | 0.0486 |
| ZMYM4            | -0.93 | 1.45E-02 | 0.0367 |
| AC007342.4       | -0.93 | 2.01E-02 | 0.0464 |
| ZXDA             | -0.93 | 3.98E-03 | 0.0161 |
| PLEKHM3          | -0.93 | 2.52E-03 | 0.0125 |
| DENND4B          | -0.94 | 5.82E-03 | 0.0203 |
| WASL             | -0.94 | 1.33E-02 | 0.0345 |
| AC092326.1       | -0.94 | 1.30E-02 | 0.0340 |
| AC246789.2       | -0.94 | 1.30E-02 | 0.0340 |
| RGR              | -0.94 | 1.67E-02 | 0.0405 |
| SPATA17          | -0.94 | 1.04E-02 | 0.0293 |
| ZNF461           | -0.94 | 2.98E-03 | 0.0137 |
| EFHC1            | -0.94 | 4.13E-03 | 0.0165 |
| FBXO25           | -0.94 | 1.20E-02 | 0.0323 |
| ZNF33A           | -0.94 | 4.05E-03 | 0.0162 |
| S100PBP          | -0.94 | 2.36E-03 | 0.0121 |
| TRIM68           | -0.94 | 2.18E-02 | 0.0491 |
| TAS2R64P         | -0.94 | 5.23E-03 | 0.0190 |
| OR8A1            | -0.94 | 8.74E-03 | 0.0262 |
| TIA1             | -0.94 | 2.33E-03 | 0.0120 |

|                  |       |          |        |
|------------------|-------|----------|--------|
| LINC00680        | -0.94 | 5.24E-03 | 0.0190 |
| TBXAS1           | -0.94 | 1.15E-02 | 0.0314 |
| ANKRD36BP2       | -0.94 | 3.84E-03 | 0.0158 |
| HIPK1            | -0.94 | 3.08E-03 | 0.0139 |
| OR5M2P           | -0.94 | 1.53E-02 | 0.0380 |
| AF131215.5       | -0.94 | 1.59E-02 | 0.0391 |
| AC011939.1       | -0.94 | 1.97E-02 | 0.0457 |
| HERC2P8          | -0.94 | 2.06E-02 | 0.0471 |
| SLC26A2          | -0.94 | 4.26E-03 | 0.0168 |
| TESMIN           | -0.94 | 1.86E-02 | 0.0438 |
| LINC00174        | -0.94 | 8.36E-03 | 0.0255 |
| KDM7A-DT         | -0.94 | 1.76E-02 | 0.0419 |
| ZNF266           | -0.94 | 2.48E-03 | 0.0124 |
| GON4L            | -0.94 | 2.81E-03 | 0.0133 |
| CAPN10-DT        | -0.94 | 1.07E-02 | 0.0300 |
| PPP3CC           | -0.94 | 4.20E-03 | 0.0166 |
| LDLRAD4          | -0.94 | 1.20E-02 | 0.0322 |
| MPRIP            | -0.94 | 3.20E-03 | 0.0142 |
| ENST000003710680 | -0.94 | 9.82E-03 | 0.0282 |
| FAM120B          | -0.94 | 3.25E-03 | 0.0143 |
| CD53             | -0.94 | 1.93E-03 | 0.0107 |
| LMF2             | -0.95 | 7.19E-03 | 0.0231 |
| NRP1             | -0.95 | 1.93E-02 | 0.0449 |
| ENST000002856790 | -0.95 | 2.97E-03 | 0.0136 |
| CSMD3            | -0.95 | 6.08E-03 | 0.0208 |
| EMP2             | -0.95 | 9.52E-03 | 0.0276 |
| AL713866.1       | -0.95 | 1.63E-02 | 0.0398 |
| TYW1B            | -0.95 | 8.58E-03 | 0.0259 |
| HARBI1           | -0.95 | 1.28E-02 | 0.0337 |
| ENST000003170252 | -0.95 | 4.76E-03 | 0.0179 |
| ZIM2-AS1         | -0.95 | 8.91E-03 | 0.0265 |
| STAG3L1          | -0.95 | 1.19E-02 | 0.0321 |
| LINC02471        | -0.95 | 1.84E-02 | 0.0435 |
| GADL1            | -0.95 | 7.20E-03 | 0.0231 |
| ABLIM1           | -0.95 | 4.19E-03 | 0.0166 |
| KLRD1            | -0.95 | 3.38E-03 | 0.0146 |
| ZNF655           | -0.95 | 1.71E-03 | 0.0101 |
| BBOF1            | -0.95 | 7.53E-03 | 0.0238 |
| NBPF10           | -0.95 | 9.59E-03 | 0.0278 |
| AC256309.2       | -0.95 | 1.22E-02 | 0.0326 |
| AC099550.1       | -0.95 | 1.27E-02 | 0.0336 |
| AC010327.5       | -0.95 | 1.83E-02 | 0.0434 |
| GCC2             | -0.95 | 5.66E-03 | 0.0199 |
| HIVEP2           | -0.95 | 7.45E-03 | 0.0236 |
| KYNU             | -0.95 | 2.38E-03 | 0.0121 |
| ASTE1            | -0.95 | 8.56E-03 | 0.0258 |
| LYRM9            | -0.95 | 8.45E-03 | 0.0256 |
| CNTNAP3B         | -0.95 | 2.19E-02 | 0.0493 |
| ENST000003559770 | -0.95 | 6.94E-03 | 0.0227 |
| AC132008.2       | -0.96 | 7.17E-03 | 0.0231 |

|                  |       |          |        |
|------------------|-------|----------|--------|
| MOK              | -0.96 | 6.45E-03 | 0.0216 |
| SH3BGR1          | -0.96 | 1.73E-02 | 0.0415 |
| ENST000002665460 | -0.96 | 1.72E-02 | 0.0413 |
| PAXX             | -0.96 | 5.55E-03 | 0.0197 |
| ABCC10           | -0.96 | 2.73E-03 | 0.0131 |
| AL603840.1       | -0.96 | 6.81E-03 | 0.0224 |
| PRKAB2           | -0.96 | 3.12E-03 | 0.0140 |
| CDKN1B           | -0.96 | 7.42E-03 | 0.0236 |
| ZNF585B          | -0.96 | 2.93E-03 | 0.0135 |
| CD37             | -0.96 | 7.20E-03 | 0.0231 |
| ATP2A3           | -0.96 | 4.25E-03 | 0.0167 |
| SEMA4F           | -0.96 | 6.48E-03 | 0.0217 |
| ESYT2            | -0.96 | 1.20E-02 | 0.0324 |
| ENST000002633980 | -0.96 | 1.28E-02 | 0.0338 |
| HELLPAR          | -0.96 | 1.84E-03 | 0.0105 |
| AL513523.1       | -0.96 | 9.51E-03 | 0.0276 |
| AL513523.5       | -0.96 | 9.51E-03 | 0.0276 |
| TECR             | -0.96 | 5.11E-03 | 0.0187 |
| LACTB2-AS1       | -0.96 | 1.06E-02 | 0.0297 |
| IRF7             | -0.96 | 1.78E-02 | 0.0423 |
| LINC01578        | -0.96 | 1.97E-03 | 0.0108 |
| AGAP5            | -0.96 | 6.12E-03 | 0.0209 |
| ZNF394           | -0.96 | 1.58E-03 | 0.0097 |
| MSS51            | -0.96 | 1.49E-02 | 0.0375 |
| AL117378.1       | -0.96 | 6.23E-03 | 0.0211 |
| SF1              | -0.96 | 1.19E-02 | 0.0322 |
| AC123768.4       | -0.96 | 1.01E-02 | 0.0288 |
| AC016708.1       | -0.96 | 3.73E-03 | 0.0155 |
| TRAK2            | -0.97 | 1.05E-02 | 0.0294 |
| LYSMD4           | -0.97 | 4.13E-03 | 0.0165 |
| ENST000002908550 | -0.97 | 1.32E-02 | 0.0344 |
| ZNF548           | -0.97 | 2.88E-03 | 0.0134 |
| AC092821.3       | -0.97 | 1.52E-02 | 0.0379 |
| KMT2D            | -0.97 | 1.83E-02 | 0.0433 |
| TTLL7-IT1        | -0.97 | 1.98E-02 | 0.0459 |
| RBM5             | -0.97 | 1.63E-03 | 0.0098 |
| HERC1            | -0.97 | 2.08E-03 | 0.0112 |
| TMEM116          | -0.97 | 8.18E-03 | 0.0251 |
| OR7A17           | -0.97 | 1.56E-02 | 0.0386 |
| AC002551.1       | -0.97 | 2.17E-02 | 0.0490 |
| AL033397.1       | -0.97 | 8.08E-03 | 0.0249 |
| AL590764.1       | -0.97 | 1.25E-02 | 0.0332 |
| MRTFA            | -0.97 | 1.96E-02 | 0.0454 |
| EP300            | -0.97 | 2.44E-03 | 0.0123 |
| ZNF592           | -0.97 | 4.71E-03 | 0.0178 |
| TRAJ35           | -0.97 | 1.51E-02 | 0.0378 |
| ZNF260           | -0.97 | 1.78E-03 | 0.0103 |
| TRAJ5            | -0.97 | 1.11E-02 | 0.0306 |
| LMCD1-AS1        | -0.97 | 1.58E-02 | 0.0390 |
| CLYBL            | -0.97 | 2.20E-02 | 0.0495 |

|                  |       |          |        |
|------------------|-------|----------|--------|
| CNTRL            | -0.97 | 3.20E-03 | 0.0142 |
| ACER2            | -0.97 | 8.96E-03 | 0.0266 |
| Z95114.2         | -0.97 | 1.20E-02 | 0.0324 |
| ZNF773           | -0.97 | 3.25E-03 | 0.0143 |
| LENG1            | -0.97 | 6.94E-03 | 0.0227 |
| AP000866.6       | -0.98 | 9.83E-03 | 0.0283 |
| RAB33B           | -0.98 | 7.97E-03 | 0.0247 |
| E2F3-IT1         | -0.98 | 1.40E-02 | 0.0359 |
| C17orf77         | -0.98 | 7.82E-03 | 0.0244 |
| VILL             | -0.98 | 2.10E-02 | 0.0478 |
| HYDIN            | -0.98 | 2.10E-02 | 0.0478 |
| SSH2             | -0.98 | 1.56E-03 | 0.0096 |
| CFAP69           | -0.98 | 1.15E-02 | 0.0314 |
| ZNF596           | -0.98 | 8.11E-03 | 0.0250 |
| SMCR8            | -0.98 | 6.02E-03 | 0.0207 |
| TRAJ33           | -0.98 | 5.25E-03 | 0.0190 |
| CNPY4            | -0.98 | 1.62E-02 | 0.0397 |
| ZNF674           | -0.98 | 3.85E-03 | 0.0158 |
| ITFG2            | -0.98 | 2.09E-03 | 0.0112 |
| PNRC1            | -0.98 | 1.25E-02 | 0.0331 |
| LINC01359        | -0.98 | 1.58E-02 | 0.0389 |
| KLHL28           | -0.98 | 5.56E-03 | 0.0197 |
| SLITRK2          | -0.98 | 1.27E-02 | 0.0335 |
| ENST00000562313  | -0.98 | 1.49E-02 | 0.0374 |
| ORMDL1           | -0.98 | 2.45E-03 | 0.0123 |
| AC004494.1       | -0.98 | 1.43E-02 | 0.0363 |
| CLIP1            | -0.98 | 6.21E-03 | 0.0211 |
| PCED1B           | -0.98 | 1.22E-02 | 0.0326 |
| MBLAC2           | -0.98 | 3.54E-03 | 0.0150 |
| LINC02057        | -0.98 | 2.14E-02 | 0.0484 |
| GABPB1-IT1       | -0.98 | 5.13E-03 | 0.0188 |
| ACTR3C           | -0.98 | 5.35E-03 | 0.0192 |
| EFCAB5           | -0.98 | 5.27E-03 | 0.0190 |
| JAK1             | -0.98 | 2.54E-03 | 0.0126 |
| IQCF3            | -0.99 | 6.90E-03 | 0.0226 |
| BAZ2B            | -0.99 | 1.62E-02 | 0.0396 |
| ENST000002444260 | -0.99 | 5.84E-03 | 0.0203 |
| PCCA             | -0.99 | 1.89E-03 | 0.0106 |
| ENST000002621890 | -0.99 | 1.52E-03 | 0.0095 |
| AL080250.1       | -0.99 | 7.49E-03 | 0.0237 |
| TBCK             | -0.99 | 2.48E-03 | 0.0124 |
| AC134349.1       | -0.99 | 1.22E-02 | 0.0327 |
| AC134349.4       | -0.99 | 1.22E-02 | 0.0327 |
| AC245078.2       | -0.99 | 1.22E-02 | 0.0327 |
| ENST000002889851 | -0.99 | 8.06E-03 | 0.0249 |
| MPC1             | -0.99 | 7.41E-03 | 0.0235 |
| TRPM8            | -0.99 | 1.43E-02 | 0.0363 |
| LRRK1            | -0.99 | 1.86E-02 | 0.0439 |
| FLI1             | -0.99 | 2.59E-03 | 0.0127 |
| AGO3             | -0.99 | 1.47E-03 | 0.0093 |

|                  |       |          |        |
|------------------|-------|----------|--------|
| VASH1-AS1        | -0.99 | 7.93E-03 | 0.0246 |
| RF00017.127      | -0.99 | 2.17E-02 | 0.0489 |
| TIGD1            | -0.99 | 1.36E-03 | 0.0089 |
| LTO1             | -0.99 | 1.96E-03 | 0.0108 |
| LFNG             | -0.99 | 2.12E-02 | 0.0481 |
| STX5             | -0.99 | 5.11E-03 | 0.0187 |
| EPC2             | -0.99 | 5.65E-03 | 0.0199 |
| AC114980.1       | -0.99 | 1.17E-02 | 0.0318 |
| AC009061.2       | -0.99 | 1.14E-02 | 0.0311 |
| C5orf17          | -0.99 | 1.36E-02 | 0.0350 |
| AC087286.4       | -0.99 | 7.03E-03 | 0.0229 |
| PTAR1            | -0.99 | 1.52E-03 | 0.0095 |
| AL049874.3       | -0.99 | 2.21E-02 | 0.0496 |
| ENST000002420670 | -0.99 | 7.94E-03 | 0.0247 |
| TRAJ40           | -0.99 | 9.48E-03 | 0.0275 |
| GABRE            | -0.99 | 1.52E-02 | 0.0379 |
| HERPUD2          | -0.99 | 4.84E-03 | 0.0181 |
| ZC3H12B          | -0.99 | 7.54E-03 | 0.0238 |
| AC009948.2       | -0.99 | 6.90E-03 | 0.0226 |
| CCDC169          | -0.99 | 5.16E-03 | 0.0188 |
| GPLD1            | -0.99 | 1.04E-02 | 0.0293 |
| CDK11A           | -0.99 | 1.87E-03 | 0.0106 |
| TMX4             | -1.00 | 3.14E-03 | 0.0140 |
| PRDM5            | -1.00 | 4.74E-03 | 0.0179 |
| ENST000003130401 | -1.00 | 1.37E-02 | 0.0353 |
| AC061975.1       | -1.00 | 1.89E-02 | 0.0443 |
| PARP11           | -1.00 | 3.89E-03 | 0.0159 |
| TOB1             | -1.00 | 1.80E-03 | 0.0103 |
| CARD8            | -1.00 | 1.48E-03 | 0.0093 |
| SGSM3            | -1.00 | 3.60E-03 | 0.0152 |
| ENST000003269250 | -1.00 | 9.42E-03 | 0.0274 |
| RFX3             | -1.00 | 1.62E-03 | 0.0098 |
| ENST000003668550 | -1.00 | 3.58E-03 | 0.0151 |
| RWDD2A           | -1.00 | 1.61E-02 | 0.0395 |
| FBXW4            | -1.00 | 2.58E-03 | 0.0127 |
| MBTPS1           | -1.00 | 5.40E-03 | 0.0194 |
| AC011726.2       | -1.00 | 8.87E-03 | 0.0264 |
| ENST000003140280 | -1.00 | 1.88E-02 | 0.0441 |
| AC027288.3       | -1.00 | 4.21E-03 | 0.0167 |
| GOLGA6L5P        | -1.00 | 2.08E-02 | 0.0475 |
| DDR1-DT          | -1.00 | 3.45E-03 | 0.0148 |
| PDXDC2P-NPIP14P  | -1.00 | 1.40E-02 | 0.0359 |
| ASH1L            | -1.00 | 1.90E-03 | 0.0106 |
| CALN1            | -1.00 | 1.30E-02 | 0.0339 |
| RRAGB            | -1.00 | 4.39E-03 | 0.0171 |
| ENST000003530470 | -1.01 | 5.59E-03 | 0.0198 |
| ZNF354B          | -1.01 | 7.04E-03 | 0.0229 |
| SFTPD-AS1        | -1.01 | 1.10E-02 | 0.0304 |
| ZNF264           | -1.01 | 3.98E-03 | 0.0161 |
| TRAPPC6A         | -1.01 | 7.98E-03 | 0.0247 |

|                  |       |          |        |
|------------------|-------|----------|--------|
| GALR1            | -1.01 | 8.15E-03 | 0.0251 |
| AC092474.1       | -1.01 | 9.26E-03 | 0.0271 |
| ENST000003408550 | -1.01 | 5.13E-03 | 0.0188 |
| ENST000002496360 | -1.01 | 1.41E-03 | 0.0091 |
| RENBP            | -1.01 | 1.22E-02 | 0.0326 |
| ADCY2            | -1.01 | 1.13E-02 | 0.0311 |
| UBAP1L           | -1.01 | 5.48E-03 | 0.0195 |
| AP002490.1       | -1.01 | 1.89E-02 | 0.0443 |
| ENST000002949522 | -1.01 | 1.83E-02 | 0.0434 |
| ADCY7            | -1.01 | 1.77E-03 | 0.0102 |
| ENST000002880710 | -1.01 | 1.55E-02 | 0.0385 |
| AL121652.1       | -1.01 | 1.54E-02 | 0.0383 |
| ITGA9-AS1        | -1.01 | 2.06E-02 | 0.0472 |
| DLGAP1-AS2       | -1.01 | 4.01E-03 | 0.0162 |
| RRN3P3           | -1.01 | 4.91E-03 | 0.0183 |
| ZNF483           | -1.01 | 8.29E-03 | 0.0253 |
| ARRDC3-AS1       | -1.01 | 6.76E-03 | 0.0223 |
| SAG              | -1.01 | 8.37E-03 | 0.0255 |
| NAGPA-AS1        | -1.01 | 1.20E-02 | 0.0323 |
| ENST000003361281 | -1.01 | 1.30E-02 | 0.0340 |
| PRRC2B           | -1.01 | 1.06E-02 | 0.0297 |
| RN7SL711P        | -1.01 | 1.06E-02 | 0.0297 |
| SRP14-AS1        | -1.01 | 8.49E-03 | 0.0257 |
| NSD3             | -1.02 | 1.82E-03 | 0.0104 |
| MORC2            | -1.02 | 1.89E-03 | 0.0106 |
| AL139385.1       | -1.02 | 5.63E-03 | 0.0198 |
| ENST000002704600 | -1.02 | 6.97E-03 | 0.0228 |
| IPO5P1           | -1.02 | 2.54E-03 | 0.0125 |
| AL683813.1       | -1.02 | 4.01E-03 | 0.0162 |
| FLCN             | -1.02 | 4.64E-03 | 0.0177 |
| ACSM2B           | -1.02 | 4.59E-03 | 0.0176 |
| AP000662.1       | -1.02 | 6.85E-03 | 0.0225 |
| RIPK1            | -1.02 | 1.31E-03 | 0.0087 |
| LINC01206        | -1.02 | 1.58E-02 | 0.0390 |
| DGKD             | -1.02 | 2.35E-03 | 0.0121 |
| ZNF619           | -1.02 | 4.56E-03 | 0.0175 |
| AC005041.1       | -1.02 | 4.93E-03 | 0.0183 |
| AC023389.2       | -1.02 | 1.96E-02 | 0.0455 |
| MROH1            | -1.02 | 4.90E-03 | 0.0182 |
| PLXNA3           | -1.02 | 8.89E-03 | 0.0265 |
| AC087284.1       | -1.02 | 2.14E-02 | 0.0484 |
| RAPGEF6          | -1.02 | 3.54E-03 | 0.0150 |
| ASTN2            | -1.02 | 3.51E-03 | 0.0149 |
| TRAJ31           | -1.02 | 5.86E-03 | 0.0204 |
| AC092902.4       | -1.02 | 4.82E-03 | 0.0181 |
| AC010601.1       | -1.02 | 1.02E-02 | 0.0290 |
| SNX16            | -1.02 | 1.47E-02 | 0.0370 |
| AL159169.2       | -1.03 | 1.59E-02 | 0.0391 |
| GPCPD1           | -1.03 | 2.50E-03 | 0.0124 |
| AHNAK            | -1.03 | 4.23E-03 | 0.0167 |

|                  |       |          |        |
|------------------|-------|----------|--------|
| OR111            | -1.03 | 3.55E-03 | 0.0150 |
| ENST000002630950 | -1.03 | 3.85E-03 | 0.0158 |
| CROT             | -1.03 | 1.94E-03 | 0.0107 |
| ENST000003180102 | -1.03 | 3.65E-03 | 0.0153 |
| RETREG3          | -1.03 | 2.06E-03 | 0.0111 |
| LRRC37A2         | -1.03 | 3.61E-03 | 0.0152 |
| CRY2             | -1.03 | 2.64E-03 | 0.0128 |
| LINC00652        | -1.03 | 1.33E-02 | 0.0345 |
| AC245060.6       | -1.03 | 5.12E-03 | 0.0187 |
| CHP2             | -1.03 | 5.20E-03 | 0.0189 |
| NPIP13           | -1.03 | 6.27E-03 | 0.0212 |
| AP000704.1       | -1.03 | 1.96E-02 | 0.0455 |
| LRRC69           | -1.03 | 4.05E-03 | 0.0162 |
| AC015871.3       | -1.03 | 4.31E-03 | 0.0169 |
| PRDM2            | -1.03 | 4.36E-03 | 0.0170 |
| RPS27            | -1.03 | 2.28E-03 | 0.0118 |
| ULK1             | -1.03 | 8.22E-03 | 0.0252 |
| P4HTM            | -1.03 | 6.70E-03 | 0.0222 |
| IQCH-AS1         | -1.03 | 3.13E-03 | 0.0140 |
| AC005899.6       | -1.03 | 1.35E-02 | 0.0349 |
| ENST000003164913 | -1.03 | 7.90E-03 | 0.0246 |
| YLPM1            | -1.03 | 1.38E-03 | 0.0090 |
| LINC01232        | -1.03 | 3.70E-03 | 0.0154 |
| STYX             | -1.04 | 1.36E-03 | 0.0089 |
| ZNF157           | -1.04 | 1.89E-02 | 0.0443 |
| AL807752.1       | -1.04 | 1.92E-02 | 0.0449 |
| ENST000003357273 | -1.04 | 9.16E-03 | 0.0269 |
| CFL1P1           | -1.04 | 1.17E-02 | 0.0317 |
| LMF1             | -1.04 | 1.52E-02 | 0.0379 |
| ENST000002994270 | -1.04 | 1.04E-02 | 0.0293 |
| ENST000003006191 | -1.04 | 2.08E-03 | 0.0112 |
| ENST000002194780 | -1.04 | 3.11E-03 | 0.0140 |
| KCNQ1            | -1.04 | 7.23E-03 | 0.0232 |
| PPP3CA           | -1.04 | 1.78E-03 | 0.0103 |
| ZNRF2            | -1.04 | 5.48E-03 | 0.0195 |
| CAT              | -1.04 | 8.56E-03 | 0.0258 |
| MIA2             | -1.04 | 1.39E-03 | 0.0090 |
| LINC00847        | -1.04 | 3.67E-03 | 0.0153 |
| IGSF9B           | -1.04 | 3.17E-03 | 0.0141 |
| KIAA1109         | -1.04 | 1.11E-03 | 0.0081 |
| CYP3A5           | -1.04 | 7.07E-03 | 0.0229 |
| NDRG1            | -1.04 | 4.98E-03 | 0.0184 |
| AC008969.1       | -1.04 | 8.47E-03 | 0.0257 |
| XKR8             | -1.04 | 1.17E-02 | 0.0318 |
| RFFL             | -1.04 | 2.44E-03 | 0.0123 |
| SYNJ1            | -1.04 | 7.12E-03 | 0.0230 |
| TMEM212          | -1.04 | 2.89E-03 | 0.0135 |
| TRAJ10           | -1.04 | 6.08E-03 | 0.0208 |
| ENST000003071380 | -1.04 | 2.35E-03 | 0.0121 |
| USP20            | -1.04 | 4.03E-03 | 0.0162 |

|                  |       |          |        |
|------------------|-------|----------|--------|
| AC073569.3       | -1.04 | 5.52E-03 | 0.0196 |
| HDAC10           | -1.04 | 2.10E-02 | 0.0478 |
| AC092431.2       | -1.04 | 1.80E-02 | 0.0428 |
| TRBV27           | -1.05 | 1.92E-02 | 0.0448 |
| SCAMP2           | -1.05 | 8.88E-03 | 0.0264 |
| CARMN            | -1.05 | 2.06E-02 | 0.0472 |
| OR10H1           | -1.05 | 1.12E-02 | 0.0309 |
| AC139887.2       | -1.05 | 6.50E-03 | 0.0218 |
| CNN2             | -1.05 | 1.25E-02 | 0.0332 |
| DGKQ             | -1.05 | 1.56E-02 | 0.0387 |
| LINC01238        | -1.05 | 3.79E-03 | 0.0157 |
| NOTCH2NLA        | -1.05 | 3.12E-03 | 0.0140 |
| AC006145.1       | -1.05 | 3.73E-03 | 0.0155 |
| HERC2P2          | -1.05 | 1.40E-03 | 0.0090 |
| PRH1             | -1.05 | 1.51E-02 | 0.0378 |
| AC007038.2       | -1.05 | 5.44E-03 | 0.0194 |
| MAPK10           | -1.05 | 1.63E-03 | 0.0098 |
| GHET1            | -1.05 | 5.06E-03 | 0.0186 |
| OLMALINC         | -1.05 | 2.77E-03 | 0.0132 |
| ENST000003172211 | -1.05 | 3.30E-03 | 0.0144 |
| ENST000002628110 | -1.05 | 3.17E-03 | 0.0141 |
| ENST000002662541 | -1.05 | 2.19E-02 | 0.0493 |
| MARK2            | -1.05 | 4.07E-03 | 0.0163 |
| ENST000003386371 | -1.05 | 4.72E-03 | 0.0178 |
| AC008764.8       | -1.05 | 1.10E-02 | 0.0304 |
| TRIML2           | -1.05 | 1.58E-02 | 0.0391 |
| TBC1D10C         | -1.05 | 7.58E-03 | 0.0239 |
| CLSTN1           | -1.05 | 2.12E-03 | 0.0113 |
| IL16             | -1.05 | 1.06E-02 | 0.0297 |
| FAM120C          | -1.05 | 9.94E-03 | 0.0285 |
| LINC02073        | -1.05 | 5.17E-03 | 0.0188 |
| RNF216P1         | -1.05 | 7.73E-03 | 0.0242 |
| AC093591.2       | -1.05 | 1.90E-02 | 0.0444 |
| PQLC3            | -1.05 | 2.71E-03 | 0.0130 |
| ARHGAP1          | -1.05 | 1.54E-02 | 0.0383 |
| ZNF510           | -1.05 | 1.34E-03 | 0.0088 |
| ZNF18            | -1.06 | 2.23E-03 | 0.0117 |
| AC011933.2       | -1.06 | 4.30E-03 | 0.0169 |
| ZDHHC2           | -1.06 | 1.59E-02 | 0.0392 |
| AL513314.2       | -1.06 | 2.12E-02 | 0.0481 |
| SMARCE1P1        | -1.06 | 5.37E-03 | 0.0193 |
| EIF1B-AS1        | -1.06 | 1.20E-02 | 0.0322 |
| SGSM2            | -1.06 | 5.61E-03 | 0.0198 |
| MIPOL1           | -1.06 | 1.93E-03 | 0.0107 |
| ZNF667-AS1       | -1.06 | 3.89E-03 | 0.0159 |
| NDUFA6-DT        | -1.06 | 4.08E-03 | 0.0163 |
| TUT1             | -1.06 | 8.82E-03 | 0.0263 |
| AP000708.1       | -1.06 | 2.15E-02 | 0.0486 |
| ZNF236           | -1.06 | 6.23E-03 | 0.0212 |
| HIP1R            | -1.06 | 7.10E-03 | 0.0230 |

|                  |       |          |        |
|------------------|-------|----------|--------|
| FBLN1            | -1.06 | 1.20E-02 | 0.0322 |
| ODF2L            | -1.06 | 1.10E-03 | 0.0080 |
| PHYKPL           | -1.06 | 1.11E-03 | 0.0080 |
| OTUD1            | -1.06 | 5.30E-03 | 0.0191 |
| AC008079.1       | -1.06 | 3.88E-03 | 0.0159 |
| TSC1             | -1.06 | 3.64E-03 | 0.0153 |
| SNRPN            | -1.06 | 1.52E-03 | 0.0095 |
| LINC02246        | -1.06 | 1.08E-02 | 0.0301 |
| ZBTB49           | -1.06 | 1.20E-02 | 0.0322 |
| LINC01684        | -1.06 | 1.58E-03 | 0.0097 |
| FAM78A           | -1.06 | 1.57E-03 | 0.0096 |
| AC135050.1       | -1.06 | 1.22E-02 | 0.0327 |
| ZNF10            | -1.06 | 8.46E-03 | 0.0257 |
| TRAV1-1          | -1.06 | 2.21E-02 | 0.0496 |
| CD302            | -1.06 | 1.04E-02 | 0.0294 |
| LIPT1            | -1.06 | 4.83E-03 | 0.0181 |
| 37226            | -1.06 | 4.65E-03 | 0.0177 |
| RAD21-AS1        | -1.06 | 1.80E-02 | 0.0428 |
| AP003175.1       | -1.06 | 1.88E-02 | 0.0441 |
| ZZEF1            | -1.06 | 2.26E-03 | 0.0118 |
| ZNF782           | -1.06 | 3.44E-03 | 0.0148 |
| AC124016.2       | -1.07 | 1.01E-02 | 0.0288 |
| PDE4DIP          | -1.07 | 3.95E-03 | 0.0160 |
| SCRG1            | -1.07 | 8.53E-03 | 0.0258 |
| ARIH2OS          | -1.07 | 1.25E-02 | 0.0332 |
| IZUMO1           | -1.07 | 1.67E-02 | 0.0405 |
| SARAF            | -1.07 | 8.56E-03 | 0.0258 |
| NPIP5            | -1.07 | 1.08E-02 | 0.0301 |
| AL139353.1       | -1.07 | 1.64E-02 | 0.0400 |
| NUP50-DT         | -1.07 | 2.16E-02 | 0.0488 |
| LINC00663        | -1.07 | 7.79E-03 | 0.0243 |
| NOP53            | -1.07 | 2.55E-03 | 0.0126 |
| CLEC19A          | -1.07 | 1.17E-02 | 0.0318 |
| HMG1P8           | -1.07 | 9.05E-03 | 0.0267 |
| MFSD8            | -1.07 | 1.40E-03 | 0.0091 |
| AP000542.2       | -1.07 | 4.82E-03 | 0.0181 |
| TRAJ36           | -1.07 | 2.03E-02 | 0.0467 |
| GGT5             | -1.07 | 1.65E-02 | 0.0402 |
| UBE2Q2           | -1.07 | 1.99E-03 | 0.0109 |
| PATL2            | -1.07 | 1.97E-02 | 0.0456 |
| AC139494.1       | -1.07 | 1.59E-02 | 0.0393 |
| NFRKB            | -1.07 | 1.42E-03 | 0.0091 |
| GALC             | -1.07 | 2.38E-03 | 0.0121 |
| BTBD8            | -1.07 | 5.29E-03 | 0.0191 |
| VCP1P1           | -1.07 | 3.52E-03 | 0.0150 |
| RF00017.35       | -1.07 | 1.75E-02 | 0.0419 |
| ENST000003412490 | -1.07 | 1.01E-02 | 0.0288 |
| AC093323.1       | -1.07 | 2.24E-03 | 0.0117 |
| GNRHR2           | -1.07 | 1.24E-02 | 0.0330 |
| ST6GAL1          | -1.08 | 1.31E-03 | 0.0087 |

|                  |       |          |        |
|------------------|-------|----------|--------|
| SMCHD1           | -1.08 | 5.24E-03 | 0.0190 |
| ARL2BP           | -1.08 | 4.41E-03 | 0.0172 |
| SLC25A25-AS1     | -1.08 | 3.16E-03 | 0.0141 |
| BEX2             | -1.08 | 1.28E-02 | 0.0336 |
| ANKRD36B         | -1.08 | 5.17E-03 | 0.0188 |
| HMGB3P4          | -1.08 | 1.71E-02 | 0.0411 |
| CD44             | -1.08 | 6.42E-03 | 0.0216 |
| LRCH4            | -1.08 | 1.88E-02 | 0.0442 |
| AC004918.1       | -1.08 | 1.17E-02 | 0.0318 |
| AC004918.2       | -1.08 | 1.17E-02 | 0.0318 |
| ZNF677           | -1.08 | 1.00E-02 | 0.0286 |
| IRF2             | -1.08 | 2.91E-03 | 0.0135 |
| N4BP2L2          | -1.08 | 1.20E-03 | 0.0084 |
| NMI              | -1.08 | 2.36E-03 | 0.0121 |
| GATAD2B          | -1.08 | 1.60E-03 | 0.0098 |
| UBA7             | -1.08 | 3.48E-03 | 0.0149 |
| PHACTR3          | -1.08 | 5.90E-03 | 0.0204 |
| LINC01579        | -1.08 | 1.07E-02 | 0.0300 |
| TRIM14           | -1.08 | 7.48E-03 | 0.0237 |
| NLRC5            | -1.08 | 4.79E-03 | 0.0180 |
| AC004817.4       | -1.08 | 5.78E-03 | 0.0202 |
| ENST000002441740 | -1.08 | 5.62E-03 | 0.0198 |
| SERINC1          | -1.08 | 1.20E-03 | 0.0084 |
| ZNF398           | -1.08 | 1.73E-03 | 0.0101 |
| ZNF417           | -1.08 | 5.53E-03 | 0.0196 |
| CCDC80           | -1.08 | 3.29E-03 | 0.0144 |
| ADAM19           | -1.08 | 1.39E-02 | 0.0357 |
| RNF44            | -1.08 | 3.74E-03 | 0.0155 |
| IGSF6            | -1.09 | 1.87E-02 | 0.0441 |
| ENST000002640651 | -1.09 | 1.04E-03 | 0.0079 |
| CDH12            | -1.09 | 5.76E-03 | 0.0202 |
| COLCA1           | -1.09 | 1.39E-02 | 0.0356 |
| RUSC1-AS1        | -1.09 | 2.12E-02 | 0.0482 |
| AC009053.1       | -1.09 | 3.01E-03 | 0.0137 |
| SPIN2B           | -1.09 | 4.96E-03 | 0.0184 |
| MARF1            | -1.09 | 1.66E-03 | 0.0100 |
| DENND2A          | -1.09 | 1.39E-02 | 0.0357 |
| ARHGAP26         | -1.09 | 1.46E-02 | 0.0369 |
| ENST000003130281 | -1.09 | 1.43E-02 | 0.0364 |
| FBXO24           | -1.09 | 1.67E-02 | 0.0405 |
| UGT1A1           | -1.09 | 4.20E-03 | 0.0166 |
| LPIN1            | -1.09 | 6.93E-03 | 0.0227 |
| TRAJ41           | -1.09 | 6.10E-03 | 0.0209 |
| ENST000003221531 | -1.09 | 1.03E-02 | 0.0292 |
| AL590867.1       | -1.09 | 8.34E-03 | 0.0254 |
| PWWP2B           | -1.09 | 1.61E-02 | 0.0394 |
| RANBP17          | -1.09 | 9.27E-03 | 0.0271 |
| NSUN5P1          | -1.09 | 1.43E-03 | 0.0092 |
| SCHLAP1          | -1.09 | 7.37E-03 | 0.0235 |
| LINC01761        | -1.09 | 4.25E-03 | 0.0168 |

|                 |       |          |        |
|-----------------|-------|----------|--------|
| BTD             | -1.09 | 4.14E-03 | 0.0165 |
| PRR4            | -1.09 | 1.02E-02 | 0.0289 |
| APOL6           | -1.09 | 1.10E-02 | 0.0304 |
| FAM13B          | -1.09 | 1.28E-03 | 0.0087 |
| PLEKHA8P1       | -1.09 | 1.95E-02 | 0.0453 |
| N4BP2L1         | -1.10 | 5.23E-03 | 0.0190 |
| BCL11B          | -1.10 | 4.69E-03 | 0.0178 |
| AC127070.2      | -1.10 | 6.76E-03 | 0.0223 |
| ATF7IP          | -1.10 | 1.14E-02 | 0.0313 |
| PCED1B-AS1      | -1.10 | 3.94E-03 | 0.0160 |
| ATP6V1G1        | -1.10 | 1.62E-03 | 0.0098 |
| KIAA0040        | -1.10 | 1.18E-02 | 0.0320 |
| NAP1L2          | -1.10 | 5.85E-03 | 0.0204 |
| AC078846.1      | -1.10 | 8.38E-03 | 0.0255 |
| LINC00939       | -1.10 | 4.45E-03 | 0.0172 |
| SZT2            | -1.10 | 1.28E-03 | 0.0086 |
| AC139530.1      | -1.10 | 1.29E-02 | 0.0339 |
| TULP4           | -1.10 | 1.14E-03 | 0.0081 |
| ATF6B           | -1.10 | 4.17E-03 | 0.0166 |
| TTC39B          | -1.10 | 7.77E-03 | 0.0243 |
| ERVK13-1        | -1.10 | 1.67E-03 | 0.0100 |
| IFFO1           | -1.10 | 1.92E-03 | 0.0107 |
| LINC00843       | -1.10 | 1.38E-02 | 0.0355 |
| ZMYND11         | -1.10 | 1.52E-03 | 0.0095 |
| LINC01128       | -1.10 | 1.42E-03 | 0.0091 |
| Z95114.1        | -1.10 | 5.19E-03 | 0.0189 |
| NECAP1          | -1.10 | 2.29E-03 | 0.0119 |
| ZDHHC15         | -1.10 | 1.26E-02 | 0.0333 |
| SLC30A1         | -1.10 | 3.43E-03 | 0.0147 |
| HLA-DQA1        | -1.10 | 2.43E-03 | 0.0123 |
| MYLIP           | -1.10 | 7.21E-03 | 0.0231 |
| TNIK            | -1.10 | 6.60E-03 | 0.0220 |
| IGFL4           | -1.10 | 7.79E-03 | 0.0243 |
| GKAP1           | -1.10 | 6.86E-03 | 0.0225 |
| SECISBP2L       | -1.10 | 9.25E-03 | 0.0271 |
| AC016582.3      | -1.10 | 1.18E-02 | 0.0320 |
| AP001992.1      | -1.11 | 1.94E-02 | 0.0451 |
| ENST00000641520 | -1.11 | 6.41E-03 | 0.0216 |
| ZNF570          | -1.11 | 3.02E-03 | 0.0137 |
| AL606760.3      | -1.11 | 4.81E-03 | 0.0180 |
| AC253576.2      | -1.11 | 1.17E-02 | 0.0317 |
| ABCC9           | -1.11 | 3.16E-03 | 0.0141 |
| SLC35F6         | -1.11 | 4.69E-03 | 0.0178 |
| HMG2P28         | -1.11 | 1.37E-02 | 0.0354 |
| ZNF578          | -1.11 | 5.56E-03 | 0.0197 |
| PCSK7           | -1.11 | 1.09E-03 | 0.0080 |
| AP000347.1      | -1.11 | 6.54E-03 | 0.0218 |
| OCEL1           | -1.11 | 8.89E-03 | 0.0265 |
| TBX19           | -1.11 | 1.39E-02 | 0.0356 |
| C2CD3           | -1.11 | 2.23E-03 | 0.0117 |

|                  |       |          |        |
|------------------|-------|----------|--------|
| RHBDF2           | -1.11 | 3.12E-03 | 0.0140 |
| AC019131.2       | -1.11 | 1.48E-02 | 0.0371 |
| AC022893.1       | -1.11 | 6.96E-03 | 0.0227 |
| ZNF585A          | -1.11 | 1.68E-03 | 0.0100 |
| ORAI1            | -1.11 | 1.25E-02 | 0.0331 |
| MAP2K5           | -1.11 | 2.79E-03 | 0.0132 |
| AC117529.2       | -1.11 | 9.79E-03 | 0.0282 |
| ENST000002175150 | -1.11 | 1.07E-02 | 0.0298 |
| EPB41L4A         | -1.11 | 1.35E-02 | 0.0350 |
| CLN5             | -1.11 | 1.03E-03 | 0.0078 |
| LY96             | -1.11 | 5.34E-03 | 0.0192 |
| AC008115.4       | -1.11 | 3.43E-03 | 0.0147 |
| NTRK3            | -1.11 | 1.44E-02 | 0.0366 |
| MTHFD2P1         | -1.11 | 8.84E-03 | 0.0264 |
| AC098820.1       | -1.11 | 7.98E-03 | 0.0247 |
| AC007495.1       | -1.11 | 9.48E-03 | 0.0275 |
| SKIL             | -1.11 | 1.43E-03 | 0.0091 |
| ADAM32           | -1.12 | 1.11E-03 | 0.0080 |
| ENST000002961350 | -1.12 | 1.51E-02 | 0.0378 |
| RALGPS1          | -1.12 | 8.13E-03 | 0.0250 |
| AL138899.1       | -1.12 | 3.67E-03 | 0.0153 |
| AC121333.1       | -1.12 | 5.98E-03 | 0.0206 |
| ENST00000639970  | -1.12 | 1.23E-03 | 0.0085 |
| DOCK2            | -1.12 | 7.08E-03 | 0.0229 |
| AP001107.1       | -1.12 | 9.68E-03 | 0.0280 |
| NKTR             | -1.12 | 1.00E-03 | 0.0077 |
| AL137782.1       | -1.12 | 7.95E-03 | 0.0247 |
| KCNMB4           | -1.12 | 1.90E-02 | 0.0444 |
| RN7SL744P        | -1.12 | 7.28E-03 | 0.0233 |
| TMEM106B         | -1.12 | 2.60E-03 | 0.0127 |
| ENST00000640587  | -1.12 | 1.29E-03 | 0.0087 |
| BAIAP2-DT        | -1.12 | 3.48E-03 | 0.0149 |
| AL391825.1       | -1.12 | 8.73E-03 | 0.0262 |
| OR4K17           | -1.12 | 2.04E-02 | 0.0468 |
| BMPR2            | -1.12 | 3.00E-03 | 0.0137 |
| AL022344.1       | -1.12 | 5.87E-03 | 0.0204 |
| ABCD1            | -1.12 | 9.88E-03 | 0.0284 |
| SBF1             | -1.12 | 2.85E-03 | 0.0134 |
| FAM129C          | -1.12 | 4.02E-03 | 0.0162 |
| AL080317.2       | -1.12 | 9.23E-03 | 0.0271 |
| AC090912.2       | -1.12 | 1.90E-02 | 0.0444 |
| SLITRK5          | -1.12 | 9.70E-03 | 0.0280 |
| TMUB2            | -1.12 | 8.71E-03 | 0.0261 |
| AC006262.1       | -1.12 | 1.50E-02 | 0.0376 |
| AC022540.1       | -1.12 | 6.20E-03 | 0.0211 |
| PTCHD1           | -1.12 | 6.68E-03 | 0.0222 |
| AL355482.1       | -1.12 | 3.57E-03 | 0.0151 |
| CCDC97           | -1.13 | 4.54E-03 | 0.0175 |
| FBXL2            | -1.13 | 4.61E-03 | 0.0176 |
| AC004967.1       | -1.13 | 1.36E-02 | 0.0352 |

|                  |       |          |        |
|------------------|-------|----------|--------|
| TSIX             | -1.13 | 1.13E-03 | 0.0081 |
| LCN15            | -1.13 | 5.26E-03 | 0.0190 |
| VCL              | -1.13 | 2.41E-03 | 0.0122 |
| EML1             | -1.13 | 1.54E-02 | 0.0383 |
| AC008764.6       | -1.13 | 1.20E-02 | 0.0323 |
| DHRS12           | -1.13 | 6.02E-03 | 0.0207 |
| TTC22            | -1.13 | 9.53E-03 | 0.0276 |
| AC124312.5       | -1.13 | 3.16E-03 | 0.0141 |
| AC006141.1       | -1.13 | 1.70E-03 | 0.0101 |
| AC009135.1       | -1.13 | 4.58E-03 | 0.0176 |
| RNA5SP281        | -1.13 | 2.08E-02 | 0.0475 |
| LIFR-AS1         | -1.13 | 3.84E-03 | 0.0158 |
| AL137058.2       | -1.13 | 1.29E-02 | 0.0339 |
| MS4A2            | -1.13 | 1.35E-02 | 0.0349 |
| FO393401.1       | -1.13 | 1.63E-02 | 0.0398 |
| HYKK             | -1.13 | 3.19E-03 | 0.0141 |
| AC069222.1       | -1.13 | 9.83E-03 | 0.0283 |
| RELCH            | -1.13 | 8.19E-04 | 0.0070 |
| LINC01949        | -1.13 | 3.29E-03 | 0.0144 |
| WARS2-IT1        | -1.13 | 1.60E-03 | 0.0098 |
| CCDC66           | -1.13 | 1.47E-03 | 0.0093 |
| AL158064.1       | -1.13 | 1.70E-03 | 0.0101 |
| ACAP2            | -1.13 | 3.93E-03 | 0.0160 |
| AC106886.5       | -1.13 | 7.18E-03 | 0.0231 |
| PGBD2            | -1.13 | 2.12E-03 | 0.0113 |
| P2RX4            | -1.13 | 4.11E-03 | 0.0164 |
| LIN37            | -1.13 | 8.49E-03 | 0.0257 |
| AKR1B15          | -1.13 | 1.06E-02 | 0.0298 |
| OR2A1-AS1        | -1.13 | 1.24E-02 | 0.0330 |
| VPS13B           | -1.13 | 9.40E-04 | 0.0075 |
| AC068790.5       | -1.13 | 1.85E-02 | 0.0436 |
| ZFP36L2          | -1.14 | 3.25E-03 | 0.0143 |
| BCLAF3           | -1.14 | 2.14E-02 | 0.0484 |
| KIZ              | -1.14 | 1.24E-03 | 0.0085 |
| ARSA             | -1.14 | 6.05E-03 | 0.0208 |
| AC009120.2       | -1.14 | 2.02E-03 | 0.0110 |
| WRAP73           | -1.14 | 4.80E-03 | 0.0180 |
| AC093423.2       | -1.14 | 1.31E-02 | 0.0343 |
| RBMS1            | -1.14 | 1.03E-03 | 0.0078 |
| CYLD             | -1.14 | 2.62E-03 | 0.0128 |
| SMIM29           | -1.14 | 1.78E-02 | 0.0425 |
| LAPTM5           | -1.14 | 4.03E-03 | 0.0162 |
| PAFAH2           | -1.14 | 2.03E-03 | 0.0110 |
| FP325330.3       | -1.14 | 1.76E-02 | 0.0421 |
| OXR1             | -1.14 | 6.13E-03 | 0.0209 |
| AJ009632.2       | -1.14 | 1.69E-02 | 0.0408 |
| ZGPAT            | -1.14 | 8.77E-03 | 0.0262 |
| ENST000003173980 | -1.14 | 4.70E-03 | 0.0178 |
| LINC01268        | -1.14 | 9.42E-03 | 0.0274 |
| CPAMD8           | -1.14 | 4.35E-03 | 0.0170 |

|                  |       |          |        |
|------------------|-------|----------|--------|
| PRDM8            | -1.14 | 2.18E-02 | 0.0491 |
| VPS13D           | -1.14 | 4.26E-03 | 0.0168 |
| CASC15           | -1.14 | 8.46E-03 | 0.0257 |
| CPEB2            | -1.14 | 1.09E-03 | 0.0080 |
| LMBR1L           | -1.14 | 3.15E-03 | 0.0141 |
| AC109466.1       | -1.14 | 6.99E-03 | 0.0228 |
| TMEM45A          | -1.15 | 1.68E-03 | 0.0100 |
| KCNB1            | -1.15 | 7.48E-03 | 0.0237 |
| AC023051.1       | -1.15 | 4.81E-03 | 0.0180 |
| AC019117.1       | -1.15 | 6.76E-03 | 0.0223 |
| AC024075.1       | -1.15 | 8.34E-03 | 0.0254 |
| ENST000002832432 | -1.15 | 2.15E-02 | 0.0486 |
| ZMYM6            | -1.15 | 9.42E-04 | 0.0075 |
| AC109992.2       | -1.15 | 1.08E-02 | 0.0301 |
| TRAJ29           | -1.15 | 8.16E-03 | 0.0251 |
| CLEC2B           | -1.15 | 1.20E-02 | 0.0323 |
| ENST000002558820 | -1.15 | 9.22E-03 | 0.0271 |
| ZNF484           | -1.15 | 9.25E-04 | 0.0075 |
| AC016831.6       | -1.15 | 1.38E-02 | 0.0356 |
| ENST000003485130 | -1.15 | 2.62E-03 | 0.0128 |
| OCIAD2           | -1.15 | 7.63E-04 | 0.0068 |
| ENST000003739540 | -1.15 | 1.68E-03 | 0.0100 |
| PAG1             | -1.15 | 8.55E-03 | 0.0258 |
| AC239868.1       | -1.15 | 3.65E-03 | 0.0153 |
| NBPF9            | -1.15 | 1.16E-03 | 0.0082 |
| AC010168.2       | -1.15 | 2.01E-03 | 0.0110 |
| ANKRD36          | -1.15 | 8.73E-04 | 0.0072 |
| TMEM161B-AS1     | -1.15 | 2.57E-03 | 0.0126 |
| TESPA1           | -1.15 | 8.78E-04 | 0.0073 |
| DICER1-AS1       | -1.15 | 2.83E-03 | 0.0133 |
| BRWD1            | -1.15 | 1.16E-03 | 0.0082 |
| CGGBP1           | -1.15 | 1.41E-03 | 0.0091 |
| RGL2             | -1.15 | 3.39E-03 | 0.0146 |
| RCOR3            | -1.15 | 1.46E-03 | 0.0093 |
| PARVG            | -1.15 | 1.22E-02 | 0.0326 |
| GSTO2            | -1.15 | 1.36E-02 | 0.0351 |
| LINC00426        | -1.15 | 1.54E-02 | 0.0383 |
| RYR3             | -1.15 | 8.86E-03 | 0.0264 |
| ENST000002778740 | -1.15 | 1.52E-02 | 0.0379 |
| PLCD4            | -1.15 | 1.45E-02 | 0.0368 |
| AC012467.2       | -1.15 | 1.32E-02 | 0.0343 |
| STX17            | -1.16 | 1.12E-02 | 0.0308 |
| RHOH             | -1.16 | 8.85E-04 | 0.0073 |
| AC026150.1       | -1.16 | 1.86E-02 | 0.0438 |
| AC254960.1       | -1.16 | 1.86E-02 | 0.0438 |
| ASPRV1           | -1.16 | 1.98E-02 | 0.0458 |
| TLE4             | -1.16 | 5.53E-03 | 0.0196 |
| SYT12            | -1.16 | 1.60E-02 | 0.0393 |
| FAM66C           | -1.16 | 9.12E-03 | 0.0269 |
| RSF1-IT2         | -1.16 | 1.97E-02 | 0.0456 |

|                  |       |          |        |
|------------------|-------|----------|--------|
| PPIAP46          | -1.16 | 3.09E-03 | 0.0140 |
| CASZ1            | -1.16 | 1.80E-02 | 0.0428 |
| LENG8            | -1.16 | 2.28E-03 | 0.0118 |
| SPTLC3           | -1.16 | 4.53E-03 | 0.0174 |
| HSP90AB4P        | -1.16 | 4.73E-03 | 0.0179 |
| RASGRP1          | -1.16 | 5.78E-03 | 0.0202 |
| AC092747.4       | -1.16 | 4.84E-03 | 0.0181 |
| LINC01515        | -1.16 | 3.79E-03 | 0.0157 |
| DNAJC22          | -1.16 | 1.09E-02 | 0.0303 |
| BX004987.1       | -1.16 | 1.16E-02 | 0.0316 |
| R3HDM2           | -1.16 | 1.89E-03 | 0.0106 |
| APOBR            | -1.16 | 1.63E-02 | 0.0399 |
| ARHGAP4          | -1.16 | 1.87E-03 | 0.0105 |
| AL358334.2       | -1.16 | 2.08E-02 | 0.0474 |
| LINC01481        | -1.16 | 8.36E-03 | 0.0255 |
| KIR3DX1          | -1.16 | 8.91E-03 | 0.0265 |
| AKR7L            | -1.16 | 8.34E-03 | 0.0254 |
| CCDC191          | -1.16 | 6.99E-03 | 0.0228 |
| KIAA2012         | -1.16 | 1.73E-02 | 0.0415 |
| OR2T12           | -1.16 | 2.78E-03 | 0.0132 |
| ARHGAP5          | -1.16 | 2.36E-03 | 0.0121 |
| ZC3H6            | -1.16 | 1.38E-02 | 0.0354 |
| LINC01427        | -1.16 | 7.87E-03 | 0.0245 |
| TNRC6B           | -1.16 | 7.02E-04 | 0.0065 |
| AL157786.1       | -1.16 | 9.75E-03 | 0.0281 |
| OR2A5            | -1.16 | 3.09E-03 | 0.0140 |
| MLXIP            | -1.16 | 4.95E-03 | 0.0184 |
| TMEM175          | -1.17 | 3.16E-03 | 0.0141 |
| NBPF25P          | -1.17 | 3.11E-03 | 0.0140 |
| ENST000002985644 | -1.17 | 1.46E-02 | 0.0369 |
| AMZ2P1           | -1.17 | 1.08E-02 | 0.0300 |
| GLRX             | -1.17 | 1.95E-03 | 0.0108 |
| ENST000002528400 | -1.17 | 1.93E-03 | 0.0107 |
| TPGS1            | -1.17 | 9.41E-03 | 0.0274 |
| RPL21P135        | -1.17 | 1.35E-02 | 0.0350 |
| AC008267.2       | -1.17 | 1.96E-02 | 0.0455 |
| TRPM3            | -1.17 | 6.45E-03 | 0.0217 |
| GARS-DT          | -1.17 | 1.95E-03 | 0.0108 |
| STXBP5           | -1.17 | 2.52E-03 | 0.0125 |
| MAS1             | -1.17 | 1.81E-02 | 0.0430 |
| CCDC84           | -1.17 | 5.67E-03 | 0.0199 |
| AC145285.2       | -1.17 | 8.33E-03 | 0.0254 |
| ENST00000440190  | -1.17 | 1.03E-02 | 0.0291 |
| AC027514.1       | -1.17 | 7.27E-03 | 0.0233 |
| ZNF280D          | -1.17 | 4.03E-03 | 0.0162 |
| ENST00000606754  | -1.17 | 2.13E-02 | 0.0483 |
| AC007390.2       | -1.17 | 2.82E-03 | 0.0133 |
| AC017099.1       | -1.17 | 1.04E-03 | 0.0079 |
| AP5Z1            | -1.17 | 8.07E-03 | 0.0249 |
| ENST000002568580 | -1.17 | 5.27E-03 | 0.0190 |

|                  |       |          |        |
|------------------|-------|----------|--------|
| Z82217.1         | -1.17 | 3.82E-03 | 0.0157 |
| STIM2            | -1.17 | 2.02E-03 | 0.0110 |
| OFD1             | -1.17 | 2.58E-03 | 0.0126 |
| ZNF383           | -1.17 | 1.24E-03 | 0.0085 |
| ZNF362           | -1.17 | 7.24E-03 | 0.0232 |
| MIR4453HG        | -1.17 | 3.05E-03 | 0.0139 |
| LNCARSR          | -1.17 | 1.46E-02 | 0.0368 |
| OR2M3            | -1.17 | 1.52E-03 | 0.0095 |
| MTHFR            | -1.18 | 1.35E-03 | 0.0089 |
| ENST000002329782 | -1.18 | 4.31E-03 | 0.0169 |
| SNHG14           | -1.18 | 6.83E-04 | 0.0064 |
| ENST000003177750 | -1.18 | 1.35E-02 | 0.0350 |
| S100A4           | -1.18 | 5.94E-03 | 0.0205 |
| TMEM191C         | -1.18 | 1.25E-02 | 0.0331 |
| AC022762.2       | -1.18 | 1.45E-02 | 0.0367 |
| ENST000002511701 | -1.18 | 1.66E-02 | 0.0404 |
| SNURF            | -1.18 | 3.22E-03 | 0.0142 |
| HELQ             | -1.18 | 1.11E-03 | 0.0081 |
| LGSN             | -1.18 | 1.94E-02 | 0.0451 |
| TBC1D10A         | -1.18 | 1.52E-03 | 0.0095 |
| SERPINB9P1       | -1.18 | 6.22E-03 | 0.0211 |
| Z98755.1         | -1.18 | 1.06E-02 | 0.0297 |
| NDUFV2-AS1       | -1.18 | 9.97E-03 | 0.0285 |
| ZNF546           | -1.18 | 8.47E-04 | 0.0071 |
| AC124804.1       | -1.18 | 1.61E-02 | 0.0395 |
| TBC1D8B          | -1.18 | 3.17E-03 | 0.0141 |
| TTC16            | -1.18 | 5.90E-03 | 0.0204 |
| ZFAND2B          | -1.18 | 2.73E-03 | 0.0131 |
| AC107959.1       | -1.18 | 1.93E-02 | 0.0450 |
| THSD4            | -1.19 | 4.10E-03 | 0.0164 |
| ZNF471           | -1.19 | 1.18E-03 | 0.0083 |
| AC009137.2       | -1.19 | 4.86E-03 | 0.0181 |
| AL133520.1       | -1.19 | 1.62E-02 | 0.0397 |
| PCDHGA6          | -1.19 | 1.62E-02 | 0.0397 |
| RF00019.708      | -1.19 | 8.07E-03 | 0.0249 |
| AK3P3            | -1.19 | 1.61E-02 | 0.0395 |
| RF00017.190      | -1.19 | 7.55E-03 | 0.0238 |
| AC136475.1       | -1.19 | 1.64E-02 | 0.0399 |
| ZCWPW1           | -1.19 | 6.03E-03 | 0.0207 |
| AKAP13           | -1.19 | 1.90E-03 | 0.0106 |
| ARID1B           | -1.19 | 1.30E-03 | 0.0087 |
| TTC28-AS1        | -1.19 | 3.33E-03 | 0.0145 |
| ENST000002234590 | -1.19 | 9.71E-03 | 0.0280 |
| ATP10B           | -1.19 | 5.06E-03 | 0.0186 |
| INTS6-AS1        | -1.19 | 2.93E-03 | 0.0135 |
| PPP1R13B         | -1.19 | 7.19E-03 | 0.0231 |
| ENST000002964221 | -1.19 | 2.17E-02 | 0.0489 |
| TRAJ23           | -1.19 | 9.20E-03 | 0.0270 |
| DOCK11           | -1.19 | 1.89E-03 | 0.0106 |
| AC009961.1       | -1.19 | 3.51E-03 | 0.0149 |

|                  |       |          |        |
|------------------|-------|----------|--------|
| LHFPL5           | -1.19 | 2.63E-03 | 0.0128 |
| ANKRD12          | -1.20 | 1.17E-03 | 0.0083 |
| CAMK2G           | -1.20 | 1.71E-03 | 0.0101 |
| SNORA74B         | -1.20 | 9.82E-03 | 0.0283 |
| DNAH10OS         | -1.20 | 2.03E-02 | 0.0467 |
| AC009148.1       | -1.20 | 5.49E-03 | 0.0196 |
| ENST000003165090 | -1.20 | 1.03E-02 | 0.0290 |
| SULT1C2          | -1.20 | 1.93E-02 | 0.0450 |
| GAB2             | -1.20 | 2.21E-02 | 0.0496 |
| GABRG2           | -1.20 | 4.94E-03 | 0.0183 |
| AL031118.1       | -1.20 | 2.85E-03 | 0.0134 |
| MTMR3            | -1.20 | 3.65E-03 | 0.0153 |
| ENST00000492128  | -1.20 | 8.76E-03 | 0.0262 |
| MYBL1            | -1.20 | 3.81E-03 | 0.0157 |
| TRAJ6            | -1.20 | 3.45E-03 | 0.0148 |
| AC008840.1       | -1.20 | 1.69E-02 | 0.0408 |
| CTSC             | -1.20 | 7.17E-04 | 0.0065 |
| AP002812.5       | -1.20 | 1.00E-02 | 0.0286 |
| ENST000003098630 | -1.20 | 1.07E-02 | 0.0298 |
| AL731563.3       | -1.20 | 1.27E-02 | 0.0336 |
| WDR7             | -1.20 | 6.16E-04 | 0.0061 |
| TRIM13           | -1.20 | 6.16E-04 | 0.0061 |
| RN7SKP250        | -1.20 | 1.08E-02 | 0.0302 |
| AC135048.1       | -1.20 | 1.17E-02 | 0.0318 |
| AC009120.5       | -1.20 | 3.60E-03 | 0.0152 |
| ZNF846           | -1.20 | 3.03E-03 | 0.0138 |
| R3HDM4           | -1.20 | 3.12E-03 | 0.0140 |
| ENTPD4           | -1.20 | 1.31E-03 | 0.0087 |
| ATP8A1           | -1.20 | 2.33E-03 | 0.0120 |
| AC068338.2       | -1.20 | 7.19E-03 | 0.0231 |
| BTG1             | -1.20 | 4.58E-03 | 0.0176 |
| AC110716.2       | -1.20 | 2.23E-02 | 0.0499 |
| CSGALNACT2       | -1.21 | 1.94E-03 | 0.0107 |
| MANBA            | -1.21 | 1.29E-03 | 0.0087 |
| MBP              | -1.21 | 1.61E-03 | 0.0098 |
| SCARNA6          | -1.21 | 1.04E-02 | 0.0294 |
| RGS17P1          | -1.21 | 2.16E-02 | 0.0487 |
| AL645568.1       | -1.21 | 2.54E-03 | 0.0126 |
| NEK10            | -1.21 | 9.73E-03 | 0.0281 |
| ENST000003114591 | -1.21 | 1.85E-03 | 0.0105 |
| ZSWIM7           | -1.21 | 1.17E-02 | 0.0318 |
| AC008124.1       | -1.21 | 8.35E-03 | 0.0254 |
| TRAJ11           | -1.21 | 2.03E-02 | 0.0466 |
| KCNG4            | -1.21 | 9.91E-03 | 0.0284 |
| NAV1             | -1.21 | 4.78E-03 | 0.0180 |
| NMT2             | -1.21 | 3.20E-03 | 0.0142 |
| LO000005.1       | -1.21 | 1.84E-03 | 0.0105 |
| AP000873.4       | -1.21 | 1.70E-02 | 0.0410 |
| AL591684.2       | -1.21 | 1.58E-02 | 0.0389 |
| CAPN1            | -1.21 | 3.27E-03 | 0.0143 |

|                  |       |          |        |
|------------------|-------|----------|--------|
| AC104564.5       | -1.21 | 4.61E-03 | 0.0176 |
| LINC00933        | -1.21 | 2.23E-02 | 0.0499 |
| IQCM             | -1.21 | 5.56E-03 | 0.0197 |
| N6AMT1           | -1.21 | 2.13E-03 | 0.0114 |
| KDM7A            | -1.21 | 2.71E-03 | 0.0130 |
| RN7SL608P        | -1.21 | 9.78E-03 | 0.0282 |
| RN7SKP9          | -1.21 | 6.18E-03 | 0.0210 |
| C17orf100        | -1.21 | 2.57E-03 | 0.0126 |
| FLRT2            | -1.21 | 2.90E-03 | 0.0135 |
| ATG16L1          | -1.21 | 1.14E-03 | 0.0081 |
| SLC9B1           | -1.22 | 5.69E-03 | 0.0200 |
| SULT1A3          | -1.22 | 5.88E-03 | 0.0204 |
| SNTB1            | -1.22 | 7.25E-03 | 0.0232 |
| LINC02334        | -1.22 | 1.12E-02 | 0.0309 |
| OR52A1           | -1.22 | 5.15E-03 | 0.0188 |
| AC090517.2       | -1.22 | 1.27E-02 | 0.0334 |
| TMEM104          | -1.22 | 1.49E-02 | 0.0374 |
| AC009318.3       | -1.22 | 7.70E-03 | 0.0241 |
| TRAJ19           | -1.22 | 4.88E-03 | 0.0182 |
| ENST000000546660 | -1.22 | 9.72E-04 | 0.0076 |
| ENST000002730090 | -1.22 | 5.95E-03 | 0.0206 |
| CFAP54           | -1.22 | 2.35E-03 | 0.0121 |
| AC012349.1       | -1.22 | 2.12E-03 | 0.0113 |
| UBQLN2           | -1.22 | 2.35E-03 | 0.0121 |
| AC005304.2       | -1.22 | 2.56E-03 | 0.0126 |
| TRAJ27           | -1.22 | 1.18E-02 | 0.0320 |
| ENST000003246771 | -1.22 | 1.13E-02 | 0.0310 |
| ADI1             | -1.22 | 7.93E-04 | 0.0069 |
| REPS2            | -1.22 | 6.41E-03 | 0.0215 |
| GPS2             | -1.22 | 5.73E-03 | 0.0201 |
| LINC01722        | -1.22 | 1.16E-02 | 0.0316 |
| DOP1B            | -1.22 | 5.46E-03 | 0.0195 |
| MAP3K3           | -1.22 | 2.24E-03 | 0.0117 |
| AC007878.1       | -1.22 | 4.24E-03 | 0.0167 |
| AC079341.1       | -1.22 | 3.07E-03 | 0.0139 |
| AC091185.1       | -1.22 | 6.84E-03 | 0.0225 |
| TRAJ20           | -1.23 | 2.38E-03 | 0.0121 |
| ADAMTSL3         | -1.23 | 2.87E-03 | 0.0134 |
| AL450384.2       | -1.23 | 1.56E-03 | 0.0096 |
| RNF103           | -1.23 | 1.00E-03 | 0.0077 |
| 36951            | -1.23 | 1.91E-02 | 0.0446 |
| VPS13C           | -1.23 | 5.94E-04 | 0.0060 |
| GLCCI1           | -1.23 | 5.87E-03 | 0.0204 |
| SLC17A5          | -1.23 | 9.86E-04 | 0.0077 |
| SLC7A14          | -1.23 | 4.70E-03 | 0.0178 |
| TMC8             | -1.23 | 4.00E-03 | 0.0161 |
| RNF216           | -1.23 | 1.92E-03 | 0.0107 |
| TMEM154          | -1.23 | 7.25E-03 | 0.0232 |
| NBPF12           | -1.23 | 2.32E-03 | 0.0120 |
| AC002553.2       | -1.23 | 4.67E-03 | 0.0178 |

|                  |       |          |        |
|------------------|-------|----------|--------|
| SCN7A            | -1.23 | 2.19E-02 | 0.0493 |
| TRAV21           | -1.23 | 3.55E-03 | 0.0150 |
| ENST000002460691 | -1.23 | 2.01E-02 | 0.0463 |
| ASPA             | -1.23 | 1.60E-03 | 0.0097 |
| LINC01355        | -1.23 | 9.67E-04 | 0.0076 |
| TCTA             | -1.23 | 5.37E-03 | 0.0193 |
| EPB41            | -1.23 | 2.37E-03 | 0.0121 |
| CTSK             | -1.23 | 3.96E-03 | 0.0161 |
| RNPC3            | -1.23 | 1.02E-03 | 0.0078 |
| ARNTL            | -1.23 | 1.64E-02 | 0.0399 |
| AC138904.3       | -1.23 | 5.87E-03 | 0.0204 |
| TRAJ16           | -1.23 | 8.50E-03 | 0.0257 |
| MOGAT3           | -1.23 | 3.84E-03 | 0.0158 |
| ABHD13           | -1.23 | 6.14E-04 | 0.0061 |
| FOCAD            | -1.23 | 1.67E-02 | 0.0405 |
| ENST000003410711 | -1.24 | 3.36E-03 | 0.0146 |
| AC018521.7       | -1.24 | 7.56E-03 | 0.0239 |
| AC008938.1       | -1.24 | 4.65E-03 | 0.0177 |
| SEC14L6          | -1.24 | 2.19E-02 | 0.0493 |
| SCAMP1-AS1       | -1.24 | 1.63E-03 | 0.0099 |
| PKD2             | -1.24 | 1.33E-02 | 0.0345 |
| AC005498.3       | -1.24 | 9.75E-03 | 0.0281 |
| TRAJ26           | -1.24 | 6.61E-03 | 0.0220 |
| PSMA3-AS1        | -1.24 | 6.44E-04 | 0.0062 |
| HUNK             | -1.24 | 9.33E-03 | 0.0273 |
| AC079684.1       | -1.24 | 5.21E-03 | 0.0190 |
| ZNF852           | -1.24 | 1.10E-03 | 0.0080 |
| OR5A1            | -1.24 | 2.07E-02 | 0.0473 |
| AL135999.1       | -1.24 | 1.10E-02 | 0.0304 |
| NFIA             | -1.24 | 5.95E-03 | 0.0205 |
| RPRD2            | -1.24 | 1.12E-03 | 0.0081 |
| CYP46A1          | -1.24 | 9.57E-04 | 0.0076 |
| C12orf50         | -1.24 | 1.95E-03 | 0.0108 |
| RREB1            | -1.24 | 1.73E-03 | 0.0102 |
| AGER             | -1.24 | 1.25E-02 | 0.0331 |
| DGCR6            | -1.24 | 2.18E-02 | 0.0491 |
| AL133372.2       | -1.24 | 1.65E-02 | 0.0402 |
| LINC01653        | -1.24 | 5.18E-03 | 0.0189 |
| OR2AT4           | -1.25 | 1.82E-03 | 0.0104 |
| ZNF233           | -1.25 | 6.67E-03 | 0.0221 |
| HEXD             | -1.25 | 1.78E-03 | 0.0103 |
| SEPSECS-AS1      | -1.25 | 1.00E-03 | 0.0077 |
| CYTH4            | -1.25 | 9.89E-03 | 0.0284 |
| GBP4             | -1.25 | 3.46E-03 | 0.0148 |
| CLDND1           | -1.25 | 1.93E-03 | 0.0107 |
| USP3             | -1.25 | 8.08E-04 | 0.0070 |
| NAA60            | -1.25 | 2.48E-03 | 0.0124 |
| GMIP             | -1.25 | 1.35E-03 | 0.0089 |
| ENST000002735501 | -1.25 | 3.70E-03 | 0.0154 |
| RNF157           | -1.25 | 2.14E-03 | 0.0114 |

|                  |       |          |        |
|------------------|-------|----------|--------|
| SMG1P3           | -1.25 | 1.60E-02 | 0.0393 |
| AP001429.1       | -1.25 | 6.03E-03 | 0.0207 |
| TRAJ37           | -1.25 | 1.06E-02 | 0.0297 |
| TRIM22           | -1.25 | 3.04E-03 | 0.0138 |
| OR10K1           | -1.25 | 7.01E-03 | 0.0228 |
| ANKAR            | -1.25 | 1.74E-03 | 0.0102 |
| ENST000002562550 | -1.25 | 2.75E-03 | 0.0131 |
| ZSCAN26          | -1.25 | 1.50E-03 | 0.0094 |
| GCNT3            | -1.25 | 8.03E-03 | 0.0248 |
| ENST000003212502 | -1.25 | 9.07E-04 | 0.0074 |
| TSBP1-AS1        | -1.25 | 2.57E-03 | 0.0126 |
| MAPK8IP3         | -1.25 | 6.80E-04 | 0.0064 |
| ENST000003350252 | -1.25 | 1.85E-03 | 0.0105 |
| AC068587.4       | -1.26 | 1.36E-03 | 0.0089 |
| CCDC186          | -1.26 | 9.37E-04 | 0.0075 |
| U2AF1L4          | -1.26 | 4.31E-03 | 0.0169 |
| AC006946.2       | -1.26 | 2.78E-03 | 0.0132 |
| HIGD1AP16        | -1.26 | 2.04E-02 | 0.0468 |
| TUT4             | -1.26 | 6.70E-04 | 0.0064 |
| VGLL3            | -1.26 | 1.28E-02 | 0.0336 |
| TLR2             | -1.26 | 1.44E-02 | 0.0366 |
| AC114776.1       | -1.26 | 1.55E-02 | 0.0385 |
| AC023509.3       | -1.26 | 4.66E-03 | 0.0177 |
| AL592437.2       | -1.26 | 1.00E-02 | 0.0286 |
| AP003774.4       | -1.26 | 8.93E-03 | 0.0265 |
| ENST00000639349  | -1.26 | 8.93E-03 | 0.0265 |
| TRMO             | -1.26 | 7.28E-04 | 0.0066 |
| KIAA2026         | -1.26 | 7.59E-04 | 0.0067 |
| DNM1P47          | -1.26 | 1.62E-03 | 0.0098 |
| RF00019.470      | -1.27 | 1.30E-02 | 0.0339 |
| CD47             | -1.27 | 2.30E-03 | 0.0119 |
| ZNF319           | -1.27 | 4.46E-03 | 0.0173 |
| ARPIN            | -1.27 | 6.00E-03 | 0.0207 |
| ENST000002482110 | -1.27 | 3.08E-03 | 0.0139 |
| AP000350.10      | -1.27 | 5.59E-03 | 0.0197 |
| AP000350.7       | -1.27 | 5.59E-03 | 0.0197 |
| ZBTB40           | -1.27 | 7.13E-04 | 0.0065 |
| SH3YL1           | -1.27 | 2.03E-03 | 0.0110 |
| AC079466.1       | -1.27 | 3.97E-03 | 0.0161 |
| HCG27            | -1.27 | 1.96E-02 | 0.0456 |
| BLCAP            | -1.27 | 2.05E-03 | 0.0111 |
| AC243960.11      | -1.27 | 5.86E-03 | 0.0204 |
| FBXW8            | -1.27 | 3.03E-03 | 0.0138 |
| LRRC74B          | -1.27 | 1.96E-03 | 0.0108 |
| PCAT14           | -1.27 | 7.08E-03 | 0.0229 |
| ARHGAP12         | -1.27 | 6.30E-03 | 0.0213 |
| AC087473.1       | -1.27 | 5.79E-04 | 0.0060 |
| AC108463.3       | -1.27 | 1.51E-02 | 0.0378 |
| AC092802.1       | -1.27 | 3.29E-03 | 0.0144 |
| SHISA9           | -1.27 | 1.68E-02 | 0.0407 |

|                  |       |          |        |
|------------------|-------|----------|--------|
| RASAL3           | -1.27 | 7.10E-03 | 0.0230 |
| CLK4             | -1.27 | 1.17E-03 | 0.0083 |
| SNORD116-13      | -1.27 | 1.31E-02 | 0.0342 |
| ENST000002960881 | -1.27 | 7.91E-03 | 0.0246 |
| ENST00000623130  | -1.28 | 5.46E-04 | 0.0058 |
| MAN1A2           | -1.28 | 1.05E-03 | 0.0079 |
| ZBTB41           | -1.28 | 9.52E-04 | 0.0076 |
| RPL7P49          | -1.28 | 1.48E-02 | 0.0372 |
| WDFY2            | -1.28 | 8.58E-04 | 0.0072 |
| AC139494.4       | -1.28 | 2.23E-02 | 0.0499 |
| RORA             | -1.28 | 3.44E-03 | 0.0148 |
| XKR4             | -1.28 | 2.23E-02 | 0.0499 |
| GRIA1            | -1.28 | 1.68E-02 | 0.0407 |
| KANSL1L          | -1.28 | 1.92E-03 | 0.0107 |
| RN7SKP173        | -1.28 | 1.87E-02 | 0.0439 |
| AC022400.6       | -1.28 | 1.26E-02 | 0.0334 |
| UPP1             | -1.28 | 4.75E-03 | 0.0179 |
| ANKRD44          | -1.28 | 6.36E-04 | 0.0062 |
| AL035563.1       | -1.28 | 6.99E-03 | 0.0228 |
| AC104964.2       | -1.28 | 1.29E-02 | 0.0339 |
| TRAJ4            | -1.28 | 3.39E-03 | 0.0147 |
| MR1              | -1.28 | 8.81E-04 | 0.0073 |
| TRDC             | -1.28 | 4.64E-03 | 0.0177 |
| LINC02193        | -1.28 | 2.93E-03 | 0.0135 |
| GABRD            | -1.28 | 2.83E-03 | 0.0133 |
| AL139147.1       | -1.28 | 4.29E-03 | 0.0169 |
| ZBTB4            | -1.28 | 9.76E-04 | 0.0076 |
| ZNF528           | -1.28 | 7.97E-04 | 0.0069 |
| OR56A1           | -1.28 | 1.18E-02 | 0.0319 |
| AC034236.2       | -1.28 | 1.86E-02 | 0.0438 |
| AL136146.2       | -1.28 | 7.18E-03 | 0.0231 |
| CCPG1            | -1.28 | 3.55E-03 | 0.0150 |
| AC243960.1       | -1.28 | 6.30E-03 | 0.0213 |
| AC018845.3       | -1.28 | 1.07E-02 | 0.0298 |
| ACYP2            | -1.28 | 1.27E-03 | 0.0086 |
| LCP2             | -1.28 | 1.22E-03 | 0.0084 |
| BIN1             | -1.29 | 2.33E-03 | 0.0120 |
| ENST000002505593 | -1.29 | 6.34E-04 | 0.0062 |
| WHAMMP3          | -1.29 | 2.70E-03 | 0.0130 |
| SCARNA21         | -1.29 | 4.01E-03 | 0.0162 |
| NOD1             | -1.29 | 1.56E-03 | 0.0096 |
| LINC01630        | -1.29 | 1.37E-02 | 0.0353 |
| ENST000003173611 | -1.29 | 2.18E-02 | 0.0491 |
| AKNA             | -1.29 | 1.42E-03 | 0.0091 |
| TRBV11-2         | -1.29 | 6.68E-03 | 0.0222 |
| AC005224.1       | -1.29 | 1.43E-02 | 0.0364 |
| LINC02577        | -1.29 | 9.31E-03 | 0.0272 |
| MEF2D            | -1.29 | 1.81E-03 | 0.0104 |
| ZNF547           | -1.29 | 2.82E-03 | 0.0133 |
| AL034417.3       | -1.29 | 3.61E-03 | 0.0152 |

|                  |       |          |        |
|------------------|-------|----------|--------|
| RN7SKP180        | -1.29 | 1.93E-02 | 0.0450 |
| CNST             | -1.29 | 1.13E-03 | 0.0081 |
| AL021368.2       | -1.29 | 8.87E-04 | 0.0073 |
| AC022182.2       | -1.30 | 4.07E-03 | 0.0163 |
| LINC00667        | -1.30 | 1.09E-02 | 0.0303 |
| PAN2             | -1.30 | 1.47E-03 | 0.0093 |
| AMT              | -1.30 | 1.21E-02 | 0.0324 |
| CAPRIN2          | -1.30 | 8.44E-04 | 0.0071 |
| LINC00547        | -1.30 | 7.31E-03 | 0.0234 |
| CDC42SE1         | -1.30 | 4.99E-04 | 0.0056 |
| PTPRJ            | -1.30 | 6.59E-04 | 0.0063 |
| AC103957.2       | -1.30 | 1.47E-02 | 0.0370 |
| C3orf62          | -1.30 | 1.70E-03 | 0.0101 |
| CROCC            | -1.30 | 1.28E-02 | 0.0337 |
| ZNF566           | -1.30 | 1.06E-03 | 0.0079 |
| ZFYVE28          | -1.30 | 1.72E-02 | 0.0413 |
| LINC00670        | -1.30 | 1.85E-03 | 0.0105 |
| AP002807.1       | -1.30 | 2.29E-03 | 0.0119 |
| ATP2B4           | -1.30 | 1.41E-03 | 0.0091 |
| VAMP4            | -1.30 | 1.91E-02 | 0.0446 |
| PCNX1            | -1.30 | 4.22E-03 | 0.0167 |
| ORMDL3           | -1.30 | 1.47E-03 | 0.0093 |
| ENST00000640719  | -1.30 | 2.42E-03 | 0.0122 |
| AL049779.1       | -1.30 | 7.11E-03 | 0.0230 |
| ZNF224           | -1.30 | 5.79E-04 | 0.0060 |
| FAM228B          | -1.30 | 7.19E-04 | 0.0065 |
| TECRL            | -1.31 | 5.09E-03 | 0.0187 |
| ENST000003147422 | -1.31 | 6.94E-03 | 0.0227 |
| CLHC1            | -1.31 | 1.13E-02 | 0.0311 |
| GNRH1            | -1.31 | 1.63E-03 | 0.0099 |
| RNASET2          | -1.31 | 9.94E-03 | 0.0285 |
| CBFA2T2          | -1.31 | 1.11E-03 | 0.0081 |
| OR1A1            | -1.31 | 1.36E-03 | 0.0089 |
| ENST000003735040 | -1.31 | 1.10E-03 | 0.0080 |
| APOL4            | -1.31 | 3.91E-03 | 0.0160 |
| AC080013.1       | -1.31 | 1.07E-02 | 0.0298 |
| ATCAY            | -1.31 | 8.58E-03 | 0.0259 |
| CRYGS            | -1.31 | 3.14E-03 | 0.0140 |
| AL021368.4       | -1.31 | 4.23E-03 | 0.0167 |
| AL138889.1       | -1.31 | 3.25E-03 | 0.0143 |
| HNRNPA1P54       | -1.31 | 1.18E-03 | 0.0083 |
| INPP5D           | -1.31 | 1.01E-03 | 0.0078 |
| USP46            | -1.31 | 7.68E-04 | 0.0068 |
| C3orf35          | -1.31 | 2.57E-03 | 0.0126 |
| AC092279.1       | -1.31 | 2.18E-03 | 0.0115 |
| PDLIM2           | -1.31 | 1.81E-03 | 0.0104 |
| GPC2             | -1.31 | 2.05E-02 | 0.0470 |
| HTN3             | -1.32 | 9.84E-03 | 0.0283 |
| ENST000002160191 | -1.32 | 1.31E-03 | 0.0087 |
| ZNF385C          | -1.32 | 1.36E-02 | 0.0352 |

|                  |       |          |        |
|------------------|-------|----------|--------|
| TEX41            | -1.32 | 8.27E-03 | 0.0253 |
| SCARNA2          | -1.32 | 1.43E-02 | 0.0364 |
| AL358178.1       | -1.32 | 1.75E-02 | 0.0419 |
| LINC00623        | -1.32 | 1.05E-02 | 0.0294 |
| SKI              | -1.32 | 1.47E-02 | 0.0370 |
| ERVK9-11         | -1.32 | 7.78E-03 | 0.0243 |
| DIRC3            | -1.32 | 4.69E-03 | 0.0178 |
| RNASEL           | -1.32 | 5.25E-03 | 0.0190 |
| SLC30A4          | -1.32 | 2.62E-03 | 0.0128 |
| AC010632.2       | -1.32 | 1.11E-02 | 0.0307 |
| TRAJ22           | -1.32 | 1.35E-03 | 0.0089 |
| AC091078.3       | -1.32 | 2.84E-03 | 0.0134 |
| WASHC2C          | -1.32 | 5.86E-04 | 0.0060 |
| CCDC17           | -1.32 | 2.67E-03 | 0.0129 |
| PLEKHM1          | -1.32 | 3.89E-03 | 0.0159 |
| ENST00000640347  | -1.32 | 6.50E-04 | 0.0063 |
| AC119428.2       | -1.32 | 1.17E-02 | 0.0318 |
| TPP1             | -1.32 | 2.75E-03 | 0.0131 |
| AC004812.2       | -1.32 | 1.99E-03 | 0.0109 |
| SLC12A9          | -1.32 | 2.36E-03 | 0.0121 |
| CRTC3            | -1.32 | 8.73E-04 | 0.0072 |
| ENST00000640720  | -1.32 | 9.79E-04 | 0.0077 |
| SCARNA7          | -1.32 | 2.26E-03 | 0.0118 |
| AL162586.1       | -1.32 | 1.87E-02 | 0.0440 |
| PCSK5            | -1.32 | 1.10E-02 | 0.0304 |
| AC092944.1       | -1.32 | 2.22E-03 | 0.0117 |
| WWP1             | -1.32 | 7.05E-04 | 0.0065 |
| ZNF181           | -1.32 | 9.61E-04 | 0.0076 |
| EIF4E3           | -1.32 | 5.58E-03 | 0.0197 |
| PAXIP1-AS2       | -1.32 | 3.18E-03 | 0.0141 |
| ZBED5-AS1        | -1.33 | 5.15E-03 | 0.0188 |
| TRAPPC9          | -1.33 | 1.37E-03 | 0.0089 |
| ENST000002193430 | -1.33 | 1.22E-02 | 0.0327 |
| AC002519.1       | -1.33 | 1.87E-02 | 0.0440 |
| POU5F2           | -1.33 | 5.83E-04 | 0.0060 |
| RSRP1            | -1.33 | 2.24E-03 | 0.0117 |
| GSTK1            | -1.33 | 4.73E-04 | 0.0055 |
| TAB1             | -1.33 | 2.04E-02 | 0.0468 |
| NXPE3            | -1.33 | 2.80E-03 | 0.0133 |
| AC097634.1       | -1.33 | 7.34E-03 | 0.0234 |
| MPP3             | -1.33 | 1.28E-02 | 0.0337 |
| RNF166           | -1.33 | 4.54E-03 | 0.0175 |
| AL080317.3       | -1.33 | 1.68E-03 | 0.0100 |
| LINC01970        | -1.33 | 1.44E-02 | 0.0366 |
| KCNE4            | -1.33 | 3.16E-03 | 0.0141 |
| PLEKHO1          | -1.33 | 6.98E-03 | 0.0228 |
| PAQR8            | -1.33 | 7.15E-03 | 0.0231 |
| TSNAX-DISC1      | -1.33 | 1.47E-03 | 0.0093 |
| ING4             | -1.33 | 1.41E-03 | 0.0091 |
| FITM2            | -1.33 | 3.92E-03 | 0.0160 |

|                  |       |          |        |
|------------------|-------|----------|--------|
| LINC01776        | -1.33 | 3.26E-03 | 0.0143 |
| HSPBAP1          | -1.33 | 8.66E-03 | 0.0260 |
| CRYBG1           | -1.33 | 9.17E-04 | 0.0074 |
| AL353743.1       | -1.33 | 1.30E-03 | 0.0087 |
| HS3ST3B1         | -1.34 | 8.01E-04 | 0.0069 |
| AC010531.3       | -1.34 | 6.71E-03 | 0.0222 |
| AC002451.1       | -1.34 | 1.61E-02 | 0.0395 |
| ATAD2B           | -1.34 | 5.88E-04 | 0.0060 |
| AC009404.1       | -1.34 | 8.15E-03 | 0.0251 |
| LINC01934        | -1.34 | 1.29E-02 | 0.0338 |
| CCNT2            | -1.34 | 4.00E-04 | 0.0051 |
| AC044810.9       | -1.34 | 5.10E-03 | 0.0187 |
| GSTM2            | -1.34 | 4.10E-03 | 0.0164 |
| ENST000003415110 | -1.34 | 6.25E-03 | 0.0212 |
| ENST000003080080 | -1.34 | 3.20E-03 | 0.0142 |
| NPIP3            | -1.34 | 1.43E-03 | 0.0091 |
| LDHAL6CP         | -1.34 | 4.91E-03 | 0.0183 |
| AC021016.2       | -1.34 | 7.92E-03 | 0.0246 |
| PGBD5            | -1.34 | 1.39E-02 | 0.0357 |
| C1QTNF3          | -1.34 | 3.10E-03 | 0.0140 |
| LINC00937        | -1.34 | 6.16E-03 | 0.0210 |
| AL139220.1       | -1.34 | 1.27E-02 | 0.0335 |
| Z93930.2         | -1.34 | 1.91E-03 | 0.0106 |
| AC099792.1       | -1.34 | 4.61E-03 | 0.0176 |
| KPNA5            | -1.34 | 4.29E-04 | 0.0052 |
| PDHB             | -1.34 | 5.40E-03 | 0.0194 |
| FUT2             | -1.34 | 4.98E-03 | 0.0184 |
| AL022323.4       | -1.34 | 3.74E-03 | 0.0155 |
| ABHD3            | -1.34 | 2.00E-03 | 0.0109 |
| PODNL1           | -1.34 | 1.61E-02 | 0.0395 |
| LINC00550        | -1.34 | 9.42E-03 | 0.0274 |
| OR7C1            | -1.34 | 2.05E-03 | 0.0111 |
| TMC7             | -1.34 | 6.24E-03 | 0.0212 |
| NAGK             | -1.34 | 5.38E-04 | 0.0058 |
| ABO              | -1.35 | 5.82E-03 | 0.0203 |
| BICD1            | -1.35 | 2.19E-02 | 0.0493 |
| LINC00504        | -1.35 | 1.25E-03 | 0.0086 |
| MOB2             | -1.35 | 1.09E-03 | 0.0080 |
| OS9              | -1.35 | 4.52E-03 | 0.0174 |
| BTN3A3           | -1.35 | 1.64E-02 | 0.0400 |
| OR2I1P           | -1.35 | 1.37E-02 | 0.0353 |
| TMC3             | -1.35 | 1.38E-02 | 0.0355 |
| RELL1            | -1.35 | 9.66E-04 | 0.0076 |
| AC058823.1       | -1.35 | 1.52E-02 | 0.0379 |
| ENST000002738530 | -1.35 | 5.91E-04 | 0.0060 |
| GOLGA8B          | -1.35 | 4.53E-04 | 0.0054 |
| FLJ37035         | -1.35 | 1.39E-02 | 0.0357 |
| BTNL9            | -1.35 | 1.02E-02 | 0.0289 |
| TPRG1L           | -1.35 | 1.06E-03 | 0.0079 |
| AC026979.2       | -1.35 | 4.35E-03 | 0.0170 |

|                  |       |          |        |
|------------------|-------|----------|--------|
| ANKRD20A5P       | -1.35 | 2.92E-03 | 0.0135 |
| ARAF             | -1.35 | 4.16E-03 | 0.0165 |
| ARRDC2           | -1.35 | 1.85E-03 | 0.0105 |
| ZNF493           | -1.35 | 5.02E-03 | 0.0185 |
| LCORL            | -1.35 | 6.27E-04 | 0.0062 |
| AC096543.1       | -1.35 | 7.63E-03 | 0.0240 |
| AC087359.1       | -1.36 | 5.87E-03 | 0.0204 |
| ZNF550           | -1.36 | 4.27E-04 | 0.0052 |
| NANOG            | -1.36 | 3.46E-03 | 0.0148 |
| TRAJ18           | -1.36 | 1.23E-03 | 0.0085 |
| TBC1D25          | -1.36 | 1.45E-03 | 0.0092 |
| ZNF737           | -1.36 | 3.58E-03 | 0.0151 |
| ST3GAL1          | -1.36 | 4.94E-04 | 0.0056 |
| AC239799.1       | -1.36 | 1.36E-03 | 0.0089 |
| PRR12            | -1.36 | 2.13E-03 | 0.0113 |
| AC034213.1       | -1.36 | 5.51E-03 | 0.0196 |
| TRAJ28           | -1.36 | 5.84E-03 | 0.0203 |
| ZCWPW2           | -1.36 | 7.20E-03 | 0.0231 |
| AC103760.1       | -1.36 | 2.13E-03 | 0.0113 |
| ZNF528-AS1       | -1.36 | 2.45E-03 | 0.0123 |
| FLJ45513         | -1.36 | 7.00E-03 | 0.0228 |
| ENST000003352510 | -1.36 | 4.71E-04 | 0.0054 |
| TNFRSF25         | -1.36 | 8.02E-04 | 0.0069 |
| AC121758.1       | -1.36 | 2.91E-03 | 0.0135 |
| AC096644.4       | -1.36 | 1.87E-02 | 0.0440 |
| THEMIS2          | -1.36 | 4.34E-04 | 0.0052 |
| ERVW-1           | -1.36 | 5.93E-03 | 0.0205 |
| MAP3K1           | -1.36 | 2.36E-03 | 0.0121 |
| VPS8             | -1.36 | 6.72E-04 | 0.0064 |
| AL139220.2       | -1.36 | 1.81E-03 | 0.0104 |
| ZBTB37           | -1.36 | 4.77E-04 | 0.0055 |
| NUTM2B-AS1       | -1.36 | 4.23E-04 | 0.0052 |
| TTC34            | -1.37 | 7.17E-03 | 0.0231 |
| AL022310.1       | -1.37 | 8.14E-03 | 0.0251 |
| RGS17            | -1.37 | 2.68E-03 | 0.0129 |
| NUCB2            | -1.37 | 1.26E-03 | 0.0086 |
| PI4KA            | -1.37 | 6.57E-04 | 0.0063 |
| MC1R             | -1.37 | 1.15E-02 | 0.0313 |
| AIDA             | -1.37 | 5.42E-03 | 0.0194 |
| AP006222.1       | -1.37 | 1.37E-03 | 0.0089 |
| ZKSCAN3          | -1.37 | 3.08E-03 | 0.0139 |
| MIR548AJ2        | -1.37 | 1.04E-02 | 0.0294 |
| L3MBTL3          | -1.37 | 3.82E-03 | 0.0157 |
| TMEM198B         | -1.37 | 1.65E-02 | 0.0402 |
| NBPF2P           | -1.37 | 1.31E-02 | 0.0342 |
| ENST000003430030 | -1.37 | 5.63E-04 | 0.0059 |
| CR382287.2       | -1.37 | 3.20E-03 | 0.0142 |
| HCST             | -1.37 | 1.09E-02 | 0.0303 |
| ZNF699           | -1.37 | 1.64E-03 | 0.0099 |
| GPR55            | -1.37 | 2.26E-03 | 0.0118 |

|                  |       |          |        |
|------------------|-------|----------|--------|
| AP002008.3       | -1.37 | 9.11E-03 | 0.0269 |
| LINC01534        | -1.37 | 1.55E-03 | 0.0096 |
| RN7SL166P        | -1.37 | 8.15E-03 | 0.0251 |
| ENST000003898570 | -1.37 | 4.40E-04 | 0.0053 |
| PCNX2            | -1.37 | 4.79E-03 | 0.0180 |
| INPP5K           | -1.37 | 5.61E-03 | 0.0198 |
| MTMR10           | -1.37 | 3.99E-04 | 0.0051 |
| AL049840.5       | -1.37 | 4.69E-03 | 0.0178 |
| TEX35            | -1.37 | 1.41E-03 | 0.0091 |
| BCO2             | -1.38 | 2.61E-03 | 0.0127 |
| TPT1-AS1         | -1.38 | 2.67E-03 | 0.0129 |
| RN7SL650P        | -1.38 | 1.77E-02 | 0.0423 |
| TRAJ32           | -1.38 | 1.87E-03 | 0.0105 |
| POTEC            | -1.38 | 3.09E-03 | 0.0140 |
| HEXD-IT1         | -1.38 | 1.91E-03 | 0.0107 |
| MYLK4            | -1.38 | 7.94E-03 | 0.0246 |
| ACVR2B-AS1       | -1.38 | 1.05E-02 | 0.0296 |
| SCART1           | -1.38 | 3.30E-03 | 0.0144 |
| ZXDB             | -1.38 | 9.87E-04 | 0.0077 |
| KIFC2            | -1.38 | 1.03E-03 | 0.0078 |
| RN7SKP70         | -1.38 | 9.52E-03 | 0.0276 |
| C8orf34          | -1.38 | 5.29E-03 | 0.0191 |
| AC123768.3       | -1.38 | 1.96E-02 | 0.0455 |
| OR2A9P           | -1.38 | 7.46E-03 | 0.0237 |
| OSBPL7           | -1.38 | 1.23E-03 | 0.0085 |
| RDH16            | -1.38 | 2.46E-03 | 0.0123 |
| TRAJ38           | -1.38 | 2.18E-02 | 0.0491 |
| SNX29            | -1.38 | 1.67E-03 | 0.0100 |
| PPM1L            | -1.39 | 1.31E-02 | 0.0341 |
| ADH4             | -1.39 | 6.52E-03 | 0.0218 |
| MIA3             | -1.39 | 5.17E-03 | 0.0188 |
| RCAN3            | -1.39 | 6.39E-03 | 0.0215 |
| ENST000002433492 | -1.39 | 1.88E-02 | 0.0441 |
| TTC39C           | -1.39 | 8.75E-04 | 0.0072 |
| AC034102.4       | -1.39 | 1.88E-02 | 0.0441 |
| AC027097.1       | -1.39 | 1.23E-03 | 0.0085 |
| ADPRM            | -1.39 | 1.20E-03 | 0.0084 |
| CCDC91           | -1.39 | 4.66E-04 | 0.0054 |
| AC128685.1       | -1.39 | 2.86E-03 | 0.0134 |
| ANKMY1           | -1.39 | 8.33E-04 | 0.0071 |
| ZNF350           | -1.39 | 5.05E-04 | 0.0056 |
| AC012435.1       | -1.39 | 5.62E-03 | 0.0198 |
| PLCD1            | -1.39 | 1.08E-02 | 0.0300 |
| BICRAL           | -1.39 | 6.71E-04 | 0.0064 |
| ZNF708           | -1.39 | 5.14E-04 | 0.0057 |
| ENST000002646580 | -1.39 | 8.82E-04 | 0.0073 |
| AC010186.2       | -1.39 | 1.66E-03 | 0.0099 |
| AL158212.3       | -1.39 | 1.31E-03 | 0.0087 |
| SELL             | -1.39 | 5.73E-04 | 0.0059 |
| YPEL1            | -1.39 | 1.85E-02 | 0.0436 |

|                  |       |          |        |
|------------------|-------|----------|--------|
| DYNAP            | -1.40 | 1.08E-02 | 0.0301 |
| CD44-AS1         | -1.40 | 3.01E-03 | 0.0137 |
| ZNF577           | -1.40 | 8.99E-03 | 0.0267 |
| C5AR2            | -1.40 | 8.09E-03 | 0.0250 |
| RPS15AP10        | -1.40 | 3.60E-03 | 0.0152 |
| AC008770.3       | -1.40 | 1.19E-02 | 0.0321 |
| AC097376.2       | -1.40 | 8.42E-04 | 0.0071 |
| LPAR2            | -1.40 | 1.90E-03 | 0.0106 |
| ENST000003215213 | -1.40 | 2.04E-03 | 0.0110 |
| TTC12            | -1.41 | 2.74E-03 | 0.0131 |
| CD52             | -1.41 | 6.02E-03 | 0.0207 |
| B4GALNT2         | -1.41 | 1.83E-03 | 0.0104 |
| IL6R             | -1.41 | 4.99E-04 | 0.0056 |
| CCDC26           | -1.41 | 8.14E-04 | 0.0070 |
| STEAP4           | -1.41 | 6.11E-03 | 0.0209 |
| ENST000003241030 | -1.41 | 8.83E-03 | 0.0264 |
| 37316            | -1.41 | 1.05E-03 | 0.0079 |
| ENST000003160051 | -1.41 | 2.97E-03 | 0.0136 |
| RPL34-AS1        | -1.41 | 2.36E-03 | 0.0121 |
| AP000866.1       | -1.41 | 2.49E-03 | 0.0124 |
| AC243922.3       | -1.41 | 9.47E-04 | 0.0076 |
| LINC01873        | -1.41 | 1.01E-03 | 0.0078 |
| AL732372.2       | -1.41 | 7.73E-03 | 0.0242 |
| AC073957.3       | -1.41 | 5.06E-03 | 0.0186 |
| AP003774.3       | -1.41 | 1.33E-02 | 0.0345 |
| TRAJ51           | -1.41 | 1.83E-02 | 0.0433 |
| KRT8P33          | -1.41 | 1.32E-02 | 0.0343 |
| TBCC             | -1.41 | 8.30E-04 | 0.0071 |
| MYO3B-AS1        | -1.41 | 6.62E-03 | 0.0220 |
| CYTH1            | -1.41 | 7.53E-04 | 0.0067 |
| GMDS-DT          | -1.41 | 8.59E-04 | 0.0072 |
| TACC2            | -1.41 | 3.23E-03 | 0.0142 |
| POF1B            | -1.41 | 2.85E-03 | 0.0134 |
| AL157838.1       | -1.41 | 1.22E-02 | 0.0326 |
| CBX7             | -1.41 | 1.65E-03 | 0.0099 |
| AP005432.1       | -1.41 | 9.19E-03 | 0.0270 |
| AC024257.3       | -1.41 | 2.35E-03 | 0.0121 |
| CASP4            | -1.41 | 9.20E-04 | 0.0075 |
| MEGF9            | -1.42 | 1.04E-03 | 0.0079 |
| CC2D1B           | -1.42 | 5.13E-04 | 0.0057 |
| FAM242A          | -1.42 | 4.63E-03 | 0.0177 |
| DNAJC4           | -1.42 | 1.38E-02 | 0.0356 |
| 39508            | -1.42 | 7.12E-04 | 0.0065 |
| AC139795.1       | -1.42 | 2.13E-03 | 0.0113 |
| ATP9B            | -1.42 | 5.88E-04 | 0.0060 |
| ALOX15P1         | -1.42 | 1.15E-02 | 0.0314 |
| AL162578.1       | -1.42 | 1.11E-02 | 0.0306 |
| SNORA16B         | -1.42 | 2.20E-02 | 0.0494 |
| LINC00506        | -1.42 | 5.98E-04 | 0.0060 |
| ZNF517           | -1.42 | 1.51E-03 | 0.0094 |

|                  |       |          |        |
|------------------|-------|----------|--------|
| TMEM260          | -1.42 | 3.01E-03 | 0.0137 |
| AC096711.2       | -1.42 | 6.22E-03 | 0.0211 |
| ZNF487           | -1.42 | 1.12E-03 | 0.0081 |
| FAM13A-AS1       | -1.42 | 1.98E-02 | 0.0458 |
| TIRAP            | -1.42 | 7.18E-03 | 0.0231 |
| EPC1             | -1.42 | 3.91E-04 | 0.0050 |
| NKAPP1           | -1.42 | 4.97E-03 | 0.0184 |
| SMURF2           | -1.42 | 3.99E-04 | 0.0051 |
| ANO8             | -1.42 | 1.29E-03 | 0.0087 |
| LINC01088        | -1.42 | 8.57E-03 | 0.0259 |
| CDC37L1-DT       | -1.42 | 1.66E-02 | 0.0403 |
| GCLC             | -1.43 | 1.05E-02 | 0.0296 |
| DNMBP-AS1        | -1.43 | 1.00E-02 | 0.0286 |
| GLG1             | -1.43 | 9.45E-04 | 0.0076 |
| ARHGEF18         | -1.43 | 7.05E-03 | 0.0229 |
| TRAJ52           | -1.43 | 1.69E-02 | 0.0408 |
| PLLP             | -1.43 | 1.85E-03 | 0.0105 |
| ALOX12-AS1       | -1.43 | 2.16E-03 | 0.0114 |
| HERC2P9          | -1.43 | 2.14E-03 | 0.0114 |
| TRBJ2-3          | -1.43 | 1.75E-02 | 0.0419 |
| AC109927.2       | -1.43 | 3.76E-03 | 0.0156 |
| TRAJ7            | -1.43 | 1.06E-02 | 0.0298 |
| AC244207.2       | -1.43 | 2.20E-02 | 0.0494 |
| RNF125           | -1.43 | 1.34E-02 | 0.0347 |
| AC025539.1       | -1.43 | 9.17E-04 | 0.0074 |
| AC073896.2       | -1.43 | 1.04E-02 | 0.0293 |
| AC027097.2       | -1.43 | 9.61E-03 | 0.0278 |
| AC009318.1       | -1.43 | 3.45E-03 | 0.0148 |
| PPFIA1           | -1.43 | 5.51E-03 | 0.0196 |
| AP001099.1       | -1.43 | 6.04E-03 | 0.0208 |
| TRAJ21           | -1.43 | 1.83E-03 | 0.0104 |
| KLF12            | -1.43 | 1.06E-03 | 0.0079 |
| KCNJ5            | -1.43 | 1.10E-02 | 0.0305 |
| TFPI             | -1.43 | 4.83E-04 | 0.0055 |
| HELB             | -1.43 | 4.65E-04 | 0.0054 |
| AC087276.1       | -1.44 | 1.87E-02 | 0.0439 |
| ZNF805           | -1.44 | 1.51E-03 | 0.0094 |
| SHISA5           | -1.44 | 6.01E-03 | 0.0207 |
| USP25            | -1.44 | 1.07E-03 | 0.0080 |
| ENST000003134313 | -1.44 | 1.13E-02 | 0.0310 |
| PWAR6            | -1.44 | 5.43E-04 | 0.0058 |
| ENST000002621330 | -1.44 | 1.03E-03 | 0.0078 |
| GIMAP8           | -1.44 | 1.25E-02 | 0.0331 |
| CCDC30           | -1.44 | 8.49E-04 | 0.0071 |
| PLPP6            | -1.44 | 2.35E-03 | 0.0121 |
| AC135050.3       | -1.44 | 6.85E-03 | 0.0225 |
| C14orf28         | -1.44 | 5.93E-03 | 0.0205 |
| FRAT2            | -1.44 | 4.22E-03 | 0.0167 |
| SIPA1L3          | -1.44 | 2.42E-03 | 0.0123 |
| LINC02473        | -1.44 | 5.40E-03 | 0.0194 |

|                  |       |          |        |
|------------------|-------|----------|--------|
| ZNF226           | -1.44 | 6.77E-04 | 0.0064 |
| REXO1L1P         | -1.44 | 2.98E-03 | 0.0137 |
| FCHSD2           | -1.44 | 1.03E-03 | 0.0078 |
| AC112484.1       | -1.44 | 1.37E-02 | 0.0353 |
| ENST000003369760 | -1.44 | 3.75E-04 | 0.0049 |
| LINC02551        | -1.44 | 1.20E-02 | 0.0322 |
| AC007637.1       | -1.44 | 1.06E-02 | 0.0297 |
| DDX50P1          | -1.44 | 9.18E-03 | 0.0270 |
| LINC02444        | -1.44 | 2.30E-03 | 0.0119 |
| AL450992.1       | -1.44 | 4.42E-03 | 0.0172 |
| C10orf143        | -1.44 | 9.67E-03 | 0.0279 |
| AL513412.1       | -1.45 | 1.08E-02 | 0.0302 |
| AP002884.1       | -1.45 | 4.57E-03 | 0.0176 |
| DYRK1B           | -1.45 | 1.08E-02 | 0.0301 |
| AL157831.2       | -1.45 | 5.16E-03 | 0.0188 |
| PLSCR3           | -1.45 | 2.21E-03 | 0.0116 |
| CCDC122          | -1.45 | 3.60E-03 | 0.0152 |
| SERPINI1         | -1.45 | 1.64E-03 | 0.0099 |
| ZNF549           | -1.45 | 3.73E-04 | 0.0049 |
| NEGR1            | -1.45 | 9.62E-04 | 0.0076 |
| UGDH-AS1         | -1.45 | 3.43E-04 | 0.0048 |
| IGIP             | -1.45 | 5.25E-04 | 0.0057 |
| AC003991.1       | -1.45 | 2.35E-03 | 0.0121 |
| AL513548.1       | -1.45 | 2.01E-03 | 0.0110 |
| LLGL2            | -1.45 | 4.48E-03 | 0.0173 |
| ENST00000527515  | -1.45 | 2.09E-02 | 0.0476 |
| PIK3R1           | -1.45 | 7.88E-04 | 0.0069 |
| PDK2             | -1.45 | 2.83E-03 | 0.0133 |
| L3MBTL4-AS1      | -1.45 | 6.27E-03 | 0.0212 |
| AC048382.5       | -1.45 | 2.53E-03 | 0.0125 |
| TRAJ12           | -1.45 | 1.63E-03 | 0.0099 |
| NPHP3            | -1.45 | 1.08E-03 | 0.0080 |
| PPIAP41          | -1.45 | 1.24E-03 | 0.0085 |
| ENST000002861860 | -1.45 | 5.58E-04 | 0.0059 |
| CREBBP           | -1.45 | 4.65E-04 | 0.0054 |
| HGSNAT           | -1.45 | 1.11E-02 | 0.0306 |
| MED13L           | -1.45 | 8.72E-04 | 0.0072 |
| FRK              | -1.46 | 5.29E-04 | 0.0057 |
| AC007040.2       | -1.46 | 4.59E-03 | 0.0176 |
| RETREG1          | -1.46 | 2.18E-03 | 0.0115 |
| ENST000003392821 | -1.46 | 9.60E-04 | 0.0076 |
| PACS1            | -1.46 | 4.48E-03 | 0.0173 |
| DCDC1            | -1.46 | 1.77E-02 | 0.0423 |
| CDC20B           | -1.46 | 6.53E-03 | 0.0218 |
| ENST000002315243 | -1.46 | 1.04E-03 | 0.0079 |
| AL121992.3       | -1.46 | 1.49E-02 | 0.0374 |
| LINC00960        | -1.46 | 8.90E-03 | 0.0265 |
| TRG-AS1          | -1.46 | 1.19E-03 | 0.0083 |
| TRIM52           | -1.46 | 4.12E-04 | 0.0051 |
| AC004889.1       | -1.46 | 1.24E-02 | 0.0329 |

|                  |       |          |        |
|------------------|-------|----------|--------|
| TMEM72-AS1       | -1.46 | 8.02E-03 | 0.0248 |
| AC008728.1       | -1.46 | 2.66E-03 | 0.0129 |
| HMGA1P4          | -1.47 | 1.63E-02 | 0.0399 |
| AC009961.2       | -1.47 | 2.21E-02 | 0.0496 |
| LINC02260        | -1.47 | 2.44E-03 | 0.0123 |
| ARHGAP45         | -1.47 | 4.06E-03 | 0.0163 |
| LRP10            | -1.47 | 1.31E-03 | 0.0087 |
| GABRG3           | -1.47 | 1.97E-02 | 0.0456 |
| TMEM187          | -1.47 | 3.66E-03 | 0.0153 |
| TTC13            | -1.47 | 1.28E-03 | 0.0086 |
| DAP              | -1.47 | 6.62E-03 | 0.0220 |
| CASP8            | -1.47 | 8.50E-04 | 0.0071 |
| AC005261.3       | -1.47 | 5.51E-03 | 0.0196 |
| AC015819.1       | -1.47 | 6.54E-03 | 0.0218 |
| ACCS             | -1.47 | 6.15E-03 | 0.0210 |
| LGALS9           | -1.47 | 1.15E-02 | 0.0313 |
| AC009163.3       | -1.47 | 9.71E-03 | 0.0280 |
| ENST000003219451 | -1.47 | 2.16E-03 | 0.0114 |
| SLC13A4          | -1.47 | 1.51E-02 | 0.0378 |
| ZBTB11-AS1       | -1.47 | 2.58E-03 | 0.0127 |
| ENST000002603235 | -1.47 | 1.09E-02 | 0.0303 |
| UNC80            | -1.47 | 3.45E-03 | 0.0148 |
| ENST000003181302 | -1.47 | 2.92E-03 | 0.0135 |
| TMEM225B         | -1.47 | 7.55E-03 | 0.0238 |
| VNN2             | -1.47 | 1.25E-02 | 0.0332 |
| ITIH5            | -1.47 | 4.82E-03 | 0.0181 |
| ARL15            | -1.47 | 9.60E-04 | 0.0076 |
| FBXO3            | -1.48 | 6.79E-04 | 0.0064 |
| ENST000002950950 | -1.48 | 9.18E-04 | 0.0074 |
| AC027698.1       | -1.48 | 1.83E-02 | 0.0433 |
| RABGAP1L-IT1     | -1.48 | 5.40E-03 | 0.0194 |
| AC009283.1       | -1.48 | 3.93E-03 | 0.0160 |
| AC006978.2       | -1.48 | 3.52E-03 | 0.0150 |
| ATP8B2           | -1.48 | 4.55E-04 | 0.0054 |
| AC078906.1       | -1.48 | 8.14E-03 | 0.0251 |
| LEF1             | -1.48 | 9.12E-03 | 0.0269 |
| AC092329.4       | -1.48 | 2.94E-03 | 0.0135 |
| AC091614.1       | -1.48 | 2.03E-02 | 0.0466 |
| RPS3AP38         | -1.48 | 1.20E-02 | 0.0323 |
| AP001062.1       | -1.48 | 2.21E-03 | 0.0116 |
| GBP5             | -1.48 | 6.46E-03 | 0.0217 |
| PPIAP72          | -1.48 | 2.22E-02 | 0.0497 |
| ARHGAP25         | -1.48 | 1.22E-02 | 0.0327 |
| MACROD2          | -1.48 | 1.60E-02 | 0.0394 |
| LIX1             | -1.48 | 2.85E-03 | 0.0134 |
| AC106865.1       | -1.48 | 1.56E-03 | 0.0096 |
| AC104046.1       | -1.48 | 1.67E-02 | 0.0406 |
| RICTOR           | -1.48 | 7.25E-04 | 0.0066 |
| CAPN2            | -1.48 | 2.08E-03 | 0.0112 |
| RF00017.196      | -1.48 | 5.37E-03 | 0.0193 |

|                  |       |          |        |
|------------------|-------|----------|--------|
| CATSPERE         | -1.49 | 1.21E-02 | 0.0324 |
| ZNF222           | -1.49 | 1.60E-03 | 0.0098 |
| AL354943.1       | -1.49 | 1.23E-02 | 0.0328 |
| SOCS5P4          | -1.49 | 5.39E-03 | 0.0193 |
| SCHIP1           | -1.49 | 4.70E-03 | 0.0178 |
| CATSPERG         | -1.49 | 1.86E-03 | 0.0105 |
| KATNAL2          | -1.49 | 2.47E-03 | 0.0124 |
| LPAR5            | -1.49 | 3.52E-03 | 0.0150 |
| AL360013.2       | -1.49 | 5.39E-03 | 0.0193 |
| SUCLG2-AS1       | -1.49 | 2.95E-03 | 0.0136 |
| GPR89B           | -1.49 | 1.54E-03 | 0.0095 |
| ACAP2-IT1        | -1.49 | 2.06E-02 | 0.0472 |
| CTSS             | -1.49 | 3.22E-04 | 0.0047 |
| AC016727.1       | -1.49 | 2.47E-03 | 0.0124 |
| AC007743.1       | -1.49 | 9.90E-04 | 0.0077 |
| TMEM80           | -1.49 | 7.95E-04 | 0.0069 |
| ENST000003356700 | -1.50 | 2.87E-03 | 0.0134 |
| BCDIN3D          | -1.50 | 1.61E-03 | 0.0098 |
| ABI3BP           | -1.50 | 8.95E-03 | 0.0266 |
| PCMTD1           | -1.50 | 1.68E-03 | 0.0100 |
| LINC01697        | -1.50 | 4.86E-03 | 0.0181 |
| ENST00000641104  | -1.50 | 8.04E-03 | 0.0248 |
| TNRC6C           | -1.50 | 5.42E-04 | 0.0058 |
| AC104452.1       | -1.50 | 2.20E-02 | 0.0493 |
| AL669831.3       | -1.50 | 1.69E-02 | 0.0408 |
| CD163            | -1.50 | 4.59E-03 | 0.0176 |
| TAS2R5           | -1.50 | 7.90E-03 | 0.0245 |
| OMA1             | -1.50 | 4.94E-04 | 0.0056 |
| ANKRD23          | -1.50 | 1.90E-03 | 0.0106 |
| BLZF2P           | -1.50 | 8.64E-03 | 0.0260 |
| TMEM169          | -1.50 | 5.35E-03 | 0.0192 |
| SWT1             | -1.50 | 1.14E-03 | 0.0082 |
| AC020907.3       | -1.50 | 4.85E-03 | 0.0181 |
| C7orf43          | -1.50 | 2.52E-03 | 0.0125 |
| AC008115.3       | -1.50 | 2.23E-02 | 0.0499 |
| AC114490.3       | -1.50 | 1.60E-03 | 0.0098 |
| ASAH1            | -1.51 | 2.87E-04 | 0.0045 |
| ITGAL            | -1.51 | 4.74E-03 | 0.0179 |
| B3GAT1           | -1.51 | 4.85E-03 | 0.0181 |
| AC011374.2       | -1.51 | 1.87E-02 | 0.0439 |
| PROM2            | -1.51 | 2.01E-02 | 0.0462 |
| NKAIN3-IT1       | -1.51 | 1.12E-03 | 0.0081 |
| LINC01550        | -1.51 | 9.00E-04 | 0.0074 |
| CNNM2            | -1.51 | 5.69E-04 | 0.0059 |
| LINC00276        | -1.51 | 6.29E-04 | 0.0062 |
| CCM2             | -1.51 | 1.74E-03 | 0.0102 |
| AC010904.2       | -1.51 | 1.71E-02 | 0.0411 |
| MIR663B          | -1.51 | 2.07E-02 | 0.0472 |
| TRAV14DV4        | -1.51 | 8.67E-03 | 0.0261 |
| FAM41C           | -1.51 | 1.32E-02 | 0.0343 |

|                  |       |          |        |
|------------------|-------|----------|--------|
| CYYR1-AS1        | -1.51 | 4.73E-03 | 0.0179 |
| LINC02108        | -1.51 | 1.78E-03 | 0.0103 |
| SLC4A8           | -1.51 | 6.18E-03 | 0.0210 |
| TNPO1P1          | -1.51 | 4.55E-03 | 0.0175 |
| HBP1             | -1.51 | 9.93E-04 | 0.0077 |
| AC244669.1       | -1.51 | 6.95E-03 | 0.0227 |
| FLJ40194         | -1.51 | 1.39E-02 | 0.0356 |
| IYD              | -1.51 | 1.47E-03 | 0.0093 |
| FAM133DP         | -1.51 | 1.09E-02 | 0.0303 |
| C6orf163         | -1.52 | 2.90E-03 | 0.0135 |
| ZNF345           | -1.52 | 1.26E-03 | 0.0086 |
| TRAJ25           | -1.52 | 7.38E-03 | 0.0235 |
| AL662844.4       | -1.52 | 6.62E-03 | 0.0220 |
| EEF1A1P3         | -1.52 | 1.11E-03 | 0.0081 |
| GIMAP5           | -1.52 | 1.28E-02 | 0.0336 |
| PCMTD2           | -1.52 | 9.94E-04 | 0.0077 |
| USP11            | -1.52 | 1.23E-03 | 0.0085 |
| SNORD89          | -1.52 | 2.03E-02 | 0.0466 |
| AC007686.3       | -1.52 | 1.25E-02 | 0.0331 |
| MBD5             | -1.52 | 7.18E-04 | 0.0065 |
| FBXL20           | -1.52 | 1.35E-03 | 0.0089 |
| MPPE1            | -1.52 | 9.48E-03 | 0.0275 |
| SGTB             | -1.52 | 5.88E-04 | 0.0060 |
| AL136985.3       | -1.52 | 1.19E-03 | 0.0083 |
| FLG-AS1          | -1.52 | 4.48E-03 | 0.0173 |
| AC108751.4       | -1.52 | 1.74E-02 | 0.0418 |
| GABBR1           | -1.52 | 1.37E-02 | 0.0353 |
| NBPF1            | -1.52 | 3.36E-03 | 0.0146 |
| ENST000003234921 | -1.53 | 1.03E-02 | 0.0291 |
| ATXN7L1          | -1.53 | 1.09E-03 | 0.0080 |
| SLC35C1          | -1.53 | 5.08E-03 | 0.0187 |
| CREB5            | -1.53 | 6.77E-03 | 0.0223 |
| BEND6            | -1.53 | 3.20E-03 | 0.0142 |
| LINC00862        | -1.53 | 1.52E-02 | 0.0379 |
| ENST000003190801 | -1.53 | 3.22E-03 | 0.0142 |
| CHURC1           | -1.53 | 2.24E-04 | 0.0041 |
| AC008467.1       | -1.53 | 7.03E-04 | 0.0065 |
| AL354919.1       | -1.53 | 1.26E-02 | 0.0334 |
| COL1A2           | -1.53 | 1.14E-02 | 0.0312 |
| LMOD3            | -1.53 | 1.76E-02 | 0.0421 |
| OR2F1            | -1.53 | 1.16E-02 | 0.0316 |
| ZNF767P          | -1.53 | 1.76E-03 | 0.0102 |
| ZNF792           | -1.54 | 2.78E-03 | 0.0132 |
| MIR122HG         | -1.54 | 1.85E-03 | 0.0105 |
| SF3B1            | -1.54 | 6.87E-04 | 0.0064 |
| AL109659.1       | -1.54 | 1.34E-02 | 0.0347 |
| IQCN             | -1.54 | 1.94E-02 | 0.0451 |
| AC105233.5       | -1.54 | 8.28E-03 | 0.0253 |
| TRBV12-3         | -1.54 | 3.88E-03 | 0.0159 |
| AC211486.3       | -1.54 | 2.66E-03 | 0.0129 |

|                  |       |          |        |
|------------------|-------|----------|--------|
| AC092119.2       | -1.54 | 1.98E-03 | 0.0109 |
| HGD              | -1.54 | 1.03E-02 | 0.0291 |
| HFE              | -1.54 | 3.37E-03 | 0.0146 |
| KLHL22           | -1.54 | 2.82E-03 | 0.0133 |
| LINC00891        | -1.54 | 1.03E-02 | 0.0291 |
| HSPA1L           | -1.54 | 1.21E-03 | 0.0084 |
| CRISPLD2         | -1.54 | 2.48E-03 | 0.0124 |
| TRMT2B-AS1       | -1.54 | 1.08E-02 | 0.0301 |
| PLCL2            | -1.54 | 1.60E-03 | 0.0098 |
| ZNF44            | -1.54 | 3.49E-04 | 0.0048 |
| PATJ             | -1.54 | 5.39E-04 | 0.0058 |
| TAC4             | -1.54 | 9.05E-03 | 0.0267 |
| MARCH6           | -1.54 | 8.78E-03 | 0.0263 |
| AC007663.4       | -1.54 | 1.84E-02 | 0.0435 |
| SMYD3-IT1        | -1.54 | 1.49E-02 | 0.0374 |
| MPV17L           | -1.54 | 3.30E-03 | 0.0144 |
| ENST000003247652 | -1.55 | 9.18E-03 | 0.0270 |
| BX248409.1       | -1.55 | 1.02E-02 | 0.0289 |
| JMY              | -1.55 | 2.61E-03 | 0.0127 |
| AC007342.5       | -1.55 | 1.76E-02 | 0.0421 |
| LINC01224        | -1.55 | 7.11E-03 | 0.0230 |
| TSGA10           | -1.55 | 1.44E-03 | 0.0092 |
| CASR             | -1.55 | 5.62E-03 | 0.0198 |
| RF00017.2        | -1.55 | 1.94E-02 | 0.0451 |
| AP000542.3       | -1.55 | 1.30E-03 | 0.0087 |
| NMRK1            | -1.55 | 2.12E-03 | 0.0113 |
| ZSCAN16          | -1.55 | 1.04E-03 | 0.0079 |
| PRMT2            | -1.55 | 1.26E-03 | 0.0086 |
| DNAJB9           | -1.55 | 6.13E-04 | 0.0061 |
| SENP7            | -1.55 | 6.94E-04 | 0.0065 |
| ENST000003076581 | -1.55 | 2.28E-03 | 0.0118 |
| ENST000003152491 | -1.55 | 3.93E-03 | 0.0160 |
| PLCB2            | -1.56 | 6.21E-04 | 0.0062 |
| LRRC37A5P        | -1.56 | 7.42E-03 | 0.0236 |
| SLC44A2          | -1.56 | 3.48E-03 | 0.0149 |
| AC005072.1       | -1.56 | 1.29E-02 | 0.0339 |
| TRAJ8            | -1.56 | 1.43E-02 | 0.0363 |
| LRRC37B          | -1.56 | 1.32E-03 | 0.0088 |
| CACNA2D4         | -1.56 | 4.31E-03 | 0.0169 |
| TAS2R63P         | -1.56 | 1.11E-02 | 0.0307 |
| LINC01881        | -1.56 | 1.05E-02 | 0.0295 |
| CFAP70           | -1.56 | 3.97E-03 | 0.0161 |
| KLF7-IT1         | -1.56 | 1.30E-03 | 0.0087 |
| AC068870.1       | -1.56 | 1.29E-02 | 0.0339 |
| TADA2B           | -1.56 | 5.67E-04 | 0.0059 |
| RTCA-AS1         | -1.56 | 6.31E-03 | 0.0213 |
| AC138749.6       | -1.56 | 1.73E-03 | 0.0101 |
| TTC14            | -1.56 | 5.47E-04 | 0.0058 |
| AC017076.1       | -1.56 | 5.02E-03 | 0.0185 |
| ENST000002628940 | -1.56 | 1.71E-03 | 0.0101 |

|                  |       |          |        |
|------------------|-------|----------|--------|
| KCNJ3            | -1.56 | 1.27E-02 | 0.0334 |
| FAM71F2          | -1.56 | 1.85E-02 | 0.0436 |
| DHX58            | -1.56 | 8.05E-03 | 0.0249 |
| RF00017.88       | -1.56 | 6.16E-03 | 0.0210 |
| UBL3             | -1.56 | 2.08E-04 | 0.0040 |
| AC005232.1       | -1.56 | 1.06E-02 | 0.0296 |
| PTOV1-AS1        | -1.56 | 6.99E-03 | 0.0228 |
| AC139494.2       | -1.56 | 8.00E-03 | 0.0247 |
| PHC3             | -1.56 | 2.99E-04 | 0.0046 |
| FRG1DP           | -1.56 | 3.17E-03 | 0.0141 |
| C9orf72          | -1.56 | 1.34E-03 | 0.0088 |
| AC232271.1       | -1.57 | 2.26E-03 | 0.0118 |
| AC099489.1       | -1.57 | 3.19E-03 | 0.0141 |
| SPIN2A           | -1.57 | 5.70E-03 | 0.0200 |
| KLF8             | -1.57 | 5.07E-03 | 0.0186 |
| AL049830.3       | -1.57 | 2.43E-03 | 0.0123 |
| AC013474.1       | -1.57 | 1.20E-02 | 0.0323 |
| AC025171.1       | -1.57 | 2.78E-03 | 0.0132 |
| SLC2A5           | -1.57 | 1.60E-02 | 0.0394 |
| AL354718.1       | -1.57 | 1.29E-02 | 0.0339 |
| AC006511.5       | -1.57 | 1.88E-02 | 0.0442 |
| AL023755.1       | -1.57 | 5.64E-03 | 0.0199 |
| TBC1D2           | -1.57 | 1.04E-02 | 0.0294 |
| CCDC18-AS1       | -1.57 | 8.38E-04 | 0.0071 |
| ENST000003567980 | -1.57 | 2.19E-03 | 0.0115 |
| AC093726.1       | -1.57 | 4.72E-03 | 0.0178 |
| GRAP2            | -1.57 | 3.52E-03 | 0.0150 |
| LYG1             | -1.57 | 7.26E-03 | 0.0232 |
| AC010186.3       | -1.57 | 2.08E-03 | 0.0112 |
| AC241520.1       | -1.58 | 6.05E-03 | 0.0208 |
| AC044802.1       | -1.58 | 8.53E-03 | 0.0258 |
| NLRP12           | -1.58 | 1.42E-02 | 0.0362 |
| MPP7             | -1.58 | 1.54E-03 | 0.0095 |
| CASP1            | -1.58 | 9.37E-04 | 0.0075 |
| AC087239.1       | -1.58 | 3.80E-03 | 0.0157 |
| AC007342.1       | -1.58 | 9.86E-03 | 0.0283 |
| SYNJ2BP          | -1.58 | 2.44E-04 | 0.0042 |
| L3HYPDH          | -1.58 | 1.59E-03 | 0.0097 |
| DNASE1           | -1.58 | 3.60E-03 | 0.0152 |
| AC112503.2       | -1.58 | 1.41E-02 | 0.0361 |
| CBX4             | -1.58 | 1.64E-03 | 0.0099 |
| MAP2K6           | -1.58 | 5.32E-03 | 0.0192 |
| AC138150.1       | -1.58 | 7.32E-03 | 0.0234 |
| SLC22A2          | -1.58 | 1.43E-02 | 0.0365 |
| SCAF4            | -1.58 | 3.96E-03 | 0.0161 |
| ENST000003432101 | -1.59 | 1.12E-03 | 0.0081 |
| KLHL3            | -1.59 | 1.07E-03 | 0.0080 |
| AL031430.1       | -1.59 | 1.07E-03 | 0.0080 |
| EXOC6B           | -1.59 | 9.96E-03 | 0.0285 |
| AL604028.2       | -1.59 | 1.46E-03 | 0.0093 |

|                  |       |          |        |
|------------------|-------|----------|--------|
| NEB              | -1.59 | 3.21E-03 | 0.0142 |
| LINC01089        | -1.59 | 6.41E-04 | 0.0062 |
| LINC00221        | -1.59 | 5.47E-03 | 0.0195 |
| ZNF658           | -1.59 | 4.43E-04 | 0.0053 |
| MORC3            | -1.59 | 2.34E-04 | 0.0042 |
| KIAA0355         | -1.59 | 5.41E-04 | 0.0058 |
| OXNAD1           | -1.60 | 5.35E-04 | 0.0058 |
| AL606760.2       | -1.60 | 9.95E-03 | 0.0285 |
| AC012103.1       | -1.60 | 1.80E-02 | 0.0428 |
| AC053513.1       | -1.60 | 1.66E-03 | 0.0099 |
| AC099063.4       | -1.60 | 1.96E-03 | 0.0108 |
| AL138479.1       | -1.60 | 5.23E-03 | 0.0190 |
| UTRN             | -1.60 | 5.60E-04 | 0.0059 |
| AKAP7            | -1.60 | 4.26E-03 | 0.0168 |
| ENST000002678071 | -1.60 | 5.67E-04 | 0.0059 |
| CCDC112          | -1.60 | 1.42E-03 | 0.0091 |
| AL160191.1       | -1.60 | 1.97E-02 | 0.0456 |
| OR14J1           | -1.60 | 7.77E-04 | 0.0068 |
| SSBP2            | -1.60 | 2.62E-04 | 0.0044 |
| APPL2            | -1.60 | 6.13E-04 | 0.0061 |
| AC010680.5       | -1.60 | 2.34E-03 | 0.0120 |
| FBLIM1           | -1.60 | 1.55E-02 | 0.0385 |
| ENST000002620962 | -1.60 | 1.03E-03 | 0.0078 |
| MANEA-DT         | -1.60 | 3.50E-03 | 0.0149 |
| MAL              | -1.60 | 6.60E-03 | 0.0220 |
| ENST000003280890 | -1.60 | 1.78E-02 | 0.0423 |
| ENST000003442560 | -1.60 | 1.04E-03 | 0.0079 |
| ENST000003403600 | -1.60 | 2.01E-02 | 0.0463 |
| AL592183.1       | -1.60 | 1.58E-03 | 0.0097 |
| PIK3CG           | -1.60 | 1.46E-02 | 0.0368 |
| SGSH             | -1.61 | 6.03E-03 | 0.0207 |
| OR2M4            | -1.61 | 4.60E-03 | 0.0176 |
| AC092017.4       | -1.61 | 1.19E-03 | 0.0083 |
| TRAJ55           | -1.61 | 1.54E-02 | 0.0383 |
| AC079610.1       | -1.61 | 1.54E-03 | 0.0095 |
| ENST000003088240 | -1.61 | 6.90E-04 | 0.0064 |
| ZFAND4           | -1.61 | 5.63E-04 | 0.0059 |
| ENST000003094460 | -1.61 | 3.18E-03 | 0.0141 |
| AL589740.1       | -1.61 | 1.52E-02 | 0.0379 |
| AP000692.1       | -1.61 | 1.76E-03 | 0.0102 |
| RN7SL834P        | -1.61 | 8.54E-03 | 0.0258 |
| KRT18P31         | -1.61 | 4.18E-03 | 0.0166 |
| PRKXP1           | -1.61 | 8.04E-03 | 0.0248 |
| AL627230.2       | -1.61 | 6.62E-03 | 0.0220 |
| TTC9             | -1.61 | 7.42E-04 | 0.0067 |
| AC068790.2       | -1.61 | 6.38E-03 | 0.0215 |
| GIMAP6           | -1.61 | 1.69E-03 | 0.0101 |
| SPINK9           | -1.61 | 4.64E-03 | 0.0177 |
| TMEM108          | -1.61 | 1.73E-02 | 0.0415 |
| AC027455.2       | -1.62 | 5.75E-03 | 0.0201 |

|                  |       |          |        |
|------------------|-------|----------|--------|
| AC017035.1       | -1.62 | 6.62E-03 | 0.0220 |
| AC005154.2       | -1.62 | 2.81E-03 | 0.0133 |
| ENST000002915981 | -1.62 | 9.35E-04 | 0.0075 |
| AC116913.1       | -1.62 | 1.68E-03 | 0.0100 |
| HMGA2            | -1.62 | 7.39E-03 | 0.0235 |
| OR51E2           | -1.62 | 1.46E-02 | 0.0368 |
| APBB1IP          | -1.62 | 9.54E-04 | 0.0076 |
| ZNF571           | -1.62 | 3.17E-03 | 0.0141 |
| AC007842.1       | -1.62 | 1.29E-02 | 0.0338 |
| AC007842.2       | -1.62 | 1.29E-02 | 0.0338 |
| SFN              | -1.62 | 1.29E-02 | 0.0338 |
| TAS2R50          | -1.62 | 1.14E-02 | 0.0313 |
| AC005332.4       | -1.62 | 6.48E-03 | 0.0217 |
| TIAF1            | -1.62 | 8.60E-03 | 0.0259 |
| MAPK8IP2         | -1.62 | 1.42E-02 | 0.0362 |
| FAM186A          | -1.62 | 1.37E-02 | 0.0353 |
| ENST000002488990 | -1.62 | 1.79E-02 | 0.0425 |
| CELF4            | -1.62 | 1.49E-02 | 0.0373 |
| SLFN12L          | -1.62 | 2.61E-03 | 0.0127 |
| ZFP36            | -1.62 | 7.13E-03 | 0.0230 |
| AC009120.1       | -1.62 | 1.72E-03 | 0.0101 |
| KIAA0825         | -1.62 | 1.50E-03 | 0.0094 |
| PBX4             | -1.62 | 3.46E-03 | 0.0148 |
| AP000688.2       | -1.62 | 1.86E-02 | 0.0439 |
| TRBV29-1         | -1.62 | 2.10E-03 | 0.0113 |
| C2orf91          | -1.62 | 1.25E-03 | 0.0086 |
| SYNRG            | -1.63 | 6.03E-04 | 0.0061 |
| RN7SL600P        | -1.63 | 1.78E-02 | 0.0424 |
| SNTN             | -1.63 | 3.17E-03 | 0.0141 |
| GGT6             | -1.63 | 3.92E-03 | 0.0160 |
| TSPAN19          | -1.63 | 1.47E-03 | 0.0093 |
| LINC00863        | -1.63 | 1.08E-03 | 0.0080 |
| SCARNA10         | -1.63 | 1.99E-04 | 0.0040 |
| CPQ              | -1.63 | 1.31E-02 | 0.0342 |
| DRAXIN           | -1.63 | 3.36E-03 | 0.0146 |
| ZNF75D           | -1.63 | 5.39E-04 | 0.0058 |
| AC016405.1       | -1.63 | 9.87E-04 | 0.0077 |
| OCLN             | -1.63 | 6.79E-04 | 0.0064 |
| PLGLB1           | -1.63 | 6.06E-03 | 0.0208 |
| SLC2A4RG         | -1.63 | 9.98E-03 | 0.0285 |
| FAM21EP          | -1.63 | 4.53E-03 | 0.0174 |
| RN7SL577P        | -1.63 | 4.43E-03 | 0.0172 |
| AVIL             | -1.63 | 1.38E-03 | 0.0090 |
| ZNF30            | -1.63 | 4.59E-04 | 0.0054 |
| ITPKB            | -1.63 | 3.03E-03 | 0.0138 |
| AC008937.3       | -1.63 | 2.20E-02 | 0.0495 |
| AC005912.1       | -1.64 | 1.34E-02 | 0.0348 |
| FBXL17           | -1.64 | 7.03E-03 | 0.0228 |
| AC114956.3       | -1.64 | 3.58E-03 | 0.0151 |
| MAP3K5           | -1.64 | 4.76E-04 | 0.0055 |

|                  |       |          |        |
|------------------|-------|----------|--------|
| OMG              | -1.64 | 9.11E-03 | 0.0269 |
| AC022706.1       | -1.64 | 6.52E-03 | 0.0218 |
| FCER1G           | -1.64 | 1.65E-02 | 0.0402 |
| GGNBP1           | -1.64 | 2.13E-03 | 0.0114 |
| TRAJ44           | -1.64 | 1.28E-02 | 0.0338 |
| AL669831.4       | -1.64 | 5.02E-03 | 0.0185 |
| LRRTM4           | -1.64 | 5.92E-03 | 0.0205 |
| AC021660.3       | -1.64 | 3.43E-03 | 0.0147 |
| UBASH3A          | -1.64 | 4.63E-03 | 0.0177 |
| AC078795.3       | -1.64 | 1.41E-02 | 0.0361 |
| ENST000002643352 | -1.65 | 2.14E-02 | 0.0484 |
| IQSEC1           | -1.65 | 5.77E-04 | 0.0060 |
| TAS2R4           | -1.65 | 3.49E-03 | 0.0149 |
| ZNF862           | -1.65 | 1.47E-03 | 0.0093 |
| RN7SL775P        | -1.65 | 1.97E-02 | 0.0456 |
| UCKL1-AS1        | -1.65 | 1.11E-02 | 0.0307 |
| RNU6-82P         | -1.65 | 6.48E-03 | 0.0217 |
| MIAT             | -1.65 | 2.06E-03 | 0.0111 |
| AC026992.2       | -1.65 | 9.05E-03 | 0.0267 |
| EFHD1            | -1.65 | 1.39E-02 | 0.0356 |
| AC007383.2       | -1.65 | 2.49E-03 | 0.0124 |
| AC007383.4       | -1.65 | 2.49E-03 | 0.0124 |
| AL034546.1       | -1.65 | 1.60E-02 | 0.0394 |
| VAMP2            | -1.65 | 8.39E-04 | 0.0071 |
| AC136352.10      | -1.66 | 1.66E-03 | 0.0100 |
| AL627402.1       | -1.66 | 1.01E-02 | 0.0288 |
| ANKRD44-IT1      | -1.66 | 6.88E-03 | 0.0226 |
| NOSTRIN          | -1.66 | 1.07E-02 | 0.0300 |
| LRRC2            | -1.66 | 7.64E-03 | 0.0240 |
| ERMN             | -1.66 | 1.65E-03 | 0.0099 |
| FAM19A2          | -1.66 | 1.38E-03 | 0.0090 |
| PAX8-AS1         | -1.66 | 7.49E-03 | 0.0237 |
| KCNMB1           | -1.66 | 1.14E-02 | 0.0313 |
| LINC01091        | -1.66 | 1.12E-02 | 0.0309 |
| TCF7             | -1.67 | 2.67E-03 | 0.0129 |
| ENST00000550837  | -1.67 | 6.37E-04 | 0.0062 |
| ALKBH7           | -1.67 | 1.03E-03 | 0.0078 |
| SLC35E2A         | -1.67 | 2.33E-03 | 0.0120 |
| GPM6A            | -1.67 | 1.98E-03 | 0.0109 |
| INMT             | -1.67 | 2.19E-03 | 0.0115 |
| AC093157.2       | -1.67 | 1.28E-02 | 0.0338 |
| AL049697.1       | -1.67 | 1.76E-03 | 0.0102 |
| AC007529.1       | -1.67 | 3.27E-03 | 0.0143 |
| TRBV14           | -1.67 | 2.80E-03 | 0.0133 |
| NBPF15           | -1.67 | 7.79E-04 | 0.0068 |
| ENST000002026771 | -1.67 | 3.29E-04 | 0.0047 |
| FAM157B          | -1.67 | 1.05E-02 | 0.0294 |
| PART1            | -1.68 | 9.29E-03 | 0.0272 |
| PDP1             | -1.68 | 6.80E-04 | 0.0064 |
| NATD1            | -1.68 | 6.07E-03 | 0.0208 |

|                  |       |          |        |
|------------------|-------|----------|--------|
| RN7SL648P        | -1.68 | 2.00E-03 | 0.0109 |
| SEMA4C           | -1.68 | 3.13E-03 | 0.0140 |
| AL645933.2       | -1.68 | 1.85E-02 | 0.0436 |
| AC087664.2       | -1.68 | 6.00E-03 | 0.0207 |
| HSFX1            | -1.68 | 1.98E-02 | 0.0458 |
| AC013448.1       | -1.68 | 7.86E-03 | 0.0245 |
| ENST000002860630 | -1.68 | 1.42E-02 | 0.0362 |
| CRBN             | -1.68 | 2.12E-04 | 0.0041 |
| PATE4            | -1.69 | 1.49E-02 | 0.0373 |
| SYNPO2L          | -1.69 | 1.49E-02 | 0.0373 |
| EMB              | -1.69 | 4.07E-04 | 0.0051 |
| DIP2A            | -1.69 | 1.78E-03 | 0.0103 |
| AC090518.1       | -1.69 | 1.65E-02 | 0.0402 |
| AC006518.4       | -1.69 | 6.81E-03 | 0.0224 |
| LRRC37A4P        | -1.69 | 4.48E-04 | 0.0053 |
| TIPARP-AS1       | -1.69 | 2.88E-03 | 0.0134 |
| FYCO1            | -1.69 | 2.89E-04 | 0.0045 |
| GIMAP2           | -1.69 | 8.26E-04 | 0.0071 |
| TIMP1            | -1.69 | 2.36E-03 | 0.0121 |
| AC102953.2       | -1.69 | 5.98E-03 | 0.0206 |
| LINC02365        | -1.69 | 9.05E-03 | 0.0267 |
| TRAJ1            | -1.69 | 8.95E-03 | 0.0266 |
| AC009090.1       | -1.69 | 2.99E-03 | 0.0137 |
| ENST000003136241 | -1.69 | 4.48E-03 | 0.0173 |
| LMTK3            | -1.69 | 8.72E-03 | 0.0262 |
| YWHABP2          | -1.69 | 1.41E-02 | 0.0361 |
| AL355816.2       | -1.69 | 3.96E-03 | 0.0160 |
| C21orf62-AS1     | -1.69 | 1.61E-03 | 0.0098 |
| DGKA             | -1.69 | 1.79E-03 | 0.0103 |
| RPS3P2           | -1.70 | 6.69E-03 | 0.0222 |
| PGGHG            | -1.70 | 2.68E-04 | 0.0044 |
| C9orf131         | -1.70 | 6.46E-03 | 0.0217 |
| AC006042.3       | -1.70 | 1.29E-02 | 0.0339 |
| MAN2B2           | -1.70 | 1.95E-04 | 0.0039 |
| ANO9             | -1.70 | 6.71E-04 | 0.0064 |
| CCDC69           | -1.70 | 1.90E-04 | 0.0039 |
| AL157392.3       | -1.70 | 1.13E-03 | 0.0081 |
| CHST12           | -1.70 | 2.96E-04 | 0.0046 |
| LINC00336        | -1.70 | 8.82E-03 | 0.0263 |
| AC111182.1       | -1.70 | 2.94E-03 | 0.0136 |
| AL589993.1       | -1.70 | 5.94E-04 | 0.0060 |
| CDKN2A           | -1.70 | 7.76E-03 | 0.0243 |
| ENST000002946640 | -1.70 | 2.21E-02 | 0.0495 |
| GAL3ST4          | -1.70 | 5.23E-03 | 0.0190 |
| TSC22D1-AS1      | -1.70 | 1.55E-02 | 0.0384 |
| FTX              | -1.71 | 2.71E-04 | 0.0044 |
| SBK1             | -1.71 | 5.15E-03 | 0.0188 |
| AC122718.2       | -1.71 | 5.45E-03 | 0.0195 |
| OR2A7            | -1.71 | 2.97E-03 | 0.0136 |
| AC104966.1       | -1.71 | 1.73E-02 | 0.0414 |

|                  |       |          |        |
|------------------|-------|----------|--------|
| ZBTB20-AS4       | -1.71 | 2.19E-02 | 0.0493 |
| SCARNA5          | -1.71 | 6.64E-04 | 0.0063 |
| TRAV8-3          | -1.71 | 1.07E-03 | 0.0079 |
| BID              | -1.71 | 4.74E-04 | 0.0055 |
| FABP2            | -1.71 | 1.07E-03 | 0.0080 |
| AL133245.1       | -1.71 | 2.67E-03 | 0.0129 |
| NPM1P37          | -1.71 | 1.09E-03 | 0.0080 |
| STK10            | -1.71 | 2.80E-04 | 0.0045 |
| PTPN12           | -1.72 | 9.80E-04 | 0.0077 |
| AC100832.2       | -1.72 | 1.62E-02 | 0.0397 |
| SPAG5-AS1        | -1.72 | 1.13E-03 | 0.0081 |
| BTN3A2           | -1.72 | 5.77E-04 | 0.0060 |
| C20orf144        | -1.72 | 1.21E-02 | 0.0324 |
| CBR3-AS1         | -1.72 | 5.86E-04 | 0.0060 |
| SCN2A            | -1.72 | 6.64E-04 | 0.0063 |
| HNRNPH1P1        | -1.72 | 1.89E-02 | 0.0442 |
| RF00017.166      | -1.72 | 4.73E-03 | 0.0179 |
| ENST000002742033 | -1.72 | 1.81E-04 | 0.0039 |
| AC090198.1       | -1.72 | 6.25E-04 | 0.0062 |
| CASK             | -1.73 | 1.02E-03 | 0.0078 |
| PFN1P2           | -1.73 | 1.32E-02 | 0.0343 |
| STRA6LP          | -1.73 | 1.40E-03 | 0.0091 |
| JMJD7-PLA2G4B    | -1.73 | 5.91E-04 | 0.0060 |
| KIAA1324L        | -1.73 | 1.52E-02 | 0.0379 |
| PTGDS            | -1.73 | 1.06E-02 | 0.0297 |
| AC096921.2       | -1.73 | 2.94E-03 | 0.0136 |
| OR7E122P         | -1.73 | 6.93E-04 | 0.0065 |
| ENST000003180231 | -1.73 | 3.99E-03 | 0.0161 |
| HSD17B11         | -1.73 | 1.64E-03 | 0.0099 |
| PCAT1            | -1.73 | 6.80E-04 | 0.0064 |
| AL359962.2       | -1.74 | 1.53E-03 | 0.0095 |
| ENST000002814710 | -1.74 | 2.60E-03 | 0.0127 |
| CASP17P          | -1.74 | 3.16E-03 | 0.0141 |
| AL356259.1       | -1.74 | 1.65E-02 | 0.0401 |
| SLC39A12-AS1     | -1.74 | 2.54E-03 | 0.0126 |
| ERN1             | -1.74 | 3.20E-03 | 0.0142 |
| SMAD9            | -1.74 | 2.56E-03 | 0.0126 |
| ENST000003677710 | -1.74 | 3.70E-04 | 0.0049 |
| TMEM140          | -1.74 | 1.64E-03 | 0.0099 |
| FAM229A          | -1.74 | 3.45E-03 | 0.0148 |
| ZNF211           | -1.74 | 3.44E-03 | 0.0148 |
| RNPEPL1          | -1.74 | 2.61E-03 | 0.0127 |
| ALS2CR12         | -1.74 | 3.52E-03 | 0.0150 |
| POT1-AS1         | -1.74 | 7.46E-04 | 0.0067 |
| PCYOX1L          | -1.74 | 2.18E-04 | 0.0041 |
| DENND4C          | -1.74 | 2.31E-04 | 0.0042 |
| DBP              | -1.74 | 4.69E-04 | 0.0054 |
| FSIP2            | -1.75 | 3.51E-04 | 0.0048 |
| AC004890.2       | -1.75 | 7.08E-04 | 0.0065 |
| LRRC37A3         | -1.75 | 1.09E-02 | 0.0303 |

|                  |       |          |        |
|------------------|-------|----------|--------|
| CASS4            | -1.75 | 1.88E-02 | 0.0442 |
| OBSCN            | -1.75 | 8.08E-04 | 0.0070 |
| AL360091.1       | -1.75 | 1.28E-02 | 0.0337 |
| AC095057.3       | -1.75 | 2.77E-03 | 0.0132 |
| TGIF2P1          | -1.75 | 2.11E-02 | 0.0480 |
| PRDM11           | -1.75 | 2.14E-03 | 0.0114 |
| ENST000003414550 | -1.75 | 1.95E-03 | 0.0107 |
| AC016705.2       | -1.75 | 5.46E-03 | 0.0195 |
| AC011477.1       | -1.75 | 2.73E-03 | 0.0131 |
| FAM66E           | -1.75 | 1.56E-02 | 0.0385 |
| AC089987.1       | -1.76 | 1.50E-02 | 0.0376 |
| SLC25A21         | -1.76 | 1.99E-02 | 0.0460 |
| ARHGAP42P4       | -1.76 | 6.71E-03 | 0.0222 |
| SIDT1            | -1.76 | 7.20E-04 | 0.0065 |
| RSU1P2           | -1.76 | 1.32E-02 | 0.0343 |
| ZFP3             | -1.76 | 2.89E-03 | 0.0134 |
| AC007038.1       | -1.76 | 1.22E-03 | 0.0084 |
| SLC29A3          | -1.76 | 1.05E-02 | 0.0296 |
| AL606834.2       | -1.76 | 1.92E-03 | 0.0107 |
| TMIGD2           | -1.76 | 2.26E-04 | 0.0041 |
| PIK3R5           | -1.76 | 1.57E-02 | 0.0387 |
| TRIM73           | -1.76 | 1.04E-03 | 0.0078 |
| WBP2NL           | -1.76 | 1.63E-03 | 0.0098 |
| AL357054.1       | -1.76 | 1.69E-02 | 0.0408 |
| SYCE1L           | -1.76 | 1.57E-02 | 0.0388 |
| PGM5             | -1.76 | 2.85E-03 | 0.0134 |
| TOMM20P2         | -1.76 | 6.69E-03 | 0.0222 |
| CARF             | -1.76 | 1.77E-03 | 0.0102 |
| IGF1R            | -1.76 | 3.79E-03 | 0.0156 |
| TSC22D1          | -1.76 | 5.36E-04 | 0.0058 |
| AC010900.1       | -1.76 | 1.13E-02 | 0.0310 |
| RRS1-AS1         | -1.76 | 8.80E-04 | 0.0073 |
| ABHD12B          | -1.76 | 9.99E-03 | 0.0285 |
| FBLN5            | -1.77 | 9.06E-03 | 0.0268 |
| MIR22HG          | -1.77 | 3.16E-03 | 0.0141 |
| TRHDE-AS1        | -1.77 | 1.73E-03 | 0.0101 |
| AC022929.2       | -1.77 | 2.38E-04 | 0.0042 |
| AL136981.2       | -1.77 | 2.79E-03 | 0.0133 |
| ENST000002327442 | -1.77 | 8.18E-03 | 0.0251 |
| AP003486.1       | -1.77 | 3.23E-04 | 0.0047 |
| MCOLN3           | -1.77 | 1.40E-02 | 0.0358 |
| CYSLTR1          | -1.77 | 9.31E-03 | 0.0272 |
| IL6R-AS1         | -1.77 | 1.40E-02 | 0.0359 |
| SETD1B           | -1.77 | 1.60E-03 | 0.0098 |
| Z98048.1         | -1.78 | 1.99E-02 | 0.0460 |
| RF00017.200      | -1.78 | 1.94E-02 | 0.0451 |
| ENST000003136631 | -1.78 | 1.37E-02 | 0.0353 |
| SOX5             | -1.78 | 7.50E-03 | 0.0237 |
| MIR5194          | -1.78 | 1.19E-02 | 0.0321 |
| AC108010.1       | -1.78 | 1.45E-03 | 0.0092 |

|                  |       |          |        |
|------------------|-------|----------|--------|
| ENST000003209964 | -1.78 | 3.22E-03 | 0.0142 |
| AC090241.3       | -1.78 | 1.75E-03 | 0.0102 |
| IKBKE            | -1.78 | 8.19E-04 | 0.0070 |
| EFCAB12          | -1.78 | 9.04E-03 | 0.0267 |
| ENST000002825162 | -1.78 | 3.92E-04 | 0.0050 |
| DCN              | -1.78 | 1.43E-02 | 0.0364 |
| AC005775.1       | -1.78 | 1.42E-02 | 0.0362 |
| AP000766.1       | -1.78 | 3.72E-03 | 0.0155 |
| AC113420.1       | -1.78 | 2.09E-02 | 0.0476 |
| ZNF425           | -1.79 | 2.21E-03 | 0.0116 |
| DOP1A            | -1.79 | 2.20E-04 | 0.0041 |
| FLT3LG           | -1.79 | 1.86E-03 | 0.0105 |
| TRBV19           | -1.79 | 3.19E-04 | 0.0047 |
| TECPR1           | -1.79 | 4.95E-04 | 0.0056 |
| NONOP2           | -1.79 | 4.48E-03 | 0.0173 |
| TRAJ3            | -1.79 | 8.45E-04 | 0.0071 |
| NBPF19           | -1.79 | 6.41E-04 | 0.0062 |
| ZNF350-AS1       | -1.79 | 9.75E-03 | 0.0281 |
| IL12A-AS1        | -1.80 | 1.15E-02 | 0.0313 |
| TNFRSF10A        | -1.80 | 2.68E-04 | 0.0044 |
| RNU4-24P         | -1.80 | 1.44E-02 | 0.0366 |
| ENST000003485200 | -1.80 | 4.85E-04 | 0.0055 |
| MYO3B            | -1.80 | 7.08E-03 | 0.0229 |
| C1orf54          | -1.80 | 1.10E-02 | 0.0304 |
| ENST000003385601 | -1.80 | 2.60E-04 | 0.0044 |
| SMAD3            | -1.80 | 1.68E-03 | 0.0100 |
| AL359962.1       | -1.80 | 1.23E-03 | 0.0085 |
| SLC35E2B         | -1.80 | 3.80E-03 | 0.0157 |
| LINC01719        | -1.80 | 6.20E-03 | 0.0211 |
| LILRB4           | -1.80 | 1.17E-02 | 0.0318 |
| ERICH6-AS1       | -1.80 | 1.57E-03 | 0.0097 |
| ENST000002971090 | -1.81 | 1.76E-04 | 0.0039 |
| AL008727.1       | -1.81 | 2.18E-03 | 0.0115 |
| PINK1            | -1.81 | 2.76E-04 | 0.0044 |
| HACD4            | -1.81 | 8.10E-03 | 0.0250 |
| AL355596.1       | -1.81 | 3.54E-03 | 0.0150 |
| KLHL6-AS1        | -1.81 | 8.92E-04 | 0.0073 |
| GPR155           | -1.81 | 5.22E-03 | 0.0190 |
| AL671710.1       | -1.81 | 7.04E-03 | 0.0229 |
| WHAMM            | -1.81 | 1.22E-03 | 0.0084 |
| LMO7             | -1.81 | 3.89E-04 | 0.0050 |
| AC040977.1       | -1.81 | 9.34E-03 | 0.0273 |
| AC090377.1       | -1.81 | 1.57E-03 | 0.0096 |
| AC007406.5       | -1.81 | 1.29E-03 | 0.0087 |
| MDGA1            | -1.81 | 5.89E-04 | 0.0060 |
| AC092747.2       | -1.82 | 1.46E-02 | 0.0370 |
| BDNF-AS          | -1.82 | 4.30E-03 | 0.0169 |
| C3orf20          | -1.82 | 1.98E-02 | 0.0459 |
| GABRP            | -1.82 | 5.72E-03 | 0.0201 |
| ZNF252P-AS1      | -1.82 | 1.35E-02 | 0.0349 |

|                  |       |          |        |
|------------------|-------|----------|--------|
| PITPNM2          | -1.82 | 1.43E-02 | 0.0364 |
| MITF             | -1.82 | 1.07E-02 | 0.0299 |
| AC114490.2       | -1.82 | 2.57E-03 | 0.0126 |
| STX3             | -1.82 | 2.87E-04 | 0.0045 |
| ENST000002609081 | -1.82 | 5.00E-04 | 0.0056 |
| LINC02615        | -1.83 | 4.10E-03 | 0.0164 |
| SUGT1P4-STRA6LP  | -1.83 | 5.22E-03 | 0.0190 |
| OR4D1            | -1.83 | 1.21E-03 | 0.0084 |
| AP001160.3       | -1.83 | 8.94E-03 | 0.0266 |
| MIR421           | -1.83 | 1.82E-03 | 0.0104 |
| AC136475.3       | -1.83 | 7.20E-04 | 0.0065 |
| SELENOP          | -1.83 | 1.96E-02 | 0.0455 |
| AC020779.1       | -1.83 | 1.38E-02 | 0.0356 |
| AL356020.1       | -1.83 | 7.51E-03 | 0.0238 |
| AC098679.2       | -1.83 | 1.24E-02 | 0.0331 |
| FAM8A1           | -1.83 | 4.96E-04 | 0.0056 |
| AC005332.3       | -1.83 | 4.38E-03 | 0.0171 |
| RF00554.5        | -1.83 | 1.59E-02 | 0.0393 |
| TRAJ13           | -1.83 | 7.37E-04 | 0.0066 |
| LINC00868        | -1.83 | 4.70E-03 | 0.0178 |
| AC122718.1       | -1.83 | 9.00E-03 | 0.0267 |
| AL133330.1       | -1.83 | 7.06E-03 | 0.0229 |
| MGAT4A           | -1.83 | 5.12E-04 | 0.0056 |
| POC1B-AS1        | -1.84 | 2.66E-04 | 0.0044 |
| SEC31B           | -1.84 | 4.74E-04 | 0.0055 |
| PSMD6-AS1        | -1.84 | 2.10E-02 | 0.0479 |
| ZPLD1            | -1.84 | 2.20E-02 | 0.0495 |
| ENST000002272140 | -1.84 | 4.98E-03 | 0.0184 |
| RPS4XP16         | -1.84 | 1.95E-03 | 0.0107 |
| AL391684.1       | -1.84 | 2.73E-03 | 0.0131 |
| KRBA2            | -1.84 | 7.75E-04 | 0.0068 |
| AC011726.3       | -1.84 | 1.29E-02 | 0.0339 |
| LINC01122        | -1.84 | 1.81E-02 | 0.0430 |
| ENST00000471810  | -1.84 | 9.02E-03 | 0.0267 |
| AC005670.2       | -1.84 | 1.52E-02 | 0.0380 |
| AC008072.1       | -1.84 | 9.43E-03 | 0.0274 |
| AC008760.1       | -1.84 | 2.02E-02 | 0.0465 |
| ENST000003946571 | -1.84 | 9.97E-03 | 0.0285 |
| ENST000002850130 | -1.85 | 1.26E-03 | 0.0086 |
| TENT5C           | -1.85 | 2.17E-03 | 0.0115 |
| MUC20            | -1.85 | 1.38E-03 | 0.0090 |
| ATP5MGL          | -1.85 | 7.21E-03 | 0.0231 |
| EDEM3            | -1.85 | 1.88E-04 | 0.0039 |
| RF00017.62       | -1.85 | 1.16E-02 | 0.0317 |
| LRRC37A17P       | -1.85 | 1.88E-02 | 0.0441 |
| AL365255.1       | -1.85 | 1.29E-02 | 0.0339 |
| Z83843.1         | -1.85 | 1.70E-04 | 0.0038 |
| AC079062.1       | -1.85 | 1.49E-02 | 0.0374 |
| ENST000002160370 | -1.85 | 7.22E-03 | 0.0232 |
| LINC02362        | -1.85 | 1.57E-03 | 0.0097 |

|                  |       |          |        |
|------------------|-------|----------|--------|
| CTSD             | -1.85 | 2.49E-04 | 0.0043 |
| ACSS1            | -1.85 | 2.63E-04 | 0.0044 |
| ZNF101           | -1.86 | 1.40E-04 | 0.0036 |
| MMP25-AS1        | -1.86 | 2.41E-03 | 0.0122 |
| CECR2            | -1.86 | 5.40E-03 | 0.0194 |
| IDO2             | -1.86 | 1.87E-02 | 0.0439 |
| LINC02325        | -1.86 | 3.34E-04 | 0.0047 |
| LINC01772        | -1.86 | 1.37E-03 | 0.0089 |
| MIR548E          | -1.86 | 1.75E-02 | 0.0418 |
| MPP4             | -1.86 | 1.89E-02 | 0.0443 |
| LYSMD3           | -1.86 | 2.53E-03 | 0.0125 |
| BMS1P22          | -1.86 | 1.14E-02 | 0.0313 |
| TRGC1            | -1.86 | 7.83E-03 | 0.0244 |
| NELL2            | -1.87 | 1.16E-02 | 0.0316 |
| GLI4             | -1.87 | 3.93E-03 | 0.0160 |
| TMEM8A           | -1.87 | 2.46E-03 | 0.0124 |
| RIPK3            | -1.87 | 1.20E-03 | 0.0084 |
| AC009803.3       | -1.87 | 1.72E-02 | 0.0414 |
| AL354793.1       | -1.87 | 7.95E-03 | 0.0247 |
| AL445531.1       | -1.87 | 2.61E-03 | 0.0127 |
| RPS2P45          | -1.87 | 1.51E-03 | 0.0094 |
| THRB-IT1         | -1.87 | 1.90E-02 | 0.0444 |
| RABL2A           | -1.87 | 1.47E-03 | 0.0093 |
| AC055717.1       | -1.87 | 2.83E-03 | 0.0133 |
| PLEKHM1P1        | -1.87 | 2.44E-04 | 0.0042 |
| MHENCR           | -1.87 | 3.61E-03 | 0.0152 |
| SPP2             | -1.87 | 9.98E-04 | 0.0077 |
| TMEM50B          | -1.87 | 1.62E-04 | 0.0037 |
| NDRG2            | -1.87 | 9.37E-04 | 0.0075 |
| AC008758.2       | -1.87 | 1.06E-02 | 0.0297 |
| EGFL6            | -1.87 | 1.86E-02 | 0.0438 |
| NHSL2            | -1.87 | 3.47E-03 | 0.0148 |
| RN7SKP36         | -1.87 | 7.70E-03 | 0.0241 |
| PHF1             | -1.88 | 3.43E-04 | 0.0048 |
| TAPT1-AS1        | -1.88 | 5.11E-03 | 0.0187 |
| VIM              | -1.88 | 1.76E-03 | 0.0102 |
| ATP8A2           | -1.88 | 1.20E-02 | 0.0322 |
| PPDPF            | -1.88 | 4.13E-03 | 0.0164 |
| ENST000003552800 | -1.88 | 3.92E-03 | 0.0160 |
| HDAC4            | -1.88 | 1.04E-03 | 0.0078 |
| SH3BP5           | -1.88 | 1.70E-03 | 0.0101 |
| SLC6A4           | -1.88 | 5.08E-03 | 0.0187 |
| ITPKB-IT1        | -1.88 | 9.60E-03 | 0.0278 |
| CD84             | -1.88 | 9.14E-04 | 0.0074 |
| AC006518.2       | -1.88 | 3.87E-03 | 0.0158 |
| AC006518.6       | -1.88 | 3.87E-03 | 0.0158 |
| AC244197.3       | -1.88 | 9.06E-03 | 0.0268 |
| ENST000002681840 | -1.88 | 2.77E-03 | 0.0132 |
| AL359752.1       | -1.89 | 1.93E-03 | 0.0107 |
| AC124312.1       | -1.89 | 5.16E-03 | 0.0188 |

|                  |       |          |        |
|------------------|-------|----------|--------|
| HAS3             | -1.89 | 1.06E-02 | 0.0297 |
| AC068790.3       | -1.89 | 8.74E-03 | 0.0262 |
| LINC00882        | -1.89 | 5.89E-03 | 0.0204 |
| GRAP             | -1.89 | 1.08E-04 | 0.0033 |
| AC008574.1       | -1.89 | 7.50E-03 | 0.0237 |
| AC124312.3       | -1.89 | 8.62E-04 | 0.0072 |
| COL8A1           | -1.89 | 6.15E-03 | 0.0210 |
| N4BP2L2-IT2      | -1.89 | 1.44E-04 | 0.0036 |
| LINC00672        | -1.90 | 4.43E-04 | 0.0053 |
| LZTS3            | -1.90 | 7.17E-03 | 0.0231 |
| SYTL1            | -1.90 | 1.25E-04 | 0.0035 |
| ACVR2A           | -1.90 | 2.73E-03 | 0.0131 |
| SATB1-AS1        | -1.90 | 7.70E-04 | 0.0068 |
| RFX4             | -1.90 | 1.62E-02 | 0.0396 |
| AC015911.3       | -1.90 | 2.56E-03 | 0.0126 |
| ZNF879           | -1.90 | 3.15E-03 | 0.0141 |
| SPSB3            | -1.90 | 1.19E-03 | 0.0083 |
| AC011476.3       | -1.90 | 1.26E-02 | 0.0333 |
| HTN1             | -1.90 | 3.39E-04 | 0.0048 |
| AC084782.1       | -1.90 | 7.60E-04 | 0.0067 |
| GIMAP1-GIMAP5    | -1.90 | 2.03E-04 | 0.0040 |
| ENST000003468320 | -1.90 | 1.14E-03 | 0.0082 |
| ARL4C            | -1.90 | 9.42E-03 | 0.0274 |
| FGF7P6           | -1.90 | 5.31E-03 | 0.0191 |
| CACNA1C-AS1      | -1.91 | 8.78E-03 | 0.0263 |
| AC004706.1       | -1.91 | 2.31E-03 | 0.0119 |
| MX2              | -1.91 | 1.49E-04 | 0.0036 |
| LINC00894        | -1.91 | 5.88E-03 | 0.0204 |
| AC037459.3       | -1.91 | 2.41E-03 | 0.0122 |
| NPM1P40          | -1.91 | 6.25E-04 | 0.0062 |
| SLC12A6          | -1.91 | 1.38E-03 | 0.0090 |
| AL360270.1       | -1.91 | 5.92E-03 | 0.0205 |
| HTRA4            | -1.91 | 3.91E-04 | 0.0050 |
| GIMAP4           | -1.91 | 1.26E-04 | 0.0035 |
| BST1             | -1.91 | 3.64E-03 | 0.0153 |
| AC006359.3       | -1.91 | 3.51E-03 | 0.0149 |
| BBS2             | -1.92 | 7.33E-04 | 0.0066 |
| ITM2B            | -1.92 | 1.74E-04 | 0.0038 |
| LINC00824        | -1.92 | 6.39E-03 | 0.0215 |
| ATXN8OS          | -1.92 | 4.65E-03 | 0.0177 |
| PYHIN1           | -1.92 | 1.81E-03 | 0.0104 |
| AC092683.1       | -1.92 | 1.03E-04 | 0.0033 |
| ENST000003222721 | -1.92 | 1.19E-03 | 0.0083 |
| C1QTNF9          | -1.92 | 1.80E-02 | 0.0428 |
| GUSBP11          | -1.92 | 1.69E-03 | 0.0101 |
| LINC00324        | -1.92 | 3.29E-03 | 0.0144 |
| SFRP4            | -1.93 | 1.22E-02 | 0.0327 |
| CCDC92           | -1.93 | 7.56E-04 | 0.0067 |
| AL359641.1       | -1.93 | 2.03E-03 | 0.0110 |
| GALT             | -1.93 | 3.83E-04 | 0.0050 |

|                  |       |          |        |
|------------------|-------|----------|--------|
| TRAJ30           | -1.93 | 2.02E-03 | 0.0110 |
| VPS37B           | -1.93 | 3.53E-04 | 0.0048 |
| DIRC2            | -1.93 | 2.98E-04 | 0.0046 |
| LINC01787        | -1.93 | 7.88E-03 | 0.0245 |
| AC134508.1       | -1.93 | 1.98E-03 | 0.0109 |
| PDE3A            | -1.93 | 1.09E-03 | 0.0080 |
| SINHCAFP3        | -1.93 | 3.93E-04 | 0.0050 |
| ITGA6-AS1        | -1.93 | 1.99E-02 | 0.0460 |
| AL117342.1       | -1.93 | 9.25E-03 | 0.0271 |
| AC005534.1       | -1.93 | 1.02E-02 | 0.0289 |
| EZH1             | -1.93 | 1.87E-04 | 0.0039 |
| CCDC102B         | -1.93 | 1.91E-03 | 0.0107 |
| AP002026.1       | -1.94 | 4.68E-03 | 0.0178 |
| ENST000003109580 | -1.94 | 3.24E-03 | 0.0142 |
| AC116351.1       | -1.94 | 1.00E-03 | 0.0077 |
| AC116351.3       | -1.94 | 1.00E-03 | 0.0077 |
| SCML2P2          | -1.94 | 8.31E-03 | 0.0254 |
| RN7SL246P        | -1.94 | 1.33E-02 | 0.0346 |
| BCL9L            | -1.94 | 4.05E-03 | 0.0162 |
| AC093157.1       | -1.94 | 1.61E-04 | 0.0037 |
| AC011287.2       | -1.94 | 5.65E-04 | 0.0059 |
| BTN3A1           | -1.94 | 1.45E-02 | 0.0367 |
| SYNPO2           | -1.95 | 6.47E-04 | 0.0063 |
| LINC01422        | -1.95 | 4.11E-03 | 0.0164 |
| AC005070.3       | -1.95 | 1.46E-03 | 0.0093 |
| MIR29B2CHG       | -1.95 | 6.03E-04 | 0.0061 |
| AC007666.1       | -1.95 | 2.27E-03 | 0.0118 |
| AC011816.2       | -1.95 | 3.89E-03 | 0.0159 |
| AC007620.2       | -1.95 | 4.70E-04 | 0.0054 |
| ACTA2-AS1        | -1.95 | 4.01E-03 | 0.0162 |
| HMGB1P3          | -1.95 | 7.54E-03 | 0.0238 |
| TRGV10           | -1.95 | 1.66E-02 | 0.0404 |
| INPP4A           | -1.95 | 2.50E-04 | 0.0043 |
| ADCY10           | -1.95 | 7.19E-03 | 0.0231 |
| LNCTAM34A        | -1.95 | 1.47E-03 | 0.0093 |
| ZNF480           | -1.95 | 1.03E-03 | 0.0078 |
| CEP68            | -1.96 | 1.24E-03 | 0.0085 |
| AC008669.1       | -1.96 | 1.19E-03 | 0.0083 |
| VN1R83P          | -1.96 | 2.19E-03 | 0.0115 |
| ENST000003410111 | -1.96 | 1.84E-02 | 0.0434 |
| GTF2IRD2         | -1.96 | 1.86E-03 | 0.0105 |
| ENST000003495330 | -1.96 | 1.34E-02 | 0.0347 |
| ANKRD20A8P       | -1.96 | 1.44E-02 | 0.0365 |
| NPIP9            | -1.96 | 1.46E-03 | 0.0093 |
| AL139317.3       | -1.96 | 2.85E-03 | 0.0134 |
| TMOD2            | -1.96 | 2.40E-04 | 0.0042 |
| AC097662.1       | -1.96 | 1.65E-02 | 0.0401 |
| AL137244.1       | -1.96 | 9.06E-03 | 0.0268 |
| MT-RNR2          | -1.96 | 1.69E-02 | 0.0409 |
| CYB561D1         | -1.96 | 1.74E-03 | 0.0102 |

|                  |       |          |        |
|------------------|-------|----------|--------|
| AL355312.2       | -1.97 | 1.60E-03 | 0.0098 |
| PDE7A            | -1.97 | 3.77E-04 | 0.0050 |
| AL050343.1       | -1.97 | 5.92E-03 | 0.0205 |
| AC073476.3       | -1.97 | 9.75E-03 | 0.0281 |
| GSDMB            | -1.97 | 2.74E-03 | 0.0131 |
| AC010680.1       | -1.97 | 7.59E-03 | 0.0239 |
| CREG2            | -1.97 | 5.13E-03 | 0.0187 |
| ENST000003208920 | -1.97 | 1.89E-03 | 0.0106 |
| PTPRC            | -1.97 | 2.94E-04 | 0.0045 |
| SEMA6C           | -1.97 | 6.70E-03 | 0.0222 |
| FAM210B          | -1.97 | 1.25E-04 | 0.0035 |
| AL356599.1       | -1.97 | 2.77E-04 | 0.0044 |
| OSTN-AS1         | -1.97 | 7.00E-03 | 0.0228 |
| AC011825.3       | -1.98 | 2.87E-03 | 0.0134 |
| AC139720.1       | -1.98 | 1.48E-03 | 0.0093 |
| PARP4            | -1.98 | 8.62E-05 | 0.0030 |
| FRG1GP           | -1.98 | 9.46E-03 | 0.0275 |
| AC026803.1       | -1.98 | 7.35E-03 | 0.0234 |
| THEMIS           | -1.98 | 6.49E-04 | 0.0063 |
| AC005674.2       | -1.98 | 3.53E-03 | 0.0150 |
| PDE4B            | -1.98 | 3.07E-04 | 0.0046 |
| AC018644.1       | -1.99 | 6.73E-04 | 0.0064 |
| ENST000003571860 | -1.99 | 5.68E-03 | 0.0200 |
| ENST000003515780 | -1.99 | 9.51E-04 | 0.0076 |
| ZNF555           | -1.99 | 2.11E-04 | 0.0041 |
| DOCK9            | -1.99 | 3.62E-04 | 0.0049 |
| ZHX2             | -1.99 | 6.20E-04 | 0.0062 |
| SLC12A7          | -2.00 | 8.64E-04 | 0.0072 |
| LINC00476        | -2.00 | 2.05E-03 | 0.0111 |
| RPL11P3          | -2.00 | 4.03E-04 | 0.0051 |
| AC027020.2       | -2.00 | 4.79E-03 | 0.0180 |
| ENST000003240520 | -2.00 | 1.03E-02 | 0.0291 |
| AC027763.1       | -2.00 | 9.27E-03 | 0.0271 |
| ZNF101P2         | -2.00 | 3.49E-03 | 0.0149 |
| RIMBP3           | -2.00 | 5.60E-03 | 0.0198 |
| SLC46A3          | -2.00 | 1.49E-02 | 0.0373 |
| AC120498.9       | -2.00 | 1.41E-02 | 0.0360 |
| ZNF641           | -2.01 | 1.52E-04 | 0.0036 |
| NPR3             | -2.01 | 2.10E-02 | 0.0479 |
| PTPRCAP          | -2.01 | 4.13E-03 | 0.0164 |
| CASTOR3          | -2.01 | 1.93E-03 | 0.0107 |
| ENST000002947371 | -2.01 | 1.29E-02 | 0.0339 |
| AC006978.1       | -2.01 | 4.97E-04 | 0.0056 |
| AC093330.1       | -2.01 | 7.23E-03 | 0.0232 |
| ENST000002563244 | -2.01 | 1.01E-02 | 0.0287 |
| TRAJ48           | -2.01 | 7.65E-04 | 0.0068 |
| LINC00599        | -2.01 | 1.19E-02 | 0.0321 |
| MT-RNR1          | -2.01 | 9.73E-03 | 0.0281 |
| MIR181A1HG       | -2.01 | 2.77E-03 | 0.0132 |
| SNRPEP9          | -2.02 | 6.52E-03 | 0.0218 |

|                  |       |          |        |
|------------------|-------|----------|--------|
| PECAM1           | -2.02 | 1.81E-04 | 0.0039 |
| SLC8B1           | -2.03 | 3.01E-04 | 0.0046 |
| RCBTB2           | -2.03 | 7.05E-04 | 0.0065 |
| CYP4V2           | -2.03 | 2.23E-04 | 0.0041 |
| AC006960.3       | -2.03 | 1.92E-03 | 0.0107 |
| DNAH1            | -2.03 | 2.34E-04 | 0.0042 |
| AL359220.1       | -2.03 | 9.74E-04 | 0.0076 |
| ISG20            | -2.04 | 2.88E-04 | 0.0045 |
| ENST000002361921 | -2.04 | 3.33E-04 | 0.0047 |
| ACTG1P9          | -2.04 | 6.50E-03 | 0.0218 |
| HLA-V            | -2.05 | 2.12E-02 | 0.0482 |
| ROR1-AS1         | -2.05 | 2.29E-04 | 0.0042 |
| MIATNB           | -2.05 | 2.37E-04 | 0.0042 |
| TRAM2            | -2.05 | 4.43E-04 | 0.0053 |
| MIR663A          | -2.05 | 7.12E-03 | 0.0230 |
| AC048341.1       | -2.05 | 1.16E-03 | 0.0083 |
| TMEM184A         | -2.05 | 3.09E-03 | 0.0140 |
| PRKCQ-AS1        | -2.05 | 7.03E-04 | 0.0065 |
| CYP8B1           | -2.05 | 5.74E-03 | 0.0201 |
| AC110615.1       | -2.05 | 8.17E-03 | 0.0251 |
| AL512306.3       | -2.05 | 1.37E-02 | 0.0352 |
| LINC01320        | -2.05 | 3.05E-03 | 0.0138 |
| Z82206.1         | -2.06 | 8.16E-04 | 0.0070 |
| TMEM71           | -2.06 | 1.05E-03 | 0.0079 |
| ENST000003313431 | -2.06 | 4.87E-03 | 0.0182 |
| AKTIP            | -2.06 | 2.72E-04 | 0.0044 |
| ADRB2            | -2.06 | 7.44E-03 | 0.0236 |
| MAST3            | -2.06 | 4.79E-03 | 0.0180 |
| C8orf31          | -2.06 | 9.95E-03 | 0.0285 |
| SLC6A16          | -2.06 | 4.52E-03 | 0.0174 |
| DGCR9            | -2.06 | 7.70E-03 | 0.0242 |
| AC244216.3       | -2.06 | 3.19E-03 | 0.0141 |
| AC245056.4       | -2.06 | 3.19E-03 | 0.0141 |
| AC245056.5       | -2.06 | 3.19E-03 | 0.0141 |
| TSPAN14          | -2.06 | 3.36E-03 | 0.0146 |
| LINC02019        | -2.07 | 3.63E-03 | 0.0152 |
| ENST000002472262 | -2.07 | 1.27E-02 | 0.0335 |
| MIRLET7BHG       | -2.07 | 1.11E-03 | 0.0081 |
| OSTM1            | -2.07 | 1.69E-04 | 0.0038 |
| LSM14B           | -2.07 | 1.64E-03 | 0.0099 |
| CCDC121          | -2.07 | 2.25E-03 | 0.0117 |
| GPRASP1          | -2.07 | 2.02E-04 | 0.0040 |
| C16orf54         | -2.07 | 3.66E-04 | 0.0049 |
| ABCC2            | -2.07 | 6.19E-03 | 0.0211 |
| AL583810.1       | -2.07 | 7.88E-03 | 0.0245 |
| AC244034.2       | -2.07 | 1.14E-03 | 0.0082 |
| AC092656.1       | -2.07 | 4.52E-04 | 0.0054 |
| AL355574.1       | -2.07 | 1.86E-02 | 0.0438 |
| STMN3            | -2.07 | 1.91E-03 | 0.0107 |
| HRAT17           | -2.08 | 7.06E-03 | 0.0229 |

|                  |       |          |        |
|------------------|-------|----------|--------|
| GABARAPL1        | -2.08 | 1.41E-03 | 0.0091 |
| ZNF235           | -2.08 | 9.61E-05 | 0.0031 |
| AC009152.1       | -2.08 | 3.16E-03 | 0.0141 |
| LRRC63           | -2.08 | 1.59E-02 | 0.0391 |
| SNRK             | -2.08 | 3.52E-03 | 0.0150 |
| TPM2             | -2.08 | 1.83E-03 | 0.0104 |
| SH3BP5-AS1       | -2.08 | 2.16E-03 | 0.0114 |
| TTC21A           | -2.08 | 2.18E-02 | 0.0491 |
| AC027544.2       | -2.08 | 1.23E-02 | 0.0329 |
| LINC00298        | -2.08 | 1.23E-02 | 0.0329 |
| EFCAB13          | -2.08 | 1.84E-03 | 0.0105 |
| AC078795.2       | -2.08 | 4.25E-03 | 0.0167 |
| SMIM14           | -2.08 | 9.38E-04 | 0.0075 |
| AC018868.2       | -2.08 | 3.76E-03 | 0.0156 |
| TMEM150A         | -2.08 | 2.03E-03 | 0.0110 |
| KCTD7            | -2.08 | 3.64E-04 | 0.0049 |
| AC004865.2       | -2.09 | 1.08E-02 | 0.0302 |
| AL121845.3       | -2.09 | 9.21E-04 | 0.0075 |
| ARRDC3           | -2.09 | 3.79E-04 | 0.0050 |
| AC244230.2       | -2.09 | 2.67E-03 | 0.0129 |
| NLRP6            | -2.09 | 1.32E-02 | 0.0343 |
| AC084824.3       | -2.09 | 1.34E-02 | 0.0347 |
| ENST000003082341 | -2.09 | 1.02E-03 | 0.0078 |
| RNU6-60P         | -2.09 | 8.31E-03 | 0.0254 |
| LINC02324        | -2.09 | 1.32E-02 | 0.0344 |
| PRNCR1           | -2.09 | 5.87E-04 | 0.0060 |
| AC241952.1       | -2.10 | 9.44E-04 | 0.0076 |
| PNPLA2           | -2.10 | 4.19E-03 | 0.0166 |
| MALINC1          | -2.10 | 3.54E-04 | 0.0048 |
| WASF3-AS1        | -2.10 | 2.94E-03 | 0.0136 |
| RNU6-638P        | -2.10 | 2.26E-03 | 0.0118 |
| REM2             | -2.10 | 6.79E-03 | 0.0224 |
| LINC01825        | -2.11 | 7.58E-03 | 0.0239 |
| AC008906.1       | -2.11 | 9.37E-04 | 0.0075 |
| DDX58            | -2.11 | 1.22E-04 | 0.0034 |
| MIR548C          | -2.11 | 7.04E-04 | 0.0065 |
| AL513325.1       | -2.11 | 8.35E-03 | 0.0254 |
| ITGA4            | -2.11 | 1.48E-04 | 0.0036 |
| PYCARD           | -2.11 | 2.95E-04 | 0.0046 |
| SULT1B1          | -2.11 | 1.92E-04 | 0.0039 |
| IRS2             | -2.11 | 2.05E-03 | 0.0111 |
| Z98884.2         | -2.12 | 4.44E-03 | 0.0172 |
| GOLGA8M          | -2.12 | 5.90E-03 | 0.0204 |
| ENST000002700011 | -2.12 | 7.81E-05 | 0.0030 |
| AC104763.1       | -2.12 | 8.25E-03 | 0.0253 |
| TNS1             | -2.12 | 9.26E-03 | 0.0271 |
| PVRIG            | -2.12 | 7.81E-03 | 0.0244 |
| TP53INP1         | -2.12 | 1.14E-03 | 0.0082 |
| FRG1FP           | -2.12 | 5.18E-03 | 0.0188 |
| BSN-DT           | -2.13 | 6.98E-03 | 0.0228 |

|                  |       |          |        |
|------------------|-------|----------|--------|
| ADAMTS1          | -2.13 | 9.07E-03 | 0.0268 |
| AL109811.2       | -2.13 | 7.35E-03 | 0.0234 |
| NEUROD2          | -2.13 | 9.42E-04 | 0.0075 |
| SAMD12           | -2.13 | 6.99E-04 | 0.0065 |
| AL512306.2       | -2.13 | 3.99E-03 | 0.0161 |
| LINC02328        | -2.13 | 2.66E-04 | 0.0044 |
| AC007620.3       | -2.13 | 1.57E-02 | 0.0387 |
| DLEC1            | -2.14 | 1.97E-03 | 0.0108 |
| KLHDC1           | -2.14 | 3.16E-04 | 0.0046 |
| LINC00528        | -2.14 | 9.61E-03 | 0.0278 |
| SNAI3            | -2.14 | 5.23E-04 | 0.0057 |
| AC010326.4       | -2.14 | 4.48E-03 | 0.0173 |
| SGK3             | -2.14 | 8.41E-05 | 0.0030 |
| TET1             | -2.14 | 2.06E-03 | 0.0111 |
| SPRY3            | -2.14 | 1.39E-03 | 0.0090 |
| AL022328.3       | -2.15 | 1.75E-02 | 0.0418 |
| RNU1-106P        | -2.15 | 1.75E-02 | 0.0418 |
| KAT2B            | -2.15 | 1.72E-03 | 0.0101 |
| CA5B             | -2.15 | 3.63E-03 | 0.0152 |
| SYCP3            | -2.15 | 7.43E-03 | 0.0236 |
| SOS1-IT1         | -2.15 | 1.54E-03 | 0.0096 |
| BNIP3P5          | -2.15 | 2.36E-03 | 0.0121 |
| AC008280.3       | -2.15 | 4.15E-03 | 0.0165 |
| DHRS4L1          | -2.15 | 1.67E-02 | 0.0405 |
| AC079921.2       | -2.15 | 4.49E-03 | 0.0173 |
| BCAS3            | -2.15 | 2.16E-04 | 0.0041 |
| ENST00000480419  | -2.15 | 3.22E-04 | 0.0047 |
| ENST000003328840 | -2.15 | 4.91E-04 | 0.0056 |
| GREM2            | -2.15 | 1.17E-02 | 0.0317 |
| IRGM             | -2.15 | 5.46E-03 | 0.0195 |
| EEF1DP7          | -2.16 | 1.21E-03 | 0.0084 |
| AP003352.1       | -2.16 | 3.79E-03 | 0.0156 |
| LINC01967        | -2.16 | 1.06E-02 | 0.0297 |
| SEPT14P19        | -2.16 | 5.16E-03 | 0.0188 |
| LMO7-AS1         | -2.16 | 4.54E-03 | 0.0175 |
| AL589642.2       | -2.16 | 1.40E-02 | 0.0358 |
| SIGIRR           | -2.16 | 1.86E-04 | 0.0039 |
| ENST000002817723 | -2.16 | 2.18E-03 | 0.0115 |
| SNORD116-24      | -2.17 | 2.02E-02 | 0.0465 |
| AGGF1P2          | -2.17 | 1.07E-02 | 0.0300 |
| ZNF763           | -2.17 | 1.30E-03 | 0.0087 |
| LINC002481       | -2.17 | 1.64E-02 | 0.0400 |
| ZNF204P          | -2.17 | 1.13E-02 | 0.0309 |
| AL353807.3       | -2.17 | 1.30E-03 | 0.0087 |
| RN7SKP56         | -2.17 | 2.99E-03 | 0.0137 |
| TTYH2            | -2.17 | 9.33E-04 | 0.0075 |
| PEG13            | -2.18 | 9.76E-03 | 0.0281 |
| LRRC6            | -2.18 | 9.49E-04 | 0.0076 |
| AC022113.1       | -2.18 | 6.89E-03 | 0.0226 |
| AL031667.3       | -2.18 | 1.10E-02 | 0.0304 |

|                  |       |          |        |
|------------------|-------|----------|--------|
| ENST000003387450 | -2.18 | 1.90E-04 | 0.0039 |
| CDKL4            | -2.18 | 1.06E-02 | 0.0297 |
| AP003715.1       | -2.18 | 1.56E-02 | 0.0387 |
| PSMD6-AS2        | -2.18 | 5.64E-04 | 0.0059 |
| CTC1             | -2.18 | 1.99E-02 | 0.0459 |
| TRBJ1-6          | -2.18 | 4.99E-03 | 0.0184 |
| ACTG1P3          | -2.19 | 2.09E-03 | 0.0112 |
| ZNF582           | -2.19 | 1.57E-03 | 0.0097 |
| FP236383.1       | -2.19 | 4.77E-04 | 0.0055 |
| FP671120.1       | -2.19 | 4.77E-04 | 0.0055 |
| AC018638.7       | -2.19 | 9.44E-03 | 0.0274 |
| ENST000002893610 | -2.19 | 2.71E-04 | 0.0044 |
| FAM117A          | -2.19 | 3.36E-04 | 0.0047 |
| LINC00205        | -2.19 | 6.92E-04 | 0.0064 |
| AC100827.4       | -2.19 | 1.65E-02 | 0.0402 |
| SLCO3A1          | -2.19 | 7.98E-03 | 0.0247 |
| PARP8            | -2.19 | 1.04E-04 | 0.0033 |
| AC125616.1       | -2.20 | 1.70E-02 | 0.0411 |
| ADAMTS17         | -2.20 | 4.91E-03 | 0.0183 |
| EMBP1            | -2.21 | 1.57E-03 | 0.0097 |
| PLEKHA1          | -2.21 | 5.89E-04 | 0.0060 |
| NLRC3            | -2.21 | 5.90E-04 | 0.0060 |
| TENT5A           | -2.21 | 2.30E-03 | 0.0119 |
| AL136038.4       | -2.21 | 2.10E-03 | 0.0113 |
| RAP2C-AS1        | -2.21 | 1.26E-03 | 0.0086 |
| APOC4            | -2.21 | 1.52E-02 | 0.0380 |
| SETP20           | -2.21 | 5.86E-03 | 0.0204 |
| LY9              | -2.22 | 1.30E-02 | 0.0339 |
| S1PR4            | -2.22 | 6.76E-04 | 0.0064 |
| AC109449.1       | -2.22 | 9.97E-03 | 0.0285 |
| SNORD116-17      | -2.22 | 3.77E-03 | 0.0156 |
| SNORD116-19      | -2.22 | 3.77E-03 | 0.0156 |
| PLG              | -2.22 | 3.06E-03 | 0.0139 |
| AC087741.1       | -2.22 | 5.30E-04 | 0.0058 |
| AL592148.3       | -2.22 | 1.61E-04 | 0.0037 |
| ANXA1            | -2.22 | 2.41E-03 | 0.0122 |
| GXYLT2           | -2.22 | 1.44E-02 | 0.0366 |
| LRRC25           | -2.22 | 1.28E-02 | 0.0338 |
| ZNF836           | -2.23 | 1.64E-04 | 0.0037 |
| ARHGAP15         | -2.23 | 2.32E-04 | 0.0042 |
| AF127577.4       | -2.23 | 2.79E-03 | 0.0132 |
| RAD51-AS1        | -2.23 | 1.26E-04 | 0.0035 |
| C1DP5            | -2.23 | 4.83E-03 | 0.0181 |
| SNHG22           | -2.23 | 1.72E-03 | 0.0101 |
| RF00017.25       | -2.23 | 6.35E-03 | 0.0214 |
| AL109933.1       | -2.23 | 5.45E-03 | 0.0195 |
| RASSF3           | -2.23 | 3.20E-04 | 0.0047 |
| AL356273.2       | -2.23 | 3.16E-03 | 0.0141 |
| RNF222           | -2.23 | 1.57E-02 | 0.0389 |
| OPCML-IT1        | -2.24 | 1.47E-03 | 0.0093 |

|                  |       |          |        |
|------------------|-------|----------|--------|
| SYTL2            | -2.24 | 4.31E-03 | 0.0169 |
| ATF7IP2          | -2.24 | 1.80E-04 | 0.0039 |
| CCT4P2           | -2.24 | 1.22E-03 | 0.0084 |
| TRPV2            | -2.24 | 5.57E-03 | 0.0197 |
| SUN2             | -2.24 | 1.88E-04 | 0.0039 |
| LIMD1-AS1        | -2.24 | 1.71E-02 | 0.0412 |
| CCDC7            | -2.24 | 1.91E-04 | 0.0039 |
| UTS2B            | -2.24 | 2.08E-03 | 0.0112 |
| FAM102A          | -2.24 | 3.59E-04 | 0.0049 |
| LCMT1-AS2        | -2.25 | 1.78E-02 | 0.0425 |
| FRAT1            | -2.25 | 1.23E-03 | 0.0085 |
| TRAT1            | -2.25 | 3.67E-04 | 0.0049 |
| ZNF69            | -2.25 | 9.34E-03 | 0.0273 |
| AC026356.2       | -2.25 | 1.18E-03 | 0.0083 |
| TOM1L2           | -2.25 | 5.17E-04 | 0.0057 |
| EPSTI1           | -2.25 | 6.86E-03 | 0.0225 |
| HELZ2            | -2.26 | 2.10E-03 | 0.0113 |
| LIMD2            | -2.26 | 1.40E-04 | 0.0036 |
| SNPH             | -2.26 | 3.39E-03 | 0.0146 |
| ENST000003474660 | -2.26 | 2.75E-03 | 0.0131 |
| RN7SL258P        | -2.26 | 3.50E-03 | 0.0149 |
| ENST000003193630 | -2.26 | 2.45E-04 | 0.0042 |
| AC079781.5       | -2.26 | 8.89E-04 | 0.0073 |
| AC008676.1       | -2.26 | 9.23E-03 | 0.0271 |
| TRIM62           | -2.27 | 1.24E-02 | 0.0330 |
| AC023908.3       | -2.27 | 3.69E-03 | 0.0154 |
| APBA2            | -2.27 | 2.89E-03 | 0.0135 |
| ITGB7            | -2.27 | 3.09E-04 | 0.0046 |
| DISC1            | -2.27 | 6.91E-04 | 0.0064 |
| AL138694.1       | -2.27 | 3.54E-03 | 0.0150 |
| SKINT1L          | -2.27 | 3.65E-04 | 0.0049 |
| FBXO32           | -2.27 | 1.19E-04 | 0.0034 |
| AL390195.2       | -2.28 | 6.11E-03 | 0.0209 |
| PARP15           | -2.28 | 6.30E-04 | 0.0062 |
| XYLT1            | -2.28 | 1.29E-03 | 0.0087 |
| CAPS             | -2.28 | 1.11E-04 | 0.0033 |
| FGD3             | -2.28 | 1.04E-04 | 0.0033 |
| PELI2            | -2.28 | 3.39E-03 | 0.0146 |
| AL513534.1       | -2.28 | 3.23E-04 | 0.0047 |
| SHISAL2A         | -2.28 | 1.90E-03 | 0.0106 |
| C5orf56          | -2.28 | 3.16E-04 | 0.0046 |
| AL139415.1       | -2.28 | 6.40E-04 | 0.0062 |
| AC122710.2       | -2.29 | 1.94E-03 | 0.0107 |
| AC109454.2       | -2.29 | 3.11E-03 | 0.0140 |
| NRBP2            | -2.29 | 2.71E-04 | 0.0044 |
| CALCOCO1         | -2.29 | 2.12E-04 | 0.0041 |
| S1PR1            | -2.29 | 4.32E-03 | 0.0169 |
| TPRXL            | -2.29 | 2.68E-04 | 0.0044 |
| TCEANC           | -2.29 | 4.45E-04 | 0.0053 |
| HEATR6           | -2.29 | 3.28E-03 | 0.0144 |

|                  |       |          |        |
|------------------|-------|----------|--------|
| ENST000002957560 | -2.30 | 3.32E-03 | 0.0145 |
| AC008014.1       | -2.30 | 8.28E-04 | 0.0071 |
| Z93930.3         | -2.30 | 5.22E-04 | 0.0057 |
| WDR81            | -2.30 | 5.79E-05 | 0.0028 |
| ACKR3            | -2.31 | 2.91E-03 | 0.0135 |
| AC084036.1       | -2.31 | 9.04E-04 | 0.0074 |
| FAM214A          | -2.31 | 5.65E-05 | 0.0028 |
| AC069281.2       | -2.31 | 2.65E-03 | 0.0128 |
| CHRM3-AS2        | -2.31 | 1.70E-03 | 0.0101 |
| TMTC1            | -2.31 | 1.48E-02 | 0.0371 |
| RASA2-IT1        | -2.32 | 1.44E-02 | 0.0365 |
| DYRK2            | -2.32 | 1.68E-04 | 0.0038 |
| WHAMMP2          | -2.32 | 1.98E-04 | 0.0040 |
| AC133552.4       | -2.32 | 3.05E-03 | 0.0139 |
| ERBB3            | -2.32 | 2.99E-03 | 0.0137 |
| AC011939.3       | -2.32 | 6.52E-03 | 0.0218 |
| NLRP1            | -2.32 | 1.18E-04 | 0.0034 |
| ENST000003382572 | -2.32 | 4.50E-04 | 0.0054 |
| AC092794.1       | -2.32 | 1.66E-02 | 0.0404 |
| RAB37            | -2.32 | 3.16E-03 | 0.0141 |
| RPS6KA5          | -2.33 | 1.81E-04 | 0.0039 |
| ARMC2            | -2.33 | 3.19E-03 | 0.0141 |
| ENST00000557775  | -2.33 | 1.08E-02 | 0.0301 |
| ZNF33B           | -2.33 | 7.54E-05 | 0.0030 |
| AC015911.8       | -2.33 | 1.93E-03 | 0.0107 |
| LINC00893        | -2.34 | 8.76E-03 | 0.0262 |
| LINC01730        | -2.34 | 2.25E-03 | 0.0118 |
| TSC22D3          | -2.34 | 7.59E-04 | 0.0067 |
| AL121890.4       | -2.34 | 9.41E-03 | 0.0274 |
| PBXIP1           | -2.34 | 4.11E-04 | 0.0051 |
| DPPA4            | -2.34 | 8.27E-03 | 0.0253 |
| AC006001.2       | -2.34 | 1.34E-03 | 0.0088 |
| AC006064.2       | -2.34 | 2.07E-02 | 0.0474 |
| AXIN2            | -2.34 | 3.11E-04 | 0.0046 |
| LOXL2            | -2.34 | 7.73E-04 | 0.0068 |
| C20orf203        | -2.34 | 8.38E-03 | 0.0255 |
| ENST000003156842 | -2.34 | 2.27E-04 | 0.0041 |
| RASA3            | -2.35 | 6.50E-05 | 0.0028 |
| AMY2B            | -2.35 | 7.60E-04 | 0.0067 |
| KRT18P61         | -2.35 | 4.60E-03 | 0.0176 |
| IFIT1            | -2.35 | 4.06E-03 | 0.0163 |
| PYGM             | -2.35 | 1.26E-03 | 0.0086 |
| GSAP             | -2.35 | 7.47E-04 | 0.0067 |
| SERINC5          | -2.35 | 2.22E-04 | 0.0041 |
| LINC00092        | -2.35 | 1.31E-02 | 0.0342 |
| RPL5P13          | -2.35 | 7.03E-03 | 0.0228 |
| RPL7L1P12        | -2.36 | 3.37E-03 | 0.0146 |
| CADM2-AS1        | -2.36 | 2.90E-03 | 0.0135 |
| FAM204BP         | -2.36 | 3.78E-03 | 0.0156 |
| FAM209A          | -2.36 | 2.83E-03 | 0.0133 |

|                           |       |          |        |
|---------------------------|-------|----------|--------|
| GTF2IRD2B                 | -2.37 | 1.65E-04 | 0.0037 |
| ENST000002601971          | -2.37 | 1.82E-04 | 0.0039 |
| TNRC6C-AS1                | -2.37 | 3.92E-04 | 0.0050 |
| CDC42BPG                  | -2.37 | 2.33E-03 | 0.0120 |
| CCDC180                   | -2.37 | 6.96E-04 | 0.0065 |
| SCARB2                    | -2.38 | 7.41E-05 | 0.0029 |
| TMEM229B                  | -2.38 | 5.22E-03 | 0.0190 |
| PKMP3                     | -2.38 | 1.85E-02 | 0.0437 |
| AC138915.3                | -2.38 | 9.80E-03 | 0.0282 |
| ADCY10P1                  | -2.38 | 5.88E-04 | 0.0060 |
| PARP12                    | -2.38 | 4.19E-04 | 0.0052 |
| YPEL2                     | -2.38 | 1.02E-03 | 0.0078 |
| AC025171.3                | -2.38 | 3.56E-03 | 0.0150 |
| CHIAP2                    | -2.38 | 3.01E-03 | 0.0137 |
| AC090948.1                | -2.38 | 3.60E-04 | 0.0049 |
| AC084816.1                | -2.38 | 3.34E-04 | 0.0047 |
| CLEC18A                   | -2.38 | 3.67E-03 | 0.0153 |
| OR52N4                    | -2.38 | 5.31E-04 | 0.0058 |
| AC107980.1                | -2.38 | 7.37E-03 | 0.0235 |
| AC243686.1                | -2.38 | 7.37E-03 | 0.0235 |
| AL160408.3                | -2.38 | 7.37E-03 | 0.0235 |
| VPS9D1                    | -2.39 | 6.20E-03 | 0.0211 |
| AC025164.1                | -2.39 | 2.69E-03 | 0.0130 |
| ENST000002841650          | -2.39 | 2.25E-04 | 0.0041 |
| GVINP1                    | -2.39 | 8.13E-04 | 0.0070 |
| AC245100.4                | -2.39 | 2.73E-04 | 0.0044 |
| DSEL                      | -2.39 | 1.60E-02 | 0.0394 |
| WDR78                     | -2.40 | 9.84E-04 | 0.0077 |
| RF00026.108               | -2.40 | 2.52E-03 | 0.0125 |
| ITPK1-AS1                 | -2.40 | 2.86E-03 | 0.0134 |
| SMIM10L2A                 | -2.40 | 1.65E-03 | 0.0099 |
| ERO1B                     | -2.42 | 5.05E-04 | 0.0056 |
| AC074138.1                | -2.42 | 2.71E-04 | 0.0044 |
| AC007256.1                | -2.42 | 6.74E-03 | 0.0223 |
| AC013731.1                | -2.42 | 2.16E-04 | 0.0041 |
| ITGAM                     | -2.42 | 9.03E-03 | 0.0267 |
| AF279873.3                | -2.42 | 1.42E-02 | 0.0362 |
| LINC02109                 | -2.42 | 1.05E-02 | 0.0296 |
| LINC01609                 | -2.42 | 9.00E-04 | 0.0074 |
| ARHGAP27P1-BPTFP1-KPNA2P3 | -2.43 | 1.59E-04 | 0.0037 |
| EEF1DP2                   | -2.43 | 1.53E-03 | 0.0095 |
| AC126177.4                | -2.43 | 1.83E-02 | 0.0433 |
| AC024884.2                | -2.43 | 2.27E-03 | 0.0118 |
| KCNMB2-AS1                | -2.43 | 1.13E-02 | 0.0310 |
| FLJ42102                  | -2.43 | 1.26E-02 | 0.0334 |
| AC079922.2                | -2.43 | 4.20E-04 | 0.0052 |
| AL627309.1                | -2.44 | 1.84E-03 | 0.0105 |
| NKD1                      | -2.44 | 3.68E-04 | 0.0049 |
| ENST000003142611          | -2.44 | 6.76E-05 | 0.0029 |
| AC159540.2                | -2.45 | 8.88E-05 | 0.0031 |

|                  |       |          |        |
|------------------|-------|----------|--------|
| KCNA2            | -2.45 | 1.47E-02 | 0.0370 |
| EVL              | -2.45 | 2.19E-04 | 0.0041 |
| PPP3CB-AS1       | -2.45 | 9.91E-05 | 0.0032 |
| CAPN8            | -2.45 | 6.44E-03 | 0.0216 |
| CD180            | -2.46 | 6.39E-03 | 0.0215 |
| AL591623.1       | -2.46 | 1.52E-04 | 0.0036 |
| AC011816.1       | -2.46 | 2.79E-03 | 0.0133 |
| GPR18            | -2.46 | 5.63E-03 | 0.0198 |
| PDE3B            | -2.46 | 5.94E-04 | 0.0060 |
| RBM43            | -2.46 | 1.37E-03 | 0.0089 |
| ICAM4            | -2.46 | 4.70E-03 | 0.0178 |
| AC068134.3       | -2.47 | 1.11E-03 | 0.0080 |
| ANKRD55          | -2.47 | 5.64E-03 | 0.0199 |
| MYO1F            | -2.48 | 5.77E-05 | 0.0028 |
| AC022306.2       | -2.48 | 5.29E-03 | 0.0191 |
| GYS2             | -2.48 | 1.67E-02 | 0.0406 |
| RPS3AP29         | -2.48 | 1.72E-02 | 0.0413 |
| AC110994.2       | -2.48 | 1.94E-03 | 0.0107 |
| AC242842.1       | -2.48 | 4.32E-04 | 0.0052 |
| TLR3             | -2.48 | 3.60E-03 | 0.0152 |
| TAS2R3           | -2.48 | 5.96E-03 | 0.0206 |
| BOC              | -2.48 | 3.99E-04 | 0.0051 |
| ENST000003284030 | -2.49 | 3.03E-04 | 0.0046 |
| CDKN2B-AS1       | -2.49 | 1.01E-03 | 0.0077 |
| B3GALT4          | -2.49 | 1.07E-04 | 0.0033 |
| CAMK4            | -2.49 | 6.48E-04 | 0.0063 |
| ABCA10           | -2.49 | 1.70E-02 | 0.0411 |
| TIPARP           | -2.49 | 1.31E-04 | 0.0035 |
| TMEM86A          | -2.50 | 1.45E-02 | 0.0368 |
| RF00017.176      | -2.50 | 5.95E-03 | 0.0205 |
| ENST000003567660 | -2.50 | 9.54E-03 | 0.0277 |
| TKTL1            | -2.50 | 1.03E-03 | 0.0078 |
| AC106799.3       | -2.50 | 9.10E-03 | 0.0268 |
| NUAK2            | -2.50 | 7.22E-03 | 0.0231 |
| AC127521.1       | -2.51 | 2.15E-02 | 0.0487 |
| BIN2             | -2.51 | 3.74E-05 | 0.0023 |
| RBL2             | -2.51 | 7.40E-05 | 0.0029 |
| ENST000002762040 | -2.51 | 4.59E-05 | 0.0025 |
| AC011379.2       | -2.51 | 2.15E-04 | 0.0041 |
| AC015911.4       | -2.51 | 3.65E-04 | 0.0049 |
| AC055822.1       | -2.51 | 1.39E-03 | 0.0090 |
| AL034550.2       | -2.52 | 3.11E-03 | 0.0140 |
| AC006369.1       | -2.52 | 2.06E-03 | 0.0111 |
| AC240274.1       | -2.52 | 1.01E-02 | 0.0287 |
| GBP3             | -2.52 | 1.08E-04 | 0.0033 |
| CFP              | -2.52 | 3.81E-04 | 0.0050 |
| AC104825.1       | -2.52 | 8.19E-04 | 0.0070 |
| ENST000002779002 | -2.52 | 2.69E-04 | 0.0044 |
| OVGP1            | -2.52 | 5.10E-04 | 0.0056 |
| CEACAM1          | -2.52 | 1.59E-02 | 0.0391 |

|                  |       |          |        |
|------------------|-------|----------|--------|
| LINC02009        | -2.52 | 4.91E-03 | 0.0183 |
| FHIT             | -2.52 | 5.96E-05 | 0.0028 |
| ENST000002532701 | -2.53 | 3.10E-04 | 0.0046 |
| AC010619.2       | -2.53 | 9.16E-03 | 0.0270 |
| OBSCN-AS1        | -2.53 | 1.51E-02 | 0.0378 |
| CHMP7            | -2.54 | 9.44E-05 | 0.0031 |
| AL157935.2       | -2.54 | 1.26E-03 | 0.0086 |
| AC092652.3       | -2.54 | 2.13E-04 | 0.0041 |
| KIF4CP           | -2.55 | 7.87E-03 | 0.0245 |
| CDC14A           | -2.55 | 1.17E-04 | 0.0034 |
| ZMYM1            | -2.55 | 9.88E-04 | 0.0077 |
| KCNA3            | -2.55 | 4.88E-03 | 0.0182 |
| AC009133.3       | -2.56 | 1.73E-03 | 0.0102 |
| SORL1            | -2.56 | 3.68E-04 | 0.0049 |
| TTN              | -2.56 | 1.57E-04 | 0.0037 |
| AC091488.1       | -2.56 | 1.05E-02 | 0.0295 |
| AC011632.1       | -2.57 | 5.30E-03 | 0.0191 |
| LINC01138        | -2.57 | 1.93E-04 | 0.0039 |
| LINC02472        | -2.58 | 7.17E-04 | 0.0065 |
| ENST000003503200 | -2.58 | 4.42E-03 | 0.0172 |
| SLC4A5           | -2.58 | 1.55E-04 | 0.0036 |
| SYNE1            | -2.58 | 9.29E-04 | 0.0075 |
| PTENP1           | -2.58 | 5.00E-03 | 0.0185 |
| PRKACB           | -2.59 | 3.49E-04 | 0.0048 |
| ERP27            | -2.59 | 1.04E-04 | 0.0033 |
| LIPC             | -2.59 | 1.37E-03 | 0.0089 |
| AL365203.2       | -2.59 | 3.67E-03 | 0.0153 |
| ADD3             | -2.59 | 2.01E-04 | 0.0040 |
| AC009495.2       | -2.60 | 5.22E-03 | 0.0190 |
| DNAJC19P5        | -2.60 | 1.01E-03 | 0.0078 |
| CTSO             | -2.60 | 3.61E-04 | 0.0049 |
| AC110792.3       | -2.60 | 7.26E-03 | 0.0232 |
| LINC00920        | -2.61 | 4.50E-04 | 0.0054 |
| AC092681.3       | -2.61 | 1.08E-02 | 0.0302 |
| CTSF             | -2.61 | 1.99E-03 | 0.0109 |
| AC139887.4       | -2.61 | 6.68E-03 | 0.0222 |
| AC138761.3       | -2.62 | 1.83E-03 | 0.0104 |
| RPSAP48          | -2.62 | 5.04E-04 | 0.0056 |
| AC092653.1       | -2.62 | 2.81E-03 | 0.0133 |
| MIR4473          | -2.62 | 1.35E-03 | 0.0089 |
| LINC01145        | -2.62 | 1.16E-03 | 0.0082 |
| AC245297.3       | -2.62 | 1.09E-04 | 0.0033 |
| DPYD             | -2.63 | 1.67E-04 | 0.0038 |
| RNF144B          | -2.63 | 1.11E-04 | 0.0033 |
| GPR15            | -2.63 | 1.76E-03 | 0.0102 |
| PIWIL4           | -2.63 | 1.50E-02 | 0.0376 |
| CTXND1           | -2.63 | 2.62E-03 | 0.0128 |
| RNU6-202P        | -2.64 | 7.13E-04 | 0.0065 |
| ADCY4            | -2.64 | 8.14E-04 | 0.0070 |
| AL355103.1       | -2.64 | 9.38E-03 | 0.0274 |

|                  |       |          |        |
|------------------|-------|----------|--------|
| ANKEF1           | -2.64 | 7.24E-05 | 0.0029 |
| AC245519.2       | -2.64 | 1.77E-02 | 0.0422 |
| AL135818.2       | -2.65 | 5.84E-04 | 0.0060 |
| SOS1             | -2.65 | 5.83E-04 | 0.0060 |
| LINC01891        | -2.65 | 8.72E-03 | 0.0262 |
| CDHR3            | -2.65 | 7.83E-03 | 0.0244 |
| ENST000002576261 | -2.65 | 4.06E-03 | 0.0163 |
| FAM238C          | -2.66 | 9.85E-03 | 0.0283 |
| TMEM63A          | -2.66 | 3.42E-05 | 0.0023 |
| SUDS3P1          | -2.66 | 2.55E-03 | 0.0126 |
| IL10RA           | -2.66 | 2.34E-05 | 0.0021 |
| ENST000002618371 | -2.66 | 2.03E-03 | 0.0110 |
| LINC02035        | -2.66 | 1.77E-04 | 0.0039 |
| PPEF2            | -2.66 | 7.39E-03 | 0.0235 |
| GRAPL            | -2.67 | 4.19E-04 | 0.0052 |
| NLGN3            | -2.67 | 8.28E-04 | 0.0071 |
| ATXN7            | -2.67 | 8.43E-03 | 0.0256 |
| ALS2CL           | -2.67 | 5.41E-04 | 0.0058 |
| YPEL3            | -2.68 | 6.71E-04 | 0.0064 |
| SYNE2            | -2.68 | 9.51E-05 | 0.0031 |
| AC018809.2       | -2.68 | 3.30E-03 | 0.0144 |
| ENST000003019233 | -2.68 | 4.15E-03 | 0.0165 |
| STK38            | -2.69 | 4.84E-05 | 0.0026 |
| RN7SL517P        | -2.69 | 8.32E-04 | 0.0071 |
| AC064834.1       | -2.70 | 1.34E-02 | 0.0347 |
| AC099568.1       | -2.70 | 1.58E-02 | 0.0389 |
| AC011978.2       | -2.70 | 8.47E-03 | 0.0257 |
| KLHL24           | -2.70 | 1.45E-04 | 0.0036 |
| SYNM             | -2.71 | 1.54E-02 | 0.0383 |
| CCR5             | -2.71 | 3.49E-03 | 0.0149 |
| TNNT3            | -2.71 | 3.14E-03 | 0.0141 |
| AC006299.1       | -2.71 | 9.17E-03 | 0.0270 |
| AC104162.1       | -2.72 | 8.17E-03 | 0.0251 |
| ENST000003046210 | -2.72 | 6.67E-03 | 0.0221 |
| AC025031.4       | -2.72 | 6.81E-04 | 0.0064 |
| KIAA1551         | -2.73 | 1.92E-04 | 0.0039 |
| LINC00869        | -2.73 | 1.32E-04 | 0.0035 |
| PTPRN2           | -2.73 | 4.37E-04 | 0.0053 |
| AC016957.1       | -2.73 | 5.54E-03 | 0.0196 |
| ZBTB20           | -2.74 | 2.64E-04 | 0.0044 |
| MIR374B          | -2.74 | 1.79E-02 | 0.0425 |
| AC233309.1       | -2.74 | 6.94E-03 | 0.0227 |
| RPL10P19         | -2.74 | 3.52E-03 | 0.0150 |
| TXNIP            | -2.75 | 3.85E-05 | 0.0023 |
| PTPRO            | -2.75 | 6.75E-03 | 0.0223 |
| ZNF276           | -2.75 | 2.29E-05 | 0.0020 |
| SNX18            | -2.75 | 9.43E-05 | 0.0031 |
| AL008638.3       | -2.75 | 1.15E-02 | 0.0314 |
| IPCEF1           | -2.75 | 4.36E-03 | 0.0170 |
| ENST000002959241 | -2.76 | 6.64E-05 | 0.0029 |

|                  |       |          |        |
|------------------|-------|----------|--------|
| OR52U1P          | -2.76 | 4.03E-03 | 0.0162 |
| AC073111.5       | -2.77 | 1.85E-04 | 0.0039 |
| TMEM200A         | -2.78 | 1.51E-02 | 0.0378 |
| FCMR             | -2.78 | 6.99E-04 | 0.0065 |
| AL596220.1       | -2.78 | 2.80E-04 | 0.0045 |
| P2RY8            | -2.78 | 2.21E-04 | 0.0041 |
| ENST000003184450 | -2.78 | 8.15E-05 | 0.0030 |
| CREBRF           | -2.79 | 4.17E-05 | 0.0024 |
| AL354809.1       | -2.79 | 1.59E-03 | 0.0097 |
| AC090921.1       | -2.79 | 3.12E-03 | 0.0140 |
| OR7E7P           | -2.79 | 2.64E-03 | 0.0128 |
| AC092375.2       | -2.79 | 5.02E-03 | 0.0185 |
| AC241988.2       | -2.79 | 5.02E-03 | 0.0185 |
| AL392023.2       | -2.79 | 9.79E-03 | 0.0282 |
| SULT1C4          | -2.80 | 5.50E-03 | 0.0196 |
| SELPLG           | -2.81 | 3.56E-05 | 0.0023 |
| AC092111.1       | -2.81 | 8.58E-03 | 0.0259 |
| AC239804.1       | -2.81 | 1.84E-02 | 0.0434 |
| DIP2C            | -2.81 | 1.73E-02 | 0.0414 |
| XAF1             | -2.81 | 7.91E-03 | 0.0246 |
| DPP4             | -2.82 | 5.71E-04 | 0.0059 |
| ENST000002428100 | -2.82 | 8.84E-05 | 0.0031 |
| KCNRG            | -2.82 | 9.02E-03 | 0.0267 |
| AC090186.1       | -2.83 | 5.00E-03 | 0.0185 |
| LINC00304        | -2.83 | 9.57E-03 | 0.0277 |
| AL162391.1       | -2.83 | 2.89E-03 | 0.0135 |
| SESN3            | -2.83 | 9.51E-04 | 0.0076 |
| ZNF449           | -2.84 | 6.80E-04 | 0.0064 |
| C12orf42         | -2.84 | 1.60E-02 | 0.0394 |
| SLC35D2          | -2.84 | 1.38E-04 | 0.0036 |
| AC127024.4       | -2.85 | 5.02E-03 | 0.0185 |
| AP003028.1       | -2.85 | 5.51E-03 | 0.0196 |
| CCDC141          | -2.85 | 4.41E-04 | 0.0053 |
| ZBP1             | -2.86 | 1.32E-04 | 0.0035 |
| EFHC2            | -2.87 | 7.81E-03 | 0.0243 |
| MIR2355          | -2.87 | 2.68E-03 | 0.0129 |
| ATM              | -2.87 | 1.73E-04 | 0.0038 |
| AC135050.5       | -2.87 | 1.01E-02 | 0.0288 |
| AL365361.1       | -2.87 | 1.22E-03 | 0.0084 |
| AC090950.1       | -2.88 | 4.09E-03 | 0.0164 |
| AC138207.6       | -2.88 | 5.59E-03 | 0.0198 |
| IMPG2            | -2.88 | 8.29E-05 | 0.0030 |
| AC068790.7       | -2.88 | 2.67E-03 | 0.0129 |
| AP003717.1       | -2.88 | 6.89E-03 | 0.0226 |
| AL158163.1       | -2.89 | 9.50E-05 | 0.0031 |
| SAMD9L           | -2.90 | 1.16E-03 | 0.0083 |
| SMPD1            | -2.90 | 1.06E-04 | 0.0033 |
| ABCD2            | -2.90 | 4.42E-04 | 0.0053 |
| AC138123.1       | -2.90 | 2.86E-03 | 0.0134 |
| TPTE2P5          | -2.90 | 4.25E-03 | 0.0167 |

|                  |       |          |        |
|------------------|-------|----------|--------|
| AC009035.1       | -2.91 | 2.47E-03 | 0.0124 |
| AC022079.1       | -2.91 | 3.96E-04 | 0.0050 |
| AL445649.1       | -2.91 | 4.41E-03 | 0.0172 |
| NSG1             | -2.92 | 1.89E-02 | 0.0443 |
| AL021707.8       | -2.92 | 1.25E-03 | 0.0086 |
| AKR1C8P          | -2.92 | 5.30E-03 | 0.0191 |
| FYB1             | -2.92 | 7.94E-04 | 0.0069 |
| CATSPERB         | -2.93 | 2.12E-02 | 0.0481 |
| AC036176.1       | -2.93 | 2.55E-03 | 0.0126 |
| AL158163.2       | -2.93 | 1.76E-04 | 0.0039 |
| LINC02033        | -2.93 | 8.19E-04 | 0.0070 |
| ZNF652           | -2.93 | 2.98E-05 | 0.0022 |
| SCML4            | -2.93 | 1.33E-03 | 0.0088 |
| AL158196.1       | -2.93 | 3.92E-03 | 0.0160 |
| CTSW             | -2.94 | 1.76E-03 | 0.0102 |
| LINC01336        | -2.94 | 1.02E-02 | 0.0289 |
| ENST000003387970 | -2.95 | 4.65E-04 | 0.0054 |
| AC004492.1       | -2.96 | 8.74E-04 | 0.0072 |
| AC004492.2       | -2.96 | 8.74E-04 | 0.0072 |
| ENST000002669430 | -2.96 | 1.20E-04 | 0.0034 |
| PLA2G2D          | -2.96 | 6.04E-03 | 0.0208 |
| STMN1P1          | -2.97 | 2.30E-03 | 0.0119 |
| SLC26A11         | -2.97 | 4.48E-03 | 0.0173 |
| TJP3             | -2.97 | 4.19E-04 | 0.0052 |
| ZNF540           | -2.98 | 2.89E-05 | 0.0022 |
| RSAD2            | -2.98 | 2.09E-02 | 0.0476 |
| E2F3P2           | -2.98 | 2.40E-03 | 0.0122 |
| AC009754.1       | -2.98 | 7.06E-04 | 0.0065 |
| RTP4             | -2.98 | 3.83E-04 | 0.0050 |
| IL11RA           | -2.98 | 7.30E-05 | 0.0029 |
| SAMD9            | -2.99 | 2.45E-04 | 0.0042 |
| ZBTB18           | -2.99 | 2.21E-04 | 0.0041 |
| FMN1             | -2.99 | 3.15E-03 | 0.0141 |
| CFH              | -2.99 | 2.23E-02 | 0.0499 |
| ZMAT1            | -3.00 | 5.39E-04 | 0.0058 |
| CARD16           | -3.00 | 6.69E-04 | 0.0064 |
| TSPAN32          | -3.00 | 4.60E-03 | 0.0176 |
| ENST000002353721 | -3.01 | 1.62E-03 | 0.0098 |
| AL359885.1       | -3.01 | 1.29E-03 | 0.0087 |
| ZNF815P          | -3.01 | 3.09E-04 | 0.0046 |
| PTPN4            | -3.02 | 2.42E-05 | 0.0021 |
| LOXHD1           | -3.03 | 3.80E-03 | 0.0157 |
| ENST000003263511 | -3.03 | 6.13E-03 | 0.0209 |
| AC241640.1       | -3.04 | 3.75E-03 | 0.0156 |
| PYROXD2          | -3.05 | 1.68E-04 | 0.0038 |
| KPNA2P3          | -3.05 | 7.77E-05 | 0.0030 |
| GIMAP1           | -3.06 | 7.67E-05 | 0.0030 |
| LTB              | -3.07 | 1.43E-04 | 0.0036 |
| ZNF564           | -3.07 | 7.43E-03 | 0.0236 |
| C1GALT1P1        | -3.07 | 9.03E-04 | 0.0074 |

|                  |       |          |        |
|------------------|-------|----------|--------|
| PCAT19           | -3.07 | 9.70E-04 | 0.0076 |
| COLQ             | -3.08 | 8.78E-05 | 0.0031 |
| AZIN2            | -3.08 | 1.83E-02 | 0.0434 |
| AC011450.1       | -3.08 | 3.58E-03 | 0.0151 |
| AC005332.2       | -3.08 | 5.31E-04 | 0.0058 |
| CCDC146          | -3.09 | 1.66E-04 | 0.0038 |
| TCP11L2          | -3.09 | 1.27E-04 | 0.0035 |
| TMEM191A         | -3.10 | 3.03E-03 | 0.0138 |
| NMRAL2P          | -3.10 | 4.27E-03 | 0.0168 |
| HSPE1P13         | -3.10 | 1.13E-03 | 0.0081 |
| VMAC             | -3.11 | 1.33E-04 | 0.0035 |
| ENST000002824881 | -3.11 | 5.64E-04 | 0.0059 |
| AC006023.2       | -3.12 | 2.15E-03 | 0.0114 |
| AC078962.1       | -3.13 | 3.42E-03 | 0.0147 |
| EVI2B            | -3.13 | 1.69E-03 | 0.0101 |
| AC027373.1       | -3.14 | 8.39E-05 | 0.0030 |
| RPL21P44         | -3.15 | 6.88E-04 | 0.0064 |
| AL591895.1       | -3.15 | 7.04E-04 | 0.0065 |
| LINC01876        | -3.15 | 1.02E-02 | 0.0289 |
| MGC16275         | -3.16 | 8.42E-03 | 0.0256 |
| AC016957.2       | -3.16 | 1.85E-04 | 0.0039 |
| IDUA             | -3.16 | 4.70E-04 | 0.0054 |
| ENST000003615440 | -3.16 | 1.31E-03 | 0.0087 |
| LPAR6            | -3.16 | 1.08E-05 | 0.0017 |
| ANTXR2           | -3.17 | 3.56E-04 | 0.0048 |
| AC040162.3       | -3.17 | 1.64E-03 | 0.0099 |
| SPSB2            | -3.17 | 1.29E-03 | 0.0087 |
| SAMHD1           | -3.17 | 1.28E-04 | 0.0035 |
| AL157762.1       | -3.18 | 2.70E-03 | 0.0130 |
| AC012651.1       | -3.18 | 1.47E-03 | 0.0093 |
| TXK              | -3.19 | 1.25E-05 | 0.0018 |
| PTTG2            | -3.19 | 2.65E-03 | 0.0129 |
| LRRN3            | -3.19 | 1.34E-05 | 0.0018 |
| MAP1A            | -3.19 | 1.31E-02 | 0.0342 |
| EAF1-AS1         | -3.20 | 1.52E-02 | 0.0379 |
| AC025171.5       | -3.21 | 6.26E-03 | 0.0212 |
| LINC01176        | -3.21 | 6.70E-04 | 0.0064 |
| AL773551.1       | -3.23 | 1.89E-02 | 0.0442 |
| AC000068.3       | -3.23 | 6.96E-03 | 0.0227 |
| TMEM45B          | -3.24 | 2.94E-04 | 0.0045 |
| LINC02361        | -3.25 | 3.88E-04 | 0.0050 |
| HSPE1P3          | -3.26 | 1.34E-03 | 0.0088 |
| HIGD1AP14        | -3.26 | 9.43E-03 | 0.0274 |
| HAVCR1           | -3.26 | 5.83E-04 | 0.0060 |
| AC048382.6       | -3.27 | 5.31E-03 | 0.0191 |
| AC025171.2       | -3.27 | 1.81E-04 | 0.0039 |
| AC008543.5       | -3.27 | 2.68E-03 | 0.0129 |
| PNPLA7           | -3.27 | 3.09E-03 | 0.0140 |
| MXD4             | -3.27 | 4.57E-04 | 0.0054 |
| ABCA7            | -3.28 | 3.77E-04 | 0.0050 |

|                  |       |          |        |
|------------------|-------|----------|--------|
| RNU6-807P        | -3.28 | 1.19E-03 | 0.0084 |
| GIMAP7           | -3.29 | 8.68E-05 | 0.0031 |
| PPIAL4G          | -3.30 | 5.14E-05 | 0.0027 |
| RARRES3          | -3.30 | 2.33E-04 | 0.0042 |
| GOLGA5P1         | -3.30 | 3.69E-03 | 0.0154 |
| PLCL1            | -3.32 | 1.90E-04 | 0.0039 |
| SPON1            | -3.33 | 3.46E-03 | 0.0148 |
| RNF144A          | -3.33 | 1.91E-04 | 0.0039 |
| LAIR1            | -3.34 | 1.87E-05 | 0.0020 |
| NUDT16L1         | -3.34 | 7.05E-04 | 0.0065 |
| LINC00954        | -3.34 | 1.74E-02 | 0.0418 |
| AC119044.1       | -3.35 | 2.10E-04 | 0.0040 |
| GPR61            | -3.35 | 2.45E-03 | 0.0123 |
| NR3C2            | -3.35 | 1.24E-03 | 0.0085 |
| CD96             | -3.36 | 4.02E-05 | 0.0024 |
| ENST000003056232 | -3.37 | 7.71E-03 | 0.0242 |
| IFNG-AS1         | -3.37 | 3.09E-03 | 0.0140 |
| PIK3IP1          | -3.38 | 2.24E-04 | 0.0041 |
| CUBN             | -3.39 | 3.53E-04 | 0.0048 |
| RF02271.32       | -3.39 | 2.52E-03 | 0.0125 |
| RNU6-838P        | -3.40 | 3.54E-03 | 0.0150 |
| AC114490.1       | -3.40 | 2.11E-03 | 0.0113 |
| AL391056.1       | -3.42 | 7.32E-03 | 0.0234 |
| ENST00000588041  | -3.43 | 1.07E-03 | 0.0080 |
| CEACAMP3         | -3.44 | 1.02E-03 | 0.0078 |
| AC004067.1       | -3.44 | 9.46E-04 | 0.0076 |
| GCNT4            | -3.45 | 1.38E-03 | 0.0090 |
| ZFP14            | -3.45 | 2.08E-04 | 0.0040 |
| TC2N             | -3.45 | 1.46E-04 | 0.0036 |
| AC093725.2       | -3.45 | 8.60E-04 | 0.0072 |
| AF165147.1       | -3.47 | 2.88E-03 | 0.0134 |
| C11orf21         | -3.47 | 8.40E-03 | 0.0255 |
| CNTN6            | -3.47 | 1.61E-02 | 0.0395 |
| LRFN2            | -3.47 | 1.61E-02 | 0.0395 |
| DPYD-IT1         | -3.49 | 1.17E-04 | 0.0034 |
| C16orf74         | -3.50 | 1.56E-02 | 0.0386 |
| LINC00921        | -3.50 | 2.64E-03 | 0.0128 |
| AC091180.2       | -3.51 | 1.55E-02 | 0.0385 |
| CASP1P2          | -3.51 | 1.29E-03 | 0.0087 |
| AC093726.2       | -3.51 | 9.90E-04 | 0.0077 |
| LDLRAP1          | -3.52 | 1.34E-04 | 0.0035 |
| AL591926.7       | -3.52 | 9.19E-04 | 0.0075 |
| AC134669.1       | -3.54 | 1.02E-03 | 0.0078 |
| SFR1P1           | -3.57 | 1.45E-02 | 0.0368 |
| MAN1C1           | -3.57 | 5.17E-04 | 0.0057 |
| AL391994.1       | -3.59 | 1.24E-02 | 0.0330 |
| MIR4441          | -3.59 | 1.21E-02 | 0.0325 |
| AP000977.1       | -3.60 | 5.73E-04 | 0.0059 |
| ENST000003466520 | -3.60 | 8.83E-04 | 0.0073 |
| AC055764.2       | -3.60 | 1.46E-02 | 0.0370 |

|                  |       |          |        |
|------------------|-------|----------|--------|
| AC119396.1       | -3.60 | 5.43E-05 | 0.0027 |
| NT5C3AP1         | -3.61 | 1.05E-03 | 0.0079 |
| TRBV23-1         | -3.61 | 6.09E-05 | 0.0028 |
| SMIM10L2B-AS1    | -3.61 | 1.19E-02 | 0.0321 |
| ADAMTS10         | -3.64 | 1.25E-04 | 0.0035 |
| OLFM2            | -3.64 | 4.05E-03 | 0.0163 |
| ENST000003340031 | -3.64 | 1.07E-03 | 0.0079 |
| LPAL2            | -3.65 | 1.48E-02 | 0.0372 |
| ABTB1            | -3.67 | 6.05E-03 | 0.0208 |
| ANXA2R           | -3.67 | 3.72E-04 | 0.0049 |
| AC026355.2       | -3.72 | 2.17E-02 | 0.0489 |
| CCDC89           | -3.72 | 2.17E-02 | 0.0489 |
| MED28P7          | -3.72 | 1.08E-02 | 0.0300 |
| ANTXRLP1         | -3.72 | 1.23E-04 | 0.0034 |
| C1orf162         | -3.72 | 3.21E-05 | 0.0023 |
| SLC9A9           | -3.73 | 6.26E-05 | 0.0028 |
| AC009084.1       | -3.73 | 1.03E-02 | 0.0292 |
| LINC00544        | -3.73 | 1.79E-04 | 0.0039 |
| NUTM2B           | -3.73 | 2.13E-02 | 0.0484 |
| NR1D2            | -3.74 | 5.06E-05 | 0.0026 |
| NRIR             | -3.75 | 2.13E-02 | 0.0483 |
| RAD23BP1         | -3.75 | 3.59E-04 | 0.0049 |
| HLTF-AS1         | -3.76 | 1.01E-02 | 0.0288 |
| OLFM5P           | -3.76 | 1.05E-02 | 0.0294 |
| ARHGEF11         | -3.76 | 8.55E-05 | 0.0030 |
| AC005532.2       | -3.77 | 4.82E-04 | 0.0055 |
| ENST000003430171 | -3.77 | 9.74E-04 | 0.0076 |
| AC010983.1       | -3.78 | 1.03E-03 | 0.0078 |
| AC092902.2       | -3.78 | 2.23E-02 | 0.0499 |
| LINC01163        | -3.79 | 1.76E-03 | 0.0102 |
| ST8SIA6          | -3.80 | 9.19E-03 | 0.0270 |
| AQP3             | -3.81 | 1.74E-04 | 0.0038 |
| RIPOR2           | -3.82 | 7.03E-05 | 0.0029 |
| RF00017.53       | -3.82 | 9.61E-03 | 0.0278 |
| DDX60L           | -3.83 | 1.88E-04 | 0.0039 |
| AL117350.1       | -3.83 | 8.99E-03 | 0.0267 |
| MUC20-OT1-585    | -3.84 | 5.44E-03 | 0.0194 |
| AL121839.2       | -3.84 | 4.86E-05 | 0.0026 |
| AL121839.4       | -3.84 | 4.86E-05 | 0.0026 |
| AC090948.2       | -3.86 | 7.50E-05 | 0.0030 |
| TRANK1           | -3.87 | 1.03E-03 | 0.0078 |
| ENST000003403420 | -3.88 | 3.90E-03 | 0.0159 |
| AC008878.3       | -3.88 | 4.11E-05 | 0.0024 |
| ISM1             | -3.88 | 8.62E-04 | 0.0072 |
| MEGF6            | -3.90 | 4.25E-04 | 0.0052 |
| AL357033.4       | -3.90 | 1.25E-03 | 0.0086 |
| LINC01725        | -3.90 | 1.49E-03 | 0.0094 |
| AC013468.1       | -3.92 | 4.04E-04 | 0.0051 |
| SMPD3            | -3.93 | 5.16E-03 | 0.0188 |
| VIPR1            | -3.95 | 5.09E-04 | 0.0056 |

|                  |       |          |        |
|------------------|-------|----------|--------|
| AL133355.1       | -3.95 | 1.51E-03 | 0.0094 |
| EPHA4            | -3.95 | 2.26E-04 | 0.0041 |
| SLFN5            | -3.96 | 1.28E-03 | 0.0086 |
| AL135790.1       | -3.96 | 6.17E-04 | 0.0061 |
| UBQLNL           | -3.98 | 7.57E-03 | 0.0239 |
| TNNI3K           | -3.98 | 7.96E-03 | 0.0247 |
| TNFSF12          | -3.98 | 1.93E-02 | 0.0450 |
| AC127459.2       | -4.00 | 8.27E-03 | 0.0253 |
| AK5              | -4.00 | 2.43E-04 | 0.0042 |
| AKR1C3           | -4.02 | 3.12E-03 | 0.0140 |
| AC104964.3       | -4.04 | 1.16E-02 | 0.0316 |
| AC103810.5       | -4.06 | 8.67E-03 | 0.0260 |
| AC090948.3       | -4.07 | 9.78E-04 | 0.0077 |
| AC009690.1       | -4.08 | 1.51E-02 | 0.0377 |
| TLR1             | -4.08 | 3.80E-03 | 0.0157 |
| AC246785.2       | -4.09 | 7.73E-03 | 0.0242 |
| HERC6            | -4.10 | 2.99E-03 | 0.0137 |
| AC005842.1       | -4.10 | 2.43E-04 | 0.0042 |
| LINC01801        | -4.11 | 2.72E-03 | 0.0131 |
| HKDC1            | -4.13 | 2.36E-05 | 0.0021 |
| C13orf46         | -4.15 | 1.02E-03 | 0.0078 |
| AC121334.1       | -4.16 | 6.74E-03 | 0.0223 |
| AL357033.3       | -4.17 | 2.32E-04 | 0.0042 |
| SPATA41          | -4.17 | 7.81E-03 | 0.0243 |
| KLF3             | -4.17 | 6.41E-05 | 0.0028 |
| BTG1P1           | -4.18 | 6.34E-03 | 0.0214 |
| ENST000003429920 | -4.18 | 4.60E-04 | 0.0054 |
| AC008555.5       | -4.19 | 4.42E-03 | 0.0172 |
| AMIGO1           | -4.19 | 1.16E-02 | 0.0316 |
| LINC02591        | -4.21 | 1.86E-02 | 0.0438 |
| AKR1D1P1         | -4.21 | 9.82E-03 | 0.0283 |
| AC008555.1       | -4.21 | 9.91E-05 | 0.0032 |
| AC244260.1       | -4.21 | 5.43E-04 | 0.0058 |
| AL645568.2       | -4.21 | 1.57E-03 | 0.0097 |
| CAPN3            | -4.22 | 1.33E-02 | 0.0345 |
| LIME1            | -4.24 | 7.43E-05 | 0.0029 |
| NUTM2D           | -4.25 | 2.09E-02 | 0.0476 |
| CARD17           | -4.26 | 8.15E-04 | 0.0070 |
| AL121845.2       | -4.31 | 4.86E-05 | 0.0026 |
| LINC02390        | -4.33 | 9.41E-04 | 0.0075 |
| CTSL             | -4.37 | 6.06E-03 | 0.0208 |
| ENST000003486550 | -4.38 | 1.13E-02 | 0.0311 |
| ARRDC5           | -4.38 | 2.42E-05 | 0.0021 |
| STEAP1B          | -4.39 | 5.89E-03 | 0.0204 |
| SEC22B4P         | -4.41 | 5.88E-03 | 0.0204 |
| AC022916.1       | -4.42 | 1.30E-04 | 0.0035 |
| CACNA1C-AS2      | -4.43 | 5.32E-03 | 0.0192 |
| ADHFE1           | -4.44 | 6.32E-05 | 0.0028 |
| GOLGA7B          | -4.45 | 5.63E-04 | 0.0059 |
| AC138894.1       | -4.46 | 5.25E-03 | 0.0190 |

|                  |       |          |        |
|------------------|-------|----------|--------|
| RPL7L1P9         | -4.47 | 1.87E-03 | 0.0105 |
| ENST000003165490 | -4.50 | 3.11E-05 | 0.0022 |
| LINC01727        | -4.51 | 1.01E-02 | 0.0287 |
| LDLRAD1          | -4.51 | 1.78E-03 | 0.0103 |
| AL606491.1       | -4.51 | 1.03E-02 | 0.0291 |
| AC055748.1       | -4.52 | 3.40E-05 | 0.0023 |
| AL158210.1       | -4.52 | 1.13E-04 | 0.0033 |
| TRIB2            | -4.55 | 9.68E-05 | 0.0031 |
| MUC20-OT1-616    | -4.56 | 1.84E-03 | 0.0105 |
| ENST000003288233 | -4.56 | 5.60E-03 | 0.0198 |
| A2M-AS1          | -4.56 | 2.09E-03 | 0.0112 |
| KLRB1            | -4.57 | 9.89E-04 | 0.0077 |
| AC015722.1       | -4.57 | 1.72E-03 | 0.0101 |
| ITGA6            | -4.58 | 7.17E-03 | 0.0231 |
| ENST000003562060 | -4.60 | 1.82E-03 | 0.0104 |
| KRT73            | -4.61 | 8.22E-03 | 0.0252 |
| ENST000003322460 | -4.61 | 6.33E-04 | 0.0062 |
| CACNA1I          | -4.61 | 1.38E-03 | 0.0090 |
| DPEP2            | -4.64 | 1.15E-04 | 0.0033 |
| EDAR             | -4.66 | 1.23E-02 | 0.0328 |
| AC080162.1       | -4.67 | 1.53E-03 | 0.0095 |
| ENST000002686761 | -4.69 | 1.80E-02 | 0.0428 |
| FAM47E-STBD1     | -4.74 | 2.18E-02 | 0.0491 |
| AC103769.1       | -4.74 | 1.37E-03 | 0.0089 |
| ST6GALNAC1       | -4.76 | 1.66E-02 | 0.0404 |
| AC078927.1       | -4.76 | 1.81E-03 | 0.0104 |
| AL139123.1       | -4.78 | 1.25E-03 | 0.0086 |
| ICOS             | -4.78 | 1.58E-03 | 0.0097 |
| TENM1            | -4.80 | 1.67E-02 | 0.0405 |
| GCOM1            | -4.80 | 2.12E-02 | 0.0481 |
| AUTS2            | -4.88 | 1.88E-03 | 0.0106 |
| AC239800.2       | -4.89 | 1.38E-03 | 0.0090 |
| LINC02478        | -4.91 | 1.06E-03 | 0.0079 |
| PI16             | -4.94 | 8.60E-03 | 0.0259 |
| CD200R1          | -4.95 | 1.23E-03 | 0.0085 |
| ADA2             | -4.99 | 4.23E-05 | 0.0024 |
| LINC01259        | -5.01 | 3.40E-03 | 0.0147 |
| LINC01726        | -5.02 | 1.46E-03 | 0.0093 |
| SORCS3           | -5.03 | 8.66E-04 | 0.0072 |
| AC025171.4       | -5.04 | 3.77E-03 | 0.0156 |
| SNED1            | -5.07 | 1.05E-03 | 0.0079 |
| AC068790.4       | -5.09 | 8.24E-04 | 0.0070 |
| PLEKHB1          | -5.11 | 3.63E-03 | 0.0153 |
| Z98200.1         | -5.12 | 8.09E-04 | 0.0070 |
| RGMB             | -5.13 | 7.64E-04 | 0.0068 |
| GP6              | -5.14 | 7.71E-04 | 0.0068 |
| CSGALNACT1       | -5.15 | 7.01E-03 | 0.0228 |
| AC138932.1       | -5.15 | 7.48E-04 | 0.0067 |
| ENST000003180413 | -5.18 | 1.33E-03 | 0.0088 |
| ENST000003158084 | -5.19 | 1.07E-03 | 0.0080 |

|                  |       |          |        |
|------------------|-------|----------|--------|
| SAMD3            | -5.19 | 5.99E-04 | 0.0060 |
| PLXNA4           | -5.21 | 3.06E-04 | 0.0046 |
| DSC1             | -5.21 | 1.98E-03 | 0.0109 |
| MMRN1            | -5.22 | 7.48E-04 | 0.0067 |
| LINC02142        | -5.22 | 1.08E-03 | 0.0080 |
| SLC22A23         | -5.24 | 5.02E-03 | 0.0185 |
| RASGRP2          | -5.25 | 7.53E-06 | 0.0016 |
| ENST000002617260 | -5.25 | 3.17E-03 | 0.0141 |
| CCDC65           | -5.26 | 1.64E-05 | 0.0019 |
| ENST000003241940 | -5.30 | 1.57E-03 | 0.0096 |
| IGFBP3           | -5.30 | 8.88E-04 | 0.0073 |
| ENST000003417560 | -5.36 | 9.26E-04 | 0.0075 |
| OCM              | -5.45 | 1.56E-03 | 0.0096 |
| AC106795.2       | -5.45 | 5.39E-04 | 0.0058 |
| AC007952.5       | -5.45 | 1.60E-03 | 0.0098 |
| ENST000000556820 | -5.50 | 4.56E-04 | 0.0054 |
| RNF157-AS1       | -5.54 | 7.31E-03 | 0.0234 |
| AC068400.2       | -5.54 | 5.96E-04 | 0.0060 |
| FBXO39           | -5.54 | 4.14E-04 | 0.0051 |
| IL7R             | -5.54 | 1.25E-02 | 0.0332 |
| LINC00861        | -5.58 | 6.76E-06 | 0.0016 |
| IL17RA           | -5.58 | 8.15E-04 | 0.0070 |
| ENST000003617380 | -5.59 | 2.24E-03 | 0.0117 |
| ENST000002632051 | -5.59 | 6.17E-04 | 0.0061 |
| ENST000002601841 | -5.60 | 4.61E-03 | 0.0176 |
| ENST000003406600 | -5.61 | 1.38E-03 | 0.0090 |
| TSPAN18          | -5.62 | 1.10E-04 | 0.0033 |
| AC139677.1       | -5.71 | 3.69E-04 | 0.0049 |
| WNT7A            | -5.72 | 1.36E-03 | 0.0089 |
| ENST000003568871 | -5.80 | 3.20E-04 | 0.0047 |
| LINC00565        | -5.80 | 4.73E-03 | 0.0179 |
| ENST000003410121 | -5.80 | 2.75E-04 | 0.0044 |
| AC107626.1       | -5.82 | 3.45E-04 | 0.0048 |
| BORCS7-ASMT      | -5.85 | 3.00E-04 | 0.0046 |
| FGF7             | -5.85 | 1.32E-03 | 0.0087 |
| ENST000002681502 | -5.93 | 3.78E-04 | 0.0050 |
| ENST000002646900 | -5.94 | 2.69E-04 | 0.0044 |
| GZMA             | -5.95 | 7.76E-05 | 0.0030 |
| TAS2R10          | -5.96 | 2.19E-04 | 0.0041 |
| CTD1118.1        | -5.96 | 7.58E-05 | 0.0030 |
| AC233976.1       | -5.97 | 2.88E-04 | 0.0045 |
| ENST000003750250 | -5.98 | 2.51E-04 | 0.0043 |
| AL355581.1       | -5.99 | 3.88E-03 | 0.0159 |
| BX248123.1       | -6.01 | 2.94E-04 | 0.0045 |
| AC100827.3       | -6.01 | 2.18E-04 | 0.0041 |
| ENST000002653753 | -6.05 | 3.95E-04 | 0.0050 |
| ENST000002157901 | -6.17 | 1.68E-04 | 0.0038 |
| ENST000003510710 | -6.20 | 1.59E-04 | 0.0037 |
| COPS8P2          | -6.22 | 2.45E-04 | 0.0042 |
| AP002365.1       | -6.23 | 2.31E-04 | 0.0042 |

|                  |       |          |        |
|------------------|-------|----------|--------|
| ENST000003543211 | -6.24 | 3.97E-03 | 0.0161 |
| GPA33            | -6.32 | 2.26E-05 | 0.0020 |
| ENST000002538110 | -6.40 | 4.34E-04 | 0.0052 |
| ENST000002616061 | -6.44 | 1.45E-04 | 0.0036 |
| QRICH2           | -6.48 | 1.07E-04 | 0.0033 |
| RAP1GAP2         | -6.50 | 6.81E-03 | 0.0224 |
| VSIG1            | -6.54 | 1.89E-05 | 0.0020 |
| B3GALT2          | -6.71 | 1.17E-04 | 0.0034 |
| ENST000003275641 | -6.86 | 6.33E-05 | 0.0028 |
| CCR2             | -6.97 | 6.21E-04 | 0.0062 |
| ENST000002672571 | -7.06 | 3.16E-04 | 0.0046 |
| CDKN2B           | -7.17 | 5.37E-04 | 0.0058 |
| FAM19A1          | -7.19 | 3.92E-04 | 0.0050 |
| ENST000003599200 | -7.48 | 4.08E-05 | 0.0024 |
| ARMH2            | -7.54 | 2.93E-05 | 0.0022 |
| ENST000002925621 | -8.20 | 3.86E-05 | 0.0023 |
| ENST000002968590 | -8.20 | 1.42E-04 | 0.0036 |
| KLF2             | -8.61 | 7.14E-04 | 0.0065 |
| ENST000003256741 | -9.09 | 8.68E-06 | 0.0016 |
