# Supplementary material for: Human splice factors contribute to latent HIV infection in primary cell models and blood CD4+ T cells from ART-treated individuals
Source: PubMed Central journal article supplement (PMC7728277; doi:10.1371/journal.ppat.1009060), 2020-11-30
Supplement: ppat.1009060.s003.pdf [file ppat.1009060.s003.pdf]

**Table S3. List of statistically significant differentially expressed genes between unstimulated and stimulated peripheral CD4+ T cells from ART-suppressed individuals.**  
Genes are ranked by the average log2 fold change (FC).

| Gene             | FC (log2) | p value  | FDR    |
|------------------|-----------|----------|--------|
| ZBED2            | 13.31     | 8.86E-07 | 0.0008 |
| AP003472.1       | 10.78     | 2.04E-05 | 0.0012 |
| IL9              | 10.63     | 1.88E-06 | 0.0008 |
| CCL3             | 10.30     | 1.77E-04 | 0.0028 |
| LIF              | 9.96      | 1.25E-03 | 0.0073 |
| ENST000003364582 | 9.85      | 7.59E-07 | 0.0008 |
| ENST000003218051 | 9.71      | 1.06E-06 | 0.0008 |
| ENST000003069320 | 9.61      | 2.75E-06 | 0.0008 |
| ENST000003150501 | 9.30      | 5.47E-06 | 0.0009 |
| ENST000003298752 | 9.19      | 1.19E-06 | 0.0008 |
| STC2             | 9.06      | 3.11E-06 | 0.0009 |
| ENST000002533630 | 9.05      | 7.02E-06 | 0.0010 |
| ENST000003435280 | 9.03      | 3.24E-06 | 0.0009 |
| ENST000003237600 | 8.99      | 4.08E-06 | 0.0009 |
| ENST000003388911 | 8.96      | 1.48E-05 | 0.0011 |
| ENST000003083610 | 8.95      | 8.95E-06 | 0.0010 |
| IL1A             | 8.82      | 4.82E-06 | 0.0009 |
| ENST000003566570 | 8.76      | 3.99E-06 | 0.0009 |
| IL21             | 8.59      | 2.20E-04 | 0.0031 |
| GZMB             | 8.55      | 1.65E-05 | 0.0011 |
| ENST000002632741 | 8.51      | 1.90E-05 | 0.0011 |
| ENST000002947321 | 8.31      | 1.30E-04 | 0.0025 |
| ENST000003283540 | 8.22      | 1.10E-05 | 0.0010 |
| FAM72D           | 8.21      | 6.90E-04 | 0.0053 |
| ENST000002616000 | 8.21      | 2.87E-03 | 0.0118 |
| IL24             | 8.19      | 8.43E-06 | 0.0010 |
| ENST000003232744 | 8.13      | 3.89E-04 | 0.0040 |
| IL13             | 8.10      | 1.27E-05 | 0.0010 |
| ENST000003299670 | 8.09      | 7.84E-05 | 0.0020 |
| ENST000002679352 | 8.09      | 1.36E-05 | 0.0011 |
| ENST000002603831 | 8.05      | 7.33E-06 | 0.0010 |
| ENST000003127830 | 8.04      | 2.54E-05 | 0.0013 |
| ENST000003144231 | 7.97      | 7.06E-06 | 0.0010 |
| ENST000003018432 | 7.95      | 4.17E-05 | 0.0016 |
| IL1RN            | 7.88      | 1.94E-04 | 0.0030 |
| ENST000002681381 | 7.87      | 8.95E-05 | 0.0021 |
| CBSL             | 7.86      | 1.89E-04 | 0.0029 |
| EPOP             | 7.82      | 1.64E-04 | 0.0027 |
| C7orf55-LUC7L2   | 7.79      | 3.28E-05 | 0.0015 |
| EGR2             | 7.77      | 8.49E-04 | 0.0059 |
| ENST000002501240 | 7.77      | 5.45E-05 | 0.0017 |

|                  |      |          |        |
|------------------|------|----------|--------|
| HSPE1-MOB4       | 7.76 | 2.90E-05 | 0.0014 |
| ENST000003351830 | 7.76 | 1.21E-03 | 0.0072 |
| ENST000003141631 | 7.72 | 1.98E-05 | 0.0012 |
| CCL4             | 7.70 | 7.15E-06 | 0.0010 |
| ENST000002743760 | 7.65 | 4.70E-05 | 0.0016 |
| ENST000003351250 | 7.64 | 1.26E-05 | 0.0010 |
| TNFRSF8          | 7.63 | 3.98E-04 | 0.0040 |
| GPR87            | 7.62 | 1.42E-05 | 0.0011 |
| ENST000003310291 | 7.60 | 2.10E-05 | 0.0012 |
| ENST000003546750 | 7.60 | 2.16E-05 | 0.0012 |
| IL2              | 7.59 | 1.26E-06 | 0.0008 |
| NCS1             | 7.57 | 1.74E-05 | 0.0011 |
| ENST000002233360 | 7.57 | 4.75E-04 | 0.0044 |
| ENST000002848112 | 7.55 | 5.18E-03 | 0.0173 |
| ENST000003506120 | 7.49 | 1.52E-05 | 0.0011 |
| ENST000002637020 | 7.47 | 1.50E-05 | 0.0011 |
| HMSD             | 7.45 | 1.59E-05 | 0.0011 |
| ENST000002568760 | 7.45 | 7.29E-07 | 0.0008 |
| IL17F            | 7.44 | 1.76E-04 | 0.0028 |
| CAVIN3           | 7.44 | 1.85E-04 | 0.0029 |
| CCL20            | 7.41 | 7.00E-05 | 0.0019 |
| DGKI             | 7.41 | 3.56E-04 | 0.0038 |
| ENST000003000272 | 7.38 | 4.09E-04 | 0.0041 |
| ENST000003016341 | 7.36 | 4.53E-04 | 0.0043 |
| FAM72C           | 7.36 | 6.00E-04 | 0.0049 |
| KIF20A           | 7.35 | 9.03E-07 | 0.0008 |
| EIF4EP2          | 7.34 | 1.19E-04 | 0.0024 |
| ENST000002288433 | 7.34 | 3.60E-05 | 0.0015 |
| RF00017.13       | 7.29 | 2.14E-04 | 0.0031 |
| RF00017.14       | 7.29 | 2.14E-04 | 0.0031 |
| RF00017.21       | 7.29 | 2.14E-04 | 0.0031 |
| RF00017.22       | 7.29 | 2.14E-04 | 0.0031 |
| RN7SL471P        | 7.29 | 2.14E-04 | 0.0031 |
| ENST000000004420 | 7.28 | 2.11E-04 | 0.0030 |
| ENST000001776483 | 7.27 | 5.56E-05 | 0.0017 |
| CBS              | 7.25 | 1.25E-04 | 0.0025 |
| CDC45            | 7.23 | 7.72E-06 | 0.0010 |
| ENST000002965950 | 7.22 | 5.81E-03 | 0.0186 |
| GJB2             | 7.21 | 2.28E-04 | 0.0032 |
| ENST00000409111  | 7.17 | 2.78E-05 | 0.0014 |
| LINC02341        | 7.17 | 7.05E-07 | 0.0008 |
| ENST000003405560 | 7.16 | 8.01E-05 | 0.0020 |
| IQGAP3           | 7.15 | 5.49E-05 | 0.0017 |
| HMMR             | 7.15 | 1.98E-06 | 0.0008 |
| SCD              | 7.13 | 8.68E-05 | 0.0021 |
| IFNG             | 7.13 | 1.95E-06 | 0.0008 |
| LPL              | 7.11 | 1.37E-04 | 0.0026 |

|                  |      |          |        |
|------------------|------|----------|--------|
| HIST3H2BA        | 7.10 | 2.60E-04 | 0.0033 |
| ENST000003109550 | 7.07 | 2.29E-06 | 0.0008 |
| EME1             | 7.06 | 1.22E-05 | 0.0010 |
| BATF3            | 7.03 | 3.63E-05 | 0.0015 |
| ENST000002503830 | 7.02 | 2.99E-05 | 0.0014 |
| ENST000002275033 | 6.98 | 1.80E-04 | 0.0028 |
| UBE2C            | 6.96 | 4.89E-05 | 0.0017 |
| ENST000003083170 | 6.95 | 7.46E-05 | 0.0020 |
| AC010655.4       | 6.92 | 4.51E-05 | 0.0016 |
| ENST000003004030 | 6.92 | 1.37E-06 | 0.0008 |
| ENST000002613770 | 6.91 | 1.99E-03 | 0.0095 |
| PBK              | 6.90 | 6.43E-06 | 0.0010 |
| DLGAP5           | 6.85 | 5.45E-05 | 0.0017 |
| ENST000003289281 | 6.84 | 8.99E-05 | 0.0022 |
| MYOF             | 6.83 | 1.12E-05 | 0.0010 |
| ENST000003514500 | 6.78 | 1.62E-02 | 0.0377 |
| ENST000002587810 | 6.76 | 9.13E-03 | 0.0252 |
| IL21-AS1         | 6.75 | 1.84E-05 | 0.0011 |
| ENST000002463140 | 6.74 | 8.79E-05 | 0.0021 |
| ENST000002292650 | 6.70 | 5.24E-05 | 0.0017 |
| KIF2C            | 6.69 | 3.14E-06 | 0.0009 |
| ENST000002803523 | 6.67 | 9.17E-05 | 0.0022 |
| ENST000003611620 | 6.64 | 1.47E-02 | 0.0352 |
| CEP55            | 6.62 | 7.78E-06 | 0.0010 |
| ENST000002939681 | 6.60 | 2.88E-04 | 0.0035 |
| CYP1B1           | 6.57 | 2.14E-05 | 0.0012 |
| ENST000003045933 | 6.54 | 6.67E-05 | 0.0019 |
| IL1R2            | 6.51 | 5.43E-05 | 0.0017 |
| ENST000002284250 | 6.49 | 1.63E-04 | 0.0027 |
| ENST000002052140 | 6.48 | 8.68E-04 | 0.0060 |
| AC093512.2       | 6.47 | 7.00E-03 | 0.0211 |
| DHFRP1           | 6.45 | 3.60E-03 | 0.0136 |
| SPR              | 6.42 | 7.51E-04 | 0.0055 |
| ENST000003203891 | 6.41 | 2.43E-04 | 0.0032 |
| ZBTB32           | 6.40 | 1.51E-05 | 0.0011 |
| MCM10            | 6.40 | 3.92E-05 | 0.0016 |
| ENST000003401161 | 6.38 | 8.28E-05 | 0.0021 |
| CALD1            | 6.37 | 1.56E-04 | 0.0027 |
| ENST000003544640 | 6.37 | 1.96E-03 | 0.0094 |
| PKMYT1           | 6.37 | 5.59E-05 | 0.0017 |
| CDCA2            | 6.36 | 8.26E-07 | 0.0008 |
| MAOA             | 6.36 | 6.99E-05 | 0.0019 |
| CCNA2            | 6.33 | 9.28E-06 | 0.0010 |
| GALNT18          | 6.32 | 5.49E-04 | 0.0047 |
| HIST2H3A         | 6.32 | 2.28E-06 | 0.0008 |
| HIST2H3C         | 6.32 | 2.28E-06 | 0.0008 |
| ENST000003242290 | 6.31 | 9.63E-05 | 0.0022 |

|                  |      |          |        |
|------------------|------|----------|--------|
| SEMA7A           | 6.30 | 8.25E-07 | 0.0008 |
| CDC25A           | 6.28 | 1.48E-05 | 0.0011 |
| DSCC1            | 6.28 | 2.38E-06 | 0.0008 |
| AP000424.1       | 6.28 | 4.37E-04 | 0.0042 |
| ENST00000090411  | 6.27 | 1.25E-02 | 0.0314 |
| CDCA5            | 6.27 | 1.43E-04 | 0.0026 |
| HIST1H3G         | 6.26 | 4.59E-05 | 0.0016 |
| FAM72B           | 6.25 | 2.06E-06 | 0.0008 |
| POC1B-GALNT4     | 6.25 | 3.23E-03 | 0.0127 |
| PYCR1            | 6.20 | 1.15E-04 | 0.0024 |
| ENST000002920671 | 6.19 | 8.58E-03 | 0.0241 |
| NAPSA            | 6.19 | 5.05E-05 | 0.0017 |
| CCNB1            | 6.18 | 3.07E-05 | 0.0014 |
| MIR155HG         | 6.18 | 1.69E-06 | 0.0008 |
| CDK1             | 6.17 | 4.93E-06 | 0.0009 |
| ENST000002584943 | 6.17 | 3.14E-03 | 0.0125 |
| CHAC1            | 6.17 | 1.74E-05 | 0.0011 |
| AL357992.1       | 6.16 | 1.85E-03 | 0.0091 |
| ENST000003294202 | 6.16 | 1.22E-04 | 0.0025 |
| ENST000002842591 | 6.15 | 5.65E-04 | 0.0048 |
| AURKA            | 6.14 | 5.78E-07 | 0.0008 |
| ENST000003380420 | 6.14 | 4.68E-03 | 0.0162 |
| ENST000002875980 | 6.13 | 4.59E-06 | 0.0009 |
| RRM2             | 6.13 | 3.85E-06 | 0.0009 |
| HILPDA           | 6.12 | 6.74E-06 | 0.0010 |
| ENST000002304800 | 6.12 | 1.26E-04 | 0.0025 |
| ITPKA            | 6.11 | 1.98E-04 | 0.0030 |
| FABP5P7          | 6.11 | 4.37E-06 | 0.0009 |
| IL17A            | 6.09 | 7.41E-04 | 0.0055 |
| EXO1             | 6.08 | 1.28E-06 | 0.0008 |
| DTL              | 6.07 | 5.74E-07 | 0.0008 |
| UHRF1            | 6.07 | 1.82E-05 | 0.0011 |
| ENST000003891460 | 6.06 | 3.30E-04 | 0.0037 |
| CDC6             | 6.05 | 4.86E-07 | 0.0008 |
| ENST000003051882 | 6.04 | 1.71E-05 | 0.0011 |
| GAD1             | 6.04 | 4.36E-04 | 0.0042 |
| ENST000002218560 | 6.02 | 1.79E-04 | 0.0028 |
| CAPSL            | 6.01 | 1.51E-04 | 0.0026 |
| TMPRSS6          | 6.01 | 7.42E-04 | 0.0055 |
| FAM72A           | 6.00 | 4.84E-06 | 0.0009 |
| TEDC2            | 6.00 | 6.52E-05 | 0.0019 |
| MELK             | 5.98 | 1.42E-06 | 0.0008 |
| AL034430.1       | 5.98 | 2.80E-03 | 0.0116 |
| STRIP2           | 5.97 | 4.09E-06 | 0.0009 |
| TTK              | 5.96 | 2.47E-06 | 0.0008 |
| ENST000003484330 | 5.95 | 8.86E-04 | 0.0060 |
| ENST000003285960 | 5.94 | 3.39E-03 | 0.0131 |

|                  |      |          |        |
|------------------|------|----------|--------|
| TK1              | 5.93 | 2.77E-04 | 0.0034 |
| AC068547.1       | 5.92 | 3.12E-05 | 0.0014 |
| HPDL             | 5.90 | 9.79E-05 | 0.0022 |
| HIST1H3C         | 5.89 | 4.46E-05 | 0.0016 |
| DOK5             | 5.89 | 1.94E-04 | 0.0030 |
| NDFIP2           | 5.88 | 6.54E-07 | 0.0008 |
| DEPDC1           | 5.88 | 3.49E-06 | 0.0009 |
| ENST000003253851 | 5.87 | 2.38E-03 | 0.0106 |
| CSF2             | 5.86 | 9.22E-04 | 0.0062 |
| ANLN             | 5.86 | 1.08E-06 | 0.0008 |
| TOP2A            | 5.85 | 6.88E-07 | 0.0008 |
| TEAD4            | 5.85 | 2.69E-04 | 0.0034 |
| NCAPG            | 5.85 | 6.81E-06 | 0.0010 |
| VDR              | 5.85 | 9.36E-05 | 0.0022 |
| PTGFRN           | 5.84 | 1.45E-05 | 0.0011 |
| MT3              | 5.82 | 7.56E-04 | 0.0055 |
| MND1             | 5.81 | 1.96E-05 | 0.0012 |
| ENST000003500260 | 5.81 | 2.52E-04 | 0.0033 |
| MYO1B            | 5.80 | 7.89E-04 | 0.0056 |
| KIF15            | 5.80 | 3.79E-05 | 0.0015 |
| ENST000002197820 | 5.78 | 2.36E-04 | 0.0032 |
| KIFC1            | 5.74 | 4.75E-06 | 0.0009 |
| RAD54L           | 5.74 | 5.01E-06 | 0.0009 |
| IFNB1            | 5.74 | 3.46E-04 | 0.0038 |
| LTA              | 5.73 | 5.31E-06 | 0.0009 |
| ENST000002436620 | 5.72 | 4.17E-04 | 0.0041 |
| AK4              | 5.71 | 9.07E-06 | 0.0010 |
| CD68             | 5.71 | 1.09E-03 | 0.0067 |
| ENST000002721980 | 5.70 | 6.52E-04 | 0.0051 |
| ANK2             | 5.70 | 3.69E-05 | 0.0015 |
| ENST000002623153 | 5.70 | 4.30E-03 | 0.0153 |
| UBE2T            | 5.68 | 9.65E-06 | 0.0010 |
| ENST000003617450 | 5.67 | 3.87E-04 | 0.0040 |
| ENST000002908811 | 5.67 | 4.03E-04 | 0.0040 |
| CCL17            | 5.66 | 3.10E-04 | 0.0036 |
| ENST000003222690 | 5.65 | 3.03E-04 | 0.0036 |
| ENST000002633600 | 5.64 | 4.34E-05 | 0.0016 |
| GOS2             | 5.63 | 2.15E-05 | 0.0012 |
| DNAJC12          | 5.63 | 3.07E-05 | 0.0014 |
| ENST000003228861 | 5.61 | 5.98E-03 | 0.0190 |
| GCSHP5           | 5.61 | 2.00E-03 | 0.0095 |
| HIST1H3B         | 5.61 | 2.93E-05 | 0.0014 |
| CENPA            | 5.60 | 4.06E-05 | 0.0016 |
| BIRC5            | 5.60 | 1.45E-04 | 0.0026 |
| ENST000003062563 | 5.59 | 3.19E-04 | 0.0037 |
| ENST000003195182 | 5.59 | 3.02E-04 | 0.0036 |
| ZNF823           | 5.58 | 7.51E-04 | 0.0055 |

|                  |      |          |        |
|------------------|------|----------|--------|
| SLC6A9           | 5.58 | 5.46E-04 | 0.0046 |
| LHFPL6           | 5.57 | 2.32E-03 | 0.0104 |
| IER3             | 5.57 | 9.76E-06 | 0.0010 |
| MYBL2            | 5.56 | 2.77E-05 | 0.0014 |
| CTTN             | 5.55 | 5.03E-04 | 0.0045 |
| DHCR24           | 5.55 | 5.80E-04 | 0.0048 |
| ENST000002938722 | 5.54 | 6.92E-04 | 0.0053 |
| ENST000002500562 | 5.54 | 7.24E-04 | 0.0054 |
| CDKN3            | 5.54 | 5.61E-05 | 0.0017 |
| SLCO4A1          | 5.54 | 7.05E-05 | 0.0019 |
| C17orf58         | 5.53 | 2.47E-04 | 0.0032 |
| HASPIN           | 5.53 | 7.37E-04 | 0.0055 |
| CCNB2            | 5.53 | 3.59E-06 | 0.0009 |
| AC112721.1       | 5.52 | 1.47E-03 | 0.0080 |
| ENST000003386310 | 5.52 | 5.64E-03 | 0.0183 |
| ENST00000629913  | 5.51 | 3.95E-04 | 0.0040 |
| IL4I1            | 5.51 | 8.74E-06 | 0.0010 |
| CDCA8            | 5.51 | 6.92E-06 | 0.0010 |
| MKI67            | 5.50 | 6.91E-06 | 0.0010 |
| ENST000003024500 | 5.50 | 2.99E-06 | 0.0009 |
| TRIP13           | 5.50 | 1.93E-04 | 0.0030 |
| ENST000002988380 | 5.50 | 3.59E-04 | 0.0038 |
| ENST000002590431 | 5.50 | 2.01E-04 | 0.0030 |
| ENST000003183642 | 5.48 | 4.88E-04 | 0.0044 |
| PSRC1            | 5.47 | 8.81E-06 | 0.0010 |
| HIST1H3F         | 5.47 | 1.98E-06 | 0.0008 |
| ARG2             | 5.46 | 2.07E-05 | 0.0012 |
| POLQ             | 5.46 | 1.32E-05 | 0.0010 |
| RIBC2            | 5.45 | 4.09E-05 | 0.0016 |
| KIF23            | 5.45 | 7.34E-06 | 0.0010 |
| AURKB            | 5.45 | 2.48E-06 | 0.0008 |
| ASS1             | 5.43 | 2.44E-04 | 0.0032 |
| ENST000003378811 | 5.42 | 3.87E-04 | 0.0040 |
| HIST1H4I         | 5.42 | 2.12E-06 | 0.0008 |
| KIF4A            | 5.42 | 8.75E-05 | 0.0021 |
| ENST000003158774 | 5.42 | 4.13E-04 | 0.0041 |
| RHEBL1           | 5.42 | 9.57E-03 | 0.0260 |
| AIM2             | 5.41 | 3.24E-06 | 0.0009 |
| CKAP2L           | 5.41 | 4.30E-05 | 0.0016 |
| PSMC1P1          | 5.41 | 1.94E-03 | 0.0094 |
| ENST000002915351 | 5.41 | 5.35E-04 | 0.0046 |
| ENST000002594602 | 5.40 | 1.05E-02 | 0.0276 |
| HJURP            | 5.40 | 2.76E-06 | 0.0008 |
| FNDC9            | 5.39 | 4.02E-04 | 0.0040 |
| ENST000003285141 | 5.39 | 2.73E-03 | 0.0115 |
| DHRS9            | 5.39 | 2.41E-03 | 0.0107 |
| INSM1            | 5.38 | 4.29E-04 | 0.0041 |

|                  |      |          |        |
|------------------|------|----------|--------|
| SLC25A10         | 5.36 | 6.07E-03 | 0.0192 |
| KIF14            | 5.36 | 3.03E-05 | 0.0014 |
| AC009005.1       | 5.36 | 4.22E-04 | 0.0041 |
| NEK2             | 5.36 | 1.30E-06 | 0.0008 |
| KIF24            | 5.35 | 2.09E-05 | 0.0012 |
| HIST1H2AL        | 5.35 | 2.10E-05 | 0.0012 |
| ASPM             | 5.34 | 3.68E-05 | 0.0015 |
| ERCC6L           | 5.33 | 1.82E-06 | 0.0008 |
| ENST000002500920 | 5.32 | 7.07E-06 | 0.0010 |
| XIRP1            | 5.31 | 8.01E-04 | 0.0057 |
| SLC29A1          | 5.31 | 3.99E-05 | 0.0016 |
| ENST000002636461 | 5.30 | 5.16E-04 | 0.0045 |
| PPFIA4           | 5.30 | 2.49E-05 | 0.0013 |
| GINS2            | 5.30 | 1.90E-04 | 0.0029 |
| ZNF697           | 5.30 | 1.45E-03 | 0.0080 |
| ENST000003512880 | 5.30 | 1.61E-02 | 0.0375 |
| RAD51            | 5.29 | 2.70E-06 | 0.0008 |
| ENST000003265871 | 5.28 | 1.07E-02 | 0.0281 |
| ASF1B            | 5.28 | 2.17E-05 | 0.0012 |
| ENST000002756351 | 5.27 | 6.39E-04 | 0.0051 |
| MFSD2A           | 5.27 | 2.01E-04 | 0.0030 |
| CFAP58           | 5.27 | 1.39E-03 | 0.0078 |
| ENST000002793871 | 5.26 | 1.79E-02 | 0.0406 |
| ENST000003027590 | 5.26 | 5.53E-05 | 0.0017 |
| SKA3             | 5.24 | 3.96E-06 | 0.0009 |
| ENST000003132852 | 5.23 | 1.97E-06 | 0.0008 |
| PCDH12           | 5.23 | 3.49E-05 | 0.0015 |
| AL133215.2       | 5.23 | 5.34E-04 | 0.0046 |
| SLC27A2          | 5.22 | 9.00E-06 | 0.0010 |
| PFKFB4           | 5.22 | 4.71E-05 | 0.0016 |
| ENST000002459341 | 5.22 | 7.89E-06 | 0.0010 |
| ENST000002490660 | 5.22 | 5.57E-04 | 0.0047 |
| AC112777.1       | 5.19 | 1.70E-03 | 0.0087 |
| SLC43A3          | 5.18 | 1.62E-06 | 0.0008 |
| IL5              | 5.18 | 7.14E-03 | 0.0213 |
| ENST000003196220 | 5.17 | 6.14E-04 | 0.0050 |
| EPAS1            | 5.17 | 9.06E-06 | 0.0010 |
| ENST000002650561 | 5.16 | 2.06E-06 | 0.0008 |
| ATF3             | 5.15 | 6.71E-04 | 0.0052 |
| KIF18B           | 5.14 | 2.07E-03 | 0.0097 |
| CCDC74B          | 5.14 | 7.64E-04 | 0.0056 |
| DIAPH3           | 5.14 | 2.34E-06 | 0.0008 |
| ENST000001894440 | 5.13 | 1.30E-05 | 0.0010 |
| BRCA1            | 5.12 | 1.16E-06 | 0.0008 |
| ENST000003112751 | 5.12 | 9.12E-03 | 0.0252 |
| CDC25C           | 5.12 | 5.26E-06 | 0.0009 |
| AC007283.1       | 5.12 | 1.25E-03 | 0.0073 |

|                  |      |          |        |
|------------------|------|----------|--------|
| AIF1L            | 5.11 | 7.20E-04 | 0.0054 |
| ENST000002632680 | 5.10 | 1.03E-03 | 0.0066 |
| AUNIP            | 5.10 | 1.78E-04 | 0.0028 |
| ENST000002045170 | 5.09 | 2.02E-02 | 0.0442 |
| PSAT1            | 5.09 | 1.51E-06 | 0.0008 |
| ENST000003442790 | 5.09 | 7.08E-04 | 0.0054 |
| VEGFA            | 5.09 | 8.77E-06 | 0.0010 |
| CKS2             | 5.09 | 7.40E-06 | 0.0010 |
| LAMB3            | 5.08 | 1.26E-03 | 0.0073 |
| MCM2             | 5.08 | 2.65E-06 | 0.0008 |
| ENST000003048341 | 5.08 | 6.88E-04 | 0.0053 |
| AK4P1            | 5.07 | 9.27E-03 | 0.0254 |
| DEPDC1B          | 5.07 | 2.34E-06 | 0.0008 |
| PAQR4            | 5.07 | 4.23E-03 | 0.0152 |
| ENST000002850391 | 5.05 | 1.56E-03 | 0.0083 |
| ENST000002541930 | 5.05 | 4.12E-05 | 0.0016 |
| ENST000002603590 | 5.05 | 1.05E-05 | 0.0010 |
| ENST000003568360 | 5.05 | 7.35E-04 | 0.0055 |
| DDIAS            | 5.04 | 9.83E-06 | 0.0010 |
| ADM              | 5.04 | 5.56E-04 | 0.0047 |
| SDC4             | 5.04 | 1.35E-05 | 0.0011 |
| NAMPTP1          | 5.04 | 1.95E-03 | 0.0094 |
| TYMS             | 5.03 | 4.95E-06 | 0.0009 |
| IGSF3            | 5.03 | 3.78E-04 | 0.0039 |
| PTMS             | 5.03 | 2.15E-04 | 0.0031 |
| RAD51AP1         | 5.03 | 2.36E-06 | 0.0008 |
| ENST000002790361 | 5.03 | 1.25E-02 | 0.0313 |
| CENPW            | 5.03 | 1.35E-04 | 0.0025 |
| POC1A            | 5.02 | 1.46E-05 | 0.0011 |
| CLSPN            | 5.01 | 8.49E-06 | 0.0010 |
| HIST1H2AJ        | 5.00 | 5.98E-05 | 0.0018 |
| KCNK5            | 4.98 | 4.09E-06 | 0.0009 |
| HIST1H2BJ        | 4.98 | 1.96E-05 | 0.0012 |
| NUF2             | 4.98 | 1.12E-06 | 0.0008 |
| ENST000002699320 | 4.97 | 5.58E-03 | 0.0181 |
| MPZL2            | 4.97 | 7.54E-06 | 0.0010 |
| HSD11B1          | 4.96 | 4.64E-05 | 0.0016 |
| HIST1H2AI        | 4.96 | 1.17E-05 | 0.0010 |
| PKN3             | 4.96 | 2.03E-03 | 0.0096 |
| IGF2             | 4.95 | 8.80E-04 | 0.0060 |
| ATP5MF-PTCD1     | 4.94 | 8.24E-04 | 0.0058 |
| AP001453.2       | 4.94 | 8.84E-04 | 0.0060 |
| EBI3             | 4.93 | 1.06E-03 | 0.0066 |
| ENST000003411540 | 4.93 | 5.50E-03 | 0.0179 |
| ECSCR            | 4.93 | 2.74E-03 | 0.0115 |
| UBD              | 4.92 | 8.77E-04 | 0.0060 |
| UNQ6494          | 4.92 | 3.13E-03 | 0.0125 |



|                  |      |          |        |
|------------------|------|----------|--------|
| E2F1             | 4.92 | 2.27E-06 | 0.0008 |
| ENST000003556360 | 4.91 | 1.20E-03 | 0.0071 |
| ENST000003588670 | 4.91 | 2.68E-03 | 0.0114 |
| CXCL9            | 4.90 | 1.04E-04 | 0.0023 |
| AC007207.1       | 4.90 | 9.25E-04 | 0.0062 |
| ENST000002621245 | 4.90 | 2.91E-04 | 0.0035 |
| SGO1             | 4.90 | 1.45E-05 | 0.0011 |
| SLC7A11          | 4.89 | 3.58E-06 | 0.0009 |
| ENST000002503792 | 4.88 | 1.07E-02 | 0.0280 |
| P4HA2            | 4.88 | 1.27E-04 | 0.0025 |
| CENPS-CORT       | 4.88 | 4.87E-03 | 0.0166 |
| IRF4             | 4.87 | 8.87E-07 | 0.0008 |
| PDXP             | 4.86 | 7.81E-04 | 0.0056 |
| ENST000002880871 | 4.86 | 1.17E-03 | 0.0070 |
| IFIT2            | 4.85 | 4.83E-06 | 0.0009 |
| ORC1             | 4.85 | 2.73E-06 | 0.0008 |
| SLC1A5           | 4.84 | 4.34E-06 | 0.0009 |
| ENST000003023620 | 4.83 | 5.37E-05 | 0.0017 |
| NUSAP1           | 4.82 | 3.99E-05 | 0.0016 |
| IL22             | 4.82 | 1.28E-03 | 0.0074 |
| B3GNT5           | 4.82 | 4.15E-04 | 0.0041 |
| ENST000003332560 | 4.81 | 2.38E-02 | 0.0498 |
| ATP2A1           | 4.81 | 1.25E-03 | 0.0073 |
| NRM              | 4.81 | 7.75E-03 | 0.0226 |
| SPAG5            | 4.78 | 1.51E-06 | 0.0008 |
| LRP2             | 4.77 | 3.69E-04 | 0.0039 |
| ESPL1            | 4.77 | 2.56E-05 | 0.0013 |
| KRT7             | 4.77 | 1.37E-03 | 0.0077 |
| HIST2H4A         | 4.76 | 1.05E-06 | 0.0008 |
| HIST1H3J         | 4.76 | 1.58E-05 | 0.0011 |
| S100A2           | 4.74 | 1.07E-03 | 0.0067 |
| RNU5A-8P         | 4.73 | 7.83E-03 | 0.0227 |
| KDELR3           | 4.72 | 2.83E-03 | 0.0117 |
| PHGDH            | 4.72 | 1.76E-05 | 0.0011 |
| ALDH1L2          | 4.72 | 1.78E-03 | 0.0090 |
| RMI2             | 4.71 | 1.39E-04 | 0.0026 |
| ENST000002747471 | 4.71 | 1.29E-03 | 0.0074 |
| TNFRSF12A        | 4.71 | 8.64E-04 | 0.0059 |
| FAM71B           | 4.70 | 2.75E-04 | 0.0034 |
| ARHGAP11A        | 4.70 | 1.61E-06 | 0.0008 |
| ENST000002335052 | 4.70 | 1.29E-03 | 0.0074 |
| ENST000002572610 | 4.69 | 9.77E-03 | 0.0263 |
| CD200            | 4.69 | 3.87E-04 | 0.0040 |
| ENST000002611921 | 4.69 | 8.38E-05 | 0.0021 |
| ENST000003176150 | 4.69 | 3.40E-03 | 0.0131 |
| SHCBP1           | 4.68 | 1.22E-05 | 0.0010 |
| AC112721.2       | 4.68 | 2.57E-05 | 0.0013 |

|                  |      |          |        |
|------------------|------|----------|--------|
| WARS             | 4.66 | 1.02E-05 | 0.0010 |
| ENST000002161902 | 4.66 | 2.15E-03 | 0.0099 |
| HIST1H1B         | 4.65 | 1.47E-06 | 0.0008 |
| KIF11            | 4.65 | 4.58E-06 | 0.0009 |
| CKS1B            | 4.65 | 1.07E-05 | 0.0010 |
| PRG4             | 4.65 | 6.77E-04 | 0.0052 |
| ENST000002972580 | 4.64 | 2.22E-05 | 0.0012 |
| ZWINT            | 4.63 | 4.34E-05 | 0.0016 |
| CIT              | 4.63 | 3.75E-06 | 0.0009 |
| MKX              | 4.62 | 1.50E-03 | 0.0081 |
| HIST1H2BL        | 4.61 | 2.59E-06 | 0.0008 |
| CENPF            | 4.61 | 1.26E-05 | 0.0010 |
| FBXO43           | 4.61 | 3.19E-04 | 0.0037 |
| OIP5             | 4.60 | 1.13E-05 | 0.0010 |
| CDC20            | 4.59 | 7.93E-04 | 0.0057 |
| OSCP1            | 4.59 | 1.08E-02 | 0.0283 |
| ENST000002373051 | 4.58 | 2.02E-02 | 0.0442 |
| HIST1H2AH        | 4.58 | 3.66E-05 | 0.0015 |
| EIF4EBP1         | 4.57 | 1.16E-05 | 0.0010 |
| NUDT8            | 4.57 | 4.49E-04 | 0.0042 |
| HIST1H2BM        | 4.57 | 7.35E-06 | 0.0010 |
| ENST000003218980 | 4.57 | 7.46E-03 | 0.0220 |
| CDCA3            | 4.56 | 7.85E-06 | 0.0010 |
| TNF              | 4.56 | 5.26E-05 | 0.0017 |
| SH3D21           | 4.54 | 1.04E-05 | 0.0010 |
| ZNF334           | 4.53 | 1.88E-03 | 0.0092 |
| ENST000002605990 | 4.52 | 1.48E-02 | 0.0353 |
| C17orf53         | 4.52 | 6.35E-05 | 0.0019 |
| PSMC3IP          | 4.52 | 4.34E-05 | 0.0016 |
| C6orf223         | 4.51 | 5.44E-03 | 0.0178 |
| RECQL4           | 4.51 | 1.63E-04 | 0.0027 |
| AC005324.4       | 4.51 | 1.79E-03 | 0.0090 |
| AL021578.1       | 4.51 | 1.79E-03 | 0.0090 |
| SGO2             | 4.51 | 1.81E-05 | 0.0011 |
| ANGPTL6          | 4.50 | 2.25E-05 | 0.0012 |
| DYRK3            | 4.50 | 1.90E-05 | 0.0011 |
| EMP1             | 4.50 | 1.47E-04 | 0.0026 |
| MCM4             | 4.47 | 4.77E-06 | 0.0009 |
| CENPU            | 4.47 | 2.43E-06 | 0.0008 |
| IL26             | 4.47 | 2.37E-03 | 0.0106 |
| E2F8             | 4.46 | 8.81E-06 | 0.0010 |
| ENST000002186521 | 4.45 | 9.86E-06 | 0.0010 |
| IL1R1            | 4.44 | 6.75E-04 | 0.0052 |
| ENST000003509971 | 4.44 | 7.72E-04 | 0.0056 |
| HIST2H2AA3       | 4.43 | 1.56E-05 | 0.0011 |
| AC004069.1       | 4.43 | 1.72E-03 | 0.0088 |
| SAPCD2           | 4.42 | 6.99E-04 | 0.0053 |

|                  |      |          |        |
|------------------|------|----------|--------|
| TNFRSF18         | 4.39 | 6.16E-06 | 0.0010 |
| AP000781.2       | 4.39 | 4.25E-05 | 0.0016 |
| DPCD             | 4.38 | 7.38E-05 | 0.0020 |
| COL6A3           | 4.38 | 4.47E-06 | 0.0009 |
| MYH10            | 4.38 | 1.47E-04 | 0.0026 |
| TRIB3            | 4.38 | 3.72E-04 | 0.0039 |
| CHEK1            | 4.38 | 1.78E-06 | 0.0008 |
| ZACN             | 4.37 | 5.62E-03 | 0.0182 |
| NAMPT            | 4.36 | 2.00E-05 | 0.0012 |
| SMC1B            | 4.36 | 1.01E-04 | 0.0022 |
| AP003472.2       | 4.36 | 3.51E-03 | 0.0134 |
| GK               | 4.36 | 4.65E-06 | 0.0009 |
| ENST000003107751 | 4.35 | 2.04E-05 | 0.0012 |
| CENPE            | 4.34 | 3.99E-06 | 0.0009 |
| HIST2H3D         | 4.34 | 5.06E-06 | 0.0009 |
| KNL1             | 4.33 | 2.26E-06 | 0.0008 |
| BAG6-427         | 4.33 | 5.24E-03 | 0.0174 |
| MAK              | 4.33 | 3.85E-04 | 0.0039 |
| H2AFX            | 4.32 | 3.71E-05 | 0.0015 |
| CLIC4            | 4.32 | 2.61E-04 | 0.0033 |
| ENST000002656020 | 4.31 | 4.75E-03 | 0.0163 |
| HIST2H2AA4       | 4.31 | 4.40E-05 | 0.0016 |
| UCK2             | 4.30 | 2.07E-05 | 0.0012 |
| LINC00158        | 4.30 | 1.40E-04 | 0.0026 |
| ENST000002994980 | 4.29 | 3.11E-03 | 0.0124 |
| IL23R            | 4.29 | 2.29E-04 | 0.0032 |
| TUBA1B           | 4.29 | 4.30E-05 | 0.0016 |
| IFIT3            | 4.28 | 3.46E-06 | 0.0009 |
| FLT1             | 4.28 | 1.08E-05 | 0.0010 |
| SORD             | 4.28 | 1.47E-02 | 0.0352 |
| ENST000003045141 | 4.28 | 2.24E-02 | 0.0477 |
| NCAPH            | 4.28 | 8.43E-06 | 0.0010 |
| SKA1             | 4.28 | 8.07E-06 | 0.0010 |
| PGAM1            | 4.27 | 8.00E-06 | 0.0010 |
| KIF18A           | 4.27 | 5.07E-06 | 0.0009 |
| POLE2            | 4.27 | 1.11E-05 | 0.0010 |
| ENST000002114020 | 4.26 | 1.06E-03 | 0.0066 |
| BUB1B            | 4.26 | 1.51E-05 | 0.0011 |
| HIST1H2BO        | 4.26 | 4.98E-06 | 0.0009 |
| HOPX             | 4.25 | 2.24E-05 | 0.0012 |
| TNFRSF9          | 4.25 | 2.87E-06 | 0.0009 |
| TMPRSS3          | 4.25 | 1.83E-03 | 0.0091 |
| SPC25            | 4.24 | 1.03E-05 | 0.0010 |
| CENPI            | 4.24 | 1.89E-05 | 0.0011 |
| ENST00000567345  | 4.24 | 3.69E-05 | 0.0015 |
| AC017002.3       | 4.24 | 4.94E-04 | 0.0044 |
| PCNA             | 4.24 | 1.22E-05 | 0.0010 |

|                  |      |          |        |
|------------------|------|----------|--------|
| WDHD1            | 4.24 | 2.28E-06 | 0.0008 |
| LINC01943        | 4.24 | 7.80E-04 | 0.0056 |
| FAM57A           | 4.23 | 3.02E-03 | 0.0122 |
| TWIST1           | 4.22 | 2.32E-02 | 0.0488 |
| IL12RB2          | 4.22 | 7.99E-06 | 0.0010 |
| MTHFD2           | 4.21 | 4.25E-06 | 0.0009 |
| NME1-NME2        | 4.21 | 6.34E-05 | 0.0019 |
| ENST000003408481 | 4.21 | 2.38E-04 | 0.0032 |
| APOBEC3B         | 4.20 | 7.74E-03 | 0.0226 |
| TROAP            | 4.20 | 7.97E-05 | 0.0020 |
| PTTG1            | 4.20 | 1.50E-05 | 0.0011 |
| AC096920.1       | 4.20 | 5.17E-03 | 0.0172 |
| ENST000002155871 | 4.20 | 1.25E-05 | 0.0010 |
| CAMK1            | 4.20 | 1.98E-05 | 0.0012 |
| STMN1            | 4.19 | 2.34E-05 | 0.0012 |
| DBN1             | 4.19 | 4.05E-05 | 0.0016 |
| ENST000003183880 | 4.19 | 2.63E-03 | 0.0113 |
| SDCBP2           | 4.18 | 2.42E-04 | 0.0032 |
| EGR1             | 4.18 | 1.24E-03 | 0.0073 |
| RBBP8            | 4.17 | 8.08E-06 | 0.0010 |
| HIP1             | 4.17 | 1.17E-02 | 0.0299 |
| WDR34            | 4.17 | 8.19E-04 | 0.0058 |
| RGS16            | 4.17 | 6.92E-05 | 0.0019 |
| NCAPG2           | 4.15 | 9.53E-06 | 0.0010 |
| DMC1             | 4.15 | 3.49E-04 | 0.0038 |
| AC126696.3       | 4.13 | 2.71E-03 | 0.0114 |
| THBS4            | 4.13 | 7.09E-04 | 0.0054 |
| AC008147.4       | 4.12 | 2.98E-03 | 0.0121 |
| HIST1H2BH        | 4.11 | 1.40E-05 | 0.0011 |
| PTPRF            | 4.11 | 1.48E-02 | 0.0354 |
| BATF             | 4.10 | 4.31E-05 | 0.0016 |
| ENST000003616110 | 4.10 | 2.97E-05 | 0.0014 |
| SMTN             | 4.09 | 3.43E-04 | 0.0038 |
| DUSP6            | 4.09 | 3.24E-04 | 0.0037 |
| TUBB             | 4.08 | 7.78E-06 | 0.0010 |
| B4GALNT1         | 4.08 | 4.59E-03 | 0.0159 |
| GOLM1            | 4.08 | 7.58E-04 | 0.0055 |
| BYSL             | 4.07 | 8.45E-06 | 0.0010 |
| TNFRSF4          | 4.07 | 4.06E-05 | 0.0016 |
| AC009159.2       | 4.07 | 4.47E-03 | 0.0156 |
| ENST000003243662 | 4.06 | 7.08E-04 | 0.0054 |
| IL2RA            | 4.05 | 3.84E-06 | 0.0009 |
| NPM3             | 4.05 | 3.94E-06 | 0.0009 |
| AC073896.1       | 4.03 | 2.08E-02 | 0.0452 |
| AC012073.1       | 4.03 | 6.27E-03 | 0.0195 |
| ENST000003569480 | 4.03 | 1.81E-04 | 0.0029 |
| SNORA21B         | 4.02 | 2.22E-02 | 0.0473 |

|                  |      |          |        |
|------------------|------|----------|--------|
| CYP27B1          | 4.02 | 3.63E-05 | 0.0015 |
| MTFR2            | 4.01 | 4.53E-05 | 0.0016 |
| DNAJB5           | 4.01 | 2.46E-05 | 0.0013 |
| GPR84            | 4.01 | 3.28E-03 | 0.0128 |
| NMRAL2P          | 4.01 | 4.01E-03 | 0.0146 |
| LINC01281        | 4.00 | 1.00E-05 | 0.0010 |
| HIST1H4L         | 3.99 | 3.96E-04 | 0.0040 |
| TUBA1C           | 3.99 | 5.78E-05 | 0.0018 |
| AC007240.1       | 3.99 | 9.69E-06 | 0.0010 |
| KNSTRN           | 3.98 | 8.66E-06 | 0.0010 |
| EGR3             | 3.98 | 6.00E-04 | 0.0049 |
| SNORA74D         | 3.98 | 2.95E-05 | 0.0014 |
| IGFBP6           | 3.97 | 2.58E-03 | 0.0111 |
| ENST000003262323 | 3.97 | 7.08E-04 | 0.0054 |
| LINC01229        | 3.96 | 1.72E-02 | 0.0394 |
| TAGLN3           | 3.95 | 3.66E-03 | 0.0138 |
| NAB2             | 3.95 | 1.57E-05 | 0.0011 |
| MTHFD1L          | 3.94 | 5.13E-04 | 0.0045 |
| CENPH            | 3.94 | 5.53E-06 | 0.0009 |
| FKBPL            | 3.94 | 1.80E-04 | 0.0029 |
| ENST000002388232 | 3.93 | 3.87E-05 | 0.0016 |
| HK2              | 3.93 | 1.11E-05 | 0.0010 |
| PARD3            | 3.93 | 1.57E-03 | 0.0083 |
| SPSB1            | 3.92 | 7.59E-03 | 0.0222 |
| AC010655.2       | 3.92 | 1.11E-02 | 0.0289 |
| GAPDH            | 3.92 | 2.33E-06 | 0.0008 |
| PLTP             | 3.91 | 5.51E-03 | 0.0180 |
| ENST000003549190 | 3.91 | 5.04E-05 | 0.0017 |
| TUBB6            | 3.90 | 3.07E-04 | 0.0036 |
| LINC01480        | 3.90 | 2.18E-05 | 0.0012 |
| CU639417.1       | 3.89 | 3.74E-05 | 0.0015 |
| H2BFS            | 3.89 | 3.74E-05 | 0.0015 |
| GINS1            | 3.89 | 1.29E-05 | 0.0010 |
| PAICS            | 3.89 | 5.12E-06 | 0.0009 |
| AL360181.3       | 3.89 | 2.35E-02 | 0.0493 |
| OASL             | 3.89 | 1.25E-04 | 0.0025 |
| CXCL10           | 3.89 | 2.38E-03 | 0.0106 |
| CENPN            | 3.89 | 8.81E-06 | 0.0010 |
| TNFSF14          | 3.89 | 3.11E-04 | 0.0036 |
| TCF19            | 3.89 | 2.97E-05 | 0.0014 |
| CCDC150          | 3.88 | 1.53E-05 | 0.0011 |
| AC004466.2       | 3.88 | 6.05E-04 | 0.0049 |
| CHAC2            | 3.88 | 8.48E-05 | 0.0021 |
| HIST1H2BK        | 3.87 | 4.52E-06 | 0.0009 |
| RACGAP1          | 3.87 | 1.58E-05 | 0.0011 |
| PRC1             | 3.86 | 4.10E-06 | 0.0009 |
| NPTX1            | 3.86 | 1.31E-04 | 0.0025 |

|                  |      |          |        |
|------------------|------|----------|--------|
| ILDR2            | 3.86 | 1.96E-04 | 0.0030 |
| NHS              | 3.86 | 1.76E-03 | 0.0089 |
| CCNF             | 3.85 | 1.08E-05 | 0.0010 |
| AL031846.1       | 3.85 | 1.12E-02 | 0.0291 |
| HIST1H3H         | 3.85 | 7.58E-06 | 0.0010 |
| TPI1             | 3.84 | 9.12E-06 | 0.0010 |
| ENST000003304300 | 3.84 | 2.10E-02 | 0.0454 |
| CIP2A            | 3.84 | 1.38E-05 | 0.0011 |
| SHMT2            | 3.83 | 4.35E-06 | 0.0009 |
| ENST000002595230 | 3.83 | 8.91E-03 | 0.0248 |
| CTNNAL1          | 3.83 | 5.36E-05 | 0.0017 |
| CD109            | 3.82 | 1.06E-05 | 0.0010 |
| ROCK1P1          | 3.82 | 6.08E-04 | 0.0049 |
| ENST000003411810 | 3.82 | 5.33E-06 | 0.0009 |
| AC006329.1       | 3.81 | 1.24E-03 | 0.0073 |
| CDC7             | 3.81 | 8.11E-03 | 0.0233 |
| ENST000002863981 | 3.81 | 2.96E-04 | 0.0035 |
| FURIN            | 3.81 | 1.36E-03 | 0.0076 |
| SPAG1            | 3.80 | 1.29E-05 | 0.0010 |
| ENST000002703011 | 3.80 | 1.32E-04 | 0.0025 |
| AL109918.1       | 3.80 | 3.11E-03 | 0.0124 |
| TTC25            | 3.80 | 7.21E-04 | 0.0054 |
| DHFR             | 3.80 | 7.20E-06 | 0.0010 |
| PROB1            | 3.79 | 2.01E-04 | 0.0030 |
| HMGB3            | 3.79 | 1.64E-04 | 0.0028 |
| FEN1             | 3.79 | 1.16E-05 | 0.0010 |
| HSPA1B           | 3.78 | 3.58E-05 | 0.0015 |
| HS6ST2           | 3.78 | 5.60E-03 | 0.0182 |
| B4GALT2          | 3.78 | 4.12E-05 | 0.0016 |
| HIST1H2AB        | 3.77 | 8.24E-06 | 0.0010 |
| MCM7             | 3.77 | 6.76E-06 | 0.0010 |
| AC112496.1       | 3.76 | 3.65E-04 | 0.0039 |
| WASF1            | 3.76 | 1.53E-02 | 0.0362 |
| ENST000003157112 | 3.76 | 4.78E-05 | 0.0016 |
| C2orf48          | 3.76 | 2.07E-04 | 0.0030 |
| TRPC3            | 3.75 | 1.23E-03 | 0.0073 |
| LINC01132        | 3.75 | 7.12E-05 | 0.0019 |
| HIST1H2BE        | 3.74 | 8.80E-06 | 0.0010 |
| C4orf47          | 3.74 | 3.79E-03 | 0.0141 |
| AL162231.1       | 3.74 | 9.91E-03 | 0.0266 |
| ENST000002795501 | 3.73 | 3.23E-05 | 0.0014 |
| ENST000002214130 | 3.73 | 1.65E-04 | 0.0028 |
| HIST1H2BB        | 3.73 | 1.19E-04 | 0.0024 |
| RPL39L           | 3.72 | 1.15E-04 | 0.0024 |
| SNRNP25          | 3.72 | 1.30E-04 | 0.0025 |
| ENST000003423860 | 3.72 | 1.16E-05 | 0.0010 |
| AGRN             | 3.72 | 5.23E-04 | 0.0045 |

|                  |      |          |        |
|------------------|------|----------|--------|
| HIST1H4D         | 3.72 | 5.49E-06 | 0.0009 |
| TUBG1            | 3.72 | 1.32E-04 | 0.0025 |
| NME1             | 3.71 | 5.30E-05 | 0.0017 |
| CGREF1           | 3.71 | 1.51E-04 | 0.0026 |
| SPHK1            | 3.71 | 6.51E-05 | 0.0019 |
| PRR11            | 3.71 | 3.96E-05 | 0.0016 |
| CDT1             | 3.70 | 6.74E-05 | 0.0019 |
| ENST000003615720 | 3.70 | 9.05E-05 | 0.0022 |
| ICAM1            | 3.70 | 9.39E-05 | 0.0022 |
| ENST000002913580 | 3.70 | 2.02E-03 | 0.0096 |
| ENO1             | 3.70 | 6.84E-06 | 0.0010 |
| TMEM97           | 3.69 | 8.53E-05 | 0.0021 |
| AC051619.8       | 3.69 | 1.67E-04 | 0.0028 |
| GGH              | 3.68 | 4.94E-05 | 0.0017 |
| ECT2             | 3.68 | 4.85E-06 | 0.0009 |
| STIL             | 3.68 | 3.93E-05 | 0.0016 |
| ENST000002298541 | 3.68 | 8.17E-06 | 0.0010 |
| PLK4             | 3.68 | 4.20E-06 | 0.0009 |
| ANKRD13B         | 3.67 | 2.76E-04 | 0.0034 |
| SEMA4A           | 3.67 | 1.45E-03 | 0.0079 |
| BUB1             | 3.67 | 7.79E-05 | 0.0020 |
| ENST000002860310 | 3.66 | 3.09E-04 | 0.0036 |
| TIPIN            | 3.66 | 2.24E-05 | 0.0012 |
| ENST000003286970 | 3.66 | 1.42E-04 | 0.0026 |
| GSTA4            | 3.66 | 3.61E-05 | 0.0015 |
| TST              | 3.65 | 2.15E-03 | 0.0099 |
| PCLAF            | 3.65 | 2.06E-05 | 0.0012 |
| C1orf74          | 3.65 | 4.52E-05 | 0.0016 |
| HIST2H2BF        | 3.65 | 8.17E-06 | 0.0010 |
| PHKA1            | 3.64 | 4.30E-04 | 0.0041 |
| KCNK1            | 3.64 | 1.27E-02 | 0.0318 |
| COLGALT2         | 3.64 | 1.13E-04 | 0.0024 |
| C19orf57         | 3.64 | 1.93E-04 | 0.0029 |
| HIST1H2BF        | 3.64 | 7.29E-06 | 0.0010 |
| MAD2L1           | 3.64 | 5.85E-06 | 0.0009 |
| MIR210HG         | 3.64 | 2.20E-04 | 0.0031 |
| ASB2             | 3.63 | 2.07E-02 | 0.0450 |
| CDK2AP1          | 3.63 | 1.13E-05 | 0.0010 |
| ARNTL2           | 3.63 | 1.01E-05 | 0.0010 |
| AHCY             | 3.62 | 8.49E-06 | 0.0010 |
| TERT             | 3.61 | 2.53E-03 | 0.0110 |
| TRIP10           | 3.61 | 2.47E-04 | 0.0032 |
| EVI5             | 3.61 | 1.62E-03 | 0.0085 |
| ENST000002957462 | 3.60 | 2.34E-05 | 0.0012 |
| TRAIP            | 3.60 | 5.24E-05 | 0.0017 |
| TIMELESS         | 3.60 | 7.38E-06 | 0.0010 |
| BLM              | 3.60 | 2.00E-05 | 0.0012 |

|                  |      |          |        |
|------------------|------|----------|--------|
| GPT2             | 3.60 | 3.97E-05 | 0.0016 |
| ENST000002166052 | 3.59 | 2.79E-05 | 0.0014 |
| RCC1             | 3.59 | 5.22E-05 | 0.0017 |
| ENST000003352091 | 3.59 | 2.81E-04 | 0.0035 |
| PCK2             | 3.59 | 1.58E-05 | 0.0011 |
| HRH1             | 3.58 | 6.01E-03 | 0.0190 |
| ENST000003160773 | 3.58 | 2.16E-05 | 0.0012 |
| DIXDC1           | 3.58 | 1.11E-03 | 0.0068 |
| EML2-AS1         | 3.57 | 2.77E-04 | 0.0034 |
| HIST1H4J         | 3.57 | 4.44E-06 | 0.0009 |
| CDCA7            | 3.57 | 3.23E-05 | 0.0014 |
| AP001453.3       | 3.57 | 1.79E-03 | 0.0090 |
| PLK1             | 3.57 | 3.21E-04 | 0.0037 |
| RPL38P4          | 3.56 | 6.79E-03 | 0.0206 |
| FERMT2           | 3.55 | 1.11E-04 | 0.0023 |
| CISH             | 3.54 | 2.31E-05 | 0.0012 |
| ZCCHC12          | 3.53 | 2.18E-02 | 0.0467 |
| AL390719.1       | 3.53 | 8.59E-05 | 0.0021 |
| HSD11B1-AS1      | 3.53 | 2.85E-04 | 0.0035 |
| AC099552.1       | 3.53 | 1.28E-02 | 0.0318 |
| GALK1            | 3.52 | 3.07E-04 | 0.0036 |
| EXOSC4           | 3.52 | 2.92E-04 | 0.0035 |
| SQLE             | 3.51 | 1.38E-05 | 0.0011 |
| TXN              | 3.51 | 9.65E-06 | 0.0010 |
| RN7SL3           | 3.51 | 2.21E-04 | 0.0031 |
| NEURL3           | 3.50 | 1.82E-03 | 0.0091 |
| GNA15            | 3.49 | 8.50E-04 | 0.0059 |
| FANCA            | 3.49 | 1.48E-05 | 0.0011 |
| CENPM            | 3.49 | 5.60E-05 | 0.0017 |
| ENST000002579040 | 3.48 | 2.29E-05 | 0.0012 |
| GMNN             | 3.48 | 1.63E-05 | 0.0011 |
| GTSE1            | 3.48 | 5.43E-05 | 0.0017 |
| NTRK2            | 3.48 | 7.06E-03 | 0.0212 |
| C5orf34          | 3.48 | 2.20E-05 | 0.0012 |
| MERTK            | 3.47 | 9.96E-04 | 0.0064 |
| LDHA             | 3.47 | 6.36E-06 | 0.0010 |
| FANCI            | 3.46 | 3.69E-05 | 0.0015 |
| PDCD1            | 3.46 | 1.55E-04 | 0.0027 |
| ENST000003253071 | 3.46 | 7.32E-05 | 0.0020 |
| UBE2S            | 3.45 | 3.76E-05 | 0.0015 |
| SESN2            | 3.44 | 3.39E-05 | 0.0015 |
| SLC7A5           | 3.43 | 1.48E-04 | 0.0026 |
| NT5DC2           | 3.43 | 1.20E-04 | 0.0024 |
| BRCA2            | 3.43 | 4.24E-05 | 0.0016 |
| RAB33A           | 3.43 | 3.26E-05 | 0.0014 |
| QPCT             | 3.43 | 2.77E-03 | 0.0116 |
| SPC24            | 3.43 | 1.80E-05 | 0.0011 |



|                  |      |          |        |
|------------------|------|----------|--------|
| RDH10            | 3.42 | 1.16E-05 | 0.0010 |
| ESCO2            | 3.42 | 2.17E-04 | 0.0031 |
| CTH              | 3.41 | 1.04E-04 | 0.0023 |
| FTH1P22          | 3.41 | 1.36E-03 | 0.0076 |
| LAG3             | 3.41 | 1.02E-03 | 0.0065 |
| HIST1H2AD        | 3.41 | 5.79E-06 | 0.0009 |
| ARHGEF25         | 3.40 | 1.51E-03 | 0.0081 |
| ENST000003197881 | 3.40 | 1.49E-02 | 0.0356 |
| DNA2             | 3.40 | 1.78E-05 | 0.0011 |
| HIST1H2AM        | 3.40 | 1.79E-05 | 0.0011 |
| AC005943.1       | 3.40 | 2.06E-04 | 0.0030 |
| ENST000003175510 | 3.40 | 3.99E-04 | 0.0040 |
| ENST000003010680 | 3.40 | 6.21E-03 | 0.0194 |
| RPUSD2           | 3.39 | 2.47E-04 | 0.0032 |
| RFC2             | 3.39 | 1.52E-05 | 0.0011 |
| SERPINE2         | 3.39 | 3.03E-03 | 0.0122 |
| ENST000003545990 | 3.38 | 6.22E-03 | 0.0194 |
| ATAD5            | 3.38 | 7.54E-06 | 0.0010 |
| ENST000002679502 | 3.38 | 1.08E-04 | 0.0023 |
| ENST000002331142 | 3.37 | 5.62E-05 | 0.0017 |
| PPP4R4           | 3.37 | 7.10E-05 | 0.0019 |
| PDLIM7           | 3.36 | 1.49E-03 | 0.0081 |
| LMNA             | 3.36 | 5.00E-04 | 0.0045 |
| VDAC1            | 3.35 | 9.91E-06 | 0.0010 |
| SCCPDH           | 3.34 | 1.72E-04 | 0.0028 |
| HIST1H2AG        | 3.34 | 6.30E-06 | 0.0010 |
| AC108879.1       | 3.34 | 2.11E-03 | 0.0098 |
| GOT1             | 3.34 | 8.80E-06 | 0.0010 |
| HIST1H1A         | 3.34 | 3.24E-04 | 0.0037 |
| PPP1R14B         | 3.34 | 8.06E-05 | 0.0020 |
| RFC4             | 3.33 | 2.21E-05 | 0.0012 |
| LMNB1            | 3.33 | 9.26E-06 | 0.0010 |
| ENST000002965090 | 3.33 | 5.63E-05 | 0.0017 |
| ENST000002617722 | 3.32 | 2.82E-05 | 0.0014 |
| CORO6            | 3.30 | 5.47E-05 | 0.0017 |
| MRPL17           | 3.30 | 4.69E-05 | 0.0016 |
| FAH              | 3.30 | 1.02E-04 | 0.0023 |
| NEFH             | 3.30 | 3.77E-04 | 0.0039 |
| TOMM34           | 3.29 | 6.72E-05 | 0.0019 |
| PLAGL2           | 3.29 | 1.16E-04 | 0.0024 |
| HIST1H4F         | 3.29 | 5.82E-06 | 0.0009 |
| FAM131B          | 3.28 | 1.65E-03 | 0.0086 |
| LONP1            | 3.28 | 1.41E-05 | 0.0011 |
| THOP1            | 3.28 | 5.33E-05 | 0.0017 |
| CCDC51           | 3.27 | 1.38E-04 | 0.0026 |
| KL               | 3.27 | 5.46E-03 | 0.0179 |
| ACOT7            | 3.26 | 4.58E-05 | 0.0016 |

|                  |      |          |        |
|------------------|------|----------|--------|
| PKM              | 3.26 | 2.40E-05 | 0.0012 |
| WDR76            | 3.26 | 1.39E-05 | 0.0011 |
| MYL6B            | 3.26 | 7.81E-05 | 0.0020 |
| POLR3G           | 3.26 | 5.38E-05 | 0.0017 |
| GIHCG            | 3.26 | 4.12E-05 | 0.0016 |
| DTYMK            | 3.26 | 6.55E-05 | 0.0019 |
| GIN3             | 3.25 | 1.81E-04 | 0.0029 |
| ER12             | 3.25 | 2.72E-05 | 0.0013 |
| ENST000003048743 | 3.25 | 4.66E-03 | 0.0161 |
| SLC35G2          | 3.25 | 7.74E-04 | 0.0056 |
| AC147651.3       | 3.25 | 3.20E-05 | 0.0014 |
| AL591806.3       | 3.25 | 8.77E-04 | 0.0060 |
| DARS2            | 3.25 | 8.93E-06 | 0.0010 |
| RMI1             | 3.24 | 2.47E-05 | 0.0013 |
| ENST000002400790 | 3.24 | 4.69E-05 | 0.0016 |
| ENST000003131150 | 3.24 | 1.45E-04 | 0.0026 |
| AL391832.3       | 3.24 | 5.70E-04 | 0.0048 |
| SLC39A14         | 3.23 | 2.59E-05 | 0.0013 |
| POLD1            | 3.23 | 2.24E-05 | 0.0012 |
| ENST000002528160 | 3.23 | 1.71E-05 | 0.0011 |
| DCTPP1           | 3.23 | 1.39E-04 | 0.0026 |
| TPI1P1           | 3.23 | 2.85E-03 | 0.0118 |
| CCNE2            | 3.23 | 4.04E-04 | 0.0040 |
| ENST000002645523 | 3.22 | 3.00E-05 | 0.0014 |
| ENST000002943041 | 3.22 | 4.12E-04 | 0.0041 |
| ZNF593           | 3.22 | 1.77E-04 | 0.0028 |
| HMGCS1           | 3.22 | 5.63E-05 | 0.0017 |
| H2AFZ            | 3.22 | 1.64E-05 | 0.0011 |
| KCNC3            | 3.22 | 3.19E-03 | 0.0126 |
| C3orf14          | 3.21 | 7.48E-05 | 0.0020 |
| PVR              | 3.21 | 7.99E-05 | 0.0020 |
| N4BP3            | 3.21 | 1.34E-03 | 0.0076 |
| STIP1            | 3.20 | 3.62E-05 | 0.0015 |
| TTC23            | 3.20 | 1.01E-04 | 0.0022 |
| GPN3             | 3.20 | 3.19E-05 | 0.0014 |
| AC092718.4       | 3.20 | 2.70E-04 | 0.0034 |
| CA2              | 3.19 | 2.06E-03 | 0.0097 |
| CD27-AS1         | 3.19 | 7.81E-05 | 0.0020 |
| ARHGEF39         | 3.19 | 1.08E-04 | 0.0023 |
| SLC22A4          | 3.18 | 2.09E-03 | 0.0098 |
| PIF1             | 3.18 | 1.39E-04 | 0.0026 |
| AL590399.1       | 3.18 | 8.95E-04 | 0.0061 |
| RANBP1           | 3.18 | 6.24E-05 | 0.0018 |
| SMC2             | 3.18 | 1.05E-05 | 0.0010 |
| MCM6             | 3.18 | 1.36E-05 | 0.0011 |
| ENST000002716361 | 3.18 | 2.18E-03 | 0.0100 |
| HIST1H4H         | 3.17 | 1.32E-05 | 0.0010 |

|                  |      |          |        |
|------------------|------|----------|--------|
| ENST000003322110 | 3.17 | 1.47E-05 | 0.0011 |
| ENST000003574290 | 3.17 | 8.99E-04 | 0.0061 |
| HSPD1            | 3.16 | 3.87E-05 | 0.0016 |
| VLDLR            | 3.16 | 7.08E-04 | 0.0054 |
| HIST1H3I         | 3.16 | 7.91E-05 | 0.0020 |
| GSTO1            | 3.16 | 1.80E-05 | 0.0011 |
| NEIL3            | 3.16 | 7.55E-05 | 0.0020 |
| HIST1H4C         | 3.15 | 8.30E-06 | 0.0010 |
| GNGT2            | 3.14 | 1.73E-04 | 0.0028 |
| ENST000003296080 | 3.14 | 1.06E-04 | 0.0023 |
| NFIL3            | 3.14 | 3.47E-03 | 0.0133 |
| TNFSF11          | 3.14 | 1.36E-04 | 0.0025 |
| ENST000002808920 | 3.13 | 1.13E-03 | 0.0069 |
| SPDL1            | 3.13 | 3.77E-05 | 0.0015 |
| DCLRE1B          | 3.13 | 3.72E-05 | 0.0015 |
| UACA             | 3.13 | 2.69E-04 | 0.0034 |
| INCENP           | 3.13 | 1.88E-05 | 0.0011 |
| PALLD            | 3.13 | 2.39E-03 | 0.0106 |
| AMACR            | 3.12 | 8.99E-05 | 0.0022 |
| BLVRB            | 3.12 | 4.37E-05 | 0.0016 |
| CDK2             | 3.12 | 1.11E-05 | 0.0010 |
| STX1A            | 3.12 | 9.21E-05 | 0.0022 |
| DGUOK-AS1        | 3.11 | 6.69E-03 | 0.0204 |
| SHF              | 3.11 | 1.71E-04 | 0.0028 |
| ENST000002603241 | 3.10 | 4.41E-03 | 0.0155 |
| ZBED9            | 3.10 | 9.59E-04 | 0.0063 |
| ENST000002615070 | 3.10 | 4.39E-04 | 0.0042 |
| NCAPD2           | 3.10 | 2.32E-05 | 0.0012 |
| CHRNA6           | 3.10 | 1.53E-03 | 0.0082 |
| BCL2L1           | 3.10 | 3.36E-05 | 0.0015 |
| CENPO            | 3.09 | 1.48E-04 | 0.0026 |
| HMGA1            | 3.09 | 2.54E-04 | 0.0033 |
| MIF              | 3.09 | 5.56E-05 | 0.0017 |
| SLC41A2          | 3.09 | 2.13E-05 | 0.0012 |
| AL445524.1       | 3.09 | 3.56E-04 | 0.0038 |
| ANKRD7           | 3.09 | 5.46E-04 | 0.0046 |
| ENST000002664810 | 3.08 | 1.06E-04 | 0.0023 |
| IRF8             | 3.07 | 2.76E-04 | 0.0034 |
| NRSN2-AS1        | 3.06 | 3.73E-04 | 0.0039 |
| TUBB4B           | 3.06 | 2.04E-04 | 0.0030 |
| ENST000003386631 | 3.06 | 9.54E-03 | 0.0260 |
| MCM5             | 3.06 | 1.29E-05 | 0.0010 |
| TTC26            | 3.05 | 1.54E-04 | 0.0027 |
| IMPDH2           | 3.05 | 1.10E-05 | 0.0010 |
| AC234772.2       | 3.05 | 1.23E-03 | 0.0072 |
| FRMD6            | 3.05 | 4.31E-05 | 0.0016 |
| RPL22L1          | 3.05 | 1.51E-05 | 0.0011 |

|                  |      |          |        |
|------------------|------|----------|--------|
| GGCT             | 3.04 | 1.16E-05 | 0.0010 |
| SLC39A1          | 3.04 | 1.80E-05 | 0.0011 |
| FOXM1            | 3.04 | 6.27E-04 | 0.0050 |
| ENST000003027631 | 3.04 | 7.09E-05 | 0.0019 |
| PA2G4            | 3.04 | 2.56E-05 | 0.0013 |
| MRPS26           | 3.03 | 1.01E-04 | 0.0022 |
| ANKRD18DP        | 3.03 | 5.13E-04 | 0.0045 |
| ZNF367           | 3.03 | 7.39E-05 | 0.0020 |
| HIST1H2AE        | 3.03 | 3.23E-05 | 0.0014 |
| CORO1C           | 3.03 | 1.19E-04 | 0.0024 |
| MRC2             | 3.02 | 3.79E-04 | 0.0039 |
| ENST000002489240 | 3.02 | 6.20E-05 | 0.0018 |
| NUDT10           | 3.02 | 1.82E-03 | 0.0091 |
| HIST1H2BI        | 3.02 | 1.12E-05 | 0.0010 |
| LRFN4            | 3.02 | 2.87E-04 | 0.0035 |
| ENST000002566860 | 3.02 | 4.94E-05 | 0.0017 |
| ALDOA            | 3.02 | 1.42E-05 | 0.0011 |
| EGFL6            | 3.01 | 1.63E-03 | 0.0085 |
| PARPBP           | 3.01 | 2.26E-05 | 0.0012 |
| PRDX3            | 3.01 | 2.23E-05 | 0.0012 |
| LOXL3            | 3.01 | 2.97E-03 | 0.0121 |
| CBR3             | 3.01 | 4.18E-04 | 0.0041 |
| KCNN4            | 3.00 | 3.11E-04 | 0.0036 |
| MRPL37           | 3.00 | 1.67E-05 | 0.0011 |
| FGF2             | 3.00 | 2.66E-04 | 0.0034 |
| MRM1             | 3.00 | 5.14E-05 | 0.0017 |
| PXDC1            | 3.00 | 6.82E-03 | 0.0207 |
| GPR19            | 2.99 | 2.01E-04 | 0.0030 |
| EBNA1BP2         | 2.99 | 1.32E-04 | 0.0025 |
| GAS2L3           | 2.99 | 1.38E-03 | 0.0077 |
| ENST000003234410 | 2.99 | 9.27E-03 | 0.0254 |
| ENST000003200951 | 2.99 | 1.93E-02 | 0.0429 |
| NOCT             | 2.98 | 8.94E-05 | 0.0021 |
| RFC5             | 2.98 | 6.84E-05 | 0.0019 |
| ENST000003113370 | 2.98 | 8.58E-05 | 0.0021 |
| ENST000003192482 | 2.98 | 1.74E-04 | 0.0028 |
| COPZ2            | 2.98 | 2.53E-03 | 0.0110 |
| LGALS1           | 2.98 | 2.78E-04 | 0.0034 |
| RNASEH2A         | 2.98 | 6.45E-05 | 0.0019 |
| ENST000002289551 | 2.97 | 5.41E-05 | 0.0017 |
| SNORD3B-1        | 2.97 | 7.45E-04 | 0.0055 |
| MID1IP1          | 2.96 | 2.45E-05 | 0.0013 |
| ENST000002369593 | 2.96 | 3.66E-04 | 0.0039 |
| CCDC86           | 2.96 | 8.73E-04 | 0.0060 |
| TMCC2            | 2.96 | 3.27E-03 | 0.0128 |
| CDKN1A           | 2.96 | 3.01E-04 | 0.0035 |
| GALE             | 2.96 | 3.03E-05 | 0.0014 |

|                  |      |          |        |
|------------------|------|----------|--------|
| LMNB2            | 2.95 | 2.26E-05 | 0.0012 |
| EZH2             | 2.95 | 1.80E-05 | 0.0011 |
| PFKM             | 2.95 | 2.50E-05 | 0.0013 |
| FAM111B          | 2.95 | 1.89E-03 | 0.0092 |
| SLC16A1          | 2.95 | 4.30E-05 | 0.0016 |
| ENST000003251100 | 2.95 | 2.17E-05 | 0.0012 |
| TONSL            | 2.95 | 2.40E-04 | 0.0032 |
| HMBS             | 2.94 | 1.36E-03 | 0.0076 |
| C9orf40          | 2.94 | 3.67E-04 | 0.0039 |
| ATAD3A           | 2.94 | 3.60E-04 | 0.0038 |
| FLVCR2           | 2.94 | 5.69E-03 | 0.0184 |
| SLC38A5          | 2.94 | 1.01E-04 | 0.0022 |
| PHPT1            | 2.94 | 7.25E-05 | 0.0020 |
| TARS             | 2.93 | 9.60E-06 | 0.0010 |
| NDC80            | 2.93 | 1.24E-05 | 0.0010 |
| MT-TP            | 2.93 | 3.91E-03 | 0.0143 |
| MRPL12           | 2.93 | 4.75E-05 | 0.0016 |
| HIST1H2BC        | 2.93 | 3.32E-05 | 0.0015 |
| SYNGR3           | 2.92 | 6.88E-03 | 0.0208 |
| TMEM217          | 2.92 | 4.06E-03 | 0.0147 |
| ENST000003334791 | 2.91 | 1.85E-05 | 0.0011 |
| HELLS            | 2.91 | 1.70E-05 | 0.0011 |
| LRP8             | 2.91 | 2.97E-04 | 0.0035 |
| MCM8             | 2.91 | 2.24E-05 | 0.0012 |
| ALDH1B1          | 2.91 | 3.05E-04 | 0.0036 |
| ENST000003381930 | 2.91 | 2.75E-05 | 0.0014 |
| TTLL12           | 2.90 | 4.73E-04 | 0.0044 |
| ENST00000379612  | 2.90 | 9.73E-05 | 0.0022 |
| ENST000003088600 | 2.90 | 9.05E-03 | 0.0250 |
| RF00003.22       | 2.89 | 1.25E-03 | 0.0073 |
| FANCG            | 2.89 | 2.95E-05 | 0.0014 |
| GSDME            | 2.89 | 1.23E-02 | 0.0310 |
| ENST000002710024 | 2.89 | 2.38E-04 | 0.0032 |
| ZNF704           | 2.88 | 3.71E-04 | 0.0039 |
| LINC00892        | 2.88 | 9.72E-04 | 0.0064 |
| FBXO5            | 2.88 | 6.63E-05 | 0.0019 |
| OPLAH            | 2.88 | 3.02E-03 | 0.0122 |
| SPRED2           | 2.88 | 2.23E-02 | 0.0474 |
| GLA              | 2.88 | 3.39E-05 | 0.0015 |
| HIST1H4B         | 2.88 | 1.26E-05 | 0.0010 |
| TXNDC17          | 2.87 | 5.13E-05 | 0.0017 |
| CCNE1            | 2.87 | 9.95E-05 | 0.0022 |
| ALDH4A1          | 2.87 | 1.41E-04 | 0.0026 |
| MIS18A           | 2.87 | 7.31E-05 | 0.0020 |
| GPRIN1           | 2.86 | 3.81E-03 | 0.0141 |
| CCDC34           | 2.86 | 1.26E-03 | 0.0073 |
| U62317.1         | 2.86 | 1.44E-03 | 0.0079 |

|                  |      |          |        |
|------------------|------|----------|--------|
| AC099329.1       | 2.86 | 6.82E-03 | 0.0207 |
| ATP9A            | 2.86 | 2.11E-02 | 0.0455 |
| ENST000002820580 | 2.85 | 2.63E-05 | 0.0013 |
| RFC3             | 2.85 | 5.94E-05 | 0.0018 |
| ENTHD1           | 2.85 | 1.07E-02 | 0.0281 |
| AC013460.1       | 2.84 | 6.05E-03 | 0.0191 |
| VARS             | 2.84 | 2.01E-05 | 0.0012 |
| FSCN1            | 2.84 | 2.44E-03 | 0.0108 |
| ENST000002707081 | 2.84 | 2.05E-02 | 0.0446 |
| GARS             | 2.84 | 2.83E-05 | 0.0014 |
| TRAP1            | 2.83 | 2.45E-05 | 0.0013 |
| LRR1             | 2.83 | 4.00E-05 | 0.0016 |
| MIR222HG         | 2.83 | 4.43E-05 | 0.0016 |
| MPZL1            | 2.83 | 2.78E-05 | 0.0014 |
| SPTBN4           | 2.83 | 2.47E-03 | 0.0108 |
| LAMP3            | 2.82 | 2.23E-03 | 0.0101 |
| AK6              | 2.82 | 3.22E-05 | 0.0014 |
| NPM1P9           | 2.82 | 6.66E-03 | 0.0204 |
| HIST3H2BB        | 2.82 | 1.97E-04 | 0.0030 |
| ABCA1            | 2.82 | 5.40E-03 | 0.0177 |
| PPIL1            | 2.81 | 7.46E-05 | 0.0020 |
| ACY1             | 2.81 | 1.81E-04 | 0.0029 |
| LIMA1            | 2.81 | 3.60E-05 | 0.0015 |
| COX8A            | 2.81 | 4.05E-05 | 0.0016 |
| ENST000003227760 | 2.81 | 3.30E-05 | 0.0015 |
| OXCT2            | 2.81 | 8.56E-03 | 0.0241 |
| ENST000002993000 | 2.80 | 7.57E-05 | 0.0020 |
| PSPH             | 2.80 | 1.65E-04 | 0.0028 |
| ENST000003287031 | 2.80 | 2.19E-05 | 0.0012 |
| ENST000002625070 | 2.80 | 6.23E-05 | 0.0018 |
| MRPL51           | 2.80 | 2.43E-04 | 0.0032 |
| NFE2L3           | 2.80 | 8.89E-05 | 0.0021 |
| ALPK2            | 2.80 | 1.01E-04 | 0.0022 |
| POLD2            | 2.79 | 1.16E-04 | 0.0024 |
| HSPE1            | 2.79 | 2.59E-04 | 0.0033 |
| NOP16            | 2.79 | 3.28E-04 | 0.0037 |
| PCBD1            | 2.78 | 6.89E-05 | 0.0019 |
| THG1L            | 2.78 | 9.64E-04 | 0.0063 |
| ENST000003738330 | 2.78 | 9.79E-04 | 0.0064 |
| ENST000003146660 | 2.78 | 6.30E-05 | 0.0019 |
| MRPL15           | 2.78 | 4.46E-05 | 0.0016 |
| TRAF4            | 2.78 | 3.17E-05 | 0.0014 |
| CPS1             | 2.77 | 8.40E-05 | 0.0021 |
| PRMT1            | 2.77 | 1.72E-04 | 0.0028 |
| CSF1             | 2.77 | 2.56E-03 | 0.0111 |
| SUV39H2          | 2.77 | 7.14E-05 | 0.0020 |
| AC091057.6       | 2.77 | 3.74E-05 | 0.0015 |

|                  |      |          |        |
|------------------|------|----------|--------|
| EEF1AKMT4        | 2.77 | 4.23E-03 | 0.0152 |
| ENST000003253240 | 2.77 | 3.71E-04 | 0.0039 |
| RPL26L1          | 2.76 | 2.45E-04 | 0.0032 |
| ENST000003364521 | 2.76 | 2.18E-04 | 0.0031 |
| MICAL2           | 2.76 | 2.13E-03 | 0.0099 |
| AC004687.1       | 2.76 | 3.63E-04 | 0.0039 |
| CKB              | 2.76 | 8.81E-03 | 0.0246 |
| CENPS            | 2.76 | 1.29E-03 | 0.0074 |
| ZNRF1            | 2.76 | 1.23E-04 | 0.0025 |
| MCAT             | 2.76 | 7.78E-03 | 0.0226 |
| GPAT2            | 2.75 | 2.28E-04 | 0.0032 |
| HIST1H4A         | 2.75 | 8.66E-05 | 0.0021 |
| ENST000003299620 | 2.75 | 1.04E-02 | 0.0276 |
| EMC9             | 2.75 | 1.55E-03 | 0.0083 |
| PTPRK            | 2.75 | 2.41E-03 | 0.0107 |
| ENST000003213941 | 2.75 | 3.83E-04 | 0.0039 |
| ENST00000537344  | 2.74 | 1.07E-04 | 0.0023 |
| RIMKLA           | 2.74 | 7.56E-04 | 0.0055 |
| GINS4            | 2.74 | 3.99E-05 | 0.0016 |
| AC135977.1       | 2.74 | 3.62E-04 | 0.0038 |
| ENST000003522971 | 2.74 | 1.74E-04 | 0.0028 |
| CDCA4            | 2.73 | 2.88E-05 | 0.0014 |
| FASLG            | 2.73 | 1.42E-04 | 0.0026 |
| RUVBL2           | 2.73 | 1.76E-04 | 0.0028 |
| LSM2             | 2.73 | 1.08E-03 | 0.0067 |
| SMS              | 2.73 | 6.44E-05 | 0.0019 |
| GART             | 2.73 | 2.92E-05 | 0.0014 |
| PAK1IP1          | 2.73 | 4.24E-04 | 0.0041 |
| ENST000002657092 | 2.73 | 9.76E-03 | 0.0263 |
| PRDX1            | 2.72 | 2.97E-04 | 0.0035 |
| ALYREF           | 2.72 | 2.65E-04 | 0.0034 |
| AC073611.1       | 2.72 | 2.72E-03 | 0.0115 |
| RBFOX2           | 2.72 | 6.47E-04 | 0.0051 |
| LSM4             | 2.72 | 3.99E-05 | 0.0016 |
| AL391832.2       | 2.72 | 1.72E-02 | 0.0394 |
| TEX15            | 2.72 | 2.44E-03 | 0.0107 |
| MRTO4            | 2.72 | 3.84E-04 | 0.0039 |
| E2F7             | 2.72 | 2.28E-02 | 0.0482 |
| GEM              | 2.71 | 4.89E-04 | 0.0044 |
| TG               | 2.71 | 4.25E-04 | 0.0041 |
| FKBP4            | 2.71 | 9.52E-05 | 0.0022 |
| BCAT1            | 2.71 | 6.86E-05 | 0.0019 |
| ALAS1            | 2.71 | 6.41E-05 | 0.0019 |
| PNP              | 2.71 | 1.71E-05 | 0.0011 |
| BBS12            | 2.71 | 5.33E-03 | 0.0176 |
| ENST000002556741 | 2.71 | 4.28E-04 | 0.0041 |
| SMCO4            | 2.71 | 1.08E-04 | 0.0023 |

|                  |      |          |        |
|------------------|------|----------|--------|
| GLB1L2           | 2.71 | 1.04E-03 | 0.0066 |
| FDPS             | 2.70 | 1.62E-05 | 0.0011 |
| WDR54            | 2.70 | 3.96E-05 | 0.0016 |
| RPA3             | 2.70 | 3.49E-05 | 0.0015 |
| CENPQ            | 2.70 | 2.56E-04 | 0.0033 |
| CACYBP           | 2.70 | 6.56E-05 | 0.0019 |
| ENST000003033050 | 2.70 | 1.58E-04 | 0.0027 |
| AJM1             | 2.70 | 5.17E-04 | 0.0045 |
| ATAD2            | 2.70 | 2.00E-05 | 0.0012 |
| CHAF1A           | 2.70 | 2.60E-05 | 0.0013 |
| PMAIP1           | 2.70 | 6.56E-05 | 0.0019 |
| MT2A             | 2.70 | 3.29E-04 | 0.0037 |
| AL031777.3       | 2.70 | 4.59E-05 | 0.0016 |
| SNHG4            | 2.69 | 3.41E-05 | 0.0015 |
| ENST000003334834 | 2.69 | 1.01E-04 | 0.0022 |
| ENST000002639850 | 2.69 | 4.13E-03 | 0.0149 |
| ENST000003364301 | 2.69 | 1.16E-03 | 0.0070 |
| RYR1             | 2.69 | 9.88E-05 | 0.0022 |
| KIF7             | 2.69 | 2.00E-03 | 0.0095 |
| CCT5             | 2.69 | 1.07E-04 | 0.0023 |
| AC009237.3       | 2.68 | 8.00E-04 | 0.0057 |
| COQ3             | 2.68 | 1.41E-04 | 0.0026 |
| POP7             | 2.68 | 1.82E-04 | 0.0029 |
| MAD2L2           | 2.68 | 1.12E-04 | 0.0024 |
| PDF              | 2.68 | 1.75E-03 | 0.0089 |
| ENST000003594290 | 2.68 | 6.26E-05 | 0.0018 |
| ENST000002903490 | 2.67 | 4.41E-05 | 0.0016 |
| UTP11            | 2.67 | 9.92E-05 | 0.0022 |
| PDCD2L           | 2.67 | 6.62E-05 | 0.0019 |
| FIGNL1           | 2.67 | 8.30E-05 | 0.0021 |
| RTN2             | 2.67 | 6.04E-03 | 0.0191 |
| AC141586.1       | 2.67 | 4.20E-04 | 0.0041 |
| GALM             | 2.66 | 9.15E-05 | 0.0022 |
| IL10             | 2.66 | 1.05E-02 | 0.0278 |
| PHB              | 2.66 | 1.89E-04 | 0.0029 |
| BCL2L12          | 2.66 | 4.94E-04 | 0.0044 |
| SPX              | 2.66 | 3.12E-03 | 0.0124 |
| FZD5             | 2.66 | 3.47E-03 | 0.0133 |
| GRK3             | 2.66 | 1.27E-04 | 0.0025 |
| GLO1             | 2.65 | 1.18E-04 | 0.0024 |
| CSTF2            | 2.65 | 8.57E-05 | 0.0021 |
| TCEAL9           | 2.65 | 2.56E-04 | 0.0033 |
| PIR              | 2.65 | 3.71E-03 | 0.0139 |
| GSTP1            | 2.65 | 7.06E-05 | 0.0019 |
| LAP3             | 2.65 | 2.33E-05 | 0.0012 |
| CORO1B           | 2.65 | 8.42E-05 | 0.0021 |
| ZNF165           | 2.65 | 2.76E-04 | 0.0034 |



|                  |      |          |        |
|------------------|------|----------|--------|
| STOML2           | 2.65 | 4.35E-05 | 0.0016 |
| PARVB            | 2.64 | 7.22E-05 | 0.0020 |
| EIF2S2           | 2.64 | 1.21E-05 | 0.0010 |
| ENST000002916340 | 2.64 | 3.34E-04 | 0.0037 |
| TBX21            | 2.64 | 3.32E-04 | 0.0037 |
| AP002852.1       | 2.64 | 2.40E-03 | 0.0106 |
| MACROD1          | 2.63 | 2.52E-04 | 0.0033 |
| CYP51A1          | 2.63 | 2.14E-04 | 0.0031 |
| ASNS             | 2.63 | 3.01E-05 | 0.0014 |
| SPINT1           | 2.63 | 1.86E-04 | 0.0029 |
| C1QBP            | 2.63 | 7.62E-05 | 0.0020 |
| SLC7A1           | 2.63 | 1.86E-04 | 0.0029 |
| DONSON           | 2.63 | 4.25E-05 | 0.0016 |
| NUDT11           | 2.63 | 1.69E-04 | 0.0028 |
| HAVCR2           | 2.62 | 8.23E-04 | 0.0058 |
| NME2             | 2.62 | 5.14E-05 | 0.0017 |
| CALM3            | 2.62 | 4.67E-05 | 0.0016 |
| MIR663A          | 2.62 | 7.24E-04 | 0.0054 |
| ENST000003278000 | 2.62 | 6.52E-05 | 0.0019 |
| DUT              | 2.62 | 6.46E-05 | 0.0019 |
| BNIP3            | 2.62 | 2.11E-05 | 0.0012 |
| ENST000002387883 | 2.62 | 1.81E-02 | 0.0409 |
| ENST000003165434 | 2.61 | 6.17E-03 | 0.0194 |
| NEMP1            | 2.61 | 4.68E-05 | 0.0016 |
| ZNF436-AS1       | 2.61 | 2.09E-03 | 0.0098 |
| HNRNPAB          | 2.61 | 6.77E-04 | 0.0052 |
| CCDC58           | 2.60 | 5.38E-05 | 0.0017 |
| ENST000003516250 | 2.60 | 4.90E-04 | 0.0044 |
| ENST000002886703 | 2.60 | 1.28E-03 | 0.0074 |
| MAP3K20-AS1      | 2.60 | 4.06E-03 | 0.0147 |
| NUDT1            | 2.60 | 3.91E-04 | 0.0040 |
| ENST000003559680 | 2.60 | 1.97E-04 | 0.0030 |
| ENO2             | 2.60 | 1.10E-04 | 0.0023 |
| PRELID1          | 2.59 | 1.04E-04 | 0.0023 |
| IKBIP            | 2.59 | 9.21E-05 | 0.0022 |
| VTRNA1-3         | 2.59 | 4.39E-04 | 0.0042 |
| HIST2H2AB        | 2.59 | 4.04E-05 | 0.0016 |
| CHPF             | 2.59 | 2.43E-04 | 0.0032 |
| UNC13B           | 2.59 | 1.04E-03 | 0.0066 |
| MED20            | 2.59 | 1.84E-04 | 0.0029 |
| CES3             | 2.59 | 1.42E-03 | 0.0078 |
| CYC1             | 2.58 | 5.20E-05 | 0.0017 |
| SVIL2P           | 2.58 | 1.34E-03 | 0.0076 |
| ZBED8            | 2.58 | 5.56E-04 | 0.0047 |
| LINC02595        | 2.58 | 1.24E-03 | 0.0073 |
| FADS1            | 2.58 | 2.02E-02 | 0.0442 |
| BRIP1            | 2.58 | 4.94E-05 | 0.0017 |

|                  |      |          |        |
|------------------|------|----------|--------|
| OAS1             | 2.58 | 1.97E-03 | 0.0095 |
| POLA2            | 2.58 | 9.52E-05 | 0.0022 |
| WEE1             | 2.58 | 4.63E-05 | 0.0016 |
| SSRP1            | 2.58 | 1.82E-05 | 0.0011 |
| WDR18            | 2.58 | 3.14E-04 | 0.0036 |
| ENST000003162181 | 2.58 | 8.37E-04 | 0.0058 |
| SPRY1            | 2.58 | 7.01E-04 | 0.0054 |
| BCAT2            | 2.57 | 1.75E-03 | 0.0089 |
| DOK4             | 2.57 | 4.98E-04 | 0.0045 |
| JOSD2            | 2.57 | 1.27E-03 | 0.0074 |
| ARFGEF3          | 2.57 | 9.58E-03 | 0.0260 |
| SMOX             | 2.57 | 1.03E-02 | 0.0273 |
| HSP90AB1         | 2.57 | 3.32E-05 | 0.0015 |
| AC004816.1       | 2.57 | 4.48E-03 | 0.0157 |
| BOLA3            | 2.57 | 1.58E-04 | 0.0027 |
| ASPHD2           | 2.57 | 9.16E-05 | 0.0022 |
| SEPT14P12        | 2.56 | 8.41E-03 | 0.0238 |
| DHCR7            | 2.56 | 1.91E-04 | 0.0029 |
| AC026403.1       | 2.56 | 3.52E-03 | 0.0134 |
| NOL3             | 2.56 | 1.23E-02 | 0.0310 |
| CHMP5            | 2.56 | 1.39E-04 | 0.0026 |
| WRAP53           | 2.56 | 2.10E-04 | 0.0030 |
| SRM              | 2.56 | 5.05E-04 | 0.0045 |
| ENST000002422572 | 2.56 | 1.28E-04 | 0.0025 |
| ETHE1            | 2.56 | 4.04E-04 | 0.0040 |
| POMP             | 2.55 | 6.22E-05 | 0.0018 |
| BEND5            | 2.55 | 2.24E-04 | 0.0031 |
| KCTD5            | 2.55 | 2.95E-05 | 0.0014 |
| HSD17B6          | 2.55 | 1.06E-02 | 0.0278 |
| SLC37A4          | 2.55 | 6.63E-05 | 0.0019 |
| RAD54B           | 2.54 | 2.82E-05 | 0.0014 |
| SURF4            | 2.54 | 3.62E-05 | 0.0015 |
| ENST000003237440 | 2.54 | 5.29E-04 | 0.0046 |
| POLA1            | 2.54 | 2.07E-04 | 0.0030 |
| TFRC             | 2.54 | 9.62E-04 | 0.0063 |
| LSM12P1          | 2.54 | 3.43E-03 | 0.0132 |
| BCKDK            | 2.54 | 6.94E-04 | 0.0053 |
| ENST000000031002 | 2.54 | 6.68E-05 | 0.0019 |
| DCLRE1A          | 2.54 | 1.35E-04 | 0.0025 |
| SNX8             | 2.53 | 1.17E-04 | 0.0024 |
| ENST000003546941 | 2.53 | 4.63E-04 | 0.0043 |
| SLC25A5          | 2.53 | 4.55E-05 | 0.0016 |
| PELO             | 2.53 | 6.76E-05 | 0.0019 |
| ENST000002707762 | 2.53 | 1.13E-04 | 0.0024 |
| CHTF18           | 2.53 | 1.12E-03 | 0.0068 |
| C16orf45         | 2.53 | 3.59E-03 | 0.0136 |
| GPSM2            | 2.53 | 1.46E-04 | 0.0026 |

|                  |      |          |        |
|------------------|------|----------|--------|
| PPIAP45          | 2.52 | 2.04E-02 | 0.0445 |
| EHD4             | 2.52 | 2.08E-04 | 0.0030 |
| AC008736.1       | 2.52 | 2.36E-03 | 0.0105 |
| ENST000003485020 | 2.52 | 4.34E-04 | 0.0042 |
| ZWILCH           | 2.52 | 9.39E-05 | 0.0022 |
| NUP37            | 2.51 | 4.99E-05 | 0.0017 |
| POLD3            | 2.51 | 3.83E-05 | 0.0015 |
| XRCC3            | 2.51 | 1.69E-04 | 0.0028 |
| PRMT5            | 2.51 | 7.64E-05 | 0.0020 |
| TP53I11          | 2.51 | 8.37E-04 | 0.0058 |
| PLAT             | 2.51 | 4.74E-04 | 0.0044 |
| CHAF1B           | 2.51 | 5.31E-05 | 0.0017 |
| SPRED1           | 2.51 | 3.85E-03 | 0.0142 |
| AIMP2            | 2.51 | 1.55E-04 | 0.0027 |
| WIP1             | 2.51 | 6.44E-05 | 0.0019 |
| ENST000002938312 | 2.50 | 9.19E-05 | 0.0022 |
| TMEM106C         | 2.50 | 1.67E-04 | 0.0028 |
| ABHD17C          | 2.50 | 1.49E-03 | 0.0081 |
| ENST000002304310 | 2.50 | 4.40E-04 | 0.0042 |
| EBP              | 2.50 | 3.98E-04 | 0.0040 |
| SCG5             | 2.50 | 4.18E-03 | 0.0150 |
| PPA1             | 2.50 | 2.22E-05 | 0.0012 |
| FAM207A          | 2.50 | 3.13E-03 | 0.0125 |
| ENST000002958302 | 2.50 | 7.88E-05 | 0.0020 |
| MSH5             | 2.50 | 4.70E-05 | 0.0016 |
| ENST000002961220 | 2.49 | 3.24E-05 | 0.0014 |
| CD70             | 2.49 | 7.58E-04 | 0.0055 |
| STX11            | 2.49 | 1.81E-04 | 0.0029 |
| HDGF             | 2.49 | 4.58E-05 | 0.0016 |
| PLSCR1           | 2.49 | 2.46E-04 | 0.0032 |
| ENST000001997062 | 2.49 | 1.25E-03 | 0.0073 |
| SLC25A19         | 2.49 | 1.91E-04 | 0.0029 |
| CDCA7L           | 2.49 | 3.29E-04 | 0.0037 |
| CCDC74A          | 2.49 | 1.09E-03 | 0.0068 |
| HMGB2            | 2.49 | 6.17E-05 | 0.0018 |
| CISD3            | 2.49 | 2.88E-04 | 0.0035 |
| AC130324.3       | 2.49 | 2.77E-03 | 0.0116 |
| ENST000002653040 | 2.49 | 1.30E-04 | 0.0025 |
| MCM3             | 2.49 | 8.74E-05 | 0.0021 |
| SNORA71C         | 2.48 | 2.34E-03 | 0.0105 |
| ZSWIM4           | 2.48 | 1.92E-03 | 0.0094 |
| CD80             | 2.48 | 1.96E-04 | 0.0030 |
| C9orf64          | 2.48 | 2.45E-04 | 0.0032 |
| ZGRF1            | 2.48 | 3.04E-05 | 0.0014 |
| SQOR             | 2.48 | 8.34E-05 | 0.0021 |
| ENST000002637950 | 2.48 | 3.74E-04 | 0.0039 |
| ELL2             | 2.48 | 1.19E-04 | 0.0024 |

|                  |      |          |        |
|------------------|------|----------|--------|
| USP18            | 2.48 | 4.09E-04 | 0.0041 |
| ZC3HAV1L         | 2.48 | 1.68E-04 | 0.0028 |
| AC002116.2       | 2.48 | 2.22E-03 | 0.0101 |
| AC083880.1       | 2.48 | 4.12E-03 | 0.0149 |
| ENST000003301883 | 2.48 | 8.13E-03 | 0.0233 |
| CD7              | 2.48 | 8.11E-04 | 0.0057 |
| ENST000002267250 | 2.48 | 3.93E-03 | 0.0144 |
| RRP9             | 2.48 | 1.11E-03 | 0.0068 |
| LRRC42           | 2.48 | 9.64E-05 | 0.0022 |
| CCT7             | 2.48 | 4.54E-05 | 0.0016 |
| RPP25            | 2.47 | 7.02E-03 | 0.0211 |
| MSH6             | 2.47 | 2.23E-05 | 0.0012 |
| PDIA5            | 2.47 | 1.65E-03 | 0.0086 |
| FANCB            | 2.47 | 4.91E-05 | 0.0017 |
| AC006449.6       | 2.47 | 2.31E-04 | 0.0032 |
| AC006449.9       | 2.47 | 2.31E-04 | 0.0032 |
| RSAD2            | 2.47 | 1.41E-03 | 0.0078 |
| DCUN1D5          | 2.47 | 7.25E-05 | 0.0020 |
| RRM1             | 2.47 | 5.85E-05 | 0.0018 |
| KDM4D            | 2.47 | 7.04E-04 | 0.0054 |
| MRPS18B          | 2.46 | 2.78E-05 | 0.0014 |
| PIM3             | 2.46 | 3.44E-05 | 0.0015 |
| TMEM99           | 2.46 | 1.06E-03 | 0.0067 |
| DEPDC4           | 2.46 | 5.83E-04 | 0.0048 |
| ENST000002653511 | 2.46 | 7.71E-05 | 0.0020 |
| PPIF             | 2.46 | 1.74E-04 | 0.0028 |
| REXO5            | 2.45 | 1.99E-02 | 0.0438 |
| TFDP1            | 2.45 | 1.15E-04 | 0.0024 |
| IARS             | 2.45 | 2.26E-05 | 0.0012 |
| ABCB6            | 2.45 | 4.08E-04 | 0.0041 |
| FDX2             | 2.45 | 2.20E-03 | 0.0101 |
| PFDN2            | 2.45 | 5.45E-05 | 0.0017 |
| SNRPE            | 2.45 | 9.31E-05 | 0.0022 |
| RAN              | 2.45 | 2.75E-04 | 0.0034 |
| AGFG1            | 2.44 | 4.03E-05 | 0.0016 |
| ENST000003142620 | 2.44 | 2.36E-04 | 0.0032 |
| FANCD2           | 2.44 | 4.16E-05 | 0.0016 |
| ENST000003238511 | 2.44 | 9.76E-03 | 0.0263 |
| POFUT1           | 2.44 | 4.08E-05 | 0.0016 |
| C8orf88          | 2.44 | 5.72E-03 | 0.0184 |
| ENST000003345271 | 2.44 | 1.86E-03 | 0.0092 |
| NFKBID           | 2.43 | 1.55E-04 | 0.0027 |
| RAI14            | 2.43 | 5.07E-03 | 0.0170 |
| LRRC34           | 2.43 | 3.03E-04 | 0.0036 |
| ENST000002611911 | 2.43 | 3.13E-05 | 0.0014 |
| HIST1H2BG        | 2.43 | 9.11E-05 | 0.0022 |
| NHP2             | 2.43 | 7.48E-05 | 0.0020 |

|                  |      |          |        |
|------------------|------|----------|--------|
| SIPA1L2          | 2.43 | 1.74E-03 | 0.0088 |
| CCT6A            | 2.43 | 3.27E-04 | 0.0037 |
| ENST000002643352 | 2.43 | 1.87E-04 | 0.0029 |
| ENST000003165190 | 2.43 | 1.05E-03 | 0.0066 |
| DUSP14           | 2.42 | 2.06E-04 | 0.0030 |
| FAM234B          | 2.42 | 1.03E-03 | 0.0066 |
| RAC3             | 2.42 | 1.34E-03 | 0.0076 |
| SEPT8            | 2.42 | 4.67E-04 | 0.0043 |
| GBE1             | 2.42 | 3.80E-05 | 0.0015 |
| SPESP1           | 2.42 | 1.70E-02 | 0.0391 |
| TPRG1            | 2.42 | 7.11E-03 | 0.0213 |
| PAOX             | 2.42 | 1.10E-02 | 0.0286 |
| RPF2             | 2.42 | 1.12E-04 | 0.0024 |
| MAPKAPK3         | 2.42 | 3.36E-05 | 0.0015 |
| DNAJC18          | 2.42 | 1.51E-04 | 0.0026 |
| ENST000003238332 | 2.42 | 8.25E-04 | 0.0058 |
| AC064850.1       | 2.41 | 2.45E-03 | 0.0108 |
| COA6             | 2.41 | 1.39E-04 | 0.0026 |
| PRG2             | 2.41 | 2.31E-03 | 0.0104 |
| NSD2             | 2.41 | 2.36E-05 | 0.0012 |
| LINC01355        | 2.41 | 1.18E-03 | 0.0071 |
| NLN              | 2.41 | 7.00E-05 | 0.0019 |
| SAP30            | 2.41 | 8.03E-05 | 0.0020 |
| MRPS23           | 2.41 | 4.34E-04 | 0.0042 |
| ZNF775           | 2.41 | 2.94E-04 | 0.0035 |
| ETS2             | 2.41 | 6.00E-04 | 0.0049 |
| CPXM1            | 2.41 | 1.98E-02 | 0.0435 |
| ENST000002167740 | 2.41 | 3.73E-05 | 0.0015 |
| MFAP1            | 2.41 | 6.19E-05 | 0.0018 |
| ETV4             | 2.40 | 6.65E-03 | 0.0204 |
| SYP              | 2.40 | 4.53E-04 | 0.0043 |
| PPFIA3           | 2.40 | 5.47E-04 | 0.0046 |
| TYMP             | 2.40 | 1.36E-03 | 0.0076 |
| ENST000003011593 | 2.40 | 1.89E-02 | 0.0422 |
| C11orf24         | 2.40 | 4.75E-04 | 0.0044 |
| ENST000003177451 | 2.40 | 2.83E-03 | 0.0117 |
| KDELC1           | 2.39 | 2.14E-04 | 0.0031 |
| C19orf48         | 2.39 | 1.44E-04 | 0.0026 |
| NDUFAB1          | 2.39 | 6.38E-05 | 0.0019 |
| ACAT2            | 2.39 | 1.51E-04 | 0.0026 |
| NR4A1            | 2.39 | 5.44E-03 | 0.0178 |
| NASP             | 2.39 | 4.25E-05 | 0.0016 |
| IFRD2            | 2.39 | 7.10E-04 | 0.0054 |
| NFE2L1           | 2.39 | 2.69E-05 | 0.0013 |
| ENST000002760792 | 2.39 | 4.46E-04 | 0.0042 |
| ADAM9            | 2.39 | 5.65E-05 | 0.0017 |
| PGK1             | 2.39 | 1.61E-05 | 0.0011 |

|                  |      |          |        |
|------------------|------|----------|--------|
| ENST000003383820 | 2.38 | 5.37E-05 | 0.0017 |
| CD83             | 2.38 | 5.48E-05 | 0.0017 |
| AL035681.1       | 2.38 | 2.48E-03 | 0.0109 |
| MRPL13           | 2.38 | 5.97E-05 | 0.0018 |
| ENST000003612190 | 2.38 | 1.81E-04 | 0.0029 |
| PRDX4            | 2.38 | 1.34E-04 | 0.0025 |
| PSMG1            | 2.38 | 1.08E-04 | 0.0023 |
| CCDC113          | 2.38 | 3.57E-04 | 0.0038 |
| CCT8             | 2.38 | 2.14E-05 | 0.0012 |
| CHCHD4           | 2.38 | 3.79E-04 | 0.0039 |
| METTL1           | 2.38 | 2.51E-03 | 0.0110 |
| DPP3             | 2.38 | 1.39E-04 | 0.0026 |
| YWHAG            | 2.38 | 6.91E-05 | 0.0019 |
| FANCL            | 2.37 | 3.40E-04 | 0.0037 |
| PNPO             | 2.37 | 3.09E-04 | 0.0036 |
| ENST000002498060 | 2.37 | 5.43E-03 | 0.0178 |
| CENPL            | 2.37 | 4.28E-04 | 0.0041 |
| ADPRH            | 2.37 | 3.02E-04 | 0.0035 |
| CCDC189          | 2.37 | 2.72E-03 | 0.0115 |
| TMPO-AS1         | 2.37 | 3.45E-04 | 0.0038 |
| WDR63            | 2.36 | 2.99E-03 | 0.0121 |
| CLUH             | 2.36 | 3.06E-04 | 0.0036 |
| FARSA            | 2.36 | 1.15E-04 | 0.0024 |
| TEAD1            | 2.36 | 1.32E-02 | 0.0327 |
| ENKD1            | 2.36 | 3.73E-03 | 0.0140 |
| C1orf112         | 2.36 | 6.77E-05 | 0.0019 |
| ENST000002530990 | 2.36 | 9.13E-04 | 0.0061 |
| ENST000002831794 | 2.36 | 1.33E-04 | 0.0025 |
| SNRPG            | 2.36 | 1.93E-04 | 0.0029 |
| HTATSF1P2        | 2.35 | 1.03E-02 | 0.0273 |
| MASTL            | 2.35 | 3.44E-04 | 0.0038 |
| LAGE3            | 2.35 | 3.32E-04 | 0.0037 |
| SLC35F2          | 2.35 | 8.30E-05 | 0.0021 |
| ENST000002712770 | 2.35 | 1.90E-04 | 0.0029 |
| ENST000002161941 | 2.35 | 7.83E-05 | 0.0020 |
| TCP1             | 2.35 | 1.61E-04 | 0.0027 |
| MIR3142HG        | 2.35 | 4.97E-03 | 0.0168 |
| PUS7             | 2.35 | 1.47E-04 | 0.0026 |
| ENST000002996130 | 2.35 | 5.21E-04 | 0.0045 |
| PSMD14           | 2.35 | 1.95E-04 | 0.0030 |
| FDXR             | 2.35 | 8.15E-04 | 0.0057 |
| PDAP1            | 2.35 | 1.20E-04 | 0.0024 |
| COX17            | 2.34 | 4.40E-05 | 0.0016 |
| CETN3            | 2.34 | 2.55E-04 | 0.0033 |
| SNX10            | 2.34 | 8.44E-05 | 0.0021 |
| CEP152           | 2.34 | 5.97E-05 | 0.0018 |
| HIST2H2BE        | 2.34 | 3.38E-05 | 0.0015 |

|                  |      |          |        |
|------------------|------|----------|--------|
| MZT1             | 2.34 | 4.32E-05 | 0.0016 |
| ENST000003573240 | 2.34 | 3.64E-03 | 0.0137 |
| PPP2R5D          | 2.34 | 2.61E-03 | 0.0112 |
| ENST000002167560 | 2.34 | 1.21E-04 | 0.0024 |
| C18orf54         | 2.34 | 6.22E-04 | 0.0050 |
| RAC2             | 2.34 | 3.29E-04 | 0.0037 |
| TOM1L1           | 2.34 | 1.27E-02 | 0.0317 |
| MXD3             | 2.33 | 2.61E-03 | 0.0112 |
| AL138759.1       | 2.33 | 5.47E-03 | 0.0179 |
| PC               | 2.33 | 3.60E-04 | 0.0038 |
| PLAGL1           | 2.33 | 1.54E-02 | 0.0365 |
| FH               | 2.33 | 1.01E-04 | 0.0022 |
| PSMB3            | 2.33 | 2.09E-04 | 0.0030 |
| ENST000002760960 | 2.33 | 1.21E-04 | 0.0024 |
| BOP1             | 2.33 | 2.24E-03 | 0.0102 |
| PEA15            | 2.33 | 5.41E-04 | 0.0046 |
| CCT4             | 2.33 | 4.00E-05 | 0.0016 |
| CYSTM1           | 2.32 | 3.11E-04 | 0.0036 |
| EEF1E1           | 2.32 | 1.39E-04 | 0.0026 |
| IFNLR1           | 2.32 | 3.89E-03 | 0.0143 |
| C20orf27         | 2.32 | 5.52E-03 | 0.0180 |
| RFWD3            | 2.32 | 3.16E-05 | 0.0014 |
| ENST000002162812 | 2.32 | 1.66E-04 | 0.0028 |
| PFDN6            | 2.32 | 1.46E-04 | 0.0026 |
| ENST000003316660 | 2.32 | 2.28E-03 | 0.0103 |
| C11orf98         | 2.31 | 1.29E-04 | 0.0025 |
| MSH5-SAPCD1      | 2.31 | 1.10E-03 | 0.0068 |
| SUV39H1          | 2.31 | 4.07E-04 | 0.0041 |
| HIRIP3           | 2.31 | 8.79E-05 | 0.0021 |
| KNTC1            | 2.31 | 1.33E-04 | 0.0025 |
| BCL2L14          | 2.31 | 4.30E-04 | 0.0041 |
| AC069499.1       | 2.31 | 5.57E-03 | 0.0181 |
| NDUFA8           | 2.31 | 9.80E-05 | 0.0022 |
| CCNB1IP1         | 2.30 | 4.83E-05 | 0.0016 |
| GNG5             | 2.30 | 1.16E-04 | 0.0024 |
| RHOC             | 2.30 | 1.49E-04 | 0.0026 |
| CD274            | 2.30 | 1.19E-04 | 0.0024 |
| AC118553.1       | 2.30 | 9.09E-03 | 0.0251 |
| ENST000003595271 | 2.30 | 3.90E-03 | 0.0143 |
| HSPA4            | 2.30 | 1.22E-04 | 0.0025 |
| NACC1            | 2.30 | 1.96E-04 | 0.0030 |
| TMEM273          | 2.30 | 5.57E-05 | 0.0017 |
| ARMCX1           | 2.29 | 3.46E-04 | 0.0038 |
| NUP62            | 2.29 | 5.30E-05 | 0.0017 |
| MRPL39           | 2.29 | 9.15E-05 | 0.0022 |
| ENST000002818710 | 2.29 | 1.83E-03 | 0.0091 |
| ENST000002687971 | 2.29 | 2.64E-04 | 0.0034 |

|                  |      |          |        |
|------------------|------|----------|--------|
| TTI2             | 2.29 | 1.21E-04 | 0.0024 |
| LAPTM4B          | 2.29 | 8.21E-04 | 0.0058 |
| NUDCD1           | 2.29 | 1.69E-04 | 0.0028 |
| TIMM10           | 2.29 | 3.69E-04 | 0.0039 |
| CXCR5            | 2.29 | 2.56E-04 | 0.0033 |
| LDHAP4           | 2.29 | 1.41E-02 | 0.0342 |
| MARS             | 2.29 | 5.00E-05 | 0.0017 |
| CDC42BPA         | 2.29 | 9.90E-04 | 0.0064 |
| ITPRIPL2         | 2.28 | 1.52E-04 | 0.0027 |
| NFKBIE           | 2.28 | 2.63E-04 | 0.0033 |
| KLHL23           | 2.28 | 2.76E-04 | 0.0034 |
| SHMT1            | 2.28 | 7.30E-05 | 0.0020 |
| MSRB1            | 2.28 | 4.31E-04 | 0.0041 |
| RUSC2            | 2.28 | 2.13E-03 | 0.0099 |
| MIR663B          | 2.28 | 2.68E-03 | 0.0114 |
| ENST00000621148  | 2.28 | 1.02E-03 | 0.0065 |
| IL23A            | 2.28 | 7.64E-05 | 0.0020 |
| HOMER1           | 2.28 | 3.61E-03 | 0.0137 |
| GEN1             | 2.28 | 4.48E-05 | 0.0016 |
| ENST000003305031 | 2.28 | 1.30E-04 | 0.0025 |
| DBI              | 2.27 | 4.77E-04 | 0.0044 |
| AK2              | 2.27 | 3.03E-05 | 0.0014 |
| ENST000003237010 | 2.27 | 3.60E-03 | 0.0136 |
| CD151            | 2.27 | 3.17E-04 | 0.0037 |
| C4orf46          | 2.27 | 9.04E-05 | 0.0022 |
| IDH1             | 2.27 | 2.34E-04 | 0.0032 |
| ENST000002782243 | 2.27 | 6.01E-04 | 0.0049 |
| VMP1             | 2.27 | 7.94E-05 | 0.0020 |
| LDLR             | 2.27 | 1.26E-03 | 0.0073 |
| TIFA             | 2.27 | 4.00E-04 | 0.0040 |
| SEMA3A           | 2.26 | 1.20E-02 | 0.0305 |
| SH2D3C           | 2.26 | 1.47E-02 | 0.0352 |
| ENST000002678143 | 2.26 | 1.86E-03 | 0.0092 |
| PSMA3            | 2.26 | 5.50E-05 | 0.0017 |
| ENST000003262662 | 2.26 | 2.60E-04 | 0.0033 |
| OTUD7B           | 2.26 | 9.74E-05 | 0.0022 |
| RGS3             | 2.26 | 1.83E-04 | 0.0029 |
| ENST000002982922 | 2.26 | 4.47E-04 | 0.0042 |
| PARP2            | 2.26 | 3.60E-04 | 0.0038 |
| MANF             | 2.25 | 9.72E-05 | 0.0022 |
| ENST000002455390 | 2.25 | 9.13E-05 | 0.0022 |
| ENST000003055600 | 2.25 | 3.15E-04 | 0.0036 |
| COMTD1           | 2.25 | 6.14E-04 | 0.0050 |
| ENST000003042710 | 2.25 | 6.18E-04 | 0.0050 |
| SMIM3            | 2.25 | 1.34E-03 | 0.0076 |
| C21orf58         | 2.25 | 4.64E-04 | 0.0043 |
| ARPC5L           | 2.25 | 7.23E-05 | 0.0020 |



|                  |      |          |        |
|------------------|------|----------|--------|
| ZNF668           | 2.25 | 1.76E-02 | 0.0400 |
| NOP10            | 2.25 | 1.39E-04 | 0.0026 |
| PDP2             | 2.25 | 2.37E-04 | 0.0032 |
| BANF1            | 2.25 | 2.97E-03 | 0.0121 |
| ISOC2            | 2.25 | 2.49E-03 | 0.0109 |
| TNIP3            | 2.24 | 7.55E-03 | 0.0222 |
| GEMIN7           | 2.24 | 7.47E-04 | 0.0055 |
| TIAM2            | 2.24 | 1.91E-03 | 0.0093 |
| CLDN12           | 2.24 | 4.62E-04 | 0.0043 |
| ANAPC11          | 2.24 | 3.43E-04 | 0.0038 |
| EPDR1            | 2.24 | 1.06E-02 | 0.0280 |
| MPZ              | 2.24 | 1.97E-03 | 0.0095 |
| PLOD1            | 2.24 | 1.93E-03 | 0.0094 |
| ENST000002994383 | 2.24 | 4.86E-03 | 0.0166 |
| FAM162A          | 2.24 | 1.39E-04 | 0.0026 |
| SLC26A6          | 2.24 | 1.68E-03 | 0.0086 |
| BCL2A1           | 2.24 | 6.03E-05 | 0.0018 |
| ENST000002623750 | 2.24 | 3.71E-04 | 0.0039 |
| FGF14-AS2        | 2.24 | 1.78E-02 | 0.0403 |
| CCT3             | 2.23 | 2.19E-04 | 0.0031 |
| TRIP6            | 2.23 | 2.77E-04 | 0.0034 |
| COX5A            | 2.23 | 2.46E-04 | 0.0032 |
| RAB19            | 2.23 | 1.94E-03 | 0.0094 |
| STARD4           | 2.23 | 1.16E-03 | 0.0070 |
| YIF1A            | 2.23 | 3.49E-04 | 0.0038 |
| KIF3B            | 2.23 | 8.06E-05 | 0.0020 |
| ENST000002606052 | 2.23 | 9.02E-04 | 0.0061 |
| DDX39A           | 2.23 | 4.70E-04 | 0.0044 |
| GOT2             | 2.22 | 9.72E-05 | 0.0022 |
| ENST000002531071 | 2.22 | 5.68E-03 | 0.0184 |
| LMAN1            | 2.22 | 4.02E-05 | 0.0016 |
| FUOM             | 2.22 | 6.06E-04 | 0.0049 |
| RNU1-13P         | 2.22 | 2.15E-02 | 0.0463 |
| ENST000003270350 | 2.21 | 4.33E-04 | 0.0042 |
| ENST000003299082 | 2.21 | 2.88E-04 | 0.0035 |
| ENST000003121890 | 2.21 | 6.11E-03 | 0.0192 |
| HINT2            | 2.21 | 6.11E-04 | 0.0050 |
| VLDLR-AS1        | 2.21 | 2.76E-03 | 0.0116 |
| PXMP2            | 2.21 | 7.75E-04 | 0.0056 |
| NAPSB            | 2.21 | 1.26E-03 | 0.0073 |
| CHCHD2           | 2.21 | 4.13E-05 | 0.0016 |
| PIMREG           | 2.21 | 9.71E-03 | 0.0262 |
| SNHG3            | 2.21 | 2.16E-04 | 0.0031 |
| SASS6            | 2.21 | 8.56E-05 | 0.0021 |
| ENST000002959081 | 2.20 | 4.57E-04 | 0.0043 |
| FADD             | 2.20 | 1.72E-04 | 0.0028 |
| ENST000003307522 | 2.20 | 1.40E-04 | 0.0026 |

|                  |      |          |        |
|------------------|------|----------|--------|
| TLN2             | 2.20 | 3.28E-04 | 0.0037 |
| TIMM13           | 2.20 | 3.91E-04 | 0.0040 |
| S100A11          | 2.20 | 5.07E-04 | 0.0045 |
| ENST000002447761 | 2.20 | 6.28E-04 | 0.0050 |
| ENST000003086960 | 2.20 | 7.88E-04 | 0.0056 |
| BRSK1            | 2.20 | 5.47E-03 | 0.0179 |
| AC006538.2       | 2.20 | 7.12E-03 | 0.0213 |
| GADD45GIP1       | 2.20 | 1.97E-04 | 0.0030 |
| ITPKC            | 2.20 | 2.28E-04 | 0.0032 |
| CYFIP1           | 2.20 | 2.54E-04 | 0.0033 |
| NDC1             | 2.20 | 8.49E-05 | 0.0021 |
| TTYH3            | 2.20 | 2.94E-03 | 0.0120 |
| EEF1AKNMT        | 2.19 | 7.39E-05 | 0.0020 |
| MIR663AHG        | 2.19 | 8.30E-04 | 0.0058 |
| ETFB             | 2.19 | 5.53E-05 | 0.0017 |
| C17orf51         | 2.19 | 1.40E-04 | 0.0026 |
| RNVU1-7          | 2.19 | 1.18E-02 | 0.0300 |
| PRKAR1B          | 2.19 | 1.28E-04 | 0.0025 |
| MDH2             | 2.19 | 4.39E-04 | 0.0042 |
| BORA             | 2.19 | 6.33E-05 | 0.0019 |
| POLR1A           | 2.19 | 7.33E-04 | 0.0055 |
| APOBEC3H         | 2.19 | 1.50E-03 | 0.0081 |
| COL5A2           | 2.19 | 2.02E-02 | 0.0442 |
| LINC00888        | 2.19 | 1.42E-02 | 0.0343 |
| E2F2             | 2.19 | 3.26E-04 | 0.0037 |
| CPSF3            | 2.18 | 1.92E-04 | 0.0029 |
| AIFM2            | 2.18 | 1.09E-03 | 0.0068 |
| PARK7            | 2.18 | 1.46E-04 | 0.0026 |
| POP1             | 2.18 | 8.52E-04 | 0.0059 |
| CDK4             | 2.18 | 2.88E-04 | 0.0035 |
| ANP32E           | 2.18 | 2.19E-04 | 0.0031 |
| MAP2K3           | 2.18 | 3.86E-04 | 0.0040 |
| EIF3CL           | 2.18 | 2.81E-03 | 0.0117 |
| YARS             | 2.18 | 4.79E-04 | 0.0044 |
| B4GALNT3         | 2.18 | 1.73E-02 | 0.0395 |
| BZW2             | 2.18 | 2.06E-04 | 0.0030 |
| ENST000003090611 | 2.18 | 6.45E-04 | 0.0051 |
| AHSA1            | 2.18 | 2.61E-04 | 0.0033 |
| PSMC3            | 2.18 | 3.59E-04 | 0.0038 |
| CD9              | 2.18 | 9.28E-03 | 0.0255 |
| PTPN6            | 2.18 | 3.91E-04 | 0.0040 |
| ENST000003549400 | 2.18 | 9.72E-03 | 0.0263 |
| FAM216A          | 2.18 | 1.30E-04 | 0.0025 |
| ENST000003302870 | 2.18 | 8.15E-04 | 0.0057 |
| TOMM40           | 2.18 | 1.12E-03 | 0.0068 |
| IGFBP4           | 2.18 | 4.41E-04 | 0.0042 |
| SLAMF1           | 2.17 | 1.36E-04 | 0.0025 |

|                  |      |          |        |
|------------------|------|----------|--------|
| LRRC3            | 2.17 | 8.21E-03 | 0.0234 |
| CU634019.6       | 2.17 | 1.86E-02 | 0.0418 |
| AC099343.2       | 2.17 | 4.30E-03 | 0.0153 |
| ENST000002991734 | 2.17 | 7.53E-03 | 0.0221 |
| F5               | 2.17 | 1.90E-04 | 0.0029 |
| RASAL1           | 2.17 | 1.16E-02 | 0.0298 |
| TDRKH            | 2.17 | 1.89E-03 | 0.0092 |
| NCAPD3           | 2.17 | 8.84E-05 | 0.0021 |
| PSMA6            | 2.17 | 9.62E-05 | 0.0022 |
| KHSRP            | 2.17 | 1.78E-04 | 0.0028 |
| PTGIR            | 2.17 | 2.80E-03 | 0.0116 |
| CARM1            | 2.17 | 1.40E-04 | 0.0026 |
| SLC25A15         | 2.17 | 2.46E-04 | 0.0032 |
| RRP1             | 2.17 | 4.71E-04 | 0.0044 |
| PRPS2            | 2.17 | 8.44E-05 | 0.0021 |
| PARS2            | 2.16 | 7.87E-03 | 0.0228 |
| ENST000002261050 | 2.16 | 2.29E-03 | 0.0103 |
| AC004943.2       | 2.16 | 1.10E-03 | 0.0068 |
| NDUFAF1          | 2.16 | 5.40E-04 | 0.0046 |
| IFI6             | 2.16 | 3.57E-03 | 0.0136 |
| SPIRE1           | 2.16 | 1.54E-03 | 0.0082 |
| AHRR             | 2.16 | 9.79E-03 | 0.0264 |
| MGST2            | 2.16 | 2.09E-02 | 0.0453 |
| CKAP5            | 2.16 | 3.55E-05 | 0.0015 |
| PPP5C            | 2.16 | 2.25E-04 | 0.0031 |
| AP1S1            | 2.16 | 1.38E-04 | 0.0026 |
| BRI3BP           | 2.16 | 1.03E-04 | 0.0023 |
| CD72             | 2.16 | 5.06E-03 | 0.0170 |
| ENST000003089821 | 2.16 | 1.77E-03 | 0.0089 |
| ENST000003228970 | 2.16 | 7.33E-04 | 0.0055 |
| PPAT             | 2.16 | 1.08E-04 | 0.0023 |
| LACTB2           | 2.16 | 3.67E-04 | 0.0039 |
| PSMB6            | 2.16 | 3.51E-04 | 0.0038 |
| GCHFR            | 2.16 | 4.78E-04 | 0.0044 |
| AL591379.1       | 2.15 | 1.08E-03 | 0.0067 |
| NUTF2            | 2.15 | 1.46E-04 | 0.0026 |
| ABHD10           | 2.15 | 1.44E-04 | 0.0026 |
| TALDO1           | 2.15 | 1.05E-04 | 0.0023 |
| PSMD3            | 2.15 | 3.11E-04 | 0.0036 |
| XPOT             | 2.15 | 3.90E-05 | 0.0016 |
| AL441992.1       | 2.15 | 2.68E-04 | 0.0034 |
| NSDHL            | 2.15 | 2.99E-04 | 0.0035 |
| TIMM8A           | 2.15 | 2.69E-04 | 0.0034 |
| GSTZ1            | 2.15 | 4.19E-04 | 0.0041 |
| NINJ1            | 2.15 | 8.41E-04 | 0.0058 |
| ENST000003315521 | 2.15 | 1.22E-03 | 0.0072 |
| ARL3             | 2.15 | 1.70E-04 | 0.0028 |

|                  |      |          |        |
|------------------|------|----------|--------|
| IPO5             | 2.15 | 3.45E-05 | 0.0015 |
| ENST000003243403 | 2.15 | 6.04E-04 | 0.0049 |
| BHLHE40          | 2.15 | 8.72E-04 | 0.0060 |
| FIBP             | 2.14 | 2.62E-04 | 0.0033 |
| YWHAQ            | 2.14 | 1.35E-04 | 0.0025 |
| RUVBL1           | 2.14 | 3.36E-04 | 0.0037 |
| CENPJ            | 2.14 | 9.79E-05 | 0.0022 |
| ZC3H12C          | 2.14 | 5.04E-03 | 0.0169 |
| COX6A1           | 2.14 | 1.18E-04 | 0.0024 |
| C2CD4A           | 2.14 | 5.36E-03 | 0.0176 |
| PSMD8            | 2.14 | 2.53E-04 | 0.0033 |
| ENST000002336300 | 2.14 | 1.09E-02 | 0.0285 |
| GRAMD4           | 2.14 | 2.69E-04 | 0.0034 |
| ENST000003105640 | 2.14 | 3.38E-03 | 0.0131 |
| UQCRC1           | 2.14 | 5.19E-05 | 0.0017 |
| WSB2             | 2.14 | 3.86E-04 | 0.0040 |
| UQCRCQ           | 2.14 | 2.99E-04 | 0.0035 |
| MFSD10           | 2.14 | 1.09E-04 | 0.0023 |
| NTHL1            | 2.14 | 5.99E-04 | 0.0049 |
| NAGS             | 2.14 | 8.00E-03 | 0.0231 |
| NDUFA7           | 2.13 | 1.09E-04 | 0.0023 |
| ENST000003588960 | 2.13 | 3.31E-04 | 0.0037 |
| BOLA2B           | 2.13 | 4.03E-03 | 0.0146 |
| MIR621           | 2.13 | 1.58E-03 | 0.0083 |
| ID3              | 2.13 | 8.54E-04 | 0.0059 |
| ENST000003261810 | 2.13 | 2.23E-04 | 0.0031 |
| H1FO             | 2.13 | 5.61E-04 | 0.0047 |
| PRDX5            | 2.13 | 3.20E-04 | 0.0037 |
| MRPL11           | 2.13 | 7.13E-04 | 0.0054 |
| TRMT5            | 2.13 | 1.76E-04 | 0.0028 |
| SNRPA            | 2.13 | 4.58E-04 | 0.0043 |
| TREML2           | 2.13 | 2.64E-03 | 0.0113 |
| GCK              | 2.13 | 9.93E-03 | 0.0266 |
| UGDH             | 2.13 | 1.03E-03 | 0.0066 |
| ENST000002967010 | 2.13 | 2.64E-04 | 0.0034 |
| POLR2H           | 2.12 | 3.50E-04 | 0.0038 |
| MVK              | 2.12 | 3.00E-04 | 0.0035 |
| PNMA2            | 2.12 | 5.99E-03 | 0.0190 |
| TUFM             | 2.12 | 7.53E-05 | 0.0020 |
| AL445231.1       | 2.12 | 1.02E-02 | 0.0271 |
| GPX1             | 2.12 | 1.15E-04 | 0.0024 |
| EXOSC5           | 2.12 | 6.14E-04 | 0.0050 |
| DSN1             | 2.12 | 1.06E-04 | 0.0023 |
| C2CD4D-AS1       | 2.12 | 1.29E-03 | 0.0074 |
| CNTROB           | 2.12 | 8.02E-05 | 0.0020 |
| PFKP             | 2.12 | 4.16E-04 | 0.0041 |
| TIMM44           | 2.12 | 8.78E-05 | 0.0021 |

|                  |      |          |        |
|------------------|------|----------|--------|
| ARL2             | 2.12 | 6.10E-04 | 0.0050 |
| ATP5MC1          | 2.12 | 2.84E-04 | 0.0035 |
| PTPN7            | 2.12 | 1.74E-04 | 0.0028 |
| CLPP             | 2.11 | 2.38E-04 | 0.0032 |
| ZNF90            | 2.11 | 1.61E-04 | 0.0027 |
| PRPF4            | 2.11 | 9.98E-05 | 0.0022 |
| ALDOC            | 2.11 | 2.82E-03 | 0.0117 |
| NUDC             | 2.11 | 4.06E-04 | 0.0040 |
| FAM210A          | 2.11 | 1.11E-04 | 0.0023 |
| ENST000002539251 | 2.11 | 1.81E-03 | 0.0090 |
| ENST000002702251 | 2.11 | 2.44E-04 | 0.0032 |
| NANP             | 2.11 | 5.34E-04 | 0.0046 |
| NUP58            | 2.11 | 5.79E-05 | 0.0018 |
| CD63             | 2.11 | 3.28E-04 | 0.0037 |
| ACOX3            | 2.11 | 4.15E-04 | 0.0041 |
| AC009779.2       | 2.11 | 8.30E-03 | 0.0236 |
| SCO2             | 2.11 | 1.82E-03 | 0.0090 |
| RNASEH1-AS1      | 2.11 | 1.95E-04 | 0.0030 |
| LRRCC1           | 2.10 | 1.56E-03 | 0.0083 |
| GPR180           | 2.10 | 5.82E-04 | 0.0048 |
| FAM89A           | 2.10 | 2.19E-04 | 0.0031 |
| ADRM1            | 2.10 | 5.01E-04 | 0.0045 |
| UBE2M            | 2.10 | 1.09E-04 | 0.0023 |
| ENST000002642743 | 2.10 | 2.12E-03 | 0.0099 |
| FLOT1            | 2.10 | 3.26E-04 | 0.0037 |
| ENST000003318890 | 2.10 | 3.31E-03 | 0.0129 |
| DOHH             | 2.10 | 9.75E-04 | 0.0064 |
| PPAN             | 2.10 | 2.08E-03 | 0.0097 |
| ENST000002247562 | 2.09 | 7.83E-04 | 0.0056 |
| PSMA2            | 2.09 | 1.31E-04 | 0.0025 |
| AL021068.1       | 2.09 | 3.75E-03 | 0.0140 |
| FBXO6            | 2.09 | 1.94E-03 | 0.0094 |
| ENST000003048003 | 2.09 | 6.95E-04 | 0.0053 |
| ARHGAP19         | 2.09 | 6.99E-05 | 0.0019 |
| EXOSC8           | 2.09 | 5.81E-05 | 0.0018 |
| TKT              | 2.09 | 1.91E-04 | 0.0029 |
| CMTM4            | 2.09 | 1.14E-03 | 0.0069 |
| ZFP92            | 2.09 | 5.97E-03 | 0.0190 |
| ENST000003213581 | 2.09 | 8.75E-05 | 0.0021 |
| BCYRN1           | 2.08 | 2.48E-04 | 0.0032 |
| NOLC1            | 2.08 | 7.75E-04 | 0.0056 |
| VAV2             | 2.08 | 1.28E-02 | 0.0319 |
| CMAHP            | 2.08 | 8.84E-05 | 0.0021 |
| ENST000002998215 | 2.08 | 9.91E-03 | 0.0266 |
| NOB1             | 2.08 | 1.29E-04 | 0.0025 |
| IMPA2            | 2.08 | 6.77E-04 | 0.0052 |
| NR4A3            | 2.08 | 1.17E-02 | 0.0298 |

|                  |      |          |        |
|------------------|------|----------|--------|
| NTRK1            | 2.08 | 2.37E-02 | 0.0496 |
| PSMB5            | 2.08 | 2.01E-04 | 0.0030 |
| SLC19A1          | 2.08 | 2.08E-03 | 0.0098 |
| CCDC85B          | 2.08 | 3.05E-03 | 0.0123 |
| RCC2             | 2.08 | 6.93E-05 | 0.0019 |
| FBXL19           | 2.08 | 2.35E-04 | 0.0032 |
| IFI27L1          | 2.08 | 3.07E-04 | 0.0036 |
| CD3EAP           | 2.08 | 1.74E-03 | 0.0088 |
| RCN1             | 2.08 | 8.36E-04 | 0.0058 |
| GNPNAT1          | 2.08 | 4.56E-04 | 0.0043 |
| HK1              | 2.07 | 2.63E-04 | 0.0033 |
| ENST000002649320 | 2.07 | 1.76E-04 | 0.0028 |
| CENPV            | 2.07 | 1.67E-04 | 0.0028 |
| LUCAT1           | 2.07 | 6.26E-04 | 0.0050 |
| MRPS34           | 2.07 | 1.01E-04 | 0.0022 |
| CTU2             | 2.07 | 7.17E-04 | 0.0054 |
| HPRT1            | 2.07 | 1.51E-04 | 0.0026 |
| TTC9C            | 2.07 | 1.58E-04 | 0.0027 |
| TPM4             | 2.07 | 4.74E-05 | 0.0016 |
| SYTL3            | 2.07 | 4.72E-03 | 0.0162 |
| TAX1BP3          | 2.06 | 6.50E-04 | 0.0051 |
| UBL4A            | 2.06 | 1.52E-04 | 0.0026 |
| ENST000002587871 | 2.06 | 6.55E-04 | 0.0051 |
| INSIG1           | 2.06 | 5.74E-05 | 0.0017 |
| ENST000003519860 | 2.06 | 2.59E-04 | 0.0033 |
| ENST000003340820 | 2.06 | 4.22E-04 | 0.0041 |
| JPT1             | 2.06 | 2.56E-04 | 0.0033 |
| SLC31A1          | 2.05 | 6.38E-04 | 0.0051 |
| GSTCD            | 2.05 | 2.12E-03 | 0.0099 |
| CLPB             | 2.05 | 2.95E-04 | 0.0035 |
| NDUFV2P1         | 2.05 | 7.00E-03 | 0.0211 |
| LYSMD1           | 2.05 | 7.32E-04 | 0.0055 |
| CIAO2B           | 2.05 | 8.07E-05 | 0.0020 |
| HMGB1P6          | 2.05 | 1.97E-03 | 0.0095 |
| LRRC59           | 2.05 | 1.61E-04 | 0.0027 |
| PUS3             | 2.05 | 1.43E-04 | 0.0026 |
| EIF3I            | 2.05 | 1.41E-04 | 0.0026 |
| CYTOR            | 2.05 | 1.12E-03 | 0.0068 |
| PGM2             | 2.05 | 1.02E-04 | 0.0022 |
| HSPH1            | 2.05 | 6.01E-04 | 0.0049 |
| OSBPL6           | 2.05 | 7.04E-03 | 0.0212 |
| ZDHHC12          | 2.05 | 5.03E-04 | 0.0045 |
| RHPN2            | 2.05 | 2.56E-03 | 0.0111 |
| NDUFB6           | 2.05 | 7.32E-04 | 0.0055 |
| LRP11            | 2.04 | 2.47E-04 | 0.0032 |
| ENST000003260190 | 2.04 | 3.11E-03 | 0.0124 |
| ENST000002160992 | 2.04 | 5.04E-04 | 0.0045 |

|                  |      |          |        |
|------------------|------|----------|--------|
| FAM83D           | 2.04 | 1.18E-03 | 0.0071 |
| PEMT             | 2.04 | 1.11E-03 | 0.0068 |
| SNRPB            | 2.04 | 1.18E-04 | 0.0024 |
| AKIP1            | 2.04 | 1.40E-03 | 0.0078 |
| MTCH2            | 2.04 | 6.08E-04 | 0.0049 |
| CISD1            | 2.04 | 4.19E-04 | 0.0041 |
| ENST000003181580 | 2.04 | 1.02E-03 | 0.0065 |
| ENST000003600010 | 2.04 | 3.66E-04 | 0.0039 |
| WDR12            | 2.04 | 1.61E-04 | 0.0027 |
| JADE3            | 2.04 | 1.21E-03 | 0.0072 |
| CCDC18           | 2.04 | 1.57E-03 | 0.0083 |
| NUP93            | 2.04 | 1.02E-04 | 0.0023 |
| DHRS7B           | 2.04 | 3.37E-04 | 0.0037 |
| UBR7             | 2.04 | 1.73E-04 | 0.0028 |
| ENST000003421731 | 2.04 | 9.81E-04 | 0.0064 |
| ILF2             | 2.04 | 2.99E-04 | 0.0035 |
| AL138724.1       | 2.04 | 6.24E-03 | 0.0195 |
| ENST000003393740 | 2.04 | 2.62E-04 | 0.0033 |
| ENST000002459320 | 2.04 | 2.85E-04 | 0.0035 |
| HCFC1R1          | 2.03 | 1.22E-02 | 0.0309 |
| ZCRB1            | 2.03 | 1.25E-04 | 0.0025 |
| ENST000002615311 | 2.03 | 2.18E-04 | 0.0031 |
| AC051619.7       | 2.03 | 5.76E-03 | 0.0185 |
| CPM              | 2.03 | 3.42E-04 | 0.0038 |
| ZNF311           | 2.03 | 2.64E-03 | 0.0113 |
| SKA2             | 2.03 | 2.83E-04 | 0.0035 |
| EFCAB11          | 2.03 | 2.33E-03 | 0.0104 |
| IDH2             | 2.03 | 1.05E-04 | 0.0023 |
| SRD5A3           | 2.03 | 1.32E-03 | 0.0075 |
| ENST000003336510 | 2.03 | 4.02E-04 | 0.0040 |
| ENST000003176101 | 2.03 | 1.49E-03 | 0.0081 |
| TXNRD1           | 2.03 | 1.47E-04 | 0.0026 |
| ZNF232           | 2.03 | 2.52E-03 | 0.0110 |
| DPAGT1           | 2.03 | 1.52E-04 | 0.0027 |
| RNU5E-6P         | 2.03 | 7.08E-03 | 0.0212 |
| AP002990.1       | 2.03 | 3.41E-03 | 0.0131 |
| MLEC             | 2.02 | 6.61E-05 | 0.0019 |
| CDC123           | 2.02 | 4.78E-04 | 0.0044 |
| CIAO2A           | 2.02 | 1.46E-04 | 0.0026 |
| ODF2             | 2.02 | 2.14E-04 | 0.0031 |
| MEA1             | 2.02 | 9.83E-04 | 0.0064 |
| STAP2            | 2.02 | 5.38E-03 | 0.0177 |
| ZNF670           | 2.02 | 7.38E-04 | 0.0055 |
| GPI              | 2.02 | 3.61E-04 | 0.0038 |
| ECHDC3           | 2.02 | 4.29E-03 | 0.0153 |
| TAF1A            | 2.02 | 1.84E-04 | 0.0029 |
| ENST000002562160 | 2.02 | 1.56E-04 | 0.0027 |

|                  |      |          |        |
|------------------|------|----------|--------|
| ENST000002632700 | 2.02 | 7.80E-04 | 0.0056 |
| CTPS1            | 2.02 | 5.37E-04 | 0.0046 |
| DHX33            | 2.02 | 1.59E-04 | 0.0027 |
| MPZL3            | 2.02 | 4.42E-04 | 0.0042 |
| MED18            | 2.02 | 3.08E-04 | 0.0036 |
| SFXN4            | 2.02 | 3.69E-04 | 0.0039 |
| ENST000002641590 | 2.02 | 4.35E-03 | 0.0154 |
| TREX1            | 2.02 | 5.22E-03 | 0.0173 |
| AIFM1            | 2.02 | 8.63E-05 | 0.0021 |
| SKP2             | 2.02 | 2.32E-04 | 0.0032 |
| UNG              | 2.02 | 1.68E-04 | 0.0028 |
| REEP2            | 2.01 | 1.07E-03 | 0.0067 |
| RIDA             | 2.01 | 9.03E-04 | 0.0061 |
| FHOD1            | 2.01 | 4.54E-04 | 0.0043 |
| ACAA2            | 2.01 | 1.93E-03 | 0.0094 |
| FBXO45           | 2.01 | 1.31E-04 | 0.0025 |
| MELTF            | 2.01 | 1.22E-02 | 0.0309 |
| RCCD1            | 2.01 | 3.00E-04 | 0.0035 |
| ENST000002904290 | 2.01 | 2.88E-03 | 0.0118 |
| PCCB             | 2.00 | 2.03E-04 | 0.0030 |
| ENST000003101440 | 2.00 | 4.30E-04 | 0.0041 |
| ENST000003889950 | 2.00 | 9.37E-04 | 0.0062 |
| ENST000002221390 | 2.00 | 3.45E-03 | 0.0132 |
| ENST000003286490 | 2.00 | 1.52E-04 | 0.0027 |
| PSMA5            | 2.00 | 1.29E-04 | 0.0025 |
| ENST000002674151 | 2.00 | 1.84E-02 | 0.0414 |
| MRPL58           | 2.00 | 2.59E-04 | 0.0033 |
| SMC4             | 2.00 | 1.12E-04 | 0.0024 |
| MCUR1            | 2.00 | 8.79E-04 | 0.0060 |
| PHB2             | 2.00 | 1.08E-04 | 0.0023 |
| UBA1             | 2.00 | 1.32E-04 | 0.0025 |
| TMA16            | 2.00 | 5.26E-04 | 0.0046 |
| ACAT1            | 2.00 | 9.55E-05 | 0.0022 |
| ADAM15           | 2.00 | 5.57E-04 | 0.0047 |
| ENST000002253082 | 2.00 | 1.61E-02 | 0.0376 |
| SNRPD1           | 2.00 | 4.99E-04 | 0.0045 |
| ING2             | 1.99 | 2.39E-04 | 0.0032 |
| AC084082.1       | 1.99 | 1.55E-03 | 0.0083 |
| RALB             | 1.99 | 9.36E-05 | 0.0022 |
| SDHB             | 1.99 | 1.36E-04 | 0.0025 |
| PDCD5            | 1.99 | 1.28E-04 | 0.0025 |
| KNOP1            | 1.99 | 3.07E-04 | 0.0036 |
| RANGAP1          | 1.99 | 4.90E-04 | 0.0044 |
| TEDC1            | 1.99 | 2.23E-03 | 0.0101 |
| SRXN1            | 1.99 | 8.07E-04 | 0.0057 |
| TRIM25           | 1.99 | 5.28E-03 | 0.0175 |
| NFKBIL1          | 1.99 | 3.46E-04 | 0.0038 |



|                  |      |          |        |
|------------------|------|----------|--------|
| CKAP2            | 1.99 | 1.28E-04 | 0.0025 |
| ENST000003401921 | 1.99 | 9.32E-04 | 0.0062 |
| COL9A2           | 1.99 | 1.80E-03 | 0.0090 |
| BOLA2-SMG1P6     | 1.99 | 3.66E-04 | 0.0039 |
| ENST000003154231 | 1.98 | 6.17E-04 | 0.0050 |
| HSPA2            | 1.98 | 6.11E-04 | 0.0050 |
| ENST000003245930 | 1.98 | 5.22E-04 | 0.0045 |
| MLH1             | 1.98 | 1.15E-04 | 0.0024 |
| C1orf43          | 1.98 | 2.96E-04 | 0.0035 |
| GPR161           | 1.98 | 2.32E-02 | 0.0488 |
| SLC3A2           | 1.98 | 7.74E-05 | 0.0020 |
| PARP1            | 1.98 | 1.50E-04 | 0.0026 |
| C5orf30          | 1.98 | 5.03E-04 | 0.0045 |
| PI4K2B           | 1.98 | 1.22E-04 | 0.0024 |
| ENST000002624322 | 1.98 | 5.71E-04 | 0.0048 |
| AKR1A1           | 1.98 | 1.89E-04 | 0.0029 |
| NOTCH1           | 1.98 | 2.12E-04 | 0.0031 |
| CCDC168          | 1.98 | 1.28E-03 | 0.0074 |
| MRPL23           | 1.98 | 6.40E-04 | 0.0051 |
| ENST000002974400 | 1.98 | 3.14E-04 | 0.0036 |
| CREB3            | 1.98 | 1.83E-04 | 0.0029 |
| RELB             | 1.98 | 4.75E-04 | 0.0044 |
| CDK5             | 1.97 | 2.34E-03 | 0.0105 |
| ENST000002183282 | 1.97 | 7.91E-04 | 0.0057 |
| AFAP1            | 1.97 | 3.55E-04 | 0.0038 |
| SH2D4A           | 1.97 | 2.17E-03 | 0.0100 |
| RWDD2B           | 1.97 | 2.99E-03 | 0.0121 |
| YEATS4           | 1.97 | 2.18E-04 | 0.0031 |
| EIF2S1           | 1.97 | 5.19E-04 | 0.0045 |
| ENST000002941610 | 1.97 | 7.67E-04 | 0.0056 |
| NUP155           | 1.97 | 1.02E-04 | 0.0023 |
| ICMT             | 1.97 | 6.51E-04 | 0.0051 |
| ENST000003386350 | 1.97 | 2.79E-04 | 0.0034 |
| HIST1H2BD        | 1.97 | 5.78E-05 | 0.0018 |
| TRAF2            | 1.97 | 1.29E-04 | 0.0025 |
| TBL3             | 1.97 | 2.63E-04 | 0.0033 |
| NRIP3            | 1.97 | 1.67E-02 | 0.0386 |
| CSE1L            | 1.97 | 3.46E-04 | 0.0038 |
| HRH2             | 1.96 | 2.82E-03 | 0.0117 |
| ENST000002256651 | 1.96 | 2.21E-04 | 0.0031 |
| ZNF768           | 1.96 | 7.23E-04 | 0.0054 |
| CEP170B          | 1.96 | 1.11E-02 | 0.0289 |
| HSPBP1           | 1.96 | 8.06E-04 | 0.0057 |
| C12orf10         | 1.96 | 4.67E-04 | 0.0043 |
| HIVEP3           | 1.96 | 5.16E-04 | 0.0045 |
| EPRS             | 1.96 | 4.53E-05 | 0.0016 |
| RITA1            | 1.96 | 2.90E-04 | 0.0035 |

|                  |      |          |        |
|------------------|------|----------|--------|
| CHCHD1           | 1.96 | 2.10E-04 | 0.0030 |
| MYO1A            | 1.96 | 6.11E-03 | 0.0192 |
| CAD              | 1.96 | 4.53E-04 | 0.0043 |
| MRPS15           | 1.96 | 1.62E-04 | 0.0027 |
| MRPL16           | 1.96 | 5.37E-04 | 0.0046 |
| CBX6             | 1.96 | 1.07E-04 | 0.0023 |
| ENST000002298660 | 1.96 | 6.10E-04 | 0.0050 |
| LACTB            | 1.96 | 9.69E-05 | 0.0022 |
| ANKRD22          | 1.96 | 3.25E-03 | 0.0128 |
| ATP5PF           | 1.95 | 2.19E-04 | 0.0031 |
| ENST000003138353 | 1.95 | 3.20E-03 | 0.0126 |
| SLX1B            | 1.95 | 2.07E-04 | 0.0030 |
| RHOQP1           | 1.95 | 1.15E-03 | 0.0070 |
| NUP43            | 1.95 | 8.28E-05 | 0.0021 |
| MRPL3            | 1.95 | 2.99E-04 | 0.0035 |
| ACTG1            | 1.95 | 4.02E-04 | 0.0040 |
| CEP57L1          | 1.95 | 2.42E-04 | 0.0032 |
| HSCB             | 1.95 | 7.70E-04 | 0.0056 |
| ENST000003220671 | 1.95 | 2.02E-04 | 0.0030 |
| ENST000002346260 | 1.95 | 1.19E-02 | 0.0303 |
| ENST000003446291 | 1.95 | 9.16E-03 | 0.0253 |
| CD82             | 1.95 | 1.48E-03 | 0.0080 |
| FAM50B           | 1.95 | 5.79E-03 | 0.0186 |
| ANKRD34A         | 1.95 | 1.57E-02 | 0.0370 |
| SLIRP            | 1.94 | 1.28E-03 | 0.0074 |
| BST2             | 1.94 | 6.54E-04 | 0.0051 |
| PDIA6            | 1.94 | 1.31E-03 | 0.0075 |
| GEMIN5           | 1.94 | 3.26E-04 | 0.0037 |
| ERH              | 1.94 | 2.77E-04 | 0.0034 |
| ARMCX2           | 1.94 | 6.91E-03 | 0.0209 |
| GEMIN4           | 1.94 | 5.09E-04 | 0.0045 |
| DNMT3B           | 1.94 | 1.90E-03 | 0.0093 |
| ENST000002171952 | 1.94 | 1.20E-03 | 0.0071 |
| PKIG             | 1.94 | 1.28E-03 | 0.0074 |
| ENST000003318720 | 1.94 | 9.75E-03 | 0.0263 |
| GTPBP4           | 1.94 | 5.74E-04 | 0.0048 |
| MSH2             | 1.94 | 3.21E-04 | 0.0037 |
| TMEM231          | 1.94 | 1.99E-02 | 0.0437 |
| HCCS             | 1.94 | 5.73E-04 | 0.0048 |
| RAD51D           | 1.94 | 3.62E-04 | 0.0038 |
| PSMA4            | 1.93 | 7.83E-05 | 0.0020 |
| ENST000002886422 | 1.93 | 3.69E-03 | 0.0139 |
| ENST000003213371 | 1.93 | 1.02E-03 | 0.0065 |
| ENST000003016862 | 1.93 | 4.12E-03 | 0.0149 |
| HTATIP2          | 1.93 | 8.65E-05 | 0.0021 |
| AC004477.1       | 1.93 | 1.29E-03 | 0.0074 |
| IGHV1-3          | 1.93 | 1.48E-02 | 0.0355 |

|                  |      |          |        |
|------------------|------|----------|--------|
| LINC02416        | 1.93 | 8.47E-03 | 0.0239 |
| CHCHD10          | 1.93 | 5.13E-04 | 0.0045 |
| ACTL6A           | 1.93 | 3.76E-04 | 0.0039 |
| SNAPC1           | 1.93 | 4.03E-04 | 0.0040 |
| STAMBP           | 1.93 | 9.74E-05 | 0.0022 |
| NQO1             | 1.93 | 4.47E-03 | 0.0157 |
| ENST000001682160 | 1.93 | 1.43E-03 | 0.0079 |
| ENST000003017641 | 1.93 | 2.00E-04 | 0.0030 |
| VBP1             | 1.93 | 3.61E-04 | 0.0038 |
| PCGF6            | 1.93 | 1.82E-04 | 0.0029 |
| ST20-MTHFS       | 1.93 | 2.16E-03 | 0.0100 |
| MAGT1            | 1.93 | 4.79E-04 | 0.0044 |
| WDR83            | 1.93 | 9.04E-04 | 0.0061 |
| ERAL1            | 1.92 | 1.62E-04 | 0.0027 |
| ECI1             | 1.92 | 2.12E-04 | 0.0031 |
| WBP4             | 1.92 | 4.16E-04 | 0.0041 |
| HAT1             | 1.92 | 2.43E-04 | 0.0032 |
| SNX5             | 1.92 | 6.48E-05 | 0.0019 |
| NDUFS6           | 1.92 | 4.52E-04 | 0.0043 |
| MVD              | 1.92 | 1.61E-04 | 0.0027 |
| KCTD15           | 1.92 | 4.86E-03 | 0.0165 |
| MAGI3            | 1.92 | 6.05E-03 | 0.0191 |
| C17orf49         | 1.92 | 9.78E-03 | 0.0264 |
| PDSS1            | 1.92 | 6.39E-04 | 0.0051 |
| TMED7-TICAM2     | 1.92 | 5.77E-04 | 0.0048 |
| AC004585.1       | 1.92 | 1.02E-02 | 0.0271 |
| ROM1             | 1.92 | 6.74E-03 | 0.0205 |
| NOC3L            | 1.92 | 3.67E-04 | 0.0039 |
| METTL5           | 1.92 | 9.84E-05 | 0.0022 |
| CNP              | 1.92 | 1.69E-04 | 0.0028 |
| ASL              | 1.92 | 2.23E-03 | 0.0101 |
| ENST000003167881 | 1.91 | 2.82E-04 | 0.0035 |
| ENST000002646700 | 1.91 | 4.64E-04 | 0.0043 |
| ATG101           | 1.91 | 3.03E-04 | 0.0036 |
| SREBF2           | 1.91 | 6.66E-04 | 0.0052 |
| ECHS1            | 1.91 | 1.07E-03 | 0.0067 |
| IL2RB            | 1.91 | 3.23E-03 | 0.0127 |
| OXCT1            | 1.91 | 8.62E-05 | 0.0021 |
| OAZ1             | 1.91 | 1.19E-04 | 0.0024 |
| ENST000002805510 | 1.91 | 1.88E-03 | 0.0092 |
| AC091057.4       | 1.91 | 2.98E-03 | 0.0121 |
| AC254944.2       | 1.91 | 2.98E-03 | 0.0121 |
| ENST000003306510 | 1.91 | 1.11E-03 | 0.0068 |
| SLC43A1          | 1.91 | 4.73E-04 | 0.0044 |
| FKBP7            | 1.91 | 3.98E-03 | 0.0145 |
| ENST000002476651 | 1.91 | 2.95E-04 | 0.0035 |
| PDGFA            | 1.91 | 7.23E-03 | 0.0215 |

|                  |      |          |        |
|------------------|------|----------|--------|
| AC069368.1       | 1.91 | 1.94E-03 | 0.0094 |
| CUL7             | 1.91 | 9.68E-04 | 0.0064 |
| IFI35            | 1.91 | 2.68E-04 | 0.0034 |
| TXLNA            | 1.91 | 1.01E-04 | 0.0022 |
| GNL3             | 1.91 | 2.95E-04 | 0.0035 |
| CLIC1            | 1.90 | 2.77E-04 | 0.0034 |
| OAS2             | 1.90 | 2.79E-03 | 0.0116 |
| EMILIN2          | 1.90 | 1.92E-03 | 0.0093 |
| ZNF282           | 1.90 | 5.32E-03 | 0.0175 |
| CD276            | 1.90 | 1.07E-02 | 0.0280 |
| AL359504.2       | 1.90 | 1.85E-02 | 0.0416 |
| LINC00235        | 1.90 | 3.90E-03 | 0.0143 |
| CHRNA5           | 1.90 | 4.09E-03 | 0.0148 |
| HSPA1A           | 1.90 | 4.64E-03 | 0.0161 |
| CMAS             | 1.90 | 1.18E-04 | 0.0024 |
| EML2             | 1.90 | 1.79E-04 | 0.0028 |
| MGME1            | 1.90 | 1.95E-04 | 0.0030 |
| GTF2H4           | 1.90 | 1.35E-03 | 0.0076 |
| PMVK             | 1.90 | 2.81E-04 | 0.0035 |
| HNRNPF           | 1.90 | 7.66E-05 | 0.0020 |
| UEVLD            | 1.90 | 1.99E-04 | 0.0030 |
| G6PD             | 1.90 | 2.90E-04 | 0.0035 |
| TIMM23           | 1.90 | 7.19E-04 | 0.0054 |
| C1orf109         | 1.90 | 5.26E-04 | 0.0046 |
| NDUFB3           | 1.90 | 2.65E-04 | 0.0034 |
| ACOT13           | 1.89 | 3.05E-04 | 0.0036 |
| MRPL24           | 1.89 | 5.72E-04 | 0.0048 |
| DDX11            | 1.89 | 5.11E-04 | 0.0045 |
| ENST000002799071 | 1.89 | 1.29E-04 | 0.0025 |
| RAD18            | 1.89 | 1.09E-04 | 0.0023 |
| NOP56            | 1.89 | 1.26E-03 | 0.0073 |
| UROD             | 1.89 | 1.77E-04 | 0.0028 |
| DUSP4            | 1.89 | 5.68E-03 | 0.0184 |
| SARS             | 1.89 | 1.55E-04 | 0.0027 |
| LYPLA1           | 1.89 | 1.08E-04 | 0.0023 |
| ENST000003077672 | 1.89 | 1.03E-02 | 0.0274 |
| MCTS1            | 1.89 | 2.34E-04 | 0.0032 |
| ENST000003489110 | 1.89 | 7.29E-03 | 0.0216 |
| AL589666.1       | 1.89 | 1.47E-02 | 0.0352 |
| ENST000002501131 | 1.89 | 2.36E-04 | 0.0032 |
| ATP23            | 1.89 | 1.74E-02 | 0.0397 |
| ENST000002656632 | 1.89 | 8.01E-04 | 0.0057 |
| RAD51C           | 1.89 | 4.31E-03 | 0.0153 |
| CUEDC2           | 1.89 | 1.79E-04 | 0.0028 |
| RAB11FIP1        | 1.88 | 1.28E-04 | 0.0025 |
| IL3              | 1.88 | 3.17E-03 | 0.0126 |
| HERC5            | 1.88 | 7.16E-04 | 0.0054 |

|                  |      |          |        |
|------------------|------|----------|--------|
| SCARNA22         | 1.88 | 3.39E-03 | 0.0131 |
| PSMD13           | 1.88 | 1.57E-04 | 0.0027 |
| MRPS17           | 1.88 | 2.70E-03 | 0.0114 |
| LAMTOR2          | 1.88 | 4.70E-04 | 0.0044 |
| PPID             | 1.88 | 2.99E-04 | 0.0035 |
| GOLGA2P7         | 1.88 | 3.77E-03 | 0.0140 |
| EEF2KMT          | 1.88 | 6.29E-03 | 0.0196 |
| RNF187           | 1.88 | 8.05E-04 | 0.0057 |
| CELSR3           | 1.88 | 7.52E-04 | 0.0055 |
| ELP5             | 1.88 | 4.90E-04 | 0.0044 |
| FKBP1A           | 1.87 | 1.92E-04 | 0.0029 |
| DKC1             | 1.87 | 5.77E-04 | 0.0048 |
| CMPK2            | 1.87 | 7.37E-03 | 0.0218 |
| PGAM5            | 1.87 | 4.28E-04 | 0.0041 |
| GLE1             | 1.87 | 1.10E-04 | 0.0023 |
| COA7             | 1.87 | 5.09E-04 | 0.0045 |
| NIFK             | 1.87 | 2.13E-04 | 0.0031 |
| ZBTB46           | 1.87 | 1.96E-02 | 0.0433 |
| HTRA2            | 1.87 | 6.95E-04 | 0.0053 |
| HYAL2            | 1.87 | 7.15E-03 | 0.0213 |
| SUPT16H          | 1.87 | 2.90E-04 | 0.0035 |
| ENST000002516070 | 1.87 | 1.78E-04 | 0.0028 |
| PDHA1            | 1.87 | 3.00E-04 | 0.0035 |
| TSR1             | 1.87 | 5.94E-04 | 0.0049 |
| ENST000002855180 | 1.87 | 7.56E-04 | 0.0055 |
| KIF20B           | 1.87 | 1.83E-04 | 0.0029 |
| ALCAM            | 1.87 | 4.13E-04 | 0.0041 |
| NAA38            | 1.87 | 7.14E-04 | 0.0054 |
| TBKBP1           | 1.87 | 7.54E-04 | 0.0055 |
| GNPDA1           | 1.87 | 3.77E-03 | 0.0140 |
| RNF144A-AS1      | 1.87 | 1.84E-03 | 0.0091 |
| CBX8             | 1.87 | 3.90E-03 | 0.0143 |
| RAPGEF3          | 1.87 | 9.73E-03 | 0.0263 |
| CCHCR1           | 1.86 | 1.73E-04 | 0.0028 |
| SIRT4            | 1.86 | 6.31E-03 | 0.0196 |
| ZNF771           | 1.86 | 1.35E-02 | 0.0332 |
| COPG2            | 1.86 | 2.21E-04 | 0.0031 |
| ANKRD24          | 1.86 | 4.78E-03 | 0.0164 |
| SET              | 1.86 | 1.26E-03 | 0.0073 |
| SNX9             | 1.86 | 2.05E-03 | 0.0097 |
| CKLF             | 1.86 | 7.64E-04 | 0.0056 |
| NT5C             | 1.86 | 8.24E-04 | 0.0058 |
| EIF6             | 1.86 | 4.09E-03 | 0.0148 |
| NUDT21           | 1.86 | 3.27E-04 | 0.0037 |
| SWI5             | 1.86 | 4.94E-04 | 0.0044 |
| ENST000002885320 | 1.86 | 4.48E-04 | 0.0042 |
| ENST000002629603 | 1.86 | 4.82E-04 | 0.0044 |

|                   |      |          |        |
|-------------------|------|----------|--------|
| FLYWCH2           | 1.86 | 8.49E-03 | 0.0240 |
| RNF181            | 1.86 | 1.71E-04 | 0.0028 |
| BCCIP             | 1.86 | 2.00E-04 | 0.0030 |
| GEMIN6            | 1.86 | 7.09E-04 | 0.0054 |
| AHCYL1            | 1.86 | 2.18E-04 | 0.0031 |
| MTERF3            | 1.86 | 6.43E-04 | 0.0051 |
| ENST000000130700  | 1.86 | 6.28E-04 | 0.0050 |
| ENST0000003147970 | 1.86 | 1.05E-04 | 0.0023 |
| RPSAP13           | 1.86 | 4.16E-03 | 0.0150 |
| FIRRE             | 1.86 | 3.87E-03 | 0.0143 |
| ACLY              | 1.86 | 1.32E-04 | 0.0025 |
| ENST0000003281782 | 1.86 | 1.36E-03 | 0.0076 |
| ATP5MD            | 1.86 | 2.46E-04 | 0.0032 |
| UQCC2             | 1.86 | 1.98E-04 | 0.0030 |
| ERG28             | 1.85 | 7.82E-04 | 0.0056 |
| ELAVL1            | 1.85 | 2.12E-04 | 0.0031 |
| SIAH2             | 1.85 | 9.41E-05 | 0.0022 |
| GAR1              | 1.85 | 1.46E-03 | 0.0080 |
| GTF3C5            | 1.85 | 1.95E-04 | 0.0030 |
| MPG               | 1.85 | 3.24E-04 | 0.0037 |
| ENST0000003601280 | 1.85 | 2.47E-04 | 0.0032 |
| AC097534.1        | 1.85 | 4.15E-03 | 0.0150 |
| ENST0000002425770 | 1.85 | 7.49E-03 | 0.0221 |
| CCDC15            | 1.85 | 3.07E-03 | 0.0123 |
| JPT2              | 1.85 | 6.98E-04 | 0.0053 |
| ITGA2             | 1.85 | 4.91E-04 | 0.0044 |
| MBD3              | 1.85 | 2.03E-03 | 0.0096 |
| ELK1              | 1.85 | 4.11E-04 | 0.0041 |
| SHC4              | 1.85 | 1.00E-03 | 0.0065 |
| FP565260.1        | 1.85 | 1.38E-02 | 0.0336 |
| AC018926.2        | 1.85 | 7.64E-03 | 0.0223 |
| KPNA2             | 1.84 | 1.30E-04 | 0.0025 |
| CCDC47            | 1.84 | 5.16E-04 | 0.0045 |
| TNFAIP8L2         | 1.84 | 3.75E-04 | 0.0039 |
| GMPPB             | 1.84 | 3.37E-03 | 0.0131 |
| SLC2A1            | 1.84 | 4.57E-04 | 0.0043 |
| ARID5A            | 1.84 | 4.06E-04 | 0.0040 |
| ATP5MF            | 1.84 | 1.79E-04 | 0.0028 |
| NAA20             | 1.84 | 3.58E-04 | 0.0038 |
| ENST0000003074500 | 1.84 | 4.49E-03 | 0.0157 |
| MRPL19            | 1.84 | 2.42E-04 | 0.0032 |
| AC010422.5        | 1.84 | 1.83E-03 | 0.0091 |
| TWF2              | 1.84 | 1.25E-04 | 0.0025 |
| HECTD2            | 1.84 | 1.07E-03 | 0.0067 |
| ZNF473            | 1.84 | 7.30E-04 | 0.0055 |
| KEAP1             | 1.84 | 4.98E-04 | 0.0045 |
| REEP4             | 1.84 | 2.23E-03 | 0.0101 |

|                  |      |          |        |
|------------------|------|----------|--------|
| HUWE1            | 1.84 | 6.33E-04 | 0.0051 |
| HDLBP            | 1.84 | 7.64E-05 | 0.0020 |
| CENPP            | 1.83 | 8.84E-03 | 0.0246 |
| ZNF57            | 1.83 | 2.85E-03 | 0.0118 |
| POLDIP2          | 1.83 | 6.65E-04 | 0.0052 |
| TMPO             | 1.83 | 3.23E-04 | 0.0037 |
| RPP40            | 1.83 | 8.88E-03 | 0.0247 |
| KCTD11           | 1.83 | 1.24E-02 | 0.0313 |
| MRPL40           | 1.83 | 6.50E-04 | 0.0051 |
| ZNF724           | 1.83 | 2.30E-04 | 0.0032 |
| BUD31            | 1.83 | 2.32E-04 | 0.0032 |
| MRPL45           | 1.83 | 1.96E-04 | 0.0030 |
| PSMD2            | 1.83 | 3.19E-04 | 0.0037 |
| ENST000002606651 | 1.82 | 9.33E-05 | 0.0022 |
| SCOC             | 1.82 | 5.13E-04 | 0.0045 |
| SNORD91B         | 1.82 | 5.88E-03 | 0.0188 |
| ENST000003115593 | 1.82 | 8.98E-03 | 0.0249 |
| WDR24            | 1.82 | 6.52E-04 | 0.0051 |
| MRPL18           | 1.82 | 5.94E-04 | 0.0049 |
| TBL2             | 1.82 | 3.53E-04 | 0.0038 |
| LSM11            | 1.82 | 2.17E-04 | 0.0031 |
| ENST000003084361 | 1.82 | 1.67E-03 | 0.0086 |
| ENST000003403420 | 1.82 | 1.20E-02 | 0.0305 |
| ETF1             | 1.82 | 9.98E-04 | 0.0064 |
| POLR1B           | 1.82 | 2.05E-04 | 0.0030 |
| TAP1             | 1.82 | 1.96E-04 | 0.0030 |
| LIN9             | 1.82 | 4.57E-04 | 0.0043 |
| SPA17            | 1.82 | 1.63E-03 | 0.0085 |
| ULK4P2           | 1.82 | 7.44E-03 | 0.0220 |
| MRPS12           | 1.82 | 7.28E-04 | 0.0055 |
| TTC4             | 1.82 | 5.84E-04 | 0.0048 |
| ENST000003188421 | 1.82 | 1.20E-03 | 0.0071 |
| RNPEP            | 1.82 | 9.77E-04 | 0.0064 |
| TMEM70           | 1.82 | 2.26E-04 | 0.0031 |
| ENST000003082713 | 1.82 | 2.86E-03 | 0.0118 |
| TSTA3            | 1.82 | 9.19E-04 | 0.0062 |
| TMEM201          | 1.82 | 2.04E-02 | 0.0445 |
| CANX             | 1.82 | 1.66E-04 | 0.0028 |
| NDUFB7           | 1.82 | 5.17E-04 | 0.0045 |
| HAUS4            | 1.81 | 1.65E-03 | 0.0086 |
| GALNT2           | 1.81 | 2.07E-04 | 0.0030 |
| ENST000003022431 | 1.81 | 1.16E-03 | 0.0070 |
| PFN1             | 1.81 | 1.34E-03 | 0.0076 |
| PSMG3            | 1.81 | 2.75E-03 | 0.0116 |
| ENST000002403330 | 1.81 | 9.59E-04 | 0.0063 |
| IFI27L2          | 1.81 | 3.89E-04 | 0.0040 |
| HSPA13           | 1.81 | 1.18E-04 | 0.0024 |

|                  |      |          |        |
|------------------|------|----------|--------|
| IFT46            | 1.81 | 4.74E-04 | 0.0044 |
| CMYA5            | 1.81 | 2.88E-03 | 0.0118 |
| HIST1H1C         | 1.81 | 1.75E-04 | 0.0028 |
| ARMT1            | 1.81 | 4.89E-04 | 0.0044 |
| ENST000003047861 | 1.81 | 2.07E-04 | 0.0030 |
| PPM1G            | 1.81 | 4.24E-04 | 0.0041 |
| ENST000002674060 | 1.81 | 6.06E-03 | 0.0191 |
| SMIM30           | 1.81 | 5.71E-04 | 0.0048 |
| SRR              | 1.81 | 1.31E-03 | 0.0075 |
| NTMT1            | 1.81 | 3.49E-04 | 0.0038 |
| IRF7             | 1.81 | 4.36E-03 | 0.0154 |
| HDAC7            | 1.81 | 6.73E-04 | 0.0052 |
| RBPJ             | 1.81 | 1.11E-04 | 0.0023 |
| MRPL36           | 1.81 | 9.91E-04 | 0.0064 |
| APOO             | 1.80 | 1.33E-03 | 0.0075 |
| NMB              | 1.80 | 7.84E-03 | 0.0228 |
| IKZF4            | 1.80 | 1.43E-02 | 0.0345 |
| NDST1            | 1.80 | 4.84E-03 | 0.0165 |
| ENST000003060520 | 1.80 | 3.41E-04 | 0.0037 |
| NDUFA6           | 1.80 | 2.09E-02 | 0.0452 |
| HIST1H2AC        | 1.80 | 5.59E-04 | 0.0047 |
| SLC25A17         | 1.80 | 4.46E-04 | 0.0042 |
| BCL6             | 1.80 | 7.94E-03 | 0.0230 |
| RPP25L           | 1.80 | 1.54E-03 | 0.0082 |
| DAD1             | 1.80 | 5.86E-04 | 0.0048 |
| SFXN1            | 1.80 | 1.51E-04 | 0.0026 |
| C6orf52          | 1.80 | 1.01E-02 | 0.0270 |
| ENST000003255992 | 1.80 | 6.11E-04 | 0.0050 |
| CDK7             | 1.80 | 1.70E-04 | 0.0028 |
| TCEA1            | 1.80 | 2.29E-04 | 0.0032 |
| GUCD1            | 1.80 | 1.81E-04 | 0.0029 |
| NDUFB8           | 1.80 | 1.08E-04 | 0.0023 |
| MRPS18A          | 1.80 | 3.44E-04 | 0.0038 |
| TFB1M            | 1.80 | 2.63E-04 | 0.0033 |
| HGH1             | 1.80 | 2.30E-03 | 0.0104 |
| GCNT1            | 1.79 | 1.49E-03 | 0.0081 |
| IFIH1            | 1.79 | 2.51E-03 | 0.0109 |
| RPL12P16         | 1.79 | 1.64E-02 | 0.0380 |
| DNPH1            | 1.79 | 1.45E-02 | 0.0350 |
| ENST000003017881 | 1.79 | 1.33E-03 | 0.0075 |
| ENST000002982880 | 1.79 | 1.23E-02 | 0.0311 |
| CEP72            | 1.79 | 4.50E-03 | 0.0157 |
| DDB2             | 1.79 | 1.40E-04 | 0.0026 |
| SSTR3            | 1.79 | 1.22E-02 | 0.0308 |
| MRPL47           | 1.79 | 2.59E-04 | 0.0033 |
| UBE2V2           | 1.79 | 1.54E-04 | 0.0027 |
| XRCC6            | 1.79 | 2.60E-04 | 0.0033 |



|                  |      |          |        |
|------------------|------|----------|--------|
| ENST000003310790 | 1.79 | 1.36E-03 | 0.0076 |
| LRRC20           | 1.79 | 2.16E-03 | 0.0100 |
| ENST000002646890 | 1.79 | 1.10E-03 | 0.0068 |
| MOSPD3           | 1.79 | 2.07E-02 | 0.0450 |
| C6orf141         | 1.79 | 7.47E-03 | 0.0220 |
| RDX              | 1.79 | 2.38E-04 | 0.0032 |
| GPAA1            | 1.79 | 3.35E-03 | 0.0130 |
| PALD1            | 1.79 | 1.70E-03 | 0.0087 |
| RAPH1            | 1.79 | 1.35E-03 | 0.0076 |
| ENST000002623061 | 1.79 | 1.03E-03 | 0.0066 |
| AL590483.1       | 1.79 | 1.29E-02 | 0.0321 |
| FSTL3            | 1.78 | 6.67E-03 | 0.0204 |
| ABCF1            | 1.78 | 2.69E-03 | 0.0114 |
| TMEM14C          | 1.78 | 2.09E-04 | 0.0030 |
| PKP4             | 1.78 | 1.26E-03 | 0.0073 |
| PSMB2            | 1.78 | 2.87E-04 | 0.0035 |
| C16orf95         | 1.78 | 1.24E-02 | 0.0311 |
| ENOPH1           | 1.78 | 1.21E-04 | 0.0024 |
| MTHFD1           | 1.78 | 2.71E-04 | 0.0034 |
| DYNC2LI1         | 1.78 | 1.69E-03 | 0.0087 |
| MYCBP            | 1.78 | 2.25E-04 | 0.0031 |
| SPINDOC          | 1.78 | 2.73E-03 | 0.0115 |
| CTIF             | 1.78 | 1.79E-02 | 0.0405 |
| PRIM1            | 1.78 | 9.55E-04 | 0.0063 |
| ATP5F1B          | 1.78 | 1.29E-04 | 0.0025 |
| DARS             | 1.78 | 1.10E-04 | 0.0023 |
| ENST000002766920 | 1.78 | 7.75E-04 | 0.0056 |
| TFPT             | 1.78 | 4.08E-04 | 0.0041 |
| LYAR             | 1.78 | 1.69E-03 | 0.0086 |
| DHX32            | 1.78 | 3.44E-04 | 0.0038 |
| ENST000002810811 | 1.78 | 2.12E-03 | 0.0099 |
| GNL2             | 1.78 | 4.83E-04 | 0.0044 |
| ADPRHL2          | 1.78 | 3.40E-04 | 0.0037 |
| SLBP             | 1.78 | 1.07E-03 | 0.0067 |
| ODC1             | 1.78 | 7.91E-03 | 0.0229 |
| SF3B6            | 1.78 | 3.64E-04 | 0.0039 |
| FBL              | 1.78 | 7.87E-04 | 0.0056 |
| IMMT             | 1.78 | 2.26E-04 | 0.0031 |
| NCAPH2           | 1.78 | 1.66E-04 | 0.0028 |
| BZW1P2           | 1.77 | 2.23E-03 | 0.0101 |
| KHK              | 1.77 | 8.44E-04 | 0.0059 |
| FANCE            | 1.77 | 2.14E-03 | 0.0099 |
| UQCRH            | 1.77 | 4.00E-04 | 0.0040 |
| MX1              | 1.77 | 4.39E-03 | 0.0155 |
| P4HA1            | 1.77 | 2.93E-04 | 0.0035 |
| RPLPOP6          | 1.77 | 2.30E-02 | 0.0485 |
| PPP1R7           | 1.77 | 2.03E-04 | 0.0030 |

|                  |      |          |        |
|------------------|------|----------|--------|
| DESI1            | 1.77 | 3.75E-04 | 0.0039 |
| PES1             | 1.77 | 1.29E-02 | 0.0321 |
| NEK6             | 1.77 | 2.35E-02 | 0.0493 |
| PSME2            | 1.77 | 6.88E-04 | 0.0053 |
| ENST000003453581 | 1.77 | 1.08E-02 | 0.0282 |
| BUD13            | 1.77 | 2.36E-04 | 0.0032 |
| SRPRB            | 1.77 | 2.91E-04 | 0.0035 |
| ENST000003418720 | 1.77 | 3.48E-03 | 0.0133 |
| SIGMAR1          | 1.77 | 3.37E-03 | 0.0131 |
| PPIH             | 1.77 | 2.98E-04 | 0.0035 |
| NANS             | 1.77 | 3.36E-04 | 0.0037 |
| VAR2             | 1.77 | 2.95E-04 | 0.0035 |
| LARP4            | 1.77 | 4.04E-04 | 0.0040 |
| MORF4L2          | 1.77 | 1.18E-04 | 0.0024 |
| POLR3K           | 1.77 | 3.59E-04 | 0.0038 |
| COPB2            | 1.77 | 9.62E-05 | 0.0022 |
| TMED8            | 1.77 | 1.26E-04 | 0.0025 |
| ENST000003131170 | 1.76 | 2.04E-02 | 0.0445 |
| ENST000003367330 | 1.76 | 6.93E-03 | 0.0209 |
| SLC17A9          | 1.76 | 2.08E-03 | 0.0097 |
| TOMM40L          | 1.76 | 1.95E-03 | 0.0094 |
| BZW1             | 1.76 | 2.08E-03 | 0.0098 |
| COQ8B            | 1.76 | 5.80E-04 | 0.0048 |
| MSMO1            | 1.76 | 1.23E-03 | 0.0073 |
| PTPN11           | 1.76 | 2.17E-04 | 0.0031 |
| CDKN2AIPNL       | 1.76 | 8.97E-04 | 0.0061 |
| NPM1             | 1.76 | 1.66E-04 | 0.0028 |
| ENST000003022710 | 1.76 | 7.48E-04 | 0.0055 |
| MKS1             | 1.76 | 5.27E-03 | 0.0174 |
| FAM43A           | 1.76 | 1.73E-02 | 0.0395 |
| ENST000002834290 | 1.76 | 1.05E-02 | 0.0277 |
| SMIM15           | 1.76 | 2.50E-04 | 0.0033 |
| RAB27A           | 1.76 | 1.55E-04 | 0.0027 |
| PLCXD1           | 1.76 | 1.03E-03 | 0.0066 |
| ENST000003136082 | 1.76 | 1.24E-03 | 0.0073 |
| TNFRSF14-AS1     | 1.76 | 7.06E-04 | 0.0054 |
| NLRX1            | 1.75 | 1.05E-03 | 0.0066 |
| B9D1             | 1.75 | 1.98E-02 | 0.0437 |
| PSMD11           | 1.75 | 2.30E-04 | 0.0032 |
| AC011893.1       | 1.75 | 1.32E-02 | 0.0327 |
| PDCD11           | 1.75 | 1.91E-04 | 0.0029 |
| BARD1            | 1.75 | 1.71E-04 | 0.0028 |
| MAP3K20          | 1.75 | 1.24E-02 | 0.0311 |
| NAGA             | 1.75 | 2.90E-04 | 0.0035 |
| MRPL35           | 1.75 | 5.28E-04 | 0.0046 |
| PRIMPOL          | 1.75 | 7.60E-03 | 0.0223 |
| KIAA0895L        | 1.75 | 8.50E-03 | 0.0240 |

|                  |      |          |        |
|------------------|------|----------|--------|
| ENST000002294160 | 1.75 | 6.27E-03 | 0.0195 |
| PLS1             | 1.75 | 1.01E-03 | 0.0065 |
| AC129492.1       | 1.75 | 3.08E-03 | 0.0123 |
| RF00024.1        | 1.75 | 5.30E-04 | 0.0046 |
| ADD2             | 1.75 | 9.78E-04 | 0.0064 |
| FARSB            | 1.75 | 2.81E-04 | 0.0035 |
| DDX19B           | 1.75 | 3.93E-03 | 0.0144 |
| SAE1             | 1.75 | 4.83E-04 | 0.0044 |
| IPO7             | 1.75 | 1.83E-04 | 0.0029 |
| NFKBIA           | 1.75 | 4.34E-04 | 0.0042 |
| ATP5MC3          | 1.74 | 4.24E-04 | 0.0041 |
| ENST000003140670 | 1.74 | 2.44E-03 | 0.0108 |
| ENST000003292142 | 1.74 | 3.79E-03 | 0.0141 |
| ST3GAL4          | 1.74 | 3.86E-03 | 0.0142 |
| SLC50A1          | 1.74 | 4.05E-04 | 0.0040 |
| HDGFL2           | 1.74 | 5.08E-04 | 0.0045 |
| COA4             | 1.74 | 2.03E-04 | 0.0030 |
| MYH15            | 1.74 | 1.61E-02 | 0.0375 |
| ENST000003438180 | 1.74 | 3.42E-04 | 0.0038 |
| DNMT1            | 1.74 | 1.88E-04 | 0.0029 |
| HPF1             | 1.74 | 5.19E-04 | 0.0045 |
| TRIM69           | 1.74 | 5.11E-04 | 0.0045 |
| ZDHHC16          | 1.74 | 1.18E-03 | 0.0071 |
| PDRG1            | 1.74 | 5.39E-04 | 0.0046 |
| MAP3K21          | 1.74 | 1.06E-03 | 0.0067 |
| INTS5            | 1.74 | 5.70E-04 | 0.0048 |
| RAB20            | 1.74 | 3.21E-03 | 0.0127 |
| NCKAP1           | 1.74 | 1.66E-03 | 0.0086 |
| AC012146.1       | 1.74 | 2.93E-03 | 0.0120 |
| TMEM186          | 1.73 | 2.03E-03 | 0.0096 |
| ISG15            | 1.73 | 2.17E-02 | 0.0464 |
| VPS25            | 1.73 | 2.90E-04 | 0.0035 |
| HIF1A            | 1.73 | 2.90E-04 | 0.0035 |
| AC105137.2       | 1.73 | 6.68E-03 | 0.0204 |
| TWNK             | 1.73 | 2.04E-03 | 0.0096 |
| IL15RA           | 1.73 | 1.41E-03 | 0.0078 |
| C3orf52          | 1.73 | 1.67E-03 | 0.0086 |
| SSCA1            | 1.73 | 1.97E-02 | 0.0435 |
| DUSP23           | 1.73 | 9.69E-03 | 0.0262 |
| KIF5A            | 1.73 | 2.03E-02 | 0.0443 |
| ENST000002623190 | 1.73 | 7.05E-03 | 0.0212 |
| CBX1             | 1.73 | 2.81E-04 | 0.0035 |
| DOLPP1           | 1.73 | 6.27E-04 | 0.0050 |
| AC099850.1       | 1.73 | 1.57E-02 | 0.0368 |
| LNP1             | 1.73 | 2.40E-03 | 0.0106 |
| NUDT15           | 1.73 | 2.17E-04 | 0.0031 |
| ENST000001695510 | 1.73 | 1.16E-03 | 0.0070 |

|                  |      |          |        |
|------------------|------|----------|--------|
| PIGX             | 1.73 | 6.07E-04 | 0.0049 |
| CA11             | 1.73 | 2.40E-03 | 0.0106 |
| TPD52L2          | 1.73 | 3.73E-04 | 0.0039 |
| PIP5K1A          | 1.73 | 1.37E-04 | 0.0026 |
| METAP2           | 1.73 | 3.70E-04 | 0.0039 |
| SNRPF            | 1.73 | 5.34E-04 | 0.0046 |
| SRPK1            | 1.73 | 1.58E-04 | 0.0027 |
| RDH11            | 1.73 | 1.75E-04 | 0.0028 |
| RNF26            | 1.73 | 3.35E-03 | 0.0130 |
| APEX1            | 1.72 | 1.19E-03 | 0.0071 |
| ZNF625-ZNF20     | 1.72 | 1.08E-03 | 0.0067 |
| ENST000003343790 | 1.72 | 6.46E-04 | 0.0051 |
| PNPT1            | 1.72 | 1.59E-04 | 0.0027 |
| ENST000003114810 | 1.72 | 4.52E-04 | 0.0043 |
| AL591845.1       | 1.72 | 3.86E-03 | 0.0142 |
| PSMD4            | 1.72 | 2.13E-04 | 0.0031 |
| TOPBP1           | 1.72 | 2.28E-04 | 0.0032 |
| ENST000003163860 | 1.72 | 4.12E-04 | 0.0041 |
| ZNF788P          | 1.72 | 2.94E-03 | 0.0120 |
| ENST000002705171 | 1.72 | 2.61E-03 | 0.0112 |
| ENST000003437880 | 1.72 | 8.87E-04 | 0.0060 |
| GSS              | 1.72 | 2.23E-04 | 0.0031 |
| POLR2I           | 1.72 | 1.09E-03 | 0.0067 |
| AFMID            | 1.72 | 7.29E-04 | 0.0055 |
| RINL             | 1.72 | 1.95E-04 | 0.0030 |
| MTIF2            | 1.72 | 3.04E-04 | 0.0036 |
| ENST000003075330 | 1.72 | 1.15E-03 | 0.0070 |
| SEC23B           | 1.72 | 1.27E-04 | 0.0025 |
| PAFAH1B3         | 1.71 | 1.67E-03 | 0.0086 |
| ENST000002693730 | 1.71 | 3.68E-04 | 0.0039 |
| RAB23            | 1.71 | 1.69E-03 | 0.0087 |
| 40422            | 1.71 | 2.79E-03 | 0.0116 |
| DNAJA3           | 1.71 | 2.39E-04 | 0.0032 |
| ENST000003034360 | 1.71 | 1.80E-04 | 0.0029 |
| NUP107           | 1.71 | 2.94E-04 | 0.0035 |
| PSMA1            | 1.71 | 3.38E-04 | 0.0037 |
| NETO2            | 1.71 | 9.19E-03 | 0.0253 |
| ENST000003571660 | 1.71 | 1.63E-02 | 0.0378 |
| DNAJC9           | 1.71 | 9.43E-04 | 0.0063 |
| PGRMC1           | 1.71 | 8.86E-04 | 0.0060 |
| PSMD12           | 1.71 | 2.15E-04 | 0.0031 |
| PPP1R18          | 1.71 | 3.60E-04 | 0.0038 |
| SAC3D1           | 1.71 | 5.88E-03 | 0.0188 |
| HDDC2            | 1.71 | 4.65E-04 | 0.0043 |
| NCKIPSD          | 1.71 | 2.11E-03 | 0.0098 |
| ALKBH2           | 1.71 | 7.61E-04 | 0.0056 |
| ENST000002642050 | 1.71 | 2.75E-04 | 0.0034 |

|                  |      |          |        |
|------------------|------|----------|--------|
| ENST000002781000 | 1.71 | 1.04E-03 | 0.0066 |
| ME2              | 1.70 | 1.91E-04 | 0.0029 |
| WDR46            | 1.70 | 3.02E-03 | 0.0122 |
| SNORA71A         | 1.70 | 2.17E-02 | 0.0464 |
| GOLIM4           | 1.70 | 1.59E-03 | 0.0084 |
| SNHG19           | 1.70 | 1.43E-03 | 0.0079 |
| POLR2F           | 1.70 | 5.42E-04 | 0.0046 |
| RBFA             | 1.70 | 3.30E-03 | 0.0129 |
| RNF5             | 1.70 | 7.94E-04 | 0.0057 |
| ROMO1            | 1.70 | 9.44E-04 | 0.0063 |
| SERBP1           | 1.70 | 4.08E-04 | 0.0041 |
| EPB41L2          | 1.70 | 2.68E-04 | 0.0034 |
| KIAA1671         | 1.70 | 1.62E-03 | 0.0085 |
| TIMM17B          | 1.70 | 3.14E-04 | 0.0036 |
| ATP5PB           | 1.70 | 3.95E-04 | 0.0040 |
| PUM3             | 1.70 | 7.58E-04 | 0.0055 |
| AC087632.1       | 1.70 | 1.21E-03 | 0.0072 |
| DMGDH            | 1.70 | 1.81E-03 | 0.0090 |
| RTCB             | 1.70 | 2.35E-04 | 0.0032 |
| GRWD1            | 1.70 | 2.40E-03 | 0.0107 |
| STAT5A           | 1.70 | 1.44E-04 | 0.0026 |
| CHMP2A           | 1.70 | 6.04E-04 | 0.0049 |
| GLDC             | 1.70 | 2.07E-02 | 0.0451 |
| IRF5             | 1.70 | 1.46E-03 | 0.0080 |
| SRF              | 1.70 | 6.41E-04 | 0.0051 |
| ZNF584           | 1.69 | 1.01E-03 | 0.0065 |
| ZNF492           | 1.69 | 9.49E-04 | 0.0063 |
| AC107871.1       | 1.69 | 1.10E-03 | 0.0068 |
| WDR3             | 1.69 | 1.15E-03 | 0.0069 |
| TMEM69           | 1.69 | 5.73E-04 | 0.0048 |
| LRRC32           | 1.69 | 3.50E-03 | 0.0134 |
| MON1A            | 1.69 | 1.11E-02 | 0.0289 |
| ALDH18A1         | 1.69 | 3.17E-04 | 0.0036 |
| MRPL22           | 1.69 | 2.45E-04 | 0.0032 |
| UTP14A           | 1.69 | 9.89E-04 | 0.0064 |
| ENST000003162730 | 1.69 | 2.46E-03 | 0.0108 |
| MRPS2            | 1.69 | 1.02E-03 | 0.0065 |
| ENST000003129702 | 1.69 | 3.96E-03 | 0.0145 |
| TMEM177          | 1.69 | 9.50E-04 | 0.0063 |
| ENST000002100601 | 1.69 | 1.25E-02 | 0.0314 |
| ENST000003543591 | 1.69 | 6.00E-03 | 0.0190 |
| HSD17B12         | 1.68 | 4.90E-04 | 0.0044 |
| MSL3P1           | 1.68 | 5.05E-03 | 0.0170 |
| SAAL1            | 1.68 | 5.13E-04 | 0.0045 |
| PRIM2            | 1.68 | 4.05E-04 | 0.0040 |
| FTSJ3            | 1.68 | 2.93E-03 | 0.0120 |
| CEBPG            | 1.68 | 1.76E-04 | 0.0028 |

|                  |      |          |        |
|------------------|------|----------|--------|
| ENST000003230642 | 1.68 | 3.22E-03 | 0.0127 |
| NUDT5            | 1.68 | 6.64E-04 | 0.0052 |
| PEX26            | 1.68 | 3.31E-04 | 0.0037 |
| AC017104.5       | 1.68 | 1.69E-02 | 0.0389 |
| PHF19            | 1.68 | 1.06E-03 | 0.0066 |
| WDCP             | 1.68 | 6.14E-04 | 0.0050 |
| GFOD1            | 1.68 | 4.21E-03 | 0.0151 |
| ENST000003164230 | 1.68 | 6.96E-03 | 0.0210 |
| ENST000003020350 | 1.68 | 1.50E-04 | 0.0026 |
| CBX3             | 1.68 | 3.28E-04 | 0.0037 |
| ENST000003008704 | 1.68 | 2.33E-04 | 0.0032 |
| DYNLL1           | 1.68 | 1.28E-03 | 0.0074 |
| KCTD21           | 1.68 | 1.38E-02 | 0.0337 |
| NBL1             | 1.68 | 8.25E-03 | 0.0235 |
| MAP3K8           | 1.68 | 2.53E-04 | 0.0033 |
| EIF2B3           | 1.68 | 4.28E-04 | 0.0041 |
| PRELID3B         | 1.67 | 1.68E-04 | 0.0028 |
| ENST000002623760 | 1.67 | 1.57E-03 | 0.0083 |
| GTF3C6           | 1.67 | 3.64E-03 | 0.0137 |
| CASP3            | 1.67 | 3.70E-04 | 0.0039 |
| NSMCE1           | 1.67 | 3.74E-04 | 0.0039 |
| SDF2L1           | 1.67 | 3.01E-03 | 0.0122 |
| SLC39A7          | 1.67 | 1.95E-04 | 0.0030 |
| SNRPD3           | 1.67 | 1.26E-03 | 0.0073 |
| PMF1             | 1.67 | 3.30E-04 | 0.0037 |
| ENST000003375391 | 1.67 | 6.53E-04 | 0.0051 |
| DNAJA1           | 1.67 | 9.03E-04 | 0.0061 |
| PSMB1            | 1.67 | 5.03E-04 | 0.0045 |
| PSMB8            | 1.67 | 2.93E-04 | 0.0035 |
| SARNP            | 1.67 | 1.54E-04 | 0.0027 |
| TMEM147          | 1.67 | 4.89E-04 | 0.0044 |
| SEC13            | 1.67 | 1.61E-04 | 0.0027 |
| HAUS8            | 1.67 | 3.93E-04 | 0.0040 |
| NRAV             | 1.67 | 1.52E-02 | 0.0361 |
| P4HB             | 1.67 | 1.92E-04 | 0.0029 |
| TRIM47           | 1.66 | 9.95E-04 | 0.0064 |
| MCRIP2           | 1.66 | 1.41E-02 | 0.0342 |
| FASN             | 1.66 | 7.48E-04 | 0.0055 |
| ESD              | 1.66 | 2.02E-04 | 0.0030 |
| BOLA1            | 1.66 | 6.65E-04 | 0.0052 |
| TMED9            | 1.66 | 3.43E-04 | 0.0038 |
| SCOC-AS1         | 1.66 | 1.83E-02 | 0.0413 |
| CHIT1            | 1.66 | 1.02E-02 | 0.0272 |
| ENST000002731561 | 1.66 | 7.77E-04 | 0.0056 |
| HDHD5            | 1.66 | 2.99E-04 | 0.0035 |
| BAK1             | 1.66 | 4.17E-04 | 0.0041 |
| GLRX2            | 1.66 | 2.98E-03 | 0.0121 |

|                  |      |          |        |
|------------------|------|----------|--------|
| PFDN4            | 1.66 | 2.22E-04 | 0.0031 |
| PRXL2A           | 1.66 | 4.52E-04 | 0.0043 |
| LSM12            | 1.66 | 3.85E-04 | 0.0039 |
| NR2F6            | 1.66 | 1.80E-02 | 0.0407 |
| ZNF787           | 1.66 | 1.60E-03 | 0.0084 |
| DBF4B            | 1.66 | 8.05E-03 | 0.0231 |
| ENST000002906630 | 1.65 | 7.89E-03 | 0.0228 |
| RAB39B           | 1.65 | 5.06E-04 | 0.0045 |
| AL139300.1       | 1.65 | 6.49E-04 | 0.0051 |
| EIF4G1           | 1.65 | 1.70E-04 | 0.0028 |
| ENST000003187873 | 1.65 | 8.08E-03 | 0.0232 |
| ZNF726           | 1.65 | 1.81E-03 | 0.0090 |
| CHSY1            | 1.65 | 3.47E-04 | 0.0038 |
| MAD2L1BP         | 1.65 | 3.68E-04 | 0.0039 |
| SEC61B           | 1.65 | 3.64E-04 | 0.0039 |
| RRAS2            | 1.65 | 5.09E-04 | 0.0045 |
| TRAF3            | 1.65 | 2.55E-04 | 0.0033 |
| TICRR            | 1.65 | 1.73E-03 | 0.0088 |
| MTLN             | 1.65 | 4.23E-03 | 0.0152 |
| SLC9A3-AS1       | 1.65 | 2.29E-02 | 0.0484 |
| RAC1             | 1.65 | 3.32E-04 | 0.0037 |
| ZBTB7B           | 1.65 | 8.68E-04 | 0.0060 |
| FABP5            | 1.65 | 1.23E-02 | 0.0310 |
| EARS2            | 1.65 | 1.34E-03 | 0.0076 |
| EPS8L1           | 1.64 | 1.76E-02 | 0.0400 |
| GDI2             | 1.64 | 2.61E-04 | 0.0033 |
| ODF3B            | 1.64 | 2.64E-03 | 0.0113 |
| ENST000003101320 | 1.64 | 2.14E-03 | 0.0099 |
| PRKRA-AS1        | 1.64 | 6.50E-04 | 0.0051 |
| SEPHS1           | 1.64 | 3.51E-04 | 0.0038 |
| PRDX2            | 1.64 | 5.41E-04 | 0.0046 |
| C1orf174         | 1.64 | 7.78E-04 | 0.0056 |
| TMED1            | 1.64 | 1.59E-03 | 0.0084 |
| RASGRP4          | 1.64 | 3.11E-03 | 0.0124 |
| MRPS35           | 1.64 | 1.92E-04 | 0.0029 |
| XRCC2            | 1.64 | 2.20E-04 | 0.0031 |
| APTX             | 1.64 | 4.47E-04 | 0.0042 |
| AL132780.3       | 1.64 | 2.93E-03 | 0.0120 |
| SREBF1           | 1.64 | 9.03E-03 | 0.0250 |
| AAMP             | 1.64 | 9.77E-04 | 0.0064 |
| RAD1             | 1.64 | 4.22E-04 | 0.0041 |
| NABP2            | 1.64 | 1.72E-03 | 0.0087 |
| SLX1A            | 1.64 | 6.95E-03 | 0.0210 |
| ERI1             | 1.64 | 5.89E-04 | 0.0049 |
| NTAN1P2          | 1.64 | 5.33E-03 | 0.0176 |
| EIF4A3           | 1.64 | 9.14E-04 | 0.0061 |
| MRPL14           | 1.64 | 5.69E-04 | 0.0048 |

|                  |      |          |        |
|------------------|------|----------|--------|
| PYCR3            | 1.64 | 2.03E-02 | 0.0444 |
| MAMDC4           | 1.64 | 1.87E-03 | 0.0092 |
| ZW10             | 1.64 | 2.48E-03 | 0.0109 |
| PGBD1            | 1.64 | 9.01E-03 | 0.0250 |
| APOBEC3C         | 1.64 | 5.18E-03 | 0.0173 |
| HYOU1            | 1.64 | 1.79E-04 | 0.0028 |
| HNRNPUL2-BSCL2   | 1.64 | 1.94E-03 | 0.0094 |
| MAST2            | 1.64 | 1.29E-03 | 0.0074 |
| C12orf60         | 1.64 | 7.75E-03 | 0.0226 |
| TMEM44           | 1.64 | 3.44E-03 | 0.0132 |
| AC004706.3       | 1.64 | 1.68E-02 | 0.0387 |
| RPA2             | 1.64 | 5.38E-04 | 0.0046 |
| RF00002.1        | 1.63 | 4.27E-03 | 0.0152 |
| RF00002.2        | 1.63 | 4.27E-03 | 0.0152 |
| RF00002.5        | 1.63 | 4.27E-03 | 0.0152 |
| RNA5-8SN1        | 1.63 | 4.27E-03 | 0.0152 |
| RNA5-8SN2        | 1.63 | 4.27E-03 | 0.0152 |
| RNA5-8SN3        | 1.63 | 4.27E-03 | 0.0152 |
| RNA5-8SN4        | 1.63 | 4.27E-03 | 0.0152 |
| RNA5-8SN5        | 1.63 | 4.27E-03 | 0.0152 |
| PRKDC            | 1.63 | 1.08E-04 | 0.0023 |
| DDX21            | 1.63 | 9.93E-04 | 0.0064 |
| CGAS             | 1.63 | 1.26E-03 | 0.0073 |
| AARS             | 1.63 | 1.56E-02 | 0.0367 |
| TNFAIP1          | 1.63 | 1.85E-03 | 0.0091 |
| PSMD10           | 1.63 | 4.05E-04 | 0.0040 |
| ADGRA3           | 1.63 | 2.11E-02 | 0.0457 |
| ACD              | 1.63 | 1.09E-03 | 0.0067 |
| DDX41            | 1.63 | 7.15E-04 | 0.0054 |
| ENST000003448431 | 1.63 | 8.51E-03 | 0.0240 |
| AC091057.1       | 1.63 | 1.15E-03 | 0.0069 |
| ITPRIPL1         | 1.63 | 2.74E-03 | 0.0115 |
| SNORD3B-2        | 1.63 | 3.99E-04 | 0.0040 |
| NEXN             | 1.62 | 4.25E-03 | 0.0152 |
| LGALS14          | 1.62 | 2.06E-02 | 0.0448 |
| GLUD1            | 1.62 | 1.84E-04 | 0.0029 |
| CFAP20           | 1.62 | 2.43E-03 | 0.0107 |
| ILVBL            | 1.62 | 2.03E-03 | 0.0096 |
| ABCD3            | 1.62 | 6.52E-04 | 0.0051 |
| PHLDA1           | 1.62 | 3.65E-03 | 0.0138 |
| KMT5C            | 1.62 | 4.90E-03 | 0.0166 |
| ENST000002845510 | 1.62 | 1.70E-02 | 0.0391 |
| ENST000003321180 | 1.62 | 1.60E-02 | 0.0374 |
| STT3A            | 1.62 | 2.42E-04 | 0.0032 |
| APOBEC3G         | 1.62 | 9.70E-04 | 0.0064 |
| BRIX1            | 1.62 | 5.66E-04 | 0.0048 |
| ENST000003306192 | 1.62 | 1.04E-03 | 0.0066 |



|                  |      |          |        |
|------------------|------|----------|--------|
| ACADM            | 1.62 | 3.68E-04 | 0.0039 |
| FAM161A          | 1.62 | 6.60E-03 | 0.0202 |
| COQ2             | 1.62 | 1.31E-03 | 0.0075 |
| ENST000003025505 | 1.62 | 4.28E-04 | 0.0041 |
| ENST000002620330 | 1.62 | 2.29E-04 | 0.0032 |
| RFC1             | 1.62 | 2.01E-04 | 0.0030 |
| DHODH            | 1.61 | 9.85E-04 | 0.0064 |
| C15orf38-AP3S2   | 1.61 | 2.33E-03 | 0.0104 |
| SEC61G           | 1.61 | 2.99E-04 | 0.0035 |
| POP4             | 1.61 | 1.65E-03 | 0.0086 |
| PSMC4            | 1.61 | 1.58E-03 | 0.0083 |
| ENST000003180031 | 1.61 | 1.09E-02 | 0.0285 |
| UBB              | 1.61 | 7.32E-04 | 0.0055 |
| TOMM22           | 1.61 | 9.56E-04 | 0.0063 |
| NUDCD2           | 1.61 | 2.47E-04 | 0.0032 |
| GPANK1           | 1.61 | 9.96E-04 | 0.0064 |
| TKFC             | 1.61 | 9.55E-04 | 0.0063 |
| TGDS             | 1.61 | 2.82E-04 | 0.0035 |
| PHF6             | 1.61 | 3.45E-04 | 0.0038 |
| RRM2B            | 1.61 | 3.79E-04 | 0.0039 |
| MINPP1           | 1.61 | 9.83E-04 | 0.0064 |
| DUSP3            | 1.61 | 1.44E-03 | 0.0079 |
| TMEM173          | 1.61 | 8.57E-04 | 0.0059 |
| IL21R            | 1.61 | 2.24E-03 | 0.0102 |
| B4GALT5          | 1.61 | 5.88E-04 | 0.0049 |
| TXN2             | 1.61 | 4.51E-04 | 0.0043 |
| DCPS             | 1.61 | 3.68E-04 | 0.0039 |
| KCTD17           | 1.60 | 3.39E-03 | 0.0131 |
| ENST000003213311 | 1.60 | 2.85E-03 | 0.0118 |
| GNB1L            | 1.60 | 2.96E-03 | 0.0121 |
| RPL7L1           | 1.60 | 7.22E-04 | 0.0054 |
| GON7             | 1.60 | 3.28E-03 | 0.0128 |
| TMX1             | 1.60 | 2.44E-04 | 0.0032 |
| FAM173A          | 1.60 | 4.41E-03 | 0.0155 |
| CLTA             | 1.60 | 1.15E-03 | 0.0069 |
| FAM173B          | 1.60 | 1.37E-03 | 0.0077 |
| ENST000002735412 | 1.60 | 1.24E-03 | 0.0073 |
| MAGOHB           | 1.60 | 4.74E-04 | 0.0044 |
| NUP188           | 1.60 | 5.68E-04 | 0.0048 |
| PIPSL            | 1.60 | 1.23E-02 | 0.0311 |
| ETFA             | 1.60 | 5.33E-04 | 0.0046 |
| ENST000003151444 | 1.60 | 5.36E-04 | 0.0046 |
| ENST000003409181 | 1.60 | 4.23E-04 | 0.0041 |
| XRCC5            | 1.60 | 9.86E-04 | 0.0064 |
| SLC19A2          | 1.60 | 1.76E-03 | 0.0089 |
| TAF5             | 1.60 | 4.30E-04 | 0.0041 |
| RPLP0            | 1.60 | 8.93E-05 | 0.0021 |

|                  |      |          |        |
|------------------|------|----------|--------|
| TSR3             | 1.59 | 2.17E-03 | 0.0100 |
| CCDC77           | 1.59 | 1.50E-03 | 0.0081 |
| SLC1A4           | 1.59 | 8.38E-03 | 0.0238 |
| DNTTIP1          | 1.59 | 1.38E-03 | 0.0077 |
| PGAP2            | 1.59 | 7.51E-03 | 0.0221 |
| ENST000002526224 | 1.59 | 1.85E-03 | 0.0091 |
| COPS3            | 1.59 | 6.49E-04 | 0.0051 |
| KIAA0319         | 1.59 | 1.50E-02 | 0.0357 |
| HDDC3            | 1.59 | 6.45E-04 | 0.0051 |
| ELOB             | 1.59 | 1.07E-03 | 0.0067 |
| ICA1L            | 1.59 | 4.90E-04 | 0.0044 |
| GPR137           | 1.59 | 1.26E-02 | 0.0316 |
| NUDT12           | 1.59 | 4.72E-03 | 0.0163 |
| OGFOD1           | 1.59 | 7.71E-04 | 0.0056 |
| EIF3C            | 1.59 | 2.30E-03 | 0.0104 |
| ZSCAN20          | 1.59 | 1.18E-03 | 0.0071 |
| NR1H3            | 1.59 | 1.77E-03 | 0.0089 |
| HMGB1P5          | 1.59 | 7.17E-03 | 0.0214 |
| THNSL1           | 1.59 | 7.56E-04 | 0.0055 |
| ABCE1            | 1.59 | 3.39E-04 | 0.0037 |
| ZNF826P          | 1.59 | 8.53E-04 | 0.0059 |
| GABPB1           | 1.59 | 3.62E-04 | 0.0038 |
| RPS19BP1         | 1.59 | 7.95E-04 | 0.0057 |
| HLA-K            | 1.59 | 1.90E-03 | 0.0093 |
| DEK              | 1.59 | 7.97E-04 | 0.0057 |
| NAXE             | 1.59 | 2.76E-03 | 0.0116 |
| TIMM8B           | 1.59 | 2.69E-03 | 0.0114 |
| THAP3            | 1.59 | 1.25E-03 | 0.0073 |
| ZNF219           | 1.59 | 3.94E-03 | 0.0144 |
| SLC25A1          | 1.59 | 9.04E-04 | 0.0061 |
| CSNK2B           | 1.59 | 3.65E-03 | 0.0137 |
| RBM10            | 1.59 | 5.96E-04 | 0.0049 |
| MCMBP            | 1.59 | 5.31E-04 | 0.0046 |
| NDUFAF2          | 1.58 | 7.47E-04 | 0.0055 |
| TMEM60           | 1.58 | 1.52E-03 | 0.0081 |
| RDM1             | 1.58 | 6.04E-03 | 0.0191 |
| HIST3H2A         | 1.58 | 3.89E-03 | 0.0143 |
| AL603756.1       | 1.58 | 5.10E-03 | 0.0171 |
| PLGRKT           | 1.58 | 6.26E-04 | 0.0050 |
| PLEKHF1          | 1.58 | 8.70E-04 | 0.0060 |
| ZSWIM3           | 1.58 | 3.34E-03 | 0.0130 |
| ACADS            | 1.58 | 7.31E-04 | 0.0055 |
| CDK6             | 1.58 | 1.93E-03 | 0.0094 |
| WDR5             | 1.58 | 5.92E-04 | 0.0049 |
| FBXW9            | 1.58 | 1.58E-03 | 0.0083 |
| GNB2             | 1.58 | 3.26E-04 | 0.0037 |
| ACTB             | 1.58 | 3.50E-04 | 0.0038 |

|                  |      |          |        |
|------------------|------|----------|--------|
| EMC6             | 1.58 | 2.49E-03 | 0.0109 |
| VRK1             | 1.58 | 5.66E-04 | 0.0048 |
| C16orf91         | 1.58 | 3.96E-03 | 0.0145 |
| MRPS9            | 1.57 | 6.47E-04 | 0.0051 |
| GLRX3            | 1.57 | 1.00E-03 | 0.0065 |
| KDELR2           | 1.57 | 2.73E-04 | 0.0034 |
| HSPA9            | 1.57 | 4.77E-04 | 0.0044 |
| ENST000003331672 | 1.57 | 9.99E-03 | 0.0267 |
| TOR4A            | 1.57 | 1.31E-02 | 0.0324 |
| PSMC2            | 1.57 | 8.86E-04 | 0.0060 |
| TELO2            | 1.57 | 1.67E-02 | 0.0385 |
| PINX1            | 1.57 | 1.51E-03 | 0.0081 |
| YWHAH            | 1.57 | 4.03E-04 | 0.0040 |
| CTNS             | 1.57 | 1.20E-03 | 0.0071 |
| AC009533.1       | 1.57 | 6.06E-04 | 0.0049 |
| MYC              | 1.57 | 1.23E-03 | 0.0073 |
| GOLPH3L          | 1.57 | 6.68E-04 | 0.0052 |
| CYB5B            | 1.57 | 2.72E-03 | 0.0115 |
| EIF5A            | 1.57 | 2.71E-03 | 0.0114 |
| UTP6             | 1.57 | 6.12E-04 | 0.0050 |
| ARMC1            | 1.57 | 3.71E-04 | 0.0039 |
| ENG              | 1.57 | 1.43E-02 | 0.0346 |
| NDUFA13          | 1.57 | 2.10E-03 | 0.0098 |
| FBXL6            | 1.57 | 1.64E-03 | 0.0085 |
| CTLA4            | 1.57 | 3.73E-03 | 0.0140 |
| DYRK4            | 1.57 | 4.86E-04 | 0.0044 |
| ADGRF3           | 1.57 | 2.08E-02 | 0.0452 |
| ENST000003301371 | 1.57 | 3.05E-03 | 0.0123 |
| PHETA2           | 1.57 | 4.33E-03 | 0.0154 |
| EFL1             | 1.57 | 9.88E-04 | 0.0064 |
| FAM129B          | 1.57 | 2.13E-03 | 0.0099 |
| NCL              | 1.57 | 1.88E-03 | 0.0092 |
| TXNL1            | 1.56 | 4.78E-04 | 0.0044 |
| HMGN2            | 1.56 | 1.18E-03 | 0.0070 |
| PPP1R26          | 1.56 | 5.16E-03 | 0.0172 |
| PXN-AS1          | 1.56 | 1.42E-02 | 0.0345 |
| HNRNPC           | 1.56 | 1.30E-04 | 0.0025 |
| ENST000002657532 | 1.56 | 1.16E-03 | 0.0070 |
| PRKCD            | 1.56 | 1.46E-03 | 0.0080 |
| MRPL21           | 1.56 | 1.37E-03 | 0.0077 |
| YEATS2           | 1.56 | 3.45E-04 | 0.0038 |
| TERC             | 1.56 | 4.64E-03 | 0.0161 |
| VPS35            | 1.56 | 4.59E-04 | 0.0043 |
| ZMPSTE24         | 1.56 | 2.45E-03 | 0.0108 |
| EIF4H            | 1.56 | 1.72E-04 | 0.0028 |
| ENST000003535480 | 1.56 | 1.16E-03 | 0.0070 |
| MMADHC           | 1.56 | 2.35E-04 | 0.0032 |

|                  |      |          |        |
|------------------|------|----------|--------|
| MYDGF            | 1.56 | 3.44E-04 | 0.0038 |
| PLP2             | 1.56 | 1.24E-03 | 0.0073 |
| UHRF1BP1         | 1.56 | 5.41E-04 | 0.0046 |
| NIT1             | 1.56 | 5.82E-04 | 0.0048 |
| HSD17B8          | 1.56 | 1.37E-03 | 0.0077 |
| FOXP4            | 1.56 | 4.92E-03 | 0.0167 |
| TIPRL            | 1.56 | 2.47E-04 | 0.0032 |
| SLC25A22         | 1.56 | 3.63E-03 | 0.0137 |
| LINC01146        | 1.56 | 2.06E-03 | 0.0097 |
| SEPHS2           | 1.56 | 2.64E-03 | 0.0113 |
| ATP1B1           | 1.56 | 8.58E-03 | 0.0241 |
| ATP5F1A          | 1.56 | 2.21E-04 | 0.0031 |
| C4orf33          | 1.56 | 4.28E-03 | 0.0153 |
| EEF1AKMT1        | 1.56 | 1.35E-03 | 0.0076 |
| CCDC137          | 1.56 | 1.20E-02 | 0.0304 |
| ANP32B           | 1.55 | 3.27E-04 | 0.0037 |
| WDYHV1           | 1.55 | 7.29E-04 | 0.0055 |
| MYO19            | 1.55 | 3.18E-04 | 0.0037 |
| C21orf59-TCP10L  | 1.55 | 7.50E-03 | 0.0221 |
| GPD2             | 1.55 | 2.45E-03 | 0.0108 |
| OTOF             | 1.55 | 1.41E-02 | 0.0343 |
| ILK              | 1.55 | 3.84E-04 | 0.0039 |
| PIGW             | 1.55 | 1.98E-02 | 0.0435 |
| CARS             | 1.55 | 3.24E-04 | 0.0037 |
| MID1             | 1.55 | 2.08E-02 | 0.0451 |
| ARHGEF12         | 1.55 | 6.51E-03 | 0.0200 |
| ARMCX3           | 1.55 | 3.63E-04 | 0.0038 |
| MAFG             | 1.55 | 2.05E-03 | 0.0097 |
| YBX3             | 1.55 | 1.08E-02 | 0.0283 |
| KYAT3            | 1.55 | 3.33E-04 | 0.0037 |
| LSM5             | 1.55 | 6.00E-04 | 0.0049 |
| KMT5A            | 1.55 | 1.11E-03 | 0.0068 |
| MRPS16           | 1.55 | 7.69E-04 | 0.0056 |
| ENST00000639674  | 1.55 | 3.75E-03 | 0.0140 |
| EIF3B            | 1.54 | 1.39E-03 | 0.0077 |
| EFTUD2           | 1.54 | 4.43E-04 | 0.0042 |
| DLAT             | 1.54 | 3.66E-04 | 0.0039 |
| SLC25A6          | 1.54 | 1.12E-03 | 0.0068 |
| SERPINB6         | 1.54 | 1.16E-03 | 0.0070 |
| ENST000003582960 | 1.54 | 4.79E-03 | 0.0164 |
| PSMC1            | 1.54 | 5.27E-04 | 0.0046 |
| NDUFS2           | 1.54 | 6.44E-04 | 0.0051 |
| KPNB1            | 1.54 | 2.08E-04 | 0.0030 |
| SNRPD2           | 1.54 | 2.77E-04 | 0.0034 |
| LINC00877        | 1.54 | 1.30E-02 | 0.0323 |
| POLR2E           | 1.54 | 6.17E-04 | 0.0050 |
| INSIG2           | 1.54 | 5.69E-03 | 0.0184 |

|                  |      |          |        |
|------------------|------|----------|--------|
| TEN1             | 1.54 | 1.38E-02 | 0.0336 |
| USP5             | 1.54 | 4.78E-04 | 0.0044 |
| ZMYND19          | 1.54 | 2.27E-03 | 0.0103 |
| ENST000002912953 | 1.54 | 1.50E-03 | 0.0081 |
| ENST000002859680 | 1.54 | 2.06E-04 | 0.0030 |
| FANCC            | 1.54 | 8.19E-04 | 0.0058 |
| ITGAE            | 1.54 | 1.44E-03 | 0.0079 |
| ERF              | 1.54 | 2.72E-03 | 0.0115 |
| PPIA             | 1.54 | 9.78E-04 | 0.0064 |
| NIP7             | 1.54 | 2.13E-03 | 0.0099 |
| TMEM256          | 1.54 | 7.18E-04 | 0.0054 |
| DHRS4            | 1.54 | 7.76E-03 | 0.0226 |
| DRG1             | 1.54 | 6.67E-04 | 0.0052 |
| NOP2             | 1.54 | 1.25E-03 | 0.0073 |
| SLC31A2          | 1.53 | 1.54E-03 | 0.0082 |
| SPHK2            | 1.53 | 6.77E-03 | 0.0206 |
| TUBA4A           | 1.53 | 2.21E-03 | 0.0101 |
| ENST000003602400 | 1.53 | 2.34E-02 | 0.0491 |
| OLA1             | 1.53 | 2.84E-04 | 0.0035 |
| ADCY3            | 1.53 | 5.08E-04 | 0.0045 |
| ENST000002925771 | 1.53 | 1.03E-03 | 0.0066 |
| ENST000003068230 | 1.53 | 2.04E-03 | 0.0096 |
| IFT140           | 1.53 | 1.35E-03 | 0.0076 |
| RAVER1           | 1.53 | 2.72E-03 | 0.0115 |
| NAT10            | 1.53 | 6.60E-04 | 0.0052 |
| ENST000003134331 | 1.53 | 7.89E-03 | 0.0229 |
| MLST8            | 1.53 | 1.12E-03 | 0.0068 |
| PSMA7            | 1.53 | 1.69E-03 | 0.0087 |
| POLH             | 1.53 | 5.22E-04 | 0.0045 |
| MPHOSPH6         | 1.53 | 1.73E-03 | 0.0088 |
| BCS1L            | 1.53 | 5.71E-04 | 0.0048 |
| STYXL1           | 1.53 | 8.85E-03 | 0.0246 |
| NUDT22           | 1.53 | 6.36E-04 | 0.0051 |
| HMGCR            | 1.53 | 3.41E-04 | 0.0037 |
| RRNAD1           | 1.53 | 2.03E-03 | 0.0096 |
| USP1             | 1.53 | 1.02E-03 | 0.0065 |
| CDK3             | 1.53 | 2.13E-02 | 0.0458 |
| LSM3             | 1.53 | 1.71E-03 | 0.0087 |
| MFSD14B          | 1.53 | 1.17E-03 | 0.0070 |
| GLRX5            | 1.53 | 2.30E-03 | 0.0103 |
| NDRG4            | 1.53 | 2.21E-02 | 0.0471 |
| ENST000002525060 | 1.52 | 1.89E-02 | 0.0422 |
| IFIT1            | 1.52 | 1.36E-02 | 0.0334 |
| RECQL            | 1.52 | 5.22E-04 | 0.0045 |
| ENST000003274350 | 1.52 | 4.12E-03 | 0.0149 |
| TTC7A            | 1.52 | 1.23E-03 | 0.0072 |
| MT-ND6           | 1.52 | 9.20E-03 | 0.0253 |

|                  |      |          |        |
|------------------|------|----------|--------|
| ENST00000535810  | 1.52 | 3.91E-03 | 0.0144 |
| RRAGD            | 1.52 | 8.05E-04 | 0.0057 |
| USP44            | 1.52 | 1.47E-03 | 0.0080 |
| TMEM258          | 1.52 | 5.21E-04 | 0.0045 |
| IFI16            | 1.52 | 8.84E-04 | 0.0060 |
| CD40LG           | 1.52 | 2.22E-03 | 0.0101 |
| CHD1L            | 1.52 | 7.78E-04 | 0.0056 |
| MPP1             | 1.52 | 2.29E-02 | 0.0483 |
| AC009159.3       | 1.52 | 1.17E-02 | 0.0298 |
| AC090527.2       | 1.52 | 6.75E-03 | 0.0206 |
| TRMT112          | 1.52 | 9.62E-03 | 0.0261 |
| PDIA4            | 1.52 | 2.95E-04 | 0.0035 |
| ACADVL           | 1.52 | 4.28E-04 | 0.0041 |
| EML5             | 1.52 | 3.18E-04 | 0.0037 |
| MTHFS            | 1.52 | 1.35E-03 | 0.0076 |
| LEO1             | 1.52 | 9.64E-04 | 0.0063 |
| AVEN             | 1.52 | 5.25E-03 | 0.0174 |
| JAML             | 1.52 | 5.88E-04 | 0.0049 |
| SPATS2L          | 1.51 | 4.33E-03 | 0.0154 |
| MYB              | 1.51 | 6.30E-03 | 0.0196 |
| ACYP1            | 1.51 | 5.70E-04 | 0.0048 |
| UCHL5            | 1.51 | 3.24E-04 | 0.0037 |
| NLE1             | 1.51 | 8.13E-04 | 0.0057 |
| ATP5IF1          | 1.51 | 3.70E-04 | 0.0039 |
| ZNF215           | 1.51 | 3.39E-03 | 0.0131 |
| BMS1             | 1.51 | 9.58E-04 | 0.0063 |
| NFKBIB           | 1.51 | 1.75E-03 | 0.0088 |
| C17orf75         | 1.51 | 4.67E-04 | 0.0043 |
| TMEM214          | 1.51 | 3.94E-03 | 0.0144 |
| FDFT1            | 1.51 | 3.77E-04 | 0.0039 |
| NUDT2            | 1.51 | 8.29E-04 | 0.0058 |
| KIF1BP           | 1.51 | 4.26E-04 | 0.0041 |
| ENST000003225350 | 1.51 | 2.70E-03 | 0.0114 |
| FAM167A          | 1.51 | 1.06E-02 | 0.0279 |
| GHITM            | 1.51 | 1.12E-03 | 0.0068 |
| AL031985.3       | 1.51 | 5.44E-03 | 0.0178 |
| SCAT1            | 1.51 | 1.54E-02 | 0.0363 |
| BLOC1S1          | 1.51 | 9.11E-04 | 0.0061 |
| IDH3A            | 1.51 | 5.76E-04 | 0.0048 |
| RFTN1            | 1.51 | 3.02E-04 | 0.0036 |
| GPSM1            | 1.51 | 1.39E-03 | 0.0077 |
| NDUFA11          | 1.51 | 3.18E-03 | 0.0126 |
| DOK1             | 1.51 | 1.69E-03 | 0.0087 |
| STARD7           | 1.51 | 5.41E-04 | 0.0046 |
| ENST000003155672 | 1.50 | 6.21E-03 | 0.0194 |
| C14orf119        | 1.50 | 4.00E-04 | 0.0040 |
| VDAC2            | 1.50 | 3.45E-04 | 0.0038 |

|                  |      |          |        |
|------------------|------|----------|--------|
| EDEM1            | 1.50 | 1.02E-03 | 0.0065 |
| ENST000003212330 | 1.50 | 1.20E-02 | 0.0305 |
| ADM2             | 1.50 | 8.42E-03 | 0.0238 |
| PSMB7            | 1.50 | 8.74E-04 | 0.0060 |
| ASNA1            | 1.50 | 3.30E-03 | 0.0129 |
| GMPPA            | 1.50 | 2.54E-03 | 0.0110 |
| BEND3            | 1.50 | 4.18E-03 | 0.0150 |
| PPP1CC           | 1.50 | 6.51E-04 | 0.0051 |
| GRN              | 1.50 | 3.92E-03 | 0.0144 |
| NOC2L            | 1.50 | 1.30E-03 | 0.0074 |
| DTD1             | 1.50 | 1.38E-03 | 0.0077 |
| RRP12            | 1.50 | 2.99E-03 | 0.0121 |
| RPP38            | 1.50 | 8.19E-04 | 0.0058 |
| TOR3A            | 1.50 | 1.14E-03 | 0.0069 |
| ENST000002994020 | 1.50 | 5.61E-03 | 0.0182 |
| GRINA            | 1.50 | 1.53E-02 | 0.0363 |
| ARV1             | 1.50 | 7.91E-04 | 0.0057 |
| TOMM6            | 1.50 | 4.27E-03 | 0.0152 |
| ENST000003260050 | 1.50 | 1.01E-03 | 0.0065 |
| INTS13           | 1.50 | 4.78E-04 | 0.0044 |
| TTF2             | 1.50 | 3.07E-04 | 0.0036 |
| RBBP9            | 1.50 | 5.16E-04 | 0.0045 |
| GNPAT            | 1.50 | 3.43E-04 | 0.0038 |
| ENST000002823440 | 1.50 | 2.71E-04 | 0.0034 |
| ENST000003589010 | 1.50 | 1.68E-03 | 0.0086 |
| CCND2            | 1.49 | 2.49E-04 | 0.0033 |
| ENST000003252120 | 1.49 | 3.13E-04 | 0.0036 |
| ATF4             | 1.49 | 6.42E-04 | 0.0051 |
| DDIT4            | 1.49 | 3.31E-04 | 0.0037 |
| PFAS             | 1.49 | 3.25E-03 | 0.0128 |
| ITSN1            | 1.49 | 4.99E-03 | 0.0168 |
| ENST000003152862 | 1.49 | 9.88E-04 | 0.0064 |
| KARS             | 1.49 | 2.91E-04 | 0.0035 |
| VDAC3            | 1.49 | 2.62E-04 | 0.0033 |
| SNRPC            | 1.49 | 2.10E-03 | 0.0098 |
| RYBP             | 1.49 | 1.27E-03 | 0.0074 |
| BCKDHA           | 1.49 | 8.44E-04 | 0.0059 |
| FOXP3            | 1.49 | 5.80E-03 | 0.0186 |
| ENST000003370180 | 1.49 | 4.34E-04 | 0.0042 |
| SIRT6            | 1.49 | 2.10E-03 | 0.0098 |
| ELOVL6           | 1.49 | 1.92E-03 | 0.0093 |
| ENST000002891750 | 1.49 | 1.54E-02 | 0.0364 |
| NDUFC2           | 1.49 | 4.66E-04 | 0.0043 |
| AC004847.1       | 1.49 | 1.56E-02 | 0.0367 |
| TCOF1            | 1.49 | 9.71E-04 | 0.0064 |
| PHF13            | 1.49 | 8.24E-03 | 0.0235 |
| VSIG10           | 1.49 | 1.75E-03 | 0.0089 |

|                  |      |          |        |
|------------------|------|----------|--------|
| MRPL10           | 1.49 | 1.90E-03 | 0.0093 |
| TNPO2            | 1.49 | 4.30E-04 | 0.0041 |
| RNF121           | 1.49 | 6.90E-04 | 0.0053 |
| PPP1R16A         | 1.49 | 1.80E-03 | 0.0090 |
| PCMT1            | 1.49 | 5.25E-04 | 0.0046 |
| NOP14            | 1.48 | 6.27E-04 | 0.0050 |
| MRPS36           | 1.48 | 4.76E-04 | 0.0044 |
| KPTN             | 1.48 | 8.00E-03 | 0.0231 |
| ENST000002939710 | 1.48 | 4.39E-03 | 0.0155 |
| ENST000003273001 | 1.48 | 3.84E-03 | 0.0142 |
| COASY            | 1.48 | 3.26E-03 | 0.0128 |
| AC105339.2       | 1.48 | 1.13E-03 | 0.0069 |
| ENST000003378590 | 1.48 | 5.06E-04 | 0.0045 |
| ABCB7            | 1.48 | 1.49E-03 | 0.0081 |
| ERLIN1           | 1.48 | 7.65E-04 | 0.0056 |
| TMEM237          | 1.48 | 2.65E-03 | 0.0113 |
| SLC27A4          | 1.48 | 8.46E-03 | 0.0239 |
| HSPA5            | 1.48 | 3.47E-03 | 0.0133 |
| CEP19            | 1.48 | 3.01E-03 | 0.0122 |
| SV2A             | 1.48 | 1.31E-02 | 0.0324 |
| CLTC             | 1.48 | 7.35E-04 | 0.0055 |
| ACSS2            | 1.48 | 3.72E-03 | 0.0140 |
| SERTAD1          | 1.48 | 3.59E-03 | 0.0136 |
| FARP2            | 1.48 | 4.46E-03 | 0.0156 |
| PRPF19           | 1.48 | 1.96E-03 | 0.0094 |
| ENST000002924940 | 1.48 | 4.11E-03 | 0.0149 |
| ENST000003220302 | 1.48 | 7.07E-04 | 0.0054 |
| ENST000003146160 | 1.47 | 6.44E-04 | 0.0051 |
| ENST000003106141 | 1.47 | 2.52E-03 | 0.0110 |
| AZIN1-AS1        | 1.47 | 3.24E-03 | 0.0127 |
| SLC16A3          | 1.47 | 5.32E-04 | 0.0046 |
| SNORA80D         | 1.47 | 2.30E-02 | 0.0484 |
| ENST000002511011 | 1.47 | 2.21E-03 | 0.0101 |
| GTF2A2           | 1.47 | 2.59E-03 | 0.0111 |
| ZNF146           | 1.47 | 2.46E-04 | 0.0032 |
| SFR1             | 1.47 | 1.92E-03 | 0.0093 |
| ACTN4            | 1.47 | 9.15E-04 | 0.0062 |
| MLF2             | 1.47 | 4.20E-04 | 0.0041 |
| IFI44            | 1.47 | 1.74E-02 | 0.0398 |
| SETD9            | 1.47 | 5.47E-03 | 0.0179 |
| SMIM13           | 1.47 | 3.67E-03 | 0.0138 |
| ENST000002446702 | 1.47 | 2.28E-02 | 0.0481 |
| DNAJC25          | 1.47 | 8.58E-04 | 0.0059 |
| SYNGR2           | 1.47 | 1.68E-03 | 0.0086 |
| NIF3L1           | 1.47 | 6.62E-04 | 0.0052 |
| NDUFB5           | 1.47 | 6.77E-04 | 0.0052 |
| AC024060.1       | 1.46 | 4.51E-03 | 0.0157 |



|                  |      |          |        |
|------------------|------|----------|--------|
| AC026401.3       | 1.46 | 1.98E-03 | 0.0095 |
| AC243742.3       | 1.46 | 1.98E-03 | 0.0095 |
| AP3S1            | 1.46 | 3.81E-04 | 0.0039 |
| RPN1             | 1.46 | 3.80E-04 | 0.0039 |
| DDX49            | 1.46 | 3.61E-03 | 0.0137 |
| NUFIP1           | 1.46 | 1.35E-03 | 0.0076 |
| YES1             | 1.46 | 7.54E-03 | 0.0222 |
| CHID1            | 1.46 | 7.47E-04 | 0.0055 |
| MT1X             | 1.46 | 2.64E-03 | 0.0113 |
| RNF219           | 1.46 | 4.08E-04 | 0.0041 |
| RAB13            | 1.46 | 1.83E-02 | 0.0412 |
| PIGV             | 1.46 | 1.52E-03 | 0.0082 |
| ZFP69B           | 1.46 | 3.13E-03 | 0.0125 |
| PSME3            | 1.46 | 8.66E-04 | 0.0060 |
| GFM2             | 1.46 | 1.04E-03 | 0.0066 |
| TMEM109          | 1.46 | 5.57E-03 | 0.0181 |
| RAPGEFL1         | 1.46 | 2.04E-02 | 0.0445 |
| QDPR             | 1.46 | 2.64E-03 | 0.0113 |
| GATM             | 1.46 | 3.74E-03 | 0.0140 |
| BBS7             | 1.46 | 2.09E-03 | 0.0098 |
| SINHCAF          | 1.46 | 2.64E-04 | 0.0034 |
| NARS             | 1.46 | 3.99E-04 | 0.0040 |
| ENST000002631211 | 1.46 | 1.65E-02 | 0.0381 |
| TACC3            | 1.45 | 2.67E-03 | 0.0113 |
| ENST000003206761 | 1.45 | 9.29E-04 | 0.0062 |
| SNAPC4           | 1.45 | 1.57E-03 | 0.0083 |
| NDUFAF4          | 1.45 | 2.06E-03 | 0.0097 |
| PPP1R16B         | 1.45 | 4.79E-04 | 0.0044 |
| GCA              | 1.45 | 7.71E-04 | 0.0056 |
| EIF5B            | 1.45 | 6.64E-04 | 0.0052 |
| UNC45A           | 1.45 | 3.94E-04 | 0.0040 |
| UBE2Z            | 1.45 | 5.33E-04 | 0.0046 |
| NDUFB11          | 1.45 | 1.50E-03 | 0.0081 |
| TBCE             | 1.45 | 1.93E-03 | 0.0094 |
| SAMD1            | 1.45 | 1.73E-02 | 0.0396 |
| S100A13          | 1.45 | 8.14E-03 | 0.0233 |
| ZNF710           | 1.45 | 1.11E-03 | 0.0068 |
| AC009133.1       | 1.45 | 1.51E-02 | 0.0359 |
| SNRNP40          | 1.45 | 1.32E-03 | 0.0075 |
| LINC00471        | 1.45 | 2.76E-03 | 0.0116 |
| WRB              | 1.45 | 2.58E-03 | 0.0111 |
| ABRACL           | 1.45 | 2.30E-03 | 0.0104 |
| IER3IP1          | 1.45 | 7.91E-04 | 0.0057 |
| PALB2            | 1.45 | 4.16E-04 | 0.0041 |
| TADA2A           | 1.45 | 1.54E-03 | 0.0082 |
| TNNC1            | 1.45 | 8.13E-03 | 0.0233 |
| FAM136A          | 1.45 | 4.77E-04 | 0.0044 |

|                  |      |          |        |
|------------------|------|----------|--------|
| ENST000002988182 | 1.45 | 1.78E-03 | 0.0089 |
| SUMO1            | 1.45 | 7.14E-04 | 0.0054 |
| MBOAT7           | 1.44 | 1.56E-03 | 0.0083 |
| ATP1B3           | 1.44 | 3.28E-03 | 0.0128 |
| DOT1L            | 1.44 | 2.24E-03 | 0.0102 |
| RRAS             | 1.44 | 1.15E-02 | 0.0296 |
| RARS             | 1.44 | 1.90E-03 | 0.0093 |
| CCDC25           | 1.44 | 4.87E-04 | 0.0044 |
| SND1             | 1.44 | 2.99E-04 | 0.0035 |
| MAP2K1           | 1.44 | 3.32E-04 | 0.0037 |
| APRT             | 1.44 | 1.63E-03 | 0.0085 |
| GRPEL1           | 1.44 | 9.19E-04 | 0.0062 |
| ENST000002632024 | 1.44 | 1.30E-03 | 0.0074 |
| GTF2H3           | 1.44 | 9.36E-04 | 0.0062 |
| PREB             | 1.44 | 1.10E-03 | 0.0068 |
| CSNK2A1          | 1.44 | 2.72E-04 | 0.0034 |
| TSPAN3           | 1.44 | 3.26E-03 | 0.0128 |
| CMSS1            | 1.44 | 1.58E-03 | 0.0083 |
| ENST000003449890 | 1.44 | 1.19E-03 | 0.0071 |
| ARMC10           | 1.44 | 2.58E-03 | 0.0111 |
| FANCM            | 1.44 | 3.68E-04 | 0.0039 |
| CHAMP1           | 1.44 | 2.80E-03 | 0.0116 |
| ENST000002902163 | 1.44 | 1.33E-02 | 0.0328 |
| CRAT             | 1.44 | 1.01E-02 | 0.0269 |
| ULBP1            | 1.43 | 2.24E-02 | 0.0476 |
| SUPT4H1          | 1.43 | 8.61E-04 | 0.0059 |
| ADAM8            | 1.43 | 1.08E-02 | 0.0283 |
| ENST000002204292 | 1.43 | 2.68E-03 | 0.0114 |
| STK32C           | 1.43 | 1.44E-03 | 0.0079 |
| ZNF93            | 1.43 | 3.04E-03 | 0.0122 |
| CHD4             | 1.43 | 4.49E-04 | 0.0042 |
| ENST000003108640 | 1.43 | 6.56E-04 | 0.0051 |
| ARHGEF5          | 1.43 | 3.68E-03 | 0.0138 |
| U2AF2            | 1.43 | 7.36E-04 | 0.0055 |
| CCDC127          | 1.43 | 1.06E-03 | 0.0066 |
| SELENOH          | 1.43 | 9.57E-04 | 0.0063 |
| URB2             | 1.43 | 3.99E-03 | 0.0146 |
| C19orf70         | 1.43 | 1.10E-03 | 0.0068 |
| RMND1            | 1.43 | 2.50E-03 | 0.0109 |
| GYS1             | 1.43 | 2.96E-03 | 0.0121 |
| THUMPD3          | 1.43 | 5.07E-04 | 0.0045 |
| ENST000002648180 | 1.43 | 2.28E-02 | 0.0481 |
| AC083899.1       | 1.43 | 1.78E-03 | 0.0089 |
| PAQR7            | 1.43 | 5.58E-03 | 0.0181 |
| AURKAIP1         | 1.43 | 5.13E-03 | 0.0171 |
| TSPO             | 1.43 | 5.78E-03 | 0.0186 |
| RNF19A           | 1.43 | 8.02E-04 | 0.0057 |

|                  |      |          |        |
|------------------|------|----------|--------|
| ITPA             | 1.43 | 2.46E-03 | 0.0108 |
| ENST000001636781 | 1.43 | 3.41E-03 | 0.0131 |
| NFKB2            | 1.43 | 6.00E-04 | 0.0049 |
| COMT             | 1.43 | 2.85E-03 | 0.0118 |
| CYCS             | 1.43 | 1.59E-03 | 0.0083 |
| PPFIBP1          | 1.43 | 4.25E-03 | 0.0152 |
| ENST000003433881 | 1.43 | 6.32E-03 | 0.0196 |
| RRAGC            | 1.42 | 5.17E-04 | 0.0045 |
| RAB8A            | 1.42 | 7.83E-04 | 0.0056 |
| C12orf73         | 1.42 | 3.72E-03 | 0.0140 |
| KATNB1           | 1.42 | 1.61E-03 | 0.0084 |
| LRRC75A-AS1      | 1.42 | 3.90E-04 | 0.0040 |
| INPP1            | 1.42 | 1.50E-03 | 0.0081 |
| SRSF1            | 1.42 | 1.47E-03 | 0.0080 |
| LINC00884        | 1.42 | 1.01E-02 | 0.0270 |
| FP236241.1       | 1.42 | 1.92E-02 | 0.0427 |
| ITGB1BP1         | 1.42 | 9.30E-04 | 0.0062 |
| HAUS7            | 1.42 | 9.89E-04 | 0.0064 |
| SNX11            | 1.42 | 1.96E-03 | 0.0094 |
| TFR2             | 1.42 | 2.43E-03 | 0.0107 |
| FAAP24           | 1.42 | 1.13E-03 | 0.0069 |
| AL442125.1       | 1.42 | 1.88E-02 | 0.0419 |
| BARX2            | 1.42 | 1.49E-02 | 0.0355 |
| CARD19           | 1.42 | 2.09E-03 | 0.0098 |
| PRADC1           | 1.42 | 2.25E-02 | 0.0477 |
| ATP13A3          | 1.42 | 3.04E-04 | 0.0036 |
| AC091982.3       | 1.42 | 1.03E-02 | 0.0274 |
| AKR7A2           | 1.42 | 6.94E-04 | 0.0053 |
| PPP1R12A-AS1     | 1.42 | 2.37E-02 | 0.0496 |
| HSPA14           | 1.42 | 1.04E-03 | 0.0066 |
| MKLN1-AS         | 1.42 | 8.33E-03 | 0.0237 |
| DIMT1            | 1.42 | 4.59E-04 | 0.0043 |
| AP2S1            | 1.42 | 2.29E-03 | 0.0103 |
| RAB5IF           | 1.42 | 4.77E-03 | 0.0164 |
| HIST1H3A         | 1.42 | 1.43E-03 | 0.0079 |
| HNRNPA1P48       | 1.42 | 1.14E-02 | 0.0293 |
| SLC35A2          | 1.42 | 3.37E-03 | 0.0131 |
| ZBTB17           | 1.42 | 6.68E-04 | 0.0052 |
| NMT1             | 1.42 | 5.75E-04 | 0.0048 |
| SPTSSA           | 1.42 | 1.93E-03 | 0.0094 |
| PTPA             | 1.42 | 6.47E-04 | 0.0051 |
| AL160314.2       | 1.42 | 1.81E-02 | 0.0409 |
| ENST000003557650 | 1.42 | 1.71E-03 | 0.0087 |
| HNRNPA1P10       | 1.42 | 1.68E-02 | 0.0388 |
| MCMDC2           | 1.42 | 7.51E-03 | 0.0221 |
| USP37            | 1.42 | 4.94E-04 | 0.0044 |
| URB1             | 1.41 | 4.19E-04 | 0.0041 |

|                  |      |          |        |
|------------------|------|----------|--------|
| PRKACA           | 1.41 | 1.73E-03 | 0.0088 |
| APEX2            | 1.41 | 2.01E-03 | 0.0096 |
| IER5             | 1.41 | 5.37E-04 | 0.0046 |
| HIST1H1E         | 1.41 | 3.48E-04 | 0.0038 |
| SHPK             | 1.41 | 1.73E-03 | 0.0088 |
| ENST000002660871 | 1.41 | 7.34E-04 | 0.0055 |
| AC108134.2       | 1.41 | 9.10E-03 | 0.0252 |
| ENST000002688930 | 1.41 | 3.90E-03 | 0.0143 |
| ABHD11           | 1.41 | 7.41E-03 | 0.0219 |
| ENST000002730640 | 1.41 | 9.45E-04 | 0.0063 |
| TFAM             | 1.41 | 2.16E-03 | 0.0099 |
| ZNRD1            | 1.41 | 5.79E-04 | 0.0048 |
| AKAP2            | 1.41 | 9.17E-04 | 0.0062 |
| SMARCB1          | 1.41 | 7.36E-04 | 0.0055 |
| SNAPIN           | 1.41 | 7.93E-03 | 0.0229 |
| FAHD2A           | 1.41 | 1.66E-03 | 0.0086 |
| NIPA2            | 1.41 | 2.55E-03 | 0.0111 |
| SLC38A2          | 1.41 | 8.98E-04 | 0.0061 |
| AC015813.2       | 1.41 | 3.25E-03 | 0.0128 |
| AP1B1            | 1.41 | 1.62E-03 | 0.0085 |
| HIST1H4E         | 1.41 | 5.81E-04 | 0.0048 |
| SDHAF3           | 1.41 | 9.80E-04 | 0.0064 |
| RHBDD3           | 1.40 | 2.19E-03 | 0.0100 |
| KSR1             | 1.40 | 1.42E-02 | 0.0344 |
| FERMT3           | 1.40 | 4.53E-04 | 0.0043 |
| NXT1             | 1.40 | 2.22E-03 | 0.0101 |
| ZNF598           | 1.40 | 1.12E-03 | 0.0068 |
| ACACA            | 1.40 | 7.80E-04 | 0.0056 |
| VCP              | 1.40 | 8.96E-04 | 0.0061 |
| POLE             | 1.40 | 6.15E-03 | 0.0193 |
| SCRIB            | 1.40 | 5.81E-03 | 0.0186 |
| PPCDC            | 1.40 | 1.36E-03 | 0.0076 |
| ACSL3            | 1.40 | 7.61E-04 | 0.0056 |
| SUCLA2           | 1.40 | 9.57E-04 | 0.0063 |
| ENST000003328580 | 1.40 | 7.34E-03 | 0.0217 |
| CDC34            | 1.40 | 1.82E-03 | 0.0091 |
| ENST000003323450 | 1.40 | 1.31E-02 | 0.0324 |
| RBCK1            | 1.40 | 2.86E-03 | 0.0118 |
| DAZAP1           | 1.40 | 6.63E-04 | 0.0052 |
| TNKS1BP1         | 1.40 | 4.90E-03 | 0.0166 |
| UMPS             | 1.40 | 1.70E-03 | 0.0087 |
| IQCG             | 1.40 | 1.45E-03 | 0.0079 |
| ASMTL            | 1.40 | 2.89E-03 | 0.0119 |
| HAUS2            | 1.40 | 1.50E-03 | 0.0081 |
| CTNNA1           | 1.40 | 1.17E-03 | 0.0070 |
| APOL1            | 1.39 | 1.08E-03 | 0.0067 |
| JRKL             | 1.39 | 1.06E-03 | 0.0067 |

|                  |      |          |        |
|------------------|------|----------|--------|
| RCC1L            | 1.39 | 2.38E-03 | 0.0106 |
| TMEM192          | 1.39 | 5.79E-03 | 0.0186 |
| FSD1             | 1.39 | 1.21E-02 | 0.0307 |
| PTRH2            | 1.39 | 7.34E-04 | 0.0055 |
| CYB5A            | 1.39 | 6.71E-03 | 0.0205 |
| TCAF1P1          | 1.39 | 7.43E-03 | 0.0219 |
| CETN4P           | 1.39 | 1.68E-02 | 0.0388 |
| NIPAL1           | 1.39 | 2.11E-03 | 0.0098 |
| TADA3            | 1.39 | 6.04E-03 | 0.0191 |
| ENST000003077120 | 1.39 | 1.79E-03 | 0.0090 |
| B4GAT1           | 1.39 | 3.76E-03 | 0.0140 |
| APEH             | 1.39 | 4.72E-04 | 0.0044 |
| DNAAF2           | 1.39 | 6.52E-03 | 0.0201 |
| CRNDE            | 1.39 | 5.58E-03 | 0.0181 |
| GTF2H2C_2        | 1.39 | 2.51E-03 | 0.0110 |
| ENST000002964141 | 1.39 | 2.26E-03 | 0.0102 |
| PRMT3            | 1.39 | 1.57E-03 | 0.0083 |
| RABEPK           | 1.39 | 4.19E-03 | 0.0150 |
| IRAK1            | 1.39 | 3.14E-03 | 0.0125 |
| DCAF12           | 1.39 | 5.83E-04 | 0.0048 |
| E2F6             | 1.38 | 1.90E-03 | 0.0093 |
| ENST00000636126  | 1.38 | 1.74E-02 | 0.0398 |
| FRMD4B           | 1.38 | 1.15E-03 | 0.0070 |
| AC243587.1       | 1.38 | 9.00E-03 | 0.0249 |
| HMG2P5           | 1.38 | 9.00E-03 | 0.0249 |
| ARF6             | 1.38 | 6.21E-04 | 0.0050 |
| PSMB9            | 1.38 | 1.35E-03 | 0.0076 |
| OXSM             | 1.38 | 1.19E-03 | 0.0071 |
| GTF2F1           | 1.38 | 5.83E-04 | 0.0048 |
| GPR171           | 1.38 | 4.53E-04 | 0.0043 |
| PRPF31           | 1.38 | 6.84E-03 | 0.0207 |
| SRP72            | 1.38 | 4.82E-04 | 0.0044 |
| DCTD             | 1.38 | 1.02E-03 | 0.0065 |
| TEX30            | 1.38 | 4.19E-03 | 0.0151 |
| FBLN7            | 1.38 | 1.35E-02 | 0.0331 |
| AC040970.1       | 1.38 | 1.84E-02 | 0.0415 |
| ENST000003055700 | 1.38 | 5.49E-03 | 0.0179 |
| RPL13P5          | 1.38 | 5.90E-03 | 0.0188 |
| CD320            | 1.38 | 8.05E-03 | 0.0231 |
| LENG9            | 1.38 | 7.85E-03 | 0.0228 |
| CAMSAP1          | 1.38 | 5.74E-04 | 0.0048 |
| MRPL53           | 1.38 | 1.09E-03 | 0.0067 |
| LARP1            | 1.38 | 6.56E-04 | 0.0051 |
| NARS2            | 1.38 | 1.05E-03 | 0.0066 |
| AC004241.1       | 1.37 | 2.28E-02 | 0.0481 |
| ACSL1            | 1.37 | 1.25E-03 | 0.0073 |
| CCDC152          | 1.37 | 7.09E-03 | 0.0212 |

|                  |      |          |        |
|------------------|------|----------|--------|
| SLFN11           | 1.37 | 7.97E-04 | 0.0057 |
| GGT1             | 1.37 | 1.26E-02 | 0.0317 |
| RIOK1            | 1.37 | 1.42E-03 | 0.0078 |
| HMGCL            | 1.37 | 1.02E-03 | 0.0065 |
| RPP30            | 1.37 | 9.46E-04 | 0.0063 |
| UBA2             | 1.37 | 7.23E-04 | 0.0054 |
| PERP             | 1.37 | 7.64E-03 | 0.0223 |
| PSMG2            | 1.37 | 5.86E-04 | 0.0048 |
| HIKESHI          | 1.37 | 1.20E-03 | 0.0072 |
| BPGM             | 1.37 | 2.29E-03 | 0.0103 |
| PHF23            | 1.37 | 1.32E-03 | 0.0075 |
| ENST000003359720 | 1.37 | 1.15E-02 | 0.0296 |
| RPIA             | 1.37 | 1.64E-03 | 0.0085 |
| ENST000002686680 | 1.37 | 7.71E-04 | 0.0056 |
| SCYL1            | 1.37 | 9.34E-04 | 0.0062 |
| NAB1             | 1.37 | 7.47E-04 | 0.0055 |
| SERPINB1         | 1.37 | 2.12E-02 | 0.0458 |
| GNA11            | 1.37 | 3.04E-03 | 0.0122 |
| CXCL8            | 1.37 | 1.39E-02 | 0.0338 |
| AHI1             | 1.37 | 2.07E-03 | 0.0097 |
| ENST000002120150 | 1.37 | 6.87E-03 | 0.0208 |
| ST20             | 1.37 | 1.02E-02 | 0.0272 |
| SF3B5            | 1.37 | 8.78E-04 | 0.0060 |
| SLC9A7           | 1.37 | 2.64E-03 | 0.0113 |
| RAB8B            | 1.37 | 1.06E-03 | 0.0067 |
| SNF8             | 1.37 | 2.98E-03 | 0.0121 |
| ENST000002634610 | 1.37 | 1.90E-03 | 0.0093 |
| HEMK1            | 1.37 | 5.11E-04 | 0.0045 |
| ENST000003248711 | 1.37 | 2.30E-02 | 0.0485 |
| PHYH             | 1.37 | 1.98E-03 | 0.0095 |
| GPR108           | 1.37 | 2.50E-03 | 0.0109 |
| MPV17L2          | 1.36 | 1.48E-02 | 0.0354 |
| COMMD8           | 1.36 | 3.17E-03 | 0.0126 |
| ARPC1B           | 1.36 | 9.52E-04 | 0.0063 |
| CALR             | 1.36 | 1.29E-03 | 0.0074 |
| ENST000003115021 | 1.36 | 4.56E-03 | 0.0159 |
| MRPS24           | 1.36 | 7.06E-04 | 0.0054 |
| FASTKD1          | 1.36 | 6.07E-04 | 0.0049 |
| MTMR2            | 1.36 | 1.09E-03 | 0.0067 |
| METTL26          | 1.36 | 2.30E-02 | 0.0484 |
| TTF1             | 1.36 | 4.85E-04 | 0.0044 |
| MTBP             | 1.36 | 7.30E-04 | 0.0055 |
| TBRG4            | 1.36 | 1.08E-03 | 0.0067 |
| NT5C3B           | 1.36 | 4.16E-03 | 0.0150 |
| AC002310.1       | 1.36 | 4.43E-03 | 0.0156 |
| PLEKHO2          | 1.36 | 3.23E-03 | 0.0127 |
| SPACA6           | 1.36 | 5.07E-03 | 0.0170 |

|                  |      |          |        |
|------------------|------|----------|--------|
| SSNA1            | 1.36 | 4.46E-03 | 0.0156 |
| C19orf24         | 1.36 | 1.16E-02 | 0.0298 |
| LIPE             | 1.36 | 1.68E-02 | 0.0387 |
| TIMMDC1          | 1.36 | 1.98E-03 | 0.0095 |
| NAA15            | 1.36 | 8.28E-04 | 0.0058 |
| PMEPA1           | 1.36 | 1.49E-02 | 0.0355 |
| MRM2             | 1.35 | 5.48E-03 | 0.0179 |
| LARP1B           | 1.35 | 5.46E-04 | 0.0046 |
| MRPS27           | 1.35 | 4.44E-04 | 0.0042 |
| TIMM17A          | 1.35 | 3.85E-03 | 0.0142 |
| ENST000002457960 | 1.35 | 5.47E-04 | 0.0046 |
| COX7B            | 1.35 | 6.56E-04 | 0.0051 |
| DRAP1            | 1.35 | 2.56E-03 | 0.0111 |
| PSENN            | 1.35 | 2.55E-03 | 0.0111 |
| SLC25A33         | 1.35 | 1.15E-02 | 0.0295 |
| POLR1C           | 1.35 | 5.73E-03 | 0.0185 |
| AMIGO2           | 1.35 | 9.49E-04 | 0.0063 |
| DPM2             | 1.35 | 6.13E-03 | 0.0193 |
| SH3BP1           | 1.35 | 4.09E-03 | 0.0148 |
| ARPC1A           | 1.35 | 1.73E-03 | 0.0088 |
| MRPL28           | 1.35 | 7.64E-03 | 0.0223 |
| NOL10            | 1.35 | 2.09E-03 | 0.0098 |
| ALKBH5           | 1.35 | 4.90E-04 | 0.0044 |
| ENST000003328590 | 1.35 | 8.66E-03 | 0.0243 |
| DLD              | 1.35 | 1.45E-03 | 0.0080 |
| UBFD1            | 1.35 | 9.55E-04 | 0.0063 |
| CASP2            | 1.35 | 9.55E-04 | 0.0063 |
| SERPINH1         | 1.35 | 1.25E-03 | 0.0073 |
| ENST000002517220 | 1.35 | 1.18E-02 | 0.0302 |
| USP28            | 1.35 | 5.50E-04 | 0.0047 |
| POLB             | 1.35 | 5.36E-04 | 0.0046 |
| ATP6V1A          | 1.35 | 5.81E-04 | 0.0048 |
| C11orf65         | 1.35 | 3.22E-03 | 0.0127 |
| TMEM102          | 1.35 | 5.69E-03 | 0.0184 |
| HAUS5            | 1.34 | 1.94E-03 | 0.0094 |
| OSTC             | 1.34 | 5.24E-04 | 0.0045 |
| COL27A1          | 1.34 | 2.85E-03 | 0.0118 |
| AC020658.3       | 1.34 | 1.93E-02 | 0.0428 |
| ZNF625           | 1.34 | 2.38E-03 | 0.0106 |
| RAD23B           | 1.34 | 1.02E-03 | 0.0065 |
| AC103706.1       | 1.34 | 1.83E-02 | 0.0413 |
| CREB3L4          | 1.34 | 2.71E-03 | 0.0114 |
| SFT2D1           | 1.34 | 1.22E-03 | 0.0072 |
| GPATCH4          | 1.34 | 1.61E-02 | 0.0375 |
| GTF3C4           | 1.34 | 7.63E-04 | 0.0056 |
| USO1             | 1.34 | 5.08E-04 | 0.0045 |
| TCTEX1D2         | 1.34 | 2.54E-03 | 0.0110 |

|                  |      |          |        |
|------------------|------|----------|--------|
| ENST000003018210 | 1.34 | 3.39E-04 | 0.0037 |
| INTS7            | 1.34 | 7.76E-04 | 0.0056 |
| HIST1H2BN        | 1.34 | 3.28E-03 | 0.0128 |
| SNHG17           | 1.34 | 3.59E-03 | 0.0136 |
| TNIP1            | 1.34 | 8.36E-04 | 0.0058 |
| ZNF620           | 1.34 | 1.63E-02 | 0.0379 |
| DCAF13           | 1.34 | 1.19E-03 | 0.0071 |
| FICD             | 1.34 | 1.48E-03 | 0.0080 |
| APOBEC3F         | 1.34 | 8.29E-03 | 0.0236 |
| ECE1             | 1.34 | 1.05E-03 | 0.0066 |
| GLB1             | 1.34 | 6.40E-04 | 0.0051 |
| SECTM1           | 1.34 | 9.58E-03 | 0.0260 |
| SLC35E4          | 1.34 | 1.28E-02 | 0.0318 |
| CISD2            | 1.34 | 9.00E-03 | 0.0249 |
| TOMM5            | 1.34 | 6.77E-03 | 0.0206 |
| DDX54            | 1.34 | 1.05E-02 | 0.0277 |
| XYLB             | 1.34 | 1.86E-02 | 0.0418 |
| BAX              | 1.34 | 2.38E-02 | 0.0497 |
| SEC24A           | 1.34 | 1.35E-03 | 0.0076 |
| ORC6             | 1.34 | 6.29E-04 | 0.0050 |
| UTP20            | 1.34 | 4.86E-03 | 0.0165 |
| SGCB             | 1.33 | 2.66E-03 | 0.0113 |
| AP2A1            | 1.33 | 1.52E-03 | 0.0081 |
| IMPA1            | 1.33 | 5.45E-04 | 0.0046 |
| ATP6V0B          | 1.33 | 5.49E-03 | 0.0179 |
| TOR1A            | 1.33 | 1.04E-03 | 0.0066 |
| TWSG1            | 1.33 | 2.22E-03 | 0.0101 |
| SMC1A            | 1.33 | 5.86E-04 | 0.0048 |
| PARL             | 1.33 | 1.76E-03 | 0.0089 |
| LACC1            | 1.33 | 2.58E-03 | 0.0111 |
| ENST000002765202 | 1.33 | 6.87E-03 | 0.0208 |
| ZUP1             | 1.33 | 5.11E-04 | 0.0045 |
| RND1             | 1.33 | 1.59E-02 | 0.0371 |
| CXorf40B         | 1.33 | 2.56E-03 | 0.0111 |
| ENST000003413691 | 1.33 | 7.88E-03 | 0.0228 |
| ZC3HC1           | 1.33 | 2.59E-03 | 0.0112 |
| ARL1             | 1.33 | 6.55E-04 | 0.0051 |
| APOLD1           | 1.33 | 1.54E-03 | 0.0082 |
| BTF3L4P2         | 1.33 | 6.26E-03 | 0.0195 |
| SRRD             | 1.33 | 1.45E-02 | 0.0349 |
| NOL7             | 1.33 | 1.33E-03 | 0.0075 |
| CCDC117          | 1.33 | 8.26E-04 | 0.0058 |
| NRAS             | 1.33 | 1.11E-03 | 0.0068 |
| HAUS6            | 1.33 | 4.52E-04 | 0.0043 |
| NEDD1            | 1.33 | 4.62E-04 | 0.0043 |
| MED8             | 1.33 | 1.10E-03 | 0.0068 |
| TMEM101          | 1.33 | 1.87E-03 | 0.0092 |



|                  |      |          |        |
|------------------|------|----------|--------|
| SZRD1            | 1.33 | 1.60E-03 | 0.0084 |
| ZNF330           | 1.33 | 5.64E-04 | 0.0048 |
| AC007728.3       | 1.33 | 1.01E-02 | 0.0270 |
| HARS             | 1.33 | 9.40E-04 | 0.0063 |
| RTCA             | 1.33 | 7.94E-04 | 0.0057 |
| KIF1C            | 1.32 | 4.80E-03 | 0.0164 |
| ENST000003513930 | 1.32 | 1.90E-02 | 0.0424 |
| C5orf15          | 1.32 | 8.26E-04 | 0.0058 |
| GPX4             | 1.32 | 8.88E-04 | 0.0060 |
| PPP1CA           | 1.32 | 1.65E-03 | 0.0086 |
| CCDC6            | 1.32 | 1.22E-03 | 0.0072 |
| TIMM50           | 1.32 | 1.54E-03 | 0.0082 |
| CPSF4            | 1.32 | 7.43E-04 | 0.0055 |
| CEP85            | 1.32 | 8.70E-04 | 0.0060 |
| ABI3             | 1.32 | 1.55E-02 | 0.0365 |
| ENST000003552720 | 1.32 | 1.41E-03 | 0.0078 |
| RHNO1            | 1.32 | 1.31E-03 | 0.0075 |
| CALU             | 1.32 | 5.29E-04 | 0.0046 |
| TRIT1            | 1.32 | 1.00E-03 | 0.0065 |
| ANXA5            | 1.32 | 1.63E-03 | 0.0085 |
| IARS2            | 1.32 | 8.99E-04 | 0.0061 |
| MRPS18C          | 1.32 | 1.06E-03 | 0.0066 |
| AP4M1            | 1.32 | 5.16E-03 | 0.0172 |
| NEDD8            | 1.32 | 9.97E-04 | 0.0064 |
| GFPT1            | 1.32 | 6.03E-04 | 0.0049 |
| PRKAG1           | 1.32 | 2.03E-03 | 0.0096 |
| ABCB10           | 1.32 | 3.55E-03 | 0.0135 |
| SLC39A8          | 1.32 | 4.91E-04 | 0.0044 |
| CTSB             | 1.32 | 1.84E-03 | 0.0091 |
| PDK3             | 1.32 | 7.03E-04 | 0.0054 |
| ENST000002428270 | 1.32 | 1.33E-02 | 0.0327 |
| KLHL25           | 1.32 | 9.77E-03 | 0.0263 |
| HADH             | 1.31 | 8.53E-04 | 0.0059 |
| ANKRD33B         | 1.31 | 4.17E-03 | 0.0150 |
| WDR43            | 1.31 | 1.60E-03 | 0.0084 |
| RTEL1            | 1.31 | 6.53E-03 | 0.0201 |
| KIF22            | 1.31 | 7.83E-04 | 0.0056 |
| INTS2            | 1.31 | 5.77E-04 | 0.0048 |
| RAD23A           | 1.31 | 4.43E-03 | 0.0156 |
| EIPR1            | 1.31 | 1.19E-03 | 0.0071 |
| SMC3             | 1.31 | 4.75E-04 | 0.0044 |
| CCDC9            | 1.31 | 7.32E-03 | 0.0217 |
| ZNF2             | 1.31 | 9.54E-03 | 0.0260 |
| SNX33            | 1.31 | 3.40E-03 | 0.0131 |
| PARD6A           | 1.31 | 1.05E-02 | 0.0277 |
| UPRT             | 1.31 | 4.29E-03 | 0.0153 |
| NDUFAF3          | 1.31 | 2.92E-03 | 0.0119 |

|                  |      |          |        |
|------------------|------|----------|--------|
| CEP76            | 1.31 | 9.68E-04 | 0.0064 |
| SNAP29           | 1.31 | 8.47E-03 | 0.0239 |
| PSMD1            | 1.31 | 8.69E-04 | 0.0060 |
| MTX1             | 1.31 | 1.30E-03 | 0.0075 |
| MRPS33           | 1.31 | 1.04E-03 | 0.0066 |
| BAD              | 1.31 | 5.07E-03 | 0.0170 |
| UBAC1            | 1.31 | 9.94E-04 | 0.0064 |
| RBM15            | 1.31 | 5.76E-04 | 0.0048 |
| C11orf74         | 1.31 | 1.29E-02 | 0.0322 |
| LCP1             | 1.30 | 2.84E-04 | 0.0035 |
| HYLS1            | 1.30 | 1.94E-03 | 0.0094 |
| ENST000003300451 | 1.30 | 1.36E-02 | 0.0332 |
| AC008443.1       | 1.30 | 1.25E-02 | 0.0314 |
| ENST000002292682 | 1.30 | 7.92E-03 | 0.0229 |
| ENST000003506380 | 1.30 | 8.20E-03 | 0.0234 |
| LETM1            | 1.30 | 2.07E-03 | 0.0097 |
| PGM1             | 1.30 | 8.38E-04 | 0.0058 |
| INTS14           | 1.30 | 6.69E-04 | 0.0052 |
| ENST000002161211 | 1.30 | 1.30E-03 | 0.0074 |
| DHFR2            | 1.30 | 1.45E-03 | 0.0079 |
| SLC35B1          | 1.30 | 3.07E-03 | 0.0123 |
| LLGL1            | 1.30 | 2.13E-03 | 0.0099 |
| GRSF1            | 1.30 | 7.73E-04 | 0.0056 |
| MTMR4            | 1.30 | 1.85E-03 | 0.0092 |
| CENPX            | 1.30 | 1.36E-02 | 0.0332 |
| CCDC102A         | 1.30 | 3.39E-03 | 0.0131 |
| ENST000003521711 | 1.30 | 5.56E-04 | 0.0047 |
| RAB34            | 1.30 | 7.91E-03 | 0.0229 |
| ENST000003567081 | 1.30 | 6.49E-04 | 0.0051 |
| MFN2             | 1.30 | 2.35E-03 | 0.0105 |
| RNF145           | 1.30 | 7.43E-04 | 0.0055 |
| ABHD5            | 1.30 | 3.74E-03 | 0.0140 |
| RCAN1            | 1.30 | 2.04E-03 | 0.0096 |
| RBBP7            | 1.30 | 4.61E-04 | 0.0043 |
| GNG10            | 1.30 | 3.32E-03 | 0.0129 |
| ERO1A            | 1.30 | 8.43E-04 | 0.0059 |
| C1orf198         | 1.30 | 6.43E-03 | 0.0199 |
| CD40             | 1.30 | 2.10E-02 | 0.0455 |
| ZNF212           | 1.30 | 2.74E-03 | 0.0115 |
| PSMD7            | 1.30 | 2.45E-03 | 0.0108 |
| SMG5             | 1.30 | 9.07E-04 | 0.0061 |
| B3GNT10          | 1.30 | 2.29E-02 | 0.0483 |
| TOB2             | 1.30 | 3.57E-03 | 0.0136 |
| PPP4R2           | 1.30 | 6.69E-04 | 0.0052 |
| PRPS1            | 1.30 | 6.64E-04 | 0.0052 |
| YIPF2            | 1.29 | 2.14E-03 | 0.0099 |
| AL354920.1       | 1.29 | 2.33E-02 | 0.0489 |

|                  |      |          |        |
|------------------|------|----------|--------|
| IFI30            | 1.29 | 3.21E-03 | 0.0127 |
| TACO1            | 1.29 | 2.87E-03 | 0.0118 |
| EIF2D            | 1.29 | 7.70E-04 | 0.0056 |
| ENST000003104540 | 1.29 | 1.30E-03 | 0.0074 |
| TGIF2-RAB5IF     | 1.29 | 1.78E-02 | 0.0405 |
| RFT1             | 1.29 | 2.34E-03 | 0.0105 |
| THAP4            | 1.29 | 1.35E-03 | 0.0076 |
| PPP1R8           | 1.29 | 1.49E-03 | 0.0081 |
| THOC7            | 1.29 | 8.81E-04 | 0.0060 |
| IDH3B            | 1.29 | 7.01E-04 | 0.0054 |
| SNHG15           | 1.29 | 8.35E-04 | 0.0058 |
| SLC12A4          | 1.29 | 3.10E-03 | 0.0124 |
| BOLA2            | 1.29 | 4.95E-03 | 0.0167 |
| NFKB1            | 1.29 | 3.84E-04 | 0.0039 |
| ENST000002722981 | 1.29 | 5.63E-03 | 0.0182 |
| TBCA             | 1.29 | 2.21E-03 | 0.0101 |
| RAB7A            | 1.28 | 7.94E-03 | 0.0230 |
| CNDP2            | 1.28 | 1.49E-03 | 0.0081 |
| TXNL4B           | 1.28 | 1.04E-03 | 0.0066 |
| NOD2             | 1.28 | 7.34E-03 | 0.0217 |
| PAK1             | 1.28 | 1.40E-03 | 0.0078 |
| SF3B3            | 1.28 | 1.51E-03 | 0.0081 |
| DHRS11           | 1.28 | 6.40E-03 | 0.0198 |
| UBE2L3           | 1.28 | 2.80E-03 | 0.0117 |
| LAS1L            | 1.28 | 1.30E-03 | 0.0074 |
| CAPRIN1          | 1.28 | 7.07E-04 | 0.0054 |
| KLHL17           | 1.28 | 6.34E-03 | 0.0197 |
| ENST000003239970 | 1.28 | 2.23E-02 | 0.0474 |
| SMG9             | 1.28 | 2.55E-03 | 0.0111 |
| DBF4             | 1.28 | 8.19E-04 | 0.0058 |
| TMEM126A         | 1.28 | 4.72E-03 | 0.0162 |
| AP000845.1       | 1.28 | 1.83E-02 | 0.0412 |
| LYPLA2           | 1.28 | 4.32E-03 | 0.0153 |
| BMP1             | 1.28 | 1.37E-02 | 0.0335 |
| LGALSL           | 1.28 | 2.02E-02 | 0.0442 |
| ENST000003347051 | 1.28 | 1.12E-03 | 0.0068 |
| WSB1             | 1.28 | 3.63E-03 | 0.0137 |
| PUS1             | 1.28 | 4.43E-03 | 0.0156 |
| KBTBD8           | 1.27 | 7.26E-04 | 0.0055 |
| SLC25A39         | 1.27 | 1.38E-02 | 0.0337 |
| PTMA             | 1.27 | 8.32E-03 | 0.0236 |
| SNRPB2           | 1.27 | 2.13E-03 | 0.0099 |
| TOP1MT           | 1.27 | 8.02E-03 | 0.0231 |
| NUP35            | 1.27 | 8.71E-04 | 0.0060 |
| ENST000003027460 | 1.27 | 6.56E-04 | 0.0051 |
| ENST000002623182 | 1.27 | 2.41E-03 | 0.0107 |
| BUD23            | 1.27 | 1.78E-03 | 0.0089 |

|                  |      |          |        |
|------------------|------|----------|--------|
| NELFB            | 1.27 | 1.06E-03 | 0.0066 |
| LGALS9           | 1.27 | 8.73E-03 | 0.0244 |
| MYO1C            | 1.27 | 7.22E-03 | 0.0215 |
| ENST000003140451 | 1.27 | 2.09E-03 | 0.0098 |
| SNUPN            | 1.27 | 2.22E-03 | 0.0101 |
| ACTR1B           | 1.27 | 6.71E-04 | 0.0052 |
| SOGA3            | 1.27 | 2.23E-02 | 0.0474 |
| ENST000003613830 | 1.27 | 2.67E-03 | 0.0113 |
| PLIN3            | 1.27 | 1.34E-03 | 0.0076 |
| LRIF1            | 1.27 | 4.21E-03 | 0.0151 |
| RNASEH2C         | 1.27 | 5.84E-03 | 0.0187 |
| ZNF132           | 1.27 | 7.06E-03 | 0.0212 |
| POLR2J           | 1.27 | 2.35E-03 | 0.0105 |
| COPE             | 1.27 | 1.30E-03 | 0.0075 |
| FAM200A          | 1.27 | 3.59E-03 | 0.0136 |
| FUT11            | 1.27 | 1.28E-03 | 0.0074 |
| UQCRFS1          | 1.26 | 1.28E-03 | 0.0074 |
| ARMC9            | 1.26 | 1.46E-02 | 0.0350 |
| ELOVL1           | 1.26 | 1.83E-03 | 0.0091 |
| ATP5ME           | 1.26 | 3.20E-03 | 0.0126 |
| LTA4H            | 1.26 | 7.73E-04 | 0.0056 |
| ENST000003104411 | 1.26 | 2.55E-03 | 0.0111 |
| ENST000003346510 | 1.26 | 2.59E-03 | 0.0111 |
| COPS7A           | 1.26 | 1.10E-02 | 0.0286 |
| NADK             | 1.26 | 3.69E-03 | 0.0139 |
| SLC6A6           | 1.26 | 3.53E-03 | 0.0134 |
| AFG3L2           | 1.26 | 1.59E-03 | 0.0084 |
| PDZD11           | 1.25 | 2.27E-03 | 0.0103 |
| MRPS28           | 1.25 | 1.39E-03 | 0.0078 |
| NFS1             | 1.25 | 1.11E-03 | 0.0068 |
| C8orf37          | 1.25 | 1.85E-02 | 0.0416 |
| TAGLN2           | 1.25 | 1.53E-03 | 0.0082 |
| PLAUR            | 1.25 | 1.10E-02 | 0.0287 |
| EPN1             | 1.25 | 1.93E-02 | 0.0428 |
| LMAN2            | 1.25 | 2.19E-03 | 0.0100 |
| RBM8A            | 1.25 | 6.08E-03 | 0.0192 |
| SUMO2            | 1.25 | 1.87E-03 | 0.0092 |
| TTL4             | 1.25 | 4.91E-03 | 0.0166 |
| KLC2             | 1.25 | 2.70E-03 | 0.0114 |
| ENST000002605851 | 1.25 | 1.05E-03 | 0.0066 |
| DERA             | 1.25 | 3.20E-03 | 0.0126 |
| MRPL41           | 1.25 | 1.23E-02 | 0.0310 |
| ENST000002252981 | 1.25 | 1.64E-03 | 0.0085 |
| MCOLN2           | 1.25 | 7.23E-04 | 0.0054 |
| UBTD2            | 1.25 | 7.32E-03 | 0.0217 |
| SPRYD7           | 1.25 | 8.54E-03 | 0.0241 |
| SGPL1            | 1.25 | 3.13E-03 | 0.0125 |

|                  |      |          |        |
|------------------|------|----------|--------|
| ENDOG            | 1.25 | 1.23E-02 | 0.0310 |
| NENF             | 1.25 | 2.38E-03 | 0.0106 |
| MRPL52           | 1.25 | 2.51E-03 | 0.0110 |
| TWISTNB          | 1.25 | 2.07E-03 | 0.0097 |
| CCDC167          | 1.24 | 2.21E-03 | 0.0101 |
| AC090825.1       | 1.24 | 4.42E-03 | 0.0155 |
| ENST000002992750 | 1.24 | 1.03E-02 | 0.0274 |
| TARS2            | 1.24 | 8.13E-04 | 0.0057 |
| NUP85            | 1.24 | 9.53E-04 | 0.0063 |
| RUSC1            | 1.24 | 3.52E-03 | 0.0134 |
| PLRG1            | 1.24 | 9.72E-04 | 0.0064 |
| ENST000003241980 | 1.24 | 1.29E-03 | 0.0074 |
| ITGB3BP          | 1.24 | 2.90E-03 | 0.0119 |
| CHCHD3           | 1.24 | 3.61E-03 | 0.0137 |
| FNTB             | 1.24 | 6.06E-03 | 0.0191 |
| MRPL46           | 1.24 | 1.28E-03 | 0.0074 |
| IFT81            | 1.24 | 1.05E-02 | 0.0277 |
| BCAP29           | 1.24 | 8.36E-04 | 0.0058 |
| ZBTB9            | 1.24 | 5.66E-03 | 0.0183 |
| ENST00000508524  | 1.24 | 1.94E-02 | 0.0429 |
| TSFM             | 1.24 | 4.64E-03 | 0.0161 |
| MRPS5            | 1.24 | 8.12E-04 | 0.0057 |
| SUCLG1           | 1.24 | 8.91E-04 | 0.0061 |
| SEC11C           | 1.24 | 1.51E-03 | 0.0081 |
| FLII             | 1.24 | 9.48E-04 | 0.0063 |
| SUZ12            | 1.24 | 6.25E-04 | 0.0050 |
| KRT8P39          | 1.24 | 1.61E-02 | 0.0376 |
| HEATR1           | 1.24 | 1.80E-03 | 0.0090 |
| TRMT6            | 1.24 | 5.53E-03 | 0.0180 |
| PAM16            | 1.24 | 1.14E-02 | 0.0293 |
| TM9SF1           | 1.24 | 2.13E-03 | 0.0099 |
| LSM6             | 1.24 | 3.78E-03 | 0.0141 |
| SLC5A3           | 1.24 | 6.35E-03 | 0.0197 |
| MAGEF1           | 1.24 | 4.40E-03 | 0.0155 |
| LDHB             | 1.24 | 1.08E-03 | 0.0067 |
| ENST000003419230 | 1.24 | 3.05E-03 | 0.0123 |
| ENST000003261320 | 1.24 | 3.49E-03 | 0.0133 |
| TTC33            | 1.24 | 7.18E-04 | 0.0054 |
| ENST000002658491 | 1.24 | 2.99E-03 | 0.0121 |
| ENST000001972682 | 1.24 | 6.11E-03 | 0.0192 |
| MRRF             | 1.24 | 1.13E-03 | 0.0069 |
| MMS22L           | 1.24 | 6.05E-04 | 0.0049 |
| SF3A3            | 1.23 | 1.35E-03 | 0.0076 |
| DPH2             | 1.23 | 8.38E-03 | 0.0238 |
| WDR75            | 1.23 | 2.60E-03 | 0.0112 |
| WDR36            | 1.23 | 1.31E-03 | 0.0075 |
| SP140            | 1.23 | 1.10E-03 | 0.0068 |

|                  |      |          |        |
|------------------|------|----------|--------|
| SRGN             | 1.23 | 2.49E-03 | 0.0109 |
| PSMD5            | 1.23 | 1.06E-03 | 0.0066 |
| ENST000002644330 | 1.23 | 1.11E-03 | 0.0068 |
| UNC119B          | 1.23 | 2.04E-03 | 0.0096 |
| BAZ1B            | 1.23 | 7.57E-04 | 0.0055 |
| INSR             | 1.23 | 8.40E-03 | 0.0238 |
| EBPL             | 1.23 | 7.06E-03 | 0.0212 |
| INAFM1           | 1.23 | 2.13E-02 | 0.0460 |
| PWP1             | 1.23 | 3.98E-03 | 0.0145 |
| GTSF1            | 1.23 | 1.82E-02 | 0.0410 |
| H2AFV            | 1.23 | 1.55E-03 | 0.0083 |
| ASCC1            | 1.23 | 2.47E-03 | 0.0108 |
| KLHL12           | 1.23 | 6.72E-04 | 0.0052 |
| MLLT1            | 1.23 | 5.87E-03 | 0.0187 |
| QPCTL            | 1.23 | 7.43E-03 | 0.0219 |
| FKBP2            | 1.23 | 1.80E-03 | 0.0090 |
| PKIB             | 1.23 | 1.82E-02 | 0.0410 |
| DHX30            | 1.23 | 8.22E-04 | 0.0058 |
| CCDC138          | 1.23 | 1.18E-03 | 0.0071 |
| SNORD13          | 1.23 | 9.30E-03 | 0.0255 |
| RAE1             | 1.23 | 1.01E-03 | 0.0065 |
| SBNO2            | 1.23 | 2.32E-03 | 0.0104 |
| BAG4             | 1.23 | 1.60E-03 | 0.0084 |
| KLHL6            | 1.23 | 4.50E-03 | 0.0157 |
| FBXW11           | 1.23 | 5.70E-03 | 0.0184 |
| PTBP1            | 1.23 | 2.67E-03 | 0.0113 |
| ISOC1            | 1.23 | 1.36E-03 | 0.0076 |
| HSDL2            | 1.23 | 1.66E-03 | 0.0086 |
| TMX2             | 1.23 | 1.44E-03 | 0.0079 |
| AAAS             | 1.23 | 6.31E-03 | 0.0196 |
| HLTF             | 1.23 | 1.48E-03 | 0.0080 |
| CKAP4            | 1.22 | 2.02E-03 | 0.0096 |
| ALG8             | 1.22 | 1.04E-03 | 0.0066 |
| TRIM16L          | 1.22 | 5.47E-03 | 0.0179 |
| ZNF490           | 1.22 | 7.05E-03 | 0.0212 |
| UBE2I            | 1.22 | 7.59E-04 | 0.0055 |
| ALG3             | 1.22 | 3.87E-03 | 0.0143 |
| ACO2             | 1.22 | 2.81E-03 | 0.0117 |
| FBXO41           | 1.22 | 5.54E-03 | 0.0181 |
| COX6B1           | 1.22 | 7.51E-04 | 0.0055 |
| ENST000003122630 | 1.22 | 1.91E-03 | 0.0093 |
| LSM10            | 1.22 | 2.82E-03 | 0.0117 |
| ENST000002194731 | 1.22 | 2.02E-03 | 0.0096 |
| ENST000002805570 | 1.22 | 1.19E-03 | 0.0071 |
| CST7             | 1.22 | 1.98E-02 | 0.0435 |
| ENST000003591910 | 1.22 | 1.20E-02 | 0.0305 |
| DCTN2            | 1.22 | 1.28E-03 | 0.0074 |

|                  |      |          |        |
|------------------|------|----------|--------|
| DOCK3            | 1.22 | 9.92E-03 | 0.0266 |
| RAB9A            | 1.22 | 2.58E-03 | 0.0111 |
| SRP68            | 1.22 | 6.29E-03 | 0.0196 |
| HDAC3            | 1.22 | 1.08E-03 | 0.0067 |
| TATDN1           | 1.22 | 1.78E-03 | 0.0089 |
| ENST000001934030 | 1.22 | 2.13E-02 | 0.0460 |
| UAP1             | 1.22 | 3.46E-03 | 0.0133 |
| IPMK             | 1.22 | 1.86E-03 | 0.0092 |
| ANAPC1           | 1.22 | 6.57E-04 | 0.0052 |
| TAF1D            | 1.22 | 1.37E-03 | 0.0077 |
| PLA2G4C          | 1.22 | 4.01E-03 | 0.0146 |
| FAM214B          | 1.22 | 1.50E-02 | 0.0357 |
| WRN              | 1.22 | 1.44E-03 | 0.0079 |
| SSR3             | 1.22 | 1.52E-03 | 0.0082 |
| ANP32A           | 1.21 | 2.30E-03 | 0.0104 |
| METTL2A          | 1.21 | 1.00E-02 | 0.0268 |
| JAM3             | 1.21 | 1.66E-03 | 0.0086 |
| AAGAB            | 1.21 | 1.88E-03 | 0.0092 |
| NDUFS5           | 1.21 | 3.37E-03 | 0.0131 |
| PHF5A            | 1.21 | 1.45E-03 | 0.0079 |
| AKR1B1           | 1.21 | 1.51E-03 | 0.0081 |
| ENST000002701420 | 1.21 | 1.21E-02 | 0.0307 |
| AGMAT            | 1.21 | 1.86E-03 | 0.0092 |
| EDC3             | 1.21 | 3.80E-03 | 0.0141 |
| ID2              | 1.21 | 4.76E-03 | 0.0163 |
| ENST000002617140 | 1.21 | 1.42E-03 | 0.0079 |
| ARID3A           | 1.21 | 1.49E-02 | 0.0356 |
| TRMT10A          | 1.21 | 2.63E-03 | 0.0112 |
| TPRKB            | 1.21 | 3.23E-03 | 0.0127 |
| LEPR             | 1.21 | 5.33E-03 | 0.0176 |
| CEP57            | 1.21 | 7.79E-04 | 0.0056 |
| CS               | 1.21 | 3.81E-03 | 0.0141 |
| PEX12            | 1.21 | 4.51E-03 | 0.0158 |
| MZT2B            | 1.21 | 3.28E-03 | 0.0128 |
| L2HGDH           | 1.21 | 1.29E-03 | 0.0074 |
| ATP6AP1L         | 1.21 | 3.51E-03 | 0.0134 |
| ZSCAN21          | 1.21 | 2.95E-03 | 0.0120 |
| CTDNEP1          | 1.20 | 3.84E-03 | 0.0142 |
| GLS2             | 1.20 | 8.75E-03 | 0.0245 |
| TRIM21           | 1.20 | 1.62E-03 | 0.0085 |
| MRPS6            | 1.20 | 3.14E-03 | 0.0125 |
| RBX1             | 1.20 | 1.75E-03 | 0.0089 |
| TRMT10C          | 1.20 | 3.18E-03 | 0.0126 |
| RASL11A          | 1.20 | 1.49E-02 | 0.0356 |
| SNHG10           | 1.20 | 6.83E-03 | 0.0207 |
| SKIL             | 1.20 | 1.03E-02 | 0.0272 |
| C19orf53         | 1.20 | 3.77E-03 | 0.0140 |

|                  |      |          |        |
|------------------|------|----------|--------|
| ENST000002908580 | 1.20 | 1.70E-03 | 0.0087 |
| EIF1AY           | 1.20 | 1.25E-03 | 0.0073 |
| CENPBD1P1        | 1.20 | 2.04E-03 | 0.0096 |
| BSG              | 1.20 | 5.99E-03 | 0.0190 |
| ENST000003339871 | 1.20 | 5.98E-03 | 0.0190 |
| ENST000003545030 | 1.20 | 1.36E-03 | 0.0076 |
| MAGOH            | 1.20 | 2.53E-03 | 0.0110 |
| FOXRED1          | 1.20 | 1.51E-03 | 0.0081 |
| ASAH2B           | 1.20 | 7.09E-03 | 0.0212 |
| EFNB1            | 1.20 | 1.45E-02 | 0.0349 |
| FAF2             | 1.20 | 8.95E-04 | 0.0061 |
| DPM1             | 1.20 | 2.40E-03 | 0.0106 |
| AGPAT2           | 1.20 | 6.58E-03 | 0.0202 |
| ENST000002479560 | 1.20 | 6.54E-03 | 0.0201 |
| FOXRED2          | 1.20 | 2.08E-02 | 0.0451 |
| CYBC1            | 1.20 | 1.09E-02 | 0.0284 |
| SWAP70           | 1.20 | 9.54E-03 | 0.0260 |
| MST1             | 1.20 | 1.37E-02 | 0.0334 |
| FAM171B          | 1.20 | 7.42E-03 | 0.0219 |
| MRPS31           | 1.20 | 1.34E-03 | 0.0076 |
| CHKA             | 1.20 | 9.17E-03 | 0.0253 |
| SDF4             | 1.20 | 1.97E-03 | 0.0095 |
| TUBE1            | 1.20 | 1.85E-03 | 0.0091 |
| WARS2            | 1.20 | 2.26E-03 | 0.0102 |
| ZNF764           | 1.19 | 5.18E-03 | 0.0173 |
| OPN3             | 1.19 | 3.35E-03 | 0.0130 |
| MIS18BP1         | 1.19 | 1.08E-03 | 0.0067 |
| MRM3             | 1.19 | 2.71E-03 | 0.0114 |
| SYT11            | 1.19 | 1.29E-03 | 0.0074 |
| RAB10            | 1.19 | 1.75E-03 | 0.0089 |
| IPO4             | 1.19 | 1.71E-03 | 0.0087 |
| NUP153           | 1.19 | 6.59E-04 | 0.0052 |
| VKORC1           | 1.19 | 1.97E-03 | 0.0095 |
| NDUFS4           | 1.19 | 1.46E-03 | 0.0080 |
| REPIN1           | 1.19 | 3.77E-03 | 0.0140 |
| NUP160           | 1.19 | 7.51E-04 | 0.0055 |
| ELP6             | 1.19 | 1.46E-03 | 0.0080 |
| XRCC1            | 1.19 | 4.99E-03 | 0.0168 |
| TTC38            | 1.19 | 3.93E-03 | 0.0144 |
| TRPT1            | 1.19 | 2.28E-02 | 0.0482 |
| GTF3C3           | 1.19 | 7.96E-04 | 0.0057 |
| AC026464.4       | 1.19 | 2.33E-03 | 0.0104 |
| SENP3            | 1.19 | 1.34E-02 | 0.0329 |
| PEX10            | 1.19 | 1.27E-02 | 0.0318 |
| CSTF1            | 1.19 | 8.99E-04 | 0.0061 |
| ARHGAP11B        | 1.19 | 2.04E-02 | 0.0445 |
| TSPAN33          | 1.19 | 8.04E-03 | 0.0231 |



|                  |      |          |        |
|------------------|------|----------|--------|
| RELL2            | 1.19 | 7.14E-03 | 0.0213 |
| AP1AR            | 1.19 | 2.44E-03 | 0.0107 |
| NRROS            | 1.19 | 1.05E-02 | 0.0277 |
| RRP1B            | 1.18 | 1.01E-03 | 0.0065 |
| ATP6VOA2         | 1.18 | 1.91E-03 | 0.0093 |
| CEP83            | 1.18 | 3.26E-03 | 0.0128 |
| IMPDH1           | 1.18 | 4.74E-03 | 0.0163 |
| PITRM1           | 1.18 | 4.49E-03 | 0.0157 |
| ENST000003419800 | 1.18 | 3.18E-03 | 0.0126 |
| DDOST            | 1.18 | 1.23E-03 | 0.0072 |
| ENST000002525123 | 1.18 | 9.68E-04 | 0.0064 |
| XRCC4            | 1.18 | 2.91E-03 | 0.0119 |
| ZNF672           | 1.18 | 4.86E-03 | 0.0166 |
| NTAN1            | 1.18 | 3.06E-03 | 0.0123 |
| ENST000002284950 | 1.18 | 5.74E-03 | 0.0185 |
| CMTM6            | 1.18 | 5.88E-03 | 0.0188 |
| ZDHHC13          | 1.18 | 1.19E-03 | 0.0071 |
| MBOAT2           | 1.18 | 7.88E-03 | 0.0228 |
| ENST000003266390 | 1.18 | 8.20E-03 | 0.0234 |
| GRAMD2B          | 1.18 | 3.05E-03 | 0.0123 |
| DAPK3            | 1.18 | 2.79E-03 | 0.0116 |
| C8orf76          | 1.18 | 2.78E-03 | 0.0116 |
| CDC27            | 1.18 | 1.17E-03 | 0.0070 |
| SCAMP3           | 1.18 | 1.68E-03 | 0.0086 |
| DPY30            | 1.18 | 1.24E-03 | 0.0073 |
| ZNF322           | 1.18 | 5.79E-03 | 0.0186 |
| MAPK6            | 1.18 | 1.16E-02 | 0.0297 |
| DEXI             | 1.18 | 2.20E-03 | 0.0101 |
| IPPK             | 1.18 | 1.55E-03 | 0.0083 |
| CNOT9            | 1.18 | 2.84E-03 | 0.0117 |
| KIAA0753         | 1.18 | 8.19E-03 | 0.0234 |
| ARL13B           | 1.17 | 7.06E-03 | 0.0212 |
| ENST000003055360 | 1.17 | 1.26E-03 | 0.0073 |
| INIP             | 1.17 | 3.93E-03 | 0.0144 |
| CBX5             | 1.17 | 3.89E-03 | 0.0143 |
| SNAPC2           | 1.17 | 1.24E-02 | 0.0312 |
| SNORA79B         | 1.17 | 4.48E-03 | 0.0157 |
| ACTR3            | 1.17 | 7.10E-04 | 0.0054 |
| CLCN5            | 1.17 | 8.06E-03 | 0.0231 |
| C1RL-AS1         | 1.17 | 6.64E-03 | 0.0203 |
| PRXL2B           | 1.17 | 3.95E-03 | 0.0144 |
| ENST000002596321 | 1.17 | 3.68E-03 | 0.0139 |
| IL18R1           | 1.17 | 1.25E-02 | 0.0313 |
| PPM1M            | 1.17 | 3.40E-03 | 0.0131 |
| MIEF1            | 1.17 | 5.85E-03 | 0.0187 |
| RNF8             | 1.17 | 1.79E-03 | 0.0090 |
| AKT1             | 1.17 | 1.63E-03 | 0.0085 |

|                  |      |          |        |
|------------------|------|----------|--------|
| NPHP4            | 1.17 | 8.05E-03 | 0.0231 |
| AC245060.4       | 1.17 | 4.77E-03 | 0.0164 |
| POLR1E           | 1.17 | 2.03E-03 | 0.0096 |
| COX7A2           | 1.17 | 2.76E-03 | 0.0116 |
| DDX1             | 1.17 | 1.84E-03 | 0.0091 |
| ARCN1            | 1.17 | 1.49E-03 | 0.0081 |
| KIAA1958         | 1.17 | 1.06E-02 | 0.0280 |
| NDUFS3           | 1.17 | 2.55E-03 | 0.0111 |
| TRAFD1           | 1.17 | 1.76E-02 | 0.0401 |
| CPSF2            | 1.17 | 2.05E-03 | 0.0096 |
| TFB2M            | 1.17 | 6.28E-03 | 0.0195 |
| ZNF35            | 1.16 | 1.56E-02 | 0.0367 |
| MRPS11           | 1.16 | 3.73E-03 | 0.0140 |
| CCDC144CP        | 1.16 | 1.04E-02 | 0.0275 |
| TMEM205          | 1.16 | 1.12E-02 | 0.0291 |
| IWS1             | 1.16 | 8.74E-04 | 0.0060 |
| FAM27E3          | 1.16 | 1.06E-02 | 0.0278 |
| VEGFB            | 1.16 | 6.36E-03 | 0.0197 |
| DDX50            | 1.16 | 7.89E-04 | 0.0056 |
| ERCC2            | 1.16 | 2.53E-03 | 0.0110 |
| TXNDC9           | 1.16 | 5.81E-03 | 0.0186 |
| FZD4             | 1.16 | 6.48E-03 | 0.0200 |
| RHOA             | 1.16 | 7.17E-04 | 0.0054 |
| PLAA             | 1.16 | 1.41E-03 | 0.0078 |
| KLHDC8B          | 1.16 | 2.20E-02 | 0.0469 |
| ARHGAP18         | 1.16 | 4.69E-03 | 0.0162 |
| FAM118B          | 1.16 | 1.50E-02 | 0.0358 |
| SMARCD2          | 1.16 | 1.29E-03 | 0.0074 |
| ZNF250           | 1.16 | 1.36E-02 | 0.0334 |
| CFL1             | 1.16 | 1.29E-02 | 0.0322 |
| CHST10           | 1.16 | 9.39E-03 | 0.0257 |
| MRPS10           | 1.16 | 5.05E-03 | 0.0170 |
| TCF3             | 1.16 | 2.74E-03 | 0.0115 |
| PPRC1            | 1.16 | 8.20E-03 | 0.0234 |
| PLPBP            | 1.16 | 3.67E-03 | 0.0138 |
| API5             | 1.16 | 1.46E-03 | 0.0080 |
| TTC1             | 1.16 | 5.47E-03 | 0.0179 |
| B3GNT2           | 1.16 | 9.60E-04 | 0.0063 |
| GMPS             | 1.16 | 8.93E-04 | 0.0061 |
| ENST000002777460 | 1.16 | 7.61E-03 | 0.0223 |
| ENST000003044001 | 1.15 | 2.13E-02 | 0.0458 |
| MCAM             | 1.15 | 4.41E-03 | 0.0155 |
| C1orf216         | 1.15 | 7.57E-03 | 0.0222 |
| PPIL3            | 1.15 | 1.09E-03 | 0.0068 |
| SDHAF1           | 1.15 | 2.96E-03 | 0.0121 |
| VKORC1L1         | 1.15 | 8.29E-03 | 0.0236 |
| CYB5D1           | 1.15 | 4.78E-03 | 0.0164 |

|                  |      |          |        |
|------------------|------|----------|--------|
| TMEM39B          | 1.15 | 1.58E-02 | 0.0370 |
| ENST000002682512 | 1.15 | 1.70E-02 | 0.0391 |
| PDCD10           | 1.15 | 1.83E-03 | 0.0091 |
| LINC01137        | 1.15 | 1.02E-02 | 0.0271 |
| TNFRSF1B         | 1.15 | 2.86E-03 | 0.0118 |
| AC106795.4       | 1.15 | 8.03E-03 | 0.0231 |
| AP2M1            | 1.15 | 2.21E-03 | 0.0101 |
| CHUK             | 1.15 | 3.00E-03 | 0.0122 |
| STK3             | 1.15 | 2.84E-03 | 0.0117 |
| FTSJ1            | 1.15 | 1.83E-03 | 0.0091 |
| RXRA             | 1.15 | 8.14E-03 | 0.0233 |
| PGAP1            | 1.15 | 2.04E-02 | 0.0445 |
| MRPL33           | 1.15 | 4.38E-03 | 0.0155 |
| EXTL2            | 1.15 | 5.51E-03 | 0.0180 |
| RTL8A            | 1.15 | 2.36E-02 | 0.0494 |
| LY96             | 1.15 | 7.61E-03 | 0.0223 |
| ENST000003189743 | 1.15 | 1.93E-03 | 0.0094 |
| MRPL30           | 1.15 | 2.80E-03 | 0.0116 |
| UHRF1BP1L        | 1.14 | 5.86E-03 | 0.0187 |
| IMP4             | 1.14 | 4.22E-03 | 0.0151 |
| PIH1D1           | 1.14 | 6.38E-03 | 0.0198 |
| CRLS1            | 1.14 | 3.01E-03 | 0.0122 |
| CHEK2            | 1.14 | 1.67E-02 | 0.0385 |
| BABAM1           | 1.14 | 4.34E-03 | 0.0154 |
| IQGAP1           | 1.14 | 8.05E-04 | 0.0057 |
| RAD50            | 1.14 | 1.12E-03 | 0.0068 |
| LRWD1            | 1.14 | 2.39E-02 | 0.0499 |
| NDUFS1           | 1.14 | 1.45E-03 | 0.0080 |
| TIMM21           | 1.14 | 1.95E-03 | 0.0094 |
| PCBP1            | 1.14 | 1.21E-03 | 0.0072 |
| APOL2            | 1.14 | 1.00E-03 | 0.0065 |
| PEX5             | 1.14 | 2.41E-03 | 0.0107 |
| MED7             | 1.14 | 1.43E-03 | 0.0079 |
| ENST000002311981 | 1.14 | 2.26E-03 | 0.0102 |
| PPP6R1           | 1.14 | 2.11E-03 | 0.0098 |
| ACTR1A           | 1.14 | 1.48E-03 | 0.0080 |
| IRF2BPL          | 1.14 | 5.08E-03 | 0.0170 |
| ARMC6            | 1.14 | 5.80E-03 | 0.0186 |
| MANEA            | 1.14 | 1.42E-03 | 0.0079 |
| ECHDC1           | 1.14 | 5.83E-03 | 0.0187 |
| SCML2            | 1.14 | 1.62E-02 | 0.0377 |
| HS6ST1           | 1.14 | 4.06E-03 | 0.0147 |
| ST13             | 1.13 | 1.07E-03 | 0.0067 |
| CDC23            | 1.13 | 9.96E-04 | 0.0064 |
| C9orf16          | 1.13 | 3.72E-03 | 0.0140 |
| RNASEH1          | 1.13 | 7.34E-03 | 0.0217 |
| ATRIP            | 1.13 | 2.32E-03 | 0.0104 |

|                  |      |          |        |
|------------------|------|----------|--------|
| CHTF8            | 1.13 | 1.18E-03 | 0.0071 |
| CEP41            | 1.13 | 2.44E-03 | 0.0107 |
| TSEN15           | 1.13 | 2.43E-03 | 0.0107 |
| TMEM268          | 1.13 | 9.65E-03 | 0.0262 |
| TNPO3            | 1.13 | 1.08E-03 | 0.0067 |
| ADO              | 1.13 | 1.67E-03 | 0.0086 |
| COX7A2L          | 1.13 | 1.01E-03 | 0.0065 |
| COX16            | 1.13 | 5.57E-03 | 0.0181 |
| SCLY             | 1.13 | 9.67E-03 | 0.0262 |
| ENST000002645150 | 1.13 | 6.65E-03 | 0.0204 |
| AC005832.4       | 1.13 | 8.68E-03 | 0.0243 |
| ABRAXAS2         | 1.13 | 1.29E-02 | 0.0322 |
| COA3             | 1.13 | 1.14E-02 | 0.0293 |
| CALML4           | 1.13 | 4.17E-03 | 0.0150 |
| GSEC             | 1.13 | 8.72E-03 | 0.0244 |
| MRPL34           | 1.13 | 1.49E-02 | 0.0356 |
| LRRC40           | 1.13 | 1.56E-03 | 0.0083 |
| E2F3             | 1.13 | 3.71E-03 | 0.0139 |
| NECAB3           | 1.13 | 1.25E-02 | 0.0314 |
| ENST000003180080 | 1.13 | 1.44E-03 | 0.0079 |
| SEC61A1          | 1.13 | 1.18E-03 | 0.0071 |
| DNAJC25-GNG10    | 1.13 | 3.80E-03 | 0.0141 |
| HBS1L            | 1.12 | 8.60E-04 | 0.0059 |
| RPAP3            | 1.12 | 2.62E-03 | 0.0112 |
| IRGQ             | 1.12 | 2.41E-03 | 0.0107 |
| NUP62CL          | 1.12 | 8.95E-03 | 0.0249 |
| TOP3A            | 1.12 | 1.20E-03 | 0.0071 |
| MPDU1            | 1.12 | 4.42E-03 | 0.0155 |
| ENST000002576942 | 1.12 | 1.05E-02 | 0.0278 |
| UAP1L1           | 1.12 | 1.51E-02 | 0.0359 |
| C3orf18          | 1.12 | 3.17E-03 | 0.0126 |
| SACS             | 1.12 | 2.15E-03 | 0.0099 |
| LSM1             | 1.12 | 4.19E-03 | 0.0150 |
| TFE3             | 1.12 | 1.55E-02 | 0.0365 |
| TOMM70           | 1.12 | 1.67E-03 | 0.0086 |
| NOC4L            | 1.12 | 1.06E-02 | 0.0279 |
| XPNPEP1          | 1.12 | 2.27E-03 | 0.0102 |
| AMZ2             | 1.12 | 1.55E-03 | 0.0083 |
| UBL7             | 1.12 | 2.80E-03 | 0.0116 |
| TMCO3            | 1.12 | 1.99E-03 | 0.0095 |
| RIC8A            | 1.12 | 3.00E-03 | 0.0122 |
| TGIF2            | 1.12 | 1.88E-03 | 0.0092 |
| HSPB11           | 1.12 | 3.25E-03 | 0.0128 |
| JTB              | 1.12 | 1.95E-03 | 0.0094 |
| ENST000003124050 | 1.12 | 1.25E-02 | 0.0314 |
| KCNAB2           | 1.12 | 2.85E-03 | 0.0118 |
| AEBP1            | 1.12 | 1.74E-02 | 0.0398 |

|                  |      |          |        |
|------------------|------|----------|--------|
| ZNF616           | 1.12 | 7.24E-03 | 0.0215 |
| DSTN             | 1.12 | 1.94E-03 | 0.0094 |
| ZNF511           | 1.12 | 2.97E-03 | 0.0121 |
| SLC25A32         | 1.12 | 5.53E-03 | 0.0180 |
| TCEAL8           | 1.12 | 2.46E-03 | 0.0108 |
| COPB1            | 1.12 | 7.67E-04 | 0.0056 |
| SDHD             | 1.11 | 1.81E-03 | 0.0090 |
| RSL24D1          | 1.11 | 1.02E-03 | 0.0065 |
| AC073529.1       | 1.11 | 1.05E-02 | 0.0277 |
| CRIM1            | 1.11 | 5.71E-03 | 0.0184 |
| EED              | 1.11 | 2.07E-03 | 0.0097 |
| SARS2            | 1.11 | 8.51E-03 | 0.0240 |
| EXOSC1           | 1.11 | 3.50E-03 | 0.0134 |
| CCP110           | 1.11 | 1.80E-03 | 0.0090 |
| PFKFB3           | 1.11 | 1.49E-02 | 0.0356 |
| PPP4C            | 1.11 | 1.39E-03 | 0.0077 |
| ZC3H12D          | 1.11 | 4.31E-03 | 0.0153 |
| FASTKD3          | 1.11 | 6.07E-03 | 0.0192 |
| MTRF1L           | 1.11 | 1.66E-03 | 0.0086 |
| GNL3L            | 1.11 | 5.64E-03 | 0.0183 |
| WDR83OS          | 1.11 | 2.92E-03 | 0.0119 |
| EXOSC7           | 1.11 | 1.96E-03 | 0.0094 |
| ENST000002643121 | 1.11 | 1.50E-03 | 0.0081 |
| DNASE2           | 1.11 | 2.14E-03 | 0.0099 |
| SMIM20           | 1.11 | 2.61E-03 | 0.0112 |
| XYLT2            | 1.11 | 2.29E-03 | 0.0103 |
| NAA50            | 1.11 | 8.35E-03 | 0.0237 |
| ZNF100           | 1.10 | 3.95E-03 | 0.0145 |
| ZNF79            | 1.10 | 2.34E-02 | 0.0492 |
| DDX55            | 1.10 | 3.41E-03 | 0.0131 |
| ENST000003136010 | 1.10 | 3.17E-03 | 0.0126 |
| BMF              | 1.10 | 1.60E-02 | 0.0374 |
| ATP6V1F          | 1.10 | 3.79E-03 | 0.0141 |
| CHMP4B           | 1.10 | 1.89E-03 | 0.0092 |
| ARPC5            | 1.10 | 1.25E-03 | 0.0073 |
| ORC3             | 1.10 | 1.70E-03 | 0.0087 |
| LDAH             | 1.10 | 1.53E-03 | 0.0082 |
| MT-ND4           | 1.10 | 3.58E-03 | 0.0136 |
| ENST000002682061 | 1.10 | 2.50E-03 | 0.0109 |
| EIF2AK2          | 1.10 | 2.75E-03 | 0.0116 |
| BLOC1S2          | 1.10 | 2.06E-03 | 0.0097 |
| TJP2             | 1.10 | 2.34E-03 | 0.0105 |
| DDRKG1           | 1.10 | 1.81E-03 | 0.0090 |
| NME4             | 1.10 | 3.71E-03 | 0.0139 |
| GCN1             | 1.10 | 1.67E-03 | 0.0086 |
| ARF1             | 1.10 | 2.46E-03 | 0.0108 |
| FRG1             | 1.10 | 1.85E-03 | 0.0091 |

|                  |      |          |        |
|------------------|------|----------|--------|
| PFKL             | 1.10 | 1.49E-03 | 0.0081 |
| SLA2             | 1.10 | 3.10E-03 | 0.0124 |
| SLA              | 1.10 | 5.37E-03 | 0.0177 |
| UBA6             | 1.10 | 1.12E-03 | 0.0068 |
| SMN2             | 1.10 | 2.16E-02 | 0.0464 |
| COX5B            | 1.10 | 1.67E-03 | 0.0086 |
| FAM3C2           | 1.10 | 2.28E-02 | 0.0483 |
| SIT1             | 1.10 | 7.14E-03 | 0.0213 |
| AC010132.3       | 1.10 | 1.36E-02 | 0.0332 |
| CENPK            | 1.10 | 3.66E-03 | 0.0138 |
| EIF2AK4          | 1.10 | 1.15E-03 | 0.0070 |
| ENST000002878993 | 1.10 | 5.56E-03 | 0.0181 |
| YIPF5            | 1.10 | 1.61E-03 | 0.0084 |
| ARHGEF2          | 1.10 | 1.54E-03 | 0.0082 |
| POLR2B           | 1.10 | 1.03E-03 | 0.0066 |
| WDR77            | 1.10 | 1.99E-02 | 0.0437 |
| LRRC8B           | 1.10 | 1.27E-03 | 0.0073 |
| ENST000002850934 | 1.09 | 9.50E-03 | 0.0259 |
| SLC4A2           | 1.09 | 4.10E-03 | 0.0148 |
| ENST000002806650 | 1.09 | 1.09E-02 | 0.0285 |
| GPN1             | 1.09 | 3.17E-03 | 0.0126 |
| MGMT             | 1.09 | 3.62E-03 | 0.0137 |
| ENST000002660140 | 1.09 | 7.75E-03 | 0.0226 |
| PANX1            | 1.09 | 6.71E-03 | 0.0205 |
| PRKCI            | 1.09 | 2.07E-03 | 0.0097 |
| ANKRD54          | 1.09 | 4.89E-03 | 0.0166 |
| NAE1             | 1.09 | 1.96E-03 | 0.0094 |
| ATP5PO           | 1.09 | 1.96E-03 | 0.0094 |
| GSKIP            | 1.09 | 2.62E-03 | 0.0112 |
| SRA1             | 1.09 | 5.83E-03 | 0.0187 |
| MFSD5            | 1.09 | 9.82E-03 | 0.0264 |
| DLG4             | 1.09 | 5.76E-03 | 0.0185 |
| NEU1             | 1.09 | 2.31E-03 | 0.0104 |
| MMAB             | 1.09 | 3.44E-03 | 0.0132 |
| ELAC2            | 1.09 | 4.34E-03 | 0.0154 |
| ENST000001849560 | 1.09 | 6.21E-03 | 0.0194 |
| TNFSF15          | 1.09 | 2.29E-02 | 0.0483 |
| CCDC71L          | 1.09 | 3.18E-03 | 0.0126 |
| ENST000002549502 | 1.09 | 6.79E-03 | 0.0206 |
| EXOSC3           | 1.09 | 2.36E-03 | 0.0105 |
| RMDN1            | 1.09 | 1.38E-03 | 0.0077 |
| TRUB1            | 1.09 | 3.70E-03 | 0.0139 |
| CAPZA1           | 1.09 | 1.25E-03 | 0.0073 |
| DCAF7            | 1.09 | 1.88E-03 | 0.0092 |
| FECH             | 1.08 | 2.69E-03 | 0.0114 |
| ZNF443           | 1.08 | 5.82E-03 | 0.0186 |
| PEF1             | 1.08 | 2.21E-03 | 0.0101 |

|                  |      |          |        |
|------------------|------|----------|--------|
| ECH1             | 1.08 | 1.62E-03 | 0.0085 |
| WDR4             | 1.08 | 8.14E-03 | 0.0233 |
| KRT8P12          | 1.08 | 2.26E-02 | 0.0478 |
| USP49            | 1.08 | 1.07E-02 | 0.0280 |
| NDUFA4           | 1.08 | 3.54E-03 | 0.0135 |
| BIVM             | 1.08 | 4.25E-03 | 0.0152 |
| UPF3B            | 1.08 | 3.16E-03 | 0.0125 |
| EXD2             | 1.08 | 2.22E-03 | 0.0101 |
| SNORA73A         | 1.08 | 1.44E-02 | 0.0348 |
| TXNL4A           | 1.08 | 2.97E-03 | 0.0121 |
| RBM19            | 1.08 | 3.52E-03 | 0.0134 |
| SIL1             | 1.08 | 2.66E-03 | 0.0113 |
| ENST000003253663 | 1.08 | 1.75E-02 | 0.0398 |
| ENST000003142892 | 1.08 | 1.59E-03 | 0.0084 |
| ARMH1            | 1.08 | 1.36E-02 | 0.0333 |
| ENST000003409410 | 1.08 | 3.24E-03 | 0.0127 |
| PAPSS1           | 1.08 | 2.12E-03 | 0.0099 |
| ENST000002168071 | 1.08 | 1.35E-02 | 0.0332 |
| SNRNP27          | 1.08 | 1.97E-03 | 0.0094 |
| NDUFA2           | 1.08 | 3.32E-03 | 0.0129 |
| MLX              | 1.08 | 3.53E-03 | 0.0134 |
| RPS10-NUDT3      | 1.08 | 4.37E-03 | 0.0155 |
| TMEM53           | 1.07 | 1.22E-02 | 0.0308 |
| POLR2D           | 1.07 | 2.96E-03 | 0.0121 |
| BABAM2           | 1.07 | 4.02E-03 | 0.0146 |
| TBC1D31          | 1.07 | 2.76E-03 | 0.0116 |
| MTPAP            | 1.07 | 7.75E-03 | 0.0226 |
| PIGU             | 1.07 | 8.22E-03 | 0.0234 |
| ENST000003814010 | 1.07 | 4.19E-03 | 0.0151 |
| PMPCA            | 1.07 | 3.22E-03 | 0.0127 |
| POLR2K           | 1.07 | 4.58E-03 | 0.0159 |
| INPPL1           | 1.07 | 2.93E-03 | 0.0120 |
| ANKLE2           | 1.07 | 1.04E-03 | 0.0066 |
| TM7SF2           | 1.07 | 6.85E-03 | 0.0208 |
| ARPC2            | 1.07 | 1.38E-03 | 0.0077 |
| TM9SF4           | 1.07 | 2.60E-03 | 0.0112 |
| ENST000000081803 | 1.07 | 6.76E-03 | 0.0206 |
| ENST000002658661 | 1.07 | 9.11E-03 | 0.0252 |
| UQCR10           | 1.07 | 4.52E-03 | 0.0158 |
| PRDX6            | 1.07 | 1.67E-03 | 0.0086 |
| GBP2             | 1.07 | 1.77E-03 | 0.0089 |
| IFITM3           | 1.07 | 1.30E-02 | 0.0323 |
| ENST000003248682 | 1.07 | 2.73E-03 | 0.0115 |
| CAP1             | 1.07 | 1.13E-03 | 0.0069 |
| AC022415.1       | 1.07 | 2.26E-02 | 0.0478 |
| SVIL-AS1         | 1.07 | 3.50E-03 | 0.0134 |
| CSTF3            | 1.07 | 3.75E-03 | 0.0140 |

|                  |      |          |        |
|------------------|------|----------|--------|
| ENST000003358952 | 1.07 | 2.93E-03 | 0.0120 |
| PI4K2A           | 1.06 | 1.48E-02 | 0.0353 |
| ANAPC7           | 1.06 | 6.52E-03 | 0.0201 |
| CLNS1A           | 1.06 | 1.06E-03 | 0.0066 |
| DNAJC6           | 1.06 | 2.38E-02 | 0.0497 |
| ATP1A1-AS1       | 1.06 | 1.32E-02 | 0.0327 |
| PTGES3P2         | 1.06 | 2.37E-02 | 0.0496 |
| RF00004.10       | 1.06 | 1.56E-03 | 0.0083 |
| RF00004.11       | 1.06 | 1.56E-03 | 0.0083 |
| RF00004.12       | 1.06 | 1.56E-03 | 0.0083 |
| RF00004.15       | 1.06 | 1.56E-03 | 0.0083 |
| RF00004.16       | 1.06 | 1.56E-03 | 0.0083 |
| RF00004.19       | 1.06 | 1.56E-03 | 0.0083 |
| RF00004.2        | 1.06 | 1.56E-03 | 0.0083 |
| RF00004.3        | 1.06 | 1.56E-03 | 0.0083 |
| RF00004.5        | 1.06 | 1.56E-03 | 0.0083 |
| RF00004.9        | 1.06 | 1.56E-03 | 0.0083 |
| RNU2-1           | 1.06 | 1.56E-03 | 0.0083 |
| BLVRA            | 1.06 | 4.33E-03 | 0.0154 |
| CHST3            | 1.06 | 2.15E-02 | 0.0463 |
| GTF2H2B          | 1.06 | 1.73E-02 | 0.0396 |
| ENST000002964110 | 1.06 | 1.99E-03 | 0.0095 |
| CRTAP            | 1.06 | 4.13E-03 | 0.0149 |
| MCRIP1           | 1.06 | 3.87E-03 | 0.0143 |
| ENST000002225110 | 1.06 | 2.96E-03 | 0.0121 |
| RPS2             | 1.06 | 2.07E-03 | 0.0097 |
| FAM20B           | 1.06 | 2.42E-03 | 0.0107 |
| ESF1             | 1.06 | 2.26E-03 | 0.0102 |
| C8orf33          | 1.06 | 2.73E-03 | 0.0115 |
| NDUFC1           | 1.06 | 5.30E-03 | 0.0175 |
| CORO1A           | 1.06 | 1.60E-03 | 0.0084 |
| TRIAP1           | 1.06 | 2.39E-03 | 0.0106 |
| EIF1AX           | 1.06 | 8.44E-03 | 0.0239 |
| NUDT19           | 1.06 | 2.65E-03 | 0.0113 |
| PAXIP1           | 1.06 | 2.85E-03 | 0.0118 |
| GTDC1            | 1.06 | 6.20E-03 | 0.0194 |
| KPNA3            | 1.06 | 1.63E-03 | 0.0085 |
| ATP5MPL          | 1.06 | 2.67E-03 | 0.0113 |
| MIIP             | 1.06 | 2.91E-03 | 0.0119 |
| NSUN5            | 1.06 | 3.37E-03 | 0.0131 |
| NELFE            | 1.06 | 6.72E-03 | 0.0205 |
| MRPL44           | 1.06 | 1.94E-03 | 0.0094 |
| TCEAL4           | 1.06 | 1.31E-02 | 0.0324 |
| CFAP298          | 1.06 | 8.27E-03 | 0.0236 |
| MRPL57           | 1.06 | 5.45E-03 | 0.0178 |
| ENST000003283920 | 1.06 | 9.24E-03 | 0.0254 |
| CAND1            | 1.06 | 9.87E-04 | 0.0064 |



|                  |      |          |        |
|------------------|------|----------|--------|
| SMUG1            | 1.06 | 4.54E-03 | 0.0158 |
| MALSU1           | 1.05 | 3.38E-03 | 0.0131 |
| TYW3             | 1.05 | 1.89E-02 | 0.0422 |
| RRP8             | 1.05 | 6.55E-03 | 0.0201 |
| UQCRC2           | 1.05 | 1.98E-03 | 0.0095 |
| E2F4             | 1.05 | 2.76E-03 | 0.0116 |
| SART1            | 1.05 | 3.15E-03 | 0.0125 |
| DDX23            | 1.05 | 2.41E-03 | 0.0107 |
| ACO1             | 1.05 | 2.80E-03 | 0.0116 |
| CDC37            | 1.05 | 5.99E-03 | 0.0190 |
| ENST000003120490 | 1.05 | 1.14E-02 | 0.0293 |
| SS18L2           | 1.05 | 1.29E-02 | 0.0320 |
| POC5             | 1.05 | 2.70E-03 | 0.0114 |
| CEP295           | 1.05 | 4.90E-03 | 0.0166 |
| ZDHC18           | 1.05 | 2.55E-03 | 0.0111 |
| GSR              | 1.05 | 3.31E-03 | 0.0129 |
| STX10            | 1.05 | 1.99E-03 | 0.0095 |
| AL157394.1       | 1.05 | 2.25E-02 | 0.0477 |
| LXN              | 1.05 | 4.89E-03 | 0.0166 |
| XPO1             | 1.05 | 4.56E-03 | 0.0159 |
| TTC27            | 1.05 | 3.37E-03 | 0.0131 |
| ATG4C            | 1.05 | 2.58E-03 | 0.0111 |
| LIG1             | 1.05 | 3.88E-03 | 0.0143 |
| STAT3            | 1.05 | 1.00E-02 | 0.0269 |
| HIST1H1D         | 1.05 | 2.36E-03 | 0.0105 |
| GTPBP2           | 1.05 | 2.08E-02 | 0.0451 |
| MTA2             | 1.05 | 1.69E-03 | 0.0087 |
| ENST000001993890 | 1.05 | 2.17E-03 | 0.0100 |
| ALDH6A1          | 1.05 | 7.62E-03 | 0.0223 |
| PPME1            | 1.04 | 7.82E-03 | 0.0227 |
| ACOX1            | 1.04 | 5.69E-03 | 0.0184 |
| APOPT1           | 1.04 | 2.44E-03 | 0.0108 |
| IPP              | 1.04 | 9.02E-03 | 0.0250 |
| RLN2             | 1.04 | 1.02E-02 | 0.0271 |
| KIF21A           | 1.04 | 3.98E-03 | 0.0145 |
| NEIL2            | 1.04 | 4.01E-03 | 0.0146 |
| DDX18            | 1.04 | 3.85E-03 | 0.0142 |
| PUF60            | 1.04 | 1.60E-02 | 0.0373 |
| DAPP1            | 1.04 | 5.25E-03 | 0.0174 |
| SGPP2            | 1.04 | 6.19E-03 | 0.0194 |
| ZNF486           | 1.04 | 1.92E-03 | 0.0093 |
| MYBBP1A          | 1.04 | 4.41E-03 | 0.0155 |
| SMAD1            | 1.04 | 1.63E-02 | 0.0378 |
| ZNF594           | 1.04 | 1.34E-02 | 0.0330 |
| CPD              | 1.04 | 6.30E-03 | 0.0196 |
| TMED2            | 1.04 | 1.84E-03 | 0.0091 |
| RTN4IP1          | 1.04 | 6.58E-03 | 0.0202 |

|                  |      |          |        |
|------------------|------|----------|--------|
| DBNDD2           | 1.04 | 6.37E-03 | 0.0197 |
| NAA10            | 1.04 | 3.71E-03 | 0.0139 |
| TDP1             | 1.04 | 1.56E-03 | 0.0083 |
| CAMK2D           | 1.04 | 1.56E-03 | 0.0083 |
| MROH8            | 1.04 | 2.29E-02 | 0.0483 |
| ALKBH3           | 1.04 | 8.03E-03 | 0.0231 |
| TPM3             | 1.04 | 4.63E-03 | 0.0160 |
| FLNA             | 1.04 | 1.01E-03 | 0.0065 |
| PPP2CB           | 1.04 | 4.93E-03 | 0.0167 |
| DFFA             | 1.04 | 9.39E-03 | 0.0257 |
| AGAP5            | 1.04 | 8.83E-03 | 0.0246 |
| RIOK2            | 1.04 | 3.90E-03 | 0.0143 |
| STAT1            | 1.04 | 8.47E-03 | 0.0239 |
| ALKBH1           | 1.04 | 3.38E-03 | 0.0131 |
| ACSL4            | 1.04 | 7.37E-03 | 0.0218 |
| WDR41            | 1.04 | 1.79E-03 | 0.0090 |
| NMD3             | 1.04 | 1.50E-03 | 0.0081 |
| SYNCRIP          | 1.04 | 1.57E-02 | 0.0370 |
| SEC23IP          | 1.04 | 2.53E-03 | 0.0110 |
| WDR62            | 1.04 | 1.80E-02 | 0.0407 |
| KDELR1           | 1.04 | 2.06E-02 | 0.0448 |
| SLC30A5          | 1.04 | 4.98E-03 | 0.0168 |
| LTV1             | 1.03 | 1.30E-02 | 0.0322 |
| AL161891.1       | 1.03 | 3.82E-03 | 0.0141 |
| MPC2             | 1.03 | 3.65E-03 | 0.0138 |
| EDARADD          | 1.03 | 2.31E-02 | 0.0486 |
| SNX4             | 1.03 | 3.89E-03 | 0.0143 |
| ENST000003249321 | 1.03 | 1.32E-03 | 0.0075 |
| GNAI3            | 1.03 | 1.57E-03 | 0.0083 |
| KRI1             | 1.03 | 3.24E-03 | 0.0127 |
| TRAPPC4          | 1.03 | 1.65E-02 | 0.0383 |
| PTGES2           | 1.03 | 1.05E-02 | 0.0276 |
| DUSP2            | 1.03 | 2.63E-03 | 0.0113 |
| CRKL             | 1.03 | 1.32E-03 | 0.0075 |
| VTA1             | 1.03 | 2.79E-03 | 0.0116 |
| MBD2             | 1.03 | 7.75E-03 | 0.0226 |
| TTI1             | 1.03 | 2.38E-03 | 0.0106 |
| EIF3D            | 1.03 | 1.78E-03 | 0.0089 |
| ADCK2            | 1.03 | 4.19E-03 | 0.0150 |
| IFT122           | 1.03 | 4.30E-03 | 0.0153 |
| CEP250           | 1.03 | 1.96E-03 | 0.0094 |
| ENST000003583141 | 1.03 | 9.98E-03 | 0.0267 |
| C22orf46         | 1.03 | 4.33E-03 | 0.0154 |
| TRIM65           | 1.03 | 7.43E-03 | 0.0220 |
| ZFP57            | 1.03 | 1.21E-02 | 0.0308 |
| AUH              | 1.03 | 9.57E-03 | 0.0260 |
| EXOSC2           | 1.03 | 2.20E-03 | 0.0101 |

|                  |      |          |        |
|------------------|------|----------|--------|
| NIPSNAP2         | 1.03 | 3.31E-03 | 0.0129 |
| SART3            | 1.03 | 2.25E-03 | 0.0102 |
| TMEM14B          | 1.03 | 4.40E-03 | 0.0155 |
| KDSR             | 1.03 | 1.84E-03 | 0.0091 |
| JARID2           | 1.03 | 2.62E-03 | 0.0112 |
| FAM104B          | 1.03 | 9.43E-03 | 0.0257 |
| VASP             | 1.02 | 4.81E-03 | 0.0164 |
| MED19            | 1.02 | 1.08E-02 | 0.0282 |
| ENST000002642540 | 1.02 | 1.31E-02 | 0.0324 |
| MRGBP            | 1.02 | 3.37E-03 | 0.0131 |
| MYL6             | 1.02 | 7.28E-03 | 0.0216 |
| RWDD4            | 1.02 | 5.32E-03 | 0.0175 |
| ENST000002678840 | 1.02 | 1.36E-02 | 0.0332 |
| MAK16            | 1.02 | 1.24E-02 | 0.0311 |
| LIG4             | 1.02 | 5.97E-03 | 0.0190 |
| GANAB            | 1.02 | 2.84E-03 | 0.0117 |
| ENST000003311340 | 1.02 | 8.04E-03 | 0.0231 |
| TRUB2            | 1.02 | 1.69E-02 | 0.0389 |
| HNRNPL           | 1.02 | 1.95E-03 | 0.0094 |
| SNHG12           | 1.02 | 4.59E-03 | 0.0159 |
| PLIN2            | 1.02 | 6.49E-03 | 0.0200 |
| GAS5             | 1.02 | 1.94E-03 | 0.0094 |
| NCKAP1L          | 1.02 | 1.57E-03 | 0.0083 |
| OXSR1            | 1.02 | 4.89E-03 | 0.0166 |
| ZNF267           | 1.02 | 5.19E-03 | 0.0173 |
| STK26            | 1.02 | 1.51E-03 | 0.0081 |
| QSOX1            | 1.02 | 8.21E-03 | 0.0234 |
| NDUFB1           | 1.02 | 6.49E-03 | 0.0200 |
| BTBD1            | 1.02 | 1.70E-03 | 0.0087 |
| EAF2             | 1.02 | 2.14E-02 | 0.0460 |
| METTL6           | 1.02 | 6.20E-03 | 0.0194 |
| LETM2            | 1.02 | 6.18E-03 | 0.0194 |
| NPRL3            | 1.02 | 2.22E-02 | 0.0473 |
| PTGR2            | 1.02 | 5.81E-03 | 0.0186 |
| OTUD6B           | 1.02 | 4.95E-03 | 0.0167 |
| CIAPIN1          | 1.02 | 6.87E-03 | 0.0208 |
| CLTB             | 1.02 | 1.58E-02 | 0.0371 |
| SRI              | 1.02 | 1.85E-03 | 0.0091 |
| THYN1            | 1.02 | 1.68E-03 | 0.0086 |
| DUS2             | 1.02 | 1.45E-02 | 0.0350 |
| TSPAN5           | 1.02 | 2.69E-03 | 0.0114 |
| CTSZ             | 1.01 | 7.14E-03 | 0.0213 |
| CHST2            | 1.01 | 6.74E-03 | 0.0205 |
| MAT2A            | 1.01 | 1.87E-02 | 0.0419 |
| SERF2            | 1.01 | 2.52E-03 | 0.0110 |
| ENST000003049920 | 1.01 | 3.00E-03 | 0.0122 |
| OSGIN2           | 1.01 | 3.32E-03 | 0.0129 |

|                  |      |          |        |
|------------------|------|----------|--------|
| SLC9B2           | 1.01 | 4.33E-03 | 0.0154 |
| MGAT2            | 1.01 | 3.19E-03 | 0.0126 |
| SLC25A44         | 1.01 | 2.09E-02 | 0.0452 |
| MIOS             | 1.01 | 1.97E-03 | 0.0095 |
| VPS72            | 1.01 | 2.45E-03 | 0.0108 |
| ENST000003129620 | 1.01 | 2.73E-03 | 0.0115 |
| IMPAD1           | 1.01 | 2.03E-03 | 0.0096 |
| COX6C            | 1.01 | 2.31E-03 | 0.0104 |
| HSP90B1          | 1.01 | 1.84E-03 | 0.0091 |
| SH3BGR           | 1.01 | 2.27E-02 | 0.0481 |
| TOR1B            | 1.01 | 2.75E-03 | 0.0115 |
| ENST000002803302 | 1.01 | 1.28E-02 | 0.0319 |
| UCHL3            | 1.01 | 3.32E-03 | 0.0129 |
| CCDC124          | 1.01 | 8.20E-03 | 0.0234 |
| FBXO4            | 1.01 | 9.93E-03 | 0.0266 |
| C6orf62          | 1.01 | 2.65E-03 | 0.0113 |
| ENST000002288251 | 1.00 | 4.84E-03 | 0.0165 |
| KIAA0100         | 1.00 | 3.73E-03 | 0.0140 |
| GTF2E2           | 1.00 | 3.34E-03 | 0.0130 |
| TRIM27           | 1.00 | 2.17E-03 | 0.0100 |
| CD2              | 1.00 | 2.07E-03 | 0.0097 |
| LINC00526        | 1.00 | 1.95E-02 | 0.0431 |
| NDOR1            | 1.00 | 1.40E-02 | 0.0340 |
| NDUFS7           | 1.00 | 9.70E-03 | 0.0262 |
| LPCAT1           | 1.00 | 2.23E-02 | 0.0475 |
| EIF4E            | 1.00 | 5.39E-03 | 0.0177 |
| PRMT6            | 1.00 | 4.69E-03 | 0.0162 |
| BICDL1           | 1.00 | 8.21E-03 | 0.0234 |
| FAAP100          | 1.00 | 1.03E-02 | 0.0272 |
| PEX3             | 1.00 | 2.63E-03 | 0.0113 |
| SPPL2A           | 1.00 | 4.31E-03 | 0.0153 |
| POLR3A           | 1.00 | 2.84E-03 | 0.0117 |
| CEP44            | 1.00 | 2.77E-03 | 0.0116 |
| MYO1G            | 1.00 | 1.90E-03 | 0.0093 |
| GPR107           | 1.00 | 4.68E-03 | 0.0162 |
| RSL1D1           | 1.00 | 4.95E-03 | 0.0167 |
| ZNF691           | 1.00 | 9.47E-03 | 0.0258 |
| GTF2F2           | 1.00 | 6.48E-03 | 0.0200 |
| NUCKS1           | 1.00 | 2.41E-03 | 0.0107 |
| SDHAF4           | 1.00 | 4.74E-03 | 0.0163 |
| TOLLIP           | 1.00 | 1.07E-02 | 0.0281 |
| CANT1            | 1.00 | 3.80E-03 | 0.0141 |
| TOP1             | 1.00 | 2.06E-02 | 0.0449 |
| GFER             | 0.99 | 6.84E-03 | 0.0207 |
| SCO1             | 0.99 | 3.45E-03 | 0.0132 |
| IL32             | 0.99 | 6.34E-03 | 0.0197 |
| ASNSD1           | 0.99 | 2.79E-03 | 0.0116 |

|                  |      |          |        |
|------------------|------|----------|--------|
| TMEM141          | 0.99 | 2.27E-02 | 0.0481 |
| PSMC5            | 0.99 | 6.85E-03 | 0.0208 |
| MIR17HG          | 0.99 | 3.13E-03 | 0.0125 |
| KRT18            | 0.99 | 1.76E-02 | 0.0400 |
| ENST000003134211 | 0.99 | 2.42E-03 | 0.0107 |
| UTP4             | 0.99 | 5.10E-03 | 0.0171 |
| BTN2A2           | 0.99 | 6.66E-03 | 0.0204 |
| DLEU2            | 0.99 | 4.55E-03 | 0.0159 |
| COTL1            | 0.99 | 1.82E-03 | 0.0091 |
| PSMD9            | 0.99 | 2.46E-03 | 0.0108 |
| PMM1             | 0.99 | 8.07E-03 | 0.0232 |
| SERAC1           | 0.99 | 1.15E-02 | 0.0295 |
| RNF215           | 0.99 | 8.44E-03 | 0.0239 |
| EXOSC9           | 0.99 | 2.88E-03 | 0.0118 |
| LINC01588        | 0.99 | 4.39E-03 | 0.0155 |
| BAG2             | 0.99 | 3.19E-03 | 0.0126 |
| NUP133           | 0.99 | 3.02E-03 | 0.0122 |
| AGO2             | 0.99 | 1.04E-02 | 0.0275 |
| MED24            | 0.99 | 4.36E-03 | 0.0154 |
| PGS1             | 0.99 | 1.64E-02 | 0.0381 |
| CLPX             | 0.99 | 1.87E-03 | 0.0092 |
| PROCR            | 0.99 | 2.23E-02 | 0.0475 |
| TNFRSF10B        | 0.98 | 7.17E-03 | 0.0214 |
| JAGN1            | 0.98 | 8.54E-03 | 0.0241 |
| TESK1            | 0.98 | 1.26E-02 | 0.0316 |
| DHX58            | 0.98 | 1.48E-02 | 0.0355 |
| SLAMF7           | 0.98 | 1.38E-02 | 0.0336 |
| HOMEZ            | 0.98 | 7.29E-03 | 0.0217 |
| ZNF395           | 0.98 | 8.01E-03 | 0.0231 |
| KCTD6            | 0.98 | 6.12E-03 | 0.0193 |
| MTX2             | 0.98 | 2.37E-02 | 0.0496 |
| DNAJC8           | 0.98 | 3.65E-03 | 0.0138 |
| KAT2A            | 0.98 | 1.37E-02 | 0.0334 |
| GBAP1            | 0.98 | 1.66E-02 | 0.0384 |
| BNIP1            | 0.98 | 8.92E-03 | 0.0248 |
| NET1             | 0.98 | 4.00E-03 | 0.0146 |
| VEZT             | 0.98 | 3.45E-03 | 0.0132 |
| COMMD5           | 0.98 | 5.85E-03 | 0.0187 |
| SPAG7            | 0.98 | 3.04E-03 | 0.0122 |
| NFYB             | 0.98 | 8.21E-03 | 0.0234 |
| RRS1             | 0.98 | 6.24E-03 | 0.0195 |
| ATP5MC2          | 0.98 | 3.18E-03 | 0.0126 |
| GCH1             | 0.98 | 2.14E-03 | 0.0099 |
| ENST000002219220 | 0.98 | 4.04E-03 | 0.0147 |
| DYNC1LI1         | 0.98 | 4.82E-03 | 0.0165 |
| ENST000003031271 | 0.98 | 2.18E-03 | 0.0100 |
| RADX             | 0.98 | 4.60E-03 | 0.0160 |

|                  |      |          |        |
|------------------|------|----------|--------|
| TMEM165          | 0.98 | 7.52E-03 | 0.0221 |
| MT-ND4L          | 0.98 | 3.98E-03 | 0.0145 |
| BRD8             | 0.98 | 3.59E-03 | 0.0136 |
| GPATCH11         | 0.98 | 3.52E-03 | 0.0134 |
| YWHAE            | 0.98 | 5.00E-03 | 0.0168 |
| EZR              | 0.98 | 1.06E-02 | 0.0279 |
| ZFYVE21          | 0.98 | 9.00E-03 | 0.0250 |
| ENST000003116351 | 0.98 | 1.74E-02 | 0.0398 |
| MUM1             | 0.98 | 6.85E-03 | 0.0208 |
| ENST000003475190 | 0.98 | 2.22E-02 | 0.0473 |
| NDUFA9           | 0.98 | 2.65E-03 | 0.0113 |
| REXO4            | 0.97 | 4.22E-03 | 0.0152 |
| EIF4G3           | 0.97 | 6.28E-03 | 0.0195 |
| TRIM16           | 0.97 | 4.57E-03 | 0.0159 |
| ARHGAP31         | 0.97 | 7.50E-03 | 0.0221 |
| MDH1             | 0.97 | 3.41E-03 | 0.0131 |
| ATP6V1E1         | 0.97 | 4.68E-03 | 0.0162 |
| TMEM216          | 0.97 | 8.65E-03 | 0.0243 |
| RPUSD3           | 0.97 | 7.61E-03 | 0.0223 |
| GNB1             | 0.97 | 1.61E-03 | 0.0084 |
| ATF1             | 0.97 | 5.13E-03 | 0.0171 |
| KCTD20           | 0.97 | 2.14E-03 | 0.0099 |
| FBRS             | 0.97 | 1.03E-02 | 0.0274 |
| THRAP3           | 0.97 | 2.59E-03 | 0.0112 |
| PQBP1            | 0.97 | 9.88E-03 | 0.0265 |
| ACSF2            | 0.97 | 1.53E-02 | 0.0362 |
| SLC39A6          | 0.97 | 8.20E-03 | 0.0234 |
| TIMM9            | 0.97 | 1.39E-02 | 0.0339 |
| YIPF1            | 0.97 | 4.48E-03 | 0.0157 |
| NCBP2            | 0.97 | 5.35E-03 | 0.0176 |
| EEF2             | 0.97 | 1.10E-02 | 0.0287 |
| AASDHPPT         | 0.97 | 5.72E-03 | 0.0184 |
| ENST000003148302 | 0.97 | 5.64E-03 | 0.0183 |
| LIMK2            | 0.97 | 3.87E-03 | 0.0143 |
| LAMTOR5          | 0.97 | 3.99E-03 | 0.0145 |
| FAM50A           | 0.97 | 9.66E-03 | 0.0262 |
| NUP54            | 0.97 | 3.61E-03 | 0.0137 |
| ENST000003312421 | 0.97 | 4.79E-03 | 0.0164 |
| PELP1            | 0.97 | 1.68E-02 | 0.0387 |
| PTER             | 0.96 | 2.40E-03 | 0.0106 |
| EFHD2            | 0.96 | 7.26E-03 | 0.0216 |
| THAP5            | 0.96 | 3.42E-03 | 0.0132 |
| PTPMT1           | 0.96 | 5.53E-03 | 0.0180 |
| ELOF1            | 0.96 | 7.38E-03 | 0.0218 |
| TMEM263          | 0.96 | 2.38E-03 | 0.0106 |
| CERS2            | 0.96 | 5.25E-03 | 0.0174 |
| MAF              | 0.96 | 2.07E-02 | 0.0449 |

|                  |      |          |        |
|------------------|------|----------|--------|
| MSTO1            | 0.96 | 8.37E-03 | 0.0237 |
| ZNF524           | 0.96 | 1.63E-02 | 0.0379 |
| LARS             | 0.96 | 2.15E-03 | 0.0099 |
| STX6             | 0.96 | 5.27E-03 | 0.0174 |
| PEX2             | 0.96 | 2.22E-03 | 0.0101 |
| YKT6             | 0.96 | 4.52E-03 | 0.0158 |
| BRCC3            | 0.96 | 5.66E-03 | 0.0183 |
| SPINT2           | 0.96 | 1.11E-02 | 0.0289 |
| ZNF436           | 0.96 | 6.59E-03 | 0.0202 |
| NR2C2AP          | 0.96 | 1.22E-02 | 0.0308 |
| RGS10            | 0.96 | 2.79E-03 | 0.0116 |
| ENST000003318250 | 0.96 | 1.49E-03 | 0.0081 |
| BAP1             | 0.96 | 2.79E-03 | 0.0116 |
| NXT2             | 0.96 | 1.36E-02 | 0.0332 |
| ENST000002900370 | 0.96 | 2.37E-02 | 0.0496 |
| COPS4            | 0.96 | 6.03E-03 | 0.0191 |
| B3GAT3           | 0.96 | 8.05E-03 | 0.0231 |
| PSMB4            | 0.96 | 5.62E-03 | 0.0182 |
| ZNF696           | 0.96 | 1.14E-02 | 0.0293 |
| MTAP             | 0.96 | 6.38E-03 | 0.0198 |
| ENST000002618661 | 0.96 | 2.28E-03 | 0.0103 |
| STRBP            | 0.96 | 5.37E-03 | 0.0177 |
| SOCS7            | 0.96 | 7.15E-03 | 0.0213 |
| ENST000002829900 | 0.96 | 8.62E-03 | 0.0242 |
| EXOC5            | 0.96 | 4.00E-03 | 0.0146 |
| CCDC61           | 0.96 | 1.79E-02 | 0.0405 |
| PAAF1            | 0.96 | 4.08E-03 | 0.0148 |
| NBN              | 0.96 | 4.29E-03 | 0.0153 |
| CD2BP2           | 0.96 | 1.02E-02 | 0.0271 |
| PPP2R3B          | 0.96 | 8.46E-03 | 0.0239 |
| BCOR             | 0.96 | 6.26E-03 | 0.0195 |
| ENST000002726383 | 0.96 | 1.71E-03 | 0.0087 |
| CAB39L           | 0.96 | 5.58E-03 | 0.0181 |
| ADAR             | 0.95 | 5.88E-03 | 0.0188 |
| PIAS4            | 0.95 | 7.59E-03 | 0.0223 |
| LY6E             | 0.95 | 1.38E-02 | 0.0337 |
| DCAKD            | 0.95 | 1.50E-02 | 0.0356 |
| NDUFA12          | 0.95 | 3.77E-03 | 0.0140 |
| TMEM135          | 0.95 | 1.71E-02 | 0.0393 |
| GTF2H1           | 0.95 | 6.94E-03 | 0.0209 |
| BCL10            | 0.95 | 4.67E-03 | 0.0161 |
| ZFAS1            | 0.95 | 3.52E-03 | 0.0134 |
| AATF             | 0.95 | 6.36E-03 | 0.0197 |
| WDR92            | 0.95 | 9.12E-03 | 0.0252 |
| GOLGA2           | 0.95 | 3.74E-03 | 0.0140 |
| DNAJC14          | 0.95 | 1.09E-02 | 0.0284 |
| GNA12            | 0.95 | 9.26E-03 | 0.0254 |

|                  |      |          |        |
|------------------|------|----------|--------|
| BRAT1            | 0.95 | 6.09E-03 | 0.0192 |
| NOA1             | 0.95 | 6.32E-03 | 0.0196 |
| MRPL27           | 0.95 | 5.26E-03 | 0.0174 |
| NCK1-DT          | 0.95 | 1.73E-02 | 0.0395 |
| MAP3K11          | 0.95 | 2.26E-02 | 0.0478 |
| OAT              | 0.95 | 5.47E-03 | 0.0179 |
| PSMB10           | 0.95 | 1.27E-02 | 0.0318 |
| TMEM64           | 0.95 | 7.81E-03 | 0.0227 |
| IL10RB           | 0.94 | 7.76E-03 | 0.0226 |
| MIS12            | 0.94 | 2.76E-03 | 0.0116 |
| HMGB1            | 0.94 | 1.76E-02 | 0.0400 |
| DHX34            | 0.94 | 6.69E-03 | 0.0204 |
| FIG4             | 0.94 | 3.25E-03 | 0.0128 |
| DHX16            | 0.94 | 4.71E-03 | 0.0162 |
| ARL8B            | 0.94 | 2.88E-03 | 0.0118 |
| FUNDC1           | 0.94 | 6.33E-03 | 0.0196 |
| MCCC1            | 0.94 | 6.22E-03 | 0.0194 |
| MOCS3            | 0.94 | 2.08E-02 | 0.0452 |
| RRP36            | 0.94 | 1.83E-02 | 0.0413 |
| TSPAN17          | 0.94 | 6.12E-03 | 0.0192 |
| SNAPC3           | 0.94 | 4.02E-03 | 0.0146 |
| CAB39            | 0.94 | 4.33E-03 | 0.0154 |
| SLC39A9          | 0.94 | 2.95E-03 | 0.0120 |
| MPND             | 0.94 | 2.20E-02 | 0.0470 |
| EIF2S3           | 0.94 | 2.70E-03 | 0.0114 |
| MED1             | 0.94 | 3.14E-03 | 0.0125 |
| CPT2             | 0.94 | 4.90E-03 | 0.0166 |
| BPNT1            | 0.94 | 1.09E-02 | 0.0285 |
| CXorf40A         | 0.94 | 8.52E-03 | 0.0240 |
| MTPN             | 0.94 | 3.81E-03 | 0.0141 |
| SNU13            | 0.94 | 4.46E-03 | 0.0156 |
| SRP19            | 0.94 | 4.29E-03 | 0.0153 |
| ENST000002196891 | 0.93 | 7.76E-03 | 0.0226 |
| PLEKHJ1          | 0.93 | 5.33E-03 | 0.0176 |
| MRPL4            | 0.93 | 2.15E-02 | 0.0463 |
| ATP5F1D          | 0.93 | 1.77E-02 | 0.0402 |
| POMT2            | 0.93 | 9.96E-03 | 0.0267 |
| GFM1             | 0.93 | 1.47E-02 | 0.0353 |
| CD79B            | 0.93 | 8.62E-03 | 0.0242 |
| MT-CO3           | 0.93 | 7.12E-03 | 0.0213 |
| DNPEP            | 0.93 | 7.43E-03 | 0.0219 |
| RSPH3            | 0.93 | 1.65E-02 | 0.0383 |
| CENPBD1          | 0.93 | 2.05E-02 | 0.0447 |
| ADK              | 0.93 | 4.94E-03 | 0.0167 |
| SNX12            | 0.93 | 7.86E-03 | 0.0228 |
| ENST000003093401 | 0.93 | 1.06E-02 | 0.0279 |
| Z95115.1         | 0.93 | 1.33E-02 | 0.0329 |



|                  |      |          |        |
|------------------|------|----------|--------|
| GRHPR            | 0.93 | 1.29E-02 | 0.0321 |
| LYRM1            | 0.93 | 4.66E-03 | 0.0161 |
| FBXO22           | 0.93 | 2.52E-03 | 0.0110 |
| ZNF749           | 0.93 | 8.09E-03 | 0.0232 |
| NAT1             | 0.93 | 7.57E-03 | 0.0222 |
| INTS11           | 0.93 | 3.06E-03 | 0.0123 |
| CACNB1           | 0.93 | 2.34E-02 | 0.0491 |
| ACP1             | 0.93 | 3.17E-03 | 0.0126 |
| SAMM50           | 0.93 | 8.91E-03 | 0.0248 |
| RILPL2           | 0.93 | 1.30E-02 | 0.0323 |
| ENST000002636720 | 0.93 | 1.33E-02 | 0.0327 |
| PIM2             | 0.92 | 1.34E-02 | 0.0330 |
| HSBP1            | 0.92 | 4.46E-03 | 0.0156 |
| ENST000003057470 | 0.92 | 2.25E-02 | 0.0477 |
| B4GALT3          | 0.92 | 5.30E-03 | 0.0175 |
| UBL5             | 0.92 | 4.07E-03 | 0.0148 |
| RXYLT1           | 0.92 | 1.49E-02 | 0.0356 |
| ZNF391           | 0.92 | 1.89E-02 | 0.0422 |
| POT1             | 0.92 | 3.61E-03 | 0.0137 |
| TMEM39A          | 0.92 | 3.01E-03 | 0.0122 |
| SNORA65          | 0.92 | 2.12E-02 | 0.0457 |
| LBR              | 0.92 | 4.07E-03 | 0.0147 |
| GNE              | 0.92 | 3.05E-03 | 0.0123 |
| PPIB             | 0.92 | 6.39E-03 | 0.0198 |
| ARF3             | 0.92 | 6.82E-03 | 0.0207 |
| LYRM4            | 0.92 | 5.20E-03 | 0.0173 |
| SRP14            | 0.92 | 8.74E-03 | 0.0245 |
| KCTD12           | 0.92 | 1.90E-02 | 0.0423 |
| MT-ATP6          | 0.92 | 5.08E-03 | 0.0170 |
| ALG5             | 0.92 | 5.26E-03 | 0.0174 |
| ENST000002300852 | 0.92 | 1.34E-02 | 0.0330 |
| COPA             | 0.92 | 3.30E-03 | 0.0129 |
| AMMECR1L         | 0.92 | 1.31E-02 | 0.0324 |
| COPZ1            | 0.91 | 4.76E-03 | 0.0163 |
| NDUFB9           | 0.91 | 3.82E-03 | 0.0141 |
| FXR1             | 0.91 | 2.17E-03 | 0.0100 |
| KIF5C            | 0.91 | 3.70E-03 | 0.0139 |
| FKBP8            | 0.91 | 6.60E-03 | 0.0202 |
| HIBADH           | 0.91 | 4.74E-03 | 0.0163 |
| YRDC             | 0.91 | 1.11E-02 | 0.0289 |
| ARFGAP3          | 0.91 | 3.83E-03 | 0.0142 |
| AGK              | 0.91 | 5.79E-03 | 0.0186 |
| EIF2B2           | 0.91 | 1.41E-02 | 0.0341 |
| NSUN4            | 0.91 | 6.26E-03 | 0.0195 |
| NF2              | 0.91 | 6.25E-03 | 0.0195 |
| ANKRD9           | 0.91 | 1.49E-02 | 0.0355 |
| TAF13            | 0.91 | 8.21E-03 | 0.0234 |

|                  |      |          |        |
|------------------|------|----------|--------|
| SEM1             | 0.91 | 3.90E-03 | 0.0143 |
| PTPN1            | 0.91 | 1.15E-02 | 0.0296 |
| NPR2             | 0.91 | 1.07E-02 | 0.0281 |
| ENST000002064510 | 0.91 | 2.64E-03 | 0.0113 |
| ATP2A2           | 0.91 | 5.69E-03 | 0.0184 |
| CAPZA2           | 0.91 | 6.27E-03 | 0.0195 |
| EYA3             | 0.91 | 4.73E-03 | 0.0163 |
| INTS9            | 0.91 | 4.90E-03 | 0.0166 |
| RPL8             | 0.91 | 1.46E-02 | 0.0351 |
| PHTF1            | 0.91 | 8.79E-03 | 0.0245 |
| DHX37            | 0.91 | 7.16E-03 | 0.0214 |
| DVL2             | 0.91 | 1.12E-02 | 0.0290 |
| NUPL2            | 0.91 | 7.52E-03 | 0.0221 |
| ECPAS            | 0.91 | 2.32E-03 | 0.0104 |
| CHCHD6           | 0.91 | 1.08E-02 | 0.0283 |
| COLGALT1         | 0.90 | 9.26E-03 | 0.0254 |
| CAMKK2           | 0.90 | 5.86E-03 | 0.0187 |
| ENST000003006510 | 0.90 | 3.18E-03 | 0.0126 |
| PPP1R15A         | 0.90 | 5.36E-03 | 0.0176 |
| GGA1             | 0.90 | 7.70E-03 | 0.0225 |
| MNAT1            | 0.90 | 9.19E-03 | 0.0253 |
| UQCR11           | 0.90 | 5.38E-03 | 0.0177 |
| LIAS             | 0.90 | 8.79E-03 | 0.0245 |
| TRAPPC5          | 0.90 | 1.46E-02 | 0.0350 |
| POU2F2           | 0.90 | 2.22E-02 | 0.0473 |
| EMC8             | 0.90 | 7.72E-03 | 0.0225 |
| ATPAF1           | 0.90 | 9.46E-03 | 0.0258 |
| C8orf82          | 0.90 | 1.67E-02 | 0.0387 |
| PRKAR1A          | 0.90 | 3.83E-03 | 0.0142 |
| ENST000003233450 | 0.90 | 6.22E-03 | 0.0194 |
| TAF4B            | 0.90 | 6.40E-03 | 0.0198 |
| MAZ              | 0.90 | 7.17E-03 | 0.0214 |
| GCDH             | 0.90 | 2.14E-02 | 0.0460 |
| SLC2A13          | 0.90 | 1.18E-02 | 0.0301 |
| DNAJC2           | 0.90 | 1.85E-02 | 0.0416 |
| PAFAH1B2         | 0.90 | 3.42E-03 | 0.0132 |
| TRAPPC3          | 0.90 | 6.17E-03 | 0.0194 |
| DNAJA2           | 0.90 | 1.49E-02 | 0.0355 |
| RBL1             | 0.90 | 2.57E-03 | 0.0111 |
| YTHDF2           | 0.90 | 2.49E-03 | 0.0109 |
| NMRAL1           | 0.90 | 1.20E-02 | 0.0304 |
| MPHOSPH10        | 0.90 | 9.25E-03 | 0.0254 |
| ENST000003205850 | 0.89 | 1.27E-02 | 0.0318 |
| AC124944.3       | 0.89 | 1.49E-02 | 0.0355 |
| ZNF175           | 0.89 | 9.04E-03 | 0.0250 |
| CHML             | 0.89 | 1.28E-02 | 0.0319 |
| NUP50            | 0.89 | 3.78E-03 | 0.0141 |

|                  |      |          |        |
|------------------|------|----------|--------|
| ANXA7            | 0.89 | 1.01E-02 | 0.0270 |
| RNF14            | 0.89 | 5.28E-03 | 0.0174 |
| MYL12B           | 0.89 | 6.59E-03 | 0.0202 |
| NSL1             | 0.89 | 6.29E-03 | 0.0196 |
| FAM220A          | 0.89 | 1.12E-02 | 0.0290 |
| RHEB             | 0.89 | 1.08E-02 | 0.0282 |
| ZNF85            | 0.89 | 1.03E-02 | 0.0273 |
| MAPRE1           | 0.89 | 5.18E-03 | 0.0173 |
| MAPK3            | 0.89 | 8.95E-03 | 0.0249 |
| RINT1            | 0.89 | 5.51E-03 | 0.0180 |
| BCL2L13          | 0.89 | 3.03E-03 | 0.0122 |
| C8orf59          | 0.89 | 4.06E-03 | 0.0147 |
| DDX31            | 0.89 | 6.44E-03 | 0.0199 |
| PMS1             | 0.89 | 1.33E-02 | 0.0327 |
| ENST000002640801 | 0.89 | 1.12E-02 | 0.0291 |
| ENST000002222542 | 0.89 | 1.45E-02 | 0.0349 |
| RFXANK           | 0.89 | 7.88E-03 | 0.0228 |
| MAP2K2           | 0.89 | 5.41E-03 | 0.0178 |
| TMEM68           | 0.89 | 1.22E-02 | 0.0309 |
| HADHA            | 0.89 | 3.87E-03 | 0.0143 |
| DDX39B           | 0.89 | 3.43E-03 | 0.0132 |
| LARP7            | 0.89 | 3.88E-03 | 0.0143 |
| ORC5             | 0.89 | 1.12E-02 | 0.0290 |
| UTP3             | 0.89 | 4.92E-03 | 0.0167 |
| FCF1             | 0.89 | 3.70E-03 | 0.0139 |
| ST7              | 0.88 | 1.91E-02 | 0.0425 |
| UBA5             | 0.88 | 3.02E-03 | 0.0122 |
| RPA1             | 0.88 | 7.12E-03 | 0.0213 |
| TMEM267          | 0.88 | 4.16E-03 | 0.0150 |
| TSG101           | 0.88 | 3.76E-03 | 0.0140 |
| AP4E1            | 0.88 | 8.98E-03 | 0.0249 |
| USP22            | 0.88 | 4.96E-03 | 0.0167 |
| NDUFV1           | 0.88 | 3.84E-03 | 0.0142 |
| MRPS22           | 0.88 | 4.35E-03 | 0.0154 |
| ENST000002490710 | 0.88 | 5.28E-03 | 0.0174 |
| HNRNPR           | 0.88 | 4.94E-03 | 0.0167 |
| CPSF1            | 0.88 | 1.60E-02 | 0.0374 |
| CARHSP1          | 0.88 | 5.91E-03 | 0.0188 |
| WDR61            | 0.88 | 1.39E-02 | 0.0339 |
| ALPK1            | 0.88 | 2.23E-02 | 0.0475 |
| GJC1             | 0.88 | 1.35E-02 | 0.0331 |
| PUDP             | 0.88 | 2.05E-02 | 0.0446 |
| SENP1            | 0.88 | 4.60E-03 | 0.0160 |
| ZNF664           | 0.88 | 9.06E-03 | 0.0251 |
| SMAD2            | 0.88 | 3.45E-03 | 0.0132 |
| ENST000002659860 | 0.88 | 2.28E-02 | 0.0482 |
| MT-CO2           | 0.88 | 4.17E-03 | 0.0150 |

|                  |      |          |        |
|------------------|------|----------|--------|
| ZC3H10           | 0.88 | 1.74E-02 | 0.0397 |
| ELOA             | 0.88 | 6.80E-03 | 0.0206 |
| UBE2E1           | 0.88 | 4.81E-03 | 0.0164 |
| WNK3             | 0.88 | 2.16E-02 | 0.0464 |
| PPP1R3B          | 0.87 | 6.60E-03 | 0.0202 |
| ZCCHC17          | 0.87 | 7.90E-03 | 0.0229 |
| MT-ATP8          | 0.87 | 1.31E-02 | 0.0324 |
| ENST000002458382 | 0.87 | 7.29E-03 | 0.0216 |
| RTRAF            | 0.87 | 5.71E-03 | 0.0184 |
| NDUFB4           | 0.87 | 3.24E-03 | 0.0127 |
| CAPNS1           | 0.87 | 2.25E-02 | 0.0478 |
| AP3M1            | 0.87 | 8.31E-03 | 0.0236 |
| RBM26-AS1        | 0.87 | 1.03E-02 | 0.0272 |
| ERLIN2           | 0.87 | 4.69E-03 | 0.0162 |
| GPKOW            | 0.87 | 6.70E-03 | 0.0205 |
| FPGT             | 0.87 | 9.25E-03 | 0.0254 |
| SLC30A9          | 0.87 | 9.81E-03 | 0.0264 |
| HNRNPM           | 0.87 | 1.24E-02 | 0.0312 |
| NUS1             | 0.87 | 3.82E-03 | 0.0142 |
| PBDC1            | 0.87 | 8.03E-03 | 0.0231 |
| VAMP8            | 0.87 | 2.01E-02 | 0.0441 |
| CAAP1            | 0.87 | 1.16E-02 | 0.0297 |
| PDE6D            | 0.87 | 9.50E-03 | 0.0259 |
| ZNF714           | 0.87 | 1.44E-02 | 0.0347 |
| CTSH             | 0.87 | 9.94E-03 | 0.0266 |
| TMA7             | 0.87 | 1.50E-02 | 0.0357 |
| VPS37A           | 0.87 | 4.07E-03 | 0.0148 |
| C1orf159         | 0.87 | 2.03E-02 | 0.0444 |
| MPV17            | 0.87 | 5.85E-03 | 0.0187 |
| BNIP3L           | 0.87 | 2.97E-03 | 0.0121 |
| SLC25A20         | 0.87 | 1.44E-02 | 0.0347 |
| UBE2V1           | 0.87 | 3.60E-03 | 0.0136 |
| SPG21            | 0.87 | 7.79E-03 | 0.0227 |
| ZNF280C          | 0.87 | 1.23E-02 | 0.0311 |
| SMARCA4          | 0.86 | 4.38E-03 | 0.0155 |
| CREM             | 0.86 | 1.89E-02 | 0.0422 |
| EMG1             | 0.86 | 9.29E-03 | 0.0255 |
| ENST000003219193 | 0.86 | 1.43E-02 | 0.0345 |
| NAA25            | 0.86 | 3.77E-03 | 0.0140 |
| PYCR2            | 0.86 | 1.17E-02 | 0.0300 |
| ENST000002650692 | 0.86 | 3.60E-03 | 0.0136 |
| EIF3J            | 0.86 | 1.62E-02 | 0.0377 |
| MSANTD4          | 0.86 | 5.31E-03 | 0.0175 |
| KAT5             | 0.86 | 5.99E-03 | 0.0190 |
| CUL1             | 0.86 | 5.02E-03 | 0.0169 |
| ATG3             | 0.86 | 5.94E-03 | 0.0189 |
| ALG10            | 0.86 | 6.03E-03 | 0.0191 |

|                  |      |          |        |
|------------------|------|----------|--------|
| ATXN2L           | 0.86 | 1.95E-02 | 0.0431 |
| OPA1             | 0.86 | 2.75E-03 | 0.0116 |
| PARN             | 0.86 | 4.88E-03 | 0.0166 |
| ZNF543           | 0.86 | 7.91E-03 | 0.0229 |
| WDR1             | 0.86 | 5.25E-03 | 0.0174 |
| RUNX3            | 0.86 | 2.11E-02 | 0.0456 |
| WDFY1            | 0.86 | 2.99E-03 | 0.0121 |
| LRRC45           | 0.86 | 2.39E-02 | 0.0499 |
| AARSD1           | 0.86 | 8.78E-03 | 0.0245 |
| AKT1S1           | 0.85 | 1.78E-02 | 0.0404 |
| ABCF2            | 0.85 | 5.35E-03 | 0.0176 |
| RPS6KA1          | 0.85 | 5.09E-03 | 0.0170 |
| WDR90            | 0.85 | 1.32E-02 | 0.0326 |
| MT-CO1           | 0.85 | 1.62E-03 | 0.0085 |
| DUSP12           | 0.85 | 1.37E-02 | 0.0336 |
| SRBD1            | 0.85 | 3.91E-03 | 0.0144 |
| NQO2             | 0.85 | 7.02E-03 | 0.0211 |
| CYREN            | 0.85 | 1.40E-02 | 0.0341 |
| RBM17            | 0.85 | 1.06E-02 | 0.0279 |
| ENST000003044141 | 0.85 | 5.91E-03 | 0.0188 |
| COX15            | 0.85 | 7.47E-03 | 0.0220 |
| MUT              | 0.85 | 1.31E-02 | 0.0324 |
| UQCC3            | 0.85 | 1.94E-02 | 0.0429 |
| ENST00000536999  | 0.85 | 2.27E-02 | 0.0480 |
| LARS2            | 0.85 | 1.52E-02 | 0.0361 |
| C19orf47         | 0.85 | 2.17E-02 | 0.0464 |
| ENST000003031420 | 0.85 | 1.59E-02 | 0.0372 |
| UBE2N            | 0.85 | 1.25E-02 | 0.0314 |
| ATAD3B           | 0.85 | 1.48E-02 | 0.0355 |
| PDCD6            | 0.85 | 7.53E-03 | 0.0222 |
| ATP5MG           | 0.84 | 1.55E-02 | 0.0366 |
| KLHDC3           | 0.84 | 1.27E-02 | 0.0318 |
| SIRT3            | 0.84 | 9.84E-03 | 0.0265 |
| DNAJA4           | 0.84 | 6.07E-03 | 0.0192 |
| TRIM26           | 0.84 | 9.71E-03 | 0.0262 |
| DHRS4-AS1        | 0.84 | 1.48E-02 | 0.0353 |
| LIN52            | 0.84 | 1.58E-02 | 0.0371 |
| CWC27            | 0.84 | 4.31E-03 | 0.0153 |
| CLPTM1L          | 0.84 | 1.70E-02 | 0.0391 |
| BTBD19           | 0.84 | 1.62E-02 | 0.0377 |
| METTL2B          | 0.84 | 1.09E-02 | 0.0285 |
| ASAH2            | 0.84 | 1.72E-02 | 0.0394 |
| CCNC             | 0.84 | 4.67E-03 | 0.0161 |
| ENST000002369800 | 0.84 | 5.12E-03 | 0.0171 |
| ZKSCAN5          | 0.84 | 6.10E-03 | 0.0192 |
| HMG1             | 0.84 | 6.79E-03 | 0.0206 |
| STX12            | 0.84 | 4.94E-03 | 0.0167 |

|                  |      |          |        |
|------------------|------|----------|--------|
| AC020915.5       | 0.84 | 1.76E-02 | 0.0401 |
| IFT74            | 0.84 | 2.11E-02 | 0.0455 |
| TMBIM6           | 0.84 | 2.65E-03 | 0.0113 |
| ALKBH8           | 0.84 | 1.41E-02 | 0.0343 |
| AGPS             | 0.84 | 5.86E-03 | 0.0187 |
| MED28            | 0.84 | 1.45E-02 | 0.0349 |
| RPS6KB2          | 0.84 | 8.16E-03 | 0.0234 |
| PSD4             | 0.84 | 1.14E-02 | 0.0295 |
| ELL              | 0.84 | 1.28E-02 | 0.0319 |
| ENST000002341150 | 0.84 | 6.51E-03 | 0.0200 |
| AC024940.5       | 0.84 | 2.03E-02 | 0.0444 |
| SBF2-AS1         | 0.84 | 6.32E-03 | 0.0196 |
| PRR3             | 0.84 | 7.90E-03 | 0.0229 |
| C1GALT1C1        | 0.84 | 1.60E-02 | 0.0374 |
| ENST000002939810 | 0.84 | 2.35E-02 | 0.0492 |
| TP53             | 0.83 | 1.82E-02 | 0.0411 |
| ENST000002864481 | 0.83 | 4.76E-03 | 0.0163 |
| PAM              | 0.83 | 6.22E-03 | 0.0194 |
| PHAX             | 0.83 | 8.92E-03 | 0.0248 |
| AC006504.5       | 0.83 | 1.62E-02 | 0.0377 |
| HNRNPUL2         | 0.83 | 8.02E-03 | 0.0231 |
| EMC4             | 0.83 | 7.73E-03 | 0.0225 |
| RPL7A            | 0.83 | 7.13E-03 | 0.0213 |
| ENST000002950872 | 0.83 | 1.01E-02 | 0.0270 |
| EIF4ENIF1        | 0.83 | 1.25E-02 | 0.0314 |
| EIF3M            | 0.83 | 4.13E-03 | 0.0149 |
| ANKRD40          | 0.83 | 8.76E-03 | 0.0245 |
| NDE1             | 0.83 | 4.93E-03 | 0.0167 |
| PEBP1            | 0.83 | 1.14E-02 | 0.0293 |
| EHBP1L1          | 0.83 | 5.21E-03 | 0.0173 |
| MKKS             | 0.83 | 1.11E-02 | 0.0289 |
| PATL1            | 0.83 | 1.40E-02 | 0.0339 |
| TFG              | 0.83 | 8.11E-03 | 0.0233 |
| ATN1             | 0.83 | 2.39E-02 | 0.0499 |
| ENST000003339900 | 0.83 | 1.23E-02 | 0.0311 |
| TAF1B            | 0.83 | 4.88E-03 | 0.0166 |
| AP5B1            | 0.83 | 2.16E-02 | 0.0464 |
| PIN4             | 0.83 | 1.24E-02 | 0.0311 |
| MMAA             | 0.83 | 5.94E-03 | 0.0189 |
| ENST000002771650 | 0.83 | 5.31E-03 | 0.0175 |
| ENST000003409130 | 0.83 | 1.03E-02 | 0.0274 |
| RACK1            | 0.83 | 2.56E-03 | 0.0111 |
| RCL1             | 0.83 | 1.30E-02 | 0.0323 |
| HDAC11           | 0.82 | 2.26E-02 | 0.0478 |
| TRNAU1AP         | 0.82 | 8.49E-03 | 0.0240 |
| ZFYVE19          | 0.82 | 9.01E-03 | 0.0250 |
| GIT1             | 0.82 | 1.85E-02 | 0.0416 |

|                  |      |          |        |
|------------------|------|----------|--------|
| ATG4B            | 0.82 | 6.08E-03 | 0.0192 |
| STK38L           | 0.82 | 1.90E-02 | 0.0423 |
| GUK1             | 0.82 | 8.11E-03 | 0.0233 |
| RIOX2            | 0.82 | 8.55E-03 | 0.0241 |
| C1orf122         | 0.82 | 2.02E-02 | 0.0443 |
| TBK1             | 0.82 | 1.51E-02 | 0.0358 |
| CNOT1            | 0.82 | 3.31E-03 | 0.0129 |
| ABCG1            | 0.82 | 8.15E-03 | 0.0233 |
| HNRNPA1          | 0.82 | 7.71E-03 | 0.0225 |
| SLC46A1          | 0.82 | 1.93E-02 | 0.0428 |
| AARS2            | 0.82 | 6.77E-03 | 0.0206 |
| CCZ1             | 0.82 | 3.76E-03 | 0.0140 |
| FPGS             | 0.82 | 8.53E-03 | 0.0241 |
| DNAJC11          | 0.82 | 7.65E-03 | 0.0224 |
| SNAP47           | 0.82 | 8.75E-03 | 0.0245 |
| NCLN             | 0.81 | 1.83E-02 | 0.0412 |
| SH3BP5L          | 0.81 | 2.14E-02 | 0.0460 |
| ZNF106           | 0.81 | 3.25E-03 | 0.0128 |
| ENST000003129161 | 0.81 | 6.13E-03 | 0.0193 |
| GATB             | 0.81 | 1.25E-02 | 0.0314 |
| EIF2A            | 0.81 | 4.28E-03 | 0.0153 |
| UPF1             | 0.81 | 5.18E-03 | 0.0173 |
| IDI1             | 0.81 | 1.63E-02 | 0.0378 |
| QRSL1            | 0.81 | 1.24E-02 | 0.0311 |
| RABGEF1          | 0.81 | 6.52E-03 | 0.0201 |
| DTD2             | 0.81 | 1.52E-02 | 0.0360 |
| TPRA1            | 0.81 | 1.59E-02 | 0.0373 |
| G3BP1            | 0.81 | 1.82E-02 | 0.0410 |
| ARL6IP6          | 0.81 | 1.35E-02 | 0.0331 |
| PABPN1           | 0.81 | 1.99E-02 | 0.0438 |
| HEXIM1           | 0.81 | 1.66E-02 | 0.0384 |
| ARSB             | 0.81 | 9.10E-03 | 0.0252 |
| ATL2             | 0.81 | 7.57E-03 | 0.0222 |
| NELFCD           | 0.81 | 1.39E-02 | 0.0338 |
| DBR1             | 0.81 | 7.33E-03 | 0.0217 |
| SASH3            | 0.81 | 6.64E-03 | 0.0203 |
| PHRF1            | 0.81 | 6.48E-03 | 0.0200 |
| ZNF384           | 0.81 | 1.68E-02 | 0.0387 |
| DYNC1I2          | 0.81 | 6.48E-03 | 0.0200 |
| SLC30A6          | 0.81 | 6.10E-03 | 0.0192 |
| DNAJC17          | 0.81 | 1.86E-02 | 0.0418 |
| PDIA3            | 0.81 | 3.97E-03 | 0.0145 |
| DGUOK            | 0.81 | 2.12E-02 | 0.0457 |
| SMARCAD1         | 0.80 | 7.75E-03 | 0.0226 |
| ZNF646           | 0.80 | 1.34E-02 | 0.0330 |
| ENST000002635590 | 0.80 | 8.01E-03 | 0.0231 |
| SH3BGRL3         | 0.80 | 2.06E-02 | 0.0449 |

|                  |      |          |        |
|------------------|------|----------|--------|
| PRPF40A          | 0.80 | 6.74E-03 | 0.0205 |
| PANK4            | 0.80 | 8.31E-03 | 0.0236 |
| CHRAC1           | 0.80 | 1.07E-02 | 0.0281 |
| ZCCHC9           | 0.80 | 1.21E-02 | 0.0307 |
| RNF34            | 0.80 | 4.39E-03 | 0.0155 |
| SNHG26           | 0.80 | 1.38E-02 | 0.0336 |
| TRIM38           | 0.80 | 9.22E-03 | 0.0254 |
| MIPEP            | 0.80 | 1.23E-02 | 0.0310 |
| DYNLRB1          | 0.80 | 1.33E-02 | 0.0327 |
| CDC26            | 0.80 | 7.58E-03 | 0.0222 |
| ATP5PD           | 0.80 | 5.25E-03 | 0.0174 |
| STRAP            | 0.80 | 1.31E-02 | 0.0324 |
| COPS6            | 0.80 | 1.35E-02 | 0.0332 |
| TNFRSF1A         | 0.80 | 2.22E-02 | 0.0473 |
| ENST000002375300 | 0.80 | 5.59E-03 | 0.0181 |
| ZCCHC10          | 0.80 | 7.81E-03 | 0.0227 |
| DDX10            | 0.80 | 1.23E-02 | 0.0310 |
| GNPDA2           | 0.80 | 1.55E-02 | 0.0366 |
| MAN1A1           | 0.80 | 2.28E-02 | 0.0482 |
| TRIM5            | 0.80 | 2.13E-02 | 0.0460 |
| QARS             | 0.79 | 6.50E-03 | 0.0200 |
| IFT52            | 0.79 | 1.27E-02 | 0.0317 |
| XPO5             | 0.79 | 1.47E-02 | 0.0352 |
| DNAJB11          | 0.79 | 8.51E-03 | 0.0240 |
| ENST000003062701 | 0.79 | 9.96E-03 | 0.0267 |
| KCMF1            | 0.79 | 7.31E-03 | 0.0217 |
| CDKN2D           | 0.79 | 1.94E-02 | 0.0429 |
| MMS19            | 0.79 | 1.58E-02 | 0.0370 |
| ENST000002902460 | 0.79 | 6.88E-03 | 0.0208 |
| AMPD2            | 0.79 | 1.15E-02 | 0.0295 |
| HIRA             | 0.79 | 6.31E-03 | 0.0196 |
| CYB5D2           | 0.79 | 1.38E-02 | 0.0337 |
| STK16            | 0.79 | 7.18E-03 | 0.0214 |
| MRPL9            | 0.79 | 5.56E-03 | 0.0181 |
| CNPY2            | 0.79 | 1.75E-02 | 0.0399 |
| METTL15          | 0.79 | 1.27E-02 | 0.0318 |
| PDCL             | 0.79 | 7.23E-03 | 0.0215 |
| AIP              | 0.79 | 9.15E-03 | 0.0253 |
| CMTR2            | 0.79 | 7.07E-03 | 0.0212 |
| ARL6IP4          | 0.79 | 1.62E-02 | 0.0378 |
| UBL7-AS1         | 0.79 | 2.26E-02 | 0.0479 |
| BTF3L4           | 0.79 | 1.74E-02 | 0.0398 |
| ZNF692           | 0.79 | 9.90E-03 | 0.0266 |
| CNOT11           | 0.79 | 6.07E-03 | 0.0192 |
| ENST000003229400 | 0.79 | 1.38E-02 | 0.0336 |
| OSBP             | 0.79 | 6.26E-03 | 0.0195 |
| TGS1             | 0.79 | 6.84E-03 | 0.0207 |



|         |      |          |        |
|---------|------|----------|--------|
| IQCE    | 0.79 | 1.63E-02 | 0.0379 |
| GM2A    | 0.79 | 8.60E-03 | 0.0242 |
| KDM1A   | 0.79 | 5.39E-03 | 0.0177 |
| NPTN    | 0.79 | 8.60E-03 | 0.0242 |
| MCCC2   | 0.79 | 7.03E-03 | 0.0211 |
| PMS2P1  | 0.79 | 1.90E-02 | 0.0423 |
| CCDC171 | 0.79 | 8.90E-03 | 0.0248 |
| NFU1    | 0.79 | 9.02E-03 | 0.0250 |
| RNF40   | 0.79 | 5.75E-03 | 0.0185 |
| CHMP1A  | 0.78 | 1.59E-02 | 0.0373 |
| TMEM9   | 0.78 | 1.31E-02 | 0.0324 |
| DNAJC1  | 0.78 | 1.07E-02 | 0.0280 |
| RNPS1   | 0.78 | 5.37E-03 | 0.0176 |
| RAB1A   | 0.78 | 5.25E-03 | 0.0174 |
| PAIP1   | 0.78 | 8.22E-03 | 0.0234 |
| JAK2    | 0.78 | 1.50E-02 | 0.0357 |
| MED11   | 0.78 | 2.35E-02 | 0.0493 |
| TDP2    | 0.78 | 5.83E-03 | 0.0187 |
| RNF213  | 0.78 | 1.91E-02 | 0.0425 |
| RAB5A   | 0.78 | 1.18E-02 | 0.0302 |
| GRB2    | 0.78 | 4.78E-03 | 0.0164 |
| PABPC1L | 0.78 | 1.77E-02 | 0.0402 |
| KRT10   | 0.78 | 1.52E-02 | 0.0360 |
| VAT1    | 0.78 | 2.19E-02 | 0.0468 |
| FAM184A | 0.78 | 1.34E-02 | 0.0330 |
| MITD1   | 0.78 | 6.00E-03 | 0.0190 |
| ZNF121  | 0.78 | 9.12E-03 | 0.0252 |
| EWSR1   | 0.78 | 5.72E-03 | 0.0184 |
| CDC5L   | 0.78 | 5.76E-03 | 0.0185 |
| PITPNM1 | 0.78 | 1.21E-02 | 0.0307 |
| BLOC1S5 | 0.78 | 1.01E-02 | 0.0270 |
| TCERG1  | 0.78 | 7.84E-03 | 0.0228 |
| PISD    | 0.78 | 1.37E-02 | 0.0335 |
| MTREX   | 0.77 | 7.39E-03 | 0.0218 |
| ADIPOR2 | 0.77 | 2.10E-02 | 0.0455 |
| CDK16   | 0.77 | 1.66E-02 | 0.0385 |
| RPL6P27 | 0.77 | 2.27E-02 | 0.0480 |
| ARL5A   | 0.77 | 1.56E-02 | 0.0368 |
| HACD2   | 0.77 | 8.17E-03 | 0.0234 |
| WDR45B  | 0.77 | 6.76E-03 | 0.0206 |
| TEX261  | 0.77 | 1.52E-02 | 0.0361 |
| BRPF1   | 0.77 | 9.59E-03 | 0.0260 |
| TXNRD2  | 0.77 | 1.32E-02 | 0.0325 |
| ZNF684  | 0.77 | 2.22E-02 | 0.0473 |
| STK24   | 0.77 | 5.29E-03 | 0.0175 |
| SNHG16  | 0.77 | 8.63E-03 | 0.0242 |
| PCNT    | 0.77 | 9.57E-03 | 0.0260 |

|                  |      |          |        |
|------------------|------|----------|--------|
| ZMAT5            | 0.77 | 1.58E-02 | 0.0371 |
| TNFAIP8L1        | 0.77 | 2.10E-02 | 0.0455 |
| EXOSC10          | 0.77 | 7.63E-03 | 0.0223 |
| NUP88            | 0.77 | 8.87E-03 | 0.0247 |
| ZNF622           | 0.77 | 8.26E-03 | 0.0235 |
| MAP9             | 0.77 | 1.58E-02 | 0.0371 |
| KIAA2013         | 0.76 | 1.05E-02 | 0.0277 |
| SLC25A40         | 0.76 | 7.08E-03 | 0.0212 |
| DNM1L            | 0.76 | 1.08E-02 | 0.0283 |
| HTATSF1          | 0.76 | 1.46E-02 | 0.0350 |
| RASSF5           | 0.76 | 5.11E-03 | 0.0171 |
| THOC5            | 0.76 | 7.72E-03 | 0.0225 |
| ADAT2            | 0.76 | 7.62E-03 | 0.0223 |
| SRSF9            | 0.76 | 8.50E-03 | 0.0240 |
| PDIK1L           | 0.76 | 7.88E-03 | 0.0228 |
| ENST000002941890 | 0.76 | 9.43E-03 | 0.0257 |
| UQCC1            | 0.76 | 9.85E-03 | 0.0265 |
| ITGAV            | 0.76 | 1.19E-02 | 0.0303 |
| SEC24C           | 0.76 | 2.15E-02 | 0.0462 |
| AFDN             | 0.76 | 9.73E-03 | 0.0263 |
| SMARCAL1         | 0.76 | 1.06E-02 | 0.0278 |
| KRTCAP2          | 0.76 | 1.09E-02 | 0.0285 |
| ENST000003552380 | 0.76 | 6.18E-03 | 0.0194 |
| GTF2H5           | 0.76 | 1.67E-02 | 0.0386 |
| SRGAP2           | 0.76 | 1.62E-02 | 0.0377 |
| RAP1A            | 0.76 | 5.75E-03 | 0.0185 |
| TRIM59           | 0.75 | 9.85E-03 | 0.0265 |
| TAF2             | 0.75 | 5.93E-03 | 0.0189 |
| ARMCX6           | 0.75 | 9.21E-03 | 0.0254 |
| CUL4A            | 0.75 | 7.85E-03 | 0.0228 |
| MUTYH            | 0.75 | 1.90E-02 | 0.0423 |
| ANXA4            | 0.75 | 1.04E-02 | 0.0275 |
| DNAJC21          | 0.75 | 1.40E-02 | 0.0340 |
| ENST000002750361 | 0.75 | 1.94E-02 | 0.0429 |
| CNOT10           | 0.75 | 9.70E-03 | 0.0262 |
| RALBP1           | 0.75 | 8.09E-03 | 0.0232 |
| LINC00963        | 0.75 | 1.78E-02 | 0.0405 |
| GTF3A            | 0.75 | 1.99E-02 | 0.0437 |
| ZFP91-CNTF       | 0.75 | 2.00E-02 | 0.0438 |
| CERS4            | 0.75 | 1.93E-02 | 0.0428 |
| ARFIP2           | 0.75 | 1.02E-02 | 0.0272 |
| TMEM41B          | 0.75 | 1.54E-02 | 0.0364 |
| RTF2             | 0.75 | 8.38E-03 | 0.0238 |
| DENND3           | 0.75 | 2.36E-02 | 0.0495 |
| TEX10            | 0.75 | 2.16E-02 | 0.0464 |
| UBXN8            | 0.75 | 2.36E-02 | 0.0495 |
| RPL35            | 0.75 | 5.84E-03 | 0.0187 |

|                  |      |          |        |
|------------------|------|----------|--------|
| SLC25A3          | 0.75 | 1.01E-02 | 0.0269 |
| ANKRD39          | 0.75 | 2.34E-02 | 0.0491 |
| RER1             | 0.75 | 1.45E-02 | 0.0350 |
| GNL1             | 0.75 | 1.61E-02 | 0.0376 |
| NUBP1            | 0.75 | 1.60E-02 | 0.0375 |
| HINT1            | 0.75 | 6.43E-03 | 0.0199 |
| CCND3            | 0.74 | 5.55E-03 | 0.0181 |
| KXD1             | 0.74 | 1.06E-02 | 0.0280 |
| MRPL48           | 0.74 | 1.73E-02 | 0.0395 |
| COMMD1           | 0.74 | 1.87E-02 | 0.0418 |
| PUS10            | 0.74 | 1.49E-02 | 0.0355 |
| ENST000002789030 | 0.74 | 2.29E-02 | 0.0483 |
| MRPS21           | 0.74 | 8.23E-03 | 0.0235 |
| ENST000003258052 | 0.74 | 1.11E-02 | 0.0288 |
| PARP14           | 0.74 | 1.40E-02 | 0.0340 |
| TRIM41           | 0.74 | 1.12E-02 | 0.0291 |
| CDK5RAP2         | 0.74 | 5.69E-03 | 0.0184 |
| RALY             | 0.74 | 1.32E-02 | 0.0325 |
| ASXL1            | 0.74 | 7.85E-03 | 0.0228 |
| METTL9           | 0.74 | 7.75E-03 | 0.0226 |
| APMAP            | 0.74 | 8.55E-03 | 0.0241 |
| PPTC7            | 0.74 | 1.87E-02 | 0.0418 |
| TRMT1L           | 0.74 | 9.15E-03 | 0.0252 |
| MEAF6            | 0.74 | 1.44E-02 | 0.0348 |
| FOXK2            | 0.74 | 1.23E-02 | 0.0311 |
| C6orf203         | 0.74 | 1.49E-02 | 0.0355 |
| SNRNP70          | 0.74 | 1.31E-02 | 0.0324 |
| ERCC8            | 0.74 | 1.75E-02 | 0.0399 |
| RRAGA            | 0.73 | 2.13E-02 | 0.0460 |
| MZT2A            | 0.73 | 1.28E-02 | 0.0319 |
| GUSB             | 0.73 | 1.21E-02 | 0.0306 |
| AGO1             | 0.73 | 1.23E-02 | 0.0310 |
| PSMD6            | 0.73 | 1.94E-02 | 0.0429 |
| NPC2             | 0.73 | 1.52E-02 | 0.0360 |
| ADIPOR1          | 0.73 | 1.33E-02 | 0.0329 |
| RFESD            | 0.73 | 1.98E-02 | 0.0435 |
| ENST000003414841 | 0.73 | 1.03E-02 | 0.0272 |
| TNPO1            | 0.73 | 2.14E-02 | 0.0460 |
| UBE2D2           | 0.73 | 8.19E-03 | 0.0234 |
| EAF1             | 0.73 | 1.12E-02 | 0.0290 |
| CSNK1A1          | 0.73 | 7.32E-03 | 0.0217 |
| MAP4             | 0.73 | 1.64E-02 | 0.0381 |
| NOP9             | 0.73 | 1.47E-02 | 0.0352 |
| SMARCA5          | 0.73 | 1.16E-02 | 0.0298 |
| LONRF1           | 0.73 | 1.85E-02 | 0.0416 |
| ING1             | 0.73 | 1.47E-02 | 0.0352 |
| RAD21            | 0.73 | 7.05E-03 | 0.0212 |

|                  |      |          |        |
|------------------|------|----------|--------|
| ZNF286A          | 0.73 | 9.74E-03 | 0.0263 |
| COX7C            | 0.73 | 6.34E-03 | 0.0197 |
| EIF3L            | 0.73 | 5.06E-03 | 0.0170 |
| ENST000002406513 | 0.73 | 7.67E-03 | 0.0224 |
| DHX15            | 0.72 | 8.13E-03 | 0.0233 |
| INTS1            | 0.72 | 1.34E-02 | 0.0330 |
| RNF41            | 0.72 | 1.32E-02 | 0.0326 |
| DAP3             | 0.72 | 1.01E-02 | 0.0270 |
| AP2B1            | 0.72 | 5.77E-03 | 0.0186 |
| NKIRAS1          | 0.72 | 1.91E-02 | 0.0425 |
| SSB              | 0.72 | 1.34E-02 | 0.0330 |
| ETFDH            | 0.72 | 1.16E-02 | 0.0297 |
| BUB3             | 0.72 | 6.19E-03 | 0.0194 |
| FAM114A2         | 0.72 | 1.31E-02 | 0.0324 |
| ATP6V1B2         | 0.72 | 8.59E-03 | 0.0242 |
| HENMT1           | 0.72 | 2.16E-02 | 0.0463 |
| MED27            | 0.72 | 1.84E-02 | 0.0414 |
| PSMC6            | 0.72 | 1.27E-02 | 0.0318 |
| PDCD2            | 0.72 | 1.73E-02 | 0.0396 |
| OSTF1            | 0.72 | 8.04E-03 | 0.0231 |
| RSPRY1           | 0.72 | 9.83E-03 | 0.0265 |
| SPCS2            | 0.72 | 8.62E-03 | 0.0242 |
| TCAIM            | 0.71 | 1.93E-02 | 0.0428 |
| NAA35            | 0.71 | 1.00E-02 | 0.0268 |
| MICB             | 0.71 | 1.37E-02 | 0.0335 |
| FUBP3            | 0.71 | 1.73E-02 | 0.0396 |
| RPL37A           | 0.71 | 4.38E-03 | 0.0155 |
| GID8             | 0.71 | 9.29E-03 | 0.0255 |
| FASTKD2          | 0.71 | 1.39E-02 | 0.0338 |
| STAT6            | 0.71 | 1.37E-02 | 0.0336 |
| ENST000003346900 | 0.71 | 1.51E-02 | 0.0358 |
| PPP2R3C          | 0.71 | 8.04E-03 | 0.0231 |
| PLEKHM2          | 0.71 | 1.22E-02 | 0.0309 |
| SDF2             | 0.71 | 1.82E-02 | 0.0410 |
| PRR5L            | 0.71 | 2.37E-02 | 0.0497 |
| FKBP3            | 0.71 | 9.25E-03 | 0.0254 |
| HIST4H4          | 0.71 | 8.05E-03 | 0.0231 |
| SEH1L            | 0.71 | 1.79E-02 | 0.0405 |
| CAMLG            | 0.71 | 1.49E-02 | 0.0355 |
| RPL4             | 0.71 | 4.02E-03 | 0.0146 |
| RNH1             | 0.71 | 1.40E-02 | 0.0341 |
| PDCD7            | 0.71 | 9.44E-03 | 0.0258 |
| NOP58            | 0.71 | 1.31E-02 | 0.0324 |
| UBE2Q1           | 0.71 | 9.98E-03 | 0.0267 |
| MTFMT            | 0.71 | 1.87E-02 | 0.0418 |
| TPD52            | 0.71 | 1.23E-02 | 0.0310 |
| MRS2             | 0.71 | 1.16E-02 | 0.0298 |

|                  |      |          |        |
|------------------|------|----------|--------|
| ENST000002653930 | 0.70 | 6.51E-03 | 0.0200 |
| ADAL             | 0.70 | 1.70E-02 | 0.0390 |
| OTUB1            | 0.70 | 1.65E-02 | 0.0382 |
| TXLNG            | 0.70 | 9.93E-03 | 0.0266 |
| FMNL1            | 0.70 | 2.36E-02 | 0.0494 |
| PCNP             | 0.70 | 7.34E-03 | 0.0217 |
| BFAR             | 0.70 | 1.37E-02 | 0.0336 |
| DVL1             | 0.70 | 2.31E-02 | 0.0486 |
| ZBED1            | 0.70 | 1.28E-02 | 0.0319 |
| RNF6             | 0.70 | 1.33E-02 | 0.0327 |
| ECI2             | 0.70 | 1.03E-02 | 0.0273 |
| SURF6            | 0.70 | 9.69E-03 | 0.0262 |
| ENDOD1           | 0.70 | 1.05E-02 | 0.0276 |
| ZC3H8            | 0.70 | 1.53E-02 | 0.0363 |
| SPTLC2           | 0.70 | 9.01E-03 | 0.0250 |
| PRDM10           | 0.70 | 1.92E-02 | 0.0427 |
| ADH5             | 0.70 | 9.27E-03 | 0.0254 |
| HIST2H2AC        | 0.70 | 7.67E-03 | 0.0224 |
| RTN3             | 0.70 | 1.75E-02 | 0.0399 |
| PPP2R1B          | 0.70 | 2.32E-02 | 0.0488 |
| ENST000002638570 | 0.70 | 1.73E-02 | 0.0395 |
| KATNA1           | 0.69 | 1.77E-02 | 0.0403 |
| RBM4B            | 0.69 | 1.90E-02 | 0.0423 |
| CDC16            | 0.69 | 1.36E-02 | 0.0334 |
| PTCD2            | 0.69 | 1.48E-02 | 0.0354 |
| MDM2             | 0.69 | 8.87E-03 | 0.0247 |
| ENST000003305011 | 0.69 | 1.21E-02 | 0.0307 |
| ACTR2            | 0.69 | 1.19E-02 | 0.0303 |
| BCL7C            | 0.69 | 1.93E-02 | 0.0428 |
| ACTR6            | 0.69 | 9.97E-03 | 0.0267 |
| MUS81            | 0.69 | 1.62E-02 | 0.0378 |
| BRK1             | 0.69 | 2.11E-02 | 0.0455 |
| URGCP            | 0.69 | 1.48E-02 | 0.0354 |
| BMS1P4           | 0.69 | 1.99E-02 | 0.0437 |
| C12orf4          | 0.69 | 1.57E-02 | 0.0369 |
| GMPR2            | 0.69 | 1.17E-02 | 0.0299 |
| CTR9             | 0.69 | 1.73E-02 | 0.0395 |
| CLP1             | 0.68 | 1.63E-02 | 0.0378 |
| ADSL             | 0.68 | 1.80E-02 | 0.0408 |
| DNAJB2           | 0.68 | 1.09E-02 | 0.0285 |
| EXO5             | 0.68 | 2.01E-02 | 0.0441 |
| ENST000003921290 | 0.68 | 1.27E-02 | 0.0317 |
| CNIH4            | 0.68 | 1.67E-02 | 0.0386 |
| RASSF2           | 0.68 | 1.65E-02 | 0.0383 |
| TRMT44           | 0.68 | 1.83E-02 | 0.0412 |
| MRPL54           | 0.68 | 1.77E-02 | 0.0403 |
| GOLGA3           | 0.68 | 8.25E-03 | 0.0235 |

|                  |      |          |        |
|------------------|------|----------|--------|
| RPL6             | 0.68 | 1.09E-02 | 0.0285 |
| ECD              | 0.68 | 9.73E-03 | 0.0263 |
| POC1B            | 0.68 | 1.35E-02 | 0.0332 |
| DNAJC19          | 0.68 | 1.71E-02 | 0.0392 |
| RAB35            | 0.68 | 2.16E-02 | 0.0464 |
| GLMN             | 0.68 | 1.55E-02 | 0.0366 |
| ENST000003184101 | 0.68 | 2.00E-02 | 0.0439 |
| UBLCP1           | 0.68 | 1.89E-02 | 0.0421 |
| FAM111A          | 0.68 | 1.44E-02 | 0.0347 |
| UBE2D1           | 0.68 | 1.73E-02 | 0.0395 |
| HMGXB4           | 0.68 | 1.30E-02 | 0.0322 |
| SMU1             | 0.67 | 1.80E-02 | 0.0407 |
| ZFP1             | 0.67 | 1.68E-02 | 0.0387 |
| SAFB             | 0.67 | 1.43E-02 | 0.0345 |
| MED22            | 0.67 | 1.65E-02 | 0.0383 |
| HTT              | 0.67 | 1.43E-02 | 0.0345 |
| PRKRA            | 0.67 | 1.07E-02 | 0.0281 |
| AEN              | 0.67 | 1.02E-02 | 0.0271 |
| DPH5             | 0.67 | 1.24E-02 | 0.0312 |
| MAPKAPK2         | 0.67 | 1.14E-02 | 0.0293 |
| LIN54            | 0.67 | 1.14E-02 | 0.0294 |
| NNT              | 0.67 | 8.49E-03 | 0.0240 |
| HPS5             | 0.67 | 1.08E-02 | 0.0283 |
| MRE11            | 0.67 | 1.33E-02 | 0.0327 |
| SELENOS          | 0.67 | 2.30E-02 | 0.0485 |
| ENSA             | 0.67 | 1.21E-02 | 0.0306 |
| TUBGCP3          | 0.67 | 1.35E-02 | 0.0332 |
| EDC4             | 0.67 | 1.66E-02 | 0.0384 |
| GTPBP8           | 0.67 | 1.29E-02 | 0.0321 |
| SSR1             | 0.67 | 9.89E-03 | 0.0266 |
| C2orf69          | 0.67 | 1.70E-02 | 0.0391 |
| ENST000003317381 | 0.67 | 1.26E-02 | 0.0316 |
| MTDH             | 0.67 | 2.03E-02 | 0.0443 |
| LCMT1            | 0.67 | 2.01E-02 | 0.0441 |
| HNRNPA2B1        | 0.66 | 1.38E-02 | 0.0336 |
| CSNK1E           | 0.66 | 1.19E-02 | 0.0302 |
| WDR55            | 0.66 | 1.44E-02 | 0.0347 |
| HDAC1            | 0.66 | 1.84E-02 | 0.0414 |
| PITHD1           | 0.66 | 1.30E-02 | 0.0322 |
| NHLRC2           | 0.66 | 1.32E-02 | 0.0326 |
| MCU              | 0.66 | 1.99E-02 | 0.0437 |
| HADHB            | 0.66 | 1.32E-02 | 0.0326 |
| UNC50            | 0.66 | 1.69E-02 | 0.0388 |
| DCTN5            | 0.66 | 1.44E-02 | 0.0347 |
| PMM2             | 0.66 | 1.14E-02 | 0.0294 |
| CBWD1            | 0.66 | 1.07E-02 | 0.0281 |
| ENST000003217570 | 0.66 | 9.85E-03 | 0.0265 |

|                  |      |          |        |
|------------------|------|----------|--------|
| UCK1             | 0.66 | 2.22E-02 | 0.0473 |
| VAV1             | 0.66 | 1.02E-02 | 0.0272 |
| RABGGTB          | 0.66 | 1.23E-02 | 0.0311 |
| HEATR3           | 0.66 | 1.52E-02 | 0.0361 |
| SDHC             | 0.66 | 1.14E-02 | 0.0295 |
| ENST000002644511 | 0.66 | 1.31E-02 | 0.0325 |
| KPNA6            | 0.66 | 1.22E-02 | 0.0308 |
| NOL6             | 0.66 | 1.94E-02 | 0.0429 |
| TAF8             | 0.66 | 1.49E-02 | 0.0355 |
| SSX2IP           | 0.65 | 2.08E-02 | 0.0452 |
| SRRT             | 0.65 | 2.07E-02 | 0.0450 |
| NGLY1            | 0.65 | 1.08E-02 | 0.0283 |
| VPS16            | 0.65 | 1.17E-02 | 0.0298 |
| DHX38            | 0.65 | 1.68E-02 | 0.0388 |
| KLHDC4           | 0.65 | 1.37E-02 | 0.0335 |
| SEL1L            | 0.65 | 1.14E-02 | 0.0295 |
| RBMXL1           | 0.65 | 1.84E-02 | 0.0415 |
| RPL36A           | 0.65 | 6.80E-03 | 0.0206 |
| TMEM209          | 0.65 | 1.47E-02 | 0.0352 |
| LIG3             | 0.65 | 1.63E-02 | 0.0378 |
| CD81             | 0.65 | 1.44E-02 | 0.0348 |
| TMEM38B          | 0.65 | 1.71E-02 | 0.0392 |
| RIF1             | 0.65 | 1.10E-02 | 0.0287 |
| C2orf74          | 0.65 | 1.68E-02 | 0.0387 |
| NEPRO            | 0.65 | 1.63E-02 | 0.0379 |
| LTN1             | 0.65 | 1.01E-02 | 0.0269 |
| CEP170           | 0.65 | 1.00E-02 | 0.0268 |
| TBC1D9B          | 0.65 | 1.50E-02 | 0.0357 |
| RBM28            | 0.64 | 1.22E-02 | 0.0309 |
| TDRD7            | 0.64 | 2.39E-02 | 0.0499 |
| DIS3             | 0.64 | 1.10E-02 | 0.0287 |
| CWC22            | 0.64 | 1.11E-02 | 0.0289 |
| U2SURP           | 0.64 | 8.38E-03 | 0.0238 |
| ENST000002536921 | 0.64 | 1.78E-02 | 0.0404 |
| UGGT1            | 0.64 | 1.07E-02 | 0.0280 |
| MAN2B1           | 0.64 | 1.47E-02 | 0.0352 |
| ENST000003389700 | 0.64 | 1.82E-02 | 0.0410 |
| OARD1            | 0.64 | 1.22E-02 | 0.0308 |
| NME6             | 0.64 | 1.81E-02 | 0.0409 |
| GRK2             | 0.64 | 1.93E-02 | 0.0429 |
| CNBP             | 0.64 | 1.99E-02 | 0.0437 |
| ENST000003553541 | 0.64 | 1.60E-02 | 0.0375 |
| SUSD3            | 0.64 | 1.87E-02 | 0.0419 |
| KATNBL1          | 0.64 | 1.28E-02 | 0.0319 |
| EHMT2            | 0.63 | 1.72E-02 | 0.0394 |
| HMGXB3           | 0.63 | 1.77E-02 | 0.0401 |
| GRPEL2           | 0.63 | 1.58E-02 | 0.0371 |

|                  |      |          |        |
|------------------|------|----------|--------|
| RPS5             | 0.63 | 1.57E-02 | 0.0369 |
| RBBP4            | 0.63 | 1.29E-02 | 0.0321 |
| RN7SL1           | 0.63 | 3.74E-03 | 0.0140 |
| ENST000002569352 | 0.63 | 1.13E-02 | 0.0292 |
| FZR1             | 0.63 | 2.33E-02 | 0.0490 |
| MT-ND5           | 0.63 | 1.24E-02 | 0.0311 |
| ZDHHC5           | 0.63 | 1.37E-02 | 0.0335 |
| ZHX1             | 0.63 | 1.53E-02 | 0.0363 |
| SNRNP48          | 0.63 | 1.84E-02 | 0.0414 |
| SETD5            | 0.63 | 2.14E-02 | 0.0460 |
| TUBGCP2          | 0.63 | 2.28E-02 | 0.0481 |
| TAF9             | 0.63 | 2.09E-02 | 0.0453 |
| TRIP12           | 0.62 | 8.24E-03 | 0.0235 |
| KIF2A            | 0.62 | 1.27E-02 | 0.0318 |
| SQSTM1           | 0.62 | 1.28E-02 | 0.0319 |
| RDH14            | 0.62 | 1.76E-02 | 0.0400 |
| CCDC14           | 0.62 | 1.71E-02 | 0.0393 |
| TAF15            | 0.62 | 2.10E-02 | 0.0454 |
| ZBTB8OS          | 0.62 | 2.16E-02 | 0.0464 |
| POLDIP3          | 0.62 | 1.41E-02 | 0.0343 |
| CEBPZ            | 0.62 | 2.31E-02 | 0.0487 |
| TMSB10           | 0.62 | 1.07E-02 | 0.0281 |
| SLC15A4          | 0.61 | 2.32E-02 | 0.0488 |
| CSK              | 0.61 | 2.20E-02 | 0.0469 |
| TMED3            | 0.61 | 1.67E-02 | 0.0386 |
| UGP2             | 0.61 | 2.21E-02 | 0.0471 |
| SEC11A           | 0.61 | 1.99E-02 | 0.0437 |
| EXOC2            | 0.61 | 1.68E-02 | 0.0388 |
| CFAP97           | 0.61 | 2.14E-02 | 0.0460 |
| DNAJC7           | 0.61 | 1.70E-02 | 0.0392 |
| DCLRE1C          | 0.61 | 1.62E-02 | 0.0377 |
| UBC              | 0.61 | 7.39E-03 | 0.0219 |
| CMTR1            | 0.61 | 1.89E-02 | 0.0422 |
| EIF4B            | 0.61 | 1.17E-02 | 0.0300 |
| GOLGA5           | 0.61 | 1.49E-02 | 0.0355 |
| ELMSAN1          | 0.60 | 1.81E-02 | 0.0410 |
| RBM18            | 0.60 | 1.87E-02 | 0.0418 |
| MAP4K1           | 0.60 | 2.30E-02 | 0.0484 |
| GGPS1            | 0.60 | 1.71E-02 | 0.0392 |
| MGAT1            | 0.60 | 1.83E-02 | 0.0412 |
| PIIP5K1          | 0.60 | 2.06E-02 | 0.0448 |
| NVL              | 0.60 | 1.88E-02 | 0.0420 |
| NSRP1            | 0.60 | 1.86E-02 | 0.0418 |
| ENST000003010153 | 0.60 | 2.13E-02 | 0.0460 |
| PMS2CL           | 0.60 | 2.28E-02 | 0.0482 |
| DDX47            | 0.60 | 2.01E-02 | 0.0441 |
| ZFP91            | 0.60 | 1.69E-02 | 0.0388 |



|                  |      |          |        |
|------------------|------|----------|--------|
| PLEKHA8          | 0.60 | 2.38E-02 | 0.0497 |
| MVP              | 0.60 | 1.81E-02 | 0.0409 |
| NBR1             | 0.60 | 2.36E-02 | 0.0495 |
| TACC1            | 0.60 | 1.53E-02 | 0.0362 |
| RPL24            | 0.59 | 1.22E-02 | 0.0308 |
| ENST000002613401 | 0.59 | 2.08E-02 | 0.0452 |
| RAD17            | 0.59 | 1.66E-02 | 0.0383 |
| GPAT4            | 0.59 | 2.22E-02 | 0.0474 |
| SLC25A12         | 0.58 | 1.84E-02 | 0.0414 |
| HERPUD1          | 0.58 | 2.01E-02 | 0.0441 |
| EEF1AKMT2        | 0.58 | 2.20E-02 | 0.0470 |
| PJA1             | 0.58 | 2.32E-02 | 0.0487 |
| ZFAND1           | 0.58 | 1.55E-02 | 0.0365 |
| NCBP3            | 0.58 | 2.23E-02 | 0.0475 |
| P2RX7            | 0.58 | 2.28E-02 | 0.0482 |
| ANKRD27          | 0.58 | 1.79E-02 | 0.0406 |
| GLS              | 0.58 | 1.16E-02 | 0.0297 |
| GTF2A1           | 0.58 | 1.70E-02 | 0.0391 |
| ERLEC1           | 0.58 | 1.81E-02 | 0.0408 |
| NCOA4            | 0.58 | 1.53E-02 | 0.0362 |
| DCAF1            | 0.58 | 2.07E-02 | 0.0450 |
| ARIH2            | 0.58 | 1.63E-02 | 0.0379 |
| ZNF544           | 0.58 | 2.15E-02 | 0.0462 |
| UPF3A            | 0.58 | 2.00E-02 | 0.0439 |
| CSNK2A2          | 0.58 | 2.17E-02 | 0.0464 |
| AFTPH            | 0.57 | 2.08E-02 | 0.0452 |
| LINC01215        | 0.57 | 2.00E-02 | 0.0439 |
| ZNF197           | 0.57 | 2.13E-02 | 0.0460 |
| RPL7             | 0.57 | 1.53E-02 | 0.0361 |
| TRPM7            | 0.56 | 1.57E-02 | 0.0368 |
| ELOC             | 0.56 | 2.30E-02 | 0.0486 |
| PANK2            | 0.56 | 2.23E-02 | 0.0474 |
| ENST000003035382 | 0.56 | 1.66E-02 | 0.0383 |
| IGF2R            | 0.55 | 1.89E-02 | 0.0422 |
| SPAG9            | 0.55 | 1.75E-02 | 0.0400 |
| PTDSS1           | 0.55 | 1.86E-02 | 0.0417 |
| IL27RA           | 0.55 | 2.30E-02 | 0.0485 |
| AKAP11           | 0.55 | 1.89E-02 | 0.0421 |
| ENST000002992590 | 0.55 | 2.25E-02 | 0.0477 |
| EEF1B2           | 0.54 | 2.03E-02 | 0.0444 |
| SPOP             | 0.54 | 2.39E-02 | 0.0499 |
| SLC30A7          | 0.54 | 2.20E-02 | 0.0470 |
| UBR5             | 0.54 | 1.92E-02 | 0.0427 |
| DCP2             | 0.54 | 2.10E-02 | 0.0455 |
| CLK2             | 0.54 | 2.35E-02 | 0.0493 |
| XRN2             | 0.53 | 2.21E-02 | 0.0471 |
| YME1L1           | 0.52 | 2.06E-02 | 0.0448 |

|                  |       |          |        |
|------------------|-------|----------|--------|
| RPL10A           | 0.52  | 1.97E-02 | 0.0434 |
| EEF1G            | 0.50  | 2.13E-02 | 0.0459 |
| CNOT2            | -0.51 | 2.38E-02 | 0.0497 |
| LONP2            | -0.52 | 2.04E-02 | 0.0445 |
| PHIP             | -0.53 | 1.97E-02 | 0.0435 |
| ZBTB44           | -0.53 | 2.35E-02 | 0.0493 |
| WDR33            | -0.54 | 2.02E-02 | 0.0442 |
| SLMAP            | -0.55 | 2.25E-02 | 0.0477 |
| ENST000002856790 | -0.55 | 1.88E-02 | 0.0420 |
| ANKRD36C         | -0.56 | 1.56E-02 | 0.0366 |
| ATXN3            | -0.56 | 2.18E-02 | 0.0467 |
| RALGAPB          | -0.56 | 1.98E-02 | 0.0435 |
| ITSN2            | -0.56 | 1.66E-02 | 0.0383 |
| SCAF11           | -0.56 | 1.94E-02 | 0.0429 |
| MPHOSPH8         | -0.56 | 1.96E-02 | 0.0432 |
| MLLT10           | -0.56 | 2.36E-02 | 0.0494 |
| GLOD4            | -0.57 | 2.35E-02 | 0.0493 |
| ZNF644           | -0.57 | 1.87E-02 | 0.0419 |
| PIKFYVE          | -0.57 | 1.83E-02 | 0.0412 |
| KDM3A            | -0.57 | 2.14E-02 | 0.0460 |
| PDS5A            | -0.57 | 2.32E-02 | 0.0488 |
| ZNF791           | -0.58 | 1.91E-02 | 0.0426 |
| OGA              | -0.58 | 2.10E-02 | 0.0455 |
| PCGF5            | -0.58 | 1.81E-02 | 0.0409 |
| MAP3K2           | -0.58 | 1.35E-02 | 0.0332 |
| ZNF26            | -0.58 | 2.19E-02 | 0.0468 |
| PIGN             | -0.58 | 1.47E-02 | 0.0353 |
| DEGS1            | -0.58 | 1.92E-02 | 0.0426 |
| FOXO1            | -0.58 | 1.45E-02 | 0.0348 |
| RB1CC1           | -0.59 | 1.55E-02 | 0.0366 |
| CASP4            | -0.59 | 1.68E-02 | 0.0387 |
| COQ10B           | -0.59 | 2.04E-02 | 0.0445 |
| ZNF136           | -0.59 | 1.86E-02 | 0.0418 |
| CHKB             | -0.59 | 2.08E-02 | 0.0451 |
| FAM78A           | -0.59 | 2.15E-02 | 0.0462 |
| ENST000003343440 | -0.60 | 2.18E-02 | 0.0467 |
| LNPEP            | -0.60 | 1.60E-02 | 0.0374 |
| NUDT3            | -0.60 | 1.79E-02 | 0.0405 |
| KLHL5            | -0.60 | 1.95E-02 | 0.0432 |
| MED21            | -0.60 | 2.14E-02 | 0.0460 |
| PTPRJ            | -0.60 | 1.34E-02 | 0.0330 |
| COMMD6           | -0.61 | 2.39E-02 | 0.0499 |
| ARL6IP5          | -0.61 | 1.55E-02 | 0.0366 |
| PAPOLA           | -0.61 | 2.05E-02 | 0.0446 |
| FAM133B          | -0.61 | 2.06E-02 | 0.0449 |
| SP4              | -0.61 | 1.68E-02 | 0.0388 |
| CRACR2A          | -0.61 | 1.99E-02 | 0.0437 |

|                  |       |          |        |
|------------------|-------|----------|--------|
| MIA3             | -0.61 | 1.49E-02 | 0.0356 |
| LEMD3            | -0.61 | 1.86E-02 | 0.0416 |
| SFSWAP           | -0.61 | 1.72E-02 | 0.0394 |
| PHF3             | -0.62 | 1.01E-02 | 0.0269 |
| TFDP2            | -0.62 | 1.60E-02 | 0.0375 |
| SREK1            | -0.62 | 1.72E-02 | 0.0395 |
| RETREG3          | -0.62 | 1.65E-02 | 0.0382 |
| MPPE1            | -0.62 | 1.87E-02 | 0.0418 |
| TRAF5            | -0.62 | 1.64E-02 | 0.0381 |
| DIPK1A           | -0.62 | 1.86E-02 | 0.0418 |
| SOD2             | -0.62 | 1.72E-02 | 0.0394 |
| C12orf45         | -0.62 | 1.49E-02 | 0.0356 |
| ZNF431           | -0.62 | 2.31E-02 | 0.0487 |
| NUCB2            | -0.63 | 2.06E-02 | 0.0449 |
| TRA2B            | -0.63 | 1.85E-02 | 0.0415 |
| CCNDBP1          | -0.63 | 1.15E-02 | 0.0296 |
| C2CD3            | -0.63 | 2.10E-02 | 0.0454 |
| ZFAND5           | -0.63 | 1.46E-02 | 0.0351 |
| RBM5             | -0.63 | 1.12E-02 | 0.0290 |
| ENST000002952380 | -0.63 | 2.38E-02 | 0.0497 |
| POLR3E           | -0.63 | 2.16E-02 | 0.0464 |
| ZBED5            | -0.63 | 1.47E-02 | 0.0353 |
| PSME4            | -0.63 | 1.84E-02 | 0.0413 |
| DDB1             | -0.63 | 2.28E-02 | 0.0482 |
| DCAF16           | -0.63 | 2.16E-02 | 0.0464 |
| LRCH1            | -0.63 | 2.37E-02 | 0.0495 |
| HCG18            | -0.63 | 1.17E-02 | 0.0298 |
| TMEM123          | -0.64 | 2.33E-02 | 0.0490 |
| EXOC8            | -0.64 | 1.38E-02 | 0.0336 |
| TRAPPC2          | -0.64 | 1.95E-02 | 0.0431 |
| FAM98B           | -0.64 | 1.94E-02 | 0.0429 |
| CDR2             | -0.64 | 1.10E-02 | 0.0286 |
| NBPF8            | -0.64 | 1.38E-02 | 0.0336 |
| NBPF10           | -0.64 | 1.61E-02 | 0.0376 |
| CHD9             | -0.64 | 1.13E-02 | 0.0291 |
| NUTM2A-AS1       | -0.64 | 1.99E-02 | 0.0437 |
| COG1             | -0.65 | 1.97E-02 | 0.0435 |
| CNPY4            | -0.65 | 1.96E-02 | 0.0433 |
| TYW5             | -0.65 | 1.19E-02 | 0.0304 |
| STAG3L3          | -0.65 | 1.43E-02 | 0.0345 |
| SLC30A4          | -0.65 | 1.93E-02 | 0.0429 |
| RYK              | -0.65 | 1.21E-02 | 0.0307 |
| ARHGDIB          | -0.65 | 1.92E-02 | 0.0427 |
| TGFBR2           | -0.65 | 2.29E-02 | 0.0483 |
| GTF2IP1          | -0.65 | 2.05E-02 | 0.0447 |
| EBLN3P           | -0.66 | 1.68E-02 | 0.0387 |
| TRIM44           | -0.66 | 2.23E-02 | 0.0474 |

|                  |       |          |        |
|------------------|-------|----------|--------|
| FUS              | -0.66 | 2.10E-02 | 0.0455 |
| LCP2             | -0.66 | 1.14E-02 | 0.0293 |
| AL022311.1       | -0.66 | 1.36E-02 | 0.0333 |
| ZNF254           | -0.66 | 1.79E-02 | 0.0405 |
| ENST000003151831 | -0.66 | 1.27E-02 | 0.0317 |
| PRKCH            | -0.66 | 9.12E-03 | 0.0252 |
| MGAT5            | -0.66 | 1.60E-02 | 0.0373 |
| SECISBP2L        | -0.66 | 1.44E-02 | 0.0347 |
| RPL30            | -0.67 | 6.36E-03 | 0.0197 |
| AL390728.4       | -0.67 | 1.10E-02 | 0.0287 |
| FAM199X          | -0.67 | 1.39E-02 | 0.0338 |
| ATG12            | -0.67 | 9.36E-03 | 0.0256 |
| PCF11            | -0.67 | 1.87E-02 | 0.0419 |
| CLUAP1           | -0.67 | 2.04E-02 | 0.0445 |
| DOCK11           | -0.67 | 1.05E-02 | 0.0277 |
| PPM1A            | -0.67 | 1.06E-02 | 0.0279 |
| MLKL             | -0.67 | 2.08E-02 | 0.0451 |
| ENST000003677710 | -0.67 | 1.71E-02 | 0.0393 |
| NR2C1            | -0.67 | 1.25E-02 | 0.0313 |
| IFFO1            | -0.67 | 2.26E-02 | 0.0478 |
| COX10-AS1        | -0.68 | 1.30E-02 | 0.0323 |
| LUC7L3           | -0.68 | 7.60E-03 | 0.0223 |
| KANTR            | -0.68 | 2.14E-02 | 0.0460 |
| TOMM7            | -0.68 | 1.42E-02 | 0.0344 |
| ENST000002162642 | -0.68 | 2.12E-02 | 0.0458 |
| MFSD11           | -0.68 | 2.16E-02 | 0.0463 |
| VPS53            | -0.68 | 2.11E-02 | 0.0455 |
| ACVR1            | -0.68 | 1.92E-02 | 0.0426 |
| SPRYD4           | -0.68 | 1.87E-02 | 0.0418 |
| HIPK3            | -0.68 | 1.24E-02 | 0.0311 |
| PRPF38B          | -0.68 | 1.29E-02 | 0.0322 |
| NLRC5            | -0.68 | 9.11E-03 | 0.0252 |
| ADAM10           | -0.68 | 1.29E-02 | 0.0321 |
| SEPT7P2          | -0.69 | 2.10E-02 | 0.0454 |
| FTO              | -0.69 | 8.45E-03 | 0.0239 |
| AC092821.3       | -0.69 | 2.19E-02 | 0.0468 |
| FBXO25           | -0.69 | 1.44E-02 | 0.0347 |
| HECTD4           | -0.69 | 1.63E-02 | 0.0379 |
| RPS6KA5          | -0.69 | 8.77E-03 | 0.0245 |
| RAB18            | -0.69 | 1.29E-02 | 0.0322 |
| ENST000003084481 | -0.69 | 1.42E-02 | 0.0343 |
| CAMK2G           | -0.69 | 1.70E-02 | 0.0391 |
| ZNF37BP          | -0.69 | 1.20E-02 | 0.0305 |
| CBX7             | -0.69 | 2.04E-02 | 0.0445 |
| ZNF181           | -0.69 | 1.54E-02 | 0.0363 |
| HECA             | -0.70 | 6.65E-03 | 0.0204 |
| SULT1A1          | -0.70 | 2.18E-02 | 0.0467 |

|                  |       |          |        |
|------------------|-------|----------|--------|
| SAFB2            | -0.70 | 1.13E-02 | 0.0292 |
| ARAP2            | -0.70 | 7.14E-03 | 0.0213 |
| USP34            | -0.70 | 1.05E-02 | 0.0277 |
| ABHD17B          | -0.70 | 1.20E-02 | 0.0304 |
| TBC1D19          | -0.70 | 1.38E-02 | 0.0336 |
| AC013394.1       | -0.70 | 1.90E-02 | 0.0424 |
| HNRNPH1          | -0.70 | 2.13E-02 | 0.0460 |
| MSL2             | -0.70 | 7.92E-03 | 0.0229 |
| CD53             | -0.70 | 1.34E-02 | 0.0330 |
| ABCA5            | -0.70 | 7.51E-03 | 0.0221 |
| LINC00174        | -0.70 | 2.00E-02 | 0.0439 |
| VCPIP1           | -0.70 | 1.54E-02 | 0.0364 |
| VPS11            | -0.70 | 1.17E-02 | 0.0298 |
| ERC1             | -0.70 | 8.85E-03 | 0.0246 |
| RPS6KA3          | -0.70 | 2.03E-02 | 0.0444 |
| ENST000003267930 | -0.70 | 1.37E-02 | 0.0335 |
| CAPS2            | -0.71 | 1.96E-02 | 0.0433 |
| SARM1            | -0.71 | 2.07E-02 | 0.0450 |
| UST              | -0.71 | 2.23E-02 | 0.0475 |
| ZNF484           | -0.71 | 1.97E-02 | 0.0435 |
| THOC1            | -0.71 | 8.18E-03 | 0.0234 |
| PCSK7            | -0.71 | 6.99E-03 | 0.0210 |
| AC092652.2       | -0.71 | 1.77E-02 | 0.0401 |
| BCL2             | -0.71 | 2.20E-02 | 0.0469 |
| C20orf194        | -0.71 | 1.92E-02 | 0.0426 |
| RF00003.27       | -0.71 | 9.68E-03 | 0.0262 |
| RF00003.35       | -0.71 | 9.68E-03 | 0.0262 |
| RNU1-1           | -0.71 | 9.68E-03 | 0.0262 |
| RNU1-2           | -0.71 | 9.68E-03 | 0.0262 |
| RNU1-27P         | -0.71 | 9.68E-03 | 0.0262 |
| RNU1-28P         | -0.71 | 9.68E-03 | 0.0262 |
| RNU1-3           | -0.71 | 9.68E-03 | 0.0262 |
| RNU1-4           | -0.71 | 9.68E-03 | 0.0262 |
| RNVU1-18         | -0.71 | 9.68E-03 | 0.0262 |
| TRAF6            | -0.71 | 8.57E-03 | 0.0241 |
| ZNF566           | -0.71 | 1.26E-02 | 0.0315 |
| SLC39A10         | -0.71 | 1.04E-02 | 0.0275 |
| BEX2             | -0.72 | 1.87E-02 | 0.0419 |
| PRPF4B           | -0.72 | 1.05E-02 | 0.0278 |
| AC093752.1       | -0.72 | 1.04E-02 | 0.0276 |
| ZNF101           | -0.72 | 7.87E-03 | 0.0228 |
| PLXNA3           | -0.72 | 1.81E-02 | 0.0409 |
| ARID4A           | -0.72 | 1.24E-02 | 0.0312 |
| AL669831.5       | -0.72 | 1.74E-02 | 0.0398 |
| IDS              | -0.72 | 1.53E-02 | 0.0363 |
| EPM2AIP1         | -0.72 | 7.12E-03 | 0.0213 |
| ALG13            | -0.72 | 2.21E-02 | 0.0471 |

|                  |       |          |        |
|------------------|-------|----------|--------|
| KLHL36           | -0.72 | 1.07E-02 | 0.0280 |
| NBPF20           | -0.72 | 1.04E-02 | 0.0276 |
| SMG1P3           | -0.72 | 1.04E-02 | 0.0275 |
| FBXO7            | -0.72 | 6.39E-03 | 0.0198 |
| ENST000003128140 | -0.73 | 1.02E-02 | 0.0272 |
| ZNF527           | -0.73 | 1.12E-02 | 0.0290 |
| NAGK             | -0.73 | 1.29E-02 | 0.0321 |
| MTERF2           | -0.73 | 1.59E-02 | 0.0373 |
| TRAJ19           | -0.73 | 2.16E-02 | 0.0463 |
| TRBV7-9          | -0.73 | 1.94E-02 | 0.0429 |
| TAOK1            | -0.73 | 5.45E-03 | 0.0178 |
| TBCK             | -0.73 | 9.44E-03 | 0.0258 |
| COA1             | -0.73 | 7.17E-03 | 0.0214 |
| SMARCA2          | -0.73 | 2.15E-02 | 0.0461 |
| STYX             | -0.74 | 7.97E-03 | 0.0230 |
| RGS14            | -0.74 | 1.12E-02 | 0.0291 |
| ZNF430           | -0.74 | 1.51E-02 | 0.0358 |
| ISPD             | -0.74 | 1.99E-02 | 0.0437 |
| PIGC             | -0.74 | 1.56E-02 | 0.0366 |
| ENST000002644494 | -0.74 | 6.16E-03 | 0.0193 |
| ELOVL5           | -0.74 | 1.15E-02 | 0.0296 |
| CPEB2            | -0.74 | 2.20E-02 | 0.0469 |
| CDK17            | -0.74 | 1.48E-02 | 0.0354 |
| SMG1P1           | -0.74 | 1.85E-02 | 0.0416 |
| AL139385.1       | -0.74 | 2.26E-02 | 0.0479 |
| TMEM204          | -0.74 | 1.82E-02 | 0.0411 |
| NCOA1            | -0.74 | 7.87E-03 | 0.0228 |
| BCLAF1           | -0.74 | 7.18E-03 | 0.0214 |
| ENST000003180102 | -0.74 | 1.78E-02 | 0.0404 |
| AC024257.3       | -0.74 | 2.29E-02 | 0.0483 |
| TRMT2B           | -0.74 | 1.70E-02 | 0.0391 |
| GPATCH8          | -0.74 | 1.95E-02 | 0.0432 |
| SHPRH            | -0.74 | 8.32E-03 | 0.0236 |
| ARRB1            | -0.74 | 1.58E-02 | 0.0371 |
| OXR1             | -0.75 | 1.47E-02 | 0.0353 |
| YTHDC1           | -0.75 | 6.44E-03 | 0.0199 |
| TBC1D15          | -0.75 | 1.09E-02 | 0.0285 |
| AHSA2P           | -0.75 | 1.62E-02 | 0.0377 |
| ENST000002546050 | -0.75 | 2.09E-02 | 0.0453 |
| FBXW8            | -0.75 | 2.19E-02 | 0.0469 |
| ATXN1            | -0.75 | 1.77E-02 | 0.0402 |
| XPA              | -0.75 | 7.96E-03 | 0.0230 |
| SETD2            | -0.75 | 1.75E-02 | 0.0398 |
| NAF1             | -0.75 | 1.45E-02 | 0.0349 |
| OSER1            | -0.75 | 1.18E-02 | 0.0301 |
| STAM             | -0.75 | 1.16E-02 | 0.0298 |
| TMEM181          | -0.76 | 5.81E-03 | 0.0186 |

|                 |       |          |        |
|-----------------|-------|----------|--------|
| TXNDC16         | -0.76 | 1.67E-02 | 0.0385 |
| RFX7            | -0.76 | 2.07E-02 | 0.0449 |
| HELQ            | -0.76 | 1.59E-02 | 0.0372 |
| ZNF75A          | -0.76 | 1.76E-02 | 0.0401 |
| WNK1            | -0.76 | 8.49E-03 | 0.0240 |
| ZNF737          | -0.76 | 2.19E-02 | 0.0468 |
| AC092910.3      | -0.76 | 1.85E-02 | 0.0416 |
| TBRG1           | -0.76 | 7.04E-03 | 0.0212 |
| MYCBP2          | -0.76 | 3.96E-03 | 0.0145 |
| KLHL20          | -0.76 | 9.25E-03 | 0.0254 |
| CROCC           | -0.76 | 1.88E-02 | 0.0419 |
| SFMBT1          | -0.76 | 8.80E-03 | 0.0246 |
| RAP2B           | -0.76 | 2.16E-02 | 0.0463 |
| GUSBP9          | -0.76 | 1.68E-02 | 0.0387 |
| ITM2A           | -0.76 | 7.00E-03 | 0.0211 |
| PTPN12          | -0.77 | 1.73E-02 | 0.0396 |
| AK9             | -0.77 | 2.00E-02 | 0.0438 |
| LINC01550       | -0.77 | 2.13E-02 | 0.0459 |
| DNAJB14         | -0.77 | 4.27E-03 | 0.0152 |
| ZNF274          | -0.77 | 9.64E-03 | 0.0261 |
| ENST00000638491 | -0.77 | 1.08E-02 | 0.0283 |
| ZNF518B         | -0.77 | 8.60E-03 | 0.0242 |
| PXYLP1          | -0.77 | 1.30E-02 | 0.0323 |
| GPR89B          | -0.77 | 1.21E-02 | 0.0306 |
| ARID4B          | -0.77 | 6.90E-03 | 0.0208 |
| TRAK2           | -0.77 | 5.13E-03 | 0.0171 |
| ANKRD23         | -0.77 | 2.33E-02 | 0.0489 |
| SNRPN           | -0.77 | 2.37E-02 | 0.0496 |
| ZNF81           | -0.78 | 2.16E-02 | 0.0464 |
| ZNF337          | -0.78 | 7.09E-03 | 0.0212 |
| PDXDC2P-NPIP14P | -0.78 | 1.93E-02 | 0.0428 |
| MLLT3           | -0.78 | 1.52E-02 | 0.0361 |
| ANKEF1          | -0.78 | 2.02E-02 | 0.0442 |
| RBSN            | -0.78 | 9.24E-03 | 0.0254 |
| POFUT2          | -0.78 | 1.71E-02 | 0.0393 |
| CPSF6           | -0.78 | 5.03E-03 | 0.0169 |
| MDM4            | -0.78 | 1.67E-02 | 0.0385 |
| CDK13           | -0.78 | 4.76E-03 | 0.0163 |
| UBR3            | -0.78 | 4.49E-03 | 0.0157 |
| TM2D3           | -0.78 | 1.35E-02 | 0.0332 |
| CNNM3           | -0.78 | 1.59E-02 | 0.0371 |
| JAK1            | -0.78 | 4.46E-03 | 0.0156 |
| PAQR3           | -0.78 | 7.73E-03 | 0.0226 |
| ABHD3           | -0.78 | 1.25E-02 | 0.0314 |
| TRAPPC9         | -0.78 | 1.15E-02 | 0.0295 |
| LENG1           | -0.78 | 2.12E-02 | 0.0458 |
| KMT2E           | -0.78 | 1.73E-02 | 0.0395 |

|                  |       |          |        |
|------------------|-------|----------|--------|
| Z93930.2         | -0.78 | 1.96E-02 | 0.0432 |
| EIF4A2           | -0.78 | 1.21E-02 | 0.0307 |
| ARGLU1           | -0.78 | 4.70E-03 | 0.0162 |
| ERVK3-1          | -0.79 | 1.14E-02 | 0.0293 |
| ALG11            | -0.79 | 6.55E-03 | 0.0201 |
| NRIP1            | -0.79 | 1.32E-02 | 0.0326 |
| MFSD8            | -0.79 | 8.42E-03 | 0.0238 |
| MORC2            | -0.79 | 6.96E-03 | 0.0210 |
| TCEA1P2          | -0.79 | 1.58E-02 | 0.0371 |
| MYLK3            | -0.79 | 1.16E-02 | 0.0297 |
| GSTO2            | -0.79 | 1.98E-02 | 0.0435 |
| TRBV2            | -0.79 | 1.78E-02 | 0.0403 |
| NT5DC1           | -0.79 | 8.14E-03 | 0.0233 |
| TTC17            | -0.79 | 6.73E-03 | 0.0205 |
| ZC2HC1A          | -0.79 | 1.46E-02 | 0.0351 |
| TMEM138          | -0.79 | 1.46E-02 | 0.0350 |
| CAPN7            | -0.79 | 4.36E-03 | 0.0154 |
| SNX15            | -0.79 | 1.58E-02 | 0.0371 |
| RBM39            | -0.79 | 2.82E-03 | 0.0117 |
| NR1H2            | -0.80 | 1.39E-02 | 0.0338 |
| PRDM1            | -0.80 | 1.40E-02 | 0.0339 |
| AMMECR1          | -0.80 | 5.09E-03 | 0.0170 |
| LINC01697        | -0.80 | 2.30E-02 | 0.0484 |
| ENST000003130281 | -0.80 | 1.60E-02 | 0.0373 |
| TMEM117          | -0.80 | 1.54E-02 | 0.0364 |
| RASA1            | -0.80 | 1.27E-02 | 0.0317 |
| AC004889.1       | -0.80 | 1.57E-02 | 0.0370 |
| SUMF1            | -0.80 | 1.48E-02 | 0.0354 |
| SH3TC1           | -0.80 | 7.22E-03 | 0.0215 |
| ENST000002213550 | -0.80 | 1.31E-02 | 0.0324 |
| SHISA5           | -0.80 | 6.62E-03 | 0.0203 |
| INO80D           | -0.80 | 1.03E-02 | 0.0274 |
| MPRIP            | -0.80 | 4.46E-03 | 0.0156 |
| KDM6A            | -0.80 | 1.53E-02 | 0.0362 |
| ENST000002582293 | -0.80 | 5.12E-03 | 0.0171 |
| HNRNPA3          | -0.81 | 5.13E-03 | 0.0171 |
| PIK3CA           | -0.81 | 4.95E-03 | 0.0167 |
| RNF214           | -0.81 | 1.72E-02 | 0.0395 |
| NR3C1            | -0.81 | 8.51E-03 | 0.0240 |
| STK4             | -0.81 | 3.09E-03 | 0.0124 |
| AFF4             | -0.81 | 1.30E-02 | 0.0323 |
| ERVW-1           | -0.81 | 1.69E-02 | 0.0389 |
| ZZEF1            | -0.81 | 1.02E-02 | 0.0272 |
| RUFY3            | -0.81 | 1.01E-02 | 0.0269 |
| ZNF33A           | -0.81 | 1.03E-02 | 0.0274 |
| ZNF134           | -0.81 | 2.29E-02 | 0.0484 |
| ENST000002822724 | -0.81 | 1.05E-02 | 0.0276 |



|                  |       |          |        |
|------------------|-------|----------|--------|
| ERCC6L2          | -0.81 | 4.12E-03 | 0.0149 |
| THUMPD3-AS1      | -0.82 | 6.34E-03 | 0.0197 |
| FBXO33           | -0.82 | 4.53E-03 | 0.0158 |
| FCHSD1           | -0.82 | 1.49E-02 | 0.0356 |
| PHYKPL           | -0.82 | 2.32E-02 | 0.0488 |
| ICA1             | -0.82 | 1.91E-02 | 0.0426 |
| LYSMD4           | -0.82 | 8.95E-03 | 0.0249 |
| LTB4R            | -0.82 | 1.39E-02 | 0.0338 |
| ENST000002315243 | -0.82 | 6.22E-03 | 0.0194 |
| SLC35E3          | -0.82 | 1.79E-02 | 0.0405 |
| SYS1             | -0.82 | 1.73E-02 | 0.0396 |
| KDM4C            | -0.82 | 4.93E-03 | 0.0167 |
| TRAV21           | -0.82 | 1.87E-02 | 0.0418 |
| R3HDM2           | -0.82 | 1.85E-02 | 0.0415 |
| IBA57            | -0.82 | 8.15E-03 | 0.0233 |
| NOTCH4           | -0.82 | 2.25E-02 | 0.0477 |
| PACS2            | -0.82 | 1.60E-02 | 0.0374 |
| CWF19L2          | -0.82 | 4.78E-03 | 0.0164 |
| SNORD13E         | -0.82 | 2.31E-02 | 0.0486 |
| UTP18            | -0.82 | 1.01E-02 | 0.0269 |
| ZCCHC14          | -0.82 | 1.45E-02 | 0.0349 |
| CLN5             | -0.82 | 6.25E-03 | 0.0195 |
| ZDHHC17          | -0.82 | 4.29E-03 | 0.0153 |
| ZNF782           | -0.82 | 2.29E-02 | 0.0484 |
| SUGT1P3          | -0.82 | 1.29E-02 | 0.0321 |
| FLI1             | -0.82 | 3.75E-03 | 0.0140 |
| USP6NL           | -0.82 | 1.17E-02 | 0.0300 |
| ENST000003526890 | -0.82 | 3.64E-03 | 0.0137 |
| ENST000003182894 | -0.83 | 2.22E-02 | 0.0473 |
| KCNQ1            | -0.83 | 1.29E-02 | 0.0321 |
| AL158152.1       | -0.83 | 7.99E-03 | 0.0231 |
| HELB             | -0.83 | 9.66E-03 | 0.0262 |
| ASH1L-AS1        | -0.83 | 1.24E-02 | 0.0311 |
| ELP4             | -0.83 | 5.32E-03 | 0.0175 |
| CCNL2            | -0.83 | 5.99E-03 | 0.0190 |
| GMDS-DT          | -0.83 | 7.12E-03 | 0.0213 |
| 37316            | -0.83 | 1.26E-02 | 0.0315 |
| SLC12A9          | -0.83 | 7.75E-03 | 0.0226 |
| NORAD            | -0.83 | 6.47E-03 | 0.0199 |
| ENST000003569400 | -0.83 | 4.85E-03 | 0.0165 |
| AC087501.4       | -0.83 | 2.08E-02 | 0.0451 |
| ARHGAP5          | -0.84 | 9.45E-03 | 0.0258 |
| AFF1             | -0.84 | 1.64E-02 | 0.0380 |
| CLN3             | -0.84 | 1.11E-02 | 0.0288 |
| PDE4D            | -0.84 | 1.84E-02 | 0.0414 |
| DTNB             | -0.84 | 1.42E-02 | 0.0344 |
| BTBD8            | -0.84 | 1.12E-02 | 0.0290 |

|                  |       |          |        |
|------------------|-------|----------|--------|
| ENST000002880710 | -0.84 | 1.33E-02 | 0.0328 |
| MED17            | -0.84 | 4.79E-03 | 0.0164 |
| LINC01184        | -0.84 | 6.78E-03 | 0.0206 |
| BCO2             | -0.84 | 2.09E-02 | 0.0453 |
| BBX              | -0.84 | 4.80E-03 | 0.0164 |
| ENST000003485130 | -0.84 | 8.27E-03 | 0.0235 |
| TPM1             | -0.84 | 1.71E-02 | 0.0393 |
| ANKRD18A         | -0.84 | 1.89E-02 | 0.0421 |
| ENST000002263190 | -0.84 | 1.92E-02 | 0.0427 |
| C16orf72         | -0.84 | 6.92E-03 | 0.0209 |
| CSMD3            | -0.84 | 1.38E-02 | 0.0336 |
| ENST000003543630 | -0.84 | 2.08E-02 | 0.0452 |
| KLHL42           | -0.84 | 2.38E-02 | 0.0497 |
| ZNF780B          | -0.84 | 5.01E-03 | 0.0169 |
| AC118459.2       | -0.84 | 2.18E-02 | 0.0466 |
| ZNF75D           | -0.84 | 4.75E-03 | 0.0163 |
| NFRKB            | -0.84 | 1.09E-02 | 0.0285 |
| DDX3Y            | -0.85 | 2.72E-03 | 0.0115 |
| CD247            | -0.85 | 5.30E-03 | 0.0175 |
| NOP53            | -0.85 | 1.55E-02 | 0.0365 |
| AC093323.1       | -0.85 | 1.09E-02 | 0.0285 |
| SRSF6            | -0.85 | 7.53E-03 | 0.0221 |
| NDUFA6-DT        | -0.85 | 8.99E-03 | 0.0249 |
| KCNJ6            | -0.85 | 2.31E-02 | 0.0486 |
| TMUB2            | -0.85 | 1.39E-02 | 0.0337 |
| BRAF             | -0.85 | 1.76E-02 | 0.0400 |
| SZT2             | -0.85 | 4.85E-03 | 0.0165 |
| ENST000003365050 | -0.85 | 1.65E-02 | 0.0382 |
| PIGT             | -0.85 | 9.41E-03 | 0.0257 |
| ERCC6            | -0.86 | 1.13E-02 | 0.0292 |
| LRCH4            | -0.86 | 1.54E-02 | 0.0364 |
| DYRK1A           | -0.86 | 2.86E-03 | 0.0118 |
| AC027097.1       | -0.86 | 9.77E-03 | 0.0263 |
| ENST000003063780 | -0.86 | 2.25E-02 | 0.0477 |
| AP001029.2       | -0.86 | 1.42E-02 | 0.0344 |
| PIK3R3           | -0.86 | 1.75E-02 | 0.0399 |
| ZNF805           | -0.86 | 1.99E-02 | 0.0437 |
| GNPTG            | -0.86 | 9.37E-03 | 0.0256 |
| FBXL5            | -0.86 | 3.68E-03 | 0.0138 |
| IFNAR2           | -0.86 | 1.04E-02 | 0.0275 |
| ARPIN            | -0.86 | 2.34E-02 | 0.0491 |
| AL162171.3       | -0.86 | 2.13E-02 | 0.0459 |
| NPIP5            | -0.86 | 2.03E-02 | 0.0444 |
| ZNF577           | -0.86 | 1.83E-02 | 0.0413 |
| CASD1            | -0.86 | 5.48E-03 | 0.0179 |
| RPS2P44          | -0.86 | 1.90E-02 | 0.0423 |
| PHC1             | -0.86 | 6.06E-03 | 0.0191 |

|                  |       |          |        |
|------------------|-------|----------|--------|
| SNX30            | -0.86 | 4.27E-03 | 0.0152 |
| APOL3            | -0.86 | 3.58E-03 | 0.0136 |
| DIS3L2           | -0.86 | 6.02E-03 | 0.0191 |
| ENST000003387450 | -0.86 | 2.19E-02 | 0.0469 |
| ANKLE1           | -0.87 | 1.04E-02 | 0.0276 |
| JPX              | -0.87 | 5.44E-03 | 0.0178 |
| KBTBD2           | -0.87 | 4.12E-03 | 0.0149 |
| ATP2A3           | -0.87 | 8.64E-03 | 0.0243 |
| OTUD1            | -0.87 | 1.95E-02 | 0.0431 |
| TRG-AS1          | -0.87 | 9.27E-03 | 0.0254 |
| ARL4A            | -0.87 | 7.20E-03 | 0.0214 |
| ENST000002568580 | -0.87 | 1.38E-02 | 0.0337 |
| TBC1D2           | -0.87 | 1.77E-02 | 0.0403 |
| EID3             | -0.87 | 2.30E-02 | 0.0484 |
| N4BP2L1          | -0.87 | 1.23E-02 | 0.0310 |
| RNASEH2B         | -0.87 | 3.91E-03 | 0.0143 |
| AC093827.5       | -0.87 | 1.94E-02 | 0.0429 |
| AC005899.1       | -0.87 | 1.95E-02 | 0.0431 |
| SERINC1          | -0.87 | 4.03E-03 | 0.0146 |
| HEATR5B          | -0.87 | 4.80E-03 | 0.0164 |
| SNX13            | -0.87 | 3.09E-03 | 0.0124 |
| NUBPL            | -0.87 | 1.57E-02 | 0.0370 |
| LINC00514        | -0.87 | 2.03E-02 | 0.0444 |
| ENST000003386371 | -0.87 | 2.39E-02 | 0.0499 |
| HLA-E            | -0.87 | 2.08E-03 | 0.0098 |
| LINC00652        | -0.87 | 1.89E-02 | 0.0422 |
| AC245452.1       | -0.87 | 1.45E-02 | 0.0349 |
| TSGA10           | -0.87 | 1.31E-02 | 0.0324 |
| CPEB3            | -0.87 | 1.71E-02 | 0.0392 |
| YAF2             | -0.88 | 3.27E-03 | 0.0128 |
| TBC1D8B          | -0.88 | 4.59E-03 | 0.0159 |
| RBM26            | -0.88 | 4.97E-03 | 0.0168 |
| SUCO             | -0.88 | 5.71E-03 | 0.0184 |
| ZMAT3            | -0.88 | 4.01E-03 | 0.0146 |
| ZNF549           | -0.88 | 5.89E-03 | 0.0188 |
| EML4             | -0.88 | 2.71E-03 | 0.0114 |
| CCDC69           | -0.88 | 9.35E-03 | 0.0256 |
| TARSL2           | -0.88 | 9.92E-03 | 0.0266 |
| AL158064.1       | -0.88 | 2.17E-02 | 0.0466 |
| KMT5B            | -0.88 | 4.58E-03 | 0.0159 |
| HEBP2            | -0.88 | 9.03E-03 | 0.0250 |
| SIVA1            | -0.88 | 6.65E-03 | 0.0203 |
| AL353622.1       | -0.88 | 1.92E-02 | 0.0427 |
| PPIEL            | -0.88 | 2.34E-02 | 0.0492 |
| NPHP3            | -0.88 | 6.26E-03 | 0.0195 |
| STAG3L1          | -0.88 | 1.89E-02 | 0.0422 |
| ENST000002981590 | -0.88 | 1.66E-02 | 0.0384 |

|                  |       |          |        |
|------------------|-------|----------|--------|
| ENST000003987520 | -0.88 | 7.77E-03 | 0.0226 |
| LINC00680        | -0.88 | 1.09E-02 | 0.0285 |
| GSTK1            | -0.88 | 4.86E-03 | 0.0165 |
| AKAP9            | -0.88 | 2.05E-03 | 0.0097 |
| MPP7             | -0.88 | 1.12E-02 | 0.0290 |
| KLHL7-DT         | -0.88 | 6.79E-03 | 0.0206 |
| PARVG            | -0.88 | 3.58E-03 | 0.0136 |
| APH1B            | -0.88 | 6.32E-03 | 0.0196 |
| INO80C           | -0.88 | 1.01E-02 | 0.0270 |
| ZNF335           | -0.89 | 1.32E-02 | 0.0325 |
| ENST000002801541 | -0.89 | 3.82E-03 | 0.0141 |
| MALAT1           | -0.89 | 4.89E-03 | 0.0166 |
| RTP4             | -0.89 | 1.34E-02 | 0.0330 |
| ENST000002860630 | -0.89 | 1.80E-02 | 0.0407 |
| RAB11FIP2        | -0.89 | 6.52E-03 | 0.0201 |
| NIN              | -0.89 | 6.97E-03 | 0.0210 |
| MINDY3           | -0.89 | 3.62E-03 | 0.0137 |
| MBTPS1           | -0.89 | 5.00E-03 | 0.0168 |
| ENST000003155851 | -0.89 | 1.35E-02 | 0.0331 |
| AC090114.2       | -0.89 | 8.67E-03 | 0.0243 |
| LENG8            | -0.89 | 5.41E-03 | 0.0178 |
| PLOD2            | -0.89 | 1.81E-02 | 0.0410 |
| ENST000002489010 | -0.89 | 6.50E-03 | 0.0200 |
| LUC7L            | -0.89 | 3.68E-03 | 0.0138 |
| STK17B           | -0.89 | 2.78E-03 | 0.0116 |
| AC010907.2       | -0.89 | 2.11E-02 | 0.0456 |
| IKZF1            | -0.89 | 1.16E-02 | 0.0298 |
| LINC01694        | -0.89 | 1.07E-02 | 0.0280 |
| MRPS30-DT        | -0.89 | 1.42E-02 | 0.0343 |
| ZNF586           | -0.89 | 3.89E-03 | 0.0143 |
| EDEM3            | -0.89 | 8.22E-03 | 0.0234 |
| CCDC191          | -0.89 | 1.32E-02 | 0.0326 |
| HLA-F-AS1        | -0.89 | 2.19E-02 | 0.0469 |
| SBDS             | -0.89 | 5.45E-03 | 0.0178 |
| ENST000003202203 | -0.89 | 1.13E-02 | 0.0292 |
| LINC00458        | -0.89 | 1.57E-02 | 0.0369 |
| TOM1L2           | -0.89 | 2.14E-02 | 0.0460 |
| BCL7A            | -0.89 | 7.80E-03 | 0.0227 |
| AKAP13           | -0.89 | 5.83E-03 | 0.0187 |
| AP001505.1       | -0.89 | 1.77E-02 | 0.0402 |
| ANKRD31          | -0.89 | 1.71E-02 | 0.0392 |
| ZNF554           | -0.89 | 1.80E-02 | 0.0408 |
| FBXO24           | -0.89 | 1.88E-02 | 0.0421 |
| TTC13            | -0.89 | 4.86E-03 | 0.0165 |
| BCDIN3D-AS1      | -0.89 | 2.33E-02 | 0.0490 |
| TTC3             | -0.89 | 3.72E-03 | 0.0139 |
| MON2             | -0.90 | 2.58E-03 | 0.0111 |

|                  |       |          |        |
|------------------|-------|----------|--------|
| PIAS1            | -0.90 | 5.19E-03 | 0.0173 |
| ZNF800           | -0.90 | 3.09E-03 | 0.0124 |
| HAAO             | -0.90 | 1.91E-02 | 0.0425 |
| ARSG             | -0.90 | 8.24E-03 | 0.0235 |
| ZNF611           | -0.90 | 6.10E-03 | 0.0192 |
| AC019155.2       | -0.90 | 1.99E-02 | 0.0437 |
| DPY19L1P1        | -0.90 | 1.33E-02 | 0.0329 |
| WWC3             | -0.90 | 1.27E-02 | 0.0318 |
| CCNT2            | -0.90 | 2.64E-03 | 0.0113 |
| SDHA             | -0.90 | 4.02E-03 | 0.0146 |
| AL590065.1       | -0.90 | 1.37E-02 | 0.0335 |
| ATRX             | -0.90 | 1.81E-03 | 0.0090 |
| RPAP2            | -0.90 | 2.37E-03 | 0.0105 |
| LIPG             | -0.90 | 1.32E-02 | 0.0326 |
| ZNF783           | -0.90 | 1.03E-02 | 0.0272 |
| TMEM213          | -0.90 | 1.96E-02 | 0.0433 |
| FITM2            | -0.90 | 1.59E-02 | 0.0372 |
| MANBA            | -0.90 | 1.40E-02 | 0.0341 |
| SUGT1            | -0.90 | 6.52E-03 | 0.0201 |
| AC087276.1       | -0.90 | 1.95E-02 | 0.0431 |
| ZNF573           | -0.90 | 4.76E-03 | 0.0163 |
| TPT1             | -0.90 | 1.78E-03 | 0.0089 |
| AC022558.2       | -0.90 | 1.57E-02 | 0.0369 |
| SEMA4C           | -0.91 | 5.64E-03 | 0.0183 |
| ENST000002908550 | -0.91 | 5.42E-03 | 0.0178 |
| THEMIS2          | -0.91 | 6.94E-03 | 0.0209 |
| FOXJ3            | -0.91 | 6.19E-03 | 0.0194 |
| RABL2A           | -0.91 | 1.18E-02 | 0.0300 |
| PLK3             | -0.91 | 1.48E-02 | 0.0354 |
| TOGARAM1         | -0.91 | 4.93E-03 | 0.0167 |
| TSPYL4           | -0.91 | 5.63E-03 | 0.0182 |
| HAUS3            | -0.91 | 3.11E-03 | 0.0124 |
| YY2              | -0.91 | 1.71E-02 | 0.0392 |
| AL136295.7       | -0.91 | 9.21E-03 | 0.0254 |
| ANK3             | -0.91 | 2.57E-03 | 0.0111 |
| PPP3CC           | -0.91 | 3.03E-03 | 0.0122 |
| TTC28-AS1        | -0.91 | 8.37E-03 | 0.0237 |
| ENST000002531592 | -0.91 | 9.54E-03 | 0.0260 |
| SNRPA1           | -0.91 | 5.24E-03 | 0.0174 |
| DENND1B          | -0.91 | 2.79E-03 | 0.0116 |
| STXBP4           | -0.91 | 1.50E-02 | 0.0357 |
| STIM2            | -0.92 | 3.90E-03 | 0.0143 |
| ZNF213-AS1       | -0.92 | 1.70E-02 | 0.0391 |
| TNKS             | -0.92 | 7.20E-03 | 0.0214 |
| PPP1R3E          | -0.92 | 1.91E-02 | 0.0424 |
| TBC1D10C         | -0.92 | 3.94E-03 | 0.0144 |
| OR111            | -0.92 | 2.22E-02 | 0.0473 |

|                  |       |          |        |
|------------------|-------|----------|--------|
| UXS1             | -0.92 | 4.79E-03 | 0.0164 |
| AL513523.1       | -0.92 | 1.24E-02 | 0.0311 |
| AL513523.5       | -0.92 | 1.24E-02 | 0.0311 |
| POLR2J3          | -0.92 | 5.39E-03 | 0.0177 |
| NBPF11           | -0.92 | 1.97E-02 | 0.0434 |
| AC027514.1       | -0.92 | 1.74E-02 | 0.0398 |
| MAN2B2           | -0.92 | 7.97E-03 | 0.0230 |
| SMAD5            | -0.92 | 5.00E-03 | 0.0168 |
| SLC27A1          | -0.92 | 8.44E-03 | 0.0239 |
| NPIP4            | -0.92 | 8.79E-03 | 0.0245 |
| SPOCK2           | -0.92 | 2.01E-03 | 0.0096 |
| AC005838.2       | -0.93 | 1.28E-02 | 0.0319 |
| EPB41L5          | -0.93 | 6.86E-03 | 0.0208 |
| CAMKMT           | -0.93 | 9.96E-03 | 0.0267 |
| LFNG             | -0.93 | 5.09E-03 | 0.0171 |
| PPP1R12B         | -0.93 | 7.73E-03 | 0.0226 |
| RUFY2            | -0.93 | 1.23E-02 | 0.0310 |
| RCOR3            | -0.93 | 9.14E-03 | 0.0252 |
| CCDC169          | -0.93 | 9.51E-03 | 0.0259 |
| TMX4             | -0.93 | 1.21E-02 | 0.0307 |
| FAM47E           | -0.93 | 1.22E-02 | 0.0308 |
| AMN1             | -0.93 | 1.88E-02 | 0.0419 |
| NBPF12           | -0.93 | 5.43E-03 | 0.0178 |
| PGRMC2           | -0.93 | 5.01E-03 | 0.0169 |
| MOK              | -0.93 | 1.61E-02 | 0.0375 |
| DMTF1            | -0.93 | 2.86E-03 | 0.0118 |
| AC083798.2       | -0.93 | 8.37E-03 | 0.0238 |
| C9orf147         | -0.93 | 1.16E-02 | 0.0297 |
| ARHGAP4          | -0.93 | 4.63E-03 | 0.0160 |
| ENST000003430171 | -0.93 | 1.42E-02 | 0.0345 |
| ZNF862           | -0.93 | 2.23E-02 | 0.0475 |
| ZNF502           | -0.94 | 1.97E-02 | 0.0435 |
| AP005131.6       | -0.94 | 2.17E-02 | 0.0464 |
| COL6A2           | -0.94 | 9.57E-03 | 0.0260 |
| LINC01226        | -0.94 | 5.35E-03 | 0.0176 |
| DNAJB9           | -0.94 | 4.44E-03 | 0.0156 |
| KAT6A            | -0.94 | 2.43E-03 | 0.0107 |
| AC016831.6       | -0.94 | 1.74E-02 | 0.0398 |
| AC004812.2       | -0.94 | 1.17E-02 | 0.0299 |
| TEPSIN           | -0.94 | 8.05E-03 | 0.0231 |
| ENST000002619731 | -0.94 | 2.46E-03 | 0.0108 |
| NPEPL1           | -0.94 | 9.48E-03 | 0.0258 |
| ERBIN            | -0.94 | 1.95E-03 | 0.0094 |
| AL158154.2       | -0.94 | 1.18E-02 | 0.0302 |
| PHF21A           | -0.94 | 2.26E-02 | 0.0479 |
| AKNA             | -0.94 | 1.77E-02 | 0.0402 |
| LINC01748        | -0.94 | 1.95E-02 | 0.0431 |

|                  |       |          |        |
|------------------|-------|----------|--------|
| PSMB8-AS1        | -0.95 | 4.54E-03 | 0.0158 |
| ENST000003098630 | -0.95 | 6.75E-03 | 0.0206 |
| WDR26            | -0.95 | 1.50E-02 | 0.0357 |
| AC010601.1       | -0.95 | 7.55E-03 | 0.0222 |
| ENST000003582320 | -0.95 | 8.65E-03 | 0.0243 |
| PHACTR2          | -0.95 | 2.30E-03 | 0.0104 |
| AC018521.7       | -0.95 | 2.18E-02 | 0.0467 |
| KLF8             | -0.95 | 1.79E-02 | 0.0405 |
| AL133245.1       | -0.95 | 1.78E-02 | 0.0404 |
| PLPP2            | -0.95 | 1.12E-02 | 0.0290 |
| AC091078.3       | -0.95 | 9.20E-03 | 0.0253 |
| FYCO1            | -0.95 | 8.39E-03 | 0.0238 |
| AC084083.1       | -0.95 | 1.02E-02 | 0.0271 |
| SNORD15B         | -0.95 | 6.19E-03 | 0.0194 |
| MORC4            | -0.95 | 4.64E-03 | 0.0161 |
| AF131215.6       | -0.95 | 1.44E-02 | 0.0348 |
| RGPD6            | -0.95 | 9.30E-03 | 0.0255 |
| SLFN12L          | -0.95 | 8.85E-03 | 0.0246 |
| AC137932.3       | -0.96 | 1.23E-02 | 0.0311 |
| ARL2BP           | -0.96 | 1.58E-02 | 0.0371 |
| HSPBAP1          | -0.96 | 8.78E-03 | 0.0245 |
| OR6C75           | -0.96 | 2.05E-02 | 0.0447 |
| AL390838.1       | -0.96 | 1.50E-02 | 0.0358 |
| DNAJC27-AS1      | -0.96 | 2.06E-02 | 0.0448 |
| SLC38A6          | -0.96 | 1.31E-02 | 0.0325 |
| ZBTB1            | -0.96 | 2.09E-03 | 0.0098 |
| ZAP70            | -0.96 | 2.18E-03 | 0.0100 |
| ENST000002889851 | -0.96 | 2.83E-03 | 0.0117 |
| AC004834.1       | -0.96 | 1.36E-02 | 0.0333 |
| NIPBL            | -0.96 | 1.86E-03 | 0.0092 |
| CCSER2           | -0.96 | 1.98E-03 | 0.0095 |
| HLA-DOA          | -0.96 | 1.40E-02 | 0.0341 |
| RSBN1            | -0.96 | 3.91E-03 | 0.0143 |
| PIGS             | -0.96 | 6.08E-03 | 0.0192 |
| ASH1L            | -0.96 | 4.37E-03 | 0.0155 |
| AC130466.1       | -0.96 | 1.74E-02 | 0.0397 |
| AC092326.1       | -0.96 | 1.40E-02 | 0.0340 |
| AC246789.2       | -0.96 | 1.40E-02 | 0.0340 |
| AL138889.1       | -0.96 | 1.01E-02 | 0.0270 |
| ZNF487           | -0.96 | 6.56E-03 | 0.0201 |
| ENST000002215612 | -0.97 | 8.19E-03 | 0.0234 |
| AL163051.2       | -0.97 | 1.15E-02 | 0.0295 |
| LINC02073        | -0.97 | 1.07E-02 | 0.0281 |
| CLIP4            | -0.97 | 4.81E-03 | 0.0164 |
| CIRBP            | -0.97 | 9.40E-03 | 0.0257 |
| TPD52L1          | -0.97 | 1.86E-02 | 0.0417 |
| MAN2A1           | -0.97 | 1.80E-03 | 0.0090 |

|                  |       |          |        |
|------------------|-------|----------|--------|
| TRBV5-1          | -0.97 | 2.01E-02 | 0.0441 |
| AC117382.1       | -0.97 | 1.00E-02 | 0.0267 |
| STXBP5           | -0.97 | 2.60E-03 | 0.0112 |
| TRBV18           | -0.97 | 9.47E-03 | 0.0258 |
| CRYBG1           | -0.97 | 2.99E-03 | 0.0121 |
| LINC01902        | -0.97 | 1.56E-02 | 0.0368 |
| MNT              | -0.97 | 7.58E-03 | 0.0222 |
| TMEM80           | -0.97 | 8.90E-03 | 0.0247 |
| PROX1-AS1        | -0.97 | 1.14E-02 | 0.0293 |
| MAP4K4           | -0.97 | 3.51E-03 | 0.0134 |
| CDRT4            | -0.97 | 1.18E-02 | 0.0301 |
| ZNF655           | -0.97 | 2.21E-03 | 0.0101 |
| STAG3L5P         | -0.97 | 2.95E-03 | 0.0120 |
| CCDC122          | -0.97 | 7.22E-03 | 0.0215 |
| TMEM245          | -0.97 | 4.36E-03 | 0.0154 |
| BCL2L15          | -0.97 | 1.31E-02 | 0.0325 |
| ENST000003438820 | -0.97 | 7.78E-03 | 0.0226 |
| HIP1R            | -0.98 | 3.75E-03 | 0.0140 |
| GCSAM            | -0.98 | 4.42E-03 | 0.0155 |
| PTS              | -0.98 | 3.01E-03 | 0.0122 |
| ARID2            | -0.98 | 5.63E-03 | 0.0182 |
| PPP1R13B         | -0.98 | 9.76E-03 | 0.0263 |
| AC138409.2       | -0.98 | 6.03E-03 | 0.0191 |
| EIF5A2           | -0.98 | 1.51E-02 | 0.0358 |
| LINC02274        | -0.98 | 1.44E-02 | 0.0348 |
| CNKSR2           | -0.98 | 6.25E-03 | 0.0195 |
| AC087623.2       | -0.98 | 2.03E-02 | 0.0444 |
| ENST000003084880 | -0.98 | 2.83E-03 | 0.0117 |
| MICAL1           | -0.98 | 5.12E-03 | 0.0171 |
| HELZ             | -0.98 | 9.30E-03 | 0.0255 |
| PRMT2            | -0.98 | 1.39E-02 | 0.0338 |
| GLG1             | -0.98 | 2.07E-03 | 0.0097 |
| ENST000002633980 | -0.98 | 2.19E-03 | 0.0100 |
| EIF5             | -0.98 | 3.76E-03 | 0.0140 |
| USHBP1           | -0.98 | 1.62E-02 | 0.0377 |
| DIP2A            | -0.98 | 4.52E-03 | 0.0158 |
| TRAJ25           | -0.98 | 2.19E-02 | 0.0468 |
| ZNF609           | -0.98 | 3.89E-03 | 0.0143 |
| H6PD             | -0.98 | 9.91E-03 | 0.0266 |
| TSIX             | -0.98 | 7.15E-03 | 0.0213 |
| STK33            | -0.98 | 7.62E-03 | 0.0223 |
| RASA2            | -0.99 | 1.53E-03 | 0.0082 |
| JMJD1C           | -0.99 | 4.19E-03 | 0.0151 |
| AL805961.1       | -0.99 | 2.28E-02 | 0.0482 |
| AL627230.2       | -0.99 | 2.19E-02 | 0.0468 |
| TLL2             | -0.99 | 2.12E-02 | 0.0457 |
| ENST00000623111  | -0.99 | 6.14E-03 | 0.0193 |



|                  |       |          |        |
|------------------|-------|----------|--------|
| IL6R             | -0.99 | 8.99E-03 | 0.0249 |
| MTERF4           | -0.99 | 7.02E-03 | 0.0211 |
| CEP95            | -0.99 | 2.32E-03 | 0.0104 |
| CLIP2            | -0.99 | 1.14E-02 | 0.0293 |
| CTNNA2           | -0.99 | 1.64E-02 | 0.0380 |
| BCAS4            | -0.99 | 4.10E-03 | 0.0149 |
| TBCEL            | -0.99 | 5.59E-03 | 0.0181 |
| C3orf62          | -0.99 | 6.40E-03 | 0.0198 |
| LEF1-AS1         | -0.99 | 5.58E-03 | 0.0181 |
| HSPA1L           | -0.99 | 8.84E-03 | 0.0246 |
| PLEKHA5          | -0.99 | 2.50E-03 | 0.0109 |
| PRKCQ-AS1        | -0.99 | 3.05E-03 | 0.0123 |
| TMC7             | -0.99 | 1.62E-02 | 0.0377 |
| AC005304.2       | -0.99 | 6.41E-03 | 0.0198 |
| NXPE3            | -0.99 | 3.43E-03 | 0.0132 |
| ENAH             | -0.99 | 2.12E-02 | 0.0457 |
| TRPM3            | -0.99 | 1.02E-02 | 0.0272 |
| ENST000002861860 | -0.99 | 8.35E-03 | 0.0237 |
| LINC00852        | -0.99 | 2.32E-02 | 0.0488 |
| ZBTB25           | -0.99 | 1.66E-03 | 0.0086 |
| LINC00923        | -1.00 | 2.07E-02 | 0.0450 |
| TTC32            | -1.00 | 6.04E-03 | 0.0191 |
| CFAP70           | -1.00 | 8.21E-03 | 0.0234 |
| PCDHA4           | -1.00 | 4.49E-03 | 0.0157 |
| FCHSD2           | -1.00 | 2.31E-02 | 0.0487 |
| TDRD3            | -1.00 | 2.28E-03 | 0.0103 |
| ITGA9-AS1        | -1.00 | 8.15E-03 | 0.0233 |
| TMEM131          | -1.00 | 2.42E-03 | 0.0107 |
| TFCP2L1          | -1.00 | 1.30E-02 | 0.0323 |
| ENST000003173361 | -1.00 | 5.94E-03 | 0.0189 |
| IRF1             | -1.00 | 1.81E-03 | 0.0090 |
| AC011337.1       | -1.00 | 2.04E-02 | 0.0445 |
| THEM4            | -1.00 | 2.77E-03 | 0.0116 |
| AL132656.2       | -1.00 | 7.96E-03 | 0.0230 |
| MRTFB            | -1.00 | 2.73E-03 | 0.0115 |
| CFAP69           | -1.00 | 9.90E-03 | 0.0266 |
| ENST000003108621 | -1.00 | 1.12E-02 | 0.0291 |
| AL157392.3       | -1.00 | 2.06E-02 | 0.0449 |
| ATG14            | -1.00 | 3.06E-03 | 0.0123 |
| VGLL3            | -1.00 | 2.10E-02 | 0.0455 |
| UBXN4            | -1.00 | 3.76E-03 | 0.0140 |
| PIK3CB           | -1.00 | 6.68E-03 | 0.0204 |
| AC007620.2       | -1.00 | 1.57E-02 | 0.0369 |
| ENST000003008230 | -1.00 | 1.37E-02 | 0.0336 |
| ZNF19            | -1.00 | 1.53E-02 | 0.0363 |
| ABCB9            | -1.00 | 8.49E-03 | 0.0240 |
| SLC2A1-AS1       | -1.01 | 1.27E-02 | 0.0318 |

|                 |       |          |        |
|-----------------|-------|----------|--------|
| AL117378.1      | -1.01 | 9.06E-03 | 0.0251 |
| AC009120.2      | -1.01 | 7.14E-03 | 0.0213 |
| FRMD3           | -1.01 | 1.69E-02 | 0.0388 |
| ADGRF1          | -1.01 | 8.20E-03 | 0.0234 |
| ADAMTSL4-AS1    | -1.01 | 9.53E-03 | 0.0259 |
| GNAQ            | -1.01 | 1.91E-03 | 0.0093 |
| SNHG14          | -1.01 | 1.01E-02 | 0.0269 |
| AC008938.1      | -1.01 | 1.50E-02 | 0.0357 |
| LAPTM5          | -1.01 | 1.37E-02 | 0.0335 |
| TMEM45B         | -1.01 | 9.11E-03 | 0.0252 |
| MORC3           | -1.01 | 1.46E-03 | 0.0080 |
| CDC37L1-DT      | -1.01 | 1.52E-02 | 0.0361 |
| AC079316.1      | -1.01 | 2.05E-02 | 0.0447 |
| SERPINA10       | -1.01 | 5.46E-03 | 0.0179 |
| C14orf28        | -1.01 | 9.25E-03 | 0.0254 |
| RELA            | -1.01 | 1.07E-02 | 0.0282 |
| ANKRD49         | -1.01 | 1.77E-03 | 0.0089 |
| ETFRF1          | -1.01 | 7.51E-03 | 0.0221 |
| CNST            | -1.01 | 1.97E-03 | 0.0095 |
| TGFB1           | -1.01 | 4.50E-03 | 0.0157 |
| AKTIP           | -1.01 | 4.26E-03 | 0.0152 |
| DENND2A         | -1.01 | 1.63E-02 | 0.0379 |
| ZNF407          | -1.01 | 1.90E-03 | 0.0093 |
| CARF            | -1.01 | 6.96E-03 | 0.0210 |
| BLMH            | -1.02 | 4.28E-03 | 0.0153 |
| EVI2A           | -1.02 | 3.23E-03 | 0.0127 |
| LINC01609       | -1.02 | 1.13E-02 | 0.0292 |
| ASPH            | -1.02 | 4.35E-03 | 0.0154 |
| SLC2A11         | -1.02 | 8.32E-03 | 0.0236 |
| DDR1-DT         | -1.02 | 4.33E-03 | 0.0154 |
| ARL17B          | -1.02 | 4.48E-03 | 0.0157 |
| UGCG            | -1.02 | 3.01E-03 | 0.0122 |
| CCDC88C         | -1.02 | 4.66E-03 | 0.0161 |
| TESPA1          | -1.02 | 1.70E-02 | 0.0392 |
| IGIP            | -1.02 | 4.98E-03 | 0.0168 |
| SCARNA13        | -1.02 | 3.72E-03 | 0.0139 |
| TSPYL1          | -1.02 | 2.15E-03 | 0.0099 |
| SUGT1P4-STRA6LP | -1.02 | 5.36E-03 | 0.0176 |
| ATP8B2          | -1.02 | 6.35E-03 | 0.0197 |
| HMG1P3          | -1.02 | 1.21E-02 | 0.0307 |
| BTBD9           | -1.02 | 7.01E-03 | 0.0211 |
| ELF2            | -1.02 | 2.45E-03 | 0.0108 |
| AC009318.1      | -1.02 | 1.99E-02 | 0.0437 |
| SLC35D2         | -1.03 | 1.07E-02 | 0.0280 |
| AC011474.1      | -1.03 | 2.24E-02 | 0.0476 |
| IFT80           | -1.03 | 1.77E-03 | 0.0089 |
| SERTAD2         | -1.03 | 6.68E-03 | 0.0204 |

|                  |       |          |        |
|------------------|-------|----------|--------|
| APLF             | -1.03 | 1.86E-02 | 0.0417 |
| FKBP11           | -1.03 | 4.05E-03 | 0.0147 |
| NSUN5P2          | -1.03 | 4.23E-03 | 0.0152 |
| AL359955.1       | -1.03 | 1.48E-02 | 0.0355 |
| RUNX1            | -1.03 | 3.90E-03 | 0.0143 |
| OSBPL7           | -1.03 | 1.93E-02 | 0.0428 |
| NKD1             | -1.03 | 1.72E-02 | 0.0394 |
| ZNF280D          | -1.03 | 3.08E-03 | 0.0123 |
| ATF7IP           | -1.03 | 3.81E-03 | 0.0141 |
| CASC15           | -1.03 | 1.41E-02 | 0.0341 |
| MIR100HG         | -1.03 | 7.52E-03 | 0.0221 |
| TRAJ12           | -1.03 | 7.11E-03 | 0.0213 |
| AC100774.1       | -1.03 | 1.11E-02 | 0.0288 |
| AC011511.1       | -1.03 | 1.46E-02 | 0.0351 |
| MTMR10           | -1.03 | 2.65E-03 | 0.0113 |
| TAS2R20          | -1.03 | 1.54E-02 | 0.0365 |
| TUG1             | -1.03 | 1.49E-03 | 0.0081 |
| AC116351.1       | -1.03 | 8.40E-03 | 0.0238 |
| AC116351.3       | -1.03 | 8.40E-03 | 0.0238 |
| C9orf139         | -1.04 | 2.26E-02 | 0.0478 |
| YLPM1            | -1.04 | 2.11E-03 | 0.0098 |
| PKN2             | -1.04 | 2.58E-03 | 0.0111 |
| ENST000003601561 | -1.04 | 5.04E-03 | 0.0169 |
| MAP2K5           | -1.04 | 6.14E-03 | 0.0193 |
| FAR2P2           | -1.04 | 1.49E-02 | 0.0355 |
| MBTD1            | -1.04 | 1.97E-03 | 0.0095 |
| ZFAND6           | -1.04 | 1.35E-03 | 0.0076 |
| SYNRG            | -1.04 | 2.23E-03 | 0.0101 |
| CERKL            | -1.04 | 1.71E-02 | 0.0393 |
| SLC25A53         | -1.04 | 4.57E-03 | 0.0159 |
| PLEKHF2          | -1.04 | 1.58E-03 | 0.0083 |
| FAM66E           | -1.04 | 1.84E-02 | 0.0414 |
| TEX9             | -1.04 | 1.43E-02 | 0.0346 |
| CPEB1            | -1.04 | 1.56E-02 | 0.0368 |
| MATN1-AS1        | -1.04 | 1.55E-02 | 0.0365 |
| ENST000002678071 | -1.04 | 2.81E-03 | 0.0117 |
| TLK1             | -1.04 | 2.16E-03 | 0.0099 |
| SPIB             | -1.04 | 1.35E-02 | 0.0332 |
| SMURF2           | -1.04 | 4.25E-03 | 0.0152 |
| PCMTD2           | -1.04 | 9.86E-03 | 0.0265 |
| ENST000003142611 | -1.04 | 4.19E-03 | 0.0151 |
| RNASEL           | -1.04 | 2.50E-03 | 0.0109 |
| FAM160B1         | -1.04 | 2.97E-03 | 0.0121 |
| RGL4             | -1.04 | 1.87E-02 | 0.0418 |
| HERC2P3          | -1.04 | 1.30E-02 | 0.0323 |
| AC092017.4       | -1.04 | 9.99E-03 | 0.0267 |
| AC002558.3       | -1.05 | 9.62E-03 | 0.0261 |

|                  |       |          |        |
|------------------|-------|----------|--------|
| ASAH1            | -1.05 | 4.75E-03 | 0.0163 |
| NPIP13           | -1.05 | 2.12E-02 | 0.0457 |
| ENST00000641520  | -1.05 | 5.31E-03 | 0.0175 |
| AC018647.2       | -1.05 | 5.93E-03 | 0.0189 |
| SAMMSON          | -1.05 | 1.62E-02 | 0.0378 |
| LINC01579        | -1.05 | 1.93E-02 | 0.0428 |
| LINC01761        | -1.05 | 6.98E-03 | 0.0210 |
| PAXIP1-AS2       | -1.05 | 5.20E-03 | 0.0173 |
| CACNA1A          | -1.05 | 6.75E-03 | 0.0206 |
| FNDC3B           | -1.05 | 2.58E-03 | 0.0111 |
| RBM48            | -1.05 | 2.50E-03 | 0.0109 |
| XAF1             | -1.05 | 8.03E-03 | 0.0231 |
| CHD6             | -1.05 | 1.82E-03 | 0.0090 |
| SRP54-AS1        | -1.05 | 6.06E-03 | 0.0191 |
| HGSNAT           | -1.05 | 6.37E-03 | 0.0197 |
| TRBV12-3         | -1.05 | 1.92E-02 | 0.0427 |
| ILKAP            | -1.05 | 3.08E-03 | 0.0123 |
| MOB2             | -1.05 | 4.05E-03 | 0.0147 |
| IL16             | -1.05 | 2.97E-03 | 0.0121 |
| TTY15            | -1.05 | 1.43E-03 | 0.0079 |
| AC011726.2       | -1.05 | 9.52E-03 | 0.0259 |
| ZBTB8B           | -1.05 | 9.12E-03 | 0.0252 |
| AC012435.1       | -1.05 | 1.19E-02 | 0.0304 |
| DAGLB            | -1.05 | 1.20E-02 | 0.0305 |
| AC069222.1       | -1.05 | 1.21E-02 | 0.0308 |
| CHIC1            | -1.05 | 6.88E-03 | 0.0208 |
| WTIP             | -1.05 | 5.24E-03 | 0.0174 |
| ZNF92            | -1.05 | 4.19E-03 | 0.0151 |
| CLSTN1           | -1.05 | 8.32E-03 | 0.0236 |
| AC245078.1       | -1.05 | 1.15E-02 | 0.0295 |
| SRGAP1           | -1.05 | 8.98E-03 | 0.0249 |
| PLCD1            | -1.05 | 4.60E-03 | 0.0160 |
| GRTP1            | -1.06 | 1.90E-02 | 0.0423 |
| ENST000002971090 | -1.06 | 6.26E-03 | 0.0195 |
| KLHDC2           | -1.06 | 2.33E-03 | 0.0104 |
| ENST000003443370 | -1.06 | 2.82E-03 | 0.0117 |
| OR2G6            | -1.06 | 7.22E-03 | 0.0215 |
| CROCCP3          | -1.06 | 5.15E-03 | 0.0172 |
| LRRC39           | -1.06 | 1.58E-02 | 0.0370 |
| RIC3             | -1.06 | 6.18E-03 | 0.0194 |
| AL080317.1       | -1.06 | 2.15E-02 | 0.0461 |
| WAC-AS1          | -1.06 | 2.13E-03 | 0.0099 |
| AC012213.2       | -1.06 | 1.40E-02 | 0.0341 |
| SMC2-AS1         | -1.06 | 5.78E-03 | 0.0186 |
| NAV1             | -1.06 | 4.11E-03 | 0.0149 |
| ZNF792           | -1.06 | 1.02E-02 | 0.0272 |
| AL355312.2       | -1.06 | 2.29E-02 | 0.0483 |

|                  |       |          |        |
|------------------|-------|----------|--------|
| SCARNA2          | -1.06 | 4.39E-03 | 0.0155 |
| MBNL3            | -1.06 | 2.64E-03 | 0.0113 |
| CCNL2P1          | -1.06 | 1.85E-02 | 0.0416 |
| HCG27            | -1.06 | 1.22E-02 | 0.0309 |
| ARHGAP45         | -1.06 | 1.77E-03 | 0.0089 |
| ECHDC2           | -1.07 | 4.56E-03 | 0.0159 |
| BICD1            | -1.07 | 1.62E-02 | 0.0378 |
| RREB1            | -1.07 | 7.11E-03 | 0.0213 |
| PCIF1            | -1.07 | 5.93E-03 | 0.0189 |
| YBX1             | -1.07 | 1.75E-02 | 0.0399 |
| ARRDC3-AS1       | -1.07 | 2.01E-02 | 0.0440 |
| LDLRAD4          | -1.07 | 1.98E-03 | 0.0095 |
| ENST000003357273 | -1.07 | 2.13E-02 | 0.0459 |
| SUCLG2-AS1       | -1.07 | 1.58E-02 | 0.0370 |
| BTD              | -1.07 | 3.83E-03 | 0.0142 |
| TMC4             | -1.07 | 2.16E-02 | 0.0463 |
| CCDC186          | -1.07 | 1.13E-03 | 0.0069 |
| POPDC2           | -1.07 | 1.14E-02 | 0.0293 |
| FRS2             | -1.07 | 3.94E-03 | 0.0144 |
| NMT2             | -1.07 | 2.84E-03 | 0.0117 |
| SRRM1            | -1.07 | 2.58E-03 | 0.0111 |
| AC009120.1       | -1.07 | 1.43E-02 | 0.0346 |
| AC092447.5       | -1.07 | 1.15E-02 | 0.0295 |
| KANK1            | -1.07 | 3.01E-03 | 0.0122 |
| ORMDL1           | -1.07 | 2.40E-03 | 0.0107 |
| OR2A5            | -1.07 | 2.02E-02 | 0.0442 |
| AC105429.1       | -1.07 | 7.37E-03 | 0.0218 |
| AC108676.1       | -1.07 | 5.86E-03 | 0.0187 |
| BAALC-AS1        | -1.08 | 1.44E-02 | 0.0347 |
| B4GALNT2         | -1.08 | 4.83E-03 | 0.0165 |
| AC015971.1       | -1.08 | 1.47E-02 | 0.0352 |
| CAPRIN2          | -1.08 | 2.55E-03 | 0.0111 |
| VPS8             | -1.08 | 1.90E-03 | 0.0093 |
| ENST000003006191 | -1.08 | 1.37E-03 | 0.0077 |
| TECPR1           | -1.08 | 1.66E-03 | 0.0086 |
| GCC2             | -1.08 | 3.15E-03 | 0.0125 |
| OR52K1           | -1.08 | 6.28E-03 | 0.0195 |
| AC004918.1       | -1.08 | 8.32E-03 | 0.0236 |
| AC004918.2       | -1.08 | 8.32E-03 | 0.0236 |
| AGO4             | -1.08 | 1.41E-03 | 0.0078 |
| AC034213.1       | -1.08 | 5.98E-03 | 0.0190 |
| ETS1             | -1.08 | 1.02E-03 | 0.0065 |
| LIPT1            | -1.08 | 5.21E-03 | 0.0173 |
| NECAP1           | -1.08 | 1.83E-03 | 0.0091 |
| HSBP1L1          | -1.08 | 1.23E-02 | 0.0311 |
| SNX18P3          | -1.08 | 4.34E-03 | 0.0154 |
| HSD17B11         | -1.08 | 3.29E-03 | 0.0129 |

|                  |       |          |        |
|------------------|-------|----------|--------|
| GUSBP2           | -1.08 | 5.52E-03 | 0.0180 |
| ENST000002646580 | -1.08 | 8.21E-03 | 0.0234 |
| ENST000002950950 | -1.08 | 9.86E-04 | 0.0064 |
| LINC01695        | -1.08 | 6.83E-03 | 0.0207 |
| P2RY10           | -1.08 | 1.24E-03 | 0.0073 |
| OR7D4            | -1.08 | 1.84E-02 | 0.0414 |
| FBXO44           | -1.08 | 1.27E-02 | 0.0317 |
| B3GALT4          | -1.08 | 1.51E-02 | 0.0358 |
| CEMIP2           | -1.08 | 4.26E-03 | 0.0152 |
| ESYT2            | -1.08 | 1.07E-03 | 0.0067 |
| AC008982.2       | -1.08 | 1.72E-02 | 0.0394 |
| AC008982.4       | -1.08 | 1.72E-02 | 0.0394 |
| FAM120C          | -1.08 | 1.53E-02 | 0.0362 |
| TIGD1            | -1.08 | 2.01E-03 | 0.0096 |
| CELF2            | -1.08 | 1.12E-03 | 0.0068 |
| PINK1            | -1.08 | 5.41E-03 | 0.0178 |
| WDPCP            | -1.09 | 2.44E-03 | 0.0107 |
| RTKN2            | -1.09 | 3.46E-03 | 0.0133 |
| DIRC2            | -1.09 | 8.30E-03 | 0.0236 |
| ZNF493           | -1.09 | 6.94E-03 | 0.0209 |
| AL022323.4       | -1.09 | 3.78E-03 | 0.0141 |
| TAS2R15P         | -1.09 | 8.09E-03 | 0.0232 |
| BEX4             | -1.09 | 3.46E-03 | 0.0133 |
| ZFYVE28          | -1.09 | 4.64E-03 | 0.0161 |
| RHOH             | -1.09 | 1.98E-03 | 0.0095 |
| AC099811.1       | -1.09 | 1.33E-02 | 0.0328 |
| AC091491.1       | -1.09 | 2.25E-02 | 0.0477 |
| ENST000002640651 | -1.09 | 2.34E-03 | 0.0105 |
| PRORS1P          | -1.09 | 6.35E-03 | 0.0197 |
| ZSWIM7           | -1.09 | 1.86E-02 | 0.0417 |
| JAZF1            | -1.09 | 1.40E-02 | 0.0340 |
| AC124312.5       | -1.09 | 2.52E-03 | 0.0110 |
| DDX59            | -1.09 | 3.90E-03 | 0.0143 |
| ZFP3             | -1.09 | 5.54E-03 | 0.0181 |
| ENST000003558390 | -1.09 | 1.63E-02 | 0.0379 |
| AC139494.1       | -1.09 | 3.83E-03 | 0.0142 |
| L3HYPDH          | -1.09 | 3.32E-03 | 0.0129 |
| PATL2            | -1.09 | 3.37E-03 | 0.0131 |
| MICU3            | -1.09 | 6.44E-03 | 0.0199 |
| BTN3A2           | -1.10 | 1.84E-02 | 0.0414 |
| ZNF14            | -1.10 | 7.07E-03 | 0.0212 |
| AC139769.1       | -1.10 | 1.58E-02 | 0.0371 |
| AC015969.1       | -1.10 | 1.92E-02 | 0.0426 |
| FMR1             | -1.10 | 2.49E-03 | 0.0109 |
| CEACAM22P        | -1.10 | 1.12E-02 | 0.0290 |
| TRIM23           | -1.10 | 1.97E-02 | 0.0435 |
| LINC01238        | -1.10 | 8.12E-03 | 0.0233 |

|                  |       |          |        |
|------------------|-------|----------|--------|
| CMTM8            | -1.10 | 6.87E-03 | 0.0208 |
| SLC4A8           | -1.10 | 9.56E-03 | 0.0260 |
| AC105760.2       | -1.10 | 8.04E-03 | 0.0231 |
| PNISR            | -1.10 | 1.45E-03 | 0.0080 |
| AC092656.1       | -1.10 | 8.25E-03 | 0.0235 |
| AP002387.1       | -1.10 | 8.03E-03 | 0.0231 |
| AL353743.1       | -1.10 | 1.20E-02 | 0.0305 |
| WASL             | -1.10 | 1.05E-02 | 0.0278 |
| SWT1             | -1.10 | 6.04E-03 | 0.0191 |
| TMEM131L         | -1.10 | 2.89E-03 | 0.0119 |
| OR4F17           | -1.10 | 8.86E-03 | 0.0246 |
| AC104109.4       | -1.10 | 9.38E-03 | 0.0257 |
| SHISA9           | -1.10 | 1.02E-02 | 0.0272 |
| AC108866.1       | -1.10 | 2.32E-02 | 0.0488 |
| UBE2Q2           | -1.10 | 2.10E-03 | 0.0098 |
| AL035071.1       | -1.10 | 6.99E-03 | 0.0210 |
| DMAP1            | -1.10 | 3.16E-03 | 0.0125 |
| PSTK             | -1.10 | 3.70E-03 | 0.0139 |
| ATP8A1           | -1.10 | 8.71E-03 | 0.0244 |
| ZNF83            | -1.10 | 1.27E-03 | 0.0074 |
| AL360270.2       | -1.10 | 1.87E-03 | 0.0092 |
| AC004817.4       | -1.10 | 3.76E-03 | 0.0140 |
| DNMBP-AS1        | -1.10 | 1.27E-02 | 0.0318 |
| RBMS1            | -1.10 | 8.19E-03 | 0.0234 |
| RBM43            | -1.10 | 8.75E-03 | 0.0245 |
| CCDC66           | -1.10 | 2.44E-03 | 0.0107 |
| ZNF362           | -1.10 | 7.04E-03 | 0.0211 |
| RN7SKP95         | -1.11 | 1.59E-02 | 0.0373 |
| DNASE1           | -1.11 | 3.87E-03 | 0.0143 |
| SIK3             | -1.11 | 2.59E-03 | 0.0112 |
| RNF216           | -1.11 | 2.65E-03 | 0.0113 |
| CLK4             | -1.11 | 1.48E-03 | 0.0080 |
| IQSEC1           | -1.11 | 1.51E-02 | 0.0359 |
| PTCHD1           | -1.11 | 7.98E-03 | 0.0230 |
| AP001059.2       | -1.11 | 1.41E-02 | 0.0342 |
| NAP1L3           | -1.11 | 8.23E-03 | 0.0235 |
| AC021086.1       | -1.11 | 2.25E-02 | 0.0477 |
| CR383656.13      | -1.11 | 1.35E-02 | 0.0332 |
| ENST000002621890 | -1.11 | 6.97E-03 | 0.0210 |
| ERVK9-11         | -1.11 | 9.51E-03 | 0.0259 |
| TEN1-CDK3        | -1.11 | 3.75E-03 | 0.0140 |
| FCAR             | -1.11 | 1.81E-02 | 0.0408 |
| FLT3LG           | -1.11 | 9.09E-03 | 0.0251 |
| ATP10B           | -1.11 | 8.80E-03 | 0.0246 |
| TSPAN6           | -1.11 | 7.61E-03 | 0.0223 |
| SH3BGRL          | -1.11 | 1.21E-03 | 0.0072 |
| NRBP2            | -1.11 | 1.82E-02 | 0.0410 |

|                  |       |          |        |
|------------------|-------|----------|--------|
| SBDSP1           | -1.11 | 5.04E-03 | 0.0169 |
| AP000866.6       | -1.11 | 9.19E-03 | 0.0253 |
| CBX4             | -1.11 | 4.81E-03 | 0.0164 |
| KATNAL2          | -1.11 | 1.25E-02 | 0.0314 |
| AC099518.5       | -1.12 | 2.13E-02 | 0.0458 |
| PELI1            | -1.12 | 1.69E-03 | 0.0087 |
| AC002519.1       | -1.12 | 7.20E-03 | 0.0214 |
| LINC02193        | -1.12 | 1.64E-02 | 0.0381 |
| OSER1-DT         | -1.12 | 3.96E-03 | 0.0145 |
| AC007000.1       | -1.12 | 2.22E-02 | 0.0473 |
| MEF2A            | -1.12 | 3.01E-03 | 0.0122 |
| LRRC37B          | -1.12 | 4.39E-03 | 0.0155 |
| LINC02018        | -1.12 | 9.23E-03 | 0.0254 |
| HERC2P9          | -1.12 | 4.68E-03 | 0.0162 |
| SMURF2P1         | -1.12 | 9.13E-03 | 0.0252 |
| AP000866.1       | -1.12 | 4.62E-03 | 0.0160 |
| NAA16            | -1.12 | 1.58E-03 | 0.0083 |
| AL356481.3       | -1.12 | 1.11E-02 | 0.0288 |
| GHET1            | -1.12 | 3.64E-03 | 0.0137 |
| CCBE1            | -1.12 | 9.39E-03 | 0.0257 |
| 38777            | -1.12 | 1.86E-03 | 0.0092 |
| SCARNA9          | -1.12 | 1.54E-03 | 0.0082 |
| AC084855.2       | -1.12 | 1.96E-02 | 0.0433 |
| AL117379.1       | -1.12 | 1.96E-02 | 0.0433 |
| NOSIP            | -1.12 | 1.57E-03 | 0.0083 |
| AL590666.3       | -1.12 | 1.59E-02 | 0.0372 |
| ZNF571           | -1.12 | 3.68E-03 | 0.0138 |
| PCDHA9           | -1.12 | 1.32E-02 | 0.0326 |
| SUSD1            | -1.12 | 3.91E-03 | 0.0144 |
| ENST000003160051 | -1.12 | 1.45E-02 | 0.0349 |
| CXorf65          | -1.13 | 5.15E-03 | 0.0172 |
| ENST000002959000 | -1.13 | 1.15E-02 | 0.0296 |
| AC005332.6       | -1.13 | 1.11E-02 | 0.0288 |
| HERPUD2          | -1.13 | 1.39E-03 | 0.0077 |
| SMG1P4           | -1.13 | 5.75E-03 | 0.0185 |
| DGKD             | -1.13 | 4.55E-03 | 0.0158 |
| ZNF251           | -1.13 | 3.28E-03 | 0.0128 |
| PLEKHM3          | -1.13 | 2.76E-03 | 0.0116 |
| UGGT2            | -1.13 | 1.05E-02 | 0.0277 |
| AL358334.2       | -1.13 | 1.05E-02 | 0.0278 |
| WDFY2            | -1.13 | 1.96E-03 | 0.0094 |
| KAT2B            | -1.13 | 3.92E-03 | 0.0144 |
| TRAJ42           | -1.13 | 9.17E-03 | 0.0253 |
| PLCB2            | -1.13 | 1.87E-02 | 0.0418 |
| CLDND1           | -1.13 | 9.57E-03 | 0.0260 |
| BTBD11           | -1.13 | 7.32E-03 | 0.0217 |
| KCNQ1OT1         | -1.13 | 2.62E-03 | 0.0112 |



|                |       |          |        |
|----------------|-------|----------|--------|
| ATP6V1G1       | -1.13 | 1.76E-03 | 0.0089 |
| ANKRD12        | -1.13 | 8.95E-04 | 0.0061 |
| FOCAD          | -1.13 | 2.08E-02 | 0.0451 |
| TRAJ4          | -1.13 | 2.24E-02 | 0.0475 |
| TINCR          | -1.13 | 1.94E-02 | 0.0429 |
| SEPT2          | -1.13 | 2.50E-03 | 0.0109 |
| GBP4           | -1.13 | 7.60E-03 | 0.0223 |
| AC124312.4     | -1.13 | 1.56E-02 | 0.0368 |
| MLXIP          | -1.13 | 2.72E-03 | 0.0115 |
| ADGRV1         | -1.13 | 8.79E-03 | 0.0245 |
| CYTH1          | -1.13 | 1.18E-03 | 0.0070 |
| TAS2R19        | -1.13 | 1.22E-02 | 0.0308 |
| AC025171.1     | -1.13 | 7.37E-03 | 0.0218 |
| AC017081.4     | -1.13 | 1.12E-02 | 0.0290 |
| DBP            | -1.13 | 5.01E-03 | 0.0169 |
| MBP            | -1.13 | 1.79E-03 | 0.0090 |
| AL450384.2     | -1.14 | 6.00E-03 | 0.0190 |
| OR5AU1         | -1.14 | 1.83E-02 | 0.0413 |
| RNF216P1       | -1.14 | 2.24E-03 | 0.0102 |
| AL136038.4     | -1.14 | 1.37E-02 | 0.0336 |
| USP9Y          | -1.14 | 7.34E-04 | 0.0055 |
| MGC27382       | -1.14 | 3.69E-03 | 0.0139 |
| ZNF641         | -1.14 | 3.00E-03 | 0.0121 |
| EFCAB6         | -1.14 | 1.02E-02 | 0.0272 |
| UBL3           | -1.14 | 2.81E-03 | 0.0117 |
| KRT18P31       | -1.14 | 6.81E-03 | 0.0207 |
| HIVEP2         | -1.14 | 1.36E-03 | 0.0076 |
| CAPN2          | -1.14 | 1.24E-03 | 0.0073 |
| AC090515.2     | -1.14 | 9.27E-03 | 0.0254 |
| RAB30          | -1.14 | 1.99E-02 | 0.0438 |
| CDC42SE2       | -1.14 | 8.29E-04 | 0.0058 |
| AC004918.3     | -1.14 | 3.79E-03 | 0.0141 |
| AC007780.1     | -1.14 | 1.34E-02 | 0.0329 |
| GREM1          | -1.14 | 5.25E-03 | 0.0174 |
| AL589642.2     | -1.15 | 3.45E-03 | 0.0132 |
| AL117336.3     | -1.15 | 6.91E-03 | 0.0209 |
| AP000640.2     | -1.15 | 8.59E-03 | 0.0242 |
| AC097359.2     | -1.15 | 1.97E-02 | 0.0435 |
| ZNF345         | -1.15 | 6.82E-03 | 0.0207 |
| CCNH           | -1.15 | 9.29E-04 | 0.0062 |
| SEPSECS-AS1    | -1.15 | 1.58E-03 | 0.0083 |
| AL450384.1     | -1.15 | 2.23E-02 | 0.0474 |
| SLC25A21       | -1.15 | 2.20E-02 | 0.0470 |
| KANK2          | -1.15 | 6.49E-03 | 0.0200 |
| TMEM110-MUSTN1 | -1.15 | 1.07E-02 | 0.0280 |
| FAM95C         | -1.15 | 5.81E-03 | 0.0186 |
| AC138393.1     | -1.15 | 1.30E-02 | 0.0323 |

|                  |       |          |        |
|------------------|-------|----------|--------|
| CSF2RB           | -1.15 | 6.75E-03 | 0.0206 |
| AP001469.3       | -1.15 | 4.78E-03 | 0.0164 |
| GXYLT2           | -1.15 | 1.72E-02 | 0.0394 |
| SMIM31           | -1.15 | 1.80E-02 | 0.0408 |
| KIAA0355         | -1.15 | 1.43E-03 | 0.0079 |
| ZNF224           | -1.15 | 3.82E-03 | 0.0141 |
| RPL29P14         | -1.15 | 1.90E-02 | 0.0423 |
| LYSMD3           | -1.15 | 6.02E-03 | 0.0191 |
| PDE3A            | -1.15 | 9.91E-03 | 0.0266 |
| COL5A3           | -1.15 | 1.09E-02 | 0.0285 |
| ATXN7L3B         | -1.15 | 2.10E-03 | 0.0098 |
| ZNF880           | -1.15 | 9.09E-03 | 0.0251 |
| FBXL2            | -1.16 | 1.97E-02 | 0.0434 |
| LMCD1-AS1        | -1.16 | 7.00E-03 | 0.0211 |
| TUBA3FP          | -1.16 | 2.09E-02 | 0.0452 |
| MAN1A2           | -1.16 | 1.61E-03 | 0.0084 |
| PPP1CB           | -1.16 | 1.94E-03 | 0.0094 |
| AC040162.1       | -1.16 | 2.79E-03 | 0.0116 |
| AC243960.11      | -1.16 | 1.40E-02 | 0.0339 |
| CRIP1            | -1.16 | 1.02E-02 | 0.0272 |
| AC016582.3       | -1.16 | 3.05E-03 | 0.0123 |
| AC025031.4       | -1.16 | 1.83E-02 | 0.0413 |
| LINC02068        | -1.16 | 8.70E-03 | 0.0244 |
| LINC00939        | -1.16 | 8.72E-03 | 0.0244 |
| PLEKHM1P1        | -1.16 | 1.93E-03 | 0.0094 |
| TRAJ50           | -1.16 | 7.78E-03 | 0.0226 |
| LINC01427        | -1.16 | 1.19E-02 | 0.0303 |
| DICER1-AS1       | -1.16 | 5.57E-03 | 0.0181 |
| ENST000003152510 | -1.16 | 9.29E-03 | 0.0255 |
| AC021016.2       | -1.16 | 3.44E-03 | 0.0132 |
| RBM33            | -1.16 | 2.69E-03 | 0.0114 |
| RPL7L1P10        | -1.16 | 1.85E-02 | 0.0416 |
| REPS2            | -1.16 | 4.53E-03 | 0.0158 |
| MX2              | -1.16 | 1.19E-02 | 0.0304 |
| CA5A             | -1.16 | 7.63E-03 | 0.0223 |
| CNBD2            | -1.16 | 1.20E-02 | 0.0304 |
| CSF2RA           | -1.16 | 4.83E-03 | 0.0165 |
| ENST000003739540 | -1.16 | 2.41E-03 | 0.0107 |
| KCNV1            | -1.16 | 7.03E-03 | 0.0211 |
| CHMP1B           | -1.16 | 9.80E-04 | 0.0064 |
| TRAPPC3L         | -1.16 | 2.58E-03 | 0.0111 |
| AC006509.1       | -1.16 | 8.79E-03 | 0.0245 |
| LINC01362        | -1.17 | 1.94E-02 | 0.0430 |
| RPS27            | -1.17 | 6.35E-04 | 0.0051 |
| TUT4             | -1.17 | 3.71E-03 | 0.0139 |
| ANOS2P           | -1.17 | 1.62E-02 | 0.0377 |
| NBPF9            | -1.17 | 6.84E-04 | 0.0053 |

|                  |       |          |        |
|------------------|-------|----------|--------|
| GARS-DT          | -1.17 | 3.47E-03 | 0.0133 |
| EFHC1            | -1.17 | 3.38E-03 | 0.0131 |
| LINC01537        | -1.17 | 4.96E-03 | 0.0167 |
| FBXW7            | -1.17 | 8.17E-04 | 0.0058 |
| C9orf72          | -1.17 | 2.07E-03 | 0.0097 |
| TJP1             | -1.17 | 2.20E-02 | 0.0470 |
| DHRS1            | -1.17 | 7.49E-03 | 0.0221 |
| FBXO11           | -1.17 | 2.03E-03 | 0.0096 |
| ADGRE2           | -1.17 | 5.06E-03 | 0.0170 |
| LINC01722        | -1.17 | 3.85E-03 | 0.0142 |
| WNT2B            | -1.17 | 1.19E-02 | 0.0304 |
| ENST000002621330 | -1.17 | 5.98E-03 | 0.0190 |
| RPRD2            | -1.17 | 7.48E-03 | 0.0221 |
| SMCR8            | -1.17 | 2.86E-03 | 0.0118 |
| ABHD1            | -1.17 | 2.19E-02 | 0.0468 |
| NEIL1            | -1.17 | 1.76E-02 | 0.0400 |
| ENTPD4           | -1.17 | 1.58E-03 | 0.0083 |
| ENST000003159300 | -1.17 | 1.89E-03 | 0.0092 |
| L3MBTL4          | -1.17 | 6.77E-03 | 0.0206 |
| RFX3             | -1.17 | 7.18E-03 | 0.0214 |
| FBXO15           | -1.17 | 2.18E-03 | 0.0100 |
| EIF4E3           | -1.17 | 9.66E-04 | 0.0063 |
| ANKRD36B         | -1.17 | 1.04E-03 | 0.0066 |
| CACNG8           | -1.17 | 1.13E-02 | 0.0292 |
| ZEB1             | -1.17 | 1.02E-03 | 0.0065 |
| RPS3P2           | -1.17 | 1.50E-02 | 0.0358 |
| SMIM14           | -1.17 | 1.80E-03 | 0.0090 |
| AL137803.1       | -1.17 | 5.85E-03 | 0.0187 |
| ENST000002925300 | -1.17 | 1.82E-02 | 0.0411 |
| GAPLINC          | -1.17 | 4.88E-03 | 0.0166 |
| TSKU             | -1.17 | 8.08E-03 | 0.0232 |
| ZSWIM5           | -1.18 | 6.32E-03 | 0.0196 |
| EPB41            | -1.18 | 1.04E-03 | 0.0066 |
| AC244216.3       | -1.18 | 1.56E-02 | 0.0366 |
| AC245056.4       | -1.18 | 1.56E-02 | 0.0366 |
| AC245056.5       | -1.18 | 1.56E-02 | 0.0366 |
| AC079341.1       | -1.18 | 4.72E-03 | 0.0163 |
| GADL1            | -1.18 | 3.07E-03 | 0.0123 |
| TCTA             | -1.18 | 2.64E-03 | 0.0113 |
| ZBTB40           | -1.18 | 1.26E-03 | 0.0073 |
| AL662907.3       | -1.18 | 1.16E-02 | 0.0297 |
| TMEM116          | -1.18 | 6.08E-03 | 0.0192 |
| ZC3H6            | -1.18 | 6.46E-03 | 0.0199 |
| RN7SL405P        | -1.18 | 1.99E-02 | 0.0437 |
| C2               | -1.18 | 6.87E-03 | 0.0208 |
| ING4             | -1.18 | 4.98E-03 | 0.0168 |
| NKAIN3-IT1       | -1.18 | 1.51E-02 | 0.0358 |

|                  |       |          |        |
|------------------|-------|----------|--------|
| RIN3             | -1.18 | 2.08E-02 | 0.0452 |
| APPL2            | -1.18 | 9.53E-03 | 0.0259 |
| PLS3-AS1         | -1.18 | 1.61E-02 | 0.0376 |
| RUNDC3A-AS1      | -1.18 | 8.85E-03 | 0.0246 |
| CBFA2T2          | -1.18 | 4.23E-03 | 0.0152 |
| AC024451.4       | -1.18 | 6.87E-03 | 0.0208 |
| SLC12A6          | -1.18 | 8.24E-04 | 0.0058 |
| AC013652.1       | -1.18 | 3.13E-03 | 0.0125 |
| MIR193BHG        | -1.18 | 2.02E-02 | 0.0442 |
| AC138904.3       | -1.18 | 9.68E-03 | 0.0262 |
| CLUU1            | -1.19 | 1.06E-02 | 0.0280 |
| CASP1            | -1.19 | 9.32E-04 | 0.0062 |
| MIR29B2CHG       | -1.19 | 6.17E-03 | 0.0194 |
| AC006254.1       | -1.19 | 1.42E-02 | 0.0343 |
| RNU4-2           | -1.19 | 3.36E-03 | 0.0130 |
| KMT2C            | -1.19 | 4.42E-03 | 0.0155 |
| OR10H5           | -1.19 | 9.49E-03 | 0.0259 |
| AC009120.5       | -1.19 | 1.01E-02 | 0.0269 |
| ENST000003322200 | -1.19 | 1.00E-02 | 0.0267 |
| OR6Y1            | -1.19 | 3.79E-03 | 0.0141 |
| ENST000003284030 | -1.19 | 6.86E-03 | 0.0208 |
| EPHB6            | -1.19 | 1.53E-02 | 0.0362 |
| CNN2             | -1.19 | 4.76E-03 | 0.0163 |
| TNFRSF25         | -1.19 | 1.04E-03 | 0.0066 |
| AC010976.1       | -1.19 | 1.54E-02 | 0.0364 |
| VPS13C           | -1.19 | 6.59E-04 | 0.0052 |
| AGO3             | -1.19 | 1.64E-03 | 0.0085 |
| KREMEN1          | -1.19 | 8.56E-03 | 0.0241 |
| AC007998.4       | -1.19 | 2.34E-03 | 0.0105 |
| N4BP2L2          | -1.19 | 1.87E-03 | 0.0092 |
| AL450992.1       | -1.19 | 5.14E-03 | 0.0172 |
| WDR7             | -1.19 | 7.56E-04 | 0.0055 |
| OR5AN1           | -1.19 | 1.08E-02 | 0.0283 |
| AL133243.2       | -1.19 | 2.12E-03 | 0.0099 |
| DLC1             | -1.19 | 7.08E-03 | 0.0212 |
| AL033543.1       | -1.20 | 2.13E-03 | 0.0099 |
| GNB5             | -1.20 | 1.26E-03 | 0.0073 |
| PACS1            | -1.20 | 4.11E-03 | 0.0149 |
| ENST000003208760 | -1.20 | 6.94E-04 | 0.0053 |
| AGPAT4           | -1.20 | 2.08E-02 | 0.0452 |
| AL031772.1       | -1.20 | 5.07E-03 | 0.0170 |
| C8orf31          | -1.20 | 6.80E-03 | 0.0206 |
| PLEKHA8P1        | -1.20 | 4.04E-03 | 0.0147 |
| AC027373.1       | -1.20 | 7.36E-03 | 0.0218 |
| AL604028.2       | -1.20 | 1.17E-02 | 0.0300 |
| ZNF91            | -1.20 | 6.48E-03 | 0.0200 |
| ENST000002361921 | -1.20 | 2.37E-03 | 0.0105 |

|                  |       |          |        |
|------------------|-------|----------|--------|
| TRMT9B           | -1.20 | 1.51E-02 | 0.0359 |
| HELLPAR          | -1.20 | 3.03E-03 | 0.0122 |
| ARNTL            | -1.20 | 1.10E-03 | 0.0068 |
| RASSF8-AS1       | -1.20 | 2.36E-02 | 0.0495 |
| LINC00635        | -1.20 | 5.33E-03 | 0.0176 |
| AC015911.3       | -1.20 | 1.64E-02 | 0.0381 |
| ITGA6-AS1        | -1.20 | 1.64E-02 | 0.0381 |
| IGFL2            | -1.20 | 1.71E-02 | 0.0392 |
| GLIPR2           | -1.20 | 1.51E-03 | 0.0081 |
| GNRHR2           | -1.20 | 3.17E-03 | 0.0126 |
| AP002498.1       | -1.20 | 5.26E-03 | 0.0174 |
| FCHO2            | -1.20 | 9.47E-03 | 0.0258 |
| AC091132.4       | -1.20 | 9.82E-03 | 0.0264 |
| AC243807.3       | -1.20 | 9.82E-03 | 0.0264 |
| CASR             | -1.20 | 7.81E-03 | 0.0227 |
| DOCK9            | -1.20 | 6.96E-04 | 0.0053 |
| ENST000000546660 | -1.20 | 1.21E-03 | 0.0072 |
| PI4KA            | -1.20 | 5.70E-03 | 0.0184 |
| ENST000002531443 | -1.20 | 5.74E-03 | 0.0185 |
| AC008760.1       | -1.21 | 1.44E-02 | 0.0348 |
| TNFSF4           | -1.21 | 8.76E-03 | 0.0245 |
| PSMD6-AS1        | -1.21 | 2.14E-02 | 0.0460 |
| GOLGA8N          | -1.21 | 1.94E-02 | 0.0429 |
| AC104653.1       | -1.21 | 6.63E-03 | 0.0203 |
| AC008040.5       | -1.21 | 1.35E-02 | 0.0331 |
| NAP1L2           | -1.21 | 3.20E-03 | 0.0126 |
| STX17            | -1.21 | 4.66E-03 | 0.0161 |
| AC011477.1       | -1.21 | 9.12E-03 | 0.0252 |
| RDM1P5           | -1.21 | 4.92E-03 | 0.0167 |
| TAS2R31          | -1.21 | 2.31E-02 | 0.0487 |
| Z97192.2         | -1.21 | 8.21E-03 | 0.0234 |
| LRRC74B          | -1.21 | 1.49E-02 | 0.0355 |
| BAIAP2-DT        | -1.21 | 5.94E-03 | 0.0189 |
| RPS4XP5          | -1.21 | 4.55E-03 | 0.0158 |
| ZNF326           | -1.21 | 2.54E-03 | 0.0110 |
| LINS1            | -1.21 | 1.15E-03 | 0.0070 |
| AC090114.3       | -1.21 | 6.15E-03 | 0.0193 |
| IQCM             | -1.21 | 1.12E-02 | 0.0289 |
| BMPR2            | -1.21 | 1.18E-03 | 0.0071 |
| WARS2-IT1        | -1.21 | 8.01E-03 | 0.0231 |
| LINC01278        | -1.21 | 2.85E-03 | 0.0118 |
| OR8G1            | -1.21 | 1.47E-02 | 0.0352 |
| FCRL5            | -1.21 | 2.80E-03 | 0.0116 |
| AC016949.1       | -1.21 | 3.27E-03 | 0.0128 |
| DISP2            | -1.21 | 4.57E-03 | 0.0159 |
| JMY              | -1.22 | 1.73E-03 | 0.0088 |
| SLC25A45         | -1.22 | 2.48E-03 | 0.0109 |

|                  |       |          |        |
|------------------|-------|----------|--------|
| INAVA            | -1.22 | 1.80E-02 | 0.0408 |
| CASC19           | -1.22 | 3.16E-03 | 0.0125 |
| RIPK2            | -1.22 | 2.11E-03 | 0.0098 |
| RABGAP1L         | -1.22 | 1.17E-03 | 0.0070 |
| AC005005.4       | -1.22 | 2.55E-03 | 0.0111 |
| MECP2            | -1.22 | 1.68E-03 | 0.0086 |
| RN7SL321P        | -1.22 | 1.18E-02 | 0.0301 |
| ARF4             | -1.22 | 5.36E-03 | 0.0176 |
| USP53            | -1.22 | 1.35E-02 | 0.0331 |
| TRIM22           | -1.22 | 3.65E-03 | 0.0138 |
| IPO5P1           | -1.22 | 9.37E-03 | 0.0256 |
| DENND4C          | -1.22 | 8.30E-04 | 0.0058 |
| CD47             | -1.22 | 1.21E-03 | 0.0072 |
| LHFPL5           | -1.22 | 8.76E-03 | 0.0245 |
| CDH13            | -1.22 | 1.40E-02 | 0.0340 |
| AL080317.2       | -1.22 | 1.68E-02 | 0.0387 |
| SF3A1            | -1.22 | 1.44E-02 | 0.0348 |
| OR2H2            | -1.22 | 4.27E-03 | 0.0152 |
| SLC43A2          | -1.22 | 1.53E-02 | 0.0361 |
| AC111182.1       | -1.22 | 1.21E-02 | 0.0306 |
| ZNF708           | -1.22 | 1.08E-03 | 0.0067 |
| SPTLC3           | -1.22 | 3.08E-03 | 0.0123 |
| VPS13D           | -1.22 | 1.22E-03 | 0.0072 |
| AC022893.1       | -1.22 | 7.98E-03 | 0.0230 |
| SPSB3            | -1.23 | 1.36E-03 | 0.0076 |
| AC006946.2       | -1.23 | 9.35E-03 | 0.0256 |
| SKI              | -1.23 | 4.46E-03 | 0.0156 |
| EIF2AK3-DT       | -1.23 | 4.46E-03 | 0.0156 |
| STEAP4           | -1.23 | 8.93E-03 | 0.0248 |
| ZDHHC15          | -1.23 | 1.75E-03 | 0.0089 |
| FAM129C          | -1.23 | 3.68E-03 | 0.0138 |
| ACP7             | -1.23 | 1.42E-02 | 0.0345 |
| PIBF1            | -1.23 | 9.82E-03 | 0.0264 |
| SDCBP            | -1.23 | 1.00E-03 | 0.0065 |
| NFYC-AS1         | -1.23 | 5.70E-03 | 0.0184 |
| ENST000003147422 | -1.23 | 1.74E-03 | 0.0088 |
| CASP8            | -1.23 | 8.82E-04 | 0.0060 |
| AL049646.1       | -1.23 | 7.12E-03 | 0.0213 |
| RPS3AP12         | -1.23 | 9.43E-03 | 0.0257 |
| TMC2             | -1.23 | 3.49E-03 | 0.0134 |
| GKAP1            | -1.23 | 5.11E-03 | 0.0171 |
| LCOR             | -1.23 | 2.17E-03 | 0.0100 |
| RNF212           | -1.23 | 1.92E-02 | 0.0426 |
| PHC3             | -1.23 | 1.49E-03 | 0.0081 |
| AC007878.1       | -1.23 | 1.51E-03 | 0.0081 |
| LINC00863        | -1.23 | 4.11E-03 | 0.0149 |
| USP15            | -1.23 | 4.87E-04 | 0.0044 |

|                  |       |          |        |
|------------------|-------|----------|--------|
| ADI1             | -1.23 | 1.50E-03 | 0.0081 |
| BX571818.1       | -1.23 | 6.26E-03 | 0.0195 |
| LINC01359        | -1.24 | 3.33E-03 | 0.0130 |
| ASTN2            | -1.24 | 5.26E-03 | 0.0174 |
| CASK             | -1.24 | 5.59E-03 | 0.0181 |
| GABPB2           | -1.24 | 1.25E-03 | 0.0073 |
| LINC01814        | -1.24 | 2.76E-03 | 0.0116 |
| CDC14B           | -1.24 | 4.76E-03 | 0.0163 |
| AC114956.3       | -1.24 | 2.20E-02 | 0.0470 |
| F2RL3            | -1.24 | 6.23E-03 | 0.0195 |
| KANSL1           | -1.24 | 5.58E-03 | 0.0181 |
| SIDT1            | -1.24 | 1.58E-03 | 0.0083 |
| RAPGEF6          | -1.24 | 5.74E-04 | 0.0048 |
| ENST000003349760 | -1.24 | 5.45E-03 | 0.0178 |
| CELP             | -1.24 | 1.60E-02 | 0.0374 |
| KYNU             | -1.24 | 2.32E-03 | 0.0104 |
| TRAJ36           | -1.24 | 1.60E-02 | 0.0374 |
| PLEKHG5          | -1.24 | 5.78E-03 | 0.0186 |
| KCTD7            | -1.24 | 3.29E-03 | 0.0129 |
| AP000542.2       | -1.24 | 2.65E-03 | 0.0113 |
| KIFC2            | -1.24 | 6.64E-03 | 0.0203 |
| UTS2B            | -1.24 | 1.89E-02 | 0.0421 |
| TMEM191C         | -1.24 | 1.40E-02 | 0.0340 |
| TNRC6A           | -1.24 | 1.66E-03 | 0.0086 |
| SNPH             | -1.24 | 1.36E-02 | 0.0333 |
| AC079193.2       | -1.25 | 6.41E-03 | 0.0198 |
| PTPN13           | -1.25 | 1.17E-03 | 0.0070 |
| AP4S1            | -1.25 | 7.19E-03 | 0.0214 |
| AC092329.4       | -1.25 | 1.83E-03 | 0.0091 |
| DAZAP2           | -1.25 | 6.01E-04 | 0.0049 |
| AC124276.1       | -1.25 | 1.62E-02 | 0.0377 |
| AC006299.1       | -1.25 | 1.63E-02 | 0.0379 |
| ABHD12B          | -1.25 | 8.45E-03 | 0.0239 |
| DCHS2            | -1.25 | 8.80E-03 | 0.0246 |
| ATP5F1AP10       | -1.25 | 8.74E-03 | 0.0245 |
| ELF1             | -1.25 | 6.90E-04 | 0.0053 |
| AC092809.2       | -1.25 | 2.22E-02 | 0.0473 |
| FAM117B          | -1.25 | 1.08E-02 | 0.0283 |
| PIK3CG           | -1.25 | 1.56E-03 | 0.0083 |
| GPLD1            | -1.25 | 3.45E-03 | 0.0132 |
| ARHGAP28         | -1.25 | 3.94E-03 | 0.0144 |
| AKAP7            | -1.25 | 1.85E-03 | 0.0091 |
| SYT12            | -1.25 | 9.38E-03 | 0.0256 |
| ENST000003273071 | -1.25 | 1.50E-02 | 0.0356 |
| SNORD11          | -1.25 | 1.12E-02 | 0.0290 |
| ENST000002993550 | -1.25 | 1.04E-02 | 0.0275 |
| AC119044.1       | -1.25 | 1.83E-02 | 0.0413 |

|                  |       |          |        |
|------------------|-------|----------|--------|
| ABCA9            | -1.25 | 3.82E-03 | 0.0141 |
| SMG6             | -1.25 | 1.10E-02 | 0.0287 |
| ENST000002530542 | -1.25 | 3.08E-03 | 0.0123 |
| GALT             | -1.25 | 1.08E-03 | 0.0067 |
| AC036214.2       | -1.25 | 2.20E-03 | 0.0101 |
| DOCK2            | -1.25 | 4.11E-03 | 0.0149 |
| SH3GL1P1         | -1.26 | 9.91E-03 | 0.0266 |
| AC104118.1       | -1.26 | 5.05E-03 | 0.0170 |
| AC009318.3       | -1.26 | 8.99E-03 | 0.0249 |
| RNF125           | -1.26 | 1.14E-02 | 0.0293 |
| ZNF705E          | -1.26 | 9.87E-03 | 0.0265 |
| IREB2            | -1.26 | 1.50E-03 | 0.0081 |
| AL021368.2       | -1.26 | 2.92E-03 | 0.0120 |
| AC005832.1       | -1.26 | 1.15E-02 | 0.0296 |
| FOXP1            | -1.26 | 1.17E-03 | 0.0070 |
| ERN1             | -1.26 | 3.30E-03 | 0.0129 |
| HOMER3           | -1.26 | 2.04E-02 | 0.0445 |
| YAP1             | -1.26 | 1.20E-02 | 0.0304 |
| AL592437.2       | -1.26 | 1.53E-02 | 0.0362 |
| AL592148.3       | -1.26 | 3.27E-03 | 0.0128 |
| AC005776.2       | -1.26 | 5.61E-03 | 0.0182 |
| ENST000003013991 | -1.26 | 1.87E-02 | 0.0418 |
| LINC01002        | -1.26 | 1.83E-03 | 0.0091 |
| FAM185BP         | -1.26 | 6.42E-03 | 0.0198 |
| RNU6-1016P       | -1.26 | 3.17E-03 | 0.0126 |
| AL645568.1       | -1.26 | 6.13E-03 | 0.0193 |
| APBB1P           | -1.26 | 1.37E-02 | 0.0335 |
| KIAA1328         | -1.26 | 8.59E-04 | 0.0059 |
| AC068620.3       | -1.26 | 7.96E-03 | 0.0230 |
| XKR9             | -1.26 | 6.87E-03 | 0.0208 |
| RELCH            | -1.26 | 7.27E-04 | 0.0055 |
| LIFR-AS1         | -1.26 | 1.25E-02 | 0.0314 |
| AC044810.9       | -1.26 | 4.65E-03 | 0.0161 |
| ZNRF2            | -1.26 | 9.44E-04 | 0.0063 |
| EMP2             | -1.26 | 8.57E-03 | 0.0241 |
| ENST000002620962 | -1.26 | 2.86E-03 | 0.0118 |
| OPRM1            | -1.27 | 6.24E-03 | 0.0195 |
| MAP3K3           | -1.27 | 1.04E-03 | 0.0066 |
| OR5H1            | -1.27 | 1.92E-02 | 0.0427 |
| MPV17L           | -1.27 | 6.25E-03 | 0.0195 |
| ENST000003082341 | -1.27 | 4.36E-03 | 0.0154 |
| LINC01562        | -1.27 | 1.70E-03 | 0.0087 |
| ZNF235           | -1.27 | 1.53E-03 | 0.0082 |
| RF00017.127      | -1.27 | 1.30E-02 | 0.0323 |
| RPL21P135        | -1.27 | 1.30E-02 | 0.0323 |
| MAP3K4           | -1.27 | 1.89E-03 | 0.0093 |
| NEDD4L           | -1.27 | 3.55E-03 | 0.0135 |



|                  |       |          |        |
|------------------|-------|----------|--------|
| ZBTB4            | -1.27 | 4.42E-03 | 0.0155 |
| PHF12            | -1.27 | 2.34E-03 | 0.0105 |
| OR2V2            | -1.27 | 1.20E-02 | 0.0304 |
| AC073332.1       | -1.27 | 1.42E-02 | 0.0344 |
| AL157838.1       | -1.27 | 1.85E-02 | 0.0416 |
| TPH1             | -1.27 | 1.11E-02 | 0.0288 |
| Z93930.3         | -1.27 | 2.33E-02 | 0.0490 |
| ENST000003707100 | -1.27 | 9.04E-03 | 0.0250 |
| CCDC84           | -1.27 | 1.43E-03 | 0.0079 |
| RNPC3            | -1.27 | 1.37E-03 | 0.0077 |
| Z95114.1         | -1.27 | 2.02E-03 | 0.0096 |
| SBK1             | -1.27 | 1.78E-02 | 0.0404 |
| ENST000002160191 | -1.27 | 2.88E-03 | 0.0118 |
| AC124804.1       | -1.27 | 2.15E-02 | 0.0463 |
| PARP4            | -1.27 | 5.11E-04 | 0.0045 |
| CD69             | -1.28 | 8.30E-04 | 0.0058 |
| ABCC2            | -1.28 | 3.43E-03 | 0.0132 |
| IQCF3            | -1.28 | 6.01E-03 | 0.0190 |
| ATG16L1          | -1.28 | 1.46E-03 | 0.0080 |
| ENST000002778170 | -1.28 | 1.47E-02 | 0.0352 |
| CYLD             | -1.28 | 8.14E-04 | 0.0057 |
| AC018809.2       | -1.28 | 6.20E-03 | 0.0194 |
| AC037459.3       | -1.28 | 2.34E-02 | 0.0491 |
| RDH16            | -1.28 | 4.80E-03 | 0.0164 |
| BORCS7           | -1.28 | 9.33E-03 | 0.0256 |
| AC011379.1       | -1.28 | 1.10E-02 | 0.0286 |
| VPS26A           | -1.28 | 8.76E-03 | 0.0245 |
| NUDT16P1         | -1.28 | 1.12E-02 | 0.0291 |
| LEKR1            | -1.28 | 4.42E-03 | 0.0155 |
| AC078906.1       | -1.28 | 1.88E-02 | 0.0420 |
| LINC02473        | -1.28 | 6.83E-03 | 0.0207 |
| AP000911.1       | -1.28 | 1.73E-02 | 0.0395 |
| ZMYND11          | -1.28 | 6.10E-03 | 0.0192 |
| SGSM2            | -1.28 | 1.33E-03 | 0.0075 |
| AC008115.4       | -1.28 | 4.76E-03 | 0.0163 |
| ENST000003300221 | -1.28 | 1.35E-02 | 0.0331 |
| LINC00342        | -1.28 | 7.51E-04 | 0.0055 |
| AC012368.2       | -1.28 | 1.08E-02 | 0.0283 |
| PTEN             | -1.28 | 6.17E-04 | 0.0050 |
| AC092431.2       | -1.28 | 1.36E-02 | 0.0333 |
| BRWD1            | -1.29 | 6.37E-04 | 0.0051 |
| CEP85L           | -1.29 | 5.75E-04 | 0.0048 |
| NUTM2B-AS1       | -1.29 | 1.80E-03 | 0.0090 |
| FP325330.3       | -1.29 | 6.85E-03 | 0.0208 |
| ANKRD44-IT1      | -1.29 | 5.19E-03 | 0.0173 |
| CDKL5            | -1.29 | 3.58E-03 | 0.0136 |
| SNORD11B         | -1.29 | 3.08E-03 | 0.0123 |

|                  |       |          |        |
|------------------|-------|----------|--------|
| TTC14            | -1.29 | 1.43E-03 | 0.0079 |
| UNC80            | -1.29 | 2.18E-03 | 0.0100 |
| GRAP             | -1.29 | 1.07E-03 | 0.0067 |
| CATSPERG         | -1.29 | 6.56E-03 | 0.0201 |
| SMAD3            | -1.29 | 9.54E-03 | 0.0260 |
| PCAT14           | -1.29 | 2.97E-03 | 0.0121 |
| AMOT             | -1.29 | 3.61E-03 | 0.0137 |
| LINC01016        | -1.29 | 7.52E-03 | 0.0221 |
| RNF149           | -1.29 | 1.19E-03 | 0.0071 |
| C8orf34-AS1      | -1.29 | 3.76E-03 | 0.0140 |
| LDHAL6CP         | -1.29 | 8.51E-03 | 0.0240 |
| LINC00882        | -1.29 | 7.20E-03 | 0.0214 |
| PARP12           | -1.29 | 3.93E-03 | 0.0144 |
| LINC01684        | -1.29 | 1.36E-03 | 0.0076 |
| SCD5             | -1.29 | 2.57E-03 | 0.0111 |
| ALS2CR12         | -1.29 | 1.12E-02 | 0.0290 |
| AC073073.2       | -1.29 | 2.98E-03 | 0.0121 |
| AC003681.1       | -1.29 | 1.19E-02 | 0.0304 |
| AP001486.2       | -1.29 | 1.20E-03 | 0.0071 |
| TBCC             | -1.29 | 7.36E-04 | 0.0055 |
| ZNF528           | -1.29 | 9.65E-04 | 0.0063 |
| PRAM1            | -1.29 | 1.77E-02 | 0.0403 |
| CACNB4           | -1.29 | 2.04E-02 | 0.0445 |
| TMEM232          | -1.30 | 1.62E-02 | 0.0377 |
| CHIC2            | -1.30 | 2.56E-03 | 0.0111 |
| AC040169.3       | -1.30 | 6.04E-03 | 0.0191 |
| CNNM2            | -1.30 | 2.92E-03 | 0.0119 |
| CTSS             | -1.30 | 5.34E-04 | 0.0046 |
| CD36             | -1.30 | 1.51E-02 | 0.0359 |
| CYSLTR2          | -1.30 | 6.50E-03 | 0.0200 |
| ZNF662           | -1.30 | 3.49E-03 | 0.0133 |
| AL136379.1       | -1.30 | 1.23E-02 | 0.0311 |
| BORCS5           | -1.30 | 2.83E-03 | 0.0117 |
| VDAC1P8          | -1.30 | 4.26E-03 | 0.0152 |
| ENST000003100150 | -1.30 | 6.87E-04 | 0.0053 |
| CTSK             | -1.30 | 1.45E-02 | 0.0349 |
| HNRNPA1P54       | -1.30 | 2.16E-03 | 0.0099 |
| AL133342.1       | -1.30 | 1.18E-02 | 0.0301 |
| CECR7            | -1.30 | 2.02E-02 | 0.0442 |
| TPRG1L           | -1.30 | 4.77E-03 | 0.0164 |
| DGKA             | -1.30 | 1.68E-03 | 0.0086 |
| AC127070.2       | -1.30 | 3.90E-03 | 0.0143 |
| CCDC30           | -1.30 | 4.41E-03 | 0.0155 |
| AL133387.2       | -1.30 | 1.50E-02 | 0.0357 |
| OR2M3            | -1.30 | 3.34E-03 | 0.0130 |
| ENST000003290821 | -1.30 | 4.85E-03 | 0.0165 |
| CD6              | -1.30 | 7.79E-04 | 0.0056 |

|                  |       |          |        |
|------------------|-------|----------|--------|
| SLC1A6           | -1.30 | 3.54E-03 | 0.0135 |
| AL031595.2       | -1.31 | 7.82E-03 | 0.0227 |
| ENST00000641104  | -1.31 | 1.96E-02 | 0.0433 |
| LINC00667        | -1.31 | 7.66E-03 | 0.0224 |
| HERC1            | -1.31 | 7.97E-04 | 0.0057 |
| UBE2Q2P1         | -1.31 | 1.26E-02 | 0.0316 |
| VWA5B1           | -1.31 | 1.56E-02 | 0.0366 |
| AC008870.2       | -1.31 | 1.09E-02 | 0.0285 |
| ENST000002532701 | -1.31 | 1.16E-03 | 0.0070 |
| AL137025.1       | -1.31 | 1.70E-02 | 0.0391 |
| AC016907.2       | -1.31 | 9.10E-03 | 0.0252 |
| WASHC3           | -1.31 | 9.87E-04 | 0.0064 |
| AC090181.2       | -1.31 | 1.29E-02 | 0.0322 |
| SELPLG           | -1.31 | 5.13E-03 | 0.0171 |
| AC011475.1       | -1.31 | 1.55E-02 | 0.0366 |
| LINC00547        | -1.31 | 1.25E-02 | 0.0314 |
| AL021707.2       | -1.31 | 2.22E-02 | 0.0473 |
| GRAP2            | -1.31 | 7.82E-04 | 0.0056 |
| ENST000002982742 | -1.31 | 5.50E-03 | 0.0179 |
| IL10RA           | -1.31 | 1.23E-03 | 0.0073 |
| LINC00346        | -1.31 | 1.33E-03 | 0.0075 |
| CRTC3            | -1.31 | 8.60E-03 | 0.0242 |
| ENST000003177750 | -1.31 | 9.48E-03 | 0.0258 |
| AL627309.1       | -1.31 | 5.98E-03 | 0.0190 |
| AC121320.1       | -1.31 | 1.65E-02 | 0.0383 |
| AC024075.2       | -1.31 | 3.20E-03 | 0.0126 |
| AP001178.3       | -1.31 | 6.39E-03 | 0.0198 |
| ZNF891           | -1.31 | 1.89E-03 | 0.0092 |
| ADAM32           | -1.31 | 3.01E-03 | 0.0122 |
| TNRC6B           | -1.31 | 1.42E-03 | 0.0079 |
| ICOSLG           | -1.32 | 1.03E-02 | 0.0273 |
| SLC35F6          | -1.32 | 2.80E-03 | 0.0116 |
| NSMCE3           | -1.32 | 8.29E-04 | 0.0058 |
| AC244669.1       | -1.32 | 5.86E-03 | 0.0187 |
| AC243922.3       | -1.32 | 1.12E-03 | 0.0068 |
| KLHL32           | -1.32 | 3.37E-03 | 0.0131 |
| HLA-DQA1         | -1.32 | 9.14E-04 | 0.0061 |
| RNA5SP281        | -1.32 | 1.86E-02 | 0.0417 |
| ZNF556           | -1.32 | 2.76E-03 | 0.0116 |
| RALGAPA1         | -1.32 | 5.22E-04 | 0.0045 |
| SEC14L2          | -1.32 | 1.25E-02 | 0.0313 |
| AL022344.1       | -1.32 | 1.14E-02 | 0.0293 |
| RPS29P21         | -1.32 | 2.28E-02 | 0.0482 |
| BTN3A3           | -1.32 | 7.44E-04 | 0.0055 |
| TRIM73           | -1.32 | 8.40E-03 | 0.0238 |
| CRY2             | -1.32 | 1.76E-03 | 0.0089 |
| AC126768.3       | -1.32 | 5.46E-03 | 0.0179 |

|                  |       |          |        |
|------------------|-------|----------|--------|
| RN7SL615P        | -1.32 | 1.76E-02 | 0.0400 |
| AC007038.1       | -1.32 | 6.59E-03 | 0.0202 |
| DHRS12           | -1.32 | 2.66E-03 | 0.0113 |
| AC006141.1       | -1.32 | 1.60E-03 | 0.0084 |
| AC007390.2       | -1.32 | 2.12E-03 | 0.0098 |
| AC244517.1       | -1.32 | 2.24E-02 | 0.0476 |
| ENST000002804670 | -1.32 | 2.97E-03 | 0.0121 |
| ZNF517           | -1.32 | 1.09E-02 | 0.0285 |
| PLIN5            | -1.32 | 7.89E-03 | 0.0228 |
| AC133473.1       | -1.32 | 2.08E-02 | 0.0451 |
| MT-RNR2          | -1.32 | 1.28E-02 | 0.0319 |
| SCHIP1           | -1.32 | 2.71E-03 | 0.0115 |
| PRDM2            | -1.32 | 5.22E-04 | 0.0045 |
| AC087752.4       | -1.33 | 2.00E-02 | 0.0440 |
| CYP4A22-AS1      | -1.33 | 1.53E-03 | 0.0082 |
| LINC01091        | -1.33 | 1.09E-02 | 0.0284 |
| GAB3             | -1.33 | 1.03E-03 | 0.0066 |
| PNPLA5           | -1.33 | 1.68E-02 | 0.0387 |
| GPR155           | -1.33 | 5.07E-04 | 0.0045 |
| LINC00670        | -1.33 | 3.54E-03 | 0.0135 |
| ZNF471           | -1.33 | 1.22E-03 | 0.0072 |
| ENST000002503771 | -1.33 | 1.13E-03 | 0.0069 |
| HEXD-IT1         | -1.33 | 4.40E-03 | 0.0155 |
| ENST000003352510 | -1.33 | 1.55E-03 | 0.0083 |
| C1orf158         | -1.33 | 1.57E-02 | 0.0370 |
| KLRD1            | -1.33 | 3.43E-03 | 0.0132 |
| AC096644.4       | -1.33 | 7.68E-03 | 0.0224 |
| AC011476.3       | -1.33 | 1.07E-02 | 0.0282 |
| ITFG2            | -1.33 | 7.45E-04 | 0.0055 |
| AC092279.1       | -1.33 | 2.31E-03 | 0.0104 |
| AC009318.2       | -1.33 | 5.36E-03 | 0.0176 |
| AC009961.1       | -1.33 | 1.88E-03 | 0.0092 |
| OLMALINC         | -1.33 | 1.01E-03 | 0.0065 |
| AC087894.1       | -1.33 | 1.59E-03 | 0.0084 |
| CDC42SE1         | -1.33 | 7.80E-04 | 0.0056 |
| MRNIP            | -1.33 | 1.40E-03 | 0.0078 |
| KCNE1            | -1.33 | 1.53E-02 | 0.0361 |
| AL354892.3       | -1.33 | 1.25E-02 | 0.0313 |
| AL354892.6       | -1.33 | 1.25E-02 | 0.0313 |
| ACSM2B           | -1.33 | 4.18E-03 | 0.0150 |
| RF00017.100      | -1.33 | 2.24E-02 | 0.0476 |
| OR10H1           | -1.33 | 1.58E-02 | 0.0370 |
| ZNF548           | -1.33 | 2.74E-03 | 0.0115 |
| AL031430.1       | -1.33 | 2.24E-02 | 0.0476 |
| NSUN5P1          | -1.33 | 2.43E-03 | 0.0107 |
| NEGR1            | -1.33 | 3.14E-03 | 0.0125 |
| C5orf64          | -1.33 | 5.60E-03 | 0.0182 |

|                  |       |          |        |
|------------------|-------|----------|--------|
| LINC02447        | -1.33 | 8.59E-03 | 0.0242 |
| MEF2D            | -1.33 | 1.91E-02 | 0.0426 |
| AL136985.3       | -1.33 | 1.19E-02 | 0.0303 |
| HERC3            | -1.33 | 1.60E-03 | 0.0084 |
| AL355816.2       | -1.34 | 5.31E-03 | 0.0175 |
| VIM-AS1          | -1.34 | 1.50E-03 | 0.0081 |
| AC007881.3       | -1.34 | 1.88E-02 | 0.0420 |
| CD44             | -1.34 | 2.28E-03 | 0.0103 |
| TRIM3            | -1.34 | 3.96E-03 | 0.0145 |
| AL352979.2       | -1.34 | 6.93E-03 | 0.0209 |
| ANKAR            | -1.34 | 1.24E-03 | 0.0073 |
| AC244216.4       | -1.34 | 2.00E-02 | 0.0439 |
| AC244216.5       | -1.34 | 2.00E-02 | 0.0439 |
| AC245034.1       | -1.34 | 2.00E-02 | 0.0439 |
| AC097461.1       | -1.34 | 2.13E-03 | 0.0099 |
| VPS13B           | -1.34 | 3.55E-04 | 0.0038 |
| KCNJ5            | -1.34 | 5.52E-03 | 0.0180 |
| PCDHB16          | -1.34 | 1.46E-02 | 0.0351 |
| OR7D2            | -1.34 | 7.49E-03 | 0.0221 |
| WDR81            | -1.34 | 1.06E-03 | 0.0066 |
| SNORD10          | -1.34 | 3.76E-03 | 0.0140 |
| WISP2            | -1.34 | 1.65E-02 | 0.0382 |
| SENP7            | -1.34 | 5.97E-04 | 0.0049 |
| ZBTB37           | -1.34 | 1.00E-03 | 0.0065 |
| SESN1            | -1.34 | 8.05E-04 | 0.0057 |
| GALR1            | -1.34 | 6.96E-03 | 0.0210 |
| TMOD2            | -1.34 | 2.60E-03 | 0.0112 |
| HRAT17           | -1.34 | 3.31E-03 | 0.0129 |
| SCN1A            | -1.34 | 9.74E-03 | 0.0263 |
| BCL2L11          | -1.34 | 1.99E-02 | 0.0438 |
| HS3ST3B1         | -1.34 | 1.76E-03 | 0.0089 |
| AC135050.6       | -1.34 | 1.87E-03 | 0.0092 |
| AL122035.2       | -1.35 | 3.39E-03 | 0.0131 |
| SYTL4            | -1.35 | 8.03E-03 | 0.0231 |
| AC103957.1       | -1.35 | 3.06E-03 | 0.0123 |
| ASAP3            | -1.35 | 1.15E-02 | 0.0295 |
| C8orf49          | -1.35 | 7.06E-03 | 0.0212 |
| TSPAN15          | -1.35 | 1.31E-02 | 0.0324 |
| EFCAB10          | -1.35 | 1.13E-02 | 0.0293 |
| GLCCI1           | -1.35 | 2.88E-03 | 0.0118 |
| ENST000003400960 | -1.35 | 1.92E-03 | 0.0093 |
| AC239809.3       | -1.35 | 6.63E-03 | 0.0203 |
| AL596325.2       | -1.35 | 1.42E-02 | 0.0344 |
| AC010148.1       | -1.35 | 4.30E-03 | 0.0153 |
| AL138820.1       | -1.35 | 2.12E-03 | 0.0099 |
| ZNF211           | -1.35 | 1.54E-03 | 0.0082 |
| CHP2             | -1.35 | 2.03E-03 | 0.0096 |

|                  |       |          |        |
|------------------|-------|----------|--------|
| SSH2             | -1.35 | 3.30E-03 | 0.0129 |
| ENST000003361281 | -1.35 | 2.32E-03 | 0.0104 |
| SNORA7B          | -1.36 | 1.02E-02 | 0.0271 |
| TMEM45A          | -1.36 | 3.98E-03 | 0.0145 |
| AC093520.1       | -1.36 | 1.08E-02 | 0.0284 |
| OR56A1           | -1.36 | 5.89E-03 | 0.0188 |
| GPR52            | -1.36 | 1.24E-02 | 0.0311 |
| AL513548.3       | -1.36 | 1.63E-02 | 0.0378 |
| RN7SL582P        | -1.36 | 1.63E-02 | 0.0378 |
| ABHD13           | -1.36 | 5.71E-04 | 0.0048 |
| C12orf50         | -1.36 | 3.34E-03 | 0.0130 |
| MAP3K5           | -1.36 | 4.75E-04 | 0.0044 |
| ENST000002694450 | -1.36 | 1.78E-03 | 0.0089 |
| FXYD5            | -1.36 | 3.74E-03 | 0.0140 |
| SPINK9           | -1.36 | 3.35E-03 | 0.0130 |
| NPIP9            | -1.36 | 2.38E-03 | 0.0106 |
| AC011978.2       | -1.36 | 1.05E-02 | 0.0277 |
| FAM117A          | -1.36 | 1.48E-03 | 0.0080 |
| SNAI3            | -1.36 | 4.19E-03 | 0.0150 |
| CORO7            | -1.36 | 1.20E-03 | 0.0071 |
| TSPYL2           | -1.36 | 4.04E-04 | 0.0040 |
| CBX3P2           | -1.36 | 1.93E-03 | 0.0094 |
| AL035555.1       | -1.36 | 3.88E-03 | 0.0143 |
| OR10K1           | -1.36 | 4.38E-03 | 0.0155 |
| CFAP97D1         | -1.36 | 5.93E-03 | 0.0189 |
| RNU6-97P         | -1.36 | 2.24E-02 | 0.0476 |
| AC007099.1       | -1.37 | 1.30E-02 | 0.0323 |
| POU6F1           | -1.37 | 9.23E-03 | 0.0254 |
| KIAA2026         | -1.37 | 3.90E-04 | 0.0040 |
| OR7C1            | -1.37 | 2.02E-03 | 0.0096 |
| AL354718.1       | -1.37 | 1.19E-02 | 0.0303 |
| MIPOL1           | -1.37 | 6.68E-04 | 0.0052 |
| AC107918.4       | -1.37 | 9.13E-03 | 0.0252 |
| NBPF15           | -1.37 | 4.92E-04 | 0.0044 |
| ADCY2            | -1.37 | 6.14E-03 | 0.0193 |
| AC098936.1       | -1.37 | 1.51E-02 | 0.0359 |
| COLCA1           | -1.37 | 1.84E-02 | 0.0414 |
| C2orf15          | -1.37 | 6.19E-03 | 0.0194 |
| LINC01843        | -1.37 | 1.81E-02 | 0.0410 |
| LRP1             | -1.37 | 2.37E-02 | 0.0496 |
| TRBV12-4         | -1.37 | 1.99E-03 | 0.0095 |
| DNASE1L3         | -1.37 | 1.90E-02 | 0.0423 |
| ENST000003193630 | -1.37 | 9.85E-03 | 0.0265 |
| XPC              | -1.37 | 7.36E-03 | 0.0218 |
| TXLNGY           | -1.37 | 3.35E-04 | 0.0037 |
| CERS6-AS1        | -1.37 | 1.78E-02 | 0.0404 |
| ENST000003022190 | -1.37 | 1.12E-02 | 0.0290 |

|                  |       |          |        |
|------------------|-------|----------|--------|
| PITPNC1          | -1.37 | 5.39E-04 | 0.0046 |
| MCF2L2           | -1.37 | 1.22E-03 | 0.0072 |
| ATAD2B           | -1.37 | 3.85E-04 | 0.0039 |
| SIPA1L3          | -1.37 | 2.05E-02 | 0.0446 |
| AC139718.2       | -1.38 | 1.83E-02 | 0.0413 |
| ENST000003234921 | -1.38 | 7.05E-04 | 0.0054 |
| AC019117.1       | -1.38 | 7.87E-03 | 0.0228 |
| SELL             | -1.38 | 6.01E-03 | 0.0190 |
| NEK11            | -1.38 | 2.80E-03 | 0.0116 |
| ZIM2-AS1         | -1.38 | 2.24E-02 | 0.0476 |
| GUSBP11          | -1.38 | 5.16E-03 | 0.0172 |
| AC008026.3       | -1.38 | 7.33E-03 | 0.0217 |
| AC093426.1       | -1.38 | 1.44E-02 | 0.0347 |
| NBPF1            | -1.38 | 7.98E-04 | 0.0057 |
| SNORA53          | -1.38 | 6.49E-04 | 0.0051 |
| PLEKHG3          | -1.38 | 2.88E-03 | 0.0118 |
| AL356317.1       | -1.38 | 3.64E-03 | 0.0137 |
| AC010913.1       | -1.38 | 4.21E-03 | 0.0151 |
| LINC02551        | -1.38 | 4.83E-03 | 0.0165 |
| RF00017.8        | -1.38 | 7.89E-03 | 0.0228 |
| OR7A17           | -1.38 | 9.63E-03 | 0.0261 |
| AC009502.1       | -1.38 | 3.10E-03 | 0.0124 |
| AC079610.1       | -1.38 | 2.71E-03 | 0.0114 |
| AL450345.1       | -1.38 | 8.25E-03 | 0.0235 |
| TADA2B           | -1.38 | 9.13E-04 | 0.0061 |
| AC126763.1       | -1.38 | 2.16E-02 | 0.0464 |
| ENST000002562550 | -1.38 | 1.17E-03 | 0.0070 |
| ENST000002026771 | -1.38 | 7.55E-03 | 0.0222 |
| AJ009632.2       | -1.38 | 3.27E-03 | 0.0128 |
| SFTPD-AS1        | -1.38 | 7.50E-03 | 0.0221 |
| ENST000003219451 | -1.38 | 2.16E-03 | 0.0099 |
| PRKY             | -1.38 | 3.42E-03 | 0.0132 |
| AC008609.1       | -1.38 | 1.25E-02 | 0.0313 |
| AL008638.6       | -1.39 | 6.21E-03 | 0.0194 |
| AP000542.3       | -1.39 | 4.79E-03 | 0.0164 |
| MIR573           | -1.39 | 4.17E-03 | 0.0150 |
| ENST000003369760 | -1.39 | 7.17E-04 | 0.0054 |
| ENST000003183080 | -1.39 | 1.16E-02 | 0.0298 |
| IKBKE            | -1.39 | 2.20E-03 | 0.0101 |
| TTC39C           | -1.39 | 3.64E-03 | 0.0137 |
| AL122125.1       | -1.39 | 1.35E-02 | 0.0332 |
| LRP2BP           | -1.39 | 3.31E-03 | 0.0129 |
| OR5H14           | -1.39 | 6.25E-03 | 0.0195 |
| CCDC80           | -1.39 | 3.50E-03 | 0.0134 |
| FLJ31104         | -1.39 | 6.41E-03 | 0.0198 |
| CREBBP           | -1.39 | 2.27E-03 | 0.0103 |
| AC245100.4       | -1.39 | 7.04E-03 | 0.0211 |

|                  |       |          |        |
|------------------|-------|----------|--------|
| ENST00000550837  | -1.39 | 4.51E-03 | 0.0157 |
| PCMTD1           | -1.39 | 6.05E-04 | 0.0049 |
| RF00139.3        | -1.39 | 5.67E-03 | 0.0183 |
| SNX18            | -1.39 | 2.14E-03 | 0.0099 |
| LRRC8C-DT        | -1.39 | 2.67E-03 | 0.0113 |
| ACPP             | -1.39 | 7.83E-03 | 0.0227 |
| PVRIG            | -1.39 | 4.56E-03 | 0.0159 |
| SUN2             | -1.39 | 3.80E-04 | 0.0039 |
| CYP3A5           | -1.40 | 5.10E-03 | 0.0171 |
| AC026124.2       | -1.40 | 1.98E-03 | 0.0095 |
| AC027097.2       | -1.40 | 2.36E-03 | 0.0105 |
| CFAP221          | -1.40 | 1.37E-02 | 0.0336 |
| HDAC4            | -1.40 | 4.88E-03 | 0.0166 |
| BCL9L            | -1.40 | 1.70E-02 | 0.0391 |
| ENST000002482110 | -1.40 | 2.88E-03 | 0.0118 |
| TEX12            | -1.40 | 2.17E-02 | 0.0466 |
| RNF166           | -1.40 | 9.35E-04 | 0.0062 |
| PAN3             | -1.40 | 7.41E-04 | 0.0055 |
| AL121944.1       | -1.40 | 1.28E-02 | 0.0319 |
| AP003119.3       | -1.40 | 1.52E-02 | 0.0361 |
| AC084824.3       | -1.40 | 2.39E-02 | 0.0499 |
| ENST000003006824 | -1.40 | 1.60E-03 | 0.0084 |
| TRBV11-2         | -1.40 | 1.93E-02 | 0.0428 |
| LINC01762        | -1.40 | 6.67E-03 | 0.0204 |
| NPTXR            | -1.40 | 2.24E-02 | 0.0476 |
| LINC01933        | -1.40 | 7.02E-03 | 0.0211 |
| AC021660.3       | -1.40 | 1.45E-02 | 0.0349 |
| CHRM3-AS2        | -1.40 | 1.22E-02 | 0.0308 |
| SLFN5            | -1.40 | 3.11E-03 | 0.0124 |
| CHRM5            | -1.40 | 1.31E-02 | 0.0324 |
| AC010168.2       | -1.40 | 6.51E-04 | 0.0051 |
| AC025539.1       | -1.40 | 9.75E-04 | 0.0064 |
| ENST000003412490 | -1.40 | 2.11E-02 | 0.0456 |
| AC007686.3       | -1.40 | 6.56E-03 | 0.0201 |
| LINC01473        | -1.40 | 4.69E-03 | 0.0162 |
| AL132657.1       | -1.40 | 2.22E-02 | 0.0473 |
| CYP46A1          | -1.40 | 7.97E-04 | 0.0057 |
| ENST000003898570 | -1.41 | 5.57E-04 | 0.0047 |
| AC020978.7       | -1.41 | 3.80E-03 | 0.0141 |
| SH3BP5           | -1.41 | 1.02E-02 | 0.0272 |
| C16orf54         | -1.41 | 1.28E-03 | 0.0074 |
| ENST000002925791 | -1.41 | 8.31E-04 | 0.0058 |
| CD44-AS1         | -1.41 | 1.34E-02 | 0.0329 |
| LIX1L-AS1        | -1.41 | 8.97E-03 | 0.0249 |
| DDX5             | -1.41 | 1.39E-03 | 0.0078 |
| LINC00511        | -1.41 | 2.69E-03 | 0.0114 |
| TRBV14           | -1.41 | 4.82E-03 | 0.0165 |



|                  |       |          |        |
|------------------|-------|----------|--------|
| AC130895.1       | -1.41 | 1.27E-02 | 0.0317 |
| AC108108.1       | -1.41 | 2.02E-03 | 0.0096 |
| PLEKHM1          | -1.41 | 4.36E-03 | 0.0154 |
| LINC02334        | -1.41 | 1.58E-03 | 0.0083 |
| LINC00276        | -1.41 | 4.57E-03 | 0.0159 |
| Z98885.3         | -1.41 | 1.43E-02 | 0.0345 |
| ENST000003126350 | -1.41 | 2.35E-03 | 0.0105 |
| MGAT4A           | -1.41 | 2.46E-04 | 0.0032 |
| TMC6             | -1.41 | 4.20E-04 | 0.0041 |
| OR5A1            | -1.41 | 1.88E-03 | 0.0092 |
| LMBR1L           | -1.41 | 3.94E-03 | 0.0144 |
| LINC00672        | -1.41 | 3.82E-03 | 0.0141 |
| RANBP17          | -1.41 | 6.33E-03 | 0.0196 |
| SDHAP3           | -1.41 | 1.83E-02 | 0.0413 |
| ACSS1            | -1.41 | 8.61E-04 | 0.0059 |
| SNORD94          | -1.41 | 1.88E-02 | 0.0419 |
| WWP1             | -1.41 | 5.39E-04 | 0.0046 |
| TMEM105          | -1.42 | 2.14E-02 | 0.0460 |
| AP000347.2       | -1.42 | 1.53E-03 | 0.0082 |
| CCDC17           | -1.42 | 1.30E-02 | 0.0323 |
| FAM228B          | -1.42 | 5.95E-04 | 0.0049 |
| CFAP206          | -1.42 | 1.76E-02 | 0.0401 |
| ABCA10           | -1.42 | 1.98E-03 | 0.0095 |
| ANO9             | -1.42 | 5.76E-04 | 0.0048 |
| ZNF252P-AS1      | -1.42 | 1.58E-02 | 0.0371 |
| HEXD             | -1.42 | 7.80E-03 | 0.0227 |
| ZC3H15           | -1.42 | 6.39E-04 | 0.0051 |
| TSPAN14          | -1.42 | 8.62E-03 | 0.0242 |
| LINC00506        | -1.42 | 2.83E-03 | 0.0117 |
| ENST00000623130  | -1.42 | 9.78E-04 | 0.0064 |
| PDE6A            | -1.42 | 6.03E-03 | 0.0191 |
| AC025187.1       | -1.42 | 1.46E-02 | 0.0351 |
| TAGAP            | -1.42 | 1.74E-03 | 0.0088 |
| SGTB             | -1.42 | 4.96E-04 | 0.0044 |
| AC108718.1       | -1.42 | 9.88E-03 | 0.0265 |
| SVIL             | -1.42 | 6.44E-04 | 0.0051 |
| MPPED2           | -1.42 | 9.71E-03 | 0.0262 |
| ZNF844           | -1.42 | 3.22E-03 | 0.0127 |
| AC015849.5       | -1.42 | 8.03E-03 | 0.0231 |
| AC015849.9       | -1.42 | 8.03E-03 | 0.0231 |
| RAD21-AS1        | -1.42 | 1.71E-03 | 0.0087 |
| AL137782.1       | -1.42 | 5.26E-03 | 0.0174 |
| AC005670.2       | -1.42 | 1.76E-02 | 0.0400 |
| AC125613.1       | -1.42 | 2.34E-02 | 0.0492 |
| PTP4A1           | -1.42 | 2.11E-03 | 0.0098 |
| AC007342.4       | -1.42 | 4.67E-03 | 0.0161 |
| KIAA1109         | -1.42 | 3.94E-04 | 0.0040 |

|                  |       |          |        |
|------------------|-------|----------|--------|
| ULK4             | -1.43 | 1.46E-03 | 0.0080 |
| ZBTB16           | -1.43 | 1.50E-02 | 0.0356 |
| LINC02615        | -1.43 | 7.66E-03 | 0.0224 |
| OR2F1            | -1.43 | 5.75E-03 | 0.0185 |
| SNORA75          | -1.43 | 3.64E-03 | 0.0137 |
| TRIM2            | -1.43 | 6.78E-03 | 0.0206 |
| PARD3B           | -1.43 | 1.16E-02 | 0.0297 |
| SNORA2B          | -1.43 | 4.36E-03 | 0.0154 |
| AL133372.2       | -1.43 | 2.98E-03 | 0.0121 |
| AC021683.3       | -1.43 | 3.17E-03 | 0.0126 |
| FAM124B          | -1.43 | 4.07E-03 | 0.0148 |
| ATCAY            | -1.43 | 6.50E-03 | 0.0200 |
| IKZF2            | -1.43 | 2.96E-03 | 0.0121 |
| BVES             | -1.43 | 3.84E-03 | 0.0142 |
| AC078880.1       | -1.43 | 7.45E-03 | 0.0220 |
| CD302            | -1.43 | 4.10E-03 | 0.0148 |
| AC008870.1       | -1.43 | 5.33E-03 | 0.0176 |
| ARL15            | -1.43 | 1.65E-03 | 0.0085 |
| RN7SL258P        | -1.43 | 1.95E-02 | 0.0431 |
| FP236383.1       | -1.43 | 9.87E-03 | 0.0265 |
| FP671120.1       | -1.43 | 9.87E-03 | 0.0265 |
| RETREG1          | -1.43 | 7.14E-04 | 0.0054 |
| TFPI             | -1.43 | 3.18E-03 | 0.0126 |
| AL162615.1       | -1.43 | 3.77E-03 | 0.0140 |
| ZBTB10           | -1.43 | 5.66E-04 | 0.0048 |
| OR5AS1           | -1.43 | 5.23E-04 | 0.0045 |
| AL008729.1       | -1.43 | 4.27E-03 | 0.0152 |
| SCRG1            | -1.43 | 2.56E-03 | 0.0111 |
| RICTOR           | -1.43 | 5.79E-04 | 0.0048 |
| RNF157           | -1.43 | 1.98E-03 | 0.0095 |
| OR10G4           | -1.43 | 2.11E-02 | 0.0455 |
| OR7E122P         | -1.43 | 1.14E-03 | 0.0069 |
| OR2AT4           | -1.44 | 1.19E-03 | 0.0071 |
| TEX35            | -1.44 | 1.80E-03 | 0.0090 |
| SPPL3            | -1.44 | 5.43E-03 | 0.0178 |
| AC000120.1       | -1.44 | 1.66E-03 | 0.0086 |
| AC078795.2       | -1.44 | 9.83E-03 | 0.0265 |
| TRBV10-3         | -1.44 | 2.25E-03 | 0.0102 |
| SLC39A12-AS1     | -1.44 | 2.98E-03 | 0.0121 |
| AC103760.1       | -1.44 | 3.33E-03 | 0.0130 |
| LINC01297        | -1.44 | 5.25E-03 | 0.0174 |
| MAPK10           | -1.44 | 7.58E-04 | 0.0055 |
| ADH4             | -1.44 | 4.28E-03 | 0.0153 |
| FRRS1L           | -1.44 | 1.01E-02 | 0.0269 |
| ENST000003221531 | -1.44 | 2.08E-03 | 0.0098 |
| BRD1             | -1.44 | 3.88E-04 | 0.0040 |
| ZNF44            | -1.44 | 1.07E-03 | 0.0067 |

|                  |       |          |        |
|------------------|-------|----------|--------|
| HFE              | -1.44 | 4.87E-03 | 0.0166 |
| TLR10            | -1.44 | 9.60E-03 | 0.0261 |
| AL133284.1       | -1.44 | 2.11E-02 | 0.0455 |
| SRSF5            | -1.44 | 2.64E-04 | 0.0034 |
| AC092802.1       | -1.44 | 2.19E-03 | 0.0100 |
| AC074032.1       | -1.44 | 6.47E-03 | 0.0200 |
| OR4D9            | -1.44 | 3.02E-03 | 0.0122 |
| AC092611.1       | -1.44 | 1.31E-02 | 0.0324 |
| YWHABP2          | -1.44 | 1.31E-02 | 0.0324 |
| CBR3-AS1         | -1.45 | 4.09E-03 | 0.0148 |
| AC011405.1       | -1.45 | 8.68E-03 | 0.0243 |
| ENST000002541821 | -1.45 | 2.00E-02 | 0.0438 |
| GSTM2            | -1.45 | 6.17E-03 | 0.0194 |
| SNORA31          | -1.45 | 1.88E-02 | 0.0420 |
| LINC00507        | -1.45 | 9.38E-03 | 0.0257 |
| GNG12-AS1        | -1.45 | 2.01E-02 | 0.0440 |
| AC109460.2       | -1.45 | 1.49E-02 | 0.0355 |
| AC020978.6       | -1.45 | 2.32E-03 | 0.0104 |
| PLG              | -1.45 | 1.50E-02 | 0.0357 |
| NCOA5            | -1.45 | 1.55E-02 | 0.0365 |
| ENST000002584840 | -1.45 | 3.42E-04 | 0.0038 |
| AC245060.6       | -1.45 | 1.80E-02 | 0.0408 |
| COL8A1           | -1.45 | 1.48E-02 | 0.0355 |
| EPB41L4A         | -1.45 | 6.41E-03 | 0.0198 |
| AC012349.1       | -1.45 | 2.65E-03 | 0.0113 |
| AC116535.1       | -1.45 | 2.07E-02 | 0.0449 |
| ADPRM            | -1.45 | 2.46E-03 | 0.0108 |
| SRSF8            | -1.45 | 4.63E-03 | 0.0160 |
| ENST000002541081 | -1.45 | 4.56E-03 | 0.0159 |
| EZH1             | -1.45 | 7.71E-04 | 0.0056 |
| AC046158.2       | -1.45 | 2.07E-02 | 0.0450 |
| RBFOX3           | -1.45 | 1.76E-02 | 0.0400 |
| AP000350.10      | -1.45 | 2.17E-03 | 0.0100 |
| AP000350.7       | -1.45 | 2.17E-03 | 0.0100 |
| DNAH2            | -1.45 | 2.68E-03 | 0.0114 |
| AC008669.1       | -1.45 | 4.70E-03 | 0.0162 |
| AP005131.1       | -1.45 | 3.60E-03 | 0.0136 |
| OSTM1            | -1.45 | 2.49E-03 | 0.0109 |
| AC108693.1       | -1.45 | 1.89E-03 | 0.0093 |
| C13orf46         | -1.45 | 1.26E-02 | 0.0315 |
| AP003175.1       | -1.45 | 1.83E-03 | 0.0091 |
| AC027338.1       | -1.45 | 2.06E-02 | 0.0448 |
| OR52A1           | -1.45 | 3.84E-03 | 0.0142 |
| LINC01358        | -1.46 | 4.74E-03 | 0.0163 |
| SNORD14A         | -1.46 | 3.30E-03 | 0.0129 |
| ACYP2            | -1.46 | 1.58E-03 | 0.0083 |
| AC244197.3       | -1.46 | 2.97E-03 | 0.0121 |

|                  |       |          |        |
|------------------|-------|----------|--------|
| ZXDB             | -1.46 | 1.13E-03 | 0.0069 |
| AC010186.3       | -1.46 | 1.92E-03 | 0.0094 |
| NBPF25P          | -1.46 | 8.15E-03 | 0.0233 |
| SNN              | -1.46 | 1.02E-03 | 0.0065 |
| AL157938.3       | -1.46 | 1.36E-02 | 0.0333 |
| COLEC11          | -1.46 | 8.85E-03 | 0.0246 |
| KCNIP4-IT1       | -1.46 | 5.65E-03 | 0.0183 |
| LEF1             | -1.46 | 7.95E-04 | 0.0057 |
| AC010485.1       | -1.46 | 1.09E-02 | 0.0284 |
| FTX              | -1.46 | 8.56E-04 | 0.0059 |
| AC010186.2       | -1.46 | 1.14E-03 | 0.0069 |
| AC005089.1       | -1.46 | 1.16E-02 | 0.0298 |
| C1orf54          | -1.46 | 1.37E-02 | 0.0335 |
| SH3YL1           | -1.46 | 2.79E-03 | 0.0116 |
| CNOT6L           | -1.46 | 4.26E-04 | 0.0041 |
| N4BP2L2-IT2      | -1.46 | 7.52E-03 | 0.0221 |
| FRK              | -1.46 | 2.08E-03 | 0.0097 |
| LRRC37A3         | -1.46 | 8.71E-03 | 0.0244 |
| GABPB1-IT1       | -1.47 | 4.77E-04 | 0.0044 |
| INPP5D           | -1.47 | 2.34E-03 | 0.0105 |
| ART4             | -1.47 | 2.23E-02 | 0.0475 |
| ABCA7            | -1.47 | 2.04E-02 | 0.0445 |
| TRAV8-3          | -1.47 | 2.11E-03 | 0.0098 |
| FAM160A1         | -1.47 | 2.32E-02 | 0.0488 |
| HNMT             | -1.47 | 1.73E-02 | 0.0396 |
| GVINP1           | -1.47 | 3.26E-04 | 0.0037 |
| UPF3AP3          | -1.47 | 1.34E-02 | 0.0329 |
| RASEF            | -1.47 | 7.59E-03 | 0.0222 |
| C8orf34          | -1.47 | 1.33E-03 | 0.0075 |
| UTY              | -1.47 | 7.01E-04 | 0.0054 |
| GPR75            | -1.47 | 6.70E-03 | 0.0204 |
| AC087164.1       | -1.47 | 3.04E-03 | 0.0122 |
| SUGCT            | -1.47 | 1.56E-02 | 0.0367 |
| TEX41            | -1.47 | 2.16E-03 | 0.0100 |
| ENST000003392821 | -1.47 | 7.68E-04 | 0.0056 |
| KLK10            | -1.47 | 1.72E-02 | 0.0394 |
| FAM180B          | -1.47 | 2.24E-02 | 0.0476 |
| BLCAP            | -1.47 | 1.04E-03 | 0.0066 |
| NSFP1            | -1.47 | 9.04E-04 | 0.0061 |
| MTSS1            | -1.47 | 2.15E-03 | 0.0099 |
| ABCA6            | -1.47 | 5.77E-03 | 0.0185 |
| ENST000003585110 | -1.48 | 2.34E-02 | 0.0490 |
| RNF103           | -1.48 | 1.20E-03 | 0.0071 |
| OVGP1            | -1.48 | 1.33E-03 | 0.0075 |
| AL353708.3       | -1.48 | 6.01E-03 | 0.0190 |
| AC096711.2       | -1.48 | 1.89E-03 | 0.0093 |
| CCNL1            | -1.48 | 1.60E-04 | 0.0027 |

|                  |       |          |        |
|------------------|-------|----------|--------|
| AC010329.1       | -1.48 | 1.14E-02 | 0.0294 |
| AC010329.4       | -1.48 | 1.14E-02 | 0.0294 |
| SNORA28          | -1.48 | 1.24E-03 | 0.0073 |
| RSRP1            | -1.48 | 3.80E-04 | 0.0039 |
| AC136475.1       | -1.48 | 1.11E-02 | 0.0289 |
| CASP14           | -1.48 | 7.81E-03 | 0.0227 |
| ADCY4            | -1.48 | 8.99E-03 | 0.0249 |
| FBXO10           | -1.48 | 7.10E-03 | 0.0213 |
| POT1-AS1         | -1.48 | 1.43E-03 | 0.0079 |
| ENST000002825162 | -1.48 | 1.51E-02 | 0.0359 |
| EFCAB5           | -1.48 | 1.11E-02 | 0.0288 |
| AC092612.1       | -1.48 | 4.22E-03 | 0.0151 |
| NKAPP1           | -1.48 | 2.18E-03 | 0.0100 |
| AF165147.1       | -1.48 | 2.71E-03 | 0.0115 |
| UBE4B            | -1.48 | 1.07E-02 | 0.0280 |
| ENST000003296231 | -1.49 | 3.85E-03 | 0.0142 |
| MACROD2          | -1.49 | 7.27E-03 | 0.0216 |
| SBF2             | -1.49 | 1.21E-02 | 0.0307 |
| FUT1             | -1.49 | 6.46E-03 | 0.0199 |
| VAMP2            | -1.49 | 2.99E-03 | 0.0121 |
| FAM13B           | -1.49 | 4.07E-04 | 0.0041 |
| Z98259.3         | -1.49 | 1.86E-03 | 0.0092 |
| AL049830.3       | -1.49 | 1.17E-02 | 0.0300 |
| BMP8B            | -1.49 | 4.14E-03 | 0.0149 |
| NANOG            | -1.49 | 6.37E-03 | 0.0197 |
| GIMAP2           | -1.49 | 4.15E-04 | 0.0041 |
| PELI2            | -1.49 | 1.02E-03 | 0.0065 |
| AC004494.1       | -1.49 | 1.95E-02 | 0.0431 |
| TM4SF19-AS1      | -1.49 | 5.80E-03 | 0.0186 |
| GRIA1            | -1.49 | 4.33E-03 | 0.0154 |
| AC012651.1       | -1.49 | 3.79E-03 | 0.0141 |
| SECISBP2         | -1.49 | 3.78E-04 | 0.0039 |
| ZNF350           | -1.50 | 1.22E-03 | 0.0072 |
| TSNAX-DISC1      | -1.50 | 3.42E-03 | 0.0132 |
| GOLGA8B          | -1.50 | 8.12E-04 | 0.0057 |
| Z94721.2         | -1.50 | 1.42E-02 | 0.0343 |
| TJP3             | -1.50 | 7.28E-03 | 0.0216 |
| MGAT4C           | -1.50 | 3.08E-03 | 0.0123 |
| CCNK             | -1.50 | 7.23E-04 | 0.0054 |
| AC107958.2       | -1.50 | 3.59E-03 | 0.0136 |
| SLC2A14          | -1.50 | 1.21E-02 | 0.0307 |
| SPATA6L          | -1.50 | 4.41E-03 | 0.0155 |
| ASIC4            | -1.50 | 8.00E-03 | 0.0231 |
| KLF3-AS1         | -1.50 | 1.81E-03 | 0.0090 |
| SFT2D3           | -1.50 | 1.73E-03 | 0.0088 |
| AL022323.3       | -1.50 | 3.27E-03 | 0.0128 |
| RHOA-IT1         | -1.50 | 7.83E-03 | 0.0227 |

|                  |       |          |        |
|------------------|-------|----------|--------|
| ZBTB20-AS4       | -1.50 | 1.98E-02 | 0.0436 |
| AC073052.1       | -1.50 | 2.59E-03 | 0.0112 |
| TNIK             | -1.50 | 2.04E-03 | 0.0096 |
| AP003716.1       | -1.50 | 5.62E-03 | 0.0182 |
| AC241952.1       | -1.50 | 4.48E-03 | 0.0157 |
| CPAMD8           | -1.50 | 1.52E-02 | 0.0361 |
| SNX29            | -1.50 | 6.84E-04 | 0.0053 |
| ZNF41            | -1.50 | 8.80E-03 | 0.0246 |
| MIR181A1HG       | -1.50 | 3.31E-03 | 0.0129 |
| ENST000003247652 | -1.50 | 1.62E-03 | 0.0085 |
| AC083899.2       | -1.50 | 1.90E-02 | 0.0423 |
| SRP14P3          | -1.50 | 7.63E-03 | 0.0223 |
| MALINC1          | -1.50 | 1.62E-03 | 0.0085 |
| ARMC2            | -1.50 | 1.68E-02 | 0.0387 |
| JUN              | -1.51 | 1.43E-03 | 0.0079 |
| SHISA2           | -1.51 | 2.08E-02 | 0.0451 |
| AL121652.1       | -1.51 | 8.00E-03 | 0.0231 |
| RPGR             | -1.51 | 2.30E-03 | 0.0103 |
| EPHA1-AS1        | -1.51 | 9.34E-04 | 0.0062 |
| MAGI2            | -1.51 | 1.67E-03 | 0.0086 |
| ENST000003199800 | -1.51 | 4.05E-03 | 0.0147 |
| AP001033.2       | -1.51 | 6.88E-03 | 0.0208 |
| TSBP1-AS1        | -1.51 | 5.79E-03 | 0.0186 |
| ENST000003033910 | -1.51 | 1.16E-02 | 0.0298 |
| OR10A6           | -1.51 | 1.91E-03 | 0.0093 |
| RHBDD2           | -1.51 | 1.39E-03 | 0.0077 |
| AL023495.1       | -1.51 | 1.14E-02 | 0.0294 |
| RPS16P5          | -1.51 | 3.25E-03 | 0.0128 |
| AC084782.1       | -1.51 | 2.77E-03 | 0.0116 |
| ZNF497           | -1.51 | 2.45E-03 | 0.0108 |
| TRAJ2            | -1.51 | 5.45E-03 | 0.0178 |
| SOX13            | -1.51 | 2.31E-03 | 0.0104 |
| LINC01204        | -1.51 | 1.21E-02 | 0.0308 |
| AC079921.2       | -1.51 | 5.56E-03 | 0.0181 |
| AC026316.3       | -1.51 | 1.69E-02 | 0.0388 |
| GIMAP7           | -1.51 | 3.04E-03 | 0.0122 |
| LOH12CR2         | -1.51 | 1.05E-02 | 0.0276 |
| AL139220.2       | -1.51 | 8.46E-03 | 0.0239 |
| FRAT2            | -1.51 | 1.48E-03 | 0.0081 |
| AL139397.1       | -1.51 | 1.80E-02 | 0.0408 |
| AL356966.1       | -1.51 | 7.24E-03 | 0.0215 |
| PWAR6            | -1.52 | 6.59E-03 | 0.0202 |
| HRH4             | -1.52 | 2.20E-02 | 0.0470 |
| SLC7A14          | -1.52 | 1.42E-02 | 0.0344 |
| MIRLET7BHG       | -1.52 | 5.33E-03 | 0.0176 |
| ENST000002294650 | -1.52 | 4.26E-03 | 0.0152 |
| LO000005.1       | -1.52 | 7.55E-04 | 0.0055 |

|                  |       |          |        |
|------------------|-------|----------|--------|
| AC093849.1       | -1.52 | 1.56E-02 | 0.0368 |
| AC079416.1       | -1.52 | 1.78E-03 | 0.0089 |
| ZNF836           | -1.52 | 5.69E-04 | 0.0048 |
| ZFAND4           | -1.52 | 8.61E-04 | 0.0059 |
| LINC01268        | -1.52 | 2.89E-03 | 0.0119 |
| LINC00504        | -1.52 | 6.87E-04 | 0.0053 |
| CELF6            | -1.52 | 4.97E-03 | 0.0168 |
| AC022540.1       | -1.52 | 2.65E-03 | 0.0113 |
| ENST000003164851 | -1.52 | 1.03E-03 | 0.0066 |
| AC015802.3       | -1.52 | 2.31E-02 | 0.0487 |
| AC103810.1       | -1.52 | 2.27E-02 | 0.0480 |
| AL139317.3       | -1.52 | 1.04E-02 | 0.0276 |
| CNR2             | -1.52 | 2.81E-03 | 0.0117 |
| ZNF233           | -1.53 | 1.55E-02 | 0.0365 |
| FABP2            | -1.53 | 1.39E-03 | 0.0077 |
| TIPARP           | -1.53 | 1.85E-03 | 0.0091 |
| ENST000002603235 | -1.53 | 2.37E-02 | 0.0496 |
| FGD3             | -1.53 | 3.73E-04 | 0.0039 |
| METTL25          | -1.53 | 1.03E-03 | 0.0066 |
| THBS1            | -1.53 | 2.29E-02 | 0.0483 |
| WDR78            | -1.53 | 1.95E-03 | 0.0094 |
| RN7SKP181        | -1.53 | 8.81E-03 | 0.0246 |
| Z83843.1         | -1.53 | 7.24E-04 | 0.0054 |
| 37226            | -1.53 | 9.39E-04 | 0.0063 |
| LINC01793        | -1.53 | 2.17E-02 | 0.0466 |
| BICRAL           | -1.53 | 4.70E-04 | 0.0044 |
| LINC00894        | -1.53 | 8.14E-03 | 0.0233 |
| TMEM220          | -1.53 | 5.78E-03 | 0.0186 |
| RAB40B           | -1.53 | 5.22E-03 | 0.0174 |
| OTX2-AS1         | -1.53 | 1.79E-02 | 0.0405 |
| ENST000003072160 | -1.53 | 3.43E-03 | 0.0132 |
| STX17-AS1        | -1.54 | 1.47E-02 | 0.0352 |
| PDHB             | -1.54 | 1.69E-03 | 0.0086 |
| DENND6A          | -1.54 | 4.74E-04 | 0.0044 |
| PAX6             | -1.54 | 3.59E-03 | 0.0136 |
| MIR548AJ2        | -1.54 | 6.07E-03 | 0.0192 |
| KPNA5            | -1.54 | 2.14E-04 | 0.0031 |
| ASPA             | -1.54 | 5.45E-03 | 0.0178 |
| PPM1L            | -1.54 | 1.58E-02 | 0.0370 |
| SCARNA4          | -1.54 | 2.70E-03 | 0.0114 |
| AC145138.1       | -1.54 | 1.02E-02 | 0.0272 |
| AC078880.4       | -1.54 | 1.67E-03 | 0.0086 |
| CTSW             | -1.54 | 7.25E-03 | 0.0215 |
| ENST000003574440 | -1.54 | 7.45E-03 | 0.0220 |
| SMAGP            | -1.54 | 3.81E-03 | 0.0141 |
| CLK1             | -1.54 | 8.85E-04 | 0.0060 |
| SGMS1            | -1.54 | 7.93E-04 | 0.0057 |

|                  |       |          |        |
|------------------|-------|----------|--------|
| AVPI1            | -1.54 | 3.09E-03 | 0.0124 |
| ZNF879           | -1.54 | 1.22E-03 | 0.0072 |
| ABI3BP           | -1.55 | 6.40E-03 | 0.0198 |
| TENM3-AS1        | -1.55 | 1.04E-02 | 0.0275 |
| LCMT1-AS2        | -1.55 | 2.18E-02 | 0.0466 |
| RF00017.187      | -1.55 | 9.64E-03 | 0.0261 |
| TMEM212          | -1.55 | 1.21E-03 | 0.0072 |
| RCAN3            | -1.55 | 2.22E-04 | 0.0031 |
| ENST000002505593 | -1.55 | 4.93E-04 | 0.0044 |
| SLC6A16          | -1.55 | 3.25E-03 | 0.0128 |
| AC027796.5       | -1.55 | 1.63E-02 | 0.0378 |
| AL355306.2       | -1.55 | 8.60E-03 | 0.0242 |
| AC078845.1       | -1.55 | 1.33E-02 | 0.0328 |
| AL357054.1       | -1.55 | 9.41E-03 | 0.0257 |
| CTCFL            | -1.55 | 1.21E-03 | 0.0072 |
| NDRG2            | -1.55 | 1.44E-03 | 0.0079 |
| PPDPF            | -1.55 | 2.03E-02 | 0.0444 |
| NLRC3            | -1.55 | 7.67E-04 | 0.0056 |
| KAT6B            | -1.55 | 3.61E-04 | 0.0038 |
| SYNJ2BP          | -1.55 | 1.34E-03 | 0.0076 |
| NBPF19           | -1.55 | 2.40E-04 | 0.0032 |
| HEG1             | -1.55 | 6.07E-03 | 0.0192 |
| ENST000003114591 | -1.55 | 4.20E-04 | 0.0041 |
| LRGUK            | -1.56 | 1.58E-02 | 0.0371 |
| AC121333.1       | -1.56 | 5.11E-04 | 0.0045 |
| ITIH4            | -1.56 | 1.15E-02 | 0.0296 |
| AC022706.1       | -1.56 | 1.97E-03 | 0.0095 |
| ILF3-DT          | -1.56 | 5.41E-04 | 0.0046 |
| SNORA49          | -1.56 | 2.75E-03 | 0.0115 |
| AC079203.1       | -1.56 | 1.44E-02 | 0.0347 |
| OR1C1            | -1.56 | 4.08E-03 | 0.0148 |
| PLEKHD1          | -1.56 | 1.20E-02 | 0.0306 |
| AC087359.1       | -1.56 | 5.84E-03 | 0.0187 |
| AC144450.1       | -1.56 | 4.47E-03 | 0.0157 |
| KCNJ3            | -1.56 | 1.51E-02 | 0.0359 |
| AC244207.2       | -1.56 | 2.26E-02 | 0.0480 |
| ZNF513           | -1.56 | 2.77E-03 | 0.0116 |
| BEST3            | -1.56 | 2.74E-03 | 0.0115 |
| HMG2P28          | -1.56 | 2.22E-02 | 0.0473 |
| LINC01881        | -1.56 | 1.04E-03 | 0.0066 |
| FBXL17           | -1.56 | 4.72E-04 | 0.0044 |
| TMEM30B          | -1.56 | 1.26E-03 | 0.0073 |
| BIN2             | -1.56 | 3.35E-04 | 0.0037 |
| AP002884.4       | -1.56 | 1.39E-02 | 0.0338 |
| AC010632.2       | -1.56 | 5.40E-03 | 0.0177 |
| NELL2            | -1.57 | 1.32E-02 | 0.0326 |
| LINC00674        | -1.57 | 4.00E-03 | 0.0146 |



|                  |       |          |        |
|------------------|-------|----------|--------|
| S1PR4            | -1.57 | 4.89E-03 | 0.0166 |
| AC007906.2       | -1.57 | 1.17E-02 | 0.0299 |
| FMO5             | -1.57 | 4.36E-03 | 0.0154 |
| ENST000003115953 | -1.57 | 1.04E-03 | 0.0066 |
| POC1B-AS1        | -1.57 | 1.58E-02 | 0.0371 |
| DPRXP3           | -1.57 | 4.50E-03 | 0.0157 |
| AC010531.3       | -1.57 | 2.89E-03 | 0.0118 |
| EBF1             | -1.57 | 2.13E-02 | 0.0460 |
| FAM172A          | -1.57 | 2.89E-04 | 0.0035 |
| ENST000002850130 | -1.57 | 4.27E-03 | 0.0152 |
| RNU6-341P        | -1.57 | 8.54E-03 | 0.0241 |
| CCDC26           | -1.57 | 1.40E-03 | 0.0078 |
| EGFLAM           | -1.57 | 1.43E-02 | 0.0345 |
| LINC00239        | -1.57 | 1.83E-03 | 0.0091 |
| TRIM62           | -1.57 | 2.64E-03 | 0.0113 |
| LRRC70           | -1.57 | 2.63E-03 | 0.0113 |
| TRDN-AS1         | -1.58 | 1.15E-02 | 0.0295 |
| NEBL             | -1.58 | 5.70E-03 | 0.0184 |
| AL138899.1       | -1.58 | 7.75E-04 | 0.0056 |
| AC068338.2       | -1.58 | 1.54E-02 | 0.0364 |
| LINC00937        | -1.58 | 1.74E-03 | 0.0088 |
| PMP2             | -1.58 | 1.49E-02 | 0.0355 |
| LINC02204        | -1.58 | 2.18E-02 | 0.0467 |
| RPL5P13          | -1.58 | 1.77E-02 | 0.0402 |
| AC073065.1       | -1.58 | 1.65E-02 | 0.0382 |
| ENST000003735040 | -1.58 | 8.80E-04 | 0.0060 |
| STON2            | -1.58 | 1.71E-02 | 0.0392 |
| AC006017.1       | -1.58 | 6.11E-03 | 0.0192 |
| NUPR1            | -1.58 | 3.42E-03 | 0.0132 |
| AC133644.2       | -1.58 | 1.67E-03 | 0.0086 |
| ENST000002496360 | -1.58 | 2.87E-04 | 0.0035 |
| AC005332.3       | -1.58 | 2.88E-03 | 0.0118 |
| AL049651.1       | -1.58 | 2.22E-02 | 0.0473 |
| SLC35E2B         | -1.58 | 1.31E-03 | 0.0075 |
| AC008937.3       | -1.58 | 2.26E-03 | 0.0102 |
| NKTR             | -1.58 | 1.37E-03 | 0.0077 |
| DAAM1            | -1.58 | 5.93E-03 | 0.0189 |
| CC2D2B           | -1.58 | 9.27E-03 | 0.0254 |
| RNF139           | -1.58 | 2.06E-04 | 0.0030 |
| CHST12           | -1.58 | 9.17E-04 | 0.0062 |
| AC126773.4       | -1.58 | 3.27E-03 | 0.0128 |
| LINC00926        | -1.58 | 6.36E-03 | 0.0197 |
| CLEC7A           | -1.58 | 1.69E-03 | 0.0087 |
| ENST000003606690 | -1.58 | 2.09E-03 | 0.0098 |
| DPP6             | -1.58 | 1.81E-02 | 0.0408 |
| LINC02362        | -1.59 | 1.05E-02 | 0.0277 |
| ARHGAP22         | -1.59 | 1.33E-02 | 0.0329 |

|                  |       |          |        |
|------------------|-------|----------|--------|
| AL360013.2       | -1.59 | 2.88E-03 | 0.0118 |
| MBD5             | -1.59 | 2.82E-03 | 0.0117 |
| SGMS1-AS1        | -1.59 | 1.33E-03 | 0.0075 |
| ENST000002991672 | -1.59 | 6.81E-04 | 0.0053 |
| HHAT             | -1.59 | 1.46E-02 | 0.0351 |
| AP001429.1       | -1.59 | 5.28E-03 | 0.0174 |
| PTCSC3           | -1.59 | 3.71E-03 | 0.0139 |
| FRG1JP           | -1.59 | 2.37E-02 | 0.0496 |
| TEX26-AS1        | -1.59 | 9.03E-03 | 0.0250 |
| AFAP1L2          | -1.59 | 2.18E-02 | 0.0467 |
| GPCPD1           | -1.59 | 9.98E-04 | 0.0064 |
| TTC12            | -1.59 | 1.93E-03 | 0.0094 |
| MCTP1            | -1.59 | 1.28E-02 | 0.0319 |
| AC074366.1       | -1.59 | 5.42E-03 | 0.0178 |
| IYD              | -1.59 | 1.03E-03 | 0.0066 |
| IKZF5            | -1.59 | 6.81E-04 | 0.0053 |
| WIPF1            | -1.59 | 3.21E-04 | 0.0037 |
| PRKXP1           | -1.59 | 2.40E-03 | 0.0106 |
| CREG2            | -1.59 | 3.32E-03 | 0.0129 |
| ENST000003382572 | -1.60 | 2.35E-03 | 0.0105 |
| LRRC37A17P       | -1.60 | 1.12E-02 | 0.0289 |
| ABCD2            | -1.60 | 7.36E-03 | 0.0218 |
| KIAA0825         | -1.60 | 8.60E-04 | 0.0059 |
| AC006145.1       | -1.60 | 5.77E-03 | 0.0185 |
| AC009090.1       | -1.60 | 4.14E-03 | 0.0149 |
| ENST000003263511 | -1.60 | 1.66E-02 | 0.0385 |
| MYO1F            | -1.60 | 4.09E-04 | 0.0041 |
| AP000347.1       | -1.60 | 9.35E-04 | 0.0062 |
| CCDC102B         | -1.60 | 1.31E-03 | 0.0075 |
| BCL11B           | -1.60 | 1.50E-04 | 0.0026 |
| AC095057.3       | -1.60 | 1.01E-03 | 0.0065 |
| SPEG             | -1.60 | 4.37E-03 | 0.0154 |
| AL353804.1       | -1.60 | 3.31E-03 | 0.0129 |
| CCDC83           | -1.60 | 6.54E-03 | 0.0201 |
| EMB              | -1.60 | 4.26E-04 | 0.0041 |
| AC136489.1       | -1.60 | 1.14E-02 | 0.0293 |
| RNF139-AS1       | -1.60 | 1.03E-03 | 0.0066 |
| AL590822.2       | -1.60 | 5.11E-03 | 0.0171 |
| BTN3A1           | -1.60 | 2.70E-04 | 0.0034 |
| AC092903.2       | -1.60 | 1.41E-02 | 0.0341 |
| FAM8A1           | -1.60 | 4.81E-04 | 0.0044 |
| MIR186           | -1.60 | 5.30E-03 | 0.0175 |
| TSPAN10          | -1.60 | 2.04E-03 | 0.0096 |
| AC146507.2       | -1.61 | 9.35E-03 | 0.0256 |
| ENST000003192940 | -1.61 | 2.32E-02 | 0.0487 |
| HSD17B2          | -1.61 | 9.72E-04 | 0.0064 |
| AC027455.2       | -1.61 | 2.30E-03 | 0.0104 |

|                  |       |          |        |
|------------------|-------|----------|--------|
| OR2A3P           | -1.61 | 3.27E-03 | 0.0128 |
| AC009754.1       | -1.61 | 1.62E-03 | 0.0085 |
| SLC16A10         | -1.61 | 4.27E-03 | 0.0152 |
| RN7SKP70         | -1.61 | 2.80E-03 | 0.0116 |
| KIZ-AS1          | -1.61 | 1.37E-02 | 0.0335 |
| AC025164.1       | -1.61 | 2.96E-03 | 0.0121 |
| PDZD7            | -1.61 | 1.67E-03 | 0.0086 |
| PPIAP41          | -1.61 | 2.77E-03 | 0.0116 |
| OR14J1           | -1.61 | 1.57E-03 | 0.0083 |
| CALCOCO1         | -1.61 | 3.26E-04 | 0.0037 |
| TRIM52           | -1.61 | 2.31E-04 | 0.0032 |
| CCDC180          | -1.61 | 5.14E-04 | 0.0045 |
| SP2              | -1.61 | 2.21E-03 | 0.0101 |
| USP3             | -1.61 | 6.14E-04 | 0.0050 |
| OR1A1            | -1.61 | 1.37E-03 | 0.0077 |
| AC003991.1       | -1.61 | 6.13E-03 | 0.0193 |
| KCNB1            | -1.61 | 1.00E-03 | 0.0065 |
| ZNF33B           | -1.61 | 3.09E-04 | 0.0036 |
| CD84             | -1.61 | 1.91E-03 | 0.0093 |
| CD52             | -1.62 | 8.49E-04 | 0.0059 |
| ENST000003190801 | -1.62 | 2.60E-03 | 0.0112 |
| AC092902.4       | -1.62 | 4.15E-04 | 0.0041 |
| OR55B1P          | -1.62 | 6.47E-03 | 0.0199 |
| PCDHGA8          | -1.62 | 2.50E-03 | 0.0109 |
| ACVR2B-AS1       | -1.62 | 4.83E-03 | 0.0165 |
| AC000367.1       | -1.62 | 9.32E-04 | 0.0062 |
| PRKCB            | -1.62 | 6.93E-03 | 0.0209 |
| NDE1P2           | -1.62 | 2.06E-02 | 0.0449 |
| GPR85            | -1.62 | 8.85E-03 | 0.0246 |
| ATF7IP2          | -1.62 | 4.08E-04 | 0.0041 |
| TPRXL            | -1.62 | 1.69E-03 | 0.0087 |
| AL138749.1       | -1.62 | 1.94E-02 | 0.0429 |
| GOLGA8R          | -1.62 | 1.15E-02 | 0.0295 |
| CFAP44           | -1.62 | 9.66E-04 | 0.0063 |
| RF00017.25       | -1.62 | 1.54E-02 | 0.0364 |
| ENST000002779002 | -1.62 | 1.70E-04 | 0.0028 |
| LINC01949        | -1.63 | 6.85E-04 | 0.0053 |
| PRSS8            | -1.63 | 1.28E-02 | 0.0319 |
| ABCC3            | -1.63 | 4.01E-03 | 0.0146 |
| ARID1B           | -1.63 | 2.90E-04 | 0.0035 |
| AC009812.3       | -1.63 | 5.02E-03 | 0.0169 |
| AC006960.3       | -1.63 | 9.64E-03 | 0.0261 |
| YPEL2            | -1.63 | 2.35E-04 | 0.0032 |
| ENST000003328840 | -1.63 | 2.79E-03 | 0.0116 |
| CHMP7            | -1.63 | 3.20E-04 | 0.0037 |
| PGGHG            | -1.63 | 1.35E-02 | 0.0332 |
| AC124069.1       | -1.63 | 1.03E-02 | 0.0273 |

|                  |       |          |        |
|------------------|-------|----------|--------|
| AC009113.1       | -1.63 | 3.15E-03 | 0.0125 |
| PDCD4            | -1.63 | 2.99E-04 | 0.0035 |
| FAM210B          | -1.63 | 1.54E-03 | 0.0082 |
| ZXDA             | -1.63 | 6.27E-04 | 0.0050 |
| POTEI            | -1.63 | 1.12E-02 | 0.0290 |
| VAMP3            | -1.63 | 1.61E-03 | 0.0084 |
| EHD4-AS1         | -1.63 | 1.02E-02 | 0.0272 |
| NDEL1            | -1.63 | 7.43E-04 | 0.0055 |
| AC093752.2       | -1.63 | 1.17E-03 | 0.0070 |
| ZNF480           | -1.64 | 4.77E-03 | 0.0164 |
| ENST000002635760 | -1.64 | 8.63E-03 | 0.0242 |
| HLA-DPB2         | -1.64 | 5.19E-03 | 0.0173 |
| AL683807.1       | -1.64 | 1.60E-02 | 0.0374 |
| PCNX1            | -1.64 | 1.68E-04 | 0.0028 |
| HTR7P1           | -1.64 | 1.46E-03 | 0.0080 |
| HMGA2            | -1.64 | 1.94E-03 | 0.0094 |
| AC012103.1       | -1.64 | 1.96E-03 | 0.0094 |
| AC139494.3       | -1.64 | 4.85E-03 | 0.0165 |
| AL159169.2       | -1.64 | 8.41E-03 | 0.0238 |
| VNN1             | -1.64 | 7.02E-03 | 0.0211 |
| ENST000003133500 | -1.64 | 1.90E-02 | 0.0423 |
| KALRN            | -1.64 | 2.02E-03 | 0.0096 |
| ACKR3            | -1.64 | 7.75E-03 | 0.0226 |
| OR5A2            | -1.64 | 8.26E-03 | 0.0235 |
| ST6GAL2          | -1.64 | 2.86E-03 | 0.0118 |
| SMIM10L2A        | -1.64 | 1.91E-02 | 0.0426 |
| PTPRC            | -1.64 | 6.13E-04 | 0.0050 |
| ST8SIA1          | -1.64 | 1.14E-03 | 0.0069 |
| TPRKBP2          | -1.64 | 1.46E-02 | 0.0350 |
| AC016766.1       | -1.64 | 1.75E-02 | 0.0399 |
| CDKN2B-AS1       | -1.64 | 1.63E-03 | 0.0085 |
| LINC01197        | -1.64 | 2.32E-02 | 0.0487 |
| RN7SL834P        | -1.64 | 2.00E-03 | 0.0095 |
| AP005717.1       | -1.65 | 7.14E-03 | 0.0213 |
| AC026992.2       | -1.65 | 2.01E-02 | 0.0440 |
| AC011632.1       | -1.65 | 7.12E-03 | 0.0213 |
| ENST000002954000 | -1.65 | 1.05E-02 | 0.0277 |
| SKAP1            | -1.65 | 3.01E-04 | 0.0035 |
| NDRG1            | -1.65 | 6.45E-04 | 0.0051 |
| CRBN             | -1.65 | 1.43E-04 | 0.0026 |
| ENST00000498351  | -1.65 | 1.05E-03 | 0.0066 |
| ADD3             | -1.65 | 3.11E-04 | 0.0036 |
| OR5M2P           | -1.65 | 2.36E-03 | 0.0105 |
| DYNLT1           | -1.65 | 5.84E-04 | 0.0048 |
| ENST000003172211 | -1.65 | 1.06E-02 | 0.0278 |
| LINC01138        | -1.65 | 7.69E-04 | 0.0056 |
| AC118459.1       | -1.65 | 2.76E-03 | 0.0116 |

|                  |       |          |        |
|------------------|-------|----------|--------|
| RN7SL45P         | -1.65 | 1.46E-02 | 0.0350 |
| HMG1P8           | -1.65 | 1.32E-02 | 0.0326 |
| AMT              | -1.65 | 4.73E-03 | 0.0163 |
| RNU2-2P          | -1.65 | 5.11E-04 | 0.0045 |
| ERO1B            | -1.65 | 8.16E-04 | 0.0058 |
| CNDP1            | -1.65 | 8.27E-03 | 0.0236 |
| UGDH-AS1         | -1.65 | 2.04E-04 | 0.0030 |
| SLC26A11         | -1.65 | 1.73E-03 | 0.0088 |
| PYROXD2          | -1.65 | 5.75E-03 | 0.0185 |
| RF00019.186      | -1.65 | 1.62E-02 | 0.0377 |
| SLC6A4           | -1.65 | 1.21E-02 | 0.0307 |
| FAM66C           | -1.65 | 1.76E-03 | 0.0089 |
| MIR3936HG        | -1.66 | 1.82E-03 | 0.0091 |
| AL606760.3       | -1.66 | 3.52E-03 | 0.0134 |
| TRERF1           | -1.66 | 2.03E-03 | 0.0096 |
| ADAMTSL4         | -1.66 | 6.22E-03 | 0.0194 |
| RRN3P1           | -1.66 | 5.03E-04 | 0.0045 |
| AC007743.1       | -1.66 | 8.24E-04 | 0.0058 |
| AL049796.1       | -1.66 | 2.20E-02 | 0.0470 |
| EXOC6B           | -1.66 | 1.14E-03 | 0.0069 |
| PKD1L2           | -1.66 | 1.06E-03 | 0.0066 |
| AL360091.2       | -1.66 | 1.53E-02 | 0.0362 |
| AL117336.2       | -1.66 | 8.67E-03 | 0.0243 |
| AC139530.1       | -1.66 | 1.13E-03 | 0.0069 |
| RN7SL48P         | -1.66 | 2.17E-03 | 0.0100 |
| LRRC37A4P        | -1.66 | 3.99E-04 | 0.0040 |
| UBASH3B          | -1.66 | 3.57E-04 | 0.0038 |
| MYO3B-AS1        | -1.66 | 7.32E-03 | 0.0217 |
| ANKRD44          | -1.66 | 1.53E-04 | 0.0027 |
| RN7SL523P        | -1.66 | 1.80E-02 | 0.0408 |
| PXN              | -1.66 | 2.05E-02 | 0.0447 |
| BCRP2            | -1.66 | 2.85E-03 | 0.0118 |
| OTULINL          | -1.66 | 1.95E-04 | 0.0030 |
| MPC1             | -1.67 | 1.15E-03 | 0.0070 |
| PLEKHA3P1        | -1.67 | 2.20E-02 | 0.0470 |
| AC108727.1       | -1.67 | 2.61E-03 | 0.0112 |
| CCDC91           | -1.67 | 3.45E-04 | 0.0038 |
| AC104452.1       | -1.67 | 7.43E-03 | 0.0219 |
| TAS2R45          | -1.67 | 3.14E-03 | 0.0125 |
| ENST000003447850 | -1.67 | 2.78E-03 | 0.0116 |
| AL157871.5       | -1.67 | 1.60E-03 | 0.0084 |
| RPL7L1P3         | -1.67 | 1.90E-02 | 0.0423 |
| TMEM50B          | -1.67 | 8.93E-04 | 0.0061 |
| AC103957.2       | -1.67 | 1.22E-03 | 0.0072 |
| RIMKLB           | -1.67 | 5.12E-03 | 0.0171 |
| AL355304.1       | -1.67 | 2.16E-02 | 0.0464 |
| ENST000002700011 | -1.67 | 8.23E-04 | 0.0058 |

|                  |       |          |        |
|------------------|-------|----------|--------|
| AL136146.2       | -1.67 | 5.29E-03 | 0.0175 |
| AURKAP1          | -1.67 | 1.03E-03 | 0.0066 |
| HACD4            | -1.67 | 3.75E-04 | 0.0039 |
| CYP2C9           | -1.67 | 1.90E-03 | 0.0093 |
| AC087854.1       | -1.67 | 8.53E-03 | 0.0241 |
| BAZ2B            | -1.67 | 1.53E-04 | 0.0027 |
| AC095057.2       | -1.68 | 6.92E-03 | 0.0209 |
| AL139147.1       | -1.68 | 7.46E-04 | 0.0055 |
| TAS2R14          | -1.68 | 8.64E-04 | 0.0059 |
| GPR82            | -1.68 | 2.12E-02 | 0.0458 |
| CHMP4BP1         | -1.68 | 1.27E-03 | 0.0074 |
| ATP2B1           | -1.68 | 4.57E-04 | 0.0043 |
| AC242842.1       | -1.68 | 1.01E-03 | 0.0065 |
| GCSAML           | -1.68 | 1.18E-03 | 0.0071 |
| HTRA4            | -1.68 | 1.12E-03 | 0.0069 |
| APOBR            | -1.68 | 5.96E-03 | 0.0190 |
| ENST000003376300 | -1.68 | 5.44E-03 | 0.0178 |
| AC114400.1       | -1.68 | 2.15E-02 | 0.0463 |
| AC092757.3       | -1.68 | 1.21E-02 | 0.0308 |
| ODF2L            | -1.68 | 2.49E-04 | 0.0033 |
| VNN3             | -1.68 | 1.38E-03 | 0.0077 |
| MAN1C1           | -1.68 | 1.32E-03 | 0.0075 |
| DISC1-IT1        | -1.68 | 1.50E-03 | 0.0081 |
| AL162457.1       | -1.68 | 3.95E-03 | 0.0144 |
| GOLGA8M          | -1.68 | 1.21E-02 | 0.0306 |
| ENST00000640587  | -1.68 | 1.41E-03 | 0.0078 |
| FBXO16           | -1.68 | 2.09E-02 | 0.0453 |
| ZNF154           | -1.68 | 9.35E-03 | 0.0256 |
| RGPD4-AS1        | -1.68 | 8.41E-03 | 0.0238 |
| NLRP1            | -1.68 | 4.41E-03 | 0.0155 |
| RN7SL284P        | -1.69 | 1.93E-02 | 0.0428 |
| TECR             | -1.69 | 7.48E-04 | 0.0055 |
| GRAMD4P3         | -1.69 | 1.38E-02 | 0.0336 |
| LINC02019        | -1.69 | 1.24E-02 | 0.0311 |
| AP000662.1       | -1.69 | 5.07E-03 | 0.0170 |
| AC073530.1       | -1.69 | 2.20E-02 | 0.0470 |
| AC023389.2       | -1.69 | 3.47E-03 | 0.0133 |
| AL591623.1       | -1.69 | 6.46E-04 | 0.0051 |
| AC091614.1       | -1.69 | 1.74E-03 | 0.0088 |
| C17orf77         | -1.69 | 1.21E-03 | 0.0072 |
| DNAH1            | -1.69 | 5.96E-03 | 0.0189 |
| CREBRF           | -1.69 | 2.37E-04 | 0.0032 |
| AC008555.2       | -1.69 | 2.38E-02 | 0.0498 |
| AC011287.2       | -1.69 | 8.29E-03 | 0.0236 |
| AC138028.1       | -1.69 | 1.95E-02 | 0.0431 |
| AC024568.1       | -1.69 | 1.16E-02 | 0.0298 |
| FBLN5            | -1.69 | 2.39E-02 | 0.0499 |

|                  |       |          |        |
|------------------|-------|----------|--------|
| MOGAT3           | -1.69 | 2.15E-03 | 0.0099 |
| SSTR5-AS1        | -1.69 | 1.95E-02 | 0.0431 |
| LINC01176        | -1.69 | 6.71E-03 | 0.0205 |
| Z82217.1         | -1.69 | 1.26E-03 | 0.0073 |
| AF131216.3       | -1.69 | 9.76E-03 | 0.0263 |
| SSPO             | -1.69 | 1.15E-02 | 0.0296 |
| LINC01776        | -1.69 | 2.21E-03 | 0.0101 |
| AL356235.1       | -1.69 | 9.26E-04 | 0.0062 |
| INPP4A           | -1.69 | 2.11E-04 | 0.0030 |
| SLC8B1           | -1.69 | 8.73E-04 | 0.0060 |
| TACC2            | -1.69 | 7.54E-04 | 0.0055 |
| AC010643.1       | -1.70 | 1.05E-02 | 0.0277 |
| LINC00205        | -1.70 | 5.93E-04 | 0.0049 |
| EIF1             | -1.70 | 7.02E-04 | 0.0054 |
| LINC02199        | -1.70 | 1.10E-02 | 0.0287 |
| NEB              | -1.70 | 2.08E-03 | 0.0097 |
| AC099792.1       | -1.70 | 5.71E-03 | 0.0184 |
| CHST5            | -1.70 | 2.21E-02 | 0.0472 |
| RNF38            | -1.70 | 2.07E-02 | 0.0450 |
| AL135999.1       | -1.70 | 7.99E-04 | 0.0057 |
| AL591485.1       | -1.70 | 1.81E-02 | 0.0409 |
| RN7SL282P        | -1.70 | 1.99E-02 | 0.0437 |
| PITPNM2          | -1.70 | 4.42E-03 | 0.0155 |
| AL160191.1       | -1.70 | 1.10E-03 | 0.0068 |
| AC104046.1       | -1.70 | 1.07E-02 | 0.0280 |
| DOP1A            | -1.70 | 1.94E-04 | 0.0030 |
| MIR4473          | -1.70 | 2.10E-02 | 0.0455 |
| AL391261.2       | -1.70 | 2.86E-03 | 0.0118 |
| ERVK-28          | -1.70 | 4.57E-03 | 0.0159 |
| SNORA74B         | -1.70 | 5.60E-04 | 0.0047 |
| TRMO             | -1.71 | 5.48E-04 | 0.0046 |
| MUC20            | -1.71 | 2.11E-03 | 0.0098 |
| SGO1-AS1         | -1.71 | 6.15E-03 | 0.0193 |
| AC139494.4       | -1.71 | 6.57E-03 | 0.0202 |
| AL133520.1       | -1.71 | 1.97E-02 | 0.0434 |
| ENST000003580750 | -1.71 | 1.94E-03 | 0.0094 |
| AL133492.1       | -1.71 | 1.12E-02 | 0.0290 |
| AC099550.1       | -1.71 | 1.33E-03 | 0.0075 |
| CYYR1-AS1        | -1.71 | 1.29E-03 | 0.0074 |
| Z98884.2         | -1.71 | 7.10E-03 | 0.0213 |
| GABBR1           | -1.71 | 5.10E-04 | 0.0045 |
| OR2A9P           | -1.71 | 1.18E-02 | 0.0301 |
| TBC1D4           | -1.71 | 1.98E-04 | 0.0030 |
| KLF11            | -1.71 | 5.25E-03 | 0.0174 |
| TAL1             | -1.71 | 1.54E-02 | 0.0364 |
| AL080317.3       | -1.71 | 2.27E-03 | 0.0103 |
| NPAP1            | -1.71 | 1.98E-03 | 0.0095 |

|                  |       |          |        |
|------------------|-------|----------|--------|
| CNTNAP2          | -1.71 | 5.05E-03 | 0.0170 |
| PBX3             | -1.71 | 4.41E-04 | 0.0042 |
| L3MBTL4-AS1      | -1.71 | 9.68E-04 | 0.0064 |
| ENST000003620061 | -1.71 | 8.72E-03 | 0.0244 |
| AC087286.4       | -1.72 | 4.97E-03 | 0.0168 |
| AC091170.1       | -1.72 | 5.93E-03 | 0.0189 |
| SGSM1            | -1.72 | 2.36E-03 | 0.0105 |
| LINC00426        | -1.72 | 4.56E-04 | 0.0043 |
| TNFRSF10A        | -1.72 | 1.15E-03 | 0.0069 |
| SETD1B           | -1.72 | 3.16E-03 | 0.0126 |
| AL590867.1       | -1.72 | 2.36E-04 | 0.0032 |
| AC139494.6       | -1.72 | 2.19E-03 | 0.0100 |
| ENST00000640719  | -1.72 | 5.06E-04 | 0.0045 |
| AKR1B15          | -1.72 | 2.91E-03 | 0.0119 |
| TRIM52-AS1       | -1.72 | 1.65E-03 | 0.0086 |
| AC009185.1       | -1.72 | 2.30E-03 | 0.0104 |
| AL356599.1       | -1.72 | 3.75E-04 | 0.0039 |
| AP001107.1       | -1.72 | 1.71E-03 | 0.0087 |
| SYNPO2           | -1.72 | 1.11E-03 | 0.0068 |
| AL355482.1       | -1.72 | 1.46E-03 | 0.0080 |
| CYB561           | -1.72 | 7.52E-03 | 0.0221 |
| NPM1P37          | -1.72 | 2.24E-02 | 0.0476 |
| OVCH1-AS1        | -1.72 | 4.78E-04 | 0.0044 |
| SLC25A25-AS1     | -1.72 | 9.00E-03 | 0.0250 |
| AC004835.1       | -1.72 | 4.79E-03 | 0.0164 |
| AC004461.2       | -1.72 | 4.18E-03 | 0.0150 |
| LINC01653        | -1.72 | 1.05E-03 | 0.0066 |
| EPHX2            | -1.73 | 2.73E-04 | 0.0034 |
| DGCR11           | -1.73 | 1.08E-03 | 0.0067 |
| PPIAL4G          | -1.73 | 2.34E-03 | 0.0105 |
| AC128685.1       | -1.73 | 2.18E-03 | 0.0100 |
| TPTE2P5          | -1.73 | 1.26E-03 | 0.0073 |
| AC138827.1       | -1.73 | 3.75E-03 | 0.0140 |
| ENST00000640720  | -1.73 | 5.89E-04 | 0.0049 |
| ST3GAL5          | -1.73 | 4.13E-04 | 0.0041 |
| AC116562.4       | -1.73 | 1.64E-02 | 0.0381 |
| CST3             | -1.73 | 1.51E-02 | 0.0359 |
| AC129510.2       | -1.73 | 1.11E-02 | 0.0288 |
| AC027544.1       | -1.73 | 8.19E-04 | 0.0058 |
| MAL              | -1.73 | 4.08E-04 | 0.0041 |
| BRWD1-IT1        | -1.73 | 7.59E-03 | 0.0223 |
| TRBV29-1         | -1.73 | 6.92E-04 | 0.0053 |
| AL512306.3       | -1.73 | 9.79E-03 | 0.0264 |
| MIR590           | -1.73 | 9.79E-03 | 0.0264 |
| AL121936.1       | -1.73 | 2.20E-03 | 0.0101 |
| AL354977.2       | -1.73 | 9.16E-03 | 0.0253 |
| C5orf56          | -1.73 | 6.28E-03 | 0.0195 |



|                 |       |          |        |
|-----------------|-------|----------|--------|
| LINC002481      | -1.73 | 1.68E-02 | 0.0388 |
| CERS6           | -1.73 | 1.78E-03 | 0.0089 |
| AC004854.2      | -1.73 | 9.39E-03 | 0.0257 |
| LINC02084       | -1.73 | 1.74E-02 | 0.0397 |
| 39508           | -1.73 | 4.10E-04 | 0.0041 |
| AL356481.2      | -1.73 | 2.27E-02 | 0.0481 |
| ZBTB18          | -1.73 | 4.99E-04 | 0.0045 |
| GRIK2           | -1.73 | 1.88E-02 | 0.0420 |
| TAS2R64P        | -1.74 | 3.37E-04 | 0.0037 |
| TNFAIP3         | -1.74 | 1.41E-04 | 0.0026 |
| PHLDB2          | -1.74 | 1.94E-03 | 0.0094 |
| AL354993.1      | -1.74 | 2.65E-03 | 0.0113 |
| ZHX2            | -1.74 | 8.62E-03 | 0.0242 |
| RN7SL619P       | -1.74 | 1.34E-02 | 0.0329 |
| AC025171.3      | -1.74 | 2.02E-02 | 0.0442 |
| AC005911.1      | -1.74 | 9.16E-03 | 0.0253 |
| SCARNA3         | -1.74 | 4.86E-03 | 0.0165 |
| SELENOM         | -1.74 | 4.25E-03 | 0.0152 |
| ENST00000640347 | -1.74 | 1.35E-04 | 0.0025 |
| LINC00562       | -1.74 | 6.69E-03 | 0.0204 |
| RF00017.10      | -1.74 | 1.74E-02 | 0.0398 |
| AC003102.1      | -1.74 | 5.60E-03 | 0.0182 |
| SCART1          | -1.74 | 7.35E-04 | 0.0055 |
| AL136526.1      | -1.74 | 4.27E-03 | 0.0152 |
| KIR3DX1         | -1.74 | 1.06E-03 | 0.0067 |
| LINC02009       | -1.74 | 8.43E-03 | 0.0239 |
| ZBTB46-AS1      | -1.74 | 4.49E-03 | 0.0157 |
| RNASET2         | -1.74 | 1.96E-03 | 0.0094 |
| TRBJ1-6         | -1.74 | 6.92E-03 | 0.0209 |
| AC138150.1      | -1.74 | 4.69E-03 | 0.0162 |
| MED13L          | -1.74 | 2.44E-04 | 0.0032 |
| AKT3            | -1.75 | 1.53E-04 | 0.0027 |
| TANC2           | -1.75 | 2.94E-03 | 0.0120 |
| KLHL3           | -1.75 | 5.79E-04 | 0.0048 |
| ABO             | -1.75 | 3.20E-03 | 0.0126 |
| SLC10A2         | -1.75 | 3.45E-03 | 0.0132 |
| NBPF2P          | -1.75 | 1.04E-03 | 0.0066 |
| PCNX2           | -1.75 | 9.44E-04 | 0.0063 |
| AC020978.5      | -1.75 | 1.79E-02 | 0.0406 |
| FSIP2           | -1.75 | 4.23E-04 | 0.0041 |
| A1CF            | -1.75 | 1.85E-02 | 0.0415 |
| RF00017.29      | -1.75 | 1.30E-02 | 0.0322 |
| MDGA1           | -1.75 | 4.49E-03 | 0.0157 |
| SERINC5         | -1.75 | 1.89E-04 | 0.0029 |
| OR56B2P         | -1.75 | 1.21E-02 | 0.0306 |
| EFCAB3          | -1.75 | 9.25E-04 | 0.0062 |
| SCARNA7         | -1.75 | 1.31E-04 | 0.0025 |

|                  |       |          |        |
|------------------|-------|----------|--------|
| FAM226B          | -1.75 | 1.77E-02 | 0.0402 |
| AC099568.2       | -1.75 | 4.94E-03 | 0.0167 |
| DNAH8            | -1.75 | 1.56E-02 | 0.0367 |
| HNF4A            | -1.75 | 1.56E-03 | 0.0083 |
| LINC02576        | -1.75 | 1.67E-02 | 0.0386 |
| AL390195.2       | -1.75 | 1.40E-03 | 0.0078 |
| AC093726.1       | -1.75 | 5.26E-03 | 0.0174 |
| ENST00000639970  | -1.75 | 4.55E-04 | 0.0043 |
| AC008752.3       | -1.76 | 5.07E-03 | 0.0170 |
| LINC02075        | -1.76 | 3.12E-03 | 0.0124 |
| DDX43            | -1.76 | 4.86E-04 | 0.0044 |
| TAS2R30          | -1.76 | 7.49E-04 | 0.0055 |
| SLC3A1           | -1.76 | 6.54E-03 | 0.0201 |
| EDA              | -1.76 | 3.03E-03 | 0.0122 |
| PPP3CA           | -1.76 | 9.48E-04 | 0.0063 |
| ATP9B            | -1.76 | 1.30E-04 | 0.0025 |
| NCF1             | -1.76 | 4.15E-03 | 0.0149 |
| RASA3            | -1.76 | 1.56E-04 | 0.0027 |
| SNORD38C         | -1.76 | 9.37E-03 | 0.0256 |
| AL162391.1       | -1.76 | 6.87E-03 | 0.0208 |
| PPIL6            | -1.76 | 1.08E-02 | 0.0282 |
| UGT1A7           | -1.76 | 7.33E-03 | 0.0217 |
| LINC02275        | -1.76 | 3.76E-03 | 0.0140 |
| LCA10            | -1.76 | 1.47E-02 | 0.0353 |
| MAML3            | -1.76 | 2.35E-03 | 0.0105 |
| RPS2P45          | -1.76 | 4.29E-03 | 0.0153 |
| MLANA            | -1.76 | 1.62E-02 | 0.0377 |
| AC125603.4       | -1.76 | 4.84E-03 | 0.0165 |
| AC092747.4       | -1.76 | 5.08E-04 | 0.0045 |
| SNORA3B          | -1.77 | 1.04E-03 | 0.0066 |
| TAC4             | -1.77 | 6.52E-04 | 0.0051 |
| AC006978.2       | -1.77 | 5.21E-04 | 0.0045 |
| ATG2A            | -1.77 | 3.42E-04 | 0.0038 |
| AC136475.3       | -1.77 | 3.93E-03 | 0.0144 |
| AL354793.1       | -1.77 | 1.71E-03 | 0.0087 |
| FAM102A          | -1.77 | 5.34E-04 | 0.0046 |
| AC019257.6       | -1.77 | 1.08E-03 | 0.0067 |
| AL138955.1       | -1.77 | 5.53E-03 | 0.0180 |
| MYCBP2-AS2       | -1.77 | 8.68E-03 | 0.0243 |
| AAK1             | -1.77 | 1.77E-03 | 0.0089 |
| FCRL3            | -1.77 | 3.39E-03 | 0.0131 |
| AC084816.1       | -1.77 | 7.66E-04 | 0.0056 |
| PRDM8            | -1.77 | 2.25E-02 | 0.0478 |
| AC100832.2       | -1.77 | 1.11E-02 | 0.0288 |
| ENST000003165090 | -1.77 | 1.08E-02 | 0.0282 |
| CC2D2A           | -1.77 | 3.61E-03 | 0.0137 |
| MC1R             | -1.77 | 9.95E-03 | 0.0266 |

|                  |       |          |        |
|------------------|-------|----------|--------|
| ENST000002399401 | -1.78 | 1.09E-02 | 0.0284 |
| MYH14            | -1.78 | 2.01E-02 | 0.0441 |
| AC016727.1       | -1.78 | 9.71E-04 | 0.0064 |
| AC106865.1       | -1.78 | 9.48E-04 | 0.0063 |
| LPAR3            | -1.78 | 7.99E-03 | 0.0231 |
| AC092111.1       | -1.78 | 1.96E-03 | 0.0094 |
| PATE4            | -1.78 | 2.82E-03 | 0.0117 |
| CAPN3            | -1.78 | 5.98E-03 | 0.0190 |
| AC007495.1       | -1.78 | 2.03E-03 | 0.0096 |
| NHLRC4           | -1.78 | 1.55E-02 | 0.0365 |
| PLEK             | -1.78 | 1.74E-03 | 0.0088 |
| LINC01206        | -1.78 | 1.02E-02 | 0.0271 |
| WFDC11           | -1.78 | 1.93E-02 | 0.0428 |
| DUSP8            | -1.78 | 9.12E-03 | 0.0252 |
| RN7SL461P        | -1.78 | 2.29E-02 | 0.0483 |
| ZFP36            | -1.78 | 2.07E-03 | 0.0097 |
| AC022826.1       | -1.78 | 1.59E-03 | 0.0084 |
| KCNH6            | -1.78 | 1.64E-02 | 0.0381 |
| RF00017.68       | -1.78 | 1.64E-02 | 0.0381 |
| ST8SIA5          | -1.78 | 1.86E-03 | 0.0092 |
| LINC01828        | -1.78 | 2.22E-03 | 0.0101 |
| ENST000003534110 | -1.78 | 1.28E-04 | 0.0025 |
| AL023755.1       | -1.79 | 9.88E-03 | 0.0265 |
| EVL              | -1.79 | 1.27E-04 | 0.0025 |
| PDCL3            | -1.79 | 3.85E-03 | 0.0142 |
| HBP1             | -1.79 | 6.02E-04 | 0.0049 |
| HTN1             | -1.79 | 1.64E-03 | 0.0085 |
| FAM229A          | -1.79 | 2.32E-02 | 0.0488 |
| LINC02062        | -1.79 | 1.01E-02 | 0.0269 |
| KCNA3            | -1.79 | 2.99E-04 | 0.0035 |
| TPM2             | -1.79 | 5.50E-03 | 0.0180 |
| SNHG22           | -1.79 | 1.41E-04 | 0.0026 |
| AL021368.1       | -1.79 | 4.59E-03 | 0.0159 |
| C3orf35          | -1.79 | 2.20E-03 | 0.0101 |
| BBS9             | -1.79 | 1.99E-03 | 0.0095 |
| AC008574.1       | -1.79 | 1.43E-03 | 0.0079 |
| LINC00865        | -1.79 | 1.28E-02 | 0.0318 |
| SMPD3            | -1.79 | 1.46E-02 | 0.0351 |
| ENST000002893610 | -1.79 | 4.40E-04 | 0.0042 |
| AC106037.1       | -1.79 | 1.47E-02 | 0.0352 |
| GABRB3           | -1.80 | 5.46E-03 | 0.0179 |
| AC084018.2       | -1.80 | 2.40E-03 | 0.0106 |
| C2orf91          | -1.80 | 3.82E-03 | 0.0141 |
| PRH1             | -1.80 | 1.02E-02 | 0.0272 |
| PABPC1P11        | -1.80 | 6.19E-03 | 0.0194 |
| ENST000003152491 | -1.80 | 3.75E-04 | 0.0039 |
| GYG1             | -1.80 | 4.91E-03 | 0.0166 |

|                  |       |          |        |
|------------------|-------|----------|--------|
| AC026316.5       | -1.80 | 1.73E-02 | 0.0395 |
| EPC1             | -1.80 | 1.34E-04 | 0.0025 |
| AL513285.1       | -1.80 | 1.94E-02 | 0.0429 |
| EFCAB13          | -1.80 | 6.02E-04 | 0.0049 |
| RF00017.26       | -1.80 | 5.98E-03 | 0.0190 |
| ABCC9            | -1.80 | 2.94E-04 | 0.0035 |
| AC025569.1       | -1.80 | 1.27E-03 | 0.0074 |
| DYRK2            | -1.80 | 1.53E-04 | 0.0027 |
| SNURF            | -1.80 | 8.68E-04 | 0.0060 |
| OR11A1           | -1.81 | 2.98E-03 | 0.0121 |
| NAIP             | -1.81 | 4.73E-04 | 0.0044 |
| ENST000003668550 | -1.81 | 1.21E-03 | 0.0072 |
| AC007389.3       | -1.81 | 7.56E-03 | 0.0222 |
| DFFBP1           | -1.81 | 1.54E-02 | 0.0363 |
| IMPG2            | -1.81 | 2.00E-03 | 0.0095 |
| SMARCE1P1        | -1.81 | 1.29E-03 | 0.0074 |
| FGFR2            | -1.81 | 1.26E-02 | 0.0315 |
| AC084706.1       | -1.81 | 1.48E-02 | 0.0355 |
| USP25            | -1.81 | 1.05E-04 | 0.0023 |
| IGSF6            | -1.81 | 2.02E-03 | 0.0096 |
| AC005064.1       | -1.81 | 5.97E-03 | 0.0190 |
| CATSPERB         | -1.81 | 7.61E-03 | 0.0223 |
| FCRL2            | -1.81 | 4.93E-03 | 0.0167 |
| AP003393.1       | -1.82 | 5.25E-03 | 0.0174 |
| AC132938.2       | -1.82 | 3.11E-03 | 0.0124 |
| BCAS3            | -1.82 | 3.78E-04 | 0.0039 |
| AC009831.1       | -1.82 | 6.24E-03 | 0.0195 |
| AC091078.1       | -1.82 | 2.27E-02 | 0.0481 |
| RORA             | -1.82 | 3.74E-04 | 0.0039 |
| SYTL1            | -1.82 | 1.57E-03 | 0.0083 |
| AC025575.2       | -1.82 | 1.63E-02 | 0.0378 |
| A1BG             | -1.82 | 1.67E-03 | 0.0086 |
| AC097376.2       | -1.82 | 2.45E-04 | 0.0032 |
| AC007256.1       | -1.82 | 1.27E-03 | 0.0073 |
| PLK2             | -1.82 | 8.89E-04 | 0.0060 |
| KLK11            | -1.82 | 8.96E-03 | 0.0249 |
| KLHL6-AS1        | -1.82 | 8.38E-03 | 0.0238 |
| TAS2R46          | -1.82 | 4.70E-03 | 0.0162 |
| ENST000002665890 | -1.82 | 2.17E-04 | 0.0031 |
| SNORD63B         | -1.82 | 5.75E-04 | 0.0048 |
| PARP15           | -1.83 | 2.67E-04 | 0.0034 |
| TMC8             | -1.83 | 1.54E-03 | 0.0082 |
| PLN              | -1.83 | 3.56E-03 | 0.0135 |
| ABLIM2           | -1.83 | 2.40E-03 | 0.0106 |
| MGAT4EP          | -1.83 | 8.71E-03 | 0.0244 |
| RN7SL596P        | -1.83 | 1.76E-02 | 0.0401 |
| GNPTAB           | -1.83 | 1.88E-03 | 0.0092 |

|                  |       |          |        |
|------------------|-------|----------|--------|
| AMZ1             | -1.83 | 8.48E-03 | 0.0240 |
| AF228730.5       | -1.83 | 8.72E-04 | 0.0060 |
| AC114760.2       | -1.83 | 1.54E-02 | 0.0363 |
| AC109992.2       | -1.83 | 2.99E-03 | 0.0121 |
| DCAF13P3         | -1.83 | 5.03E-03 | 0.0169 |
| LINC01772        | -1.83 | 8.59E-04 | 0.0059 |
| CFP              | -1.83 | 1.75E-03 | 0.0088 |
| ANKRD29          | -1.83 | 2.24E-02 | 0.0476 |
| FABP7            | -1.83 | 2.05E-02 | 0.0447 |
| JUNB             | -1.83 | 3.31E-04 | 0.0037 |
| GOPC             | -1.83 | 1.92E-02 | 0.0427 |
| AL591848.3       | -1.83 | 1.25E-02 | 0.0313 |
| USP9YP3          | -1.83 | 1.25E-02 | 0.0313 |
| PTOV1-AS1        | -1.83 | 1.17E-02 | 0.0298 |
| LINC02057        | -1.83 | 2.06E-03 | 0.0097 |
| PNPT1P1          | -1.84 | 4.89E-03 | 0.0166 |
| SARAF            | -1.84 | 1.90E-04 | 0.0029 |
| RASSF3           | -1.84 | 5.40E-04 | 0.0046 |
| AC027117.1       | -1.84 | 2.28E-02 | 0.0482 |
| OR9H1P           | -1.84 | 7.53E-03 | 0.0221 |
| PLCL2            | -1.84 | 9.64E-05 | 0.0022 |
| SORBS2           | -1.84 | 1.37E-02 | 0.0336 |
| TULP4            | -1.84 | 4.14E-04 | 0.0041 |
| OCLN             | -1.84 | 6.97E-04 | 0.0053 |
| AC005332.2       | -1.84 | 4.23E-04 | 0.0041 |
| ADAMTSL3         | -1.84 | 2.94E-04 | 0.0035 |
| DPP4             | -1.84 | 4.93E-03 | 0.0167 |
| AC048382.6       | -1.84 | 7.07E-03 | 0.0212 |
| ADGRE4P          | -1.84 | 4.64E-03 | 0.0161 |
| AL589740.1       | -1.84 | 5.03E-03 | 0.0169 |
| TRAM2            | -1.84 | 9.35E-04 | 0.0062 |
| GABRG2           | -1.84 | 3.32E-04 | 0.0037 |
| AC015911.8       | -1.84 | 1.92E-04 | 0.0029 |
| ARHGEF3          | -1.84 | 9.06E-04 | 0.0061 |
| SLC2A3           | -1.84 | 3.20E-04 | 0.0037 |
| ENST000003019233 | -1.84 | 1.71E-03 | 0.0087 |
| AC012074.1       | -1.85 | 3.35E-03 | 0.0130 |
| MOAP1            | -1.85 | 2.30E-04 | 0.0032 |
| REXO1L1P         | -1.85 | 5.46E-04 | 0.0046 |
| ENST000002618371 | -1.85 | 1.75E-03 | 0.0089 |
| AC022929.2       | -1.85 | 4.99E-03 | 0.0168 |
| RNASE6           | -1.85 | 1.97E-03 | 0.0095 |
| LINC01163        | -1.85 | 9.60E-03 | 0.0261 |
| CAPS             | -1.85 | 1.24E-03 | 0.0073 |
| KLHL24           | -1.85 | 1.95E-03 | 0.0094 |
| AC087473.1       | -1.85 | 2.67E-04 | 0.0034 |
| LEPROTL1         | -1.85 | 1.71E-04 | 0.0028 |

|                  |       |          |        |
|------------------|-------|----------|--------|
| LRRC37A2         | -1.85 | 1.45E-02 | 0.0350 |
| TRANK1           | -1.85 | 1.40E-02 | 0.0341 |
| AC009264.1       | -1.85 | 1.45E-03 | 0.0080 |
| G6PC             | -1.85 | 7.16E-03 | 0.0214 |
| AL049874.3       | -1.86 | 4.79E-04 | 0.0044 |
| JMJD7-PLA2G4B    | -1.86 | 1.84E-03 | 0.0091 |
| NUTM2D           | -1.86 | 8.73E-03 | 0.0244 |
| AC022535.1       | -1.86 | 1.27E-02 | 0.0317 |
| AL359641.1       | -1.86 | 2.65E-03 | 0.0113 |
| KDM5D            | -1.86 | 8.21E-05 | 0.0021 |
| AC092159.2       | -1.86 | 1.31E-03 | 0.0075 |
| ACTG1P3          | -1.86 | 1.09E-02 | 0.0284 |
| PCAT19           | -1.86 | 1.37E-02 | 0.0335 |
| SCN2A            | -1.86 | 1.04E-03 | 0.0066 |
| ENST00000517762  | -1.86 | 9.72E-03 | 0.0263 |
| ENST000003156842 | -1.86 | 5.04E-04 | 0.0045 |
| IGHV4-34         | -1.87 | 7.70E-03 | 0.0225 |
| ENST000002669430 | -1.87 | 6.38E-04 | 0.0051 |
| IL15             | -1.87 | 3.62E-04 | 0.0038 |
| SLC26A7          | -1.87 | 1.60E-02 | 0.0374 |
| BEND6            | -1.87 | 6.36E-04 | 0.0051 |
| LINC01873        | -1.87 | 3.99E-04 | 0.0040 |
| SLITRK5          | -1.87 | 7.57E-03 | 0.0222 |
| AL353807.3       | -1.87 | 9.92E-03 | 0.0266 |
| MIATNB           | -1.87 | 6.24E-04 | 0.0050 |
| AIDA             | -1.87 | 9.48E-03 | 0.0258 |
| PNRC1            | -1.87 | 2.80E-04 | 0.0034 |
| AL023584.2       | -1.87 | 2.65E-03 | 0.0113 |
| LINC01619        | -1.87 | 5.69E-03 | 0.0184 |
| LINC02444        | -1.88 | 1.05E-03 | 0.0066 |
| ASB4             | -1.88 | 1.02E-03 | 0.0065 |
| ENST000003171182 | -1.88 | 1.76E-03 | 0.0089 |
| AL021877.2       | -1.88 | 2.30E-03 | 0.0104 |
| SSBP2            | -1.88 | 9.70E-05 | 0.0022 |
| LINC02503        | -1.88 | 3.13E-03 | 0.0125 |
| AC243629.2       | -1.88 | 1.60E-02 | 0.0375 |
| AF001548.2       | -1.88 | 1.60E-02 | 0.0375 |
| ROR1-AS1         | -1.88 | 3.51E-04 | 0.0038 |
| SGK3             | -1.88 | 1.32E-04 | 0.0025 |
| AL671710.1       | -1.88 | 1.81E-02 | 0.0410 |
| ITGB1            | -1.88 | 6.48E-04 | 0.0051 |
| AC021092.1       | -1.88 | 4.69E-04 | 0.0043 |
| CR589904.1       | -1.88 | 1.39E-02 | 0.0338 |
| NOL4L            | -1.88 | 7.87E-04 | 0.0056 |
| TSPAN19          | -1.88 | 9.25E-03 | 0.0254 |
| SNORA38B         | -1.88 | 1.15E-02 | 0.0296 |
| MARCH6           | -1.88 | 1.12E-03 | 0.0068 |

|                  |       |          |        |
|------------------|-------|----------|--------|
| LNX1-AS2         | -1.89 | 6.85E-03 | 0.0208 |
| CA5B             | -1.89 | 2.82E-04 | 0.0035 |
| AC020907.3       | -1.89 | 5.19E-03 | 0.0173 |
| ENST000002956854 | -1.89 | 1.19E-02 | 0.0304 |
| LINC01224        | -1.89 | 1.68E-02 | 0.0388 |
| ENST000003080080 | -1.89 | 1.31E-04 | 0.0025 |
| SLC46A3          | -1.89 | 3.59E-03 | 0.0136 |
| NALCN            | -1.89 | 2.10E-02 | 0.0455 |
| AL359220.1       | -1.89 | 3.49E-04 | 0.0038 |
| POU5F1           | -1.89 | 9.33E-03 | 0.0256 |
| AC010889.1       | -1.89 | 7.54E-04 | 0.0055 |
| CRISPLD2         | -1.89 | 3.44E-03 | 0.0132 |
| AC022113.1       | -1.89 | 4.55E-03 | 0.0158 |
| FFAR2            | -1.89 | 3.10E-03 | 0.0124 |
| ENST000003212502 | -1.89 | 1.87E-04 | 0.0029 |
| AC024075.3       | -1.89 | 2.13E-02 | 0.0460 |
| AC096543.1       | -1.89 | 6.09E-03 | 0.0192 |
| LIMD2            | -1.89 | 1.27E-04 | 0.0025 |
| LINC01787        | -1.89 | 2.27E-02 | 0.0481 |
| SIGIRR           | -1.89 | 7.05E-04 | 0.0054 |
| MIR3140          | -1.89 | 1.20E-03 | 0.0071 |
| RNFT1-DT         | -1.89 | 5.11E-04 | 0.0045 |
| AC009135.1       | -1.90 | 6.62E-04 | 0.0052 |
| RNU6ATAC24P      | -1.90 | 1.15E-02 | 0.0295 |
| AC009053.2       | -1.90 | 7.55E-03 | 0.0222 |
| ENST000002730090 | -1.90 | 1.13E-02 | 0.0292 |
| LRRC37A5P        | -1.90 | 1.51E-02 | 0.0359 |
| AC090425.2       | -1.90 | 1.55E-02 | 0.0365 |
| TIAF1            | -1.90 | 1.15E-03 | 0.0070 |
| PPARGC1A         | -1.90 | 1.74E-02 | 0.0398 |
| ZFP14            | -1.90 | 1.39E-03 | 0.0077 |
| TAS2R43          | -1.90 | 1.33E-03 | 0.0075 |
| AP000959.1       | -1.90 | 2.38E-03 | 0.0106 |
| GPRIN3           | -1.90 | 1.35E-04 | 0.0025 |
| RABGAP1L-IT1     | -1.90 | 1.08E-03 | 0.0067 |
| AC027612.2       | -1.90 | 1.34E-03 | 0.0076 |
| AP001992.1       | -1.90 | 1.04E-03 | 0.0066 |
| ARRDC4           | -1.90 | 2.24E-03 | 0.0102 |
| CTSO             | -1.90 | 2.01E-03 | 0.0096 |
| CADM2-AS1        | -1.90 | 1.48E-03 | 0.0080 |
| AC114980.1       | -1.90 | 7.31E-04 | 0.0055 |
| AC006238.1       | -1.90 | 1.15E-02 | 0.0295 |
| AC017002.5       | -1.90 | 1.84E-03 | 0.0091 |
| HLA-V            | -1.91 | 1.73E-03 | 0.0088 |
| CPED1            | -1.91 | 6.26E-03 | 0.0195 |
| LTB              | -1.91 | 1.60E-02 | 0.0374 |
| PDE3B            | -1.91 | 1.15E-04 | 0.0024 |

|                  |       |          |        |
|------------------|-------|----------|--------|
| SMCHD1           | -1.91 | 7.09E-05 | 0.0019 |
| LINC01578        | -1.91 | 8.47E-05 | 0.0021 |
| AC099063.4       | -1.91 | 3.77E-03 | 0.0140 |
| BPTFP1           | -1.91 | 4.89E-03 | 0.0166 |
| PCDHB13          | -1.91 | 5.25E-03 | 0.0174 |
| ADAM12           | -1.91 | 5.80E-03 | 0.0186 |
| SLC47A1          | -1.91 | 1.09E-02 | 0.0285 |
| NWD1             | -1.91 | 9.73E-03 | 0.0263 |
| BX248409.1       | -1.91 | 2.34E-02 | 0.0491 |
| AC079807.1       | -1.91 | 8.66E-03 | 0.0243 |
| AL133243.3       | -1.91 | 1.35E-04 | 0.0025 |
| KLRK1            | -1.91 | 1.65E-03 | 0.0085 |
| LINC02035        | -1.91 | 2.61E-03 | 0.0112 |
| SERPINB9P1       | -1.91 | 7.26E-04 | 0.0054 |
| AC139494.2       | -1.92 | 6.95E-04 | 0.0053 |
| AP002026.1       | -1.92 | 1.26E-03 | 0.0073 |
| SOX2-OT          | -1.92 | 5.62E-03 | 0.0182 |
| HDC              | -1.92 | 5.85E-03 | 0.0187 |
| ZNF394           | -1.92 | 1.06E-04 | 0.0023 |
| MEGF9            | -1.92 | 2.15E-04 | 0.0031 |
| CXCL16           | -1.92 | 2.02E-03 | 0.0096 |
| EMX2             | -1.92 | 1.13E-02 | 0.0291 |
| KCNE4            | -1.92 | 4.73E-03 | 0.0163 |
| PDE7A            | -1.92 | 6.11E-04 | 0.0050 |
| LINC01299        | -1.92 | 7.99E-03 | 0.0231 |
| C5AR2            | -1.93 | 6.69E-04 | 0.0052 |
| AP001011.1       | -1.93 | 3.08E-03 | 0.0123 |
| RF00019.227      | -1.93 | 1.59E-02 | 0.0373 |
| CXXC5            | -1.93 | 9.49E-03 | 0.0259 |
| LINC01531        | -1.93 | 1.06E-02 | 0.0279 |
| AC090377.1       | -1.93 | 9.88E-03 | 0.0265 |
| ENST000002472262 | -1.93 | 1.88E-03 | 0.0092 |
| SNRK             | -1.93 | 2.26E-04 | 0.0031 |
| LL22NC03-63E9.3  | -1.93 | 1.67E-03 | 0.0086 |
| LGR4             | -1.93 | 1.43E-03 | 0.0079 |
| TRBV19           | -1.93 | 1.74E-03 | 0.0088 |
| NONOP2           | -1.93 | 2.23E-02 | 0.0474 |
| AC127002.1       | -1.93 | 1.67E-02 | 0.0386 |
| AC116158.1       | -1.93 | 9.85E-04 | 0.0064 |
| PEG13            | -1.93 | 1.07E-03 | 0.0067 |
| AC048341.1       | -1.93 | 5.45E-04 | 0.0046 |
| WHAMMP3          | -1.93 | 1.67E-04 | 0.0028 |
| ACAP2-IT1        | -1.94 | 5.26E-04 | 0.0046 |
| AC243651.1       | -1.94 | 1.72E-02 | 0.0394 |
| PDCL3P4          | -1.94 | 1.75E-03 | 0.0089 |
| AC010168.1       | -1.94 | 3.02E-03 | 0.0122 |
| AP003486.1       | -1.94 | 8.09E-04 | 0.0057 |



|                       |       |          |        |
|-----------------------|-------|----------|--------|
| ATXN7L1               | -1.94 | 1.63E-04 | 0.0027 |
| SYCP1                 | -1.94 | 7.04E-04 | 0.0054 |
| AL356801.1            | -1.94 | 2.02E-03 | 0.0096 |
| AL355336.1            | -1.94 | 1.57E-02 | 0.0370 |
| IGFL4                 | -1.94 | 9.51E-04 | 0.0063 |
| AL139407.1            | -1.94 | 6.07E-04 | 0.0049 |
| P2RY14                | -1.94 | 1.10E-03 | 0.0068 |
| AC096921.2            | -1.94 | 3.59E-04 | 0.0038 |
| AC020663.3            | -1.94 | 5.71E-04 | 0.0048 |
| AC127024.4            | -1.94 | 1.41E-02 | 0.0343 |
| EPC2                  | -1.94 | 2.12E-04 | 0.0031 |
| LAMA2                 | -1.94 | 5.41E-03 | 0.0178 |
| RN7SL670P             | -1.95 | 1.98E-02 | 0.0435 |
| PRKG1-AS1             | -1.95 | 4.93E-03 | 0.0167 |
| FHIT                  | -1.95 | 3.86E-04 | 0.0040 |
| AC015819.1            | -1.95 | 2.07E-03 | 0.0097 |
| AC011297.1            | -1.95 | 9.62E-03 | 0.0261 |
| AC245078.3            | -1.95 | 1.68E-03 | 0.0086 |
| EPS15P1               | -1.95 | 2.05E-02 | 0.0447 |
| AC005332.5            | -1.95 | 7.79E-04 | 0.0056 |
| OR8A1                 | -1.95 | 3.42E-04 | 0.0038 |
| LINC01483             | -1.95 | 9.30E-03 | 0.0255 |
| AC009227.1            | -1.95 | 9.39E-04 | 0.0063 |
| AC004672.2            | -1.95 | 1.12E-02 | 0.0291 |
| AC087392.3            | -1.95 | 4.53E-03 | 0.0158 |
| SHANK1                | -1.95 | 1.97E-02 | 0.0434 |
| AL512306.2            | -1.95 | 2.02E-03 | 0.0096 |
| VMAC                  | -1.95 | 3.97E-04 | 0.0040 |
| PLXNC1                | -1.96 | 1.32E-03 | 0.0075 |
| RF00017.146           | -1.96 | 9.49E-03 | 0.0259 |
| AC022182.1            | -1.96 | 5.02E-03 | 0.0169 |
| RF00019.655           | -1.96 | 5.42E-03 | 0.0178 |
| LINC02108             | -1.96 | 8.07E-04 | 0.0057 |
| CD101                 | -1.96 | 5.73E-03 | 0.0185 |
| COL28A1               | -1.96 | 6.65E-03 | 0.0203 |
| PHF1                  | -1.96 | 5.22E-04 | 0.0045 |
| AC002451.1            | -1.96 | 1.84E-02 | 0.0415 |
| AC008869.1            | -1.96 | 1.13E-02 | 0.0293 |
| AL022310.1            | -1.96 | 8.40E-04 | 0.0058 |
| CCNB3P1               | -1.96 | 1.76E-02 | 0.0401 |
| LINC00869             | -1.96 | 1.85E-03 | 0.0091 |
| AC011825.3            | -1.96 | 2.08E-03 | 0.0097 |
| SKOR1                 | -1.96 | 9.52E-03 | 0.0259 |
| ARHGAP27P1-BPTFP1-KPN | -1.96 | 5.72E-03 | 0.0184 |
| AL356776.1            | -1.96 | 6.44E-04 | 0.0051 |
| PDP1                  | -1.96 | 1.58E-04 | 0.0027 |
| CACNA1C-AS2           | -1.96 | 2.92E-03 | 0.0119 |

|             |       |          |        |
|-------------|-------|----------|--------|
| GIMAP1      | -1.96 | 1.16E-03 | 0.0070 |
| SEC14L6     | -1.97 | 8.54E-04 | 0.0059 |
| BCORP1      | -1.97 | 3.33E-03 | 0.0130 |
| LINC01205   | -1.97 | 2.20E-03 | 0.0101 |
| SOX9-AS1    | -1.97 | 1.78E-03 | 0.0089 |
| SCARNA21    | -1.97 | 7.41E-05 | 0.0020 |
| AC110792.3  | -1.97 | 1.28E-02 | 0.0320 |
| AC135068.8  | -1.97 | 7.86E-03 | 0.0228 |
| IGHV1OR15-1 | -1.97 | 7.86E-03 | 0.0228 |
| AC083949.1  | -1.97 | 1.24E-02 | 0.0312 |
| RF00019.710 | -1.97 | 1.24E-02 | 0.0312 |
| AC068587.4  | -1.97 | 9.50E-05 | 0.0022 |
| STK38       | -1.97 | 1.30E-04 | 0.0025 |
| CYP4F8      | -1.97 | 4.40E-04 | 0.0042 |
| PLEKHA1     | -1.97 | 1.70E-04 | 0.0028 |
| XYLT1       | -1.97 | 4.36E-04 | 0.0042 |
| AL354941.1  | -1.98 | 9.66E-03 | 0.0262 |
| AC009041.2  | -1.98 | 1.07E-03 | 0.0067 |
| SLC44A5     | -1.98 | 3.41E-03 | 0.0131 |
| MECOM       | -1.98 | 3.10E-03 | 0.0124 |
| ALDH3B1     | -1.98 | 4.17E-04 | 0.0041 |
| ADCY10P1    | -1.98 | 1.33E-03 | 0.0075 |
| NEK10       | -1.98 | 2.58E-03 | 0.0111 |
| TRPM8       | -1.98 | 1.42E-03 | 0.0078 |
| AL365204.2  | -1.98 | 1.78E-02 | 0.0404 |
| AC079684.1  | -1.98 | 3.28E-03 | 0.0128 |
| SKINT1L     | -1.98 | 1.25E-03 | 0.0073 |
| AC004039.1  | -1.98 | 2.58E-03 | 0.0111 |
| RF00019.145 | -1.98 | 8.66E-04 | 0.0060 |
| DCN         | -1.98 | 4.33E-03 | 0.0154 |
| SYT17       | -1.98 | 1.85E-02 | 0.0416 |
| RNU6-838P   | -1.98 | 1.26E-02 | 0.0315 |
| AC018645.2  | -1.98 | 2.10E-02 | 0.0455 |
| LINC02260   | -1.98 | 1.40E-02 | 0.0340 |
| AC005070.3  | -1.99 | 3.21E-03 | 0.0127 |
| LINC00891   | -1.99 | 3.61E-04 | 0.0038 |
| CASS4       | -1.99 | 3.31E-03 | 0.0129 |
| LAMC2       | -1.99 | 1.52E-02 | 0.0361 |
| AHNAK       | -1.99 | 4.50E-05 | 0.0016 |
| AC006369.1  | -1.99 | 9.56E-04 | 0.0063 |
| AP000766.1  | -1.99 | 5.47E-04 | 0.0046 |
| HSPE1P3     | -1.99 | 6.22E-03 | 0.0194 |
| KIF13A      | -1.99 | 1.27E-02 | 0.0317 |
| RF01241.1   | -1.99 | 3.79E-03 | 0.0141 |
| AC007728.2  | -1.99 | 4.46E-03 | 0.0156 |
| KLB         | -1.99 | 7.15E-03 | 0.0213 |
| RASGRF2     | -2.00 | 1.56E-03 | 0.0083 |

|                  |       |          |        |
|------------------|-------|----------|--------|
| AC008079.1       | -2.00 | 4.97E-04 | 0.0045 |
| SHISAL2A         | -2.00 | 4.37E-04 | 0.0042 |
| MYLK             | -2.00 | 2.24E-02 | 0.0477 |
| SCN9A            | -2.00 | 2.47E-03 | 0.0108 |
| TRDMT1           | -2.00 | 1.43E-04 | 0.0026 |
| AL359752.1       | -2.00 | 8.45E-04 | 0.0059 |
| SULT1B1          | -2.00 | 2.40E-04 | 0.0032 |
| GYG2P1           | -2.00 | 2.32E-03 | 0.0104 |
| CDC20B           | -2.00 | 8.83E-03 | 0.0246 |
| KDM5C-IT1        | -2.00 | 5.79E-03 | 0.0186 |
| AC009065.5       | -2.00 | 9.19E-03 | 0.0253 |
| TOB1             | -2.00 | 1.43E-04 | 0.0026 |
| CGRRF1           | -2.00 | 3.09E-03 | 0.0124 |
| SNORD59A         | -2.01 | 1.39E-02 | 0.0339 |
| SNORA54          | -2.01 | 2.75E-03 | 0.0115 |
| ALDH1L1          | -2.01 | 1.64E-02 | 0.0381 |
| CCDC7            | -2.01 | 3.74E-04 | 0.0039 |
| LINC01307        | -2.01 | 1.13E-02 | 0.0291 |
| SF3B1            | -2.01 | 7.83E-05 | 0.0020 |
| TXLNB            | -2.01 | 3.46E-03 | 0.0133 |
| AL513548.1       | -2.01 | 7.30E-03 | 0.0217 |
| ENST000002609081 | -2.01 | 1.11E-04 | 0.0023 |
| AP002812.5       | -2.01 | 2.14E-03 | 0.0099 |
| AC006042.3       | -2.01 | 4.55E-04 | 0.0043 |
| RC3H1-IT1        | -2.01 | 1.08E-03 | 0.0067 |
| AC006333.2       | -2.01 | 9.23E-04 | 0.0062 |
| CYP4V2           | -2.01 | 1.34E-03 | 0.0076 |
| SNORD17          | -2.01 | 7.66E-05 | 0.0020 |
| RF00017.74       | -2.01 | 7.50E-03 | 0.0221 |
| CD55             | -2.01 | 2.04E-03 | 0.0096 |
| PDXDC2P          | -2.01 | 1.02E-03 | 0.0065 |
| LINC01410        | -2.02 | 3.02E-03 | 0.0122 |
| PHYHD1           | -2.02 | 5.76E-03 | 0.0185 |
| AL356019.2       | -2.02 | 1.80E-03 | 0.0090 |
| RNU6-118P        | -2.02 | 1.51E-02 | 0.0359 |
| PATJ             | -2.02 | 3.44E-04 | 0.0038 |
| PSMA3-AS1        | -2.02 | 1.45E-04 | 0.0026 |
| LINC00355        | -2.03 | 5.03E-03 | 0.0169 |
| AC090220.1       | -2.03 | 4.05E-03 | 0.0147 |
| SCARNA6          | -2.03 | 7.52E-05 | 0.0020 |
| B3GAT1           | -2.03 | 1.15E-03 | 0.0070 |
| FAM214A          | -2.03 | 4.19E-04 | 0.0041 |
| C20orf203        | -2.03 | 4.98E-03 | 0.0168 |
| VAC14-AS1        | -2.03 | 1.15E-03 | 0.0069 |
| AC108751.4       | -2.03 | 4.89E-03 | 0.0166 |
| LINC01145        | -2.03 | 1.14E-04 | 0.0024 |
| MYLK4            | -2.03 | 1.66E-03 | 0.0086 |

|                  |       |          |        |
|------------------|-------|----------|--------|
| PLD5             | -2.04 | 1.14E-02 | 0.0293 |
| SCARNA10         | -2.04 | 5.22E-05 | 0.0017 |
| KCNH2            | -2.04 | 8.77E-03 | 0.0245 |
| MGC16275         | -2.04 | 1.14E-02 | 0.0294 |
| RF00017.174      | -2.04 | 8.72E-03 | 0.0244 |
| NFKBIZ           | -2.04 | 1.40E-04 | 0.0026 |
| AC012085.2       | -2.04 | 5.27E-03 | 0.0174 |
| AC241520.1       | -2.04 | 1.26E-02 | 0.0316 |
| AC020659.1       | -2.04 | 5.82E-03 | 0.0187 |
| AC079781.5       | -2.04 | 3.20E-04 | 0.0037 |
| SCARB2           | -2.04 | 1.32E-04 | 0.0025 |
| AC135050.5       | -2.04 | 6.07E-03 | 0.0192 |
| AC009133.3       | -2.04 | 3.16E-03 | 0.0125 |
| AC103740.1       | -2.05 | 6.45E-04 | 0.0051 |
| ACCS             | -2.05 | 6.30E-04 | 0.0050 |
| TLE4             | -2.05 | 9.96E-05 | 0.0022 |
| AC001226.1       | -2.05 | 1.14E-02 | 0.0293 |
| RSF1-IT2         | -2.05 | 2.82E-03 | 0.0117 |
| MAPK8IP2         | -2.05 | 1.45E-02 | 0.0349 |
| SLC24A4          | -2.05 | 1.88E-02 | 0.0420 |
| THSD1            | -2.05 | 3.43E-03 | 0.0132 |
| AL353803.1       | -2.05 | 3.55E-03 | 0.0135 |
| AL138479.1       | -2.05 | 2.24E-03 | 0.0102 |
| ENST000002272140 | -2.05 | 1.27E-03 | 0.0073 |
| AL669942.1       | -2.05 | 5.91E-03 | 0.0188 |
| SYTL2            | -2.05 | 6.97E-04 | 0.0053 |
| ASAP1-IT2        | -2.05 | 4.52E-03 | 0.0158 |
| AC109927.2       | -2.05 | 2.21E-02 | 0.0471 |
| ACSS3            | -2.05 | 1.12E-02 | 0.0291 |
| ZNF10            | -2.05 | 5.83E-04 | 0.0048 |
| AC006064.2       | -2.05 | 5.03E-03 | 0.0169 |
| PBX1             | -2.05 | 2.65E-03 | 0.0113 |
| CADM1            | -2.05 | 1.46E-03 | 0.0080 |
| AC134349.1       | -2.05 | 2.56E-03 | 0.0111 |
| AC134349.4       | -2.05 | 2.56E-03 | 0.0111 |
| AC245078.2       | -2.05 | 2.56E-03 | 0.0111 |
| AL117692.1       | -2.05 | 4.04E-03 | 0.0147 |
| CACNG3           | -2.06 | 1.14E-02 | 0.0294 |
| PTCH1            | -2.06 | 3.17E-03 | 0.0126 |
| AC007923.2       | -2.06 | 7.90E-03 | 0.0229 |
| LINC00221        | -2.06 | 2.60E-04 | 0.0033 |
| IRGM             | -2.06 | 1.96E-03 | 0.0094 |
| AL031283.1       | -2.06 | 1.93E-03 | 0.0094 |
| ADGRG2           | -2.06 | 1.39E-02 | 0.0339 |
| MEOX1            | -2.06 | 1.77E-02 | 0.0402 |
| AC006262.1       | -2.06 | 3.79E-03 | 0.0141 |
| AC090398.1       | -2.06 | 1.17E-02 | 0.0298 |

|                  |       |          |        |
|------------------|-------|----------|--------|
| RF00017.41       | -2.06 | 9.73E-04 | 0.0064 |
| AC245297.2       | -2.06 | 2.87E-03 | 0.0118 |
| LRRK1            | -2.06 | 4.39E-04 | 0.0042 |
| AL161785.1       | -2.06 | 3.51E-03 | 0.0134 |
| AC009704.2       | -2.06 | 1.19E-02 | 0.0303 |
| AC105265.3       | -2.06 | 1.02E-02 | 0.0271 |
| AP001381.1       | -2.06 | 3.69E-03 | 0.0139 |
| TP53INP2         | -2.06 | 7.44E-04 | 0.0055 |
| OR2L2            | -2.06 | 1.79E-03 | 0.0090 |
| TGFBR3           | -2.07 | 2.64E-03 | 0.0113 |
| STK31            | -2.07 | 2.88E-03 | 0.0118 |
| CASTOR3          | -2.07 | 6.29E-04 | 0.0050 |
| LINC02245        | -2.07 | 6.55E-03 | 0.0201 |
| SAMD12           | -2.07 | 2.92E-04 | 0.0035 |
| TRABD2A          | -2.07 | 2.75E-04 | 0.0034 |
| RF02271.12       | -2.07 | 8.60E-04 | 0.0059 |
| HLA-DPB1         | -2.07 | 9.78E-05 | 0.0022 |
| AL133330.1       | -2.07 | 7.43E-04 | 0.0055 |
| RF02271.32       | -2.07 | 2.18E-03 | 0.0100 |
| TNRC6C           | -2.07 | 1.22E-04 | 0.0025 |
| AC245297.3       | -2.07 | 1.28E-04 | 0.0025 |
| SYNE1            | -2.07 | 1.45E-04 | 0.0026 |
| LIX1             | -2.07 | 3.33E-03 | 0.0130 |
| AC027020.2       | -2.07 | 5.08E-04 | 0.0045 |
| POTEC            | -2.08 | 1.90E-03 | 0.0093 |
| AP002884.1       | -2.08 | 3.18E-04 | 0.0037 |
| VAV3             | -2.08 | 8.57E-04 | 0.0059 |
| AC240274.1       | -2.08 | 2.04E-02 | 0.0445 |
| LINC00347        | -2.08 | 1.85E-03 | 0.0091 |
| PDCD4-AS1        | -2.08 | 9.57E-04 | 0.0063 |
| AC025171.2       | -2.08 | 4.38E-04 | 0.0042 |
| GPR18            | -2.08 | 6.53E-03 | 0.0201 |
| RF00019.112      | -2.08 | 4.71E-03 | 0.0162 |
| AC092653.1       | -2.08 | 7.02E-03 | 0.0211 |
| ACTA2-AS1        | -2.08 | 4.11E-04 | 0.0041 |
| AC104964.2       | -2.08 | 2.44E-03 | 0.0108 |
| AF279873.3       | -2.09 | 2.73E-03 | 0.0115 |
| FAM209A          | -2.09 | 9.19E-03 | 0.0253 |
| AC055822.1       | -2.09 | 4.86E-04 | 0.0044 |
| ENST000003563220 | -2.09 | 1.66E-03 | 0.0086 |
| FBXO3            | -2.09 | 5.69E-05 | 0.0017 |
| AKR1C1           | -2.09 | 1.45E-03 | 0.0079 |
| SPP2             | -2.09 | 4.55E-03 | 0.0158 |
| FTH1             | -2.09 | 1.40E-04 | 0.0026 |
| LINC02006        | -2.09 | 4.32E-03 | 0.0153 |
| ANP32AP1         | -2.09 | 2.06E-02 | 0.0448 |
| AC008555.5       | -2.10 | 7.85E-04 | 0.0056 |

|                  |       |          |        |
|------------------|-------|----------|--------|
| TCEANC           | -2.10 | 8.49E-04 | 0.0059 |
| STX16-NPEPL1     | -2.10 | 1.59E-03 | 0.0084 |
| AL049840.1       | -2.10 | 3.63E-03 | 0.0137 |
| CDH8             | -2.10 | 4.27E-03 | 0.0152 |
| USP36            | -2.10 | 9.08E-04 | 0.0061 |
| LINC00476        | -2.10 | 1.46E-03 | 0.0080 |
| MSX1             | -2.10 | 1.41E-02 | 0.0341 |
| HAMP             | -2.10 | 1.28E-03 | 0.0074 |
| ENST00000602493  | -2.10 | 9.23E-03 | 0.0254 |
| AL031848.2       | -2.10 | 1.15E-02 | 0.0295 |
| TLR4             | -2.10 | 1.15E-02 | 0.0295 |
| COL6A1           | -2.10 | 1.13E-02 | 0.0293 |
| SNX29P1          | -2.10 | 2.75E-03 | 0.0116 |
| ENST00000471810  | -2.10 | 1.72E-03 | 0.0087 |
| RF00019.541      | -2.11 | 1.16E-02 | 0.0297 |
| POU5F2           | -2.11 | 1.97E-04 | 0.0030 |
| AC073957.3       | -2.11 | 8.70E-04 | 0.0060 |
| AL162578.1       | -2.11 | 1.89E-03 | 0.0093 |
| MAP3K1           | -2.11 | 5.60E-05 | 0.0017 |
| AL035446.1       | -2.11 | 8.78E-03 | 0.0245 |
| AC002553.2       | -2.11 | 4.35E-04 | 0.0042 |
| CCDC120          | -2.11 | 5.15E-03 | 0.0172 |
| AC087239.1       | -2.11 | 1.69E-02 | 0.0389 |
| AC011939.1       | -2.11 | 1.75E-04 | 0.0028 |
| AP003086.1       | -2.11 | 1.42E-03 | 0.0078 |
| ENST000003474660 | -2.11 | 2.01E-03 | 0.0096 |
| LINC00513        | -2.12 | 1.68E-02 | 0.0388 |
| ANKRD26P4        | -2.12 | 5.07E-03 | 0.0170 |
| DLEC1            | -2.12 | 5.23E-04 | 0.0045 |
| MFGE8            | -2.12 | 5.22E-04 | 0.0045 |
| AL355997.1       | -2.12 | 2.43E-03 | 0.0107 |
| ZNF781           | -2.12 | 2.74E-04 | 0.0034 |
| PAG1             | -2.12 | 9.46E-04 | 0.0063 |
| PLCB1            | -2.12 | 4.75E-04 | 0.0044 |
| EYS              | -2.12 | 3.13E-03 | 0.0125 |
| GAB1             | -2.12 | 5.64E-03 | 0.0183 |
| RGS17            | -2.12 | 5.04E-04 | 0.0045 |
| FBLIM1           | -2.12 | 2.59E-03 | 0.0111 |
| LINC02520        | -2.12 | 5.58E-04 | 0.0047 |
| ERMN             | -2.12 | 2.44E-04 | 0.0032 |
| MGC4859          | -2.12 | 8.42E-03 | 0.0238 |
| RPL21P123        | -2.12 | 2.58E-03 | 0.0111 |
| IDUA             | -2.12 | 4.38E-03 | 0.0155 |
| TRGC2            | -2.13 | 5.90E-04 | 0.0049 |
| ENST000003035210 | -2.13 | 1.36E-03 | 0.0076 |
| AC022819.1       | -2.13 | 7.21E-04 | 0.0054 |
| AC007216.3       | -2.13 | 4.76E-04 | 0.0044 |

|                  |       |          |        |
|------------------|-------|----------|--------|
| UTRN             | -2.13 | 3.99E-04 | 0.0040 |
| PBXIP1           | -2.13 | 7.55E-05 | 0.0020 |
| CPQ              | -2.13 | 2.93E-04 | 0.0035 |
| RN7SL592P        | -2.13 | 1.86E-02 | 0.0417 |
| OCLNP1           | -2.13 | 1.22E-02 | 0.0309 |
| ATP2B1-AS1       | -2.13 | 2.06E-02 | 0.0449 |
| ENST000003088240 | -2.13 | 2.18E-04 | 0.0031 |
| AL139393.2       | -2.14 | 9.20E-03 | 0.0253 |
| RF00017.200      | -2.14 | 1.63E-03 | 0.0085 |
| ENST000002574970 | -2.14 | 6.35E-05 | 0.0019 |
| ARHGAP12         | -2.14 | 7.22E-05 | 0.0020 |
| AC018554.1       | -2.14 | 7.03E-04 | 0.0054 |
| PRDM5            | -2.14 | 5.43E-04 | 0.0046 |
| EPHA1            | -2.14 | 3.44E-04 | 0.0038 |
| RGPD5            | -2.14 | 9.17E-04 | 0.0062 |
| ENST000003356700 | -2.14 | 2.41E-04 | 0.0032 |
| AC027288.3       | -2.14 | 1.22E-03 | 0.0072 |
| GPR183           | -2.14 | 1.24E-03 | 0.0073 |
| IGHV3-37         | -2.14 | 2.51E-03 | 0.0110 |
| AL139424.3       | -2.15 | 8.81E-03 | 0.0246 |
| AC005912.1       | -2.15 | 1.00E-02 | 0.0267 |
| ADRB2            | -2.15 | 1.53E-03 | 0.0082 |
| AP001330.1       | -2.15 | 3.42E-04 | 0.0038 |
| BBS2             | -2.15 | 3.69E-04 | 0.0039 |
| GAS7             | -2.15 | 4.94E-04 | 0.0044 |
| HLA-DMB          | -2.15 | 6.59E-04 | 0.0052 |
| LINC00336        | -2.15 | 6.76E-03 | 0.0206 |
| ENST000002778740 | -2.15 | 2.81E-03 | 0.0117 |
| RGS17P1          | -2.15 | 5.10E-03 | 0.0171 |
| LDLRAP1          | -2.15 | 2.50E-04 | 0.0033 |
| ENST000002960881 | -2.16 | 4.42E-05 | 0.0016 |
| ATF4P3           | -2.16 | 5.25E-03 | 0.0174 |
| PABPC1P3         | -2.16 | 5.73E-04 | 0.0048 |
| AC127024.6       | -2.16 | 9.68E-03 | 0.0262 |
| LCTL             | -2.16 | 2.57E-03 | 0.0111 |
| C1GALT1P1        | -2.16 | 4.10E-03 | 0.0148 |
| SAMD9            | -2.16 | 2.24E-03 | 0.0102 |
| AC073569.3       | -2.16 | 4.80E-04 | 0.0044 |
| USP46            | -2.16 | 7.18E-05 | 0.0020 |
| CLC              | -2.16 | 9.25E-03 | 0.0254 |
| RF00413.1        | -2.16 | 2.55E-03 | 0.0111 |
| ACSM1            | -2.16 | 1.82E-02 | 0.0411 |
| RF00017.62       | -2.16 | 7.77E-03 | 0.0226 |
| KIAA1551         | -2.17 | 5.40E-05 | 0.0017 |
| OMA1             | -2.17 | 7.62E-05 | 0.0020 |
| KCNMB1           | -2.17 | 8.07E-04 | 0.0057 |
| ZNF276           | -2.17 | 5.27E-05 | 0.0017 |

|                  |       |          |        |
|------------------|-------|----------|--------|
| MIR22HG          | -2.17 | 5.36E-04 | 0.0046 |
| VPS9D1           | -2.17 | 9.45E-04 | 0.0063 |
| SLC2A5           | -2.17 | 6.70E-04 | 0.0052 |
| RNU6-82P         | -2.17 | 3.98E-04 | 0.0040 |
| ARRDC2           | -2.17 | 1.51E-04 | 0.0026 |
| RNU6-807P        | -2.17 | 6.21E-03 | 0.0194 |
| AC017081.3       | -2.17 | 2.09E-03 | 0.0098 |
| AL513412.1       | -2.17 | 2.19E-03 | 0.0100 |
| AC048382.5       | -2.18 | 4.01E-03 | 0.0146 |
| Z94721.1         | -2.18 | 6.20E-03 | 0.0194 |
| SPAG8            | -2.18 | 6.91E-03 | 0.0209 |
| ENST000003176333 | -2.18 | 1.43E-03 | 0.0079 |
| MAGI2-AS3        | -2.18 | 4.34E-03 | 0.0154 |
| C1QTNF3          | -2.18 | 1.67E-04 | 0.0028 |
| AL135905.2       | -2.18 | 2.61E-04 | 0.0033 |
| SULT1C2          | -2.18 | 9.03E-04 | 0.0061 |
| AC002094.2       | -2.18 | 3.07E-03 | 0.0123 |
| AC122718.1       | -2.19 | 5.15E-04 | 0.0045 |
| PNPLA2           | -2.19 | 2.90E-03 | 0.0119 |
| GABRG3           | -2.19 | 5.02E-03 | 0.0169 |
| LMO7             | -2.19 | 2.74E-04 | 0.0034 |
| LINC01252        | -2.19 | 6.14E-03 | 0.0193 |
| AC016708.1       | -2.19 | 1.54E-04 | 0.0027 |
| CASP17P          | -2.19 | 3.08E-04 | 0.0036 |
| ITM2B            | -2.19 | 5.15E-05 | 0.0017 |
| SNORD89          | -2.19 | 2.46E-04 | 0.0032 |
| AL591926.7       | -2.19 | 3.24E-04 | 0.0037 |
| UCKL1-AS1        | -2.19 | 7.76E-03 | 0.0226 |
| KLF12            | -2.19 | 4.41E-04 | 0.0042 |
| SNORA19          | -2.19 | 4.99E-04 | 0.0045 |
| AC118344.1       | -2.20 | 8.66E-03 | 0.0243 |
| AC025031.3       | -2.20 | 1.76E-02 | 0.0400 |
| RN7SL50P         | -2.20 | 2.31E-02 | 0.0487 |
| AC009495.2       | -2.20 | 7.35E-03 | 0.0218 |
| SPON1            | -2.20 | 9.63E-04 | 0.0063 |
| ELOCP19          | -2.21 | 3.29E-03 | 0.0129 |
| AC073111.5       | -2.21 | 7.94E-04 | 0.0057 |
| AKR1C2           | -2.21 | 1.67E-03 | 0.0086 |
| KRT17P7          | -2.21 | 8.23E-03 | 0.0235 |
| RF00017.114      | -2.21 | 1.61E-02 | 0.0376 |
| NOSTRIN          | -2.21 | 4.87E-03 | 0.0166 |
| SLC4A4           | -2.21 | 5.75E-03 | 0.0185 |
| TLR7             | -2.21 | 5.92E-03 | 0.0189 |
| PDE4B            | -2.21 | 1.95E-04 | 0.0030 |
| AL360169.2       | -2.22 | 1.23E-03 | 0.0072 |
| AC011939.2       | -2.22 | 2.53E-03 | 0.0110 |
| RPL11P3          | -2.22 | 9.72E-04 | 0.0064 |



|                  |       |          |        |
|------------------|-------|----------|--------|
| C1DP5            | -2.22 | 3.48E-03 | 0.0133 |
| AC015911.4       | -2.22 | 2.76E-03 | 0.0116 |
| ARRDC3           | -2.22 | 4.30E-03 | 0.0153 |
| AC090589.3       | -2.22 | 1.22E-02 | 0.0308 |
| AC008555.1       | -2.23 | 1.62E-02 | 0.0377 |
| SLC4A5           | -2.23 | 5.16E-04 | 0.0045 |
| RN7SL618P        | -2.23 | 7.26E-03 | 0.0216 |
| AC034236.2       | -2.23 | 1.56E-03 | 0.0083 |
| AC126389.1       | -2.23 | 5.19E-03 | 0.0173 |
| PCSK5            | -2.23 | 1.28E-02 | 0.0320 |
| AC006305.1       | -2.23 | 7.27E-03 | 0.0216 |
| ENST000002814710 | -2.23 | 5.82E-04 | 0.0048 |
| AP000842.1       | -2.23 | 2.37E-02 | 0.0495 |
| AC089998.3       | -2.23 | 2.20E-02 | 0.0470 |
| ITGB2-AS1        | -2.23 | 4.17E-04 | 0.0041 |
| C17orf107        | -2.23 | 1.79E-03 | 0.0090 |
| ENST000003615440 | -2.23 | 3.40E-03 | 0.0131 |
| ACVR2A           | -2.23 | 1.07E-03 | 0.0067 |
| AC105233.5       | -2.23 | 2.09E-04 | 0.0030 |
| OPCML-IT1        | -2.23 | 4.55E-03 | 0.0158 |
| AL445531.1       | -2.23 | 2.12E-03 | 0.0099 |
| AL662844.4       | -2.23 | 1.73E-04 | 0.0028 |
| AC104564.5       | -2.23 | 2.36E-04 | 0.0032 |
| RARRES3          | -2.24 | 2.89E-04 | 0.0035 |
| CDH12            | -2.24 | 2.12E-03 | 0.0099 |
| AC092683.1       | -2.24 | 6.61E-05 | 0.0019 |
| GCOM1            | -2.24 | 5.61E-04 | 0.0047 |
| AC083806.2       | -2.24 | 3.21E-03 | 0.0127 |
| SH3BP5-AS1       | -2.24 | 1.46E-03 | 0.0080 |
| AC025034.1       | -2.24 | 9.84E-03 | 0.0265 |
| MGST1            | -2.24 | 1.24E-03 | 0.0073 |
| PAXBP1-AS1       | -2.25 | 1.99E-03 | 0.0095 |
| MDS2             | -2.25 | 1.28E-03 | 0.0074 |
| TC2N             | -2.25 | 1.71E-04 | 0.0028 |
| PRKG2            | -2.25 | 2.32E-04 | 0.0032 |
| DENND6A-DT       | -2.25 | 6.58E-03 | 0.0202 |
| AC091182.1       | -2.25 | 2.08E-02 | 0.0452 |
| RN7SKP151        | -2.25 | 4.29E-03 | 0.0153 |
| GPR150           | -2.25 | 1.19E-02 | 0.0303 |
| CEP68            | -2.25 | 1.40E-04 | 0.0026 |
| AP001062.1       | -2.25 | 4.13E-03 | 0.0149 |
| RPL21P44         | -2.25 | 6.44E-03 | 0.0199 |
| GPR174           | -2.26 | 1.48E-04 | 0.0026 |
| LINC00271        | -2.26 | 1.07E-03 | 0.0067 |
| RALGPS2          | -2.26 | 5.42E-04 | 0.0046 |
| ALOX5            | -2.27 | 2.37E-04 | 0.0032 |
| APBA2            | -2.27 | 1.06E-04 | 0.0023 |

|                  |       |          |        |
|------------------|-------|----------|--------|
| SUDS3P1          | -2.27 | 5.10E-03 | 0.0171 |
| AC074367.1       | -2.27 | 1.68E-02 | 0.0388 |
| KPNA2P3          | -2.27 | 2.83E-03 | 0.0117 |
| SNORA81          | -2.27 | 1.17E-04 | 0.0024 |
| GTF2IRD2B        | -2.27 | 2.15E-04 | 0.0031 |
| AARD             | -2.27 | 1.89E-02 | 0.0421 |
| AC005740.4       | -2.27 | 1.89E-02 | 0.0421 |
| AC019131.2       | -2.27 | 6.61E-04 | 0.0052 |
| AC106795.2       | -2.27 | 1.97E-02 | 0.0434 |
| AC106795.9       | -2.27 | 1.97E-02 | 0.0434 |
| ZNF331           | -2.27 | 1.41E-03 | 0.0078 |
| RNU6-202P        | -2.27 | 2.10E-02 | 0.0455 |
| FCRL1            | -2.27 | 4.90E-03 | 0.0166 |
| ENST000003362920 | -2.27 | 3.11E-04 | 0.0036 |
| COLQ             | -2.27 | 6.99E-04 | 0.0053 |
| DENND5B          | -2.27 | 3.40E-03 | 0.0131 |
| P2RY8            | -2.28 | 6.29E-05 | 0.0019 |
| CD200R1          | -2.28 | 1.47E-03 | 0.0080 |
| AKT3-IT1         | -2.28 | 7.56E-04 | 0.0055 |
| ENST000003414550 | -2.28 | 1.97E-04 | 0.0030 |
| ENST000002957560 | -2.28 | 8.56E-05 | 0.0021 |
| SNORD63          | -2.28 | 1.71E-02 | 0.0392 |
| FMR1-IT1         | -2.28 | 1.09E-03 | 0.0068 |
| AL136979.1       | -2.28 | 1.35E-02 | 0.0331 |
| DDX60L           | -2.28 | 3.36E-03 | 0.0130 |
| AL121823.1       | -2.28 | 7.54E-03 | 0.0222 |
| PKD1L1           | -2.28 | 1.97E-02 | 0.0434 |
| SPTLC1P1         | -2.28 | 3.42E-03 | 0.0132 |
| AC020912.1       | -2.29 | 6.82E-03 | 0.0207 |
| LAMA4            | -2.29 | 3.21E-04 | 0.0037 |
| PSG5             | -2.29 | 1.09E-02 | 0.0285 |
| CDK14            | -2.29 | 2.35E-02 | 0.0492 |
| MCUR1P1          | -2.29 | 1.25E-02 | 0.0313 |
| AC139768.1       | -2.30 | 2.67E-04 | 0.0034 |
| FAM238C          | -2.30 | 2.89E-04 | 0.0035 |
| AC006947.1       | -2.30 | 9.96E-04 | 0.0064 |
| ADAMTS2          | -2.30 | 8.31E-03 | 0.0236 |
| AC087667.1       | -2.30 | 1.39E-02 | 0.0338 |
| BTK              | -2.30 | 6.93E-03 | 0.0209 |
| KRT17P5          | -2.30 | 2.19E-03 | 0.0100 |
| ENST000003098620 | -2.30 | 1.29E-03 | 0.0074 |
| LINC00893        | -2.31 | 2.00E-03 | 0.0095 |
| AC027544.2       | -2.31 | 2.85E-03 | 0.0118 |
| ENST000002414161 | -2.31 | 6.30E-04 | 0.0050 |
| AC090229.1       | -2.31 | 2.56E-03 | 0.0111 |
| LINC01727        | -2.31 | 8.34E-04 | 0.0058 |
| AC084036.1       | -2.31 | 1.16E-02 | 0.0297 |

|                  |       |          |        |
|------------------|-------|----------|--------|
| LINC00920        | -2.31 | 2.26E-02 | 0.0478 |
| CAMK4            | -2.31 | 5.27E-05 | 0.0017 |
| FCMR             | -2.31 | 9.41E-05 | 0.0022 |
| LINC01967        | -2.31 | 1.35E-02 | 0.0332 |
| AL449403.1       | -2.31 | 8.08E-04 | 0.0057 |
| AC084768.1       | -2.31 | 1.76E-02 | 0.0400 |
| TMEM63A          | -2.31 | 1.23E-04 | 0.0025 |
| SEMA6A-AS1       | -2.31 | 4.79E-04 | 0.0044 |
| PTPN4            | -2.31 | 7.57E-05 | 0.0020 |
| ANXA2R           | -2.31 | 1.96E-04 | 0.0030 |
| CAP2P1           | -2.32 | 3.54E-03 | 0.0135 |
| TMCC3            | -2.32 | 4.50E-03 | 0.0157 |
| RALGPS1          | -2.32 | 2.85E-04 | 0.0035 |
| RBL2             | -2.32 | 1.26E-03 | 0.0073 |
| ZNF831           | -2.32 | 1.09E-04 | 0.0023 |
| MIR194-2HG       | -2.32 | 3.21E-03 | 0.0127 |
| FANK1            | -2.32 | 9.18E-04 | 0.0062 |
| UBASH3A          | -2.32 | 3.07E-04 | 0.0036 |
| LINC01422        | -2.32 | 1.67E-03 | 0.0086 |
| CNTN6            | -2.32 | 1.75E-02 | 0.0399 |
| GRM2             | -2.32 | 5.83E-03 | 0.0187 |
| PDZD4            | -2.32 | 2.84E-04 | 0.0035 |
| AC122707.1       | -2.32 | 9.89E-03 | 0.0266 |
| HCP5B            | -2.32 | 9.89E-03 | 0.0266 |
| LINC02064        | -2.32 | 9.89E-03 | 0.0266 |
| AC008280.3       | -2.33 | 3.53E-03 | 0.0134 |
| AC009088.1       | -2.33 | 1.08E-03 | 0.0067 |
| FAM71F2          | -2.33 | 2.09E-03 | 0.0098 |
| AC063950.1       | -2.33 | 8.35E-03 | 0.0237 |
| AC116366.1       | -2.33 | 3.51E-03 | 0.0134 |
| ST8SIA6          | -2.33 | 6.84E-04 | 0.0053 |
| PDE5A            | -2.33 | 1.10E-03 | 0.0068 |
| ENST000003184450 | -2.33 | 2.60E-04 | 0.0033 |
| LINC01089        | -2.33 | 6.07E-04 | 0.0049 |
| AL109923.1       | -2.33 | 2.43E-03 | 0.0107 |
| LINC00550        | -2.33 | 1.56E-03 | 0.0083 |
| LINC00970        | -2.33 | 5.21E-03 | 0.0173 |
| AC106782.1       | -2.33 | 7.96E-03 | 0.0230 |
| AC092140.1       | -2.33 | 1.64E-02 | 0.0380 |
| AC239800.2       | -2.33 | 3.61E-03 | 0.0137 |
| ENST000003349840 | -2.33 | 2.35E-03 | 0.0105 |
| PIK3IP1-AS1      | -2.34 | 3.00E-03 | 0.0122 |
| PPP3CB-AS1       | -2.34 | 1.28E-04 | 0.0025 |
| AC005224.3       | -2.34 | 4.96E-04 | 0.0044 |
| MYLIP            | -2.34 | 4.49E-05 | 0.0016 |
| AC093283.1       | -2.34 | 1.44E-03 | 0.0079 |
| RGMB             | -2.34 | 9.57E-03 | 0.0260 |

|                  |       |          |        |
|------------------|-------|----------|--------|
| LAIR1            | -2.35 | 1.77E-04 | 0.0028 |
| LINC00216        | -2.35 | 2.23E-03 | 0.0101 |
| ARHGEF11         | -2.35 | 1.28E-02 | 0.0320 |
| AL928711.1       | -2.35 | 4.87E-03 | 0.0166 |
| RNF222           | -2.35 | 5.33E-03 | 0.0176 |
| CR382285.1       | -2.35 | 2.21E-02 | 0.0471 |
| TCEA3            | -2.35 | 4.70E-03 | 0.0162 |
| ENST000003036351 | -2.35 | 4.40E-03 | 0.0155 |
| EPPK1            | -2.35 | 4.27E-04 | 0.0041 |
| TTC16            | -2.35 | 2.20E-03 | 0.0101 |
| DPYD-IT1         | -2.35 | 9.13E-04 | 0.0061 |
| PLXDC2           | -2.36 | 3.80E-03 | 0.0141 |
| AADAACL2         | -2.36 | 3.97E-03 | 0.0145 |
| YPEL1            | -2.36 | 3.46E-04 | 0.0038 |
| CALB1            | -2.36 | 1.16E-02 | 0.0298 |
| CABP4            | -2.36 | 2.27E-03 | 0.0103 |
| TNPO1P1          | -2.36 | 8.96E-04 | 0.0061 |
| CDKN1B           | -2.36 | 1.45E-04 | 0.0026 |
| AC012615.1       | -2.36 | 1.41E-04 | 0.0026 |
| AC244230.2       | -2.36 | 7.58E-03 | 0.0222 |
| AC139491.5       | -2.36 | 1.40E-03 | 0.0078 |
| CD96             | -2.36 | 1.43E-04 | 0.0026 |
| PER1             | -2.36 | 2.13E-04 | 0.0031 |
| AC008467.1       | -2.37 | 1.41E-04 | 0.0026 |
| TSC22D1          | -2.37 | 3.01E-04 | 0.0035 |
| TP53INP1         | -2.37 | 6.86E-04 | 0.0053 |
| FCRLA            | -2.37 | 3.34E-03 | 0.0130 |
| AC012645.4       | -2.37 | 9.58E-03 | 0.0260 |
| AC124312.1       | -2.37 | 6.24E-03 | 0.0195 |
| C11orf21         | -2.37 | 7.92E-04 | 0.0057 |
| HTN3             | -2.37 | 7.66E-04 | 0.0056 |
| ZNF204P          | -2.38 | 4.33E-04 | 0.0042 |
| GSN-AS1          | -2.38 | 7.44E-03 | 0.0220 |
| APOA2            | -2.38 | 4.89E-03 | 0.0166 |
| AMY2B            | -2.38 | 7.75E-05 | 0.0020 |
| CDH19            | -2.38 | 1.96E-02 | 0.0433 |
| CYSLTR1          | -2.38 | 1.24E-04 | 0.0025 |
| AC092794.1       | -2.38 | 5.77E-03 | 0.0186 |
| AL353729.2       | -2.38 | 9.43E-03 | 0.0257 |
| CFH              | -2.38 | 2.04E-04 | 0.0030 |
| OR2L3            | -2.39 | 5.28E-03 | 0.0174 |
| NLRP6            | -2.39 | 8.69E-03 | 0.0244 |
| MPP3             | -2.39 | 5.91E-03 | 0.0188 |
| AL606834.2       | -2.39 | 2.30E-04 | 0.0032 |
| CCSER1           | -2.39 | 4.47E-04 | 0.0042 |
| HAS3             | -2.39 | 2.03E-02 | 0.0443 |
| RF00019.328      | -2.39 | 1.11E-02 | 0.0289 |

|                  |       |          |        |
|------------------|-------|----------|--------|
| GDA              | -2.39 | 6.00E-03 | 0.0190 |
| RN7SL625P        | -2.39 | 1.44E-02 | 0.0348 |
| Z82206.1         | -2.39 | 1.68E-04 | 0.0028 |
| AC007333.2       | -2.39 | 5.84E-04 | 0.0048 |
| LINC00528        | -2.39 | 8.69E-03 | 0.0244 |
| SF1              | -2.39 | 7.45E-05 | 0.0020 |
| AL121839.2       | -2.40 | 1.20E-03 | 0.0071 |
| AL121839.4       | -2.40 | 1.20E-03 | 0.0071 |
| SYNE2            | -2.40 | 8.63E-05 | 0.0021 |
| THEMIS           | -2.40 | 3.60E-05 | 0.0015 |
| RF00322.6        | -2.40 | 1.19E-02 | 0.0302 |
| TSPAN2           | -2.40 | 7.01E-04 | 0.0054 |
| TPPP             | -2.40 | 2.51E-03 | 0.0110 |
| GTF2IRD2         | -2.40 | 2.17E-04 | 0.0031 |
| AC036176.2       | -2.40 | 2.76E-04 | 0.0034 |
| L3MBTL3          | -2.40 | 3.91E-05 | 0.0016 |
| AC013474.1       | -2.41 | 3.06E-04 | 0.0036 |
| DCHS1            | -2.41 | 2.65E-03 | 0.0113 |
| RNU6-60P         | -2.41 | 1.89E-02 | 0.0421 |
| TAS2R13          | -2.41 | 6.95E-03 | 0.0210 |
| CATSPERE         | -2.41 | 2.66E-03 | 0.0113 |
| RN7SL173P        | -2.41 | 2.54E-03 | 0.0110 |
| LINC01964        | -2.41 | 6.71E-03 | 0.0205 |
| IL11RA           | -2.42 | 8.67E-05 | 0.0021 |
| ENST000002332020 | -2.42 | 1.01E-02 | 0.0269 |
| LINC02472        | -2.42 | 3.92E-04 | 0.0040 |
| AC096887.1       | -2.42 | 2.28E-02 | 0.0482 |
| ENST000000253990 | -2.42 | 1.91E-03 | 0.0093 |
| AL035563.1       | -2.42 | 7.86E-04 | 0.0056 |
| ENST000003466520 | -2.42 | 6.68E-04 | 0.0052 |
| RF00019.480      | -2.42 | 1.26E-03 | 0.0073 |
| PYHIN1           | -2.42 | 6.49E-05 | 0.0019 |
| RF00019.23       | -2.42 | 4.25E-03 | 0.0152 |
| MS4A7            | -2.43 | 1.80E-02 | 0.0408 |
| RAPSN            | -2.43 | 5.64E-03 | 0.0183 |
| SAMHD1           | -2.43 | 1.46E-04 | 0.0026 |
| SCARNA5          | -2.43 | 1.84E-05 | 0.0011 |
| GRASP            | -2.43 | 3.00E-04 | 0.0035 |
| FYB1             | -2.43 | 1.13E-04 | 0.0024 |
| NOG              | -2.43 | 8.21E-04 | 0.0058 |
| SCG3             | -2.43 | 1.83E-02 | 0.0412 |
| AC104695.3       | -2.44 | 4.53E-03 | 0.0158 |
| AC006030.1       | -2.44 | 7.59E-03 | 0.0222 |
| RF01169.1        | -2.44 | 4.39E-04 | 0.0042 |
| ZMAT1            | -2.44 | 7.29E-05 | 0.0020 |
| PRKACB           | -2.44 | 4.29E-05 | 0.0016 |
| FRY              | -2.44 | 2.01E-03 | 0.0096 |

|                    |       |          |        |
|--------------------|-------|----------|--------|
| AC010245.1         | -2.45 | 9.59E-03 | 0.0260 |
| PNMA3              | -2.45 | 9.63E-05 | 0.0022 |
| RF00019.229        | -2.45 | 8.13E-04 | 0.0057 |
| KIT                | -2.45 | 4.76E-04 | 0.0044 |
| NR1D1              | -2.45 | 9.44E-03 | 0.0258 |
| RPL21P32           | -2.45 | 1.89E-02 | 0.0422 |
| ENST000003433381   | -2.45 | 2.88E-03 | 0.0118 |
| AC125612.1         | -2.45 | 1.50E-03 | 0.0081 |
| AL359962.1         | -2.46 | 1.33E-04 | 0.0025 |
| CCDC148            | -2.46 | 2.27E-02 | 0.0481 |
| TLR5               | -2.46 | 3.38E-03 | 0.0131 |
| YPEL5              | -2.46 | 9.80E-05 | 0.0022 |
| AL353597.1         | -2.46 | 9.42E-03 | 0.0257 |
| AC005674.2         | -2.46 | 2.66E-03 | 0.0113 |
| RNU4-24P           | -2.46 | 4.55E-03 | 0.0158 |
| WHAMM              | -2.46 | 5.68E-05 | 0.0017 |
| NLGN3              | -2.46 | 1.45E-03 | 0.0079 |
| NYAP2              | -2.46 | 1.46E-02 | 0.0351 |
| RNU4-51P           | -2.46 | 1.01E-02 | 0.0269 |
| INSYN1             | -2.46 | 3.42E-03 | 0.0132 |
| ENST00000389243    | -2.46 | 1.35E-03 | 0.0076 |
| CA14               | -2.47 | 1.26E-02 | 0.0316 |
| TRGV10             | -2.47 | 8.75E-04 | 0.0060 |
| PTGER4P2-CDK2AP2P2 | -2.47 | 8.70E-04 | 0.0060 |
| SCN3A              | -2.47 | 2.33E-03 | 0.0104 |
| PAPPA-AS1          | -2.47 | 2.46E-03 | 0.0108 |
| ENST000002601971   | -2.47 | 2.07E-05 | 0.0012 |
| DSEL               | -2.47 | 3.03E-04 | 0.0036 |
| SLC7A11-AS1        | -2.47 | 2.55E-03 | 0.0111 |
| LINC00954          | -2.47 | 3.88E-04 | 0.0040 |
| AC008764.8         | -2.47 | 5.72E-04 | 0.0048 |
| EVI2B              | -2.47 | 4.80E-05 | 0.0016 |
| PSMD6-AS2          | -2.47 | 9.88E-04 | 0.0064 |
| S1PR5              | -2.47 | 1.87E-02 | 0.0419 |
| METTL7A            | -2.47 | 1.78E-03 | 0.0089 |
| WWTR1-IT1          | -2.47 | 8.84E-03 | 0.0246 |
| AC124016.2         | -2.48 | 2.12E-03 | 0.0099 |
| AC090673.1         | -2.48 | 8.74E-03 | 0.0245 |
| PLXND1             | -2.48 | 1.05E-03 | 0.0066 |
| AC122129.1         | -2.48 | 1.48E-02 | 0.0354 |
| AC006978.1         | -2.48 | 6.01E-05 | 0.0018 |
| AC091551.1         | -2.48 | 3.44E-03 | 0.0132 |
| AC244260.1         | -2.48 | 5.56E-03 | 0.0181 |
| SNORD116-24        | -2.49 | 1.15E-02 | 0.0296 |
| MME                | -2.49 | 1.07E-03 | 0.0067 |
| AC004492.1         | -2.49 | 3.81E-03 | 0.0141 |
| AC004492.2         | -2.49 | 3.81E-03 | 0.0141 |

|                  |       |          |        |
|------------------|-------|----------|--------|
| AQP3             | -2.49 | 3.72E-04 | 0.0039 |
| APBA1            | -2.49 | 8.30E-03 | 0.0236 |
| KLHDC1           | -2.49 | 9.84E-05 | 0.0022 |
| AC012507.2       | -2.49 | 2.79E-03 | 0.0116 |
| AC015982.1       | -2.49 | 1.89E-03 | 0.0093 |
| FBP1             | -2.50 | 3.47E-03 | 0.0133 |
| KIF19            | -2.50 | 7.91E-03 | 0.0229 |
| BLZF2P           | -2.50 | 1.57E-02 | 0.0370 |
| ABTB1            | -2.50 | 1.09E-02 | 0.0285 |
| LINC01505        | -2.50 | 6.76E-03 | 0.0206 |
| TET1             | -2.50 | 3.28E-04 | 0.0037 |
| TMEM191A         | -2.50 | 2.31E-02 | 0.0486 |
| RAD51-AS1        | -2.50 | 9.67E-05 | 0.0022 |
| RN7SL430P        | -2.50 | 1.08E-02 | 0.0283 |
| AL360182.1       | -2.50 | 2.28E-04 | 0.0032 |
| RF00012.23       | -2.50 | 3.65E-03 | 0.0138 |
| AC002128.1       | -2.51 | 1.58E-03 | 0.0083 |
| PLA2G4D          | -2.51 | 2.51E-03 | 0.0110 |
| GUCY1B2          | -2.51 | 8.04E-03 | 0.0231 |
| CCR6             | -2.51 | 7.19E-05 | 0.0020 |
| STRA6LP          | -2.51 | 4.66E-03 | 0.0161 |
| BTG1             | -2.51 | 2.80E-05 | 0.0014 |
| AL031429.2       | -2.52 | 2.01E-03 | 0.0096 |
| AC009118.3       | -2.52 | 7.40E-04 | 0.0055 |
| C5AR1            | -2.52 | 1.03E-03 | 0.0066 |
| SLC18A2          | -2.52 | 1.02E-02 | 0.0272 |
| AC091806.1       | -2.52 | 1.26E-03 | 0.0073 |
| ENST000003387970 | -2.52 | 1.13E-02 | 0.0293 |
| LINC00908        | -2.52 | 4.00E-03 | 0.0146 |
| ZMYM1            | -2.52 | 1.44E-03 | 0.0079 |
| ENST000002433492 | -2.52 | 6.34E-04 | 0.0051 |
| RN7SL326P        | -2.52 | 1.35E-02 | 0.0332 |
| PABPC1L2A        | -2.52 | 8.51E-03 | 0.0240 |
| CASP1P2          | -2.52 | 3.04E-03 | 0.0122 |
| LINC02263        | -2.52 | 2.45E-03 | 0.0108 |
| RNU6-638P        | -2.53 | 1.51E-03 | 0.0081 |
| ZNF815P          | -2.53 | 1.13E-04 | 0.0024 |
| PPP2R2B          | -2.53 | 9.97E-05 | 0.0022 |
| LINC01126        | -2.53 | 2.90E-03 | 0.0119 |
| SORL1            | -2.54 | 4.07E-05 | 0.0016 |
| AL591503.1       | -2.54 | 3.13E-03 | 0.0125 |
| PLXDC1           | -2.54 | 9.53E-04 | 0.0063 |
| AC233309.1       | -2.54 | 3.49E-03 | 0.0133 |
| AMN              | -2.54 | 1.02E-02 | 0.0271 |
| AC004233.4       | -2.54 | 5.96E-04 | 0.0049 |
| TMEM272          | -2.55 | 2.67E-03 | 0.0113 |
| FAM19A2          | -2.55 | 5.44E-04 | 0.0046 |

|                  |       |          |        |
|------------------|-------|----------|--------|
| TMEM229B         | -2.55 | 4.11E-04 | 0.0041 |
| PTGDS            | -2.55 | 7.57E-03 | 0.0222 |
| CCDC146          | -2.55 | 5.90E-04 | 0.0049 |
| STMN3            | -2.55 | 1.49E-04 | 0.0026 |
| OXNAD1           | -2.55 | 3.17E-05 | 0.0014 |
| AL662889.1       | -2.55 | 1.98E-03 | 0.0095 |
| AP003352.1       | -2.56 | 1.61E-02 | 0.0376 |
| AK5              | -2.56 | 2.29E-03 | 0.0103 |
| AC026355.2       | -2.56 | 2.75E-03 | 0.0116 |
| MTURN            | -2.56 | 2.43E-04 | 0.0032 |
| MEGF6            | -2.57 | 2.94E-04 | 0.0035 |
| AL133384.1       | -2.57 | 1.50E-03 | 0.0081 |
| AC139491.7       | -2.57 | 8.87E-04 | 0.0060 |
| AC103769.1       | -2.57 | 3.58E-03 | 0.0136 |
| AC069503.1       | -2.57 | 7.33E-03 | 0.0217 |
| SNORA61          | -2.57 | 1.11E-02 | 0.0289 |
| GBP3             | -2.57 | 2.79E-04 | 0.0034 |
| AFF3             | -2.58 | 4.11E-03 | 0.0149 |
| ENST000003468320 | -2.58 | 8.09E-03 | 0.0232 |
| CD180            | -2.58 | 1.06E-02 | 0.0278 |
| NBEA             | -2.58 | 7.18E-04 | 0.0054 |
| SPDYE16          | -2.58 | 6.70E-03 | 0.0204 |
| SLC9A9           | -2.59 | 2.02E-04 | 0.0030 |
| DPYD             | -2.59 | 1.72E-05 | 0.0011 |
| DISC1            | -2.59 | 3.06E-04 | 0.0036 |
| ENST00000480419  | -2.59 | 3.78E-03 | 0.0141 |
| AC019227.1       | -2.59 | 2.04E-03 | 0.0096 |
| LOXL2            | -2.59 | 8.81E-03 | 0.0246 |
| PTPRO            | -2.59 | 2.40E-04 | 0.0032 |
| ENST00000636259  | -2.59 | 7.59E-03 | 0.0223 |
| HLA-DRA          | -2.59 | 1.16E-03 | 0.0070 |
| LY9              | -2.59 | 1.25E-04 | 0.0025 |
| WHAMMP2          | -2.60 | 3.20E-04 | 0.0037 |
| OR2M4            | -2.60 | 2.19E-04 | 0.0031 |
| ENST000003168511 | -2.60 | 6.20E-03 | 0.0194 |
| RFTN2            | -2.60 | 6.44E-03 | 0.0199 |
| ITPKB-IT1        | -2.60 | 2.53E-04 | 0.0033 |
| TXK              | -2.61 | 3.70E-04 | 0.0039 |
| IQCN             | -2.61 | 2.74E-04 | 0.0034 |
| ENST000002576261 | -2.61 | 1.48E-03 | 0.0080 |
| MCOLN3           | -2.61 | 3.56E-04 | 0.0038 |
| AP000977.1       | -2.61 | 3.59E-04 | 0.0038 |
| PLAC8            | -2.61 | 1.59E-03 | 0.0084 |
| AC090198.1       | -2.61 | 1.09E-04 | 0.0023 |
| PRKN             | -2.61 | 3.72E-04 | 0.0039 |
| AL162377.1       | -2.61 | 7.90E-03 | 0.0229 |
| CRAT37           | -2.61 | 1.04E-03 | 0.0066 |



|                  |       |          |        |
|------------------|-------|----------|--------|
| AC087878.1       | -2.61 | 6.04E-03 | 0.0191 |
| MRPL37P1         | -2.62 | 3.19E-04 | 0.0037 |
| TRGC1            | -2.62 | 1.47E-03 | 0.0080 |
| AC005154.2       | -2.62 | 3.99E-04 | 0.0040 |
| EEF1DP7          | -2.62 | 1.85E-03 | 0.0091 |
| POU5F1B          | -2.62 | 4.91E-04 | 0.0044 |
| ENST000003074413 | -2.62 | 1.35E-03 | 0.0076 |
| CLEC2B           | -2.62 | 1.28E-03 | 0.0074 |
| SOX4             | -2.62 | 3.62E-03 | 0.0137 |
| KRT73-AS1        | -2.62 | 9.33E-03 | 0.0255 |
| EMBP1            | -2.63 | 1.41E-04 | 0.0026 |
| ZNF483           | -2.63 | 1.59E-03 | 0.0084 |
| ITPKB            | -2.63 | 1.36E-04 | 0.0025 |
| AC004067.1       | -2.63 | 2.55E-04 | 0.0033 |
| ENST000003515780 | -2.63 | 1.73E-04 | 0.0028 |
| LTK              | -2.63 | 6.40E-04 | 0.0051 |
| C4orf50          | -2.63 | 2.88E-03 | 0.0118 |
| TDRD12           | -2.64 | 2.16E-03 | 0.0099 |
| LINC02328        | -2.64 | 1.14E-04 | 0.0024 |
| TMEM40           | -2.64 | 8.77E-03 | 0.0245 |
| AL138756.1       | -2.64 | 2.87E-03 | 0.0118 |
| AUTS2            | -2.64 | 1.11E-03 | 0.0068 |
| SPATA41          | -2.64 | 1.10E-02 | 0.0286 |
| ALS2CL           | -2.64 | 1.99E-04 | 0.0030 |
| AC018442.1       | -2.64 | 5.08E-03 | 0.0170 |
| TMEM200A         | -2.64 | 2.60E-04 | 0.0033 |
| Z98755.1         | -2.64 | 1.10E-03 | 0.0068 |
| AC007529.1       | -2.65 | 2.35E-03 | 0.0105 |
| AC007342.1       | -2.65 | 7.18E-03 | 0.0214 |
| AP005263.1       | -2.65 | 1.11E-03 | 0.0068 |
| CNTN2            | -2.65 | 3.37E-03 | 0.0131 |
| AL034550.2       | -2.65 | 2.04E-03 | 0.0096 |
| AC008549.2       | -2.65 | 3.85E-04 | 0.0039 |
| RNF113B          | -2.65 | 3.52E-04 | 0.0038 |
| HMGB3P4          | -2.66 | 1.40E-03 | 0.0078 |
| SLC40A1          | -2.66 | 3.76E-03 | 0.0140 |
| AC122718.2       | -2.66 | 4.57E-03 | 0.0159 |
| APBB1            | -2.66 | 5.41E-05 | 0.0017 |
| AC005291.1       | -2.66 | 9.60E-03 | 0.0261 |
| TAB3-AS1         | -2.66 | 3.60E-03 | 0.0136 |
| IL7R             | -2.66 | 1.02E-05 | 0.0010 |
| AL359962.2       | -2.66 | 3.87E-04 | 0.0040 |
| AL645933.2       | -2.66 | 1.65E-04 | 0.0028 |
| CERS3            | -2.67 | 2.92E-03 | 0.0119 |
| AC092650.1       | -2.67 | 1.96E-03 | 0.0094 |
| AC006064.5       | -2.67 | 3.91E-05 | 0.0016 |
| AC090833.1       | -2.67 | 2.05E-04 | 0.0030 |

|                  |       |          |        |
|------------------|-------|----------|--------|
| AC093423.2       | -2.68 | 3.19E-04 | 0.0037 |
| TCF7             | -2.68 | 1.73E-04 | 0.0028 |
| KANSL1-AS1       | -2.68 | 2.32E-03 | 0.0104 |
| EEPD1            | -2.69 | 1.00E-02 | 0.0267 |
| RFX4             | -2.69 | 8.37E-03 | 0.0238 |
| HGD              | -2.69 | 1.30E-03 | 0.0074 |
| AC005842.1       | -2.69 | 4.41E-03 | 0.0155 |
| GCKR             | -2.69 | 4.39E-03 | 0.0155 |
| PARP8            | -2.69 | 2.51E-05 | 0.0013 |
| LECT2            | -2.69 | 1.14E-03 | 0.0069 |
| ZNF890P          | -2.70 | 3.66E-04 | 0.0039 |
| LINC01242        | -2.70 | 7.03E-03 | 0.0211 |
| AC010983.1       | -2.70 | 9.78E-03 | 0.0264 |
| SDR42E2          | -2.70 | 3.72E-04 | 0.0039 |
| MHENCR           | -2.70 | 8.64E-05 | 0.0021 |
| AL365361.1       | -2.71 | 1.74E-05 | 0.0011 |
| AXIN2            | -2.71 | 5.89E-05 | 0.0018 |
| ENST000002601841 | -2.72 | 3.18E-04 | 0.0037 |
| DNAJB1           | -2.72 | 2.54E-05 | 0.0013 |
| ANTXR2           | -2.73 | 1.95E-05 | 0.0012 |
| LINCR-0001       | -2.73 | 1.04E-02 | 0.0275 |
| GDF5OS           | -2.73 | 7.58E-03 | 0.0222 |
| PRNCR1           | -2.73 | 1.10E-04 | 0.0023 |
| LINC00266-4P     | -2.73 | 5.51E-03 | 0.0180 |
| AL669831.4       | -2.73 | 9.51E-05 | 0.0022 |
| RN7SL801P        | -2.74 | 4.16E-03 | 0.0150 |
| TAS2R63P         | -2.74 | 2.32E-03 | 0.0104 |
| AP000936.3       | -2.74 | 2.28E-02 | 0.0482 |
| AL357033.3       | -2.75 | 1.39E-03 | 0.0077 |
| AL355103.1       | -2.75 | 2.11E-02 | 0.0457 |
| COX6CP1          | -2.75 | 1.44E-03 | 0.0079 |
| AC090092.1       | -2.76 | 7.41E-03 | 0.0219 |
| FRG1FP           | -2.76 | 5.60E-03 | 0.0182 |
| ERP27            | -2.77 | 5.16E-04 | 0.0045 |
| IPCEF1           | -2.77 | 5.32E-05 | 0.0017 |
| CARD16           | -2.77 | 5.12E-05 | 0.0017 |
| ZNF652           | -2.77 | 5.35E-05 | 0.0017 |
| PLBD1            | -2.77 | 1.21E-02 | 0.0307 |
| AC011939.3       | -2.77 | 1.37E-02 | 0.0334 |
| SNTN             | -2.77 | 4.32E-03 | 0.0153 |
| BOC              | -2.78 | 7.44E-04 | 0.0055 |
| RN7SL749P        | -2.78 | 4.17E-03 | 0.0150 |
| CR2              | -2.79 | 1.63E-02 | 0.0378 |
| MS4A6A           | -2.79 | 1.02E-03 | 0.0065 |
| AC027045.3       | -2.80 | 3.37E-03 | 0.0131 |
| AC093726.2       | -2.80 | 3.37E-03 | 0.0131 |
| AL391834.2       | -2.80 | 2.09E-03 | 0.0098 |

|             |       |          |        |
|-------------|-------|----------|--------|
| AC022140.1  | -2.80 | 6.03E-03 | 0.0191 |
| LINC01395   | -2.81 | 5.15E-03 | 0.0172 |
| BEND2       | -2.81 | 1.67E-03 | 0.0086 |
| MSRB3       | -2.82 | 9.60E-04 | 0.0063 |
| MLXIPL      | -2.82 | 4.33E-03 | 0.0154 |
| KRT26       | -2.82 | 1.04E-04 | 0.0023 |
| AC103724.4  | -2.82 | 1.25E-03 | 0.0073 |
| AC058823.1  | -2.82 | 2.00E-02 | 0.0438 |
| ARHGAP15    | -2.82 | 2.27E-05 | 0.0012 |
| MIR3679     | -2.82 | 5.23E-03 | 0.0174 |
| LINC01725   | -2.82 | 1.14E-03 | 0.0069 |
| AMIGO1      | -2.82 | 3.38E-04 | 0.0037 |
| AC109454.2  | -2.83 | 7.99E-04 | 0.0057 |
| ADAM28      | -2.83 | 2.02E-04 | 0.0030 |
| LPAR6       | -2.83 | 3.51E-04 | 0.0038 |
| GRK5-IT1    | -2.83 | 4.50E-04 | 0.0042 |
| TBX4        | -2.83 | 5.18E-03 | 0.0173 |
| RF00019.470 | -2.84 | 4.74E-04 | 0.0044 |
| GCNT4       | -2.84 | 2.77E-05 | 0.0014 |
| CTSF        | -2.84 | 1.29E-04 | 0.0025 |
| EEF1A1P3    | -2.84 | 4.23E-04 | 0.0041 |
| LIME1       | -2.84 | 1.03E-02 | 0.0273 |
| PIK3R5      | -2.84 | 1.99E-04 | 0.0030 |
| LINC00987   | -2.85 | 2.72E-03 | 0.0115 |
| CNNM3-DT    | -2.85 | 9.87E-04 | 0.0064 |
| TENT5A      | -2.85 | 1.96E-03 | 0.0094 |
| AC016590.3  | -2.85 | 6.50E-05 | 0.0019 |
| ITGA4       | -2.85 | 1.27E-05 | 0.0010 |
| TCF4        | -2.85 | 3.53E-04 | 0.0038 |
| AC005197.1  | -2.86 | 4.28E-03 | 0.0153 |
| LPAL2       | -2.86 | 2.15E-04 | 0.0031 |
| AC013264.1  | -2.86 | 8.15E-03 | 0.0233 |
| AC008686.1  | -2.86 | 1.26E-02 | 0.0315 |
| IGHM        | -2.86 | 6.16E-03 | 0.0193 |
| AL354798.1  | -2.86 | 5.15E-03 | 0.0172 |
| TLE1        | -2.87 | 9.82E-03 | 0.0264 |
| AC125437.1  | -2.87 | 3.30E-04 | 0.0037 |
| AC105150.1  | -2.87 | 1.24E-02 | 0.0311 |
| IZUMO1      | -2.87 | 2.43E-04 | 0.0032 |
| ZBTB20      | -2.88 | 7.72E-05 | 0.0020 |
| LILRB2      | -2.88 | 3.87E-03 | 0.0143 |
| PRDM11      | -2.88 | 2.29E-03 | 0.0103 |
| RANBP2      | -2.89 | 6.35E-05 | 0.0019 |
| GABARAPL1   | -2.89 | 2.02E-05 | 0.0012 |
| SELENOP     | -2.89 | 5.94E-03 | 0.0189 |
| AC135782.3  | -2.89 | 1.70E-03 | 0.0087 |
| CDC14A      | -2.90 | 1.21E-05 | 0.0010 |

|                  |       |          |        |
|------------------|-------|----------|--------|
| RASA3-IT1        | -2.90 | 3.13E-03 | 0.0125 |
| AC016405.1       | -2.90 | 2.63E-04 | 0.0033 |
| LINC02273        | -2.90 | 1.62E-04 | 0.0027 |
| KLRC4-KLRK1      | -2.90 | 1.33E-02 | 0.0329 |
| AC093865.1       | -2.91 | 1.57E-03 | 0.0083 |
| GOLGA5P1         | -2.91 | 7.70E-04 | 0.0056 |
| AC103724.3       | -2.91 | 2.69E-03 | 0.0114 |
| LILRB4           | -2.92 | 4.81E-03 | 0.0164 |
| AP000787.1       | -2.92 | 9.80E-04 | 0.0064 |
| ENST000000824681 | -2.93 | 9.15E-05 | 0.0022 |
| AC007342.5       | -2.93 | 7.95E-03 | 0.0230 |
| PCAT1            | -2.93 | 2.08E-04 | 0.0030 |
| AL513534.1       | -2.94 | 2.28E-04 | 0.0032 |
| PTGDR2           | -2.94 | 3.76E-03 | 0.0140 |
| PGBD5            | -2.95 | 3.96E-03 | 0.0145 |
| RCBTB2           | -2.95 | 1.40E-03 | 0.0078 |
| FABP7P1          | -2.95 | 4.03E-03 | 0.0146 |
| DIP2C            | -2.95 | 4.10E-04 | 0.0041 |
| LINC01726        | -2.96 | 4.88E-03 | 0.0166 |
| KDELC1P1         | -2.96 | 2.01E-02 | 0.0441 |
| RAB27B           | -2.96 | 1.63E-04 | 0.0027 |
| PDZD2            | -2.96 | 5.10E-03 | 0.0171 |
| RN7SL824P        | -2.96 | 3.43E-03 | 0.0132 |
| AC110921.1       | -2.97 | 1.01E-02 | 0.0269 |
| AC159540.2       | -2.97 | 3.36E-05 | 0.0015 |
| FAM133DP         | -2.97 | 3.31E-04 | 0.0037 |
| AL356022.1       | -2.97 | 2.39E-03 | 0.0106 |
| MYBL1            | -2.97 | 1.19E-05 | 0.0010 |
| MIR5690          | -2.97 | 9.62E-05 | 0.0022 |
| TENT5C           | -2.97 | 3.29E-05 | 0.0015 |
| AC134508.1       | -2.97 | 2.40E-04 | 0.0032 |
| AL589993.1       | -2.97 | 4.23E-05 | 0.0016 |
| DRICH1           | -2.98 | 2.52E-03 | 0.0110 |
| RIPOR2           | -2.98 | 3.10E-05 | 0.0014 |
| CCT4P2           | -2.98 | 7.13E-04 | 0.0054 |
| TOX              | -2.99 | 2.67E-04 | 0.0034 |
| CDHR3            | -2.99 | 5.22E-05 | 0.0017 |
| TMEM119          | -3.00 | 2.26E-03 | 0.0102 |
| TCP11L2          | -3.00 | 1.11E-05 | 0.0010 |
| AL357033.4       | -3.00 | 2.57E-04 | 0.0033 |
| RNU6-1010P       | -3.01 | 4.67E-03 | 0.0161 |
| BCAS1            | -3.01 | 8.49E-04 | 0.0059 |
| AC118658.1       | -3.02 | 1.30E-02 | 0.0322 |
| ENST000003046210 | -3.02 | 4.57E-05 | 0.0016 |
| AL360270.1       | -3.02 | 1.32E-04 | 0.0025 |
| ENST000003023162 | -3.03 | 6.82E-03 | 0.0207 |
| ATXN7            | -3.03 | 3.58E-05 | 0.0015 |

|                  |       |          |        |
|------------------|-------|----------|--------|
| PLA2G2D          | -3.03 | 4.70E-03 | 0.0162 |
| AC104964.3       | -3.03 | 1.19E-02 | 0.0302 |
| TIPARP-AS1       | -3.03 | 6.29E-03 | 0.0196 |
| EPHA4            | -3.04 | 1.35E-04 | 0.0025 |
| SERPINF1         | -3.05 | 3.01E-04 | 0.0035 |
| AC008115.3       | -3.05 | 9.96E-05 | 0.0022 |
| IGHV3-36         | -3.05 | 1.27E-03 | 0.0073 |
| AC005534.1       | -3.05 | 7.77E-04 | 0.0056 |
| HPCAL4           | -3.05 | 4.41E-05 | 0.0016 |
| BAGE2            | -3.06 | 5.43E-04 | 0.0046 |
| GAPT             | -3.06 | 6.74E-03 | 0.0205 |
| ENST000002641071 | -3.06 | 4.98E-05 | 0.0017 |
| AL159972.1       | -3.06 | 3.01E-03 | 0.0122 |
| LINC02033        | -3.07 | 1.46E-04 | 0.0026 |
| AC036108.3       | -3.07 | 4.86E-03 | 0.0165 |
| RASSF6           | -3.07 | 4.13E-04 | 0.0041 |
| AL359792.1       | -3.07 | 4.57E-03 | 0.0159 |
| SLCO3A1          | -3.08 | 7.31E-04 | 0.0055 |
| MAP2K6           | -3.09 | 1.15E-04 | 0.0024 |
| AL645568.2       | -3.09 | 9.05E-03 | 0.0251 |
| AC122710.2       | -3.10 | 1.68E-04 | 0.0028 |
| NDUFV2-AS1       | -3.10 | 4.67E-04 | 0.0043 |
| UNC45B           | -3.10 | 7.74E-04 | 0.0056 |
| SYT2             | -3.10 | 2.92E-03 | 0.0119 |
| CX3CR1           | -3.10 | 3.66E-03 | 0.0138 |
| LINC01876        | -3.11 | 1.74E-02 | 0.0398 |
| KRT73            | -3.11 | 6.91E-04 | 0.0053 |
| VPS37B           | -3.11 | 2.05E-04 | 0.0030 |
| GPRASP1          | -3.11 | 1.23E-05 | 0.0010 |
| AC068722.2       | -3.12 | 3.71E-03 | 0.0139 |
| AC067863.1       | -3.12 | 3.14E-03 | 0.0125 |
| AC022916.1       | -3.13 | 1.49E-04 | 0.0026 |
| SLC14A1          | -3.13 | 1.07E-03 | 0.0067 |
| AC025884.1       | -3.14 | 6.92E-03 | 0.0209 |
| NR1D2            | -3.14 | 1.64E-05 | 0.0011 |
| HSPE1P28         | -3.14 | 2.51E-03 | 0.0109 |
| AC024267.4       | -3.14 | 2.80E-03 | 0.0116 |
| AL359885.1       | -3.14 | 1.58E-02 | 0.0371 |
| LINC01934        | -3.15 | 8.99E-04 | 0.0061 |
| MIR3611          | -3.15 | 4.75E-03 | 0.0163 |
| KLRG1            | -3.15 | 1.85E-04 | 0.0029 |
| MAP1LC3B2        | -3.15 | 2.43E-03 | 0.0107 |
| SPDYA            | -3.15 | 1.25E-05 | 0.0010 |
| LINC00921        | -3.15 | 1.10E-04 | 0.0023 |
| TBC1D9           | -3.15 | 3.14E-03 | 0.0125 |
| GZMA             | -3.16 | 1.60E-03 | 0.0084 |
| AC009812.1       | -3.16 | 2.04E-02 | 0.0445 |

|                  |       |          |        |
|------------------|-------|----------|--------|
| THRIL            | -3.16 | 2.15E-03 | 0.0099 |
| AC026979.2       | -3.17 | 1.23E-04 | 0.0025 |
| SEC22B4P         | -3.17 | 3.60E-03 | 0.0136 |
| ARL4C            | -3.17 | 9.33E-05 | 0.0022 |
| PI16             | -3.17 | 4.45E-04 | 0.0042 |
| RF00019.708      | -3.18 | 1.27E-04 | 0.0025 |
| AC017035.1       | -3.18 | 8.92E-05 | 0.0021 |
| AC022079.1       | -3.18 | 1.75E-04 | 0.0028 |
| AL109811.2       | -3.19 | 2.24E-04 | 0.0031 |
| TSC22D1-AS1      | -3.19 | 1.58E-02 | 0.0371 |
| C11orf88         | -3.19 | 2.68E-03 | 0.0114 |
| GLIPR1           | -3.20 | 4.46E-05 | 0.0016 |
| TLR3             | -3.20 | 9.89E-05 | 0.0022 |
| FCN1             | -3.20 | 1.63E-03 | 0.0085 |
| HKDC1            | -3.20 | 1.10E-02 | 0.0287 |
| MIR8485          | -3.22 | 5.90E-03 | 0.0188 |
| TTN              | -3.22 | 6.70E-05 | 0.0019 |
| LINC02119        | -3.22 | 1.36E-03 | 0.0076 |
| NR4A2            | -3.23 | 1.24E-03 | 0.0073 |
| LIMCH1           | -3.23 | 1.35E-03 | 0.0076 |
| NR3C2            | -3.24 | 6.41E-05 | 0.0019 |
| AC007064.2       | -3.24 | 2.89E-03 | 0.0119 |
| TNRC6C-AS1       | -3.24 | 8.14E-05 | 0.0021 |
| AMD1P4           | -3.24 | 7.73E-04 | 0.0056 |
| AL158210.1       | -3.25 | 1.77E-03 | 0.0089 |
| AC092375.2       | -3.25 | 1.21E-04 | 0.0024 |
| AC241988.2       | -3.25 | 1.21E-04 | 0.0024 |
| TKTL1            | -3.25 | 4.13E-03 | 0.0149 |
| KRT18P15         | -3.26 | 1.01E-02 | 0.0269 |
| ATM              | -3.26 | 3.48E-06 | 0.0009 |
| ENST000003510710 | -3.26 | 1.70E-03 | 0.0087 |
| AC021242.2       | -3.26 | 2.31E-03 | 0.0104 |
| AL627402.1       | -3.27 | 3.21E-03 | 0.0127 |
| LINC01891        | -3.27 | 1.93E-03 | 0.0094 |
| AL590426.2       | -3.28 | 2.37E-04 | 0.0032 |
| ADAMTS10         | -3.28 | 1.24E-03 | 0.0073 |
| AC103703.1       | -3.28 | 1.31E-03 | 0.0075 |
| AC068134.3       | -3.28 | 1.78E-03 | 0.0089 |
| CHRNA2           | -3.28 | 1.19E-03 | 0.0071 |
| AL357060.1       | -3.29 | 1.67E-05 | 0.0011 |
| RGS1             | -3.29 | 1.27E-04 | 0.0025 |
| RAB37            | -3.29 | 6.62E-05 | 0.0019 |
| IFNG-AS1         | -3.29 | 1.18E-04 | 0.0024 |
| RGS2             | -3.29 | 1.41E-05 | 0.0011 |
| ENST000002762040 | -3.31 | 4.29E-04 | 0.0041 |
| AL591895.1       | -3.31 | 2.53E-04 | 0.0033 |
| LINC02361        | -3.31 | 2.21E-04 | 0.0031 |

|                  |       |          |        |
|------------------|-------|----------|--------|
| CLCF1            | -3.32 | 1.65E-03 | 0.0086 |
| DGKB             | -3.32 | 3.47E-03 | 0.0133 |
| HAVCR1           | -3.33 | 4.27E-03 | 0.0152 |
| CDC42BPG         | -3.33 | 5.09E-04 | 0.0045 |
| CHN2             | -3.34 | 1.62E-03 | 0.0085 |
| SCML4            | -3.35 | 9.43E-05 | 0.0022 |
| CCDC141          | -3.35 | 2.88E-04 | 0.0035 |
| AC100802.1       | -3.36 | 3.01E-04 | 0.0035 |
| PTGER2           | -3.37 | 1.96E-05 | 0.0012 |
| FAM221B          | -3.37 | 2.99E-04 | 0.0035 |
| STMN1P1          | -3.38 | 1.95E-03 | 0.0094 |
| MXD4             | -3.38 | 5.99E-05 | 0.0018 |
| AL137222.1       | -3.38 | 1.51E-02 | 0.0358 |
| HPGDS            | -3.38 | 1.51E-02 | 0.0358 |
| PPIAP53          | -3.38 | 1.85E-03 | 0.0092 |
| LINC01801        | -3.39 | 2.57E-04 | 0.0033 |
| PLXNA4           | -3.40 | 3.93E-04 | 0.0040 |
| TLR8             | -3.40 | 2.31E-02 | 0.0486 |
| ENST000002735501 | -3.40 | 1.36E-03 | 0.0076 |
| LINC02295        | -3.41 | 2.31E-02 | 0.0487 |
| B3GALT2          | -3.42 | 9.36E-03 | 0.0256 |
| SPRY3            | -3.42 | 8.81E-05 | 0.0021 |
| SLC44A3-AS1      | -3.43 | 1.49E-03 | 0.0081 |
| EFHC2            | -3.43 | 1.54E-04 | 0.0027 |
| ANTXRPL1         | -3.43 | 1.39E-03 | 0.0077 |
| ENST000002406180 | -3.44 | 1.96E-02 | 0.0433 |
| AC016582.2       | -3.44 | 1.07E-03 | 0.0067 |
| SUSD4            | -3.44 | 4.80E-03 | 0.0164 |
| AL050343.1       | -3.44 | 2.53E-03 | 0.0110 |
| AL139415.1       | -3.46 | 4.83E-03 | 0.0165 |
| C1orf162         | -3.46 | 5.32E-03 | 0.0175 |
| C12orf40         | -3.46 | 1.49E-02 | 0.0356 |
| GOLGA7B          | -3.46 | 2.20E-04 | 0.0031 |
| SEMA3C           | -3.46 | 3.13E-03 | 0.0125 |
| FRAT1            | -3.47 | 3.09E-05 | 0.0014 |
| IGHV3-33         | -3.47 | 1.68E-03 | 0.0086 |
| IL7              | -3.47 | 2.07E-03 | 0.0097 |
| RNF157-AS1       | -3.47 | 2.10E-02 | 0.0454 |
| SYK              | -3.49 | 6.75E-04 | 0.0052 |
| RHBDL2           | -3.49 | 2.07E-02 | 0.0450 |
| VIPR1            | -3.49 | 9.26E-03 | 0.0254 |
| ENST000003165490 | -3.50 | 1.53E-05 | 0.0011 |
| HNF4G            | -3.50 | 2.13E-02 | 0.0459 |
| IGHV3-7          | -3.51 | 1.12E-03 | 0.0068 |
| AC069213.1       | -3.52 | 8.93E-04 | 0.0061 |
| Z92544.2         | -3.52 | 1.25E-02 | 0.0314 |
| CELA1            | -3.52 | 1.98E-02 | 0.0436 |

|                  |       |          |        |
|------------------|-------|----------|--------|
| RNU6-1321P       | -3.52 | 1.98E-02 | 0.0436 |
| TLR1             | -3.52 | 2.02E-04 | 0.0030 |
| ITGA6            | -3.54 | 4.70E-05 | 0.0016 |
| FRMPD3           | -3.54 | 1.98E-02 | 0.0436 |
| SULF2            | -3.54 | 4.85E-03 | 0.0165 |
| FGF9             | -3.54 | 3.93E-04 | 0.0040 |
| CCR5             | -3.55 | 3.08E-04 | 0.0036 |
| MEIS1            | -3.55 | 1.18E-03 | 0.0071 |
| ADAMTS17         | -3.55 | 2.74E-04 | 0.0034 |
| ZFP36L2          | -3.55 | 1.50E-05 | 0.0011 |
| AC027682.4       | -3.56 | 1.89E-02 | 0.0422 |
| SEMA3G           | -3.56 | 2.82E-03 | 0.0117 |
| AC008878.3       | -3.56 | 5.04E-03 | 0.0169 |
| ALO21920.2       | -3.56 | 2.17E-02 | 0.0465 |
| AC119396.1       | -3.56 | 1.55E-05 | 0.0011 |
| AC011379.2       | -3.58 | 1.12E-02 | 0.0291 |
| AL158163.2       | -3.58 | 1.10E-03 | 0.0068 |
| VCAN             | -3.58 | 1.08E-03 | 0.0067 |
| FAM13A           | -3.59 | 3.38E-03 | 0.0131 |
| ENST000003322460 | -3.60 | 4.22E-05 | 0.0016 |
| OLFM5P           | -3.60 | 1.85E-02 | 0.0415 |
| SLC22A23         | -3.60 | 7.59E-04 | 0.0055 |
| DPEP2            | -3.61 | 1.29E-03 | 0.0074 |
| TXNIP            | -3.61 | 3.50E-05 | 0.0015 |
| FAM13A-AS1       | -3.62 | 4.56E-05 | 0.0016 |
| DIP2A-IT1        | -3.63 | 1.02E-03 | 0.0065 |
| FOS              | -3.63 | 4.90E-05 | 0.0017 |
| MYO16            | -3.64 | 7.05E-04 | 0.0054 |
| SUMO3            | -3.65 | 6.36E-03 | 0.0197 |
| FCRL6            | -3.65 | 1.01E-02 | 0.0270 |
| OCM              | -3.66 | 3.38E-04 | 0.0037 |
| ZNF540           | -3.66 | 4.68E-05 | 0.0016 |
| ENST000002993380 | -3.67 | 9.95E-03 | 0.0266 |
| TRBV23-1         | -3.68 | 1.23E-04 | 0.0025 |
| ADHFE1           | -3.68 | 5.53E-03 | 0.0180 |
| AC068580.4       | -3.69 | 9.72E-03 | 0.0263 |
| AL354813.1       | -3.69 | 9.72E-03 | 0.0263 |
| PLCL1            | -3.69 | 9.87E-06 | 0.0010 |
| SAMD3            | -3.69 | 1.49E-05 | 0.0011 |
| MIR3136          | -3.70 | 9.49E-03 | 0.0259 |
| PIK3R1           | -3.70 | 7.19E-06 | 0.0010 |
| HNRNPA1P70       | -3.70 | 6.52E-04 | 0.0051 |
| ACER1            | -3.71 | 1.66E-02 | 0.0384 |
| AL158163.1       | -3.71 | 6.32E-05 | 0.0019 |
| SESN3            | -3.72 | 1.57E-04 | 0.0027 |
| CLEC4C           | -3.72 | 9.17E-03 | 0.0253 |
| AC025171.5       | -3.72 | 1.71E-02 | 0.0393 |



|                  |       |          |        |
|------------------|-------|----------|--------|
| AC106882.1       | -3.73 | 9.19E-03 | 0.0253 |
| SIK1             | -3.74 | 2.14E-02 | 0.0461 |
| TRAT1            | -3.74 | 4.41E-04 | 0.0042 |
| IGLV3-19         | -3.75 | 1.97E-03 | 0.0095 |
| MEF2C            | -3.76 | 2.02E-04 | 0.0030 |
| AC024084.1       | -3.76 | 9.97E-04 | 0.0064 |
| AC131391.1       | -3.76 | 1.68E-03 | 0.0086 |
| ENST00000527515  | -3.77 | 1.47E-02 | 0.0353 |
| NHSL2            | -3.77 | 3.18E-05 | 0.0014 |
| ANXA1            | -3.77 | 4.29E-06 | 0.0009 |
| INSL6            | -3.77 | 9.75E-03 | 0.0263 |
| FGR              | -3.77 | 3.31E-04 | 0.0037 |
| ZIK1P1           | -3.78 | 8.80E-03 | 0.0246 |
| AL109767.1       | -3.78 | 1.89E-04 | 0.0029 |
| ACE              | -3.78 | 1.61E-04 | 0.0027 |
| WDR86-AS1        | -3.79 | 1.98E-03 | 0.0095 |
| KLF3             | -3.79 | 3.78E-06 | 0.0009 |
| RN7SL517P        | -3.80 | 3.89E-05 | 0.0016 |
| PPIAP72          | -3.80 | 2.09E-02 | 0.0453 |
| RF00019.18       | -3.80 | 1.48E-02 | 0.0355 |
| ZBP1             | -3.81 | 4.86E-05 | 0.0017 |
| TSPAN32          | -3.81 | 1.43E-05 | 0.0011 |
| AC008565.1       | -3.82 | 9.47E-03 | 0.0258 |
| FLT3             | -3.82 | 2.35E-02 | 0.0493 |
| AP002365.1       | -3.82 | 8.12E-03 | 0.0233 |
| EPGN             | -3.83 | 1.05E-03 | 0.0066 |
| AL365203.2       | -3.84 | 8.87E-05 | 0.0021 |
| AL353662.1       | -3.84 | 2.08E-02 | 0.0451 |
| COBLL1           | -3.84 | 2.97E-04 | 0.0035 |
| ENST000003340031 | -3.84 | 1.43E-05 | 0.0011 |
| TNFRSF19         | -3.85 | 1.44E-02 | 0.0348 |
| AC074254.1       | -3.86 | 7.54E-03 | 0.0222 |
| PIK3IP1          | -3.86 | 3.68E-05 | 0.0015 |
| AC233976.1       | -3.86 | 5.42E-05 | 0.0017 |
| TSPAN18          | -3.88 | 6.26E-05 | 0.0018 |
| FLJ40194         | -3.90 | 7.36E-03 | 0.0218 |
| AC139256.1       | -3.90 | 1.85E-05 | 0.0011 |
| AC068594.2       | -3.90 | 1.38E-02 | 0.0336 |
| AC068594.4       | -3.90 | 1.38E-02 | 0.0336 |
| RASA2-IT1        | -3.90 | 2.07E-04 | 0.0030 |
| CRIP2            | -3.90 | 1.17E-03 | 0.0070 |
| CYP2E1           | -3.91 | 7.11E-03 | 0.0213 |
| RN7SL653P        | -3.92 | 7.28E-04 | 0.0055 |
| IGLV1-51         | -3.92 | 5.56E-03 | 0.0181 |
| AC012557.2       | -3.92 | 1.34E-02 | 0.0329 |
| RF00019.281      | -3.93 | 7.05E-03 | 0.0212 |
| ENST000003177163 | -3.93 | 1.30E-02 | 0.0322 |

|                  |       |          |        |
|------------------|-------|----------|--------|
| RAB31            | -3.93 | 2.50E-04 | 0.0033 |
| NTN4             | -3.94 | 1.21E-02 | 0.0308 |
| AC055748.1       | -3.94 | 1.86E-04 | 0.0029 |
| ENST000003081910 | -3.95 | 7.58E-03 | 0.0222 |
| AC090948.3       | -3.96 | 3.67E-03 | 0.0138 |
| AL121845.2       | -3.97 | 9.79E-05 | 0.0022 |
| IGKV3-20         | -3.98 | 1.52E-03 | 0.0082 |
| AC008906.1       | -3.98 | 3.24E-04 | 0.0037 |
| ACSL6            | -3.98 | 6.57E-06 | 0.0010 |
| AC007952.5       | -3.99 | 1.30E-02 | 0.0323 |
| LINC01336        | -3.99 | 2.36E-05 | 0.0012 |
| ENST00000588041  | -4.01 | 8.03E-05 | 0.0020 |
| IGLV3-25         | -4.02 | 2.23E-03 | 0.0101 |
| AP000254.1       | -4.02 | 2.01E-02 | 0.0441 |
| CUBN             | -4.02 | 9.58E-05 | 0.0022 |
| AC090948.1       | -4.02 | 1.34E-05 | 0.0011 |
| AC092652.3       | -4.02 | 1.88E-05 | 0.0011 |
| FAM30A           | -4.03 | 1.32E-03 | 0.0075 |
| AC127526.1       | -4.03 | 5.86E-03 | 0.0187 |
| CCAT2            | -4.04 | 5.94E-03 | 0.0189 |
| FGF5             | -4.04 | 5.94E-03 | 0.0189 |
| KCNA2            | -4.05 | 2.21E-04 | 0.0031 |
| AC244034.2       | -4.08 | 2.06E-02 | 0.0449 |
| IGKV1-5          | -4.08 | 3.07E-03 | 0.0123 |
| IGLV1-47         | -4.09 | 4.44E-04 | 0.0042 |
| MMP28            | -4.11 | 5.31E-03 | 0.0175 |
| C16orf74         | -4.12 | 1.29E-02 | 0.0321 |
| AL356273.2       | -4.12 | 1.49E-02 | 0.0356 |
| IRS2             | -4.12 | 5.43E-06 | 0.0009 |
| ARMH2            | -4.13 | 2.79E-04 | 0.0034 |
| AC009831.3       | -4.13 | 4.65E-05 | 0.0016 |
| AC016957.2       | -4.14 | 1.49E-04 | 0.0026 |
| IGKV4-1          | -4.15 | 1.56E-03 | 0.0083 |
| AC091180.2       | -4.16 | 4.91E-03 | 0.0166 |
| FCGR2C           | -4.18 | 4.78E-03 | 0.0164 |
| DAB1             | -4.19 | 9.95E-03 | 0.0266 |
| AC090948.2       | -4.20 | 2.53E-03 | 0.0110 |
| MIR548C          | -4.20 | 6.22E-04 | 0.0050 |
| PSMD10P1         | -4.21 | 1.39E-02 | 0.0337 |
| AC006195.1       | -4.21 | 4.66E-03 | 0.0161 |
| ENST000003219350 | -4.21 | 8.99E-03 | 0.0249 |
| CSGALNACT1       | -4.21 | 8.30E-06 | 0.0010 |
| BAIAP3           | -4.21 | 6.53E-03 | 0.0201 |
| ST13P15          | -4.22 | 4.63E-03 | 0.0160 |
| AL355581.1       | -4.23 | 7.04E-05 | 0.0019 |
| IGHV3-74         | -4.23 | 8.31E-03 | 0.0236 |
| LINC00587        | -4.23 | 8.31E-03 | 0.0236 |

|                  |       |          |        |
|------------------|-------|----------|--------|
| AL022328.3       | -4.24 | 9.31E-03 | 0.0255 |
| AL049779.1       | -4.25 | 4.39E-03 | 0.0155 |
| PDGFD            | -4.25 | 5.25E-03 | 0.0174 |
| ENST000002435830 | -4.28 | 9.23E-03 | 0.0254 |
| TENM1            | -4.28 | 5.72E-05 | 0.0017 |
| IGHV3-23         | -4.29 | 2.51E-05 | 0.0013 |
| FAM238A          | -4.31 | 1.21E-02 | 0.0306 |
| IGFBP3           | -4.32 | 1.24E-05 | 0.0010 |
| ENST000002932083 | -4.32 | 8.21E-03 | 0.0234 |
| ANKRD30BP2       | -4.35 | 4.45E-03 | 0.0156 |
| ENST000002764401 | -4.35 | 4.45E-03 | 0.0156 |
| AP003717.1       | -4.37 | 2.76E-04 | 0.0034 |
| RN7SL178P        | -4.39 | 1.08E-02 | 0.0283 |
| RGS18            | -4.39 | 2.44E-03 | 0.0107 |
| IGHV5-51         | -4.40 | 8.84E-03 | 0.0246 |
| PKIA-AS1         | -4.41 | 2.65E-03 | 0.0113 |
| CXCR4            | -4.41 | 1.06E-06 | 0.0008 |
| LINC01888        | -4.41 | 4.31E-03 | 0.0153 |
| IGKV3-11         | -4.42 | 5.78E-03 | 0.0186 |
| AL135924.2       | -4.44 | 6.68E-03 | 0.0204 |
| HIGD1AP14        | -4.44 | 7.16E-03 | 0.0214 |
| ADA2             | -4.45 | 3.84E-06 | 0.0009 |
| LINC02390        | -4.45 | 1.51E-03 | 0.0081 |
| NUDT16L1         | -4.46 | 1.57E-02 | 0.0370 |
| AL117381.1       | -4.46 | 3.24E-03 | 0.0127 |
| LINC01259        | -4.47 | 3.21E-03 | 0.0127 |
| ARRDC5           | -4.48 | 2.87E-05 | 0.0014 |
| CARD17           | -4.49 | 1.49E-04 | 0.0026 |
| LYZ              | -4.50 | 1.07E-05 | 0.0010 |
| ENST000003429920 | -4.53 | 1.78E-05 | 0.0011 |
| SNED1            | -4.53 | 8.21E-03 | 0.0234 |
| CEACAM4          | -4.54 | 2.21E-03 | 0.0101 |
| ZNF521           | -4.55 | 3.05E-03 | 0.0123 |
| TRIB2            | -4.56 | 1.51E-06 | 0.0008 |
| ZDHHC20P1        | -4.56 | 2.16E-03 | 0.0099 |
| FREM1            | -4.56 | 1.68E-02 | 0.0387 |
| S100A9           | -4.59 | 3.22E-03 | 0.0127 |
| EAF1-AS1         | -4.60 | 1.31E-02 | 0.0324 |
| KLF17            | -4.61 | 2.13E-03 | 0.0099 |
| TSC22D3          | -4.62 | 1.12E-06 | 0.0008 |
| UTS2             | -4.63 | 5.61E-03 | 0.0182 |
| PPM1H            | -4.63 | 2.10E-03 | 0.0098 |
| IL12A            | -4.64 | 2.66E-03 | 0.0113 |
| IGLC3            | -4.64 | 6.83E-04 | 0.0053 |
| SIK1B            | -4.66 | 2.34E-04 | 0.0032 |
| BX248123.1       | -4.66 | 1.09E-04 | 0.0023 |
| RAP1GAP2         | -4.66 | 2.37E-04 | 0.0032 |

|                  |       |          |        |
|------------------|-------|----------|--------|
| IGLC2            | -4.67 | 1.74E-03 | 0.0088 |
| DUSP1            | -4.67 | 8.90E-06 | 0.0010 |
| NCR1             | -4.67 | 2.00E-03 | 0.0095 |
| MNDA             | -4.67 | 3.37E-03 | 0.0131 |
| IGLV2-8          | -4.68 | 9.84E-03 | 0.0265 |
| CACNB2           | -4.68 | 1.99E-03 | 0.0095 |
| ESR1             | -4.68 | 7.63E-05 | 0.0020 |
| ENST000003195841 | -4.70 | 1.76E-03 | 0.0089 |
| AC112693.1       | -4.71 | 2.49E-03 | 0.0109 |
| AC025171.4       | -4.71 | 1.78E-03 | 0.0089 |
| AC079015.1       | -4.72 | 1.48E-04 | 0.0026 |
| CTD1118.1        | -4.73 | 2.06E-03 | 0.0097 |
| FGL2             | -4.74 | 1.24E-03 | 0.0073 |
| AC046136.1       | -4.75 | 1.62E-03 | 0.0085 |
| ENC1             | -4.75 | 8.27E-04 | 0.0058 |
| RNU6-1152P       | -4.75 | 7.63E-03 | 0.0223 |
| WNT10B           | -4.76 | 1.66E-02 | 0.0385 |
| CCR2             | -4.76 | 2.04E-04 | 0.0030 |
| AP005242.3       | -4.76 | 1.70E-03 | 0.0087 |
| PTGDR            | -4.76 | 2.20E-03 | 0.0101 |
| CR1              | -4.77 | 1.02E-03 | 0.0065 |
| GPA33            | -4.77 | 2.55E-03 | 0.0111 |
| AP006284.1       | -4.77 | 1.87E-03 | 0.0092 |
| C12orf42         | -4.78 | 6.52E-06 | 0.0010 |
| GP5              | -4.79 | 8.78E-03 | 0.0245 |
| IGHA1            | -4.79 | 2.48E-04 | 0.0032 |
| IGKC             | -4.80 | 8.46E-04 | 0.0059 |
| IGLV1-40         | -4.80 | 1.54E-02 | 0.0365 |
| AC007349.3       | -4.81 | 1.63E-03 | 0.0085 |
| CCR3             | -4.81 | 1.63E-03 | 0.0085 |
| TTC39C-AS1       | -4.82 | 1.85E-04 | 0.0029 |
| IGLV1-44         | -4.83 | 2.09E-03 | 0.0098 |
| MS4A1            | -4.83 | 4.37E-03 | 0.0155 |
| CACNA1I          | -4.85 | 1.48E-05 | 0.0011 |
| IGKV1-9          | -4.85 | 1.40E-03 | 0.0078 |
| LINC00565        | -4.86 | 1.57E-02 | 0.0370 |
| IGKV2-24         | -4.87 | 7.42E-03 | 0.0219 |
| ENST00000542310  | -4.89 | 1.27E-03 | 0.0074 |
| AC009041.1       | -4.90 | 1.42E-03 | 0.0078 |
| RPL21P75         | -4.91 | 1.34E-03 | 0.0076 |
| WNT7A            | -4.91 | 1.07E-03 | 0.0067 |
| ENST000001946721 | -4.91 | 9.23E-03 | 0.0254 |
| ENST000003399980 | -4.92 | 1.20E-03 | 0.0071 |
| ENST000003241720 | -4.94 | 1.38E-03 | 0.0077 |
| DSC1             | -4.94 | 1.95E-04 | 0.0030 |
| ENST000002861221 | -4.96 | 1.13E-03 | 0.0069 |
| IGLC1            | -4.98 | 2.03E-05 | 0.0012 |

|                  |       |          |        |
|------------------|-------|----------|--------|
| IGHG2            | -4.98 | 1.74E-02 | 0.0398 |
| AC100827.3       | -4.99 | 1.10E-03 | 0.0068 |
| COPS8P2          | -5.03 | 1.23E-03 | 0.0072 |
| IGKV1-33         | -5.03 | 1.69E-02 | 0.0389 |
| HSD17B13         | -5.03 | 1.19E-03 | 0.0071 |
| BORCS7-ASMT      | -5.03 | 1.10E-03 | 0.0068 |
| SNRK-AS1         | -5.04 | 1.50E-03 | 0.0081 |
| ENST000002646900 | -5.05 | 2.14E-03 | 0.0099 |
| RF00019.201      | -5.06 | 1.31E-03 | 0.0075 |
| AC107626.1       | -5.09 | 1.04E-03 | 0.0066 |
| ISM1             | -5.09 | 1.54E-04 | 0.0027 |
| MPO              | -5.12 | 1.78E-03 | 0.0089 |
| VSIG1            | -5.13 | 1.65E-05 | 0.0011 |
| IGHV3-21         | -5.16 | 3.96E-03 | 0.0145 |
| AL163932.1       | -5.17 | 8.37E-04 | 0.0058 |
| IGHV2-5          | -5.17 | 1.13E-03 | 0.0069 |
| ENST000003172040 | -5.17 | 1.48E-03 | 0.0080 |
| KLRB1            | -5.18 | 3.06E-05 | 0.0014 |
| ENST000003817950 | -5.18 | 8.66E-04 | 0.0060 |
| IGLV2-11         | -5.19 | 6.57E-03 | 0.0202 |
| PPBP             | -5.20 | 6.67E-03 | 0.0204 |
| PDLIM1           | -5.21 | 1.25E-03 | 0.0073 |
| LINC00544        | -5.21 | 1.67E-03 | 0.0086 |
| IGHA2            | -5.22 | 6.12E-04 | 0.0050 |
| ENST000003042672 | -5.22 | 8.58E-04 | 0.0059 |
| EDAR             | -5.24 | 1.88E-04 | 0.0029 |
| ENST00000638176  | -5.24 | 1.31E-03 | 0.0075 |
| ENST000003484950 | -5.24 | 9.94E-04 | 0.0064 |
| KRT72            | -5.27 | 1.69E-03 | 0.0087 |
| COL24A1          | -5.27 | 7.60E-04 | 0.0056 |
| AC245519.2       | -5.33 | 1.10E-03 | 0.0068 |
| ALDH1A1          | -5.35 | 8.17E-04 | 0.0058 |
| JCHAIN           | -5.36 | 6.69E-04 | 0.0052 |
| AC146335.1       | -5.37 | 8.77E-04 | 0.0060 |
| TMEM221          | -5.37 | 2.44E-03 | 0.0107 |
| ENST000003142561 | -5.37 | 5.73E-04 | 0.0048 |
| KRT2             | -5.39 | 5.95E-04 | 0.0049 |
| GSAP             | -5.40 | 7.62E-05 | 0.0020 |
| IGLV3-21         | -5.40 | 1.06E-02 | 0.0279 |
| ENST000003252391 | -5.40 | 7.17E-03 | 0.0214 |
| AP003117.1       | -5.40 | 1.05E-03 | 0.0066 |
| IGLV3-1          | -5.41 | 1.57E-03 | 0.0083 |
| MPEG1            | -5.43 | 2.73E-04 | 0.0034 |
| FCER1A           | -5.44 | 1.02E-04 | 0.0023 |
| IGLV2-14         | -5.48 | 1.66E-04 | 0.0028 |
| IGHV3-15         | -5.48 | 4.60E-03 | 0.0160 |
| LINC00861        | -5.48 | 1.35E-06 | 0.0008 |

|                  |       |          |        |
|------------------|-------|----------|--------|
| FXVD7            | -5.48 | 4.79E-04 | 0.0044 |
| IGKV1D-39        | -5.50 | 1.05E-02 | 0.0277 |
| BMS1P17          | -5.50 | 4.82E-04 | 0.0044 |
| SDK2             | -5.51 | 8.04E-04 | 0.0057 |
| VDAC2P2          | -5.51 | 2.24E-03 | 0.0102 |
| AC131210.1       | -5.55 | 4.27E-04 | 0.0041 |
| ENST000003149700 | -5.56 | 6.39E-03 | 0.0198 |
| IGHV3-49         | -5.56 | 9.29E-04 | 0.0062 |
| ENST000002632051 | -5.57 | 8.46E-04 | 0.0059 |
| WDR64            | -5.60 | 4.92E-04 | 0.0044 |
| KRT17P8          | -5.62 | 6.02E-03 | 0.0190 |
| LINC00278        | -5.64 | 1.88E-02 | 0.0421 |
| IGHG1            | -5.67 | 4.84E-04 | 0.0044 |
| MUC20-OT1-876    | -5.67 | 6.53E-03 | 0.0201 |
| AC078927.1       | -5.68 | 6.19E-04 | 0.0050 |
| ENST000002965181 | -5.70 | 3.38E-04 | 0.0037 |
| AC131160.1       | -5.71 | 5.37E-04 | 0.0046 |
| TGFBI            | -5.72 | 7.83E-04 | 0.0056 |
| RASGRP2          | -5.73 | 5.71E-06 | 0.0009 |
| ENST000003103972 | -5.75 | 3.77E-04 | 0.0039 |
| ENST000003123521 | -5.75 | 3.77E-04 | 0.0039 |
| AREG             | -5.75 | 1.25E-05 | 0.0010 |
| IGHV4-59         | -5.75 | 7.78E-04 | 0.0056 |
| ENST000002740561 | -5.76 | 3.26E-04 | 0.0037 |
| IGHV3-11         | -5.77 | 4.08E-04 | 0.0041 |
| ENST000003540641 | -5.85 | 3.27E-04 | 0.0037 |
| ENST000003173611 | -5.86 | 5.10E-04 | 0.0045 |
| GTSCR1           | -5.86 | 4.12E-04 | 0.0041 |
| CCDC65           | -5.86 | 1.02E-03 | 0.0065 |
| IGLV2-23         | -5.86 | 3.06E-03 | 0.0123 |
| ENST000002632850 | -5.87 | 2.31E-02 | 0.0486 |
| ENST000003410121 | -5.88 | 5.87E-04 | 0.0048 |
| IGHV1-69D        | -5.89 | 3.25E-04 | 0.0037 |
| GZMK             | -5.93 | 2.45E-06 | 0.0008 |
| AC044849.1       | -5.98 | 4.56E-03 | 0.0159 |
| IGHV3-48         | -5.99 | 9.74E-04 | 0.0064 |
| ENST000002653753 | -6.14 | 3.67E-04 | 0.0039 |
| CYBB             | -6.18 | 1.33E-03 | 0.0075 |
| ENST000003345570 | -6.18 | 1.77E-04 | 0.0028 |
| ENST000002989101 | -6.24 | 2.35E-04 | 0.0032 |
| IGKV2-28         | -6.29 | 3.02E-04 | 0.0036 |
| A2M-AS1          | -6.29 | 9.38E-04 | 0.0063 |
| AC241640.4       | -6.30 | 3.72E-04 | 0.0039 |
| ENST000003206942 | -6.32 | 2.23E-02 | 0.0475 |
| IGKV1-12         | -6.37 | 1.28E-04 | 0.0025 |
| ENST000003209964 | -6.39 | 1.49E-04 | 0.0026 |
| BTG1P1           | -6.40 | 3.98E-04 | 0.0040 |

|                  |        |          |        |
|------------------|--------|----------|--------|
| IGHG4            | -6.51  | 3.93E-04 | 0.0040 |
| TNFRSF17         | -6.53  | 1.93E-03 | 0.0094 |
| IGLL5            | -6.53  | 4.95E-04 | 0.0044 |
| IGLV7-46         | -6.57  | 1.89E-04 | 0.0029 |
| IATPR            | -6.61  | 3.21E-04 | 0.0037 |
| ENST000002617490 | -6.62  | 9.68E-05 | 0.0022 |
| CCR9             | -6.72  | 1.76E-04 | 0.0028 |
| LINC00402        | -6.86  | 5.58E-07 | 0.0008 |
| ENST000002374490 | -6.97  | 5.28E-05 | 0.0017 |
| CPVL             | -7.01  | 4.89E-05 | 0.0017 |
| IGKV2-30         | -7.17  | 4.06E-05 | 0.0016 |
| FAM19A1          | -7.25  | 2.99E-05 | 0.0014 |
| IGKV3-15         | -7.51  | 1.56E-04 | 0.0027 |
| SORCS3           | -7.69  | 1.74E-05 | 0.0011 |
| ENST000002680491 | -7.97  | 2.59E-04 | 0.0033 |
| AC004832.6       | -8.05  | 7.35E-05 | 0.0020 |
| ENST000002443640 | -8.06  | 9.59E-06 | 0.0010 |
| ENST000002625100 | -8.36  | 4.25E-04 | 0.0041 |
| ENST000003088730 | -8.59  | 7.15E-06 | 0.0010 |
| ENST000003172572 | -8.63  | 1.76E-05 | 0.0011 |
| KLF2             | -9.13  | 2.90E-06 | 0.0009 |
| ENST000003256741 | -9.44  | 7.26E-06 | 0.0010 |
| ENST000003563380 | -10.22 | 4.17E-07 | 0.0008 |
