# Supplementary material for: Human splice factors contribute to latent HIV infection in primary cell models and blood CD4+ T cells from ART-treated individuals
Source: PubMed Central journal article supplement (PMC7728277; doi:10.1371/journal.ppat.1009060), 2020-11-30
Supplement: ppat.1009060.s004.pdf [file ppat.1009060.s004.pdf]

**Table S4. List of statistically significant differentially expressed genes (FDR<0.05) in stimulated vs. unstimulated peripheral CD4+ T cells from the Resting-cell model, the Wild-type model (wtNL4.3) and CD4+ T cells from ART-suppressed individuals.** Genes are ranked alphabetically and the average log2 fold change (FC) is shown for each model.

| Gene name  | Gene description                                                     | Gene Family (a)       | Fold Change (log2) |                 |         |
|------------|----------------------------------------------------------------------|-----------------------|--------------------|-----------------|---------|
|            |                                                                      |                       | Resting-cell       | Wild-type virus | Ex vivo |
| AC008555.1 | novel transcript                                                     |                       | -6.98              | -4.21           | -2.23   |
| AC022079.1 | novel transcript, sense intronic to CCDC91                           |                       | -7.80              | -2.91           | -3.18   |
| AC025171.4 | novel transcript                                                     |                       | -7.32              | -5.04           | -4.71   |
| AC112721.2 | novel protein (LOC728009)                                            |                       | 7.02               | 6.09            | 4.68    |
| AC130324.3 | novel transcript, antisense to                                       |                       | 7.67               | 2.36            | 2.49    |
| AC241520.1 | zinc finger protein pseudogene                                       |                       | -8.51              | -1.58           | -2.04   |
| ACTG1      | actin gamma 1 [Source:HGNC Symbol;Acc:HGNC:144]                      |                       | 2.25               | 1.70            | 1.95    |
| AL354793.1 | novel transcript                                                     |                       | -6.27              | -1.87           | -1.77   |
| AL391832.3 | novel transcript                                                     |                       | 5.56               | 6.01            | 3.24    |
| AL445524.1 | novel transcript                                                     |                       | 7.97               | 4.46            | 3.09    |
| AMY2B      | amylase alpha 2B (pancreatic) [Source:HGNC                           |                       | -2.77              | -2.35           | -2.38   |
| ANKLE2     | ankyrin repeat and LEM domain containing 2 [Source:HGNC              |                       | 1.31               | 1.09            | 1.07    |
| AP002365.1 | programmed cell death 2, pseudogene                                  |                       | -8.35              | -6.23           | -3.82   |
| AP003472.1 | novel transcript                                                     |                       | 12.27              | 10.48           | 10.78   |
| ARF6       | ADP ribosylation factor 6 [Source:HGNC Symbol;Acc:HGNC:659]          |                       | 1.66               | 1.19            | 1.38    |
| ARFGEF3    | ARFGEF family member 3 [Source:HGNC Symbol;Acc:HGNC:21213]           |                       | 9.95               | 4.00            | 2.57    |
| ARID5A     | AT-rich interaction domain 5A [Source:HGNC Symbol;Acc:HGNC:17361]    | Transcription factors | 2.60               | 1.56            | 1.84    |
| ASAH1      | N-acylsphingosine amidohydrolase 1 [Source:HGNC Symbol;Acc:HGNC:735] |                       | -1.43              | -1.51           | -1.05   |
| ATM        | ATM serine/threonine kinase [Source:HGNC Symbol;Acc:HGNC:795]        | Protein kinases       | -3.72              | -2.87           | -3.26   |

|           |                                                                                          |                       |       |       |       |
|-----------|------------------------------------------------------------------------------------------|-----------------------|-------|-------|-------|
| B3GALT2   | beta-1,3-galactosyltransferase 2 [Source:HGNC Symbol;Acc:HGNC:917]                       |                       | -9.73 | -6.71 | -3.42 |
| BATF      | basic leucine zipper ATF-like transcription factor [Source:HGNC Symbol;Acc:HGNC:958]     | Transcription factors | 3.70  | 3.09  | 4.10  |
| BATF3     | basic leucine zipper ATF-like transcription factor 3 [Source:HGNC Symbol;Acc:HGNC:28915] | Transcription factors | 9.65  | 6.55  | 7.03  |
| BCO2      | beta-carotene oxygenase 2 [Source:HGNC Symbol;Acc:HGNC:18503]                            |                       | -7.30 | -1.38 | -0.84 |
| BIN2      | bridging integrator 2 [Source:HGNC Symbol;Acc:HGNC:1053]                                 |                       | -1.31 | -2.51 | -1.56 |
| BRCA1     | BRCA1 DNA repair associated [Source:HGNC Symbol;Acc:HGNC:1100]                           |                       | 3.70  | 4.60  | 5.12  |
| BRI3BP    | BRI3 binding protein [Source:HGNC Symbol;Acc:HGNC:14251]                                 |                       | 1.34  | 2.19  | 2.16  |
| BRWD1     | bromodomain and WD repeat domain containing 1 [Source:HGNC Symbol;Acc:HGNC:12760]        |                       | -1.75 | 1.71  | -1.29 |
| BTG1P1    | BTG anti-proliferation factor 1 pseudogene 1 [Source:HGNC Symbol;Acc:HGNC:37692]         |                       | -6.80 | -4.18 | -6.40 |
| C12orf42  | chromosome 12 open reading frame 42 [Source:HGNC Symbol;Acc:HGNC:24729]                  |                       | -8.92 | -2.84 | -4.78 |
| C1GALT1P1 | C1GALT1 pseudogene 1 [Source:HGNC Symbol;Acc:HGNC:51614]                                 |                       | -6.89 | -3.07 | -2.16 |
| C3orf14   | chromosome 3 open reading frame 14 [Source:HGNC Symbol;Acc:HGNC:25024]                   |                       | 7.88  | 2.60  | 3.21  |

|            |                                                                              |                              |       |       |       |
|------------|------------------------------------------------------------------------------|------------------------------|-------|-------|-------|
| C4orf47    | chromosome 4 open reading frame 47 [Source:HGNC Symbol;Acc:HGNC:34346]       |                              | 8.64  | 4.54  | 3.74  |
| CALM3      | calmodulin 3 [Source:HGNC Symbol;Acc:HGNC:1449]                              |                              | 2.26  | 2.38  | 2.62  |
| CASP1P2    | caspase 1 pseudogene 2 [Source:HGNC Symbol;Acc:HGNC:43776]                   |                              | -8.21 | -3.51 | -2.52 |
| CCDC150    | coiled-coil domain containing 150 [Source:HGNC Symbol;Acc:HGNC:26834]        |                              | 9.65  | 4.17  | 3.88  |
| CCDC88C    | coiled-coil domain containing 88C [Source:HGNC Symbol;Acc:HGNC:19967]        |                              | -0.98 | -0.89 | -1.02 |
| CCNL2      | cyclin L2 [Source:HGNC Symbol;Acc:HGNC:20570]                                |                              | -1.63 | -0.65 | -1.06 |
| CCNT2      | cyclin T2 [Source:HGNC Symbol;Acc:HGNC:1600]                                 | HIV interaction              | -1.32 | -1.34 | -0.90 |
| CD200      | CD200 molecule [Source:HGNC Symbol;Acc:HGNC:7203]                            | Cell differentiation markers | 2.60  | 4.81  | 4.69  |
| CDC6       | cell division cycle 6 [Source:HGNC Symbol;Acc:HGNC:1744]                     |                              | 4.69  | 5.41  | 6.05  |
| CDCA2      | cell division cycle associated 2 [Source:HGNC Symbol;Acc:HGNC:14623]         |                              | 8.78  | 5.24  | 6.36  |
| CDKN2B-AS1 | CDKN2B antisense RNA 1 [Source:HGNC Symbol;Acc:HGNC:34341]                   |                              | -6.03 | -2.49 | -1.64 |
| CENPM      | centromere protein M [Source:HGNC Symbol;Acc:HGNC:18352]                     |                              | 9.66  | 4.14  | 3.49  |
| CENPN      | centromere protein N [Source:HGNC Symbol;Acc:HGNC:30873]                     |                              | 3.04  | 3.91  | 3.89  |
| CFAP58     | cilia and flagella associated protein 58 [Source:HGNC Symbol;Acc:HGNC:26676] |                              | 7.34  | 3.69  | 5.27  |

|         |                                                                                 |                       |       |       |       |
|---------|---------------------------------------------------------------------------------|-----------------------|-------|-------|-------|
| CHAF1B  | chromatin assembly factor 1 subunit B [Source:HGNC Symbol;Acc:HGNC:1911]        |                       | 2.98  | 2.42  | 2.51  |
| CHST3   | carbohydrate sulfotransferase 3 [Source:HGNC Symbol;Acc:HGNC:1971]              |                       | 5.85  | 2.79  | 1.06  |
| CLIC1   | chloride intracellular channel 1 [Source:HGNC Symbol;Acc:HGNC:2062]             |                       | 2.74  | 0.92  | 1.90  |
| CORO1B  | coronin 1B [Source:HGNC Symbol;Acc:HGNC:2253]                                   |                       | 4.14  | 0.90  | 2.65  |
| DCLRE1B | DNA cross-link repair 1B [Source:HGNC Symbol;Acc:HGNC:17641]                    |                       | 3.67  | 1.98  | 3.13  |
| DHFR    | dihydrofolate reductase [Source:HGNC Symbol;Acc:HGNC:2861]                      |                       | 3.20  | 2.83  | 3.80  |
| DOT1L   | DOT1 like histone lysine methyltransferase [Source:HGNC Symbol;Acc:HGNC:24948]  |                       | 1.54  | 1.36  | 1.44  |
| DSC1    | desmocollin 1 [Source:HGNC Symbol;Acc:HGNC:3035]                                |                       | -9.70 | -5.21 | -4.94 |
| DSN1    | DSN1 component of MIS12 kinetochore complex [Source:HGNC Symbol;Acc:HGNC:16165] |                       | 1.45  | 1.83  | 2.12  |
| EDAR    | ectodysplasin A receptor [Source:HGNC Symbol;Acc:HGNC:2895]                     |                       | -4.83 | -4.66 | -5.24 |
| EIF4H   | eukaryotic translation initiation factor 4H [Source:HGNC Symbol;Acc:HGNC:12741] | Transcription factors | 1.73  | 1.76  | 1.56  |
| EMP1    | epithelial membrane protein 1 [Source:HGNC Symbol;Acc:HGNC:3333]                |                       | 9.03  | 4.13  | 4.50  |
| ENO1    | enolase 1 [Source:HGNC Symbol;Acc:HGNC:3350]                                    | Transcription factors | 4.69  | 3.28  | 3.70  |
| EVI2B   | ecotropic viral integration site 2B [Source:HGNC Symbol;Acc:HGNC:3500]          |                       | -3.52 | -3.13 | -2.47 |

|         |                                                                                       |  |       |       |       |
|---------|---------------------------------------------------------------------------------------|--|-------|-------|-------|
| FAM19A1 | TAF1 chemokine like family member 1 [Source:HGNC Symbol;Acc:HGNC:21587]               |  | -9.25 | -7.19 | -7.25 |
| FAM57A  | TLC domain containing 3A [Source:HGNC Symbol;Acc:HGNC:29646]                          |  | 9.59  | 3.40  | 4.23  |
| FAM71B  | family with sequence similarity 71 member B [Source:HGNC Symbol;Acc:HGNC:28397]       |  | 8.36  | 6.24  | 4.70  |
| FANCI   | FA complementation group I [Source:HGNC Symbol;Acc:HGNC:25568]                        |  | 3.10  | 2.93  | 3.46  |
| FBXO43  | F-box protein 43 [Source:HGNC Symbol;Acc:HGNC:28521]                                  |  | 7.47  | 5.05  | 4.61  |
| FMR1    | fragile X mental retardation 1 [Source:HGNC Symbol;Acc:HGNC:3775]                     |  | -1.31 | -0.60 | -1.10 |
| FSD1    | fibronectin type III and SPRY domain containing 1 [Source:HGNC Symbol;Acc:HGNC:13745] |  | 8.73  | 1.17  | 1.39  |
| FYB1    | FYN binding protein 1 [Source:HGNC Symbol;Acc:HGNC:4036]                              |  | -2.99 | -2.92 | -2.43 |
| FYCO1   | FYVE and coiled-coil domain containing 1 [Source:HGNC Symbol;Acc:HGNC:14673]          |  | -0.91 | -1.69 | -0.95 |
| GALM    | galactose mutarotase [Source:HGNC Symbol;Acc:HGNC:24063]                              |  | 0.57  | 1.71  | 2.66  |
| GALNT18 | polypeptide N-acetylgalactosaminyltransferase 18 [Source:HGNC Symbol;Acc:HGNC:30488]  |  | 9.61  | 8.25  | 6.32  |
| GAPDH   | glyceraldehyde-3-phosphate dehydrogenase [Source:HGNC Symbol;Acc:HGNC:4141]           |  | 4.90  | 3.90  | 3.92  |

|          |                                                                                   |                                 |       |       |       |
|----------|-----------------------------------------------------------------------------------|---------------------------------|-------|-------|-------|
| GARS     | glycyl-tRNA synthetase<br>[Source:HGNC<br>Symbol;Acc:HGNC:4162]                   |                                 | 1.01  | 1.85  | 2.84  |
| GBP3     | guanylate binding protein 3<br>[Source:HGNC<br>Symbol;Acc:HGNC:4184]              |                                 | -3.13 | -2.52 | -2.57 |
| GIMAP1   | GTPase, IMAP family member<br>1 [Source:HGNC<br>Symbol;Acc:HGNC:23237]            |                                 | -3.08 | -3.06 | -1.96 |
| GIMAP7   | GTPase, IMAP family member<br>7 [Source:HGNC<br>Symbol;Acc:HGNC:22404]            |                                 | -3.12 | -3.29 | -1.51 |
| GJC1     | gap junction protein gamma 1<br>[Source:HGNC<br>Symbol;Acc:HGNC:4280]             |                                 | 8.41  | 1.36  | 0.88  |
| GNG5     | G protein subunit gamma 5<br>[Source:HGNC<br>Symbol;Acc:HGNC:4408]                |                                 | 1.46  | 1.87  | 2.30  |
| GNPDA1   | glucosamine-6-phosphate<br>deaminase 1 [Source:HGNC<br>Symbol;Acc:HGNC:4417]      |                                 | 3.18  | 1.87  | 1.87  |
| GPA33    | glycoprotein A33<br>[Source:HGNC<br>Symbol;Acc:HGNC:4445]                         |                                 | -9.61 | -6.32 | -4.77 |
| GPN1     | GPN-loop GTPase 1<br>[Source:HGNC<br>Symbol;Acc:HGNC:17030]                       |                                 | 1.25  | 1.37  | 1.09  |
| HCG27    | HLA complex group 27<br>[Source:HGNC<br>Symbol;Acc:HGNC:27366]                    |                                 | -9.97 | -1.27 | -1.06 |
| HIPK3    | homeodomain interacting<br>protein kinase 3 [Source:HGNC<br>Symbol;Acc:HGNC:4915] | Protein kinases                 | -0.73 | -0.52 | -0.68 |
| HIST1H4A | histone cluster 1 H4 family<br>member a [Source:HGNC<br>Symbol;Acc:HGNC:4781]     |                                 | 8.59  | 4.49  | 2.75  |
| HIST1H4F | histone cluster 1 H4 family<br>member f [Source:HGNC<br>Symbol;Acc:HGNC:4783]     |                                 | 3.14  | 3.25  | 3.29  |
| IFNG     | interferon gamma<br>[Source:HGNC<br>Symbol;Acc:HGNC:5438]                         | Cytokines and<br>growth factors | 14.06 | 5.91  | 7.13  |

|          |                                                                                                |                              |       |       |       |
|----------|------------------------------------------------------------------------------------------------|------------------------------|-------|-------|-------|
| IGSF6    | immunoglobulin superfamily member 6 [Source:HGNC Symbol;Acc:HGNC:5953]                         |                              | -7.14 | -1.09 | -1.81 |
| IKBKE    | inhibitor of nuclear factor kappa B kinase subunit epsilon [Source:HGNC Symbol;Acc:HGNC:14552] | Protein kinases              | -1.53 | -1.78 | -1.39 |
| IL13     | interleukin 13 [Source:HGNC Symbol;Acc:HGNC:5973]                                              | Cytokines and growth factors | 9.22  | 4.05  | 8.10  |
| IL1A     | interleukin 1 alpha [Source:HGNC Symbol;Acc:HGNC:5991]                                         | Cytokines and growth factors | 7.01  | 8.56  | 8.82  |
| IL21     | interleukin 21 [Source:HGNC Symbol;Acc:HGNC:6005]                                              | Cytokines and growth factors | 9.14  | 7.71  | 8.59  |
| IL23R    | interleukin 23 receptor [Source:HGNC Symbol;Acc:HGNC:19100]                                    |                              | 2.75  | 4.98  | 4.29  |
| IL24     | interleukin 24 [Source:HGNC Symbol;Acc:HGNC:11346]                                             | Cytokines and growth factors | 2.24  | 8.33  | 8.19  |
| IPCEF1   | interaction protein for cytohesin exchange factors 1 [Source:HGNC Symbol;Acc:HGNC:21204]       |                              | -2.81 | -2.75 | -2.77 |
| IRS2     | insulin receptor substrate 2 [Source:HGNC Symbol;Acc:HGNC:6126]                                |                              | -2.27 | -2.11 | -4.12 |
| ITM2B    | integral membrane protein 2B [Source:HGNC Symbol;Acc:HGNC:6174]                                |                              | -2.54 | -1.92 | -2.19 |
| KCNA2    | potassium voltage-gated channel subfamily A member 2 [Source:HGNC Symbol;Acc:HGNC:6220]        |                              | -7.46 | -2.45 | -4.05 |
| KIAA1551 | retroelement silencing factor 1 [Source:HGNC Symbol;Acc:HGNC:25559]                            |                              | -3.04 | -2.73 | -2.17 |
| KIF11    | kinesin family member 11 [Source:HGNC Symbol;Acc:HGNC:6388]                                    |                              | 3.32  | 3.81  | 4.65  |

|           |                                                                                             |                                    |       |       |       |
|-----------|---------------------------------------------------------------------------------------------|------------------------------------|-------|-------|-------|
| KIF15     | kinesin family member 15<br>[Source:HGNC<br>Symbol;Acc:HGNC:17273]                          |                                    | 3.56  | 5.55  | 5.80  |
| KLF3      | Kruppel like factor 3<br>[Source:HGNC<br>Symbol;Acc:HGNC:16516]                             | Transcription<br>factors           | -3.03 | -4.17 | -3.79 |
| KLF3-AS1  | KLF3 antisense RNA 1<br>[Source:HGNC<br>Symbol;Acc:HGNC:25796]                              |                                    | -9.34 | -0.81 | -1.50 |
| KLHDC1    | kelch domain containing 1<br>[Source:HGNC<br>Symbol;Acc:HGNC:19836]                         |                                    | -4.97 | -2.14 | -2.49 |
| KLRB1     | killer cell lectin like receptor B1<br>[Source:HGNC<br>Symbol;Acc:HGNC:6373]                | Cell<br>differentiation<br>markers | -8.03 | -4.57 | -5.18 |
| L3HYPDH   | trans-L-3-hydroxyproline<br>dehydratase [Source:HGNC<br>Symbol;Acc:HGNC:20488]              |                                    | -2.21 | -1.58 | -1.09 |
| L3MBTL3   | L3MBTL histone methyl-lysine<br>binding protein 3<br>[Source:HGNC<br>Symbol;Acc:HGNC:23035] |                                    | -2.11 | -1.37 | -2.40 |
| LCP1      | lymphocyte cytosolic protein 1<br>[Source:HGNC<br>Symbol;Acc:HGNC:6528]                     |                                    | 1.39  | 1.03  | 1.30  |
| LEMD3     | LEM domain containing 3<br>[Source:HGNC<br>Symbol;Acc:HGNC:28887]                           |                                    | -0.62 | -0.59 | -0.61 |
| LILRB4    | leukocyte immunoglobulin like<br>receptor B4 [Source:HGNC<br>Symbol;Acc:HGNC:6608]          | Cell<br>differentiation<br>markers | -7.26 | -1.80 | -2.92 |
| LIMA1     | LIM domain and actin binding 1<br>[Source:HGNC<br>Symbol;Acc:HGNC:24636]                    | Transcription<br>factors           | 2.36  | 2.74  | 2.81  |
| LINC00158 | long intergenic non-protein<br>coding RNA 158 [Source:HGNC<br>Symbol;Acc:HGNC:1283]         | Long-non-coding<br>RNAs            | 6.83  | 8.32  | 4.30  |
| LINC00205 | long intergenic non-protein<br>coding RNA 205 [Source:HGNC<br>Symbol;Acc:HGNC:16420]        | Long-non-coding<br>RNAs            | -6.72 | -2.19 | -1.70 |



|           |                                                                                              |                      |       |       |       |
|-----------|----------------------------------------------------------------------------------------------|----------------------|-------|-------|-------|
| LINC01138 | long intergenic non-protein coding RNA 1138<br>[Source:HGNC Symbol;Acc:HGNC:49454]           | Long-non-coding RNAs | -1.93 | -2.57 | -1.65 |
| LINC02328 | long intergenic non-protein coding RNA 2328<br>[Source:HGNC Symbol;Acc:HGNC:53248]           | Long-non-coding RNAs | -9.12 | -2.13 | -2.64 |
| LINC02362 | long intergenic non-protein coding RNA 2362<br>[Source:HGNC Symbol;Acc:HGNC:53284]           | Long-non-coding RNAs | -9.12 | -1.85 | -1.59 |
| LINC02416 | long intergenic non-protein coding RNA 2416<br>[Source:HGNC Symbol;Acc:HGNC:53345]           | Long-non-coding RNAs | 9.77  | 3.33  | 1.93  |
| LMAN1     | lectin, mannose binding 1<br>[Source:HGNC Symbol;Acc:HGNC:6631]                              |                      | 1.87  | 1.73  | 2.22  |
| LSM12     | LSM12 homolog [Source:HGNC Symbol;Acc:HGNC:26407]                                            |                      | 1.05  | 1.89  | 2.54  |
| MAGOH     | mago homolog, exon junction complex subunit [Source:HGNC Symbol;Acc:HGNC:6815]               | Metabolism of RNA    | 1.06  | 1.35  | 1.20  |
| MAK       | male germ cell associated kinase [Source:HGNC Symbol;Acc:HGNC:6816]                          | Protein kinases      | 8.19  | 4.92  | 4.33  |
| MAN1C1    | mannosidase alpha class 1C member 1 [Source:HGNC Symbol;Acc:HGNC:19080]                      |                      | -1.71 | -3.57 | -1.68 |
| MAP3K1    | mitogen-activated protein kinase kinase kinase 1<br>[Source:HGNC Symbol;Acc:HGNC:6848]       | Protein kinases      | -2.03 | -1.36 | -2.11 |
| MBTPS1    | membrane bound transcription factor peptidase, site 1<br>[Source:HGNC Symbol;Acc:HGNC:15456] |                      | -1.23 | -1.00 | -0.89 |
| MDH2      | malate dehydrogenase 2<br>[Source:HGNC Symbol;Acc:HGNC:6971]                                 |                      | 2.37  | 1.67  | 2.19  |

|        |                                                                                                                                         |                              |       |       |       |
|--------|-----------------------------------------------------------------------------------------------------------------------------------------|------------------------------|-------|-------|-------|
| MELK   | maternal embryonic leucine zipper kinase [Source:HGNC Symbol;Acc:HGNC:16870]                                                            | Protein kinases              | 10.75 | 5.67  | 5.98  |
| MFSD10 | major facilitator superfamily domain containing 10 [Source:HGNC Symbol;Acc:HGNC:16894]                                                  |                              | 2.17  | 1.99  | 2.14  |
| MGAT4A | alpha-1,3-mannosyl-glycoprotein 4-beta-N-acetylglucosaminyltransferase A [Source:HGNC Symbol;Acc:HGNC:7047]                             |                              | -2.00 | -1.83 | -1.41 |
| MIA3   | MIA SH3 domain ER export factor 3 [Source:HGNC Symbol;Acc:HGNC:24008]                                                                   |                              | -1.06 | -1.39 | -0.61 |
| MND1   | meiotic nuclear divisions 1 [Source:HGNC Symbol;Acc:HGNC:24839]                                                                         |                              | 9.80  | 6.93  | 5.81  |
| MORC2  | MORC family CW-type zinc finger 2 [Source:HGNC Symbol;Acc:HGNC:23573]                                                                   |                              | -0.81 | -1.02 | -0.79 |
| MRPL47 | mitochondrial ribosomal protein L47 [Source:HGNC Symbol;Acc:HGNC:16652]                                                                 |                              | 1.96  | 1.71  | 1.79  |
| MRPS10 | mitochondrial ribosomal protein S10 [Source:HGNC Symbol;Acc:HGNC:14502]                                                                 |                              | -0.58 | 1.06  | 1.16  |
| MSL2   | MSL complex subunit 2 [Source:HGNC Symbol;Acc:HGNC:25544]                                                                               |                              | -0.96 | -0.92 | -0.70 |
| MTHFD2 | methylenetetrahydrofolate dehydrogenase (NADP+ dependent) 2, methenyltetrahydrofolate cyclohydrolase [Source:HGNC Symbol;Acc:HGNC:7434] |                              | 2.65  | 2.94  | 4.21  |
| NAMPT  | nicotinamide phosphoribosyltransferase [Source:HGNC Symbol;Acc:HGNC:30092]                                                              | Cytokines and growth factors | 5.67  | 4.87  | 4.36  |

|        |                                                                                 |                                    |       |       |       |
|--------|---------------------------------------------------------------------------------|------------------------------------|-------|-------|-------|
| NCAPD2 | non-SMC condensin I complex subunit D2 [Source:HGNC Symbol;Acc:HGNC:24305]      |                                    | 1.98  | 2.04  | 3.10  |
| NCS1   | neuronal calcium sensor 1 [Source:HGNC Symbol;Acc:HGNC:3953]                    |                                    | 7.81  | 5.63  | 7.57  |
| NIPAL1 | NIPA like domain containing 1 [Source:HGNC Symbol;Acc:HGNC:27194]               |                                    | 9.62  | 1.64  | 1.39  |
| NLE1   | notchless homolog 1 [Source:HGNC Symbol;Acc:HGNC:19889]                         |                                    | 1.34  | 2.07  | 1.51  |
| NOB1   | NIN1 (RPN12) binding protein 1 homolog [Source:HGNC Symbol;Acc:HGNC:29540]      | Metabolism of RNA                  | 1.78  | 0.93  | 2.08  |
| NUP155 | nucleoporin 155 [Source:HGNC Symbol;Acc:HGNC:8063]                              | Metabolism of RNA; HIV interaction | 1.42  | 1.99  | 1.97  |
| OCM    | oncomodulin [Source:HGNC Symbol;Acc:HGNC:8105]                                  |                                    | -9.64 | -5.45 | -3.66 |
| ODF2   | outer dense fiber of sperm tails 2 [Source:HGNC Symbol;Acc:HGNC:8114]           |                                    | 1.23  | 1.44  | 2.02  |
| P4HA2  | prolyl 4-hydroxylase subunit alpha 2 [Source:HGNC Symbol;Acc:HGNC:8547]         |                                    | 10.03 | 5.14  | 4.88  |
| PALD1  | phosphatase domain containing paladin 1 [Source:HGNC Symbol;Acc:HGNC:23530]     |                                    | 8.03  | 2.32  | 1.79  |
| PAPOLA | poly(A) polymerase alpha [Source:HGNC Symbol;Acc:HGNC:14981]                    | Metabolism of RNA                  | -0.75 | -0.54 | -0.61 |
| PARP8  | poly(ADP-ribose) polymerase family member 8 [Source:HGNC Symbol;Acc:HGNC:26124] |                                    | -2.33 | -2.19 | -2.69 |
| PAXIP1 | PAX interacting protein 1 [Source:HGNC Symbol;Acc:HGNC:8624]                    | Transcription factors              | 1.15  | 1.08  | 1.06  |

|           |                                                                                                         |                                          |       |       |       |
|-----------|---------------------------------------------------------------------------------------------------------|------------------------------------------|-------|-------|-------|
| PBK       | PDZ binding kinase<br>[Source:HGNC<br>Symbol;Acc:HGNC:18282]                                            | Protein kinases                          | 8.30  | 7.48  | 6.90  |
| PDAP1     | PDGFA associated protein 1<br>[Source:HGNC<br>Symbol;Acc:HGNC:14634]                                    |                                          | 1.38  | 1.79  | 2.35  |
| PDCD1     | programmed cell death 1<br>[Source:HGNC<br>Symbol;Acc:HGNC:8760]                                        | Cell<br>differentiation<br>markers       | 4.19  | 6.50  | 3.46  |
| PGK1      | phosphoglycerate kinase 1<br>[Source:HGNC<br>Symbol;Acc:HGNC:8896]                                      |                                          | 3.41  | 3.51  | 2.39  |
| PHF3      | PHD finger protein 3<br>[Source:HGNC<br>Symbol;Acc:HGNC:8921]                                           | Transcription<br>factors                 | -0.94 | -0.56 | -0.62 |
| PIKFYVE   | phosphoinositide kinase, FYVE-<br>type zinc finger containing<br>[Source:HGNC<br>Symbol;Acc:HGNC:23785] |                                          | -1.11 | -0.82 | -0.57 |
| PIM3      | Pim-3 proto-oncogene,<br>serine/threonine kinase<br>[Source:HGNC<br>Symbol;Acc:HGNC:19310]              | Protein kinases                          | 2.33  | 2.94  | 2.46  |
| PLCL1     | phospholipase C like 1<br>(inactive) [Source:HGNC<br>Symbol;Acc:HGNC:9063]                              |                                          | -2.89 | -3.32 | -3.69 |
| POT1-AS1  | POT1 antisense RNA 1<br>[Source:HGNC<br>Symbol;Acc:HGNC:49459]                                          |                                          | -7.97 | -1.74 | -1.48 |
| PSMA3-AS1 | PSMA3 antisense RNA 1<br>[Source:HGNC<br>Symbol;Acc:HGNC:26445]                                         |                                          | -1.60 | -1.24 | -2.02 |
| PSMD14    | proteasome 26S subunit, non-<br>ATPase 14 [Source:HGNC<br>Symbol;Acc:HGNC:16889]                        | Metabolism of<br>RNA; HIV<br>interaction | 1.39  | 2.10  | 2.35  |
| PSRC1     | proline and serine rich coiled-<br>coil 1 [Source:HGNC<br>Symbol;Acc:HGNC:24472]                        |                                          | 7.56  | 3.14  | 5.47  |
| PTPN11    | protein tyrosine phosphatase<br>non-receptor type 11<br>[Source:HGNC<br>Symbol;Acc:HGNC:9644]           |                                          | 1.38  | 2.02  | 1.76  |

|           |                                                                                                           |                       |       |       |       |
|-----------|-----------------------------------------------------------------------------------------------------------|-----------------------|-------|-------|-------|
| RAB1A     | RAB1A, member RAS oncogene family [Source:HGNC Symbol;Acc:HGNC:9758]                                      |                       | 0.56  | 0.88  | 0.78  |
| RAB27A    | RAB27A, member RAS oncogene family [Source:HGNC Symbol;Acc:HGNC:9766]                                     |                       | 1.97  | 1.29  | 1.76  |
| RAC3      | Rac family small GTPase 3 [Source:HGNC Symbol;Acc:HGNC:9803]                                              |                       | 8.46  | 4.01  | 2.42  |
| RAD51AP1  | RAD51 associated protein 1 [Source:HGNC Symbol;Acc:HGNC:16956]                                            |                       | 3.35  | 5.51  | 5.03  |
| RAI14     | retinoic acid induced 14 [Source:HGNC Symbol;Acc:HGNC:14873]                                              |                       | 7.86  | 2.75  | 2.43  |
| RANBP1    | RAN binding protein 1 [Source:HGNC Symbol;Acc:HGNC:9847]                                                  | HIV interaction       | 2.44  | 3.21  | 3.18  |
| RANGAP1   | Ran GTPase activating protein 1 [Source:HGNC Symbol;Acc:HGNC:9854]                                        | HIV interaction       | 1.25  | 1.95  | 1.99  |
| RASSF3    | Ras association domain family member 3 [Source:HGNC Symbol;Acc:HGNC:14271]                                |                       | -2.71 | -2.23 | -1.84 |
| RBPJ      | recombination signal binding protein for immunoglobulin kappa J region [Source:HGNC Symbol;Acc:HGNC:5724] |                       | 1.92  | 1.91  | 1.81  |
| RHPN2     | rhophilin Rho GTPase binding protein 2 [Source:HGNC Symbol;Acc:HGNC:19974]                                | Transcription factors | 6.84  | 2.88  | 2.05  |
| RMDN1     | regulator of microtubule dynamics 1 [Source:HGNC Symbol;Acc:HGNC:24285]                                   |                       | 0.94  | 0.74  | 1.09  |
| RN7SL471P | RNA, 7SL, cytoplasmic 471, pseudogene [Source:HGNC Symbol;Acc:HGNC:46487]                                 |                       | 9.63  | 5.20  | 7.29  |

|          |                                                                                                           |                                          |       |       |       |
|----------|-----------------------------------------------------------------------------------------------------------|------------------------------------------|-------|-------|-------|
| RNF216   | ring finger protein 216<br>[Source:HGNC<br>Symbol;Acc:HGNC:21698]                                         |                                          | -1.85 | -1.05 | -1.11 |
| RNVU1-7  | RNA, variant U1 small nuclear 7<br>[Source:HGNC<br>Symbol;Acc:HGNC:37500]                                 | Metabolism of<br>RNA                     | 6.83  | 1.96  | 2.19  |
| SAFB2    | scaffold attachment factor B2<br>[Source:HGNC<br>Symbol;Acc:HGNC:21605]                                   |                                          | -1.00 | -0.61 | -0.70 |
| SAMD9    | sterile alpha motif domain<br>containing 9 [Source:HGNC<br>Symbol;Acc:HGNC:1348]                          |                                          | -3.02 | -2.99 | -2.16 |
| SCML4    | Scm polycomb group protein<br>like 4 [Source:HGNC<br>Symbol;Acc:HGNC:21397]                               |                                          | -2.84 | -2.93 | -3.35 |
| SDC4     | syndecan 4 [Source:HGNC<br>Symbol;Acc:HGNC:10661]                                                         |                                          | 3.90  | 6.49  | 5.04  |
| SEC13    | SEC13 homolog, nuclear pore<br>and COPII coat complex<br>component [Source:HGNC<br>Symbol;Acc:HGNC:10697] | Metabolism of<br>RNA; HIV<br>interaction | 1.05  | 1.33  | 1.67  |
| SGO2     | shugoshin 2 [Source:HGNC<br>Symbol;Acc:HGNC:30812]                                                        |                                          | 1.66  | 3.14  | 4.51  |
| SHMT2    | serine<br>hydroxymethyltransferase 2<br>[Source:HGNC<br>Symbol;Acc:HGNC:10852]                            |                                          | 3.05  | 2.81  | 3.83  |
| SLC17A9  | solute carrier family 17<br>member 9 [Source:HGNC<br>Symbol;Acc:HGNC:16192]                               |                                          | 7.95  | 2.10  | 1.76  |
| SLC22A23 | solute carrier family 22<br>member 23 [Source:HGNC<br>Symbol;Acc:HGNC:21106]                              |                                          | -8.60 | -5.24 | -3.60 |
| SMCR8    | SMCR8-C9orf72 complex<br>subunit [Source:HGNC<br>Symbol;Acc:HGNC:17921]                                   |                                          | -2.24 | -0.98 | -1.17 |
| SNHG14   | small nucleolar RNA host gene<br>14 [Source:HGNC<br>Symbol;Acc:HGNC:37462]                                |                                          | -1.92 | -1.18 | -1.01 |
| SNHG16   | small nucleolar RNA host gene<br>16 [Source:HGNC<br>Symbol;Acc:HGNC:44352]                                |                                          | 1.50  | 2.01  | 0.77  |

|         |                                                                                        |                   |       |       |       |
|---------|----------------------------------------------------------------------------------------|-------------------|-------|-------|-------|
| SNRNP25 | small nuclear ribonucleoprotein U11/U12 subunit 25 [Source:HGNC Symbol;Acc:HGNC:14161] | Metabolism of RNA | 3.69  | 2.48  | 3.72  |
| SNRPD2  | small nuclear ribonucleoprotein D2 polypeptide [Source:HGNC Symbol;Acc:HGNC:11159]     | Metabolism of RNA | 1.22  | 1.31  | 1.54  |
| SORL1   | sortilin related receptor 1 [Source:HGNC Symbol;Acc:HGNC:11185]                        |                   | -2.60 | -2.56 | -2.54 |
| SPC25   | SPC25 component of NDC80 kinetochore complex [Source:HGNC Symbol;Acc:HGNC:24031]       |                   | 8.46  | 4.46  | 4.24  |
| SPR     | sepiapterin reductase [Source:HGNC Symbol;Acc:HGNC:11257]                              |                   | 7.59  | 7.78  | 6.42  |
| SRGN    | serglycin [Source:HGNC Symbol;Acc:HGNC:9361]                                           |                   | 3.12  | 2.60  | 1.23  |
| SSBP2   | single stranded DNA binding protein 2 [Source:HGNC Symbol;Acc:HGNC:15831]              |                   | -1.64 | -1.60 | -1.88 |
| STAP2   | signal transducing adaptor family member 2 [Source:HGNC Symbol;Acc:HGNC:30430]         |                   | 7.72  | 1.75  | 2.02  |
| STARD4  | StAR related lipid transfer domain containing 4 [Source:HGNC Symbol;Acc:HGNC:18058]    |                   | 3.06  | 1.63  | 2.23  |
| STK38   | serine/threonine kinase 38 [Source:HGNC Symbol;Acc:HGNC:17847]                         | Protein kinases   | -2.80 | -2.69 | -1.97 |
| STXBP5  | syntaxin binding protein 5 [Source:HGNC Symbol;Acc:HGNC:19665]                         |                   | -1.35 | -1.17 | -0.97 |
| STYX    | serine/threonine/tyrosine interacting protein [Source:HGNC Symbol;Acc:HGNC:11447]      |                   | -0.98 | -1.04 | -0.74 |

|          |                                                                             |                              |       |       |       |
|----------|-----------------------------------------------------------------------------|------------------------------|-------|-------|-------|
| SYNGR3   | synaptogyrin 3 [Source:HGNC Symbol;Acc:HGNC:11501]                          |                              | 7.47  | 4.26  | 2.92  |
| SYNPO2   | synaptopodin 2 [Source:HGNC Symbol;Acc:HGNC:17732]                          |                              | -7.63 | -1.69 | -1.72 |
| SYTL3    | synaptotagmin like 3 [Source:HGNC Symbol;Acc:HGNC:15587]                    |                              | 3.65  | 2.69  | 2.07  |
| TBX21    | T-box transcription factor 21 [Source:HGNC Symbol;Acc:HGNC:11599]           | Transcription factors        | 3.51  | 3.83  | 2.64  |
| TC2N     | tandem C2 domains, nuclear [Source:HGNC Symbol;Acc:HGNC:19859]              |                              | -2.66 | -3.45 | -2.25 |
| TFDP1    | transcription factor Dp-1 [Source:HGNC Symbol;Acc:HGNC:11749]               | Transcription factors        | 2.72  | 2.60  | 2.45  |
| THAP4    | THAP domain containing 4 [Source:HGNC Symbol;Acc:HGNC:23187]                |                              | 1.15  | 0.77  | 1.29  |
| TK1      | thymidine kinase 1 [Source:HGNC Symbol;Acc:HGNC:11830]                      |                              | 9.63  | 4.72  | 5.93  |
| TMEM116  | transmembrane protein 116 [Source:HGNC Symbol;Acc:HGNC:25084]               |                              | -1.47 | -0.97 | -1.18 |
| TMEM191A | transmembrane protein 191A (pseudogene) [Source:HGNC Symbol;Acc:HGNC:25317] |                              | -7.65 | -3.10 | -2.50 |
| TMEM256  | transmembrane protein 256 [Source:HGNC Symbol;Acc:HGNC:28618]               |                              | 5.70  | 1.06  | 1.54  |
| TNFRSF4  | TNF receptor superfamily member 4 [Source:HGNC Symbol;Acc:HGNC:11918]       | Cell differentiation markers | 5.49  | 6.21  | 4.07  |
| TONSL    | tonsoku like, DNA repair protein [Source:HGNC Symbol;Acc:HGNC:7801]         | Transcription factors        | 2.89  | 2.21  | 2.95  |
| TPM4     | tropomyosin 4 [Source:HGNC Symbol;Acc:HGNC:12013]                           |                              | 3.11  | 1.82  | 2.07  |



|             |                                                                                              |                              |       |       |       |
|-------------|----------------------------------------------------------------------------------------------|------------------------------|-------|-------|-------|
| TRANK1      | tetratricopeptide repeat and ankyrin repeat containing 1 [Source:HGNC Symbol;Acc:HGNC:29011] |                              | -3.17 | -3.87 | -1.85 |
| TRMT6       | tRNA methyltransferase 6 [Source:HGNC Symbol;Acc:HGNC:20900]                                 | Metabolism of RNA            | 1.54  | 0.79  | 1.24  |
| TSC22D1-AS1 | TSC22D1 antisense RNA 1 [Source:HGNC Symbol;Acc:HGNC:43684]                                  |                              | -8.01 | -1.70 | -3.19 |
| TTK         | TTK protein kinase [Source:HGNC Symbol;Acc:HGNC:12401]                                       | Protein kinases              | 4.15  | 5.19  | 5.96  |
| TUBA1B      | tubulin alpha 1b [Source:HGNC Symbol;Acc:HGNC:18809]                                         |                              | 3.89  | 4.76  | 4.29  |
| TULP4       | TUB like protein 4 [Source:HGNC Symbol;Acc:HGNC:15530]                                       | Transcription factors        | -1.85 | -1.10 | -1.84 |
| TXLNA       | taxilin alpha [Source:HGNC Symbol;Acc:HGNC:30685]                                            | Cytokines and growth factors | 1.46  | 1.18  | 1.91  |
| UTRN        | utrophin [Source:HGNC Symbol;Acc:HGNC:12635]                                                 |                              | -2.23 | -1.60 | -2.13 |
| WDR76       | WD repeat domain 76 [Source:HGNC Symbol;Acc:HGNC:25773]                                      |                              | 2.65  | 2.35  | 3.26  |
| WNT7A       | Wnt family member 7A [Source:HGNC Symbol;Acc:HGNC:12786]                                     |                              | -8.87 | -5.72 | -4.91 |
| XRCC3       | X-ray repair cross complementing 3 [Source:HGNC Symbol;Acc:HGNC:12830]                       |                              | 2.99  | 2.80  | 2.51  |
| YEATS2      | YEATS domain containing 2 [Source:HGNC Symbol;Acc:HGNC:25489]                                |                              | 1.86  | 1.35  | 1.56  |
| ZBTB32      | zinc finger and BTB domain containing 32 [Source:HGNC Symbol;Acc:HGNC:16763]                 | Transcription factors        | 12.37 | 7.32  | 6.40  |
| ZEB1        | zinc finger E-box binding homeobox 1 [Source:HGNC Symbol;Acc:HGNC:11642]                     | Transcription factors        | -0.94 | -0.78 | -1.17 |

|        |                                                                   |                          |       |       |       |
|--------|-------------------------------------------------------------------|--------------------------|-------|-------|-------|
| ZNF181 | zinc finger protein 181<br>[Source:HGNC<br>Symbol;Acc:HGNC:12971] |                          | -3.30 | -1.32 | -0.69 |
| ZNF235 | zinc finger protein 235<br>[Source:HGNC<br>Symbol;Acc:HGNC:12866] | Transcription<br>factors | -1.86 | -2.08 | -1.27 |
| ZNF367 | zinc finger protein 367<br>[Source:HGNC<br>Symbol;Acc:HGNC:18320] |                          | 1.85  | 2.89  | 3.03  |
| ZNF44  | zinc finger protein 44<br>[Source:HGNC<br>Symbol;Acc:HGNC:13110]  | Transcription<br>factors | -2.39 | -1.54 | -1.44 |
| ZNF548 | zinc finger protein 548<br>[Source:HGNC<br>Symbol;Acc:HGNC:26561] |                          | -1.78 | -0.97 | -1.33 |
| ZNF75D | zinc finger protein 75D<br>[Source:HGNC<br>Symbol;Acc:HGNC:13145] |                          | -2.21 | -1.63 | -0.84 |
| ZNF792 | zinc finger protein 792<br>[Source:HGNC<br>Symbol;Acc:HGNC:24751] |                          | -1.41 | -1.54 | -1.06 |
| ZNF879 | zinc finger protein 879<br>[Source:HGNC<br>Symbol;Acc:HGNC:37273] |                          | -2.80 | -1.90 | -1.54 |

a. Gene family determined by Gene Set Enrichment Analysis (GSEA) and Reactome databases
